# Supplementary material for: Single-cell discovery of m6A RNA modifications in the hippocampus
Source: Genome Res. 2024 Jun;34(6):822–36. doi: 10.1101/gr.278424.123 (PMC11293556; doi:10.1101/gr.278424.123)
Supplement: Supplement 2 [file Supplemental_Fig_S2.docx]

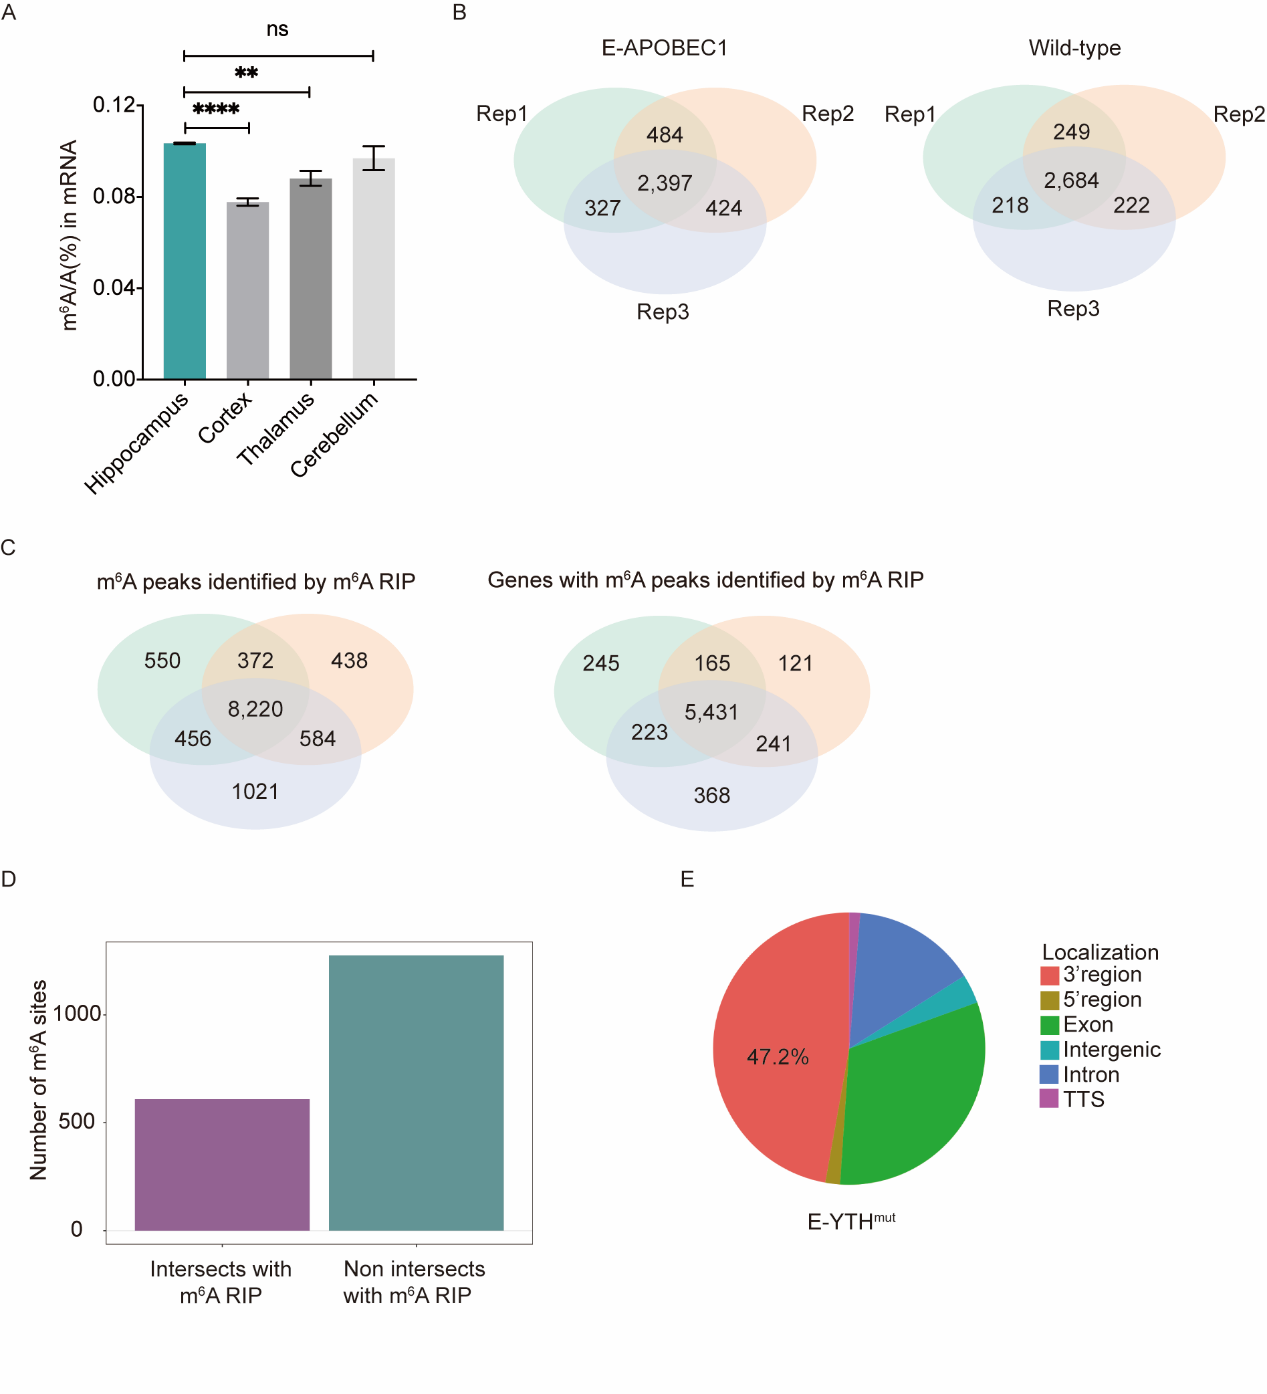


**Supplemental Fig S2. Detection of m6A with bulk RNA-seq in mouse hippocampus.**

(A) LC-MS/MS quantification of m6A within mRNA relative to unmodified adenosines in mRNA. mRNA was isolated from the hippocampus, cortex, thalamus and cerebellum of 3-month-old mice. n=3. The difference between individual groups compared with the hippocampus was tested using Tukey's multiple comparisons test. *****P*£0.0001, ****P*£0.001, ***P*£0.01. **P*£0.05.

(B) Number of C-to-U editing events identified in each bulk RNA-seq replicate for controls including E-APOBEC1 and wild type mice. The data was obtained following AAV infection and EGFP FACS sorting. n=3, Rep: biological replicate, hippocampus from one mouse.

(C) Number of m6A peaks (left) and number of genes with m6A peaks (right) identified in each m6A RIP replicate from wild type mouse hippocampi. n=3, Rep: biological replicate, hippocampus from one mouse.

(D) Bar plot showing number of m6A sites detected by bulk E-YTH that do and do not intersect with m6A peaks identified with m6A RIP.

(E) Pie chart showing C-to-U edit localization identified with E-YTHmut in mouse hippocampus. TTS: transcription termination site.
