# Supplementary material for: Single-cell discovery of m6A RNA modifications in the hippocampus
Source: Genome Res. 2024 Jun;34(6):822–36. doi: 10.1101/gr.278424.123 (PMC11293556; doi:10.1101/gr.278424.123)
Supplement: Supplement 3 [file Supplemental_Fig_S3.docx]

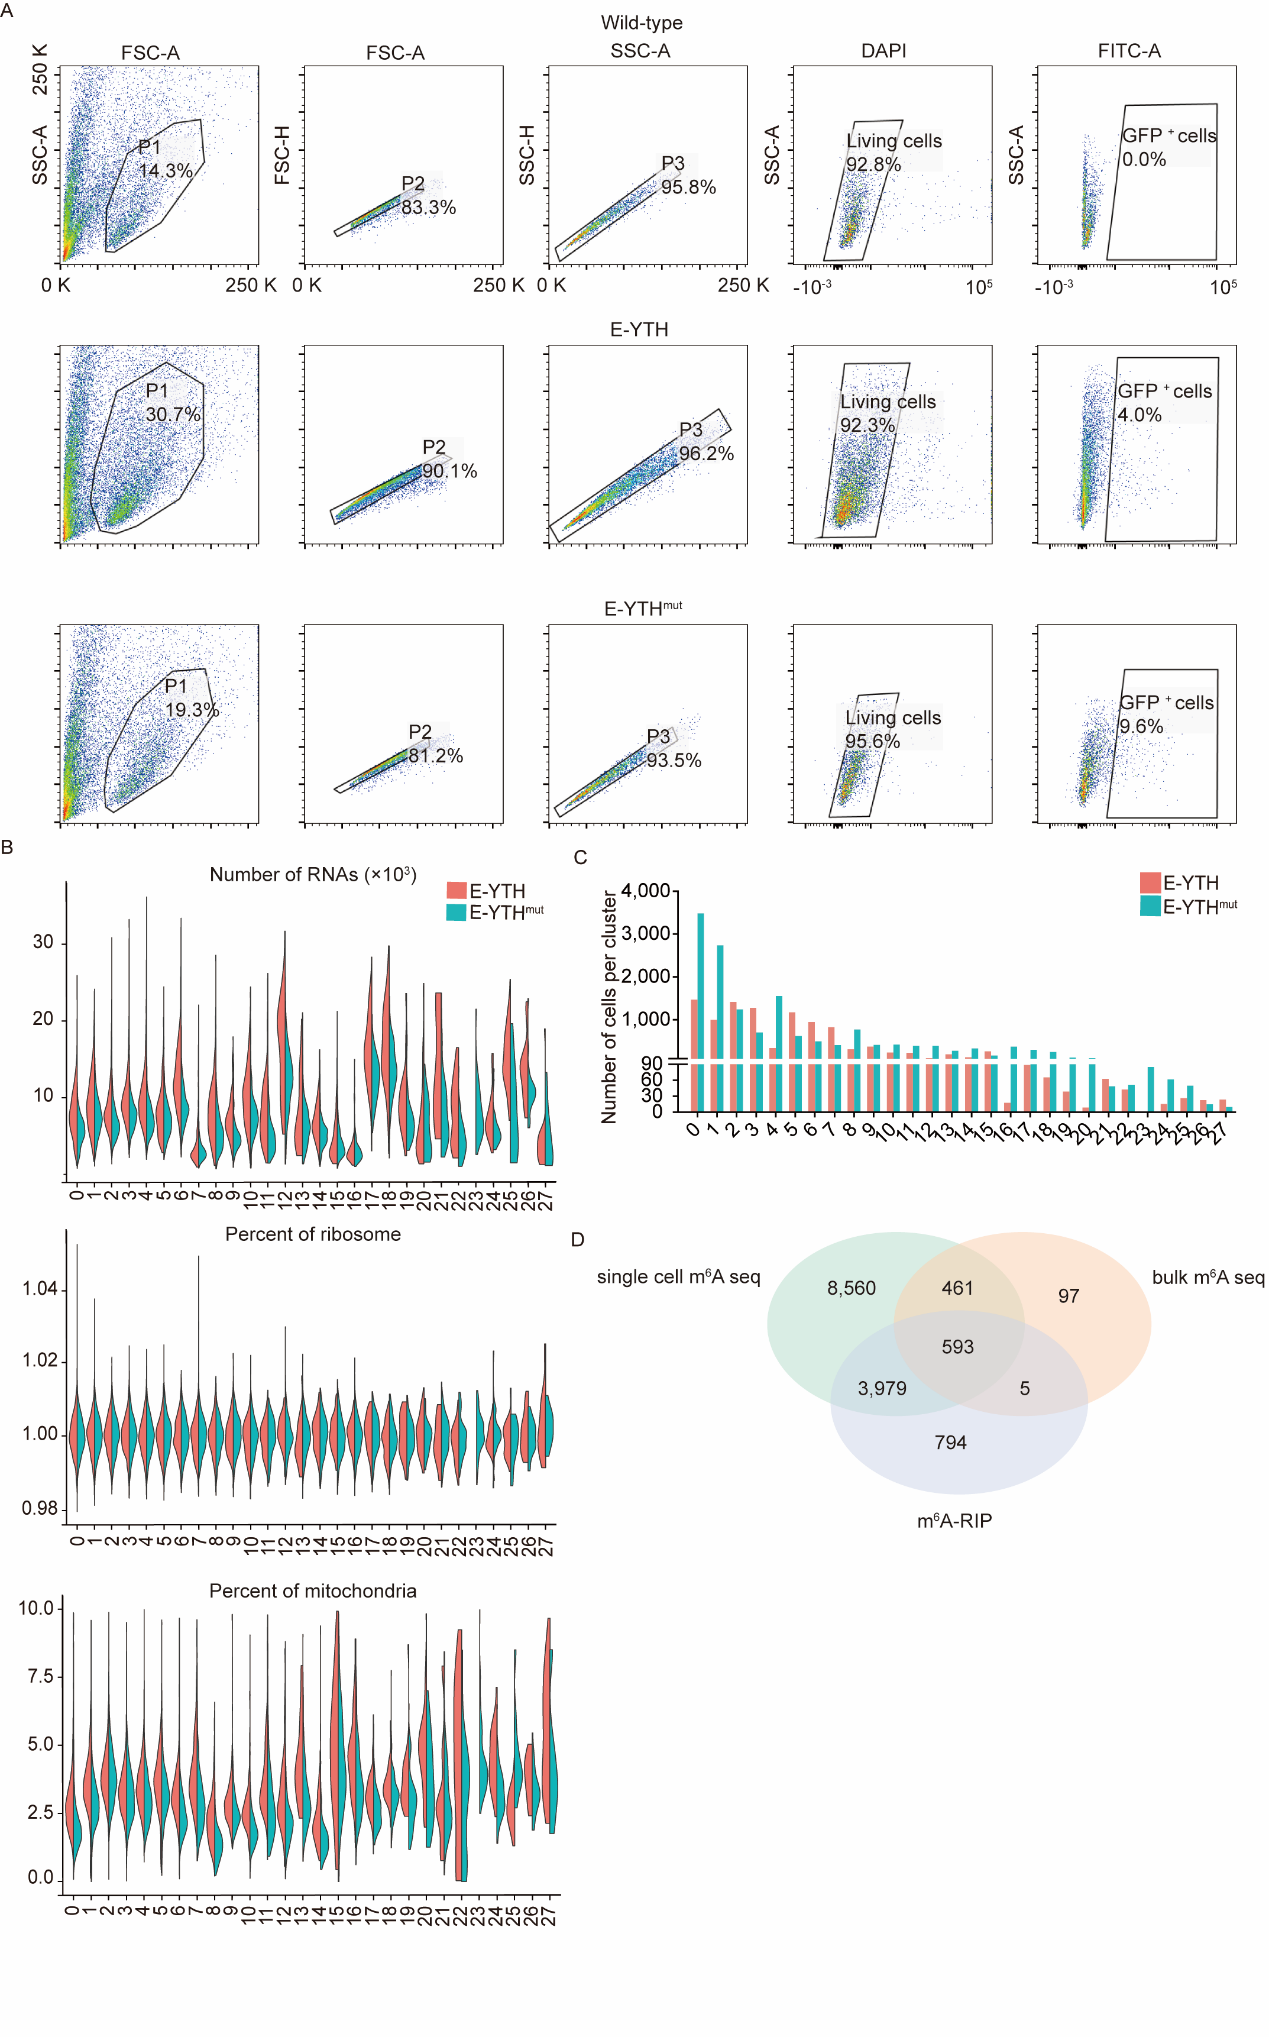


**Supplemental Fig S3. Hippocampal single-cell identification following AAV transduction.**

(A) Isolation of EGFP positive E-YTH, E-YTHmut and wild-type cells from mouse hippocampi. FACS gating is shown. The value indicates percentage of cells in the selected gate.

(B) Single cell quality controls. Top: Violin plot showing the number of RNAs per cell cluster. Middle: Violin plot illustrating the percentage of ribosomal RNA per cell cluster. Bottom: Violin plot visualizing the percentage of mitochondrial RNA per cell cluster.

(C) Bar plot with number of cells identified per cluster.

(D) Venn diagram showing the number of genes with m6A regions detected by single cell, bulk and m6A RIP RNA-seq.
