# Supplementary material for: Single-cell discovery of m6A RNA modifications in the hippocampus
Source: Genome Res. 2024 Jun;34(6):822–36. doi: 10.1101/gr.278424.123 (PMC11293556; doi:10.1101/gr.278424.123)
Supplement: Supplement 11 [file Supplemental_Table_S1.xlsx]

## Sheet: Table S1
Bulk RNA-seq showing C-to-U edits identified in 3 replicates in HEK293T cell line
	YTH-E	YTHmut-E	APOBEC1-E	Mock	E-YTH	E-YTHmut	E-APOBEC1
Replicate 1 specific	482656	319345	281240	2775	166842	144150	210005
Replicate 2 specific	94183	71025	319709	1742	79811	60711	30340
Replicate 3 specific	163956	157929	34132	1976	121053	73727	42935
Replicate 1 and 2	54573	38388	138837	2041	44893	50146	43340
Replicate 2 and 3	23684	20531	9803	341	14799	11058	2292
Replicate 1 and 3	78103	61280	9663	342	31326	20298	18954
Replicate 1,2 and 3	52896	43734	31657	7961	36444	34145	20400
Sum of at least 2 replicates of 3	209256	163933	189960	10685	127462	115647	84986
