# Supplementary material for: Single-cell discovery of m6A RNA modifications in the hippocampus
Source: Genome Res. 2024 Jun;34(6):822–36. doi: 10.1101/gr.278424.123 (PMC11293556; doi:10.1101/gr.278424.123)
Supplement: Supplement 12 [file Supplemental_Table_S2.xlsx]

## Sheet: Summary 
Percentage of C-to-U edits per read identified in YTH-E and E-YTH plasmid-expressing HEK293T cells.
m/k value	YTH-E	E-YTH
5%-25%	87090	47939
25%-50%	17122	5303
50%-75%	2499	1136
75%-100%	116	17
Sum	106827	54395
