# Supplementary material for: Single-cell discovery of m6A RNA modifications in the hippocampus
Source: Genome Res. 2024 Jun;34(6):822–36. doi: 10.1101/gr.278424.123 (PMC11293556; doi:10.1101/gr.278424.123)
Supplement: Supplement 13 [file Supplemental_Table_S3.xlsx]

## Sheet: Readme
Description: 1. Summary of m6A sites of Metaplot plot for YTH-E and E-YTH in HEK293T cells. 2. YTH-E_m6A_sites_UTR 5 terminal 3. YTH-E_m6A_sites_CDS 4. YTH-E_m6A_sites_UTR 3 terminal 5. E-YTH_m6A_sites_UTR 5 terminal 6. E-YTH_m6A_sites_CDS 7. E-YTH_m6A_sites_UTR 3 terminal

## Sheet: Summary
Summary of m6A site distribution for YTH-E and E-YTH in HEK293T cells
YTH-E
	5'UTR	CDS	3'UTR
Minimum	0	41	1
1st Quantile	104	878	816
Median	202	1367	1644
Mean	267.6	1703	2085
3rd Quantile	341	2060	2824
Max	4592	20657	18849
E-YTH
	5'UTR	CDS	3'UTR
Minimum	0	77	0
1st Quantile	104	827	865
Median	202	1310	1682
Mean	265.9	1693	2154
3rd Quantile	340	2024	2928
Max	4237	18920	17331

## Sheet: YTH-E_m6A_sites_UTR 5 terminal
chr	coord	gene_name	refseqID	rel_location	utr5_st	utr5_end	cds_st	cds_end	utr3_st	utr3_end	utr5_size	cds_size	utr3_size
chr1	2125285	C1orf86	ENST00000400919.3	0.238541	254	-814	-815	-1258	-1259	-2058	1068	443	799
chr1	10002762	LZIC	ENST00000377213.1	0.610619	137	-88	-89	-661	-662	-807	225	572	145
chr1	10002782	LZIC	ENST00000377213.1	0.522124	117	-108	-109	-681	-682	-827	225	572	145
chr1	12677438	DHRS3	ENST00000376223.2	0.78125	299	-84	-85	-993	-994	-1423	383	908	429
chr1	12677483	DHRS3	ENST00000376223.2	0.664062	254	-129	-130	-1038	-1039	-1468	383	908	429
chr1	22404956	CDC42	ENST00000315554.8	0.855769	88	-15	-16	-591	-592	-1363	103	575	771
chr1	32384696	PTP4A2	ENST00000344035.6	0.970825	964	-29	-30	-533	-534	-2964	993	503	2430
chr1	32384740	PTP4A2	ENST00000344035.6	0.926559	920	-73	-74	-577	-578	-3008	993	503	2430
chr1	32384756	PTP4A2	ENST00000344035.6	0.910463	904	-89	-90	-593	-594	-3024	993	503	2430
chr1	33005048	ZBTB8A	ENST00000316459.4	0.0837004	18	-208	-209	-1231	-1232	-1924	226	1022	692
chr1	41157438	NFYC	ENST00000425457.2	0.31875	50	-109	-110	-1174	-1175	-1485	159	1064	310
chr1	41157478	NFYC	ENST00000425457.2	0.56875	90	-69	-70	-1134	-1135	-1445	159	1064	310
chr1	41625461	SCMH1	ENST00000326197.7	0.563333	168	-131	-132	-2114	-2115	-3106	299	1982	991
chr1	41625483	SCMH1	ENST00000326197.7	0.49	146	-153	-154	-2136	-2137	-3128	299	1982	991
chr1	44413171	IPO13	ENST00000372343.3	0.847432	560	-101	-102	-2993	-2994	-3333	661	2891	339
chr1	44413182	IPO13	ENST00000372343.3	0.864048	571	-90	-91	-2982	-2983	-3322	661	2891	339
chr1	46125999	GPBP1L1	ENST00000290795.3	0.837971	1023	-198	-199	-1623	-1624	-2575	1221	1424	951
chr1	46126318	GPBP1L1	ENST00000290795.3	0.576923	704	-517	-518	-1942	-1943	-2894	1221	1424	951
chr1	46126698	GPBP1L1	ENST00000290795.3	0.265957	324	-897	-898	-2322	-2323	-3274	1221	1424	951
chr1	46597631	PIK3R3	ENST00000262741.5	0.991304	683	-6	-7	-1392	-1393	-4925	689	1385	3532
chr1	46597642	PIK3R3	ENST00000262741.5	0.975362	672	-17	-18	-1403	-1404	-4936	689	1385	3532
chr1	47183945	EFCAB14	ENST00000371933.3	0.810645	791	-185	-186	-1673	-1674	-4975	976	1487	3301
chr1	47183999	EFCAB14	ENST00000371933.3	0.755374	737	-239	-240	-1727	-1728	-5029	976	1487	3301
chr1	47184037	EFCAB14	ENST00000371933.3	0.716479	699	-277	-278	-1765	-1766	-5067	976	1487	3301
chr1	47184074	EFCAB14	ENST00000371933.3	0.678608	662	-314	-315	-1802	-1803	-5104	976	1487	3301
chr1	47184245	EFCAB14	ENST00000371933.3	0.503582	491	-485	-486	-1973	-1974	-5275	976	1487	3301
chr1	47184258	EFCAB14	ENST00000371933.3	0.490276	478	-498	-499	-1986	-1987	-5288	976	1487	3301
chr1	47184297	EFCAB14	ENST00000371933.3	0.450358	439	-537	-538	-2025	-2026	-5327	976	1487	3301
chr1	47184392	EFCAB14	ENST00000371933.3	0.353122	344	-632	-633	-2120	-2121	-5422	976	1487	3301
chr1	47184423	EFCAB14	ENST00000371933.3	0.321392	313	-663	-664	-2151	-2152	-5453	976	1487	3301
chr1	47184596	EFCAB14	ENST00000371933.3	0.144319	140	-836	-837	-2324	-2325	-5626	976	1487	3301
chr1	51435535	CDKN2C	ENST00000262662.1	0.976893	1986	-47	-48	-554	-555	-917	2033	506	362
chr1	52520980	TXNDC12	ENST00000371626.4	0.803721	863	-211	-212	-730	-731	-1532	1074	518	801
chr1	52991966	ZCCHC11	ENST00000257177.4	0.910345	131	-13	-14	-4951	-4952	-5611	144	4937	659
chr1	62902650	USP1	ENST00000339950.4	0.398773	324	-490	-491	-2848	-2849	-3671	814	2357	822
chr1	62902725	USP1	ENST00000339950.4	0.490798	399	-415	-416	-2773	-2774	-3596	814	2357	822
chr1	62902780	USP1	ENST00000339950.4	0.558282	454	-360	-361	-2718	-2719	-3541	814	2357	822
chr1	62905489	USP1	ENST00000339950.4	0.939877	765	-49	-50	-2407	-2408	-3230	814	2357	822
chr1	62905507	USP1	ENST00000339950.4	0.961963	783	-31	-32	-2389	-2390	-3212	814	2357	822
chr1	63836474	ALG6	ENST00000263440.4	0.163462	33	-174	-175	-1704	-1705	-1861	207	1529	156
chr1	63836493	ALG6	ENST00000263440.4	0.254808	52	-155	-156	-1685	-1686	-1842	207	1529	156
chr1	63836511	ALG6	ENST00000263440.4	0.341346	70	-137	-138	-1667	-1668	-1824	207	1529	156
chr1	63836535	ALG6	ENST00000263440.4	0.456731	94	-113	-114	-1643	-1644	-1800	207	1529	156
chr1	78099064	ZZZ3	ENST00000370801.3	0.94958	451	-24	-25	-2736	-2737	-3876	475	2711	1139
chr1	78105147	ZZZ3	ENST00000370801.3	0.865546	411	-64	-65	-2776	-2777	-3916	475	2711	1139
chr1	78105206	ZZZ3	ENST00000370801.3	0.741597	352	-123	-124	-2835	-2836	-3975	475	2711	1139
chr1	78105212	ZZZ3	ENST00000370801.3	0.728992	346	-129	-130	-2841	-2842	-3981	475	2711	1139
chr1	78105239	ZZZ3	ENST00000370801.3	0.672269	319	-156	-157	-2868	-2869	-4008	475	2711	1139
chr1	78107269	ZZZ3	ENST00000370801.3	0.306723	145	-330	-331	-3042	-3043	-4182	475	2711	1139
chr1	78107276	ZZZ3	ENST00000370801.3	0.292017	138	-337	-338	-3049	-3050	-4189	475	2711	1139
chr1	78107282	ZZZ3	ENST00000370801.3	0.279412	132	-343	-344	-3055	-3056	-4195	475	2711	1139
chr1	78470602	DNAJB4	ENST00000370763.5	0.252918	64	-192	-193	-1206	-1207	-2923	256	1013	1716
chr1	78470653	DNAJB4	ENST00000370763.5	0.451362	115	-141	-142	-1155	-1156	-2872	256	1013	1716
chr1	84543957	PRKACB	ENST00000370688.3	0.71978	130	-51	-52	-825	-826	-1774	181	773	948
chr1	84971801	GNG5	ENST00000370641.3	0.945148	447	-26	-27	-233	-234	-472	473	206	238
chr1	85136914	SSX2IP	ENST00000342203.3	0.958333	252	-11	-12	-1856	-1857	-5582	263	1844	3725
chr1	87379908	2023-09-15	ENST00000331835.5	0.536122	140	-122	-123	-611	-612	-1636	262	488	1024
chr1	87379946	2023-09-15	ENST00000331835.5	0.391635	102	-160	-161	-649	-650	-1674	262	488	1024
chr1	89449612	RBMXL1	ENST00000321792.5	0.761682	325	-102	-103	-1275	-1276	-4473	427	1172	3197
chr1	93812006	DR1	ENST00000370267.1	0.666099	390	-196	-197	-727	-728	-1256	586	530	528
chr1	93812020	DR1	ENST00000370267.1	0.689949	404	-182	-183	-713	-714	-1242	586	530	528
chr1	93812108	DR1	ENST00000370267.1	0.839864	492	-94	-95	-625	-626	-1154	586	530	528
chr1	93812135	DR1	ENST00000370267.1	0.88586	519	-67	-68	-598	-599	-1127	586	530	528
chr1	95392617	CNN3	ENST00000370206.4	0.567708	217	-166	-167	-1156	-1157	-1947	383	989	790
chr1	101360199	EXTL2	ENST00000370113.3	0.592334	169	-117	-118	-1110	-1111	-2665	286	992	1554
chr1	101360264	EXTL2	ENST00000370113.3	0.365854	104	-182	-183	-1175	-1176	-2730	286	992	1554
chr1	101491253	DPH5	ENST00000370109.3	0.672566	75	-37	-38	-895	-896	-1240	112	857	344
chr1	107599478	PRMT6	ENST00000361318.5	0.854839	211	-36	-37	-987	-988	-2427	247	950	1439
chr1	107599490	PRMT6	ENST00000361318.5	0.903226	223	-24	-25	-975	-976	-2415	247	950	1439
chr1	109235114	PRPF38B	ENST00000370021.1	0.238619	151	-485	-486	-1793	-1794	-3576	636	1307	1782
chr1	109427974	GPSM2	ENST00000264126.3	0.657258	325	-170	-171	-2225	-2226	-2706	495	2054	480
chr1	109428051	GPSM2	ENST00000264126.3	0.8125	402	-93	-94	-2148	-2149	-2629	495	2054	480
chr1	109428063	GPSM2	ENST00000264126.3	0.836694	414	-81	-82	-2136	-2137	-2617	495	2054	480
chr1	109428066	GPSM2	ENST00000264126.3	0.842742	417	-78	-79	-2133	-2134	-2614	495	2054	480
chr1	109428101	GPSM2	ENST00000264126.3	0.913306	452	-43	-44	-2098	-2099	-2579	495	2054	480
chr1	109428126	GPSM2	ENST00000264126.3	0.96371	477	-18	-19	-2073	-2074	-2554	495	2054	480
chr1	109428141	GPSM2	ENST00000264126.3	0.993952	492	-3	-4	-2058	-2059	-2539	495	2054	480
chr1	114448035	DCLRE1B	ENST00000369563.3	0.612108	272	-173	-174	-1772	-1773	-3667	445	1598	1894
chr1	115292518	CSDE1	ENST00000339438.6	0.829596	369	-76	-77	-2380	-2381	-3636	445	2303	1255
chr1	115292522	CSDE1	ENST00000339438.6	0.820628	365	-80	-81	-2384	-2385	-3640	445	2303	1255
chr1	115292529	CSDE1	ENST00000339438.6	0.804933	358	-87	-88	-2391	-2392	-3647	445	2303	1255
chr1	115292550	CSDE1	ENST00000339438.6	0.757848	337	-108	-109	-2412	-2413	-3668	445	2303	1255
chr1	117209111	IGSF3	ENST00000369483.1	0.770213	542	-162	-163	-3807	-3808	-6710	704	3644	2902
chr1	117209130	IGSF3	ENST00000369483.1	0.743262	523	-181	-182	-3826	-3827	-6729	704	3644	2902
chr1	117209140	IGSF3	ENST00000369483.1	0.729078	513	-191	-192	-3836	-3837	-6739	704	3644	2902
chr1	117209142	IGSF3	ENST00000369483.1	0.726241	511	-193	-194	-3838	-3839	-6741	704	3644	2902
chr1	117209286	IGSF3	ENST00000369483.1	0.521986	367	-337	-338	-3982	-3983	-6885	704	3644	2902
chr1	117209288	IGSF3	ENST00000369483.1	0.519149	365	-339	-340	-3984	-3985	-6887	704	3644	2902
chr1	117910565	MAN1A2	ENST00000356554.3	0.673469	494	-240	-241	-2166	-2167	-8081	734	1925	5914
chr1	117910680	MAN1A2	ENST00000356554.3	0.829932	609	-125	-126	-2051	-2052	-7966	734	1925	5914
chr1	145438778	TXNIP	ENST00000369317.4	0.928144	309	-24	-25	-1200	-1201	-2617	333	1175	1416
chr1	150974772	FAM63A	ENST00000312210.5	0.846608	573	-104	-105	-1088	-1089	-1826	677	983	737
chr1	150978880	FAM63A	ENST00000312210.5	0.669617	453	-224	-225	-1208	-1209	-1946	677	983	737
chr1	153610589	CHTOP	ENST00000368687.1	0.135747	29	-191	-192	-863	-864	-1064	220	671	200
chr1	153610654	CHTOP	ENST00000368687.1	0.429864	94	-126	-127	-798	-799	-999	220	671	200
chr1	153610662	CHTOP	ENST00000368687.1	0.466063	102	-118	-119	-790	-791	-991	220	671	200
chr1	153610747	CHTOP	ENST00000368687.1	0.850679	187	-33	-34	-705	-706	-906	220	671	200
chr1	154574870	ADAR	ENST00000368471.3	0.35	342	-637	-638	-3433	-3434	-6172	979	2795	2738
chr1	156308004	CCT3	ENST00000295688.3	0.900356	252	-28	-29	-1666	-1667	-1897	280	1637	230
chr1	156697455	ISG20L2	ENST00000313146.6	0.987229	772	-10	-11	-1072	-1073	-2530	782	1061	1457
chr1	156697470	ISG20L2	ENST00000313146.6	0.968072	757	-25	-26	-1087	-1088	-2545	782	1061	1457
chr1	156697480	ISG20L2	ENST00000313146.6	0.9553	747	-35	-36	-1097	-1098	-2555	782	1061	1457
chr1	156697493	ISG20L2	ENST00000313146.6	0.938697	734	-48	-49	-1110	-1111	-2568	782	1061	1457
chr1	156697552	ISG20L2	ENST00000313146.6	0.863346	675	-107	-108	-1169	-1170	-2627	782	1061	1457
chr1	156697607	ISG20L2	ENST00000313146.6	0.793103	620	-162	-163	-1224	-1225	-2682	782	1061	1457
chr1	156697778	ISG20L2	ENST00000313146.6	0.574713	449	-333	-334	-1395	-1396	-2853	782	1061	1457
chr1	156697801	ISG20L2	ENST00000313146.6	0.545338	426	-356	-357	-1418	-1419	-2876	782	1061	1457
chr1	156697816	ISG20L2	ENST00000313146.6	0.526181	411	-371	-372	-1433	-1434	-2891	782	1061	1457
chr1	156697908	ISG20L2	ENST00000313146.6	0.408685	319	-463	-464	-1525	-1526	-2983	782	1061	1457
chr1	156697918	ISG20L2	ENST00000313146.6	0.395913	309	-473	-474	-1535	-1536	-2993	782	1061	1457
chr1	156698841	RRNAD1	ENST00000368216.4	0.912698	574	-55	-56	-1483	-1484	-1679	629	1427	195
chr1	156737356	PRCC	ENST00000271526.4	0.238971	64	-207	-208	-1683	-1684	-2038	271	1475	354
chr1	161146313	B4GALT3	ENST00000319769.5	0.538117	119	-103	-104	-1285	-1286	-1791	222	1181	505
chr1	161146328	B4GALT3	ENST00000319769.5	0.470852	104	-118	-119	-1300	-1301	-1806	222	1181	505
chr1	162531430	UAP1	ENST00000271469.3	0.357616	107	-194	-195	-1763	-1764	-2236	301	1568	472
chr1	162535822	UAP1	ENST00000271469.3	0.880795	265	-36	-37	-1605	-1606	-2078	301	1568	472
chr1	162535833	UAP1	ENST00000271469.3	0.917219	276	-25	-26	-1594	-1595	-2067	301	1568	472
chr1	162535836	UAP1	ENST00000271469.3	0.927152	279	-22	-23	-1591	-1592	-2064	301	1568	472
chr1	162602347	DDR2	ENST00000367921.3	0.249292	87	-265	-266	-2833	-2834	-3008	352	2567	174
chr1	173794308	DARS2	ENST00000239457.5	0.280548	511	-1313	-1314	-1886	-1887	-2725	1824	572	838
chr1	173794315	DARS2	ENST00000239457.5	0.284384	518	-1306	-1307	-1879	-1880	-2718	1824	572	838
chr1	173794367	DARS2	ENST00000239457.5	0.312877	570	-1254	-1255	-1827	-1828	-2666	1824	572	838
chr1	173794373	DARS2	ENST00000239457.5	0.316164	576	-1248	-1249	-1821	-1822	-2660	1824	572	838
chr1	179821821	TOR1AIP2	ENST00000367612.3	0.948454	367	-20	-21	-1433	-1434	-7537	387	1412	6103
chr1	179821823	TOR1AIP2	ENST00000367612.3	0.943299	365	-22	-23	-1435	-1436	-7539	387	1412	6103
chr1	180471427	ACBD6	ENST00000367595.3	0.963663	662	-25	-26	-874	-875	-1007	687	848	132
chr1	182360885	GLUL	ENST00000311223.5	0.509476	456	-440	-441	-1562	-1563	-4262	896	1121	2699
chr1	183441713	SMG7	ENST00000347615.2	0.647059	76	-42	-43	-3456	-3457	-5711	118	3413	2254
chr1	185280296	IVNS1ABP	ENST00000367498.3	0.860353	535	-87	-88	-2016	-2017	-3663	622	1928	1646
chr1	185280364	IVNS1ABP	ENST00000367498.3	0.751204	467	-155	-156	-2084	-2085	-3731	622	1928	1646
chr1	186345028	C1orf27	ENST00000287859.6	0.224	27	-97	-98	-1462	-1463	-3764	124	1364	2301
chr1	197169640	ZBTB41	ENST00000367405.4	0.478261	32	-36	-37	-2766	-2767	-8445	68	2729	5678
chr1	200638915	DDX59	ENST00000331314.6	0.85514	182	-31	-32	-1891	-1892	-2106	213	1859	214
chr1	203770856	ZC3H11A	ENST00000545588.1	0.625555	2393	-1433	-1434	-3866	-3867	-5585	3826	2432	1718
chr1	203771313	ZC3H11A	ENST00000545588.1	0.74497	2850	-976	-977	-3409	-3410	-5128	3826	2432	1718
chr1	203771324	ZC3H11A	ENST00000545588.1	0.747844	2861	-965	-966	-3398	-3399	-5117	3826	2432	1718
chr1	203771442	ZC3H11A	ENST00000545588.1	0.778678	2979	-847	-848	-3280	-3281	-4999	3826	2432	1718
chr1	203771480	ZC3H11A	ENST00000545588.1	0.788607	3017	-809	-810	-3242	-3243	-4961	3826	2432	1718
chr1	203771715	ZC3H11A	ENST00000545588.1	0.850013	3252	-574	-575	-3007	-3008	-4726	3826	2432	1718
chr1	203771740	ZC3H11A	ENST00000545588.1	0.856546	3277	-549	-550	-2982	-2983	-4701	3826	2432	1718
chr1	203771898	ZC3H11A	ENST00000545588.1	0.897831	3435	-391	-392	-2824	-2825	-4543	3826	2432	1718
chr1	203771915	ZC3H11A	ENST00000545588.1	0.902273	3452	-374	-375	-2807	-2808	-4526	3826	2432	1718
chr1	203771919	ZC3H11A	ENST00000545588.1	0.903319	3456	-370	-371	-2803	-2804	-4522	3826	2432	1718
chr1	206139301	FAM72A	ENST00000341209.5	0.992874	417	-3	-4	-333	-334	-1356	420	329	1022
chr1	210001399	DIEXF	ENST00000491415.2	0.842105	47	-9	-10	-2280	-2281	-8398	56	2270	6117
chr1	213224680	RPS6KC1	ENST00000366959.3	0.56	83	-66	-67	-3231	-3232	-5370	149	3164	2138
chr1	216896642	ESRRG	ENST00000366937.1	0.576779	153	-113	-114	-1526	-1527	-5211	266	1412	3684
chr1	220267541	IARS2	ENST00000302637.5	0.836538	86	-17	-18	-3056	-3057	-3455	103	3038	398
chr1	222886137	BROX	ENST00000340934.5	0.598522	242	-163	-164	-1399	-1400	-3881	405	1235	2481
chr1	222886202	BROX	ENST00000340934.5	0.758621	307	-98	-99	-1334	-1335	-3816	405	1235	2481
chr1	222886216	BROX	ENST00000340934.5	0.793103	321	-84	-85	-1320	-1321	-3802	405	1235	2481
chr1	222886259	BROX	ENST00000340934.5	0.899015	364	-41	-42	-1277	-1278	-3759	405	1235	2481
chr1	224517833	NVL	ENST00000281701.6	0.988462	256	-3	-4	-2574	-2575	-2866	259	2570	291
chr1	225117524	DNAH14	ENST00000366849.1	0.754011	140	-46	-47	-1339	-1340	-2074	186	1292	734
chr1	227505199	CDC42BPA	ENST00000334218.5	0.66596	627	-315	-316	-5661	-5662	-10063	942	5345	4401
chr1	227505581	CDC42BPA	ENST00000334218.5	0.26087	245	-697	-698	-6043	-6044	-10445	942	5345	4401
chr1	227834343	ZNF678	ENST00000343776.5	0.814493	280	-64	-65	-1642	-1643	-8275	344	1577	6632
chr1	228328908	GUK1	ENST00000312726.4	0.655602	157	-83	-84	-677	-678	-926	240	593	248
chr1	229440164	SPHAR	ENST00000366688.3	0.0478088	35	-717	-718	-909	-910	-1084	752	191	174
chr1	229440253	SPHAR	ENST00000366688.3	0.166003	124	-628	-629	-820	-821	-995	752	191	174
chr1	229440259	SPHAR	ENST00000366688.3	0.173971	130	-622	-623	-814	-815	-989	752	191	174
chr1	229440290	SPHAR	ENST00000366688.3	0.215139	161	-591	-592	-783	-784	-958	752	191	174
chr1	229440304	SPHAR	ENST00000366688.3	0.233732	175	-577	-578	-769	-770	-944	752	191	174
chr1	229440450	SPHAR	ENST00000366688.3	0.427623	321	-431	-432	-623	-624	-798	752	191	174
chr1	229440510	SPHAR	ENST00000366688.3	0.507304	381	-371	-372	-563	-564	-738	752	191	174
chr1	229440512	SPHAR	ENST00000366688.3	0.50996	383	-369	-370	-561	-562	-736	752	191	174
chr1	229440530	SPHAR	ENST00000366688.3	0.533865	401	-351	-352	-543	-544	-718	752	191	174
chr1	229762055	URB2	ENST00000258243.2	0.551471	74	-61	-62	-4636	-4637	-5538	135	4574	901
chr1	233086418	NTPCR	ENST00000366627.4	0.464789	32	-38	-39	-725	-726	-1729	70	686	1003
chr1	235492710	GGPS1	ENST00000476121.1	0.252157	379	-1127	-1128	-2030	-2031	-2323	1506	902	292
chr1	235492728	GGPS1	ENST00000476121.1	0.264101	397	-1109	-1110	-2012	-2013	-2305	1506	902	292
chr1	235492864	GGPS1	ENST00000476121.1	0.354346	533	-973	-974	-1876	-1877	-2169	1506	902	292
chr1	235492897	GGPS1	ENST00000476121.1	0.376244	566	-940	-941	-1843	-1844	-2136	1506	902	292
chr1	235492905	GGPS1	ENST00000476121.1	0.381553	574	-932	-933	-1835	-1836	-2128	1506	902	292
chr1	235492909	GGPS1	ENST00000476121.1	0.384207	578	-928	-929	-1831	-1832	-2124	1506	902	292
chr1	235493065	GGPS1	ENST00000476121.1	0.487724	734	-772	-773	-1675	-1676	-1968	1506	902	292
chr1	235493236	GGPS1	ENST00000476121.1	0.601194	905	-601	-602	-1504	-1505	-1797	1506	902	292
chr1	235493245	GGPS1	ENST00000476121.1	0.607167	914	-592	-593	-1495	-1496	-1788	1506	902	292
chr1	235493252	GGPS1	ENST00000476121.1	0.611812	921	-585	-586	-1488	-1489	-1781	1506	902	292
chr1	235493286	GGPS1	ENST00000476121.1	0.634373	955	-551	-552	-1454	-1455	-1747	1506	902	292
chr1	235493318	GGPS1	ENST00000476121.1	0.655607	987	-519	-520	-1422	-1423	-1715	1506	902	292
chr1	235493320	GGPS1	ENST00000476121.1	0.656934	989	-517	-518	-1420	-1421	-1713	1506	902	292
chr1	235493322	GGPS1	ENST00000476121.1	0.658261	991	-515	-516	-1418	-1419	-1711	1506	902	292
chr1	235493344	GGPS1	ENST00000476121.1	0.67286	1013	-493	-494	-1396	-1397	-1689	1506	902	292
chr1	235493351	GGPS1	ENST00000476121.1	0.677505	1020	-486	-487	-1389	-1390	-1682	1506	902	292
chr1	235493371	GGPS1	ENST00000476121.1	0.690776	1040	-466	-467	-1369	-1370	-1662	1506	902	292
chr1	235493510	GGPS1	ENST00000476121.1	0.783013	1179	-327	-328	-1230	-1231	-1523	1506	902	292
chr1	235493643	GGPS1	ENST00000476121.1	0.871267	1312	-194	-195	-1097	-1098	-1390	1506	902	292
chr1	236558810	EDARADD	ENST00000359362.5	0.443925	94	-119	-120	-737	-738	-3002	213	617	2264
chr1	241799195	CHML	ENST00000366553.1	0.231707	37	-126	-127	-2097	-2098	-7040	163	1970	4942
chr1	242012094	EXO1	ENST00000348581.5	0.197452	61	-252	-253	-2793	-2794	-3128	313	2540	334
chr1	242012178	EXO1	ENST00000348581.5	0.464968	145	-168	-169	-2709	-2710	-3044	313	2540	334
chr1	242012200	EXO1	ENST00000348581.5	0.535032	167	-146	-147	-2687	-2688	-3022	313	2540	334
chr1	244816506	DESI2	ENST00000263831.7	0.483412	101	-109	-110	-595	-596	-757	210	485	161
chr10	15144235	RPP38	ENST00000378197.4	0.785992	403	-110	-111	-962	-963	-1053	513	851	90
chr10	18940143	NSUN6	ENST00000377304.4	0.976134	408	-10	-11	-1420	-1421	-1792	418	1409	371
chr10	22610571	BMI1	ENST00000376663.3	0.855446	431	-73	-74	-1054	-1055	-2996	504	980	1941
chr10	28821828	WAC	ENST00000375646.1	0.36478	115	-202	-203	-1690	-1691	-2060	317	1487	369
chr10	28824539	WAC	ENST00000375646.1	0.974843	309	-8	-9	-1496	-1497	-1866	317	1487	369
chr10	44141605	ZNF32	ENST00000374433.2	0.814516	100	-23	-24	-845	-846	-1036	123	821	190
chr10	45498787	ZNF22	ENST00000298299.3	0.951096	563	-29	-30	-704	-705	-1987	592	674	1282
chr10	45498795	ZNF22	ENST00000298299.3	0.964587	571	-21	-22	-696	-697	-1979	592	674	1282
chr10	46159180	ZFAND4	ENST00000335258.7	0.972603	212	-6	-7	-354	-355	-1835	218	347	1480
chr10	75008074	DNAJC9	ENST00000372950.4	0.326958	546	-1126	-1127	-1909	-1910	-2485	1672	782	575
chr10	76602461	KAT6B	ENST00000287239.4	0.685072	334	-154	-155	-6376	-6377	-7952	488	6221	1575
chr10	76602508	KAT6B	ENST00000287239.4	0.781186	381	-107	-108	-6329	-6330	-7905	488	6221	1575
chr10	76602540	KAT6B	ENST00000287239.4	0.846626	413	-75	-76	-6297	-6298	-7873	488	6221	1575
chr10	76602564	KAT6B	ENST00000287239.4	0.895706	437	-51	-52	-6273	-6274	-7849	488	6221	1575
chr10	88635747	BMPR1A	ENST00000372037.3	0.947858	508	-28	-29	-1627	-1628	-10746	536	1598	9118
chr10	89577574	ATAD1	ENST00000308448.7	0.907652	343	-35	-36	-1121	-1122	-4296	378	1085	3174
chr10	89577666	ATAD1	ENST00000308448.7	0.664908	251	-127	-128	-1213	-1214	-4388	378	1085	3174
chr10	89577714	ATAD1	ENST00000308448.7	0.538259	203	-175	-176	-1261	-1262	-4436	378	1085	3174
chr10	92982577	PCGF5	ENST00000336126.5	0.780172	180	-51	-52	-822	-823	-6837	231	770	6014
chr10	92982603	PCGF5	ENST00000336126.5	0.892241	206	-25	-26	-796	-797	-6811	231	770	6014
chr10	96122611	NOC3L	ENST00000371361.3	0.851485	85	-15	-16	-2418	-2419	-3369	100	2402	950
chr10	98592149	LCOR	ENST00000371103.3	0.213052	110	-410	-411	-1712	-1713	-4723	520	1301	3010
chr10	98703930	LCOR	ENST00000371103.3	0.765835	398	-122	-123	-1424	-1425	-4435	520	1301	3010
chr10	98703956	LCOR	ENST00000371103.3	0.815739	424	-96	-97	-1398	-1399	-4409	520	1301	3010
chr10	98703963	LCOR	ENST00000371103.3	0.829175	431	-89	-90	-1391	-1392	-4402	520	1301	3010
chr10	103347122	POLL	ENST00000299206.4	0.989218	366	-4	-5	-1732	-1733	-2303	370	1727	570
chr10	112064566	SMNDC1	ENST00000369603.5	0.705882	143	-60	-61	-777	-778	-4197	203	716	3419
chr10	112724009	SHOC2	ENST00000265277.5	0.69341	241	-107	-108	-1718	-1719	-3564	348	1610	1845
chr10	112724115	SHOC2	ENST00000265277.5	0.997135	347	-1	-2	-1612	-1613	-3458	348	1610	1845
chr10	114205283	ZDHHC6	ENST00000369405.3	0.792453	335	-88	-89	-1330	-1331	-1834	423	1241	503
chr10	115439021	CASP7	ENST00000369331.4	0.40411	58	-87	-88	-849	-850	-2321	145	761	1471
chr10	115612965	DCLRE1A	ENST00000361384.2	0.974946	894	-23	-24	-3146	-3147	-3569	917	3122	422
chr10	115612968	DCLRE1A	ENST00000361384.2	0.971678	891	-26	-27	-3149	-3150	-3572	917	3122	422
chr10	115612981	DCLRE1A	ENST00000361384.2	0.957516	878	-39	-40	-3162	-3163	-3585	917	3122	422
chr10	115613003	DCLRE1A	ENST00000361384.2	0.933551	856	-61	-62	-3184	-3185	-3607	917	3122	422
chr10	115613017	DCLRE1A	ENST00000361384.2	0.918301	842	-75	-76	-3198	-3199	-3621	917	3122	422
chr10	115613023	DCLRE1A	ENST00000361384.2	0.911765	836	-81	-82	-3204	-3205	-3627	917	3122	422
chr10	115613036	DCLRE1A	ENST00000361384.2	0.897603	823	-94	-95	-3217	-3218	-3640	917	3122	422
chr10	115613038	DCLRE1A	ENST00000361384.2	0.895425	821	-96	-97	-3219	-3220	-3642	917	3122	422
chr10	115613052	DCLRE1A	ENST00000361384.2	0.880174	807	-110	-111	-3233	-3234	-3656	917	3122	422
chr10	115613099	DCLRE1A	ENST00000361384.2	0.828976	760	-157	-158	-3280	-3281	-3703	917	3122	422
chr10	115613257	DCLRE1A	ENST00000361384.2	0.656863	602	-315	-316	-3438	-3439	-3861	917	3122	422
chr10	115613331	DCLRE1A	ENST00000361384.2	0.576253	528	-389	-390	-3512	-3513	-3935	917	3122	422
chr10	115613344	DCLRE1A	ENST00000361384.2	0.562092	515	-402	-403	-3525	-3526	-3948	917	3122	422
chr10	115613487	DCLRE1A	ENST00000361384.2	0.406318	372	-545	-546	-3668	-3669	-4091	917	3122	422
chr10	120514414	CACUL1	ENST00000369151.3	0.71281	344	-139	-140	-1249	-1250	-6388	483	1109	5138
chr10	120840232	EIF3A	ENST00000369144.3	0.664062	84	-43	-44	-4192	-4193	-5387	127	4148	1194
chr10	124758168	IKZF5	ENST00000368886.5	0.919003	294	-26	-27	-1286	-1287	-4260	320	1259	2973
chr10	127569450	DHX32	ENST00000284688.6	0.885947	434	-56	-57	-2045	-2046	-2392	490	1988	346
chr10	129923946	MKI67	ENST00000368653.3	0.928205	180	-14	-15	-8705	-8706	-11236	194	8690	2530
chr10	133753609	PPP2R2D	ENST00000422256.2	0.158763	76	-408	-409	-816	-817	-1637	484	407	820
chr10	133753692	PPP2R2D	ENST00000422256.2	0.329897	159	-325	-326	-733	-734	-1554	484	407	820
chr10	133757603	PPP2R2D	ENST00000422256.2	0.851546	412	-72	-73	-480	-481	-1301	484	407	820
chr11	6953452	ZNF215	ENST00000278319.5	0.913265	536	-51	-52	-1605	-1606	-2911	587	1553	1305
chr11	14541885	PSMA1	ENST00000419365.2	0.133333	5	-39	-40	-534	-535	-1215	44	494	680
chr11	14912828	CYP2R1	ENST00000532378.1	0.432749	369	-485	-486	-1292	-1293	-1376	854	806	83
chr11	14912963	CYP2R1	ENST00000532378.1	0.274854	234	-620	-621	-1427	-1428	-1511	854	806	83
chr11	17304388	NUCB2	ENST00000323688.6	0.580247	140	-102	-103	-1365	-1366	-1764	242	1262	398
chr11	17304433	NUCB2	ENST00000323688.6	0.765432	185	-57	-58	-1320	-1321	-1719	242	1262	398
chr11	17304450	NUCB2	ENST00000323688.6	0.835391	202	-40	-41	-1303	-1304	-1702	242	1262	398
chr11	19167833	ZDHHC13	ENST00000399351.3	0.681948	237	-111	-112	-1590	-1591	-2045	348	1478	454
chr11	19167837	ZDHHC13	ENST00000399351.3	0.69341	241	-107	-108	-1586	-1587	-2041	348	1478	454
chr11	20385745	HTATIP2	ENST00000451739.2	0.913832	402	-38	-39	-767	-768	-1345	440	728	577
chr11	20385755	HTATIP2	ENST00000451739.2	0.936508	412	-28	-29	-757	-758	-1335	440	728	577
chr11	27015975	FIBIN	ENST00000318627.2	0.780269	347	-98	-99	-734	-735	-2655	445	635	1920
chr11	32851557	PRRG4	ENST00000257836.3	0.272727	68	-184	-185	-865	-866	-5461	252	680	4595
chr11	43702348	HSD17B12	ENST00000278353.4	0.756303	89	-29	-30	-968	-969	-2330	118	938	1361
chr11	57439608	ZDHHC5	ENST00000287169.3	0.299559	407	-954	-955	-3102	-3103	-4258	1361	2147	1155
chr11	57439615	ZDHHC5	ENST00000287169.3	0.304699	414	-947	-948	-3095	-3096	-4251	1361	2147	1155
chr11	57439945	ZDHHC5	ENST00000287169.3	0.54699	744	-617	-618	-2765	-2766	-3921	1361	2147	1155
chr11	57440090	ZDHHC5	ENST00000287169.3	0.653451	889	-472	-473	-2620	-2621	-3776	1361	2147	1155
chr11	57440177	ZDHHC5	ENST00000287169.3	0.717327	976	-385	-386	-2533	-2534	-3689	1361	2147	1155
chr11	57440287	ZDHHC5	ENST00000287169.3	0.798091	1086	-275	-276	-2423	-2424	-3579	1361	2147	1155
chr11	61734973	FTH1	ENST00000273550.7	0.680851	159	-75	-76	-627	-628	-1069	234	551	441
chr11	62496275	TTC9C	ENST00000316461.4	0.854839	264	-45	-46	-561	-562	-815	309	515	253
chr11	64009546	FKBP2	ENST00000394540.3	0.695745	326	-143	-144	-572	-573	-675	469	428	102
chr11	67957575	SUV420H1	ENST00000304363.4	0.912429	322	-31	-32	-2689	-2690	-5514	353	2657	2824
chr11	82642917	C11orf82	ENST00000329143.3	0.456166	306	-366	-367	-2460	-2461	-2780	672	2093	319
chr11	82642930	C11orf82	ENST00000329143.3	0.475483	319	-353	-354	-2447	-2448	-2767	672	2093	319
chr11	82642968	C11orf82	ENST00000329143.3	0.531947	357	-315	-316	-2409	-2410	-2729	672	2093	319
chr11	82643043	C11orf82	ENST00000329143.3	0.643388	432	-240	-241	-2334	-2335	-2654	672	2093	319
chr11	82643051	C11orf82	ENST00000329143.3	0.655275	440	-232	-233	-2326	-2327	-2646	672	2093	319
chr11	82643199	C11orf82	ENST00000329143.3	0.875186	588	-84	-85	-2178	-2179	-2498	672	2093	319
chr11	89939172	CHORDC1	ENST00000529726.1	0.887839	3474	-439	-440	-874	-875	-1330	3913	434	455
chr11	93474584	TAF1D	ENST00000448108.2	0.81106	527	-123	-124	-960	-961	-1554	650	836	593
chr11	94707031	KDM4D	ENST00000335080.5	0.22476	186	-645	-646	-2217	-2218	-2791	831	1571	573
chr11	94707095	KDM4D	ENST00000335080.5	0.301683	250	-581	-582	-2153	-2154	-2727	831	1571	573
chr11	94707173	KDM4D	ENST00000335080.5	0.395433	328	-503	-504	-2075	-2076	-2649	831	1571	573
chr11	94730503	KDM4D	ENST00000335080.5	0.960337	798	-33	-34	-1605	-1606	-2179	831	1571	573
chr11	94730507	KDM4D	ENST00000335080.5	0.965144	802	-29	-30	-1601	-1602	-2175	831	1571	573
chr11	102219889	BIRC2	ENST00000227758.2	0.502502	702	-696	-697	-2553	-2554	-3040	1398	1856	486
chr11	102219919	BIRC2	ENST00000227758.2	0.523946	732	-666	-667	-2523	-2524	-3010	1398	1856	486
chr11	102219938	BIRC2	ENST00000227758.2	0.537527	751	-647	-648	-2504	-2505	-2991	1398	1856	486
chr11	102220090	BIRC2	ENST00000227758.2	0.646176	903	-495	-496	-2352	-2353	-2839	1398	1856	486
chr11	102220136	BIRC2	ENST00000227758.2	0.679056	949	-449	-450	-2306	-2307	-2793	1398	1856	486
chr11	102220255	BIRC2	ENST00000227758.2	0.764117	1068	-330	-331	-2187	-2188	-2674	1398	1856	486
chr11	102220414	BIRC2	ENST00000227758.2	0.87777	1227	-171	-172	-2028	-2029	-2515	1398	1856	486
chr11	102220544	BIRC2	ENST00000227758.2	0.970693	1357	-41	-42	-1898	-1899	-2385	1398	1856	486
chr11	105881670	MSANTD4	ENST00000301919.4	0.982345	1390	-25	-26	-1063	-1064	-2696	1415	1037	1632
chr11	105892769	MSANTD4	ENST00000301919.4	0.131356	185	-1230	-1231	-2268	-2269	-3901	1415	1037	1632
chr11	114271080	C11orf71	ENST00000325636.4	0.697674	59	-26	-27	-470	-471	-592	85	443	121
chr11	118657010	DDX6	ENST00000264018.4	0.839869	256	-49	-50	-1501	-1502	-4281	305	1451	2779
chr11	118657013	DDX6	ENST00000264018.4	0.830065	253	-52	-53	-1504	-1505	-4284	305	1451	2779
chr11	118657067	DDX6	ENST00000264018.4	0.653595	199	-106	-107	-1558	-1559	-4338	305	1451	2779
chr11	118657114	DDX6	ENST00000264018.4	0.5	152	-153	-154	-1605	-1606	-4385	305	1451	2779
chr11	118657124	DDX6	ENST00000264018.4	0.46732	142	-163	-164	-1615	-1616	-4395	305	1451	2779
chr11	118900081	SLC37A4	ENST00000330775.7	0.995192	206	-1	-2	-1354	-1355	-1908	207	1352	553
chr11	119205601	RNF26	ENST00000311413.4	0.612416	364	-231	-232	-1533	-1534	-2422	595	1301	888
chr11	119205612	RNF26	ENST00000311413.4	0.630872	375	-220	-221	-1522	-1523	-2411	595	1301	888
chr11	119205631	RNF26	ENST00000311413.4	0.662752	394	-201	-202	-1503	-1504	-2392	595	1301	888
chr11	119205637	RNF26	ENST00000311413.4	0.672819	400	-195	-196	-1497	-1498	-2386	595	1301	888
chr11	119205657	RNF26	ENST00000311413.4	0.706376	420	-175	-176	-1477	-1478	-2366	595	1301	888
chr11	119205663	RNF26	ENST00000311413.4	0.716443	426	-169	-170	-1471	-1472	-2360	595	1301	888
chr11	119205668	RNF26	ENST00000311413.4	0.724832	431	-164	-165	-1466	-1467	-2355	595	1301	888
chr11	119205675	RNF26	ENST00000311413.4	0.736577	438	-157	-158	-1459	-1460	-2348	595	1301	888
chr11	119205679	RNF26	ENST00000311413.4	0.743289	442	-153	-154	-1455	-1456	-2344	595	1301	888
chr11	119205686	RNF26	ENST00000311413.4	0.755034	449	-146	-147	-1448	-1449	-2337	595	1301	888
chr11	119205726	RNF26	ENST00000311413.4	0.822148	489	-106	-107	-1408	-1409	-2297	595	1301	888
chr11	119205752	RNF26	ENST00000311413.4	0.865772	515	-80	-81	-1382	-1383	-2271	595	1301	888
chr11	119205768	RNF26	ENST00000311413.4	0.892617	531	-64	-65	-1366	-1367	-2255	595	1301	888
chr11	119205780	RNF26	ENST00000311413.4	0.912752	543	-52	-53	-1354	-1355	-2243	595	1301	888
chr11	119205817	RNF26	ENST00000311413.4	0.974832	580	-15	-16	-1317	-1318	-2206	595	1301	888
chr11	120198079	TMEM136	ENST00000314475.2	0.984709	321	-5	-6	-809	-810	-1112	326	803	302
chr11	120198081	TMEM136	ENST00000314475.2	0.990826	323	-3	-4	-807	-808	-1110	326	803	302
chr11	120207799	ARHGEF12	ENST00000397843.2	0.0783133	12	-153	-154	-4788	-4789	-9647	165	4634	4858
chr11	120207811	ARHGEF12	ENST00000397843.2	0.150602	24	-141	-142	-4776	-4777	-9635	165	4634	4858
chr11	120207856	ARHGEF12	ENST00000397843.2	0.421687	69	-96	-97	-4731	-4732	-9590	165	4634	4858
chr11	120207904	ARHGEF12	ENST00000397843.2	0.710843	117	-48	-49	-4683	-4684	-9542	165	4634	4858
chr11	124495644	TBRG1	ENST00000375005.4	0.966203	485	-17	-18	-800	-801	-997	502	782	196
chr12	2994517	RHNO1	ENST00000461997.2	0.910714	152	-15	-16	-690	-691	-1502	167	674	811
chr12	4383117	CCND2	ENST00000261254.3	0.669145	179	-89	-90	-959	-960	-6300	268	869	5340
chr12	4430423	C12orf5	ENST00000179259.4	0.791045	52	-14	-15	-827	-828	-1308	66	812	480
chr12	12674201	DUSP16	ENST00000228862.2	0.734177	463	-168	-169	-2166	-2167	-3104	631	1997	937
chr12	14518658	ATF7IP	ENST00000261168.4	0.281046	42	-110	-111	-3923	-3924	-4613	152	3812	689
chr12	14956351	WBP11	ENST00000261167.2	0.529915	123	-110	-111	-2036	-2037	-2625	233	1925	588
chr12	21926557	KCNJ8	ENST00000240662.2	0.982659	339	-6	-7	-1281	-1282	-2049	345	1274	767
chr12	32123256	KIAA1551	ENST00000312561.4	0.729469	301	-112	-113	-5356	-5357	-5926	413	5243	569
chr12	46384197	SCAF11	ENST00000369367.3	0.649573	151	-82	-83	-4474	-4475	-5113	233	4391	638
chr12	46633634	SLC38A1	ENST00000398637.5	0.928058	644	-50	-51	-1514	-1515	-7421	694	1463	5906
chr12	46637001	SLC38A1	ENST00000398637.5	0.840288	583	-111	-112	-1575	-1576	-7482	694	1463	5906
chr12	46637003	SLC38A1	ENST00000398637.5	0.83741	581	-113	-114	-1577	-1578	-7484	694	1463	5906
chr12	46662383	SLC38A1	ENST00000398637.5	0.594245	412	-282	-283	-1746	-1747	-7653	694	1463	5906
chr12	46662399	SLC38A1	ENST00000398637.5	0.571223	396	-298	-299	-1762	-1763	-7669	694	1463	5906
chr12	46765108	SLC38A2	ENST00000256689.5	0.930337	413	-31	-32	-1552	-1553	-4474	444	1520	2921
chr12	46766319	SLC38A2	ENST00000256689.5	0.746067	331	-113	-114	-1634	-1635	-4556	444	1520	2921
chr12	46766326	SLC38A2	ENST00000256689.5	0.730337	324	-120	-121	-1641	-1642	-4563	444	1520	2921
chr12	46766340	SLC38A2	ENST00000256689.5	0.698876	310	-134	-135	-1655	-1656	-4577	444	1520	2921
chr12	46766462	SLC38A2	ENST00000256689.5	0.424719	188	-256	-257	-1777	-1778	-4699	444	1520	2921
chr12	49761321	SPATS2	ENST00000321898.6	0.179775	63	-292	-293	-1930	-1931	-3094	355	1637	1163
chr12	49854659	SPATS2	ENST00000321898.6	0.617978	219	-136	-137	-1774	-1775	-2938	355	1637	1163
chr12	49854688	SPATS2	ENST00000321898.6	0.699438	248	-107	-108	-1745	-1746	-2909	355	1637	1163
chr12	49854744	SPATS2	ENST00000321898.6	0.856742	304	-51	-52	-1689	-1690	-2853	355	1637	1163
chr12	49854794	SPATS2	ENST00000321898.6	0.997191	354	-1	-2	-1639	-1640	-2803	355	1637	1163
chr12	53646018	MFSD5	ENST00000329548.4	0.727749	138	-52	-53	-1405	-1406	-1621	190	1352	215
chr12	53689322	PFDN5	ENST00000351500.3	0.325581	13	-29	-30	-359	-360	-464	42	329	104
chr12	56510482	RPL41	ENST00000546591.1	0.559406	112	-89	-90	-167	-168	-586	201	77	418
chr12	64238291	SRGAP1	ENST00000355086.3	0.417939	218	-305	-306	-3563	-3564	-8724	523	3257	5160
chr12	69140136	SLC35E3	ENST00000398004.2	0.922794	250	-21	-22	-963	-964	-4763	271	941	3799
chr12	72080408	TMEM19	ENST00000266673.5	0.912458	541	-52	-53	-1063	-1064	-4124	593	1010	3060
chr12	72080410	TMEM19	ENST00000266673.5	0.915825	543	-50	-51	-1061	-1062	-4122	593	1010	3060
chr12	72080418	TMEM19	ENST00000266673.5	0.929293	551	-42	-43	-1053	-1054	-4114	593	1010	3060
chr12	85285906	SLC6A15	ENST00000266682.5	0.98893	535	-6	-7	-2199	-2200	-3508	541	2192	1308
chr12	85285912	SLC6A15	ENST00000266682.5	0.97786	529	-12	-13	-2205	-2206	-3514	541	2192	1308
chr12	85285915	SLC6A15	ENST00000266682.5	0.972325	526	-15	-16	-2208	-2209	-3517	541	2192	1308
chr12	85285954	SLC6A15	ENST00000266682.5	0.900369	487	-54	-55	-2247	-2248	-3556	541	2192	1308
chr12	85286004	SLC6A15	ENST00000266682.5	0.808118	437	-104	-105	-2297	-2298	-3606	541	2192	1308
chr12	85306342	SLC6A15	ENST00000266682.5	0.579336	313	-228	-229	-2421	-2422	-3730	541	2192	1308
chr12	88536185	TMTC3	ENST00000266712.6	0.513636	112	-107	-108	-2852	-2853	-7090	219	2744	4237
chr12	90049753	ATP2B1	ENST00000261173.2	0.508287	91	-89	-90	-3752	-3753	-6685	180	3662	2932
chr12	95928050	USP44	ENST00000258499.3	0.941176	271	-17	-18	-2156	-2157	-3750	288	2138	1593
chr12	97301535	NEDD1	ENST00000266742.4	0.684366	231	-107	-108	-2090	-2091	-3388	338	1982	1297
chr12	100994246	GAS2L3	ENST00000537247.1	0.514675	490	-463	-464	-2236	-2237	-2251	953	1772	14
chr12	102517810	PARPBP	ENST00000327680.2	0.552916	255	-207	-208	-1704	-1705	-2933	462	1496	1228
chr12	102542024	PARPBP	ENST00000327680.2	0.842333	389	-73	-74	-1570	-1571	-2799	462	1496	1228
chr12	102542086	PARPBP	ENST00000327680.2	0.976242	451	-11	-12	-1508	-1509	-2737	462	1496	1228
chr12	104681103	TXNRD1	ENST00000354940.6	0.868664	376	-57	-58	-1551	-1552	-3413	433	1493	1861
chr12	108154467	PRDM4	ENST00000228437.5	0.621739	285	-174	-175	-2580	-2581	-3924	459	2405	1343
chr12	109536101	UNG	ENST00000336865.2	0.856459	178	-30	-31	-945	-946	-1951	208	914	1005
chr12	110006584	MMAB	ENST00000266839.5	0.671806	304	-149	-150	-629	-630	-869	453	479	239
chr12	110006602	MMAB	ENST00000266839.5	0.632159	286	-167	-168	-647	-648	-887	453	479	239
chr12	111066629	TCTN1	ENST00000377654.3	0.993103	575	-4	-5	-787	-788	-1091	579	782	303
chr12	113624010	C12orf52	ENST00000548278.1	0.74711	516	-175	-176	-985	-986	-1536	691	809	550
chr12	113624017	C12orf52	ENST00000548278.1	0.757225	523	-168	-169	-978	-979	-1529	691	809	550
chr12	113624063	C12orf52	ENST00000548278.1	0.823699	569	-122	-123	-932	-933	-1483	691	809	550
chr12	113624095	C12orf52	ENST00000548278.1	0.869942	601	-90	-91	-900	-901	-1451	691	809	550
chr12	118455776	RFC5	ENST00000392542.2	0.849906	452	-80	-81	-1040	-1041	-1989	532	959	948
chr12	118693381	TAOK3	ENST00000392533.3	0.983707	482	-8	-9	-2705	-2706	-3901	490	2696	1195
chr12	120907806	DYNLL1	ENST00000392509.2	0.590038	153	-107	-108	-377	-378	-660	260	269	282
chr12	122865007	CLIP1	ENST00000302528.7	0.935185	100	-7	-8	-4291	-4292	-5732	107	4283	1440
chr12	122865011	CLIP1	ENST00000302528.7	0.898148	96	-11	-12	-4295	-4296	-5736	107	4283	1440
chr12	122865015	CLIP1	ENST00000302528.7	0.861111	92	-15	-16	-4299	-4300	-5740	107	4283	1440
chr12	122865020	CLIP1	ENST00000302528.7	0.814815	87	-20	-21	-4304	-4305	-5745	107	4283	1440
chr12	122985445	ZCCHC8	ENST00000336229.4	0.564885	73	-57	-58	-2181	-2182	-2788	130	2123	606
chr12	124496232	ZNF664	ENST00000337815.4	0.516333	489	-459	-460	-1245	-1246	-3737	948	785	2491
chr12	124496332	ZNF664	ENST00000337815.4	0.621707	589	-359	-360	-1145	-1146	-3637	948	785	2491
chr12	124496399	ZNF664	ENST00000337815.4	0.692308	656	-292	-293	-1078	-1079	-3570	948	785	2491
chr12	124496416	ZNF664	ENST00000337815.4	0.710221	673	-275	-276	-1061	-1062	-3553	948	785	2491
chr12	124496465	ZNF664	ENST00000337815.4	0.761855	722	-226	-227	-1012	-1013	-3504	948	785	2491
chr12	124496564	ZNF664	ENST00000337815.4	0.866175	821	-127	-128	-913	-914	-3405	948	785	2491
chr12	124496637	ZNF664	ENST00000337815.4	0.943098	894	-54	-55	-840	-841	-3332	948	785	2491
chr12	124496679	ZNF664	ENST00000337815.4	0.987355	936	-12	-13	-798	-799	-3290	948	785	2491
chr13	22245858	FGF9	ENST00000382353.5	0.635849	336	-193	-194	-820	-821	-3883	529	626	3062
chr13	22245952	FGF9	ENST00000382353.5	0.813208	430	-99	-100	-726	-727	-3789	529	626	3062
chr13	22246049	FGF9	ENST00000382353.5	0.996226	527	-2	-3	-629	-630	-3692	529	626	3062
chr13	27825974	RPL21	ENST00000319826.4	0.910714	254	-25	-26	-508	-509	-551	279	482	42
chr13	28195091	POLR1D	ENST00000302979.3	0.184932	188	-833	-834	-1235	-1236	-1437	1021	401	201
chr13	31195255	USPL1	ENST00000255304.4	0.935673	319	-22	-23	-3301	-3302	-3494	341	3278	192
chr13	39611410	PROSER1	ENST00000350125.3	0.965636	842	-30	-31	-2799	-2800	-4298	872	2768	1498
chr13	39611506	PROSER1	ENST00000350125.3	0.85567	746	-126	-127	-2895	-2896	-4394	872	2768	1498
chr13	39611563	PROSER1	ENST00000350125.3	0.790378	689	-183	-184	-2952	-2953	-4451	872	2768	1498
chr13	39612683	NHLRC3	ENST00000379599.2	0.626506	155	-93	-94	-936	-937	-3119	248	842	2182
chr13	40175374	LHFP	ENST00000379589.3	0.956803	442	-20	-21	-623	-624	-1667	462	602	1043
chr13	40175385	LHFP	ENST00000379589.3	0.933045	431	-31	-32	-634	-635	-1678	462	602	1043
chr13	40175408	LHFP	ENST00000379589.3	0.883369	408	-54	-55	-657	-658	-1701	462	602	1043
chr13	40175414	LHFP	ENST00000379589.3	0.87041	402	-60	-61	-663	-664	-1707	462	602	1043
chr13	40175422	LHFP	ENST00000379589.3	0.853132	394	-68	-69	-671	-672	-1715	462	602	1043
chr13	49550307	FNDC3A	ENST00000492622.2	0.852459	259	-45	-46	-3642	-3643	-6026	304	3596	2383
chr13	51484060	RNASEH2B	ENST00000336617.3	0.619048	246	-152	-153	-1091	-1092	-1382	398	938	290
chr13	52602614	UTP14C	ENST00000521776.2	0.555252	406	-326	-327	-2627	-2628	-5122	732	2300	2494
chr13	52602704	UTP14C	ENST00000521776.2	0.678035	496	-236	-237	-2537	-2538	-5032	732	2300	2494
chr13	52602729	UTP14C	ENST00000521776.2	0.712142	521	-211	-212	-2512	-2513	-5007	732	2300	2494
chr13	52602772	UTP14C	ENST00000521776.2	0.770805	564	-168	-169	-2469	-2470	-4964	732	2300	2494
chr13	52602815	UTP14C	ENST00000521776.2	0.829468	607	-125	-126	-2426	-2427	-4921	732	2300	2494
chr13	52602827	UTP14C	ENST00000521776.2	0.845839	619	-113	-114	-2414	-2415	-4909	732	2300	2494
chr13	52602837	UTP14C	ENST00000521776.2	0.859482	629	-103	-104	-2404	-2405	-4899	732	2300	2494
chr13	52602841	UTP14C	ENST00000521776.2	0.864939	633	-99	-100	-2400	-2401	-4895	732	2300	2494
chr13	52602890	UTP14C	ENST00000521776.2	0.931787	682	-50	-51	-2351	-2352	-4846	732	2300	2494
chr13	67802651	PCDH9	ENST00000377865.2	0.422222	56	-78	-79	-3792	-3793	-5610	134	3713	1817
chr13	78293756	SLAIN1	ENST00000267219.8	0.774194	23	-7	-8	-1057	-1058	-2066	30	1049	1008
chr13	79233262	RNF219	ENST00000282003.6	0.898305	52	-6	-7	-2187	-2188	-3476	58	2180	1288
chr13	97928250	MBNL2	ENST00000343600.4	0.707108	576	-239	-240	-1325	-1326	-3995	815	1085	2669
chr13	97928252	MBNL2	ENST00000343600.4	0.709559	578	-237	-238	-1323	-1324	-3993	815	1085	2669
chr13	97928325	MBNL2	ENST00000343600.4	0.79902	651	-164	-165	-1250	-1251	-3920	815	1085	2669
chr13	97928345	MBNL2	ENST00000343600.4	0.823529	671	-144	-145	-1230	-1231	-3900	815	1085	2669
chr13	97928362	MBNL2	ENST00000343600.4	0.844363	688	-127	-128	-1213	-1214	-3883	815	1085	2669
chr13	97928377	MBNL2	ENST00000343600.4	0.862745	703	-112	-113	-1198	-1199	-3868	815	1085	2669
chr13	97928381	MBNL2	ENST00000343600.4	0.867647	707	-108	-109	-1194	-1195	-3864	815	1085	2669
chr13	97928385	MBNL2	ENST00000343600.4	0.872549	711	-104	-105	-1190	-1191	-3860	815	1085	2669
chr13	97928389	MBNL2	ENST00000343600.4	0.877451	715	-100	-101	-1186	-1187	-3856	815	1085	2669
chr13	97928393	MBNL2	ENST00000343600.4	0.882353	719	-96	-97	-1182	-1183	-3852	815	1085	2669
chr13	97928409	MBNL2	ENST00000343600.4	0.901961	735	-80	-81	-1166	-1167	-3836	815	1085	2669
chr13	97928412	MBNL2	ENST00000343600.4	0.905637	738	-77	-78	-1163	-1164	-3833	815	1085	2669
chr13	97928435	MBNL2	ENST00000343600.4	0.933824	761	-54	-55	-1140	-1141	-3810	815	1085	2669
chr13	103451644	BIVM	ENST00000257336.1	0.362297	245	-433	-434	-1945	-1946	-3611	678	1511	1665
chr13	103459609	BIVM	ENST00000257336.1	0.988218	670	-8	-9	-1520	-1521	-3186	678	1511	1665
chr14	20793705	CCNB1IP1	ENST00000353689.4	0.84	230	-44	-45	-878	-879	-1057	274	833	178
chr14	20923486	APEX1	ENST00000216714.3	0.496269	132	-135	-136	-1092	-1093	-1351	267	956	258
chr14	23564445	C14orf119	ENST00000319074.4	0.551402	471	-384	-385	-807	-808	-3182	855	422	2374
chr14	23564795	C14orf119	ENST00000319074.4	0.96028	821	-34	-35	-457	-458	-2832	855	422	2374
chr14	24025840	THTPA	ENST00000288014.6	0.828804	609	-126	-127	-819	-820	-2250	735	692	1430
chr14	24025892	THTPA	ENST00000288014.6	0.899457	661	-74	-75	-767	-768	-2198	735	692	1430
chr14	24664662	TM9SF1	ENST00000261789.4	0.64624	231	-127	-128	-1948	-1949	-2220	358	1820	271
chr14	24740399	RABGGTA	ENST00000399409.3	0.840909	406	-77	-78	-1781	-1782	-1858	483	1703	76
chr14	32559819	ARHGAP5	ENST00000345122.3	0.822222	258	-56	-57	-4565	-4566	-9345	314	4508	4779
chr14	32559861	ARHGAP5	ENST00000345122.3	0.955556	300	-14	-15	-4523	-4524	-9303	314	4508	4779
chr14	35591519	PPP2R3C	ENST00000261475.5	0.00282486	0	-353	-354	-1715	-1716	-1838	353	1361	122
chr14	35592328	KIAA0391	ENST00000250377.7	0.374233	243	-408	-409	-1875	-1876	-2371	651	1466	495
chr14	35592593	KIAA0391	ENST00000250377.7	0.780675	508	-143	-144	-1610	-1611	-2106	651	1466	495
chr14	53197032	STYX	ENST00000354586.4	0.453925	132	-160	-161	-832	-833	-4724	292	671	3891
chr14	54423401	BMP4	ENST00000245451.4	0.327411	128	-265	-266	-1492	-1493	-1788	393	1226	295
chr14	56068519	KTN1	ENST00000395308.1	0.410811	75	-109	-110	-4030	-4031	-4058	184	3920	27
chr14	56078751	KTN1	ENST00000395308.1	0.918919	169	-15	-16	-3936	-3937	-3964	184	3920	27
chr14	57735993	AP5M1	ENST00000261558.3	0.903941	366	-39	-40	-1512	-1513	-2707	405	1472	1194
chr14	57736022	AP5M1	ENST00000261558.3	0.975369	395	-10	-11	-1483	-1484	-2678	405	1472	1194
chr14	58893832	TIMM9	ENST00000395159.2	0.669202	351	-174	-175	-444	-445	-984	525	269	539
chr14	58894931	KIAA0586	ENST00000261244.5	0.814545	223	-51	-52	-4470	-4471	-4583	274	4418	112
chr14	60559116	PCNXL4	ENST00000317623.4	0.934866	487	-34	-35	-2851	-2852	-3444	521	2816	592
chr14	73525310	RBM25	ENST00000261973.7	0.585965	166	-118	-119	-2650	-2651	-4259	284	2531	1608
chr14	73525329	RBM25	ENST00000261973.7	0.652632	185	-99	-100	-2631	-2632	-4240	284	2531	1608
chr14	74153989	DNAL1	ENST00000311089.3	0.819231	212	-47	-48	-281	-282	-2099	259	233	1817
chr14	74180432	PNMA1	ENST00000316836.3	0.886768	696	-89	-90	-1151	-1152	-1938	785	1061	786
chr14	74180512	PNMA1	ENST00000316836.3	0.784987	616	-169	-170	-1231	-1232	-2018	785	1061	786
chr14	74358839	ZNF410	ENST00000324593.6	0.85	220	-39	-40	-1335	-1336	-2072	259	1295	736
chr14	77229033	VASH1	ENST00000167106.4	0.793049	501	-131	-132	-1229	-1230	-5222	632	1097	3992
chr14	77229053	VASH1	ENST00000167106.4	0.824645	521	-111	-112	-1209	-1210	-5202	632	1097	3992
chr14	77229070	VASH1	ENST00000167106.4	0.851501	538	-94	-95	-1192	-1193	-5185	632	1097	3992
chr14	77229089	VASH1	ENST00000167106.4	0.881517	557	-75	-76	-1173	-1174	-5166	632	1097	3992
chr14	90863412	CALM1	ENST00000356978.4	0.346774	85	-162	-163	-612	-613	-4156	247	449	3543
chr14	90863457	CALM1	ENST00000356978.4	0.528226	130	-117	-118	-567	-568	-4111	247	449	3543
chr14	92506038	TRIP11	ENST00000267622.4	0.97861	365	-8	-9	-5948	-5949	-9630	373	5939	3681
chr14	92506055	TRIP11	ENST00000267622.4	0.933155	348	-25	-26	-5965	-5966	-9647	373	5939	3681
chr14	92506191	TRIP11	ENST00000267622.4	0.569519	212	-161	-162	-6101	-6102	-9783	373	5939	3681
chr14	92506239	TRIP11	ENST00000267622.4	0.441176	164	-209	-210	-6149	-6150	-9831	373	5939	3681
chr14	95623596	DICER1	ENST00000343455.3	0.689076	163	-74	-75	-5843	-5844	-10113	237	5768	4269
chr14	96553297	C14orf132	ENST00000555004.1	0.154318	653	-3584	-3585	-4106	-4107	-7120	4237	521	3013
chr14	96553388	C14orf132	ENST00000555004.1	0.17579	744	-3493	-3494	-4015	-4016	-7029	4237	521	3013
chr14	96553576	C14orf132	ENST00000555004.1	0.220151	932	-3305	-3306	-3827	-3828	-6841	4237	521	3013
chr14	96554454	C14orf132	ENST00000555004.1	0.427324	1810	-2427	-2428	-2949	-2950	-5963	4237	521	3013
chr14	96556056	C14orf132	ENST00000555004.1	0.805333	3412	-825	-826	-1347	-1348	-4361	4237	521	3013
chr14	103802027	EIF5	ENST00000216554.3	0.748521	505	-170	-171	-1466	-1467	-5439	675	1295	3972
chr14	103802120	EIF5	ENST00000216554.3	0.886095	598	-77	-78	-1373	-1374	-5346	675	1295	3972
chr14	103802185	EIF5	ENST00000216554.3	0.982249	663	-12	-13	-1308	-1309	-5281	675	1295	3972
chr14	103852284	MARK3	ENST00000216288.7	0.517647	87	-82	-83	-2224	-2225	-2823	169	2141	598
chr14	104177428	XRCC3	ENST00000352127.7	0.991202	337	-3	-4	-1044	-1045	-2225	340	1040	1180
chr15	23021344	NIPA2	ENST00000337451.3	0.988581	605	-7	-8	-1090	-1091	-2627	612	1082	1536
chr15	31196864	FAN1	ENST00000362065.4	0.993127	288	-2	-3	-3056	-3057	-4602	290	3053	1545
chr15	48624393	DUT	ENST00000455976.2	0.630872	93	-55	-56	-550	-551	-1841	148	494	1290
chr15	49338627	SECISBP2L	ENST00000261847.3	0.0298507	3	-130	-131	-3301	-3302	-6775	133	3170	3473
chr15	52338160	MAPK6	ENST00000261845.5	0.384139	309	-497	-498	-2663	-2664	-3928	806	2165	1264
chr15	52338428	MAPK6	ENST00000261845.5	0.716233	577	-229	-230	-2395	-2396	-3660	806	2165	1264
chr15	52338435	MAPK6	ENST00000261845.5	0.724907	584	-222	-223	-2388	-2389	-3653	806	2165	1264
chr15	52338488	MAPK6	ENST00000261845.5	0.790582	637	-169	-170	-2335	-2336	-3600	806	2165	1264
chr15	52338490	MAPK6	ENST00000261845.5	0.793061	639	-167	-168	-2333	-2334	-3598	806	2165	1264
chr15	52338493	MAPK6	ENST00000261845.5	0.796778	642	-164	-165	-2330	-2331	-3595	806	2165	1264
chr15	52338533	MAPK6	ENST00000261845.5	0.846344	682	-124	-125	-2290	-2291	-3555	806	2165	1264
chr15	52338564	MAPK6	ENST00000261845.5	0.884758	713	-93	-94	-2259	-2260	-3524	806	2165	1264
chr15	52338579	MAPK6	ENST00000261845.5	0.903346	728	-78	-79	-2244	-2245	-3509	806	2165	1264
chr15	52338613	MAPK6	ENST00000261845.5	0.945477	762	-44	-45	-2210	-2211	-3475	806	2165	1264
chr15	52338615	MAPK6	ENST00000261845.5	0.947955	764	-42	-43	-2208	-2209	-3473	806	2165	1264
chr15	59280126	RNF111	ENST00000348370.4	0.630485	272	-160	-161	-3121	-3122	-5640	432	2960	2518
chr15	59280184	RNF111	ENST00000348370.4	0.764434	330	-102	-103	-3063	-3064	-5582	432	2960	2518
chr15	64592570	CTD-2116N17.1	ENST00000606793.1	0.834967	510	-101	-102	-1316	-1317	-1397	611	1214	80
chr15	64592655	CTD-2116N17.1	ENST00000606793.1	0.696078	425	-186	-187	-1401	-1402	-1482	611	1214	80
chr15	64592662	CTD-2116N17.1	ENST00000606793.1	0.684641	418	-193	-194	-1408	-1409	-1489	611	1214	80
chr15	65808050	DPP8	ENST00000341861.5	0.987982	1561	-19	-20	-2716	-2717	-7137	1580	2696	4420
chr15	69453072	GLCE	ENST00000261858.2	0.438596	99	-128	-129	-1982	-1983	-4937	227	1853	2954
chr15	69453087	GLCE	ENST00000261858.2	0.504386	114	-113	-114	-1967	-1968	-4922	227	1853	2954
chr15	93443915	CHD2	ENST00000394196.4	0.803371	857	-210	-211	-5697	-5698	-8999	1067	5486	3301
chr15	93444025	CHD2	ENST00000394196.4	0.906367	967	-100	-101	-5587	-5588	-8889	1067	5486	3301
chr16	739846	WDR24	ENST00000293883.4	0.730263	554	-205	-206	-2578	-2579	-2690	759	2372	111
chr16	1359696	UBE2I	ENST00000397514.3	0.676364	185	-89	-90	-566	-567	-2790	274	476	2223
chr16	3451782	ZNF174	ENST00000268655.4	0.620513	362	-222	-223	-1446	-1447	-1897	584	1223	450
chr16	3451786	ZNF174	ENST00000268655.4	0.62735	366	-218	-219	-1442	-1443	-1893	584	1223	450
chr16	3451902	ZNF174	ENST00000268655.4	0.825641	482	-102	-103	-1326	-1327	-1777	584	1223	450
chr16	3658992	SLX4	ENST00000294008.3	0.959438	614	-26	-27	-5531	-5532	-6692	640	5504	1160
chr16	8719492	METTL22	ENST00000381920.3	0.883721	227	-30	-31	-1245	-1246	-1324	257	1214	78
chr16	18937502	SMG1	ENST00000389467.3	0.619835	224	-138	-139	-11127	-11128	-15843	362	10988	4715
chr16	20912202	LYRM1	ENST00000219168.4	0.346883	127	-241	-242	-610	-611	-1498	368	368	887
chr16	20914029	LYRM1	ENST00000219168.4	0.9729	358	-10	-11	-379	-380	-1267	368	368	887
chr16	23652501	PALB2	ENST00000261584.4	0.856209	130	-22	-23	-3583	-3584	-3872	152	3560	288
chr16	25268630	ZKSCAN2	ENST00000328086.7	0.774876	622	-181	-182	-3085	-3086	-6900	803	2903	3814
chr16	29974233	TMEM219	ENST00000566848.1	0.505353	235	-231	-232	-954	-955	-1056	466	722	101
chr16	31085267	ZNF668	ENST00000300849.4	0.548246	374	-309	-310	-2169	-2170	-2387	683	1859	217
chr16	50783555	CYLD	ENST00000311559.9	0.861893	336	-54	-55	-2925	-2926	-5034	390	2870	2108
chr16	50783608	CYLD	ENST00000311559.9	0.997442	389	-1	-2	-2872	-2873	-4981	390	2870	2108
chr16	53189938	CHD9	ENST00000398510.3	0.275862	23	-63	-64	-8757	-8758	-11313	86	8693	2555
chr16	53189998	CHD9	ENST00000398510.3	0.965517	83	-3	-4	-8697	-8698	-11253	86	8693	2555
chr16	57238566	RSPRY1	ENST00000394420.4	0.987342	311	-4	-5	-1735	-1736	-3235	315	1730	1499
chr16	58633358	CNOT1	ENST00000317147.5	0.651652	216	-116	-117	-7247	-7248	-8254	332	7130	1006
chr16	66968793	CES2	ENST00000317091.4	0.438008	430	-553	-554	-2425	-2426	-3496	983	1871	1070
chr16	66968826	CES2	ENST00000317091.4	0.471545	463	-520	-521	-2392	-2393	-3463	983	1871	1070
chr16	66969204	CES2	ENST00000317091.4	0.855691	841	-142	-143	-2014	-2015	-3085	983	1871	1070
chr16	66969329	CES2	ENST00000317091.4	0.982724	966	-17	-18	-1889	-1890	-2960	983	1871	1070
chr16	69154388	CHTF8	ENST00000306585.6	0.884298	427	-56	-57	-1631	-1632	-2475	483	1574	843
chr16	69154412	CHTF8	ENST00000306585.6	0.834711	403	-80	-81	-1655	-1656	-2499	483	1574	843
chr16	69458565	CYB5B	ENST00000307892.8	0.764045	67	-21	-22	-474	-475	-4218	88	452	3743
chr16	70432599	ST3GAL2	ENST00000342907.2	0.855643	977	-165	-166	-1218	-1219	-3472	1142	1052	2253
chr16	70557821	SF3B3	ENST00000302516.5	0.620853	130	-80	-81	-3734	-3735	-6838	210	3653	3103
chr16	72124666	TXNL4B	ENST00000268483.3	0.947205	304	-17	-18	-467	-468	-2251	321	449	1783
chr16	84135390	MBTPS1	ENST00000343411.3	0.997984	494	-1	-2	-3160	-3161	-3843	495	3158	682
chr16	84135417	MBTPS1	ENST00000343411.3	0.943548	467	-28	-29	-3187	-3188	-3870	495	3158	682
chr16	84135448	MBTPS1	ENST00000343411.3	0.881048	436	-59	-60	-3218	-3219	-3901	495	3158	682
chr16	84135456	MBTPS1	ENST00000343411.3	0.864919	428	-67	-68	-3226	-3227	-3909	495	3158	682
chr16	84135514	MBTPS1	ENST00000343411.3	0.747984	370	-125	-126	-3284	-3285	-3967	495	3158	682
chr16	84135531	MBTPS1	ENST00000343411.3	0.71371	353	-142	-143	-3301	-3302	-3984	495	3158	682
chr16	84135551	MBTPS1	ENST00000343411.3	0.673387	333	-162	-163	-3321	-3322	-4004	495	3158	682
chr16	84135566	MBTPS1	ENST00000343411.3	0.643145	318	-177	-178	-3336	-3337	-4019	495	3158	682
chr17	3728241	C17orf85	ENST00000158149.3	0.908482	813	-82	-83	-1105	-1106	-2983	895	1022	1877
chr17	3728278	C17orf85	ENST00000158149.3	0.867188	776	-119	-120	-1142	-1143	-3020	895	1022	1877
chr17	4046898	CYB5D2	ENST00000301391.3	0.698	348	-151	-152	-946	-947	-1561	499	794	614
chr17	5391800	MIS12	ENST00000381165.3	0.730561	403	-149	-150	-767	-768	-2101	552	617	1333
chr17	8079667	TMEM107	ENST00000449985.2	0.287356	24	-62	-63	-170	-171	-1185	86	107	1014
chr17	11896172	ZNF18	ENST00000322748.3	0.958678	579	-25	-26	-1675	-1676	-2187	604	1649	511
chr17	11896177	ZNF18	ENST00000322748.3	0.950413	574	-30	-31	-1680	-1681	-2192	604	1649	511
chr17	13504657	HS3ST3A1	ENST00000284110.1	0.736842	587	-210	-211	-1431	-1432	-1939	797	1220	507
chr17	16097889	NCOR1	ENST00000268712.3	0.98062	252	-5	-6	-7328	-7329	-10467	257	7322	3138
chr17	21454738	C17orf51	ENST00000391411.5	0.79845	205	-52	-53	-718	-719	-7708	257	665	6989
chr17	26646231	TMEM97	ENST00000226230.6	0.765517	110	-34	-35	-565	-566	-2453	144	530	1887
chr17	26646264	TMEM97	ENST00000226230.6	0.993103	143	-1	-2	-532	-533	-2420	144	530	1887
chr17	33905229	PEX12	ENST00000225873.4	0.690789	419	-188	-189	-1268	-1269	-2255	607	1079	986
chr17	34900848	GGNBP2	ENST00000304718.4	0.35443	111	-204	-205	-2298	-2299	-2735	315	2093	436
chr17	34901572	GGNBP2	ENST00000304718.4	0.996835	314	-1	-2	-2095	-2096	-2532	315	2093	436
chr17	37008941	RPL23	ENST00000245857.5	0.879725	255	-35	-36	-281	-282	-332	290	245	50
chr17	38990744	TMEM99	ENST00000301665.3	0.921053	279	-24	-25	-801	-802	-1778	303	776	976
chr17	39845147	EIF1	ENST00000469257.1	0.0205479	2	-143	-144	-485	-486	-2327	145	341	1841
chr17	41246698	BRCA1	ENST00000309486.4	0.963035	989	-38	-39	-4742	-4743	-6124	1027	4703	1381
chr17	42264417	TMUB2	ENST00000357984.3	0.42953	63	-85	-86	-991	-992	-1857	148	905	865
chr17	42264425	TMUB2	ENST00000357984.3	0.483221	71	-77	-78	-983	-984	-1849	148	905	865
chr17	46688299	HOXB7	ENST00000239165.7	0.818182	80	-18	-19	-672	-673	-1282	98	653	609
chr17	46688311	HOXB7	ENST00000239165.7	0.69697	68	-30	-31	-684	-685	-1294	98	653	609
chr17	47075082	IGF2BP1	ENST00000290341.3	0.92515	308	-25	-26	-1759	-1760	-7965	333	1733	6205
chr17	47700174	SPOP	ENST00000347630.2	0.997126	346	-1	-2	-1126	-1127	-2618	347	1124	1491
chr17	47700182	SPOP	ENST00000347630.2	0.974138	338	-9	-10	-1134	-1135	-2626	347	1124	1491
chr17	47700225	SPOP	ENST00000347630.2	0.850575	295	-52	-53	-1177	-1178	-2669	347	1124	1491
chr17	48046813	DLX4	ENST00000240306.3	0.935593	275	-19	-20	-742	-743	-1756	294	722	1013
chr17	53499161	MMD	ENST00000262065.3	0.649832	192	-104	-105	-821	-822	-2542	296	716	1720
chr17	54910333	C17orf67	ENST00000397861.2	0.507812	649	-630	-631	-903	-904	-1363	1279	272	459
chr17	54910400	C17orf67	ENST00000397861.2	0.455469	582	-697	-698	-970	-971	-1430	1279	272	459
chr17	55055515	SCPEP1	ENST00000262288.3	0.909091	49	-5	-6	-1364	-1365	-1892	54	1358	527
chr17	56494101	RNF43	ENST00000584437.1	0.40593	793	-1162	-1163	-3514	-3515	-4781	1955	2351	1266
chr17	56494179	RNF43	ENST00000584437.1	0.366053	715	-1240	-1241	-3592	-3593	-4859	1955	2351	1266
chr17	56494441	RNF43	ENST00000584437.1	0.232106	453	-1502	-1503	-3854	-3855	-5121	1955	2351	1266
chr17	62504772	CEP95	ENST00000553412.1	0.32294	144	-304	-305	-2278	-2279	-2441	448	1973	162
chr17	65989266	C17orf58	ENST00000334461.7	0.990476	311	-3	-4	-231	-232	-1223	314	227	991
chr17	65989332	C17orf58	ENST00000334461.7	0.780952	245	-69	-70	-297	-298	-1289	314	227	991
chr17	66244534	AMZ2	ENST00000359783.4	0.523664	342	-312	-313	-1221	-1222	-1379	654	908	157
chr17	66244728	AMZ2	ENST00000359783.4	0.819847	536	-118	-119	-1027	-1028	-1185	654	908	157
chr17	66244760	AMZ2	ENST00000359783.4	0.868702	568	-86	-87	-995	-996	-1153	654	908	157
chr17	66244762	AMZ2	ENST00000359783.4	0.871756	570	-84	-85	-993	-994	-1151	654	908	157
chr17	66244767	AMZ2	ENST00000359783.4	0.879389	575	-79	-80	-988	-989	-1146	654	908	157
chr17	66303480	ARSG	ENST00000448504.2	0.806533	641	-154	-155	-1732	-1733	-4000	795	1577	2267
chr17	73975510	TEN1	ENST00000397640.1	0.704698	209	-88	-89	-460	-461	-784	297	371	323
chr17	80616500	RAB40B	ENST00000269347.6	0.903934	987	-105	-106	-405	-406	-1201	1092	299	795
chr18	158655	USP14	ENST00000261601.7	0.527473	47	-43	-44	-1528	-1529	-4873	90	1484	3344
chr18	2571158	METTL4	ENST00000319888.6	0.439299	350	-448	-449	-1708	-1709	-3250	798	1259	1541
chr18	2571227	METTL4	ENST00000319888.6	0.352941	281	-517	-518	-1777	-1778	-3319	798	1259	1541
chr18	13730740	RNMT	ENST00000383314.2	0.766667	183	-56	-57	-1487	-1488	-6066	239	1430	4578
chr18	19154811	ESCO1	ENST00000269214.5	0.993603	931	-6	-7	-2529	-2530	-3591	937	2522	1061
chr18	19154831	ESCO1	ENST00000269214.5	0.972281	911	-26	-27	-2549	-2550	-3611	937	2522	1061
chr18	19154854	ESCO1	ENST00000269214.5	0.947761	888	-49	-50	-2572	-2573	-3634	937	2522	1061
chr18	19154860	ESCO1	ENST00000269214.5	0.941365	882	-55	-56	-2578	-2579	-3640	937	2522	1061
chr18	19154875	ESCO1	ENST00000269214.5	0.925373	867	-70	-71	-2593	-2594	-3655	937	2522	1061
chr18	19154884	ESCO1	ENST00000269214.5	0.915778	858	-79	-80	-2602	-2603	-3664	937	2522	1061
chr18	19154895	ESCO1	ENST00000269214.5	0.904051	847	-90	-91	-2613	-2614	-3675	937	2522	1061
chr18	19154898	ESCO1	ENST00000269214.5	0.900853	844	-93	-94	-2616	-2617	-3678	937	2522	1061
chr18	19154958	ESCO1	ENST00000269214.5	0.836887	784	-153	-154	-2676	-2677	-3738	937	2522	1061
chr18	19154990	ESCO1	ENST00000269214.5	0.802772	752	-185	-186	-2708	-2709	-3770	937	2522	1061
chr18	19154996	ESCO1	ENST00000269214.5	0.796375	746	-191	-192	-2714	-2715	-3776	937	2522	1061
chr18	19155046	ESCO1	ENST00000269214.5	0.74307	696	-241	-242	-2764	-2765	-3826	937	2522	1061
chr18	19164358	ESCO1	ENST00000269214.5	0.168443	157	-780	-781	-3303	-3304	-4365	937	2522	1061
chr18	20513463	RBBP8	ENST00000327155.5	0.534483	185	-162	-163	-2856	-2857	-3102	347	2693	245
chr18	32259494	DTNA	ENST00000269190.7	0.79	236	-63	-64	-2298	-2299	-5962	299	2234	3663
chr18	32821519	ZNF397	ENST00000585800.1	0.69888	498	-215	-216	-839	-840	-1547	713	623	707
chr18	47017965	RPL17	ENST00000418495.1	0.932551	317	-23	-24	-578	-579	-609	340	554	30
chr18	47017972	RPL17	ENST00000418495.1	0.912023	310	-30	-31	-585	-586	-616	340	554	30
chr18	47017997	RPL17	ENST00000418495.1	0.83871	285	-55	-56	-610	-611	-641	340	554	30
chr18	47018009	RPL17	ENST00000418495.1	0.803519	273	-67	-68	-622	-623	-653	340	554	30
chr18	51797810	POLI	ENST00000217800.5	0.411458	78	-113	-114	-1958	-1959	-2210	191	1844	251
chr18	66382239	TMX3	ENST00000299608.2	0.936909	296	-20	-21	-1385	-1386	-4630	316	1364	3244
chr18	66382249	TMX3	ENST00000299608.2	0.905363	286	-30	-31	-1395	-1396	-4640	316	1364	3244
chr18	66382267	TMX3	ENST00000299608.2	0.84858	268	-48	-49	-1413	-1414	-4658	316	1364	3244
chr18	71815984	TIMM21	ENST00000169551.6	0.802013	238	-59	-60	-806	-807	-1288	297	746	481
chr19	1206751	STK11	ENST00000326873.7	0.862745	1011	-161	-162	-1463	-1464	-2316	1172	1301	852
chr19	1206807	STK11	ENST00000326873.7	0.910486	1067	-105	-106	-1407	-1408	-2260	1172	1301	852
chr19	1206814	STK11	ENST00000326873.7	0.916454	1074	-98	-99	-1400	-1401	-2253	1172	1301	852
chr19	11456302	TMEM205	ENST00000354882.5	0.985948	420	-6	-7	-576	-577	-613	426	569	36
chr19	14629197	DNAJB1	ENST00000254322.2	0.507042	35	-35	-36	-1058	-1059	-2228	70	1022	1169
chr19	36605956	POLR2I	ENST00000221859.4	0.597959	292	-197	-198	-575	-576	-620	489	377	44
chr19	36726771	ZNF146	ENST00000443387.2	0.424395	420	-571	-572	-1450	-1451	-2905	991	878	1454
chr19	36727183	ZNF146	ENST00000443387.2	0.839718	832	-159	-160	-1038	-1039	-2493	991	878	1454
chr19	36727302	ZNF146	ENST00000443387.2	0.959677	951	-40	-41	-919	-920	-2374	991	878	1454
chr19	37203325	ZNF567	ENST00000360729.4	0.747253	135	-46	-47	-1897	-1898	-2555	181	1850	657
chr19	37203357	ZNF567	ENST00000360729.4	0.923077	167	-14	-15	-1865	-1866	-2523	181	1850	657
chr19	37956242	ZNF569	ENST00000316950.6	0.874552	487	-70	-71	-2131	-2132	-3573	557	2060	1441
chr19	41255741	C19orf54	ENST00000378313.2	0.733333	87	-32	-33	-1088	-1089	-2665	119	1055	1576
chr19	48752851	CARD8	ENST00000359009.4	0.239617	74	-238	-239	-1534	-1535	-5140	312	1295	3605
chr19	50380446	AKT1S1	ENST00000391832.3	0.347328	90	-171	-172	-942	-943	-1820	261	770	877
chr19	50413118	NUP62	ENST00000413454.1	0.793774	203	-53	-54	-1622	-1623	-3032	256	1568	1409
chr19	51301721	C19orf48	ENST00000345523.4	0.984584	957	-15	-16	-369	-370	-760	972	353	390
chr19	51301740	C19orf48	ENST00000345523.4	0.965057	938	-34	-35	-388	-389	-779	972	353	390
chr19	51301761	C19orf48	ENST00000345523.4	0.943474	917	-55	-56	-409	-410	-800	972	353	390
chr19	51301847	C19orf48	ENST00000345523.4	0.855087	831	-141	-142	-495	-496	-886	972	353	390
chr19	51301909	C19orf48	ENST00000345523.4	0.791367	769	-203	-204	-557	-558	-948	972	353	390
chr19	51302034	C19orf48	ENST00000345523.4	0.662898	644	-328	-329	-682	-683	-1073	972	353	390
chr19	52477656	ZNF350	ENST00000243644.4	0.815789	185	-42	-43	-1641	-1642	-2152	227	1598	510
chr19	54024769	ZNF331	ENST00000253144.9	0.369092	491	-841	-842	-2233	-2234	-4550	1332	1391	2316
chr19	57764569	ZNF805	ENST00000354309.4	0.964509	461	-17	-18	-1502	-1503	-1934	478	1484	431
chr19	57874988	ZNF547	ENST00000282282.3	0.366667	54	-95	-96	-1304	-1305	-2684	149	1208	1379
chr19	57874988	TRAPPC2P1	ENST00000543226.1	0.518868	109	-102	-103	-525	-526	-622	211	422	96
chr2	9563895	CPSF3	ENST00000238112.3	0.966019	198	-7	-8	-2062	-2063	-2146	205	2054	83
chr2	26257126	RAB10	ENST00000264710.4	0.296593	147	-351	-352	-954	-955	-3387	498	602	2432
chr2	26467814	HADHB	ENST00000317799.5	0.5	51	-52	-53	-1477	-1478	-1992	103	1424	514
chr2	27531195	UCN	ENST00000296099.2	0.397993	118	-180	-181	-555	-556	-676	298	374	120
chr2	30371254	YPEL5	ENST00000379519.3	0.600451	265	-177	-178	-543	-544	-2233	442	365	1689
chr2	30371291	YPEL5	ENST00000379519.3	0.683973	302	-140	-141	-506	-507	-2196	442	365	1689
chr2	30371399	YPEL5	ENST00000379519.3	0.927765	410	-32	-33	-398	-399	-2088	442	365	1689
chr2	32853243	TTC27	ENST00000317907.4	0.497835	114	-116	-117	-2648	-2649	-2761	230	2531	112
chr2	32853291	TTC27	ENST00000317907.4	0.705628	162	-68	-69	-2600	-2601	-2713	230	2531	112
chr2	37544006	PRKD3	ENST00000234179.2	0.390991	216	-338	-339	-3011	-3012	-5683	554	2672	2671
chr2	55459583	RPS27A	ENST00000272317.6	0.141975	45	-278	-279	-749	-750	-1025	323	470	275
chr2	55459689	RPS27A	ENST00000272317.6	0.469136	151	-172	-173	-643	-644	-919	323	470	275
chr2	55495834	MTIF2	ENST00000263629.4	0.386076	121	-194	-195	-2378	-2379	-2406	315	2183	27
chr2	55646305	CCDC88A	ENST00000263630.8	0.885457	687	-89	-90	-5621	-5622	-8979	776	5531	3357
chr2	61405508	AHSA2	ENST00000357022.2	0.759936	955	-302	-303	-716	-717	-1481	1257	413	764
chr2	61764794	XPO1	ENST00000401558.2	0.858516	624	-103	-104	-3319	-3320	-4290	727	3215	970
chr2	62934233	EHBP1	ENST00000263991.5	0.807054	388	-93	-94	-3789	-3790	-4776	481	3695	986
chr2	62934237	EHBP1	ENST00000263991.5	0.815353	392	-89	-90	-3785	-3786	-4772	481	3695	986
chr2	62934248	EHBP1	ENST00000263991.5	0.838174	403	-78	-79	-3774	-3775	-4761	481	3695	986
chr2	62934318	EHBP1	ENST00000263991.5	0.983402	473	-8	-9	-3704	-3705	-4691	481	3695	986
chr2	68693495	FBXO48	ENST00000377957.3	0.382353	155	-252	-253	-720	-721	-5510	407	467	4789
chr2	68693527	FBXO48	ENST00000377957.3	0.303922	123	-284	-285	-752	-753	-5542	407	467	4789
chr2	69870754	AAK1	ENST00000406297.3	0.254642	95	-281	-282	-2873	-2874	-4403	376	2591	1529
chr2	71576031	ZNF638	ENST00000264447.4	0.83121	260	-53	-54	-5990	-5991	-6244	313	5936	253
chr2	71576041	ZNF638	ENST00000264447.4	0.863057	270	-43	-44	-5980	-5981	-6234	313	5936	253
chr2	85584161	ELMOD3	ENST00000315658.7	0.382239	98	-160	-161	-1336	-1337	-2586	258	1175	1249
chr2	85584180	ELMOD3	ENST00000315658.7	0.455598	117	-141	-142	-1317	-1318	-2567	258	1175	1249
chr2	85584250	ELMOD3	ENST00000315658.7	0.725869	187	-71	-72	-1247	-1248	-2497	258	1175	1249
chr2	85584300	ELMOD3	ENST00000315658.7	0.918919	237	-21	-22	-1197	-1198	-2447	258	1175	1249
chr2	99342883	MGAT4A	ENST00000264968.3	0.760989	276	-87	-88	-1695	-1696	-8155	363	1607	6459
chr2	99342917	MGAT4A	ENST00000264968.3	0.667582	242	-121	-122	-1729	-1730	-8189	363	1607	6459
chr2	99342965	MGAT4A	ENST00000264968.3	0.535714	194	-169	-170	-1777	-1778	-8237	363	1607	6459
chr2	99734064	TSGA10	ENST00000355053.4	0.688394	432	-196	-197	-2293	-2294	-2604	628	2096	310
chr2	99734066	TSGA10	ENST00000355053.4	0.685215	430	-198	-199	-2295	-2296	-2606	628	2096	310
chr2	99734082	TSGA10	ENST00000355053.4	0.659777	414	-214	-215	-2311	-2312	-2622	628	2096	310
chr2	113404214	SLC20A1	ENST00000272542.3	0.64564	347	-191	-192	-2231	-2232	-3033	538	2039	801
chr2	113404254	SLC20A1	ENST00000272542.3	0.719852	387	-151	-152	-2191	-2192	-2993	538	2039	801
chr2	113404285	SLC20A1	ENST00000272542.3	0.777365	418	-120	-121	-2160	-2161	-2962	538	2039	801
chr2	113404351	SLC20A1	ENST00000272542.3	0.899814	484	-54	-55	-2094	-2095	-2896	538	2039	801
chr2	132480092	C2orf27A	ENST00000355171.4	0.278311	144	-376	-377	-988	-989	-1186	520	611	197
chr2	132480149	C2orf27A	ENST00000355171.4	0.387716	201	-319	-320	-931	-932	-1129	520	611	197
chr2	132480170	C2orf27A	ENST00000355171.4	0.428023	222	-298	-299	-910	-911	-1108	520	611	197
chr2	136360188	R3HDM1	ENST00000264160.4	0.648649	239	-130	-131	-3430	-3431	-4408	369	3299	977
chr2	162173073	PSMD14	ENST00000409682.3	0.984375	692	-11	-12	-944	-945	-1261	703	932	316
chr2	166627214	GALNT3	ENST00000392701.3	0.996134	772	-3	-4	-1905	-1906	-3095	775	1901	1189
chr2	170428561	FASTKD1	ENST00000453153.2	0.939481	325	-21	-22	-2565	-2566	-2641	346	2543	75
chr2	170428584	FASTKD1	ENST00000453153.2	0.873199	302	-44	-45	-2588	-2589	-2664	346	2543	75
chr2	170428592	FASTKD1	ENST00000453153.2	0.850144	294	-52	-53	-2596	-2597	-2672	346	2543	75
chr2	170428606	FASTKD1	ENST00000453153.2	0.809798	280	-66	-67	-2610	-2611	-2686	346	2543	75
chr2	170428657	FASTKD1	ENST00000453153.2	0.662824	229	-117	-118	-2661	-2662	-2737	346	2543	75
chr2	170440970	PPIG	ENST00000260970.3	0.55	120	-99	-100	-2364	-2365	-6247	219	2264	3882
chr2	170590448	KLHL23	ENST00000392647.2	0.381148	92	-151	-152	-1828	-1829	-3984	243	1676	2155
chr2	177135109	MTX2	ENST00000392529.2	0.930864	376	-28	-29	-790	-791	-1144	404	761	353
chr2	177135130	MTX2	ENST00000392529.2	0.982716	397	-7	-8	-769	-770	-1123	404	761	353
chr2	180635317	ZNF385B	ENST00000410066.1	0.807947	487	-116	-117	-1532	-1533	-2800	603	1415	1267
chr2	181845536	UBE2E3	ENST00000410062.4	0.519084	203	-189	-190	-813	-814	-1366	392	623	552
chr2	183582725	DNAJC10	ENST00000264065.7	0.787952	326	-88	-89	-2470	-2471	-19802	414	2381	17331
chr2	183582750	DNAJC10	ENST00000264065.7	0.848193	351	-63	-64	-2445	-2446	-19777	414	2381	17331
chr2	183582762	DNAJC10	ENST00000264065.7	0.877108	363	-51	-52	-2433	-2434	-19765	414	2381	17331
chr2	190530810	ASNSD1	ENST00000260952.4	0.883777	364	-48	-49	-1980	-1981	-2085	412	1931	104
chr2	200820473	C2orf47	ENST00000295079.2	0.850932	273	-48	-49	-924	-925	-1221	321	875	296
chr2	201754304	NIF3L1	ENST00000359683.4	0.604361	193	-127	-128	-1180	-1181	-1432	320	1052	251
chr2	201936611	NDUFB3	ENST00000237889.4	0.464396	149	-173	-174	-470	-471	-605	322	296	134
chr2	203776604	WDR12	ENST00000261015.4	0.461333	345	-404	-405	-1676	-1677	-7754	749	1271	6077
chr2	203881016	NBEAL1	ENST00000449802.1	0.726727	241	-91	-92	-8176	-8177	-10696	332	8084	2519
chr2	203881027	NBEAL1	ENST00000449802.1	0.75976	252	-80	-81	-8165	-8166	-10685	332	8084	2519
chr2	206547286	NRP2	ENST00000355117.4	0.079646	62	-728	-729	-2396	-2397	-2514	790	1667	117
chr2	206547671	NRP2	ENST00000355117.4	0.566372	447	-343	-344	-2011	-2012	-2129	790	1667	117
chr2	206547691	NRP2	ENST00000355117.4	0.591656	467	-323	-324	-1991	-1992	-2109	790	1667	117
chr2	206547721	NRP2	ENST00000355117.4	0.629583	497	-293	-294	-1961	-1962	-2079	790	1667	117
chr2	206547782	NRP2	ENST00000355117.4	0.7067	558	-232	-233	-1900	-1901	-2018	790	1667	117
chr2	206547976	NRP2	ENST00000355117.4	0.95196	752	-38	-39	-1706	-1707	-1824	790	1667	117
chr2	206547980	NRP2	ENST00000355117.4	0.957016	756	-34	-35	-1702	-1703	-1820	790	1667	117
chr2	207024113	NDUFS1	ENST00000233190.6	0.805243	214	-52	-53	-2236	-2237	-11604	266	2183	9367
chr2	207024452	EEF1B2	ENST00000392222.2	0.330667	123	-251	-252	-929	-930	-974	374	677	44
chr2	207024457	EEF1B2	ENST00000392222.2	0.344	128	-246	-247	-924	-925	-969	374	677	44
chr2	207024511	EEF1B2	ENST00000392222.2	0.488	182	-192	-193	-870	-871	-915	374	677	44
chr2	207024543	EEF1B2	ENST00000392222.2	0.573333	214	-160	-161	-838	-839	-883	374	677	44
chr2	207024693	EEF1B2	ENST00000392222.2	0.973333	364	-10	-11	-688	-689	-733	374	677	44
chr2	208030420	KLF7	ENST00000309446.6	0.66313	249	-127	-128	-1036	-1037	-8112	376	908	7075
chr2	208866464	PLEKHM3	ENST00000427836.2	0.795918	389	-100	-101	-2386	-2387	-2402	489	2285	15
chr2	208866499	PLEKHM3	ENST00000427836.2	0.72449	354	-135	-136	-2421	-2422	-2437	489	2285	15
chr2	208866535	PLEKHM3	ENST00000427836.2	0.65102	318	-171	-172	-2457	-2458	-2473	489	2285	15
chr2	219524939	BCS1L	ENST00000392109.1	0.808271	214	-51	-52	-1311	-1312	-1368	265	1259	56
chr2	219525672	BCS1L	ENST00000392109.1	0.857143	227	-38	-39	-1298	-1299	-1355	265	1259	56
chr2	233414699	TIGD1	ENST00000408957.3	0.832808	527	-106	-107	-1882	-1883	-1920	633	1775	37
chr2	242254890	2023-09-02	ENST00000360051.3	0.425	186	-253	-254	-1339	-1340	-3426	439	1085	2086
chr2	242447546	STK25	ENST00000316586.4	0.728571	254	-95	-96	-1376	-1377	-4364	349	1280	2987
chr20	524366	CSNK2A1	ENST00000217244.3	0.265957	99	-276	-277	-1452	-1453	-4316	375	1175	2863
chr20	1373729	FKBP1A	ENST00000400137.4	0.47561	77	-86	-87	-413	-414	-1544	163	326	1130
chr20	2845883	PTPRA	ENST00000380393.3	0.696793	477	-208	-209	-2617	-2618	-3158	685	2408	540
chr20	3129721	FASTKD5	ENST00000380266.3	0.987578	317	-4	-5	-2299	-2300	-2556	321	2294	256
chr20	3835353	MAVS	ENST00000416600.2	0.562005	212	-166	-167	-1366	-1367	-1494	378	1199	127
chr20	10394183	MKKS	ENST00000347364.3	0.973788	742	-20	-21	-1733	-1734	-5971	762	1712	4237
chr20	10394188	MKKS	ENST00000347364.3	0.967235	737	-25	-26	-1738	-1739	-5976	762	1712	4237
chr20	10394264	MKKS	ENST00000347364.3	0.867628	661	-101	-102	-1814	-1815	-6052	762	1712	4237
chr20	10394418	MKKS	ENST00000347364.3	0.665793	507	-255	-256	-1968	-1969	-6206	762	1712	4237
chr20	10394455	MKKS	ENST00000347364.3	0.6173	470	-292	-293	-2005	-2006	-6243	762	1712	4237
chr20	10394459	MKKS	ENST00000347364.3	0.612058	466	-296	-297	-2009	-2010	-6247	762	1712	4237
chr20	10401260	MKKS	ENST00000347364.3	0.343381	261	-501	-502	-2214	-2215	-6452	762	1712	4237
chr20	14308161	FLRT3	ENST00000341420.4	0.982571	450	-8	-9	-1958	-1959	-3520	458	1949	1561
chr20	14308163	FLRT3	ENST00000341420.4	0.978214	448	-10	-11	-1960	-1961	-3522	458	1949	1561
chr20	17550804	DSTN	ENST00000246069.7	0.858382	296	-49	-50	-547	-548	-3320	345	497	2772
chr20	17949103	SNX5	ENST00000377759.4	0.884746	260	-34	-35	-1249	-1250	-2009	294	1214	759
chr20	18123137	CSRP2BP	ENST00000377681.3	0.200957	41	-167	-168	-2513	-2514	-3441	208	2345	927
chr20	18123247	CSRP2BP	ENST00000377681.3	0.727273	151	-57	-58	-2403	-2404	-3331	208	2345	927
chr20	18123270	CSRP2BP	ENST00000377681.3	0.837321	174	-34	-35	-2380	-2381	-3308	208	2345	927
chr20	23331593	NXT1	ENST00000254998.2	0.571059	220	-166	-167	-589	-590	-902	386	422	312
chr20	32699952	EIF2S2	ENST00000374980.2	0.842342	186	-35	-36	-1037	-1038	-2469	221	1001	1431
chr20	34241599	CPNE1	ENST00000317677.5	0.00740741	0	-134	-135	-1763	-1764	-1960	134	1628	196
chr20	35350159	NDRG3	ENST00000349004.1	0.756098	61	-20	-21	-1148	-1149	-2902	81	1127	1753
chr20	44987308	SLC35C2	ENST00000243896.2	0.664596	320	-162	-163	-1260	-1261	-2126	482	1097	865
chr20	47804816	STAU1	ENST00000340954.7	0.182377	88	-399	-400	-1890	-1891	-3245	487	1490	1354
chr20	47804839	STAU1	ENST00000340954.7	0.135246	65	-422	-423	-1913	-1914	-3268	487	1490	1354
chr20	56884993	RAB22A	ENST00000244040.3	0.86121	241	-39	-40	-624	-625	-8428	280	584	7803
chr21	27107491	ATP5J	ENST00000400093.3	0.713873	493	-198	-199	-525	-526	-685	691	326	159
chr21	27107526	ATP5J	ENST00000400093.3	0.663295	458	-233	-234	-560	-561	-720	691	326	159
chr21	27107556	ATP5J	ENST00000400093.3	0.619942	428	-263	-264	-590	-591	-750	691	326	159
chr21	46237939	SUMO3	ENST00000332859.6	0.658385	105	-55	-56	-367	-368	-1701	160	311	1333
chr21	46548370	ADARB1	ENST00000348831.4	0.600484	247	-165	-166	-2271	-2272	-6634	412	2105	4362
chr21	47743031	C21orf58	ENST00000291691.7	0.667546	758	-378	-379	-1347	-1348	-2216	1136	968	868
chr22	18121623	BCL2L13	ENST00000317582.5	0.772334	267	-79	-80	-1537	-1538	-2724	346	1457	1186
chr22	22848398	ZNF280B	ENST00000360412.2	0.891753	691	-84	-85	-1716	-1717	-5034	775	1631	3317
chr22	26877881	HPS4	ENST00000336873.5	0.701375	356	-152	-153	-2279	-2280	-3429	508	2126	1149
chr22	26877999	HPS4	ENST00000336873.5	0.469548	238	-270	-271	-2397	-2398	-3547	508	2126	1149
chr22	30821816	MTFP1	ENST00000266263.5	0.854286	298	-51	-52	-552	-553	-1076	349	500	523
chr22	31063528	DUSP18	ENST00000334679.3	0.6917	349	-156	-157	-723	-724	-2129	505	566	1405
chr22	31364115	MORC2	ENST00000397641.3	0.415648	169	-239	-240	-3338	-3339	-5011	408	3098	1672
chr22	37962300	CDC42EP1	ENST00000249014.4	0.866667	363	-56	-57	-1232	-1233	-1817	419	1175	584
chr22	39916575	ATF4	ENST00000337304.2	0.00793651	6	-875	-876	-1931	-1932	-2012	881	1055	80
chr22	39917398	ATF4	ENST00000337304.2	0.941043	829	-52	-53	-1108	-1109	-1189	881	1055	80
chr22	40574002	TNRC6B	ENST00000335727.9	0.293814	56	-137	-138	-5309	-5310	-17876	193	5171	12566
chr22	40574044	TNRC6B	ENST00000335727.9	0.510309	98	-95	-96	-5267	-5268	-17834	193	5171	12566
chr22	40574052	TNRC6B	ENST00000335727.9	0.551546	106	-87	-88	-5259	-5260	-17826	193	5171	12566
chr22	40574082	TNRC6B	ENST00000335727.9	0.706186	136	-57	-58	-5229	-5230	-17796	193	5171	12566
chr22	41258463	XPNPEP3	ENST00000544094.1	0.464286	194	-225	-226	-1680	-1681	-2054	419	1454	373
chr22	41258534	XPNPEP3	ENST00000544094.1	0.633333	265	-154	-155	-1609	-1610	-1983	419	1454	373
chr3	10070331	FANCD2	ENST00000287647.3	0.892473	82	-10	-11	-4426	-4427	-5136	92	4415	709
chr3	14166194	CHCHD4	ENST00000295767.5	0.544615	176	-148	-149	-616	-617	-1423	324	467	806
chr3	14693323	CCDC174	ENST00000303688.7	0.726027	52	-20	-21	-1196	-1197	-2661	72	1175	1464
chr3	15139704	ZFYVE20	ENST00000253699.3	0.312704	191	-422	-423	-2777	-2778	-6486	613	2354	3708
chr3	15468114	METTL6	ENST00000443029.1	0.605809	145	-95	-96	-950	-951	-3874	240	854	2923
chr3	16310757	OXNAD1	ENST00000285083.5	0.929032	431	-33	-34	-972	-973	-3497	464	938	2524
chr3	28390187	AZI2	ENST00000479665.1	0.81203	431	-100	-101	-1279	-1280	-4274	531	1178	2994
chr3	28390256	AZI2	ENST00000479665.1	0.682331	362	-169	-170	-1348	-1349	-4343	531	1178	2994
chr3	49547929	DAG1	ENST00000308775.2	0.909091	379	-38	-39	-2726	-2727	-5138	417	2687	2411
chr3	49757668	AMIGO3	ENST00000535833.1	0.777166	2681	-769	-770	-2284	-2285	-3391	3450	1514	1106
chr3	49759044	AMIGO3	ENST00000535833.1	0.378441	1305	-2145	-2146	-3660	-3661	-4767	3450	1514	1106
chr3	49759078	AMIGO3	ENST00000535833.1	0.368589	1271	-2179	-2180	-3694	-3695	-4801	3450	1514	1106
chr3	49759194	AMIGO3	ENST00000535833.1	0.334975	1155	-2295	-2296	-3810	-3811	-4917	3450	1514	1106
chr3	50396508	TMEM115	ENST00000266025.3	0.976234	533	-13	-14	-1069	-1070	-1663	546	1055	593
chr3	52445041	PHF7	ENST00000327906.3	0.559091	368	-291	-292	-1437	-1438	-1761	659	1145	323
chr3	52445051	PHF7	ENST00000327906.3	0.574242	378	-281	-282	-1427	-1428	-1751	659	1145	323
chr3	57261910	APPL1	ENST00000288266.3	0.993197	145	-1	-2	-2131	-2132	-5912	146	2129	3780
chr3	57742358	SLMAP	ENST00000295951.3	0.161873	196	-1020	-1021	-3456	-3457	-5236	1216	2435	1779
chr3	57742841	SLMAP	ENST00000295951.3	0.558751	679	-537	-538	-2973	-2974	-4753	1216	2435	1779
chr3	57743339	SLMAP	ENST00000295951.3	0.967954	1177	-39	-40	-2475	-2476	-4255	1216	2435	1779
chr3	66293684	SLC25A26	ENST00000336733.6	0.915789	173	-16	-17	-577	-578	-849	189	560	271
chr3	66293687	SLC25A26	ENST00000336733.6	0.931579	176	-13	-14	-574	-575	-846	189	560	271
chr3	88107176	CGGBP1	ENST00000309534.6	0.935065	431	-30	-31	-534	-535	-4063	461	503	3528
chr3	88107183	CGGBP1	ENST00000309534.6	0.919913	424	-37	-38	-541	-542	-4070	461	503	3528
chr3	88107192	CGGBP1	ENST00000309534.6	0.900433	415	-46	-47	-550	-551	-4079	461	503	3528
chr3	88107292	CGGBP1	ENST00000309534.6	0.683983	315	-146	-147	-650	-651	-4179	461	503	3528
chr3	88198994	C3orf38	ENST00000318887.3	0.329032	101	-208	-209	-1198	-1199	-2531	309	989	1332
chr3	88199105	C3orf38	ENST00000318887.3	0.687097	212	-97	-98	-1087	-1088	-2420	309	989	1332
chr3	101280753	TRMT10C	ENST00000309922.6	0.311688	47	-106	-107	-1318	-1319	-1771	153	1211	452
chr3	101280811	TRMT10C	ENST00000309922.6	0.688312	105	-48	-49	-1260	-1261	-1713	153	1211	452
chr3	105085882	ALCAM	ENST00000306107.5	0.26	129	-370	-371	-2122	-2123	-4571	499	1751	2448
chr3	112281003	SLC35A5	ENST00000492406.1	0.519435	146	-136	-137	-1411	-1412	-4252	282	1274	2840
chr3	118949007	B4GALT4	ENST00000359213.3	0.889503	482	-60	-61	-1095	-1096	-1902	542	1034	806
chr3	119812356	GSK3B	ENST00000264235.8	0.92472	908	-74	-75	-1337	-1338	-6802	982	1262	5464
chr3	125042164	ZNF148	ENST00000360647.4	0.944444	458	-27	-28	-2412	-2413	-9192	485	2384	6779
chr3	125042201	ZNF148	ENST00000360647.4	0.868313	421	-64	-65	-2449	-2450	-9229	485	2384	6779
chr3	125313708	OSBPL11	ENST00000296220.5	0.782759	226	-63	-64	-2307	-2308	-3964	289	2243	1656
chr3	125313780	OSBPL11	ENST00000296220.5	0.534483	154	-135	-136	-2379	-2380	-4036	289	2243	1656
chr3	125313852	OSBPL11	ENST00000296220.5	0.286207	82	-207	-208	-2451	-2452	-4108	289	2243	1656
chr3	126326638	TXNRD3NB	ENST00000383572.2	0.492693	235	-243	-244	-645	-646	-895	478	401	249
chr3	130465180	PIK3R4	ENST00000356763.3	0.885305	493	-64	-65	-4141	-4142	-4521	557	4076	379
chr3	130465215	PIK3R4	ENST00000356763.3	0.822581	458	-99	-100	-4176	-4177	-4556	557	4076	379
chr3	130465248	PIK3R4	ENST00000356763.3	0.763441	425	-132	-133	-4209	-4210	-4589	557	4076	379
chr3	130465263	PIK3R4	ENST00000356763.3	0.736559	410	-147	-148	-4224	-4225	-4604	557	4076	379
chr3	130465266	PIK3R4	ENST00000356763.3	0.731183	407	-150	-151	-4227	-4228	-4607	557	4076	379
chr3	130465307	PIK3R4	ENST00000356763.3	0.657706	366	-191	-192	-4268	-4269	-4648	557	4076	379
chr3	130465324	PIK3R4	ENST00000356763.3	0.62724	349	-208	-209	-4285	-4286	-4665	557	4076	379
chr3	130465397	PIK3R4	ENST00000356763.3	0.496416	276	-281	-282	-4358	-4359	-4738	557	4076	379
chr3	135914013	MSL2	ENST00000309993.2	0.922237	675	-57	-58	-1791	-1792	-4016	732	1733	2224
chr3	136471089	STAG1	ENST00000236698.5	0.494382	131	-135	-136	-3801	-3802	-5819	266	3665	2017
chr3	136471100	STAG1	ENST00000236698.5	0.453184	120	-146	-147	-3812	-3813	-5830	266	3665	2017
chr3	136538047	SLC35G2	ENST00000393079.3	0.818792	121	-27	-28	-1266	-1267	-1455	148	1238	188
chr3	151986819	MBNL1	ENST00000282486.6	0.538002	990	-851	-852	-2018	-2019	-5431	1841	1166	3412
chr3	152017304	MBNL1	ENST00000282486.6	0.631922	1163	-678	-679	-1845	-1846	-5258	1841	1166	3412
chr3	152017338	MBNL1	ENST00000282486.6	0.65038	1197	-644	-645	-1811	-1812	-5224	1841	1166	3412
chr3	152017631	MBNL1	ENST00000282486.6	0.809446	1490	-351	-352	-1518	-1519	-4931	1841	1166	3412
chr3	152017695	MBNL1	ENST00000282486.6	0.844191	1554	-287	-288	-1454	-1455	-4867	1841	1166	3412
chr3	152017720	MBNL1	ENST00000282486.6	0.857763	1579	-262	-263	-1429	-1430	-4842	1841	1166	3412
chr3	152017727	MBNL1	ENST00000282486.6	0.861564	1586	-255	-256	-1422	-1423	-4835	1841	1166	3412
chr3	155571809	SLC33A1	ENST00000359479.3	0.949074	409	-22	-23	-1672	-1673	-1994	431	1649	321
chr3	155571813	SLC33A1	ENST00000359479.3	0.939815	405	-26	-27	-1676	-1677	-1998	431	1649	321
chr3	155571833	SLC33A1	ENST00000359479.3	0.893519	385	-46	-47	-1696	-1697	-2018	431	1649	321
chr3	155571866	SLC33A1	ENST00000359479.3	0.81713	352	-79	-80	-1729	-1730	-2051	431	1649	321
chr3	155571949	SLC33A1	ENST00000359479.3	0.625	269	-162	-163	-1812	-1813	-2134	431	1649	321
chr3	155588555	GMPS	ENST00000295920.7	0.529412	116	-104	-105	-1889	-1890	-1907	220	1784	17
chr3	158289039	MLF1	ENST00000355893.5	0.637681	87	-50	-51	-857	-858	-2115	137	806	1257
chr3	160939180	NMD3	ENST00000351193.2	0.735714	102	-37	-38	-1549	-1550	-2946	139	1511	1396
chr3	167452024	PDCD10	ENST00000392750.2	0.669856	279	-138	-139	-777	-778	-1787	417	638	1009
chr3	170077632	SKIL	ENST00000259119.4	0.274218	183	-487	-488	-2542	-2543	-2873	670	2054	330
chr3	170077696	SKIL	ENST00000259119.4	0.369598	247	-423	-424	-2478	-2479	-2809	670	2054	330
chr3	170077745	SKIL	ENST00000259119.4	0.442623	296	-374	-375	-2429	-2430	-2760	670	2054	330
chr3	170077763	SKIL	ENST00000259119.4	0.469449	314	-356	-357	-2411	-2412	-2742	670	2054	330
chr3	170077865	SKIL	ENST00000259119.4	0.621461	416	-254	-255	-2309	-2310	-2640	670	2054	330
chr3	170077960	SKIL	ENST00000259119.4	0.76304	511	-159	-160	-2214	-2215	-2545	670	2054	330
chr3	173322166	NLGN1	ENST00000361589.4	0.7225	577	-222	-223	-2694	-2695	-4514	799	2471	1819
chr3	182987507	B3GNT5	ENST00000326505.3	0.850943	450	-79	-80	-1216	-1217	-3672	529	1136	2455
chr3	182987565	B3GNT5	ENST00000326505.3	0.960377	508	-21	-22	-1158	-1159	-3614	529	1136	2455
chr3	185003366	MAP3K13	ENST00000438798.1	0.873239	185	-27	-28	-150	-151	-202	212	122	51
chr3	186264228	CRYGS	ENST00000392499.2	0.776471	263	-76	-77	-613	-614	-868	339	536	254
chr3	186264252	CRYGS	ENST00000392499.2	0.705882	239	-100	-101	-637	-638	-892	339	536	254
chr3	186264263	CRYGS	ENST00000392499.2	0.673529	228	-111	-112	-648	-649	-903	339	536	254
chr3	186264297	CRYGS	ENST00000392499.2	0.573529	194	-145	-146	-682	-683	-937	339	536	254
chr3	186264309	CRYGS	ENST00000392499.2	0.538235	182	-157	-158	-694	-695	-949	339	536	254
chr3	186264348	CRYGS	ENST00000392499.2	0.423529	143	-196	-197	-733	-734	-988	339	536	254
chr3	186264361	CRYGS	ENST00000392499.2	0.385294	130	-209	-210	-746	-747	-1001	339	536	254
chr3	196230053	RNF168	ENST00000318037.3	0.986555	586	-8	-9	-1724	-1725	-4760	594	1715	3035
chr3	196230057	RNF168	ENST00000318037.3	0.979832	582	-12	-13	-1728	-1729	-4764	594	1715	3035
chr3	196230117	RNF168	ENST00000318037.3	0.878992	522	-72	-73	-1788	-1789	-4824	594	1715	3035
chr3	196230119	RNF168	ENST00000318037.3	0.87563	520	-74	-75	-1790	-1791	-4826	594	1715	3035
chr3	196230139	RNF168	ENST00000318037.3	0.842017	500	-94	-95	-1810	-1811	-4846	594	1715	3035
chr3	196230145	RNF168	ENST00000318037.3	0.831933	494	-100	-101	-1816	-1817	-4852	594	1715	3035
chr3	196230177	RNF168	ENST00000318037.3	0.778151	462	-132	-133	-1848	-1849	-4884	594	1715	3035
chr3	196230196	RNF168	ENST00000318037.3	0.746218	443	-151	-152	-1867	-1868	-4903	594	1715	3035
chr3	196230223	RNF168	ENST00000318037.3	0.70084	416	-178	-179	-1894	-1895	-4930	594	1715	3035
chr3	196230309	RNF168	ENST00000318037.3	0.556303	330	-264	-265	-1980	-1981	-5016	594	1715	3035
chr3	196230338	RNF168	ENST00000318037.3	0.507563	301	-293	-294	-2009	-2010	-5045	594	1715	3035
chr3	196230379	RNF168	ENST00000318037.3	0.438655	260	-334	-335	-2050	-2051	-5086	594	1715	3035
chr3	196293794	WDR53	ENST00000332629.5	0.890845	505	-62	-63	-1139	-1140	-1165	567	1076	25
chr3	196293945	WDR53	ENST00000332629.5	0.625	354	-213	-214	-1290	-1291	-1316	567	1076	25
chr4	2242698	HAUS3	ENST00000243706.4	0.895652	205	-24	-25	-1836	-1837	-5414	229	1811	3577
chr4	2242731	HAUS3	ENST00000243706.4	0.752174	172	-57	-58	-1869	-1870	-5447	229	1811	3577
chr4	2242761	HAUS3	ENST00000243706.4	0.621739	142	-87	-88	-1899	-1900	-5477	229	1811	3577
chr4	10447990	ZNF518B	ENST00000326756.3	0.915718	401	-37	-38	-3262	-3263	-6492	438	3224	3229
chr4	10448042	ZNF518B	ENST00000326756.3	0.797267	349	-89	-90	-3314	-3315	-6544	438	3224	3229
chr4	10456526	ZNF518B	ENST00000326756.3	0.298405	130	-308	-309	-3533	-3534	-6763	438	3224	3229
chr4	15687904	FAM200B	ENST00000422728.2	0.169451	141	-696	-697	-2670	-2671	-2820	837	1973	149
chr4	15688095	FAM200B	ENST00000422728.2	0.397375	332	-505	-506	-2479	-2480	-2629	837	1973	149
chr4	15688182	FAM200B	ENST00000422728.2	0.501193	419	-418	-419	-2392	-2393	-2542	837	1973	149
chr4	15688184	FAM200B	ENST00000422728.2	0.50358	421	-416	-417	-2390	-2391	-2540	837	1973	149
chr4	17805816	DCAF16	ENST00000382247.1	0.951932	1009	-51	-52	-702	-703	-3538	1060	650	2835
chr4	17805880	DCAF16	ENST00000382247.1	0.891612	945	-115	-116	-766	-767	-3602	1060	650	2835
chr4	17805892	DCAF16	ENST00000382247.1	0.880302	933	-127	-128	-778	-779	-3614	1060	650	2835
chr4	17806130	DCAF16	ENST00000382247.1	0.655985	695	-365	-366	-1016	-1017	-3852	1060	650	2835
chr4	17806172	DCAF16	ENST00000382247.1	0.6164	653	-407	-408	-1058	-1059	-3894	1060	650	2835
chr4	17806201	DCAF16	ENST00000382247.1	0.589067	624	-436	-437	-1087	-1088	-3923	1060	650	2835
chr4	17806215	DCAF16	ENST00000382247.1	0.575872	610	-450	-451	-1101	-1102	-3937	1060	650	2835
chr4	20255285	SLIT2	ENST00000273739.5	0.323009	72	-153	-154	-4782	-4783	-5059	225	4628	276
chr4	26364154	RBPJ	ENST00000342320.4	0.551136	96	-79	-80	-1540	-1541	-5452	175	1460	3911
chr4	26364207	RBPJ	ENST00000342320.4	0.852273	149	-26	-27	-1487	-1488	-5399	175	1460	3911
chr4	30722235	PCDH7	ENST00000361762.2	0.197421	198	-809	-810	-4019	-4020	-5199	1007	3209	1179
chr4	39640366	SMIM14	ENST00000295958.5	0.891473	344	-42	-43	-342	-343	-6138	386	299	5795
chr4	39640421	SMIM14	ENST00000295958.5	0.749354	289	-97	-98	-397	-398	-6193	386	299	5795
chr4	52917772	SPATA18	ENST00000295213.4	0.737968	275	-98	-99	-1715	-1716	-4120	373	1616	2404
chr4	54930604	CHIC2	ENST00000263921.3	0.651282	253	-136	-137	-634	-635	-940	389	497	305
chr4	57774303	REST	ENST00000309042.7	0.729299	228	-85	-86	-3379	-3380	-7071	313	3293	3691
chr4	77996741	CCNI	ENST00000237654.4	0.724437	417	-159	-160	-1293	-1294	-2354	576	1133	1060
chr4	83350932	HNRNPDL	ENST00000295470.5	0.5	87	-88	-89	-1351	-1352	-3693	175	1262	2341
chr4	88116779	KLHL8	ENST00000273963.5	0.745614	254	-87	-88	-1950	-1951	-5366	341	1862	3415
chr4	89205585	PPM1K	ENST00000608933.1	0.779487	303	-86	-87	-1205	-1206	-6180	389	1118	4974
chr4	95129541	SMARCAD1	ENST00000354268.4	0.945205	68	-4	-5	-3085	-3086	-4843	72	3080	1757
chr4	103748883	UBE2D3	ENST00000453744.2	0.169261	86	-427	-428	-871	-872	-3903	513	443	3031
chr4	108816552	SGMS2	ENST00000359079.4	0.596401	231	-157	-158	-1255	-1256	-1655	388	1097	399
chr4	109088953	LEF1	ENST00000265165.1	0.955725	625	-29	-30	-1229	-1230	-2442	654	1199	1212
chr4	111119519	ELOVL6	ENST00000394607.3	0.835366	136	-27	-28	-825	-826	-6317	163	797	5491
chr4	113153061	AP1AR	ENST00000274000.5	0.476056	168	-186	-187	-1095	-1096	-2733	354	908	1637
chr4	113206813	TIFA	ENST00000361717.3	0.875887	246	-35	-36	-590	-591	-3910	281	554	3319
chr4	113206849	TIFA	ENST00000361717.3	0.748227	210	-71	-72	-626	-627	-3946	281	554	3319
chr4	113206887	TIFA	ENST00000361717.3	0.613475	172	-109	-110	-664	-665	-3984	281	554	3319
chr4	113206922	TIFA	ENST00000361717.3	0.489362	137	-144	-145	-699	-700	-4019	281	554	3319
chr4	115519950	UGT8	ENST00000310836.6	0.651341	339	-182	-183	-1808	-1809	-3744	521	1625	1935
chr4	115520018	UGT8	ENST00000310836.6	0.781609	407	-114	-115	-1740	-1741	-3676	521	1625	1935
chr4	119606654	METTL14	ENST00000388822.5	0.790419	131	-35	-36	-1406	-1407	-6537	166	1370	5130
chr4	121993269	NDNF	ENST00000379692.4	0.768501	404	-122	-123	-1829	-1830	-2480	526	1706	650
chr4	125632184	ANKRD50	ENST00000504087.1	0.501927	520	-517	-518	-4807	-4808	-8273	1037	4289	3465
chr4	130015063	C4orf33	ENST00000281146.5	0.821082	591	-129	-130	-729	-730	-5578	720	599	4848
chr4	140221919	NDUFC1	ENST00000539002.1	0.57847	445	-325	-326	-556	-557	-752	770	230	195
chr4	140221973	NDUFC1	ENST00000539002.1	0.508431	391	-379	-380	-610	-611	-806	770	230	195
chr4	144106535	USP38	ENST00000307017.4	0.865613	437	-68	-69	-3197	-3198	-6571	505	3128	3373
chr4	144435069	SMARCA5	ENST00000283131.3	0.982684	453	-8	-9	-3167	-3168	-7469	461	3158	4301
chr4	146435675	SMAD1	ENST00000302085.4	0.787234	332	-90	-91	-1488	-1489	-1633	422	1397	144
chr4	146435686	SMAD1	ENST00000302085.4	0.813239	343	-79	-80	-1477	-1478	-1622	422	1397	144
chr4	146435710	SMAD1	ENST00000302085.4	0.869976	367	-55	-56	-1453	-1454	-1598	422	1397	144
chr4	147442893	SLC10A7	ENST00000432059.2	0.906883	223	-23	-24	-1007	-1008	-3523	246	983	2515
chr4	148539024	TMEM184C	ENST00000296582.3	0.855401	490	-83	-84	-1400	-1401	-3687	573	1316	2286
chr4	148539085	TMEM184C	ENST00000296582.3	0.961672	551	-22	-23	-1339	-1340	-3626	573	1316	2286
chr4	170533187	NEK1	ENST00000439128.2	0.900156	576	-64	-65	-3841	-3842	-5076	640	3776	1234
chr4	170927045	MFAP3L	ENST00000361618.3	0.948052	291	-16	-17	-1246	-1247	-6026	307	1229	4779
chr4	175204843	CEP44	ENST00000503780.1	0.0386473	15	-398	-399	-1571	-1572	-4518	413	1172	2946
chr4	185570956	PRIMPOL	ENST00000314970.6	0.438799	189	-243	-244	-1926	-1927	-2099	432	1682	172
chr5	7868216	FASTKD3	ENST00000264669.5	0.861314	117	-19	-20	-2008	-2009	-2284	136	1988	275
chr5	36877172	NIPBL	ENST00000282516.8	0.625251	311	-187	-188	-8602	-8603	-10123	498	8414	1520
chr5	53409159	ARL15	ENST00000502271.1	0.635379	351	-202	-203	-280	-281	-2896	553	77	2615
chr5	53409170	ARL15	ENST00000502271.1	0.615523	340	-213	-214	-291	-292	-2907	553	77	2615
chr5	53409193	ARL15	ENST00000502271.1	0.574007	317	-236	-237	-314	-315	-2930	553	77	2615
chr5	53409206	ARL15	ENST00000502271.1	0.550542	304	-249	-250	-327	-328	-2943	553	77	2615
chr5	56471305	GPBP1	ENST00000424459.3	0.231554	294	-979	-980	-2461	-2462	-4388	1273	1481	1926
chr5	56471904	GPBP1	ENST00000424459.3	0.701727	893	-380	-381	-1862	-1863	-3789	1273	1481	1926
chr5	56471927	GPBP1	ENST00000424459.3	0.71978	916	-357	-358	-1839	-1840	-3766	1273	1481	1926
chr5	56471977	GPBP1	ENST00000424459.3	0.759027	966	-307	-308	-1789	-1790	-3716	1273	1481	1926
chr5	56472130	GPBP1	ENST00000424459.3	0.879121	1119	-154	-155	-1636	-1637	-3563	1273	1481	1926
chr5	56472141	GPBP1	ENST00000424459.3	0.887755	1130	-143	-144	-1625	-1626	-3552	1273	1481	1926
chr5	56509934	GPBP1	ENST00000424459.3	0.981947	1250	-23	-24	-1505	-1506	-3432	1273	1481	1926
chr5	60456998	SMIM15	ENST00000339020.3	0.739437	314	-111	-112	-336	-337	-2574	425	224	2237
chr5	64064896	CWC27	ENST00000381070.3	0.645161	139	-77	-78	-1496	-1497	-1938	216	1418	441
chr5	64920682	TRAPPC13	ENST00000399438.3	0.405797	139	-205	-206	-1459	-1460	-3081	344	1253	1621
chr5	64920682	CTC-534A2.2	ENST00000510585.2	0.19697	90	-371	-372	-1124	-1125	-1675	461	752	550
chr5	64920706	TRAPPC13	ENST00000399438.3	0.475362	163	-181	-182	-1435	-1436	-3057	344	1253	1621
chr5	64920706	CTC-534A2.2	ENST00000510585.2	0.248918	114	-347	-348	-1100	-1101	-1651	461	752	550
chr5	64920736	TRAPPC13	ENST00000399438.3	0.562319	193	-151	-152	-1405	-1406	-3027	344	1253	1621
chr5	64920736	CTC-534A2.2	ENST00000510585.2	0.313853	144	-317	-318	-1070	-1071	-1621	461	752	550
chr5	64920738	TRAPPC13	ENST00000399438.3	0.568116	195	-149	-150	-1403	-1404	-3025	344	1253	1621
chr5	64920738	CTC-534A2.2	ENST00000510585.2	0.318182	146	-315	-316	-1068	-1069	-1619	461	752	550
chr5	64920761	TRAPPC13	ENST00000399438.3	0.634783	218	-126	-127	-1380	-1381	-3002	344	1253	1621
chr5	64920761	CTC-534A2.2	ENST00000510585.2	0.367965	169	-292	-293	-1045	-1046	-1596	461	752	550
chr5	67522420	PIK3R1	ENST00000521381.1	0.86526	532	-83	-84	-2258	-2259	-6478	615	2174	4219
chr5	67522429	PIK3R1	ENST00000521381.1	0.87987	541	-74	-75	-2249	-2250	-6469	615	2174	4219
chr5	67522477	PIK3R1	ENST00000521381.1	0.957792	589	-26	-27	-2201	-2202	-6421	615	2174	4219
chr5	68665576	TAF9	ENST00000380818.3	0.784024	264	-73	-74	-583	-584	-918	337	509	334
chr5	68665965	RAD17	ENST00000509734.1	0.49115	332	-345	-346	-2391	-2392	-2900	677	2045	508
chr5	68665972	RAD17	ENST00000509734.1	0.501475	339	-338	-339	-2384	-2385	-2893	677	2045	508
chr5	68665984	RAD17	ENST00000509734.1	0.519174	351	-326	-327	-2372	-2373	-2881	677	2045	508
chr5	68666002	RAD17	ENST00000509734.1	0.545723	369	-308	-309	-2354	-2355	-2863	677	2045	508
chr5	68666056	RAD17	ENST00000509734.1	0.625369	423	-254	-255	-2300	-2301	-2809	677	2045	508
chr5	68666072	RAD17	ENST00000509734.1	0.648968	439	-238	-239	-2284	-2285	-2793	677	2045	508
chr5	68666089	RAD17	ENST00000509734.1	0.674041	456	-221	-222	-2267	-2268	-2776	677	2045	508
chr5	68666884	RAD17	ENST00000509734.1	0.740413	501	-176	-177	-2222	-2223	-2731	677	2045	508
chr5	68666965	RAD17	ENST00000509734.1	0.859882	582	-95	-96	-2141	-2142	-2650	677	2045	508
chr5	72858717	ANKRA2	ENST00000296785.3	0.984825	648	-10	-11	-952	-953	-1414	658	941	461
chr5	74062838	GFM2	ENST00000296805.3	0.783843	358	-99	-100	-2439	-2440	-2890	457	2339	450
chr5	74062885	GFM2	ENST00000296805.3	0.681223	311	-146	-147	-2486	-2487	-2937	457	2339	450
chr5	78908393	PAPD4	ENST00000423041.2	0.340741	137	-267	-268	-1710	-1711	-3085	404	1442	1374
chr5	79950633	DHFR	ENST00000439211.2	0.34413	169	-324	-325	-888	-889	-3747	493	563	2858
chr5	88178939	MEF2C	ENST00000437473.2	0.267943	111	-306	-307	-1728	-1729	-3983	417	1421	2254
chr5	89825337	LYSMD3	ENST00000315948.6	0.427586	61	-83	-84	-1004	-1005	-4197	144	920	3192
chr5	90678952	ARRDC3	ENST00000265138.3	0.842697	224	-42	-43	-1287	-1288	-3963	266	1244	2675
chr5	92919298	NR2F1	ENST00000327111.3	0.151749	255	-1431	-1432	-2703	-2704	-3476	1686	1271	772
chr5	94884309	TTC37	ENST00000358746.2	0.846154	252	-46	-47	-4741	-4742	-5453	298	4694	711
chr5	98262170	CHD1	ENST00000284049.3	0.473333	70	-79	-80	-5212	-5213	-5847	149	5132	634
chr5	102465118	PPIP5K2	ENST00000321521.9	0.69459	397	-175	-176	-3844	-3845	-15009	572	3668	11164
chr5	102465223	PPIP5K2	ENST00000321521.9	0.877836	502	-70	-71	-3739	-3740	-14904	572	3668	11164
chr5	102465277	PPIP5K2	ENST00000321521.9	0.972077	556	-16	-17	-3685	-3686	-14850	572	3668	11164
chr5	110409137	TSLP	ENST00000379706.4	0.468401	125	-143	-144	-335	-336	-2285	268	191	1949
chr5	110409144	TSLP	ENST00000379706.4	0.494424	132	-136	-137	-328	-329	-2278	268	191	1949
chr5	110409222	TSLP	ENST00000379706.4	0.784387	210	-58	-59	-250	-251	-2200	268	191	1949
chr5	114879200	FEM1C	ENST00000274457.3	0.983986	552	-9	-10	-1863	-1864	-5260	561	1853	3396
chr5	115177667	AP3S1	ENST00000316788.7	0.879713	489	-67	-68	-649	-650	-1240	556	581	590
chr5	115910012	SEMA6A	ENST00000257414.8	0.321285	79	-169	-170	-3313	-3314	-4176	248	3143	862
chr5	122881231	CSNK1G3	ENST00000345990.4	0.824757	592	-126	-127	-1398	-1399	-3773	718	1271	2374
chr5	122881271	CSNK1G3	ENST00000345990.4	0.880389	632	-86	-87	-1358	-1359	-3733	718	1271	2374
chr5	122881291	CSNK1G3	ENST00000345990.4	0.908206	652	-66	-67	-1338	-1339	-3713	718	1271	2374
chr5	122881318	CSNK1G3	ENST00000345990.4	0.945758	679	-39	-40	-1311	-1312	-3686	718	1271	2374
chr5	130695044	CDC42SE2	ENST00000360515.3	0.739927	403	-142	-143	-397	-398	-3187	545	254	2789
chr5	130695099	CDC42SE2	ENST00000360515.3	0.840659	458	-87	-88	-342	-343	-3132	545	254	2789
chr5	130695102	CDC42SE2	ENST00000360515.3	0.846154	461	-84	-85	-339	-340	-3129	545	254	2789
chr5	130695130	CDC42SE2	ENST00000360515.3	0.897436	489	-56	-57	-311	-312	-3101	545	254	2789
chr5	130695172	CDC42SE2	ENST00000360515.3	0.974359	531	-14	-15	-269	-270	-3059	545	254	2789
chr5	133512614	SKP1	ENST00000353411.6	0.630435	115	-68	-69	-560	-561	-9351	183	491	8790
chr5	135489380	SMAD5	ENST00000545279.1	0.808333	290	-69	-70	-1464	-1465	-6718	359	1394	5253
chr5	139946456	SLC35A4	ENST00000323146.3	0.730804	808	-298	-299	-1273	-1274	-2232	1106	974	958
chr5	139946589	SLC35A4	ENST00000323146.3	0.850949	941	-165	-166	-1140	-1141	-2099	1106	974	958
chr5	139946594	SLC35A4	ENST00000323146.3	0.855465	946	-160	-161	-1135	-1136	-2094	1106	974	958
chr5	139946604	SLC35A4	ENST00000323146.3	0.864499	956	-150	-151	-1125	-1126	-2084	1106	974	958
chr5	139946623	SLC35A4	ENST00000323146.3	0.881662	975	-131	-132	-1106	-1107	-2065	1106	974	958
chr5	139946658	SLC35A4	ENST00000323146.3	0.913279	1010	-96	-97	-1071	-1072	-2030	1106	974	958
chr5	140070897	HARS	ENST00000307633.3	0.911392	71	-7	-8	-1357	-1358	-1708	78	1349	350
chr5	140699626	TAF7	ENST00000313368.5	0.980529	704	-14	-15	-1064	-1065	-1569	718	1049	504
chr5	140699986	TAF7	ENST00000313368.5	0.479833	344	-374	-375	-1424	-1425	-1929	718	1049	504
chr5	147051392	JAKMIP2	ENST00000265272.5	0.952991	445	-22	-23	-2455	-2456	-5555	467	2432	3099
chr5	147051434	JAKMIP2	ENST00000265272.5	0.863248	403	-64	-65	-2497	-2498	-5597	467	2432	3099
chr5	147051449	JAKMIP2	ENST00000265272.5	0.831197	388	-79	-80	-2512	-2513	-5612	467	2432	3099
chr5	147162090	JAKMIP2	ENST00000265272.5	0.532051	248	-219	-220	-2652	-2653	-5752	467	2432	3099
chr5	147162199	JAKMIP2	ENST00000265272.5	0.299145	139	-328	-329	-2761	-2762	-5861	467	2432	3099
chr5	149900745	NDST1	ENST00000261797.6	0.858566	430	-71	-72	-2720	-2721	-7599	501	2648	4878
chr5	175815769	HIGD2A	ENST00000274787.2	0.30137	21	-51	-52	-372	-373	-646	72	320	273
chr5	178986991	RUFY1	ENST00000437570.2	0.861671	298	-48	-49	-1851	-1852	-2343	346	1802	491
chr6	5261014	LYRM4	ENST00000330636.4	0.771845	158	-47	-48	-323	-324	-7153	205	275	6829
chr6	6007037	NRN1	ENST00000244766.2	0.752294	163	-54	-55	-483	-484	-1460	217	428	976
chr6	7313371	SSR1	ENST00000474597.1	0.804598	69	-17	-18	-914	-915	-1738	86	896	823
chr6	13977228	RNF182	ENST00000488300.1	0.76673	400	-122	-123	-866	-867	-3305	522	743	2438
chr6	13977231	RNF182	ENST00000488300.1	0.772467	403	-119	-120	-863	-864	-3302	522	743	2438
chr6	13977312	RNF182	ENST00000488300.1	0.927342	484	-38	-39	-782	-783	-3221	522	743	2438
chr6	13977317	RNF182	ENST00000488300.1	0.936902	489	-33	-34	-777	-778	-3216	522	743	2438
chr6	24718948	C6orf62	ENST00000378119.4	0.976476	2116	-51	-52	-741	-742	-2017	2167	689	1275
chr6	24718962	C6orf62	ENST00000378119.4	0.970018	2102	-65	-66	-755	-756	-2031	2167	689	1275
chr6	24719135	C6orf62	ENST00000378119.4	0.890221	1929	-238	-239	-928	-929	-2204	2167	689	1275
chr6	24719139	C6orf62	ENST00000378119.4	0.888376	1925	-242	-243	-932	-933	-2208	2167	689	1275
chr6	36842573	PPIL1	ENST00000373699.5	0.904762	227	-24	-25	-525	-526	-1511	251	500	985
chr6	41888760	MED20	ENST00000265350.4	0.962963	77	-3	-4	-642	-643	-2360	80	638	1717
chr6	42985293	KLHDC3	ENST00000244670.8	0.786517	349	-95	-96	-842	-843	-1399	444	746	556
chr6	44214910	HSP90AB1	ENST00000353801.3	0.713115	86	-35	-36	-2210	-2211	-2495	121	2174	284
chr6	52850290	GSTA4	ENST00000541324.1	0.913534	242	-23	-24	-413	-414	-927	265	389	513
chr6	52859018	GSTA4	ENST00000541324.1	0.330827	87	-178	-179	-568	-569	-1082	265	389	513
chr6	53213705	ELOVL5	ENST00000304434.6	0.507538	100	-98	-99	-998	-999	-2726	198	899	1727
chr6	64286415	PTP4A1	ENST00000370650.2	0.378151	224	-370	-371	-817	-818	-3069	594	446	2251
chr6	64286454	PTP4A1	ENST00000370650.2	0.443697	263	-331	-332	-778	-779	-3030	594	446	2251
chr6	64286545	PTP4A1	ENST00000370650.2	0.596639	354	-240	-241	-687	-688	-2939	594	446	2251
chr6	64286569	PTP4A1	ENST00000370650.2	0.636975	378	-216	-217	-663	-664	-2915	594	446	2251
chr6	64286595	PTP4A1	ENST00000370650.2	0.680672	404	-190	-191	-637	-638	-2889	594	446	2251
chr6	64286631	PTP4A1	ENST00000370650.2	0.741176	440	-154	-155	-601	-602	-2853	594	446	2251
chr6	64286671	PTP4A1	ENST00000370650.2	0.808403	480	-114	-115	-561	-562	-2813	594	446	2251
chr6	64286721	PTP4A1	ENST00000370650.2	0.892437	530	-64	-65	-511	-512	-2763	594	446	2251
chr6	70500262	LMBRD1	ENST00000370570.1	0.862974	295	-47	-48	-1451	-1452	-1803	342	1403	351
chr6	74171538	MTO1	ENST00000370300.4	0.566667	50	-39	-40	-2193	-2194	-2910	89	2153	716
chr6	74171570	MTO1	ENST00000370300.4	0.922222	82	-7	-8	-2161	-2162	-2878	89	2153	716
chr6	80228649	LCA5	ENST00000369846.4	0.914943	397	-37	-38	-2131	-2132	-4144	434	2093	2012
chr6	80228674	LCA5	ENST00000369846.4	0.857471	372	-62	-63	-2156	-2157	-4169	434	2093	2012
chr6	80228757	LCA5	ENST00000369846.4	0.666667	289	-145	-146	-2239	-2240	-4252	434	2093	2012
chr6	82950232	IBTK	ENST00000306270.7	0.949091	521	-28	-29	-4090	-4091	-5532	549	4061	1441
chr6	82950239	IBTK	ENST00000306270.7	0.936364	514	-35	-36	-4097	-4098	-5539	549	4061	1441
chr6	82950345	IBTK	ENST00000306270.7	0.743636	408	-141	-142	-4203	-4204	-5645	549	4061	1441
chr6	82950457	IBTK	ENST00000306270.7	0.54	296	-253	-254	-4315	-4316	-5757	549	4061	1441
chr6	82950477	IBTK	ENST00000306270.7	0.503636	276	-273	-274	-4335	-4336	-5777	549	4061	1441
chr6	90121584	RRAGD	ENST00000359203.3	0.880342	205	-28	-29	-778	-779	-3836	233	749	3057
chr6	97247615	GPR63	ENST00000229955.3	0.979769	338	-7	-8	-1267	-1268	-5613	345	1259	4345
chr6	97247623	GPR63	ENST00000229955.3	0.956647	330	-15	-16	-1275	-1276	-5621	345	1259	4345
chr6	97247645	GPR63	ENST00000229955.3	0.893064	308	-37	-38	-1297	-1298	-5643	345	1259	4345
chr6	97247647	GPR63	ENST00000229955.3	0.887283	306	-39	-40	-1299	-1300	-5645	345	1259	4345
chr6	97247677	GPR63	ENST00000229955.3	0.800578	276	-69	-70	-1329	-1330	-5675	345	1259	4345
chr6	99374871	FBXL4	ENST00000229971.1	0.98324	351	-6	-7	-1872	-1873	-2425	357	1865	552
chr6	99395740	FBXL4	ENST00000229971.1	0.307263	109	-248	-249	-2114	-2115	-2667	357	1865	552
chr6	100911624	SIM1	ENST00000369208.3	0.643678	503	-279	-280	-2580	-2581	-7926	782	2300	5345
chr6	100911740	SIM1	ENST00000369208.3	0.49553	387	-395	-396	-2696	-2697	-8042	782	2300	5345
chr6	105609789	POPDC3	ENST00000254765.3	0.985663	274	-4	-5	-880	-881	-1070	278	875	189
chr6	105609814	POPDC3	ENST00000254765.3	0.896057	249	-29	-30	-905	-906	-1095	278	875	189
chr6	105609817	POPDC3	ENST00000254765.3	0.885305	246	-32	-33	-908	-909	-1098	278	875	189
chr6	105609915	POPDC3	ENST00000254765.3	0.53405	148	-130	-131	-1006	-1007	-1196	278	875	189
chr6	105609941	POPDC3	ENST00000254765.3	0.44086	122	-156	-157	-1032	-1033	-1222	278	875	189
chr6	107077126	RTN4IP1	ENST00000369063.3	0.508584	236	-229	-230	-1420	-1421	-1445	465	1190	24
chr6	109190143	ARMC2	ENST00000368972.3	0.854027	508	-87	-88	-2196	-2197	-2464	595	2108	267
chr6	111196010	AMD1	ENST00000368877.5	0.0716511	22	-298	-299	-1216	-1217	-1582	320	917	365
chr6	111196077	AMD1	ENST00000368877.5	0.280374	89	-231	-232	-1149	-1150	-1515	320	917	365
chr6	111196116	AMD1	ENST00000368877.5	0.401869	128	-192	-193	-1110	-1111	-1476	320	917	365
chr6	111279912	GTF3C6	ENST00000329970.7	0.714286	149	-60	-61	-702	-703	-802	209	641	99
chr6	111498546	SLC16A10	ENST00000368850.3	0.271605	131	-354	-355	-960	-961	-9919	485	605	8958
chr6	111498565	SLC16A10	ENST00000368850.3	0.3107	150	-335	-336	-941	-942	-9900	485	605	8958
chr6	111498567	SLC16A10	ENST00000368850.3	0.314815	152	-333	-334	-939	-940	-9898	485	605	8958
chr6	114292022	HDAC2	ENST00000368632.2	0.817439	299	-67	-68	-1444	-1445	-1784	366	1376	339
chr6	114292175	HDAC2	ENST00000368632.2	0.400545	146	-220	-221	-1597	-1598	-1937	366	1376	339
chr6	116892775	RWDD1	ENST00000392526.1	0.278499	192	-500	-501	-944	-945	-1112	692	443	167
chr6	116895251	RWDD1	ENST00000392526.1	0.569986	394	-298	-299	-742	-743	-910	692	443	167
chr6	119215450	ASF1A	ENST00000229595.5	0.345361	66	-127	-128	-742	-743	-2295	193	614	1552
chr6	119215468	ASF1A	ENST00000229595.5	0.438144	84	-109	-110	-724	-725	-2277	193	614	1552
chr6	126102351	NCOA7	ENST00000368357.3	0.127841	44	-307	-308	-3136	-3137	-5476	351	2828	2339
chr6	126102506	NCOA7	ENST00000368357.3	0.568182	199	-152	-153	-2981	-2982	-5321	351	2828	2339
chr6	126102509	NCOA7	ENST00000368357.3	0.576705	202	-149	-150	-2978	-2979	-5318	351	2828	2339
chr6	133119601	SLC18B1	ENST00000275227.4	0.948454	91	-5	-6	-1376	-1377	-2276	96	1370	899
chr6	136570242	MTFR2	ENST00000420702.1	0.989744	385	-4	-5	-1162	-1163	-1407	389	1157	244
chr6	142468476	VTA1	ENST00000367621.1	0.754545	82	-27	-28	-777	-778	-1201	109	749	423
chr6	144269420	PLAGL1	ENST00000354765.2	0.824519	685	-146	-147	-1538	-1539	-2660	831	1391	1121
chr6	150023307	LATS1	ENST00000543571.1	0.919708	503	-44	-45	-3437	-3438	-7013	547	3392	3575
chr6	150023337	LATS1	ENST00000543571.1	0.864964	473	-74	-75	-3467	-3468	-7043	547	3392	3575
chr6	150023371	LATS1	ENST00000543571.1	0.80292	439	-108	-109	-3501	-3502	-7077	547	3392	3575
chr6	155153864	TIAM2	ENST00000461783.3	0.0267086	33	-1239	-1240	-6345	-6346	-6947	1272	5105	601
chr6	155153948	TIAM2	ENST00000461783.3	0.0926944	117	-1155	-1156	-6261	-6262	-6863	1272	5105	601
chr6	155153978	TIAM2	ENST00000461783.3	0.116261	147	-1125	-1126	-6231	-6232	-6833	1272	5105	601
chr6	155154062	TIAM2	ENST00000461783.3	0.182247	231	-1041	-1042	-6147	-6148	-6749	1272	5105	601
chr6	155154151	TIAM2	ENST00000461783.3	0.25216	320	-952	-953	-6058	-6059	-6660	1272	5105	601
chr6	155154176	TIAM2	ENST00000461783.3	0.271799	345	-927	-928	-6033	-6034	-6635	1272	5105	601
chr6	155154251	TIAM2	ENST00000461783.3	0.330715	420	-852	-853	-5958	-5959	-6560	1272	5105	601
chr6	155154256	TIAM2	ENST00000461783.3	0.334643	425	-847	-848	-5953	-5954	-6555	1272	5105	601
chr6	155154268	TIAM2	ENST00000461783.3	0.344069	437	-835	-836	-5941	-5942	-6543	1272	5105	601
chr6	155154278	TIAM2	ENST00000461783.3	0.351925	447	-825	-826	-5931	-5932	-6533	1272	5105	601
chr6	155154326	TIAM2	ENST00000461783.3	0.389631	495	-777	-778	-5883	-5884	-6485	1272	5105	601
chr6	155154329	TIAM2	ENST00000461783.3	0.391987	498	-774	-775	-5880	-5881	-6482	1272	5105	601
chr6	155154369	TIAM2	ENST00000461783.3	0.423409	538	-734	-735	-5840	-5841	-6442	1272	5105	601
chr6	155154377	TIAM2	ENST00000461783.3	0.429694	546	-726	-727	-5832	-5833	-6434	1272	5105	601
chr6	155154389	TIAM2	ENST00000461783.3	0.43912	558	-714	-715	-5820	-5821	-6422	1272	5105	601
chr6	155154413	TIAM2	ENST00000461783.3	0.457973	582	-690	-691	-5796	-5797	-6398	1272	5105	601
chr6	155154435	TIAM2	ENST00000461783.3	0.475255	604	-668	-669	-5774	-5775	-6376	1272	5105	601
chr6	155154438	TIAM2	ENST00000461783.3	0.477612	607	-665	-666	-5771	-5772	-6373	1272	5105	601
chr6	155154454	TIAM2	ENST00000461783.3	0.490181	623	-649	-650	-5755	-5756	-6357	1272	5105	601
chr6	155154469	TIAM2	ENST00000461783.3	0.501964	638	-634	-635	-5740	-5741	-6342	1272	5105	601
chr6	155154494	TIAM2	ENST00000461783.3	0.521603	663	-609	-610	-5715	-5716	-6317	1272	5105	601
chr6	155154531	TIAM2	ENST00000461783.3	0.550668	700	-572	-573	-5678	-5679	-6280	1272	5105	601
chr6	155154536	TIAM2	ENST00000461783.3	0.554595	705	-567	-568	-5673	-5674	-6275	1272	5105	601
chr6	158733861	TULP4	ENST00000367094.2	0.125276	169	-1187	-1188	-3224	-3225	-5000	1356	2036	1775
chr6	159058832	DYNLT1	ENST00000367088.1	0.720202	1564	-608	-609	-812	-813	-1326	2172	203	513
chr6	159058836	DYNLT1	ENST00000367088.1	0.718362	1560	-612	-613	-816	-817	-1330	2172	203	513
chr6	161653288	AGPAT4	ENST00000320285.4	0.802817	170	-42	-43	-1179	-1180	-7694	212	1136	6514
chr7	4917778	RADIL	ENST00000399583.3	0.962766	180	-7	-8	-3235	-3236	-3508	187	3227	272
chr7	6370828	FAM220A	ENST00000313324.4	0.910256	425	-42	-43	-822	-823	-1788	467	779	965
chr7	6523708	KDELR2	ENST00000258739.4	0.897297	165	-19	-20	-658	-659	-2718	184	638	2059
chr7	6617289	ZDHHC4	ENST00000396706.2	0.34763	153	-289	-290	-1324	-1325	-1788	442	1034	463
chr7	8275576	ICA1	ENST00000265577.7	0.901042	172	-19	-20	-1468	-1469	-2136	191	1448	667
chr7	23509731	IGF2BP3	ENST00000258729.3	0.997199	355	-1	-2	-1741	-1742	-3894	356	1739	2152
chr7	23509733	IGF2BP3	ENST00000258729.3	0.991597	353	-3	-4	-1743	-1744	-3896	356	1739	2152
chr7	23509736	IGF2BP3	ENST00000258729.3	0.983193	350	-6	-7	-1746	-1747	-3899	356	1739	2152
chr7	23509744	IGF2BP3	ENST00000258729.3	0.960784	342	-14	-15	-1754	-1755	-3907	356	1739	2152
chr7	23509817	IGF2BP3	ENST00000258729.3	0.756303	269	-87	-88	-1827	-1828	-3980	356	1739	2152
chr7	23509856	IGF2BP3	ENST00000258729.3	0.647059	230	-126	-127	-1866	-1867	-4019	356	1739	2152
chr7	23509991	IGF2BP3	ENST00000258729.3	0.268908	95	-261	-262	-2001	-2002	-4154	356	1739	2152
chr7	23650886	CCDC126	ENST00000307471.3	0.894967	408	-48	-49	-471	-472	-2064	456	422	1592
chr7	23650896	CCDC126	ENST00000307471.3	0.916849	418	-38	-39	-461	-462	-2054	456	422	1592
chr7	23650927	CCDC126	ENST00000307471.3	0.984683	449	-7	-8	-430	-431	-2023	456	422	1592
chr7	32919252	KBTBD2	ENST00000304056.4	0.95	664	-35	-36	-1907	-1908	-3080	699	1871	1172
chr7	32919305	KBTBD2	ENST00000304056.4	0.874286	611	-88	-89	-1960	-1961	-3133	699	1871	1172
chr7	32919373	KBTBD2	ENST00000304056.4	0.777143	543	-156	-157	-2028	-2029	-3201	699	1871	1172
chr7	32919455	KBTBD2	ENST00000304056.4	0.66	461	-238	-239	-2110	-2111	-3283	699	1871	1172
chr7	35734036	HERPUD2	ENST00000396081.1	0.881988	709	-95	-96	-1316	-1317	-2347	804	1220	1030
chr7	35734066	HERPUD2	ENST00000396081.1	0.84472	679	-125	-126	-1346	-1347	-2377	804	1220	1030
chr7	35734103	HERPUD2	ENST00000396081.1	0.798758	642	-162	-163	-1383	-1384	-2414	804	1220	1030
chr7	37382318	ELMO1	ENST00000310758.4	0.964506	624	-23	-24	-2207	-2208	-3397	647	2183	1189
chr7	44161713	POLD2	ENST00000223361.3	0.58042	82	-60	-61	-1428	-1429	-1514	142	1367	85
chr7	44838374	PPIA	ENST00000355968.6	0.484536	140	-150	-151	-468	-469	-677	290	317	208
chr7	50517292	FIGNL1	ENST00000356889.4	0.495177	153	-157	-158	-2182	-2183	-3312	310	2024	1129
chr7	56119486	CCT6A	ENST00000275603.4	0.748858	163	-55	-56	-1651	-1652	-2555	218	1595	903
chr7	64275403	ZNF138	ENST00000359735.3	0.827089	286	-60	-61	-849	-850	-2295	346	788	1445
chr7	65705337	TPST1	ENST00000304842.5	0.823529	349	-75	-76	-1188	-1189	-1766	424	1112	577
chr7	65705359	TPST1	ENST00000304842.5	0.875294	371	-53	-54	-1166	-1167	-1744	424	1112	577
chr7	65705395	TPST1	ENST00000304842.5	0.96	407	-17	-18	-1130	-1131	-1708	424	1112	577
chr7	65705409	TPST1	ENST00000304842.5	0.992941	421	-3	-4	-1116	-1117	-1694	424	1112	577
chr7	83277975	SEMA3E	ENST00000307792.3	0.752137	351	-116	-117	-2444	-2445	-6124	467	2327	3679
chr7	91570309	AKAP9	ENST00000356239.3	0.553648	128	-104	-105	-11828	-11829	-12342	232	11723	513
chr7	93220955	GNGT1	ENST00000455502.1	0.279528	70	-183	-184	-324	-325	-1872	253	140	1547
chr7	95951347	SLC25A13	ENST00000265631.5	0.430657	58	-78	-79	-2106	-2107	-3077	136	2027	970
chr7	99097795	ZNF394	ENST00000337673.6	0.617647	125	-78	-79	-1764	-1765	-2053	203	1685	288
chr7	99103651	ZKSCAN5	ENST00000326775.5	0.869919	106	-16	-17	-2536	-2537	-4071	122	2519	1534
chr7	108155961	PNPLA8	ENST00000257694.8	0.915254	269	-25	-26	-2374	-2375	-3220	294	2348	845
chr7	108210021	THAP5	ENST00000415914.3	0.954545	146	-7	-8	-1195	-1196	-3159	153	1187	1963
chr7	120496819	TSPAN12	ENST00000222747.3	0.998355	606	-1	-2	-919	-920	-2189	607	917	1269
chr7	120497915	TSPAN12	ENST00000222747.3	0.817434	496	-111	-112	-1029	-1030	-2299	607	917	1269
chr7	120590902	ING3	ENST00000315870.5	0.675676	99	-48	-49	-1305	-1306	-3677	147	1256	2371
chr7	120590904	ING3	ENST00000315870.5	0.689189	101	-46	-47	-1303	-1304	-3675	147	1256	2371
chr7	124538322	POT1	ENST00000357628.3	0.923205	552	-46	-47	-1951	-1952	-3527	598	1904	1575
chr7	124538379	POT1	ENST00000357628.3	0.828047	495	-103	-104	-2008	-2009	-3584	598	1904	1575
chr7	128388338	CALU	ENST00000479257.1	0.915764	760	-70	-71	-1042	-1043	-1811	830	971	768
chr7	134001691	SLC35B4	ENST00000378509.4	0.376667	112	-187	-188	-1183	-1184	-6684	299	995	5500
chr7	134331629	BPGM	ENST00000344924.3	0.366492	69	-121	-122	-901	-902	-1683	190	779	781
chr7	134853758	C7orf49	ENST00000393114.3	0.543956	98	-83	-84	-557	-558	-1383	181	473	825
chr7	139025932	C7orf55	ENST00000297534.6	0.217391	54	-198	-199	-540	-541	-1155	252	341	614
chr7	148427167	CUL1	ENST00000325222.4	0.831541	231	-47	-48	-2378	-2379	-2832	278	2330	453
chr8	17102665	CNOT7	ENST00000361272.4	0.989967	295	-3	-4	-861	-862	-2353	298	857	1491
chr8	17780590	PCM1	ENST00000325083.8	0.551253	241	-197	-198	-6272	-6273	-6578	438	6074	305
chr8	23147661	R3HCC1	ENST00000265806.6	0.963812	798	-30	-31	-792	-793	-974	828	761	181
chr8	26366315	PNMA2	ENST00000522362.2	0.951955	851	-43	-44	-1138	-1139	-4113	894	1094	2974
chr8	27630114	CCDC25	ENST00000356537.4	0.404255	37	-56	-57	-683	-684	-3581	93	626	2897
chr8	28360340	FZD3	ENST00000240093.3	0.60251	287	-190	-191	-2191	-2192	-13438	477	2000	11246
chr8	28360374	FZD3	ENST00000240093.3	0.67364	321	-156	-157	-2157	-2158	-13404	477	2000	11246
chr8	28360421	FZD3	ENST00000240093.3	0.771967	368	-109	-110	-2110	-2111	-13357	477	2000	11246
chr8	28360431	FZD3	ENST00000240093.3	0.792887	378	-99	-100	-2100	-2101	-13347	477	2000	11246
chr8	28360456	FZD3	ENST00000240093.3	0.845188	403	-74	-75	-2075	-2076	-13322	477	2000	11246
chr8	28360475	FZD3	ENST00000240093.3	0.884937	422	-55	-56	-2056	-2057	-13303	477	2000	11246
chr8	28360483	FZD3	ENST00000240093.3	0.901674	430	-47	-48	-2048	-2049	-13295	477	2000	11246
chr8	28360505	FZD3	ENST00000240093.3	0.947699	452	-25	-26	-2026	-2027	-13273	477	2000	11246
chr8	28360511	FZD3	ENST00000240093.3	0.960251	458	-19	-20	-2020	-2021	-13267	477	2000	11246
chr8	28360521	FZD3	ENST00000240093.3	0.981172	468	-9	-10	-2010	-2011	-13257	477	2000	11246
chr8	33370197	TTI2	ENST00000360742.5	0.868952	430	-65	-66	-1592	-1593	-1811	495	1526	218
chr8	33370463	TTI2	ENST00000360742.5	0.332661	164	-331	-332	-1858	-1859	-2077	495	1526	218
chr8	38034093	LSM1	ENST00000311351.4	0.358586	141	-254	-255	-656	-657	-1005	395	401	348
chr8	38034104	LSM1	ENST00000311351.4	0.330808	130	-265	-266	-667	-668	-1016	395	401	348
chr8	38853026	TM2D2	ENST00000412303.1	0.992405	391	-3	-4	-519	-520	-3043	394	515	2523
chr8	38853123	TM2D2	ENST00000412303.1	0.746835	294	-100	-101	-616	-617	-3140	394	515	2523
chr8	38853194	TM2D2	ENST00000412303.1	0.567089	223	-171	-172	-687	-688	-3211	394	515	2523
chr8	41455898	AGPAT6	ENST00000396987.3	0.180151	166	-760	-761	-2131	-2132	-6131	926	1370	3999
chr8	41455964	AGPAT6	ENST00000396987.3	0.251348	232	-694	-695	-2065	-2066	-6065	926	1370	3999
chr8	41456069	AGPAT6	ENST00000396987.3	0.364617	337	-589	-590	-1960	-1961	-5960	926	1370	3999
chr8	41456112	AGPAT6	ENST00000396987.3	0.411003	380	-546	-547	-1917	-1918	-5917	926	1370	3999
chr8	41456129	AGPAT6	ENST00000396987.3	0.429342	397	-529	-530	-1900	-1901	-5900	926	1370	3999
chr8	41456150	AGPAT6	ENST00000396987.3	0.451996	418	-508	-509	-1879	-1880	-5879	926	1370	3999
chr8	41456221	AGPAT6	ENST00000396987.3	0.528587	489	-437	-438	-1808	-1809	-5808	926	1370	3999
chr8	41456228	AGPAT6	ENST00000396987.3	0.536138	496	-430	-431	-1801	-1802	-5801	926	1370	3999
chr8	41456320	AGPAT6	ENST00000396987.3	0.635383	588	-338	-339	-1709	-1710	-5709	926	1370	3999
chr8	41456352	AGPAT6	ENST00000396987.3	0.669903	620	-306	-307	-1677	-1678	-5677	926	1370	3999
chr8	41456358	AGPAT6	ENST00000396987.3	0.676375	626	-300	-301	-1671	-1672	-5671	926	1370	3999
chr8	41456389	AGPAT6	ENST00000396987.3	0.709817	657	-269	-270	-1640	-1641	-5640	926	1370	3999
chr8	41456559	AGPAT6	ENST00000396987.3	0.893204	827	-99	-100	-1470	-1471	-5470	926	1370	3999
chr8	41906509	KAT6A	ENST00000265713.2	0.968447	398	-13	-14	-6028	-6029	-8754	411	6014	2725
chr8	41906522	KAT6A	ENST00000265713.2	0.936893	385	-26	-27	-6041	-6042	-8767	411	6014	2725
chr8	41906525	KAT6A	ENST00000265713.2	0.929612	382	-29	-30	-6044	-6045	-8770	411	6014	2725
chr8	41906548	KAT6A	ENST00000265713.2	0.873786	359	-52	-53	-6067	-6068	-8793	411	6014	2725
chr8	41906690	KAT6A	ENST00000265713.2	0.529126	217	-194	-195	-6209	-6210	-8935	411	6014	2725
chr8	42397219	SMIM19	ENST00000417410.2	0.609091	468	-301	-302	-625	-626	-997	769	323	371
chr8	42912181	FNTA	ENST00000529687.1	0.412162	365	-522	-523	-1209	-1210	-1584	887	686	374
chr8	42919300	FNTA	ENST00000529687.1	0.876126	777	-110	-111	-797	-798	-1172	887	686	374
chr8	49833885	SNAI2	ENST00000020945.1	0.634146	103	-60	-61	-867	-868	-1984	163	806	1116
chr8	52811552	PCMTD1	ENST00000360540.5	0.262899	106	-300	-301	-1374	-1375	-4145	406	1073	2770
chr8	53599424	RB1CC1	ENST00000025008.5	0.881679	461	-62	-63	-4847	-4848	-6173	523	4784	1325
chr8	53599426	RB1CC1	ENST00000025008.5	0.877863	459	-64	-65	-4849	-4850	-6175	523	4784	1325
chr8	53599453	RB1CC1	ENST00000025008.5	0.826336	432	-91	-92	-4876	-4877	-6202	523	4784	1325
chr8	53599473	RB1CC1	ENST00000025008.5	0.788168	412	-111	-112	-4896	-4897	-6222	523	4784	1325
chr8	53626710	RB1CC1	ENST00000025008.5	0.540076	282	-241	-242	-5026	-5027	-6352	523	4784	1325
chr8	56675529	TMEM68	ENST00000334667.2	0.960474	242	-10	-11	-784	-785	-2158	252	773	1373
chr8	56986947	RPS20	ENST00000009589.3	0.96748	118	-4	-5	-364	-365	-507	122	359	142
chr8	61591420	CHD7	ENST00000423902.2	0.175365	83	-395	-396	-9389	-9390	-10362	478	8993	972
chr8	61591429	CHD7	ENST00000423902.2	0.194154	92	-386	-387	-9380	-9381	-10353	478	8993	972
chr8	61591448	CHD7	ENST00000423902.2	0.23382	111	-367	-368	-9361	-9362	-10334	478	8993	972
chr8	61591483	CHD7	ENST00000423902.2	0.306889	146	-332	-333	-9326	-9327	-10299	478	8993	972
chr8	61591575	CHD7	ENST00000423902.2	0.498956	238	-240	-241	-9234	-9235	-10207	478	8993	972
chr8	61653881	CHD7	ENST00000423902.2	0.770355	368	-110	-111	-9104	-9105	-10077	478	8993	972
chr8	66582152	MTFR1	ENST00000262146.4	0.722222	90	-35	-36	-1037	-1038	-2549	125	1001	1511
chr8	70744960	SLCO5A1	ENST00000260126.4	0.927864	655	-51	-52	-2598	-2599	-8420	706	2546	5821
chr8	70744998	SLCO5A1	ENST00000260126.4	0.874116	617	-89	-90	-2636	-2637	-8458	706	2546	5821
chr8	77912257	PEX2	ENST00000357039.4	0.520202	205	-190	-191	-1108	-1109	-4111	395	917	3002
chr8	90921861	OSGIN2	ENST00000297438.2	0.940845	333	-21	-22	-1539	-1540	-3875	354	1517	2335
chr8	97285571	PTDSS1	ENST00000455950.2	0.888889	351	-44	-45	-1028	-1029	-2008	395	983	979
chr8	101300412	RNF19A	ENST00000341084.2	0.983755	544	-9	-10	-2526	-2527	-3740	553	2516	1213
chr8	101733976	PABPC1	ENST00000318607.5	0.854739	964	-164	-165	-2075	-2076	-2520	1128	1910	444
chr8	101734127	PABPC1	ENST00000318607.5	0.720992	813	-315	-316	-2226	-2227	-2671	1128	1910	444
chr8	101734141	PABPC1	ENST00000318607.5	0.708592	799	-329	-330	-2240	-2241	-2685	1128	1910	444
chr8	101734144	PABPC1	ENST00000318607.5	0.705934	796	-332	-333	-2243	-2244	-2688	1128	1910	444
chr8	101734147	PABPC1	ENST00000318607.5	0.703277	793	-335	-336	-2246	-2247	-2691	1128	1910	444
chr8	101734161	PABPC1	ENST00000318607.5	0.690877	779	-349	-350	-2260	-2261	-2705	1128	1910	444
chr8	103855907	AZIN1	ENST00000337198.5	0.977663	1137	-26	-27	-1373	-1374	-3583	1163	1346	2209
chr8	103855928	AZIN1	ENST00000337198.5	0.959622	1116	-47	-48	-1394	-1395	-3604	1163	1346	2209
chr8	103876055	AZIN1	ENST00000337198.5	0.782646	910	-253	-254	-1600	-1601	-3810	1163	1346	2209
chr8	110552675	EBAG9	ENST00000337573.5	0.9	269	-30	-31	-672	-673	-2109	299	641	1436
chr8	121457435	MRPL13	ENST00000306185.3	0.657534	191	-100	-101	-637	-638	-894	291	536	256
chr8	124268201	ZHX1	ENST00000297857.2	0.973333	510	-14	-15	-2636	-2637	-4503	524	2621	1866
chr8	124268211	ZHX1	ENST00000297857.2	0.954286	500	-24	-25	-2646	-2647	-4513	524	2621	1866
chr8	124268214	ZHX1	ENST00000297857.2	0.948571	497	-27	-28	-2649	-2650	-4516	524	2621	1866
chr8	124268216	ZHX1	ENST00000297857.2	0.944762	495	-29	-30	-2651	-2652	-4518	524	2621	1866
chr8	124268230	ZHX1	ENST00000297857.2	0.918095	481	-43	-44	-2665	-2666	-4532	524	2621	1866
chr8	124268243	ZHX1	ENST00000297857.2	0.893333	468	-56	-57	-2678	-2679	-4545	524	2621	1866
chr8	124268250	ZHX1	ENST00000297857.2	0.88	461	-63	-64	-2685	-2686	-4552	524	2621	1866
chr8	124268277	ZHX1	ENST00000297857.2	0.828571	434	-90	-91	-2712	-2713	-4579	524	2621	1866
chr8	124268278	ZHX1	ENST00000297857.2	0.826667	433	-91	-92	-2713	-2714	-4580	524	2621	1866
chr8	124268297	ZHX1	ENST00000297857.2	0.790476	414	-110	-111	-2732	-2733	-4599	524	2621	1866
chr8	124279537	ZHX1	ENST00000297857.2	0.525714	275	-249	-250	-2871	-2872	-4738	524	2621	1866
chr8	124279537	ZHX1-C8ORF76	ENST00000357082.4	0.968085	90	-3	-4	-882	-883	-1164	93	878	281
chr8	124279574	ZHX1	ENST00000297857.2	0.455238	238	-286	-287	-2908	-2909	-4775	524	2621	1866
chr8	124279574	ZHX1-C8ORF76	ENST00000357082.4	0.574468	53	-40	-41	-919	-920	-1201	93	878	281
chr8	126011114	SQLE	ENST00000265896.5	0.408686	366	-531	-532	-2256	-2257	-2594	897	1724	337
chr8	126011433	SQLE	ENST00000265896.5	0.76392	685	-212	-213	-1937	-1938	-2275	897	1724	337
chr8	126011529	SQLE	ENST00000265896.5	0.870824	781	-116	-117	-1841	-1842	-2179	897	1724	337
chr8	126114335	NSMCE2	ENST00000287437.3	0.689815	148	-67	-68	-811	-812	-1046	215	743	234
chr8	126114344	NSMCE2	ENST00000287437.3	0.731481	157	-58	-59	-802	-803	-1037	215	743	234
chr8	128748675	MYC	ENST00000259523.6	0.826556	995	-209	-210	-983	-984	-1046	1204	773	62
chr8	128748707	MYC	ENST00000259523.6	0.853112	1027	-177	-178	-951	-952	-1014	1204	773	62
chr8	128748748	MYC	ENST00000259523.6	0.887137	1068	-136	-137	-910	-911	-973	1204	773	62
chr8	128748780	MYC	ENST00000259523.6	0.913693	1100	-104	-105	-878	-879	-941	1204	773	62
chr8	128748852	MYC	ENST00000259523.6	0.973444	1172	-32	-33	-806	-807	-869	1204	773	62
chr8	133816975	PHF20L1	ENST00000220847.7	0.447934	812	-1002	-1003	-2217	-2218	-2921	1814	1214	703
chr8	134488631	ST3GAL1	ENST00000319914.5	0.646887	664	-363	-364	-1386	-1387	-6302	1027	1022	4915
chr8	142431720	PTP4A3	ENST00000520105.1	0.342524	322	-620	-621	-1067	-1068	-1543	942	446	475
chr8	142431866	PTP4A3	ENST00000520105.1	0.497349	468	-474	-475	-921	-922	-1397	942	446	475
chr8	142432028	PTP4A3	ENST00000520105.1	0.669141	630	-312	-313	-759	-760	-1235	942	446	475
chr8	142432136	PTP4A3	ENST00000520105.1	0.783669	738	-204	-205	-651	-652	-1127	942	446	475
chr8	142432226	PTP4A3	ENST00000520105.1	0.879109	828	-114	-115	-561	-562	-1037	942	446	475
chr9	710892	KANK1	ENST00000382293.3	0.562814	447	-348	-349	-3933	-3934	-4801	795	3584	867
chr9	710923	KANK1	ENST00000382293.3	0.601759	478	-317	-318	-3902	-3903	-4770	795	3584	867
chr9	5436611	PLGRKT	ENST00000223864.2	0.783784	173	-48	-49	-492	-493	-758	221	443	265
chr9	12775101	LURAP1L	ENST00000319264.3	0.117986	81	-613	-614	-1300	-1301	-1671	694	686	370
chr9	12775148	LURAP1L	ENST00000319264.3	0.185612	128	-566	-567	-1253	-1254	-1624	694	686	370
chr9	12775350	LURAP1L	ENST00000319264.3	0.476259	330	-364	-365	-1051	-1052	-1422	694	686	370
chr9	12775690	LURAP1L	ENST00000319264.3	0.965468	670	-24	-25	-711	-712	-1082	694	686	370
chr9	21335342	KLHL9	ENST00000359039.4	0.0729367	37	-483	-484	-2337	-2338	-5672	520	1853	3334
chr9	32493851	DDX58	ENST00000379868.1	0.741551	372	-130	-131	-2299	-2300	-3716	502	2168	1416
chr9	33265060	CHMP5	ENST00000223500.8	0.883212	120	-16	-17	-676	-677	-1356	136	659	679
chr9	37899900	SLC25A51	ENST00000242275.6	0.495652	113	-116	-117	-1010	-1011	-1016	229	893	5
chr9	79009146	RFK	ENST00000376736.1	0.826347	275	-58	-59	-526	-527	-2408	333	467	1881
chr9	79115896	GCNT1	ENST00000376730.4	0.536232	258	-224	-225	-1511	-1512	-5259	482	1286	3747
chr9	79115959	GCNT1	ENST00000376730.4	0.666667	321	-161	-162	-1448	-1449	-5196	482	1286	3747
chr9	88959964	ZCCHC6	ENST00000277141.6	0.451959	1095	-1329	-1330	-3684	-3685	-4628	2424	2354	943
chr9	88967655	ZCCHC6	ENST00000277141.6	0.260206	630	-1794	-1795	-4149	-4150	-5093	2424	2354	943
chr9	88967715	ZCCHC6	ENST00000277141.6	0.235464	570	-1854	-1855	-4209	-4210	-5153	2424	2354	943
chr9	88967782	ZCCHC6	ENST00000277141.6	0.207835	503	-1921	-1922	-4276	-4277	-5220	2424	2354	943
chr9	88967795	ZCCHC6	ENST00000277141.6	0.202474	490	-1934	-1935	-4289	-4290	-5233	2424	2354	943
chr9	88967863	ZCCHC6	ENST00000277141.6	0.174433	422	-2002	-2003	-4357	-4358	-5301	2424	2354	943
chr9	88967924	ZCCHC6	ENST00000277141.6	0.149278	361	-2063	-2064	-4418	-4419	-5362	2424	2354	943
chr9	91933444	SECISBP2	ENST00000339901.4	0.0705128	10	-145	-146	-2491	-2492	-3309	155	2345	817
chr9	91933467	SECISBP2	ENST00000339901.4	0.217949	33	-122	-123	-2468	-2469	-3286	155	2345	817
chr9	95012482	IARS	ENST00000375629.3	0.889764	2598	-322	-323	-847	-848	-1783	2920	524	935
chr9	95013094	IARS	ENST00000375629.3	0.82506	2409	-511	-512	-1036	-1037	-1972	2920	524	935
chr9	95019059	IARS	ENST00000375629.3	0.725779	2119	-801	-802	-1326	-1327	-2262	2920	524	935
chr9	95021154	IARS	ENST00000375629.3	0.7114	2077	-843	-844	-1368	-1369	-2304	2920	524	935
chr9	95033889	IARS	ENST00000375629.3	0.383088	1118	-1802	-1803	-2327	-2328	-3263	2920	524	935
chr9	95048041	IARS	ENST00000375629.3	0.219103	639	-2281	-2282	-2806	-2807	-3742	2920	524	935
chr9	95051634	IARS	ENST00000375629.3	0.0506676	147	-2773	-2774	-3298	-3299	-4234	2920	524	935
chr9	96215181	FAM120AOS	ENST00000375412.5	0.785957	693	-189	-190	-960	-961	-2077	882	770	1116
chr9	96215206	FAM120AOS	ENST00000375412.5	0.757644	668	-214	-215	-985	-986	-2102	882	770	1116
chr9	96215208	FAM120AOS	ENST00000375412.5	0.755379	666	-216	-217	-987	-988	-2104	882	770	1116
chr9	96215258	FAM120AOS	ENST00000375412.5	0.698754	616	-266	-267	-1037	-1038	-2154	882	770	1116
chr9	96215270	FAM120AOS	ENST00000375412.5	0.685164	604	-278	-279	-1049	-1050	-2166	882	770	1116
chr9	96215351	FAM120AOS	ENST00000375412.5	0.593431	523	-359	-360	-1130	-1131	-2247	882	770	1116
chr9	96215486	FAM120AOS	ENST00000375412.5	0.440544	388	-494	-495	-1265	-1266	-2382	882	770	1116
chr9	96215504	FAM120AOS	ENST00000375412.5	0.420159	370	-512	-513	-1283	-1284	-2400	882	770	1116
chr9	104239388	TMEM246	ENST00000374847.1	0.956811	287	-13	-14	-1225	-1226	-3935	300	1211	2709
chr9	106856736	SMC2	ENST00000286398.7	0.680556	195	-92	-93	-3686	-3687	-5780	287	3593	2093
chr9	108467923	TMEM38B	ENST00000374688.1	0.994366	705	-4	-5	-718	-719	-3250	709	713	2531
chr9	123837308	CNTRL	ENST00000373855.1	0.0730769	18	-241	-242	-7219	-7220	-7641	259	6977	421
chr9	123842738	CNTRL	ENST00000373855.1	0.811538	210	-49	-50	-7027	-7028	-7449	259	6977	421
chr9	125659790	RC3H2	ENST00000373670.1	0.998336	599	-1	-2	-3577	-3578	-8648	600	3575	5070
chr9	125946489	STRBP	ENST00000348403.5	0.825581	354	-75	-76	-2094	-2095	-2980	429	2018	885
chr9	125946491	STRBP	ENST00000348403.5	0.82093	352	-77	-78	-2096	-2097	-2982	429	2018	885
chr9	134378446	POMT1	ENST00000341012.7	0.72449	141	-54	-55	-2070	-2071	-2770	195	2015	699
chr9	138392193	C9orf116	ENST00000371789.3	0.257871	171	-495	-496	-774	-775	-1106	666	278	331
chr9	140512433	C9orf37	ENST00000371417.3	0.913124	493	-47	-48	-578	-579	-915	540	530	336
chr9	140512437	C9orf37	ENST00000371417.3	0.90573	489	-51	-52	-582	-583	-919	540	530	336
chr9	140512502	C9orf37	ENST00000371417.3	0.785582	424	-116	-117	-647	-648	-984	540	530	336
chr9	140513054	C9orf37	ENST00000371417.3	0.391867	211	-329	-330	-860	-861	-1197	540	530	336
chr9	140513086	C9orf37	ENST00000371417.3	0.332717	179	-361	-362	-892	-893	-1229	540	530	336
chr9	140513172	C9orf37	ENST00000371417.3	0.173752	93	-447	-448	-978	-979	-1315	540	530	336
chrX	14883652	FANCB	ENST00000324138.3	0.876623	134	-19	-20	-2599	-2600	-2759	153	2579	159
chrX	40982830	USP9X	ENST00000324545.8	0.919431	581	-51	-52	-7764	-7765	-11819	632	7712	4054
chrX	48382135	EBP	ENST00000495186.1	0.970838	798	-24	-25	-717	-718	-976	822	692	258
chrX	55478768	MAGEH1	ENST00000342972.1	0.855556	230	-39	-40	-699	-700	-1230	269	659	530
chrX	57147765	SPIN2B	ENST00000275988.5	0.784314	159	-44	-45	-821	-822	-992	203	776	170
chrX	62570961	SPIN4	ENST00000335144.3	0.496154	257	-262	-263	-1012	-1013	-3854	519	749	2841
chrX	62974516	ARHGEF9	ENST00000253401.6	0.596754	477	-323	-324	-1874	-1875	-4935	800	1550	3060
chrX	69353641	IGBP1	ENST00000342206.6	0.687375	342	-156	-157	-1176	-1177	-1519	498	1019	342
chrX	69353692	IGBP1	ENST00000342206.6	0.789579	393	-105	-106	-1125	-1126	-1468	498	1019	342
chrX	71497076	RPS4X	ENST00000316084.6	0.714286	74	-30	-31	-822	-823	-1451	104	791	628
chrX	80457632	SH3BGRL	ENST00000373212.5	0.74031	190	-67	-68	-412	-413	-1732	257	344	1319
chrX	95940043	DIAPH2	ENST00000324765.8	0.959654	332	-14	-15	-3320	-3321	-9000	346	3305	5679
chrX	100306863	TRMT2B	ENST00000338687.7	0.301489	242	-563	-564	-1943	-1944	-3178	805	1379	1234
chrX	100355594	CENPI	ENST00000372926.1	0.610108	168	-108	-109	-1677	-1678	-2206	276	1568	528
chrX	100879928	ARMCX3	ENST00000341189.4	0.952656	824	-41	-42	-1181	-1182	-2905	865	1139	1723
chrX	101856972	ARMCX5	ENST00000246174.2	0.889898	783	-97	-98	-1774	-1775	-2115	880	1676	340
chrX	101857055	ARMCX5	ENST00000246174.2	0.984109	866	-14	-15	-1691	-1692	-2032	880	1676	340
chrX	101969583	GPRASP2	ENST00000332262.5	0.75	641	-214	-215	-2731	-2732	-3078	855	2516	346
chrX	101969609	GPRASP2	ENST00000332262.5	0.780374	667	-188	-189	-2705	-2706	-3052	855	2516	346
chrX	101969644	GPRASP2	ENST00000332262.5	0.821262	702	-153	-154	-2670	-2671	-3017	855	2516	346
chrX	102003798	BHLHB9	ENST00000361229.4	0.763258	402	-125	-126	-1769	-1770	-3571	527	1643	1801
chrX	102003857	BHLHB9	ENST00000361229.4	0.875	461	-66	-67	-1710	-1711	-3512	527	1643	1801
chrX	110925426	ALG13	ENST00000251943.4	0.602906	248	-164	-165	-3029	-3030	-3675	412	2864	645
chrX	110925436	ALG13	ENST00000251943.4	0.627119	258	-154	-155	-3019	-3020	-3665	412	2864	645
chrX	110925442	ALG13	ENST00000251943.4	0.641646	264	-148	-149	-3013	-3014	-3659	412	2864	645
chrX	110925448	ALG13	ENST00000251943.4	0.656174	270	-142	-143	-3007	-3008	-3653	412	2864	645
chrX	123095651	STAG2	ENST00000371144.3	0.225	62	-217	-218	-3913	-3914	-4218	279	3695	304
chrX	123156444	STAG2	ENST00000371144.3	0.882143	246	-33	-34	-3729	-3730	-4034	279	3695	304
chrX	128657351	SMARCA1	ENST00000371121.3	0.973451	109	-3	-4	-3132	-3133	-3938	112	3128	805
chrX	148626947	CXorf40A	ENST00000393985.3	0.786311	470	-128	-129	-605	-606	-677	598	476	71
chrX	148627016	CXorf40A	ENST00000393985.3	0.901503	539	-59	-60	-536	-537	-608	598	476	71
chrX	149102322	CXorf40B	ENST00000355203.2	0.47541	115	-128	-129	-605	-606	-951	243	476	345
chrX	150565721	VMA21	ENST00000330374.6	0.438095	45	-59	-60	-365	-366	-4671	104	305	4305
chrX	153637863	DNASE1L1	ENST00000369809.1	0.553968	348	-281	-282	-1190	-1191	-2659	629	908	1468
chrX	153637891	DNASE1L1	ENST00000369809.1	0.509524	320	-309	-310	-1218	-1219	-2687	629	908	1468
chrX	153637910	DNASE1L1	ENST00000369809.1	0.479365	301	-328	-329	-1237	-1238	-2706	629	908	1468
chrX	153637933	DNASE1L1	ENST00000369809.1	0.442857	278	-351	-352	-1260	-1261	-2729	629	908	1468
chrX	153640294	DNASE1L1	ENST00000369809.1	0.212698	133	-496	-497	-1405	-1406	-2874	629	908	1468
chrX	154293309	CMC4	ENST00000369479.1	0.757919	334	-107	-108	-314	-315	-529	441	206	214
chrX	154293325	CMC4	ENST00000369479.1	0.721719	318	-123	-124	-330	-331	-545	441	206	214
chrX	154299408	MTCP1	ENST00000369476.3	0.162069	93	-486	-487	-810	-811	-2180	579	323	1369

## Sheet: YTH-E_m6A_sites_CDS
chr	coord	gene_name	refseqID	rel_location	utr5_st	utr5_end	cds_st	cds_end	utr3_st	utr3_end	utr5_size	cds_size	utr3_size
chr1	949648	ISG15	ENST00000379389.4	1.57831	438	288	287	-210	-211	-272	150	497	61
chr1	949734	ISG15	ENST00000379389.4	1.751	524	374	373	-124	-125	-186	150	497	61
chr1	1153925	SDF4	ENST00000263741.7	1.78797	1117	825	824	-222	-223	-961	292	1046	738
chr1	1168279	B3GALT6	ENST00000379198.2	1.62727	650	621	620	-369	-370	-2142	29	989	1772
chr1	1168320	B3GALT6	ENST00000379198.2	1.66869	691	662	661	-328	-329	-2101	29	989	1772
chr1	1168336	B3GALT6	ENST00000379198.2	1.68485	707	678	677	-312	-313	-2085	29	989	1772
chr1	1168391	B3GALT6	ENST00000379198.2	1.7404	762	733	732	-257	-258	-2030	29	989	1772
chr1	1168584	B3GALT6	ENST00000379198.2	1.93535	955	926	925	-64	-65	-1837	29	989	1772
chr1	1168588	B3GALT6	ENST00000379198.2	1.93939	959	930	929	-60	-61	-1833	29	989	1772
chr1	1168594	B3GALT6	ENST00000379198.2	1.94545	965	936	935	-54	-55	-1827	29	989	1772
chr1	1190622	UBE2J2	ENST00000347370.2	1.9375	1058	585	584	-39	-40	-1328	473	623	1288
chr1	1192385	UBE2J2	ENST00000347370.2	1.39263	718	245	244	-379	-380	-1668	473	623	1288
chr1	1192439	UBE2J2	ENST00000347370.2	1.30609	664	191	190	-433	-434	-1722	473	623	1288
chr1	1244552	PUSL1	ENST00000379031.5	1.24342	298	222	221	-690	-691	-988	76	911	297
chr1	1246395	PUSL1	ENST00000379031.5	1.88377	882	806	805	-106	-107	-404	76	911	297
chr1	1246753	PUSL1	ENST00000379031.5	1.99342	982	906	905	-6	-7	-304	76	911	297
chr1	1254737	CPSF3L	ENST00000435064.1	1.2041	450	368	367	-1435	-1436	-1697	82	1802	261
chr1	1254827	CPSF3L	ENST00000435064.1	1.15419	360	278	277	-1525	-1526	-1787	82	1802	261
chr1	1254847	CPSF3L	ENST00000435064.1	1.14309	340	258	257	-1545	-1546	-1807	82	1802	261
chr1	1335604	RP4-758J18.2	ENST00000444362.1	1.75281	225	201	200	-66	-67	-1521	24	266	1454
chr1	1477449	SSU72	ENST00000291386.3	1.99487	893	582	581	-3	-4	-396	311	584	392
chr1	1479343	SSU72	ENST00000291386.3	1.66496	700	389	388	-196	-197	-589	311	584	392
chr1	1480349	SSU72	ENST00000291386.3	1.44103	569	258	257	-327	-328	-720	311	584	392
chr1	1480360	SSU72	ENST00000291386.3	1.42222	558	247	246	-338	-339	-731	311	584	392
chr1	1500161	SSU72	ENST00000291386.3	1.36923	527	216	215	-369	-370	-762	311	584	392
chr1	1500206	SSU72	ENST00000291386.3	1.29231	482	171	170	-414	-415	-807	311	584	392
chr1	1509866	SSU72	ENST00000291386.3	1.12308	383	72	71	-513	-514	-906	311	584	392
chr1	1670385	SLC35E2	ENST00000246421.4	1.54182	849	434	433	-367	-368	-580	415	800	212
chr1	1735931	GNB1	ENST00000378609.4	1.34897	688	357	356	-666	-667	-2439	331	1022	1772
chr1	1849355	TMEM52	ENST00000310991.3	1.94603	603	596	595	-34	-35	-325	7	629	290
chr1	1849504	TMEM52	ENST00000310991.3	1.70952	454	447	446	-183	-184	-474	7	629	290
chr1	2319739	MORN1	ENST00000378529.3	1.17664	359	186	185	-867	-868	-1138	173	1052	270
chr1	2333687	RER1	ENST00000378512.1	1.91667	592	517	516	-47	-48	-811	75	563	763
chr1	2450666	PANK4	ENST00000378466.3	1.40956	963	951	950	-1371	-1372	-1685	12	2321	313
chr1	2451302	PANK4	ENST00000378466.3	1.34065	803	791	790	-1531	-1532	-1845	12	2321	313
chr1	2452686	PANK4	ENST00000378466.3	1.11886	288	276	275	-2046	-2047	-2360	12	2321	313
chr1	2452699	PANK4	ENST00000378466.3	1.11326	275	263	262	-2059	-2060	-2373	12	2321	313
chr1	3712491	LRRC47	ENST00000378251.1	1.31393	577	550	549	-1202	-1203	-2070	27	1751	867
chr1	3806545	C1orf174	ENST00000361605.3	1.97131	809	711	710	-21	-22	-856	98	731	834
chr1	3807211	C1orf174	ENST00000361605.3	1.7377	638	540	539	-192	-193	-1027	98	731	834
chr1	6285232	ICMT	ENST00000343813.5	1.8924	791	763	762	-92	-93	-3979	28	854	3886
chr1	6285236	ICMT	ENST00000343813.5	1.88772	787	759	758	-96	-97	-3983	28	854	3886
chr1	6285279	ICMT	ENST00000343813.5	1.83743	744	716	715	-139	-140	-4026	28	854	3886
chr1	6399539	ACOT7	ENST00000361521.4	1.33423	1363	372	371	-741	-742	-1065	991	1112	323
chr1	6592656	NOL9	ENST00000377705.5	1.66477	1434	1402	1401	-707	-708	-5214	32	2108	4506
chr1	6610537	NOL9	ENST00000377705.5	1.25367	567	535	534	-1574	-1575	-6081	32	2108	4506
chr1	6659379	KLHL21	ENST00000377658.4	1.64381	1206	1155	1154	-639	-640	-3280	51	1793	2640
chr1	6692949	THAP3	ENST00000054650.4	1.73889	689	532	531	-188	-189	-676	157	719	487
chr1	6692951	THAP3	ENST00000054650.4	1.74167	691	534	533	-186	-187	-674	157	719	487
chr1	6692991	THAP3	ENST00000054650.4	1.79722	731	574	573	-146	-147	-634	157	719	487
chr1	6692993	THAP3	ENST00000054650.4	1.8	733	576	575	-144	-145	-632	157	719	487
chr1	6693001	THAP3	ENST00000054650.4	1.81111	741	584	583	-136	-137	-624	157	719	487
chr1	6693003	THAP3	ENST00000054650.4	1.81389	743	586	585	-134	-135	-622	157	719	487
chr1	6693114	THAP3	ENST00000054650.4	1.96806	854	697	696	-23	-24	-511	157	719	487
chr1	6694620	DNAJC11	ENST00000349363.6	1.96447	964	923	922	-34	-35	-392	41	956	357
chr1	6694663	DNAJC11	ENST00000349363.6	1.91954	921	880	879	-77	-78	-435	41	956	357
chr1	6694675	DNAJC11	ENST00000349363.6	1.907	909	868	867	-89	-90	-447	41	956	357
chr1	6694706	DNAJC11	ENST00000349363.6	1.87461	878	837	836	-120	-121	-478	41	956	357
chr1	6694707	DNAJC11	ENST00000349363.6	1.87356	877	836	835	-121	-122	-479	41	956	357
chr1	6694743	DNAJC11	ENST00000349363.6	1.83595	841	800	799	-157	-158	-515	41	956	357
chr1	6694751	DNAJC11	ENST00000349363.6	1.82759	833	792	791	-165	-166	-523	41	956	357
chr1	6694780	DNAJC11	ENST00000349363.6	1.79728	804	763	762	-194	-195	-552	41	956	357
chr1	6705954	DNAJC11	ENST00000349363.6	1.70533	716	675	674	-282	-283	-640	41	956	357
chr1	6712911	DNAJC11	ENST00000349363.6	1.5162	535	494	493	-463	-464	-821	41	956	357
chr1	6885196	CAMTA1	ENST00000303635.7	1.03186	366	160	159	-4862	-4863	-8077	206	5021	3214
chr1	6885238	CAMTA1	ENST00000303635.7	1.04022	408	202	201	-4820	-4821	-8035	206	5021	3214
chr1	6885261	CAMTA1	ENST00000303635.7	1.0448	431	225	224	-4797	-4798	-8012	206	5021	3214
chr1	8073331	ERRFI1	ENST00000377482.5	1.95608	1551	1328	1327	-61	-62	-1552	223	1388	1490
chr1	8073470	ERRFI1	ENST00000377482.5	1.85601	1412	1189	1188	-200	-201	-1691	223	1388	1490
chr1	8073474	ERRFI1	ENST00000377482.5	1.85313	1408	1185	1184	-204	-205	-1695	223	1388	1490
chr1	8073733	ERRFI1	ENST00000377482.5	1.66667	1149	926	925	-463	-464	-1954	223	1388	1490
chr1	8073834	ERRFI1	ENST00000377482.5	1.59395	1048	825	824	-564	-565	-2055	223	1388	1490
chr1	8073861	ERRFI1	ENST00000377482.5	1.57451	1021	798	797	-591	-592	-2082	223	1388	1490
chr1	8073930	ERRFI1	ENST00000377482.5	1.52484	952	729	728	-660	-661	-2151	223	1388	1490
chr1	8073950	ERRFI1	ENST00000377482.5	1.51044	932	709	708	-680	-681	-2171	223	1388	1490
chr1	8074093	ERRFI1	ENST00000377482.5	1.40749	789	566	565	-823	-824	-2314	223	1388	1490
chr1	8074171	ERRFI1	ENST00000377482.5	1.35133	711	488	487	-901	-902	-2392	223	1388	1490
chr1	8074285	ERRFI1	ENST00000377482.5	1.26926	597	374	373	-1015	-1016	-2506	223	1388	1490
chr1	9416043	SPSB1	ENST00000328089.6	1.11314	433	93	92	-729	-730	-2686	340	821	1956
chr1	9642414	SLC25A33	ENST00000302692.6	1.8499	1030	821	820	-145	-146	-2823	209	965	2677
chr1	9996602	LZIC	ENST00000377213.1	1.13264	301	76	75	-497	-498	-643	225	572	145
chr1	9996611	LZIC	ENST00000377213.1	1.11693	292	67	66	-506	-507	-652	225	572	145
chr1	9996658	LZIC	ENST00000377213.1	1.0349	245	20	19	-553	-554	-699	225	572	145
chr1	10042755	NMNAT1	ENST00000377205.1	1.99524	979	836	835	-4	-5	-2801	143	839	2796
chr1	10318663	KIF1B	ENST00000263934.6	1.05571	448	296	295	-5017	-5018	-6367	152	5312	1349
chr1	10473286	PGD	ENST00000270776.8	1.56612	859	822	821	-630	-631	-1025	37	1451	394
chr1	10479754	PGD	ENST00000270776.8	1.96419	1437	1400	1399	-52	-53	-447	37	1451	394
chr1	10521561	DFFA	ENST00000377038.3	1.98594	1049	982	981	-14	-15	-4982	67	995	4967
chr1	10521698	DFFA	ENST00000377038.3	1.84839	912	845	844	-151	-152	-5119	67	995	4967
chr1	10521715	DFFA	ENST00000377038.3	1.83133	895	828	827	-168	-169	-5136	67	995	4967
chr1	10523196	DFFA	ENST00000377038.3	1.70482	769	702	701	-294	-295	-5262	67	995	4967
chr1	10523226	DFFA	ENST00000377038.3	1.6747	739	672	671	-324	-325	-5292	67	995	4967
chr1	10529307	DFFA	ENST00000377038.3	1.2259	292	225	224	-771	-772	-5739	67	995	4967
chr1	11142800	EXOSC10	ENST00000304457.7	1.47425	1262	1225	1224	-1358	-1359	-1458	37	2582	99
chr1	11333900	UBIAD1	ENST00000376804.2	1.57778	315	312	311	-228	-229	-509	3	539	280
chr1	11333911	UBIAD1	ENST00000376804.2	1.59815	326	323	322	-217	-218	-498	3	539	280
chr1	11333924	UBIAD1	ENST00000376804.2	1.62222	339	336	335	-204	-205	-485	3	539	280
chr1	11334038	UBIAD1	ENST00000376804.2	1.83333	453	450	449	-90	-91	-371	3	539	280
chr1	11334057	UBIAD1	ENST00000376804.2	1.86852	472	469	468	-71	-72	-352	3	539	280
chr1	11334065	UBIAD1	ENST00000376804.2	1.88333	480	477	476	-63	-64	-344	3	539	280
chr1	11334080	UBIAD1	ENST00000376804.2	1.91111	495	492	491	-48	-49	-329	3	539	280
chr1	11334110	UBIAD1	ENST00000376804.2	1.96667	525	522	521	-18	-19	-299	3	539	280
chr1	11735148	MAD2L2	ENST00000235310.3	1.91981	1513	585	584	-51	-52	-346	928	635	294
chr1	11983098	KIAA2013	ENST00000376572.3	1.77795	1667	1482	1481	-423	-424	-1147	185	1904	723
chr1	11983101	KIAA2013	ENST00000376572.3	1.77638	1664	1479	1478	-426	-427	-1150	185	1904	723
chr1	11983416	KIAA2013	ENST00000376572.3	1.61102	1349	1164	1163	-741	-742	-1465	185	1904	723
chr1	12030842	PLOD1	ENST00000196061.4	1.85668	1897	1871	1870	-313	-314	-1042	26	2183	728
chr1	12034788	PLOD1	ENST00000196061.4	1.96474	2133	2107	2106	-77	-78	-806	26	2183	728
chr1	12034802	PLOD1	ENST00000196061.4	1.97115	2147	2121	2120	-63	-64	-792	26	2183	728
chr1	12034850	PLOD1	ENST00000196061.4	1.99313	2195	2169	2168	-15	-16	-744	26	2183	728
chr1	12628388	DHRS3	ENST00000376223.2	1.9791	1273	890	889	-19	-20	-449	383	908	429
chr1	12632783	DHRS3	ENST00000376223.2	1.87679	1180	797	796	-112	-113	-542	383	908	429
chr1	12638820	DHRS3	ENST00000376223.2	1.68647	1007	624	623	-285	-286	-715	383	908	429
chr1	12677234	DHRS3	ENST00000376223.2	1.13201	503	120	119	-789	-790	-1219	383	908	429
chr1	13933701	PDPN	ENST00000294489.6	1.45886	669	329	328	-388	-389	-2434	340	716	2045
chr1	15541627	TMEM51	ENST00000376008.2	1.05774	475	44	43	-718	-719	-1455	431	761	736
chr1	15546143	TMEM51	ENST00000376008.2	1.87402	1097	666	665	-96	-97	-833	431	761	736
chr1	15546149	TMEM51	ENST00000376008.2	1.88189	1103	672	671	-90	-91	-827	431	761	736
chr1	15546221	TMEM51	ENST00000376008.2	1.97638	1175	744	743	-18	-19	-755	431	761	736
chr1	15863152	DNAJC16	ENST00000375838.1	1.23322	580	417	416	-1371	-1372	-1776	163	1787	404
chr1	16202827	SPEN	ENST00000375759.3	1.04866	738	535	534	-10460	-10461	-11493	203	10994	1032
chr1	16242695	SPEN	ENST00000375759.3	1.11969	1519	1316	1315	-9679	-9680	-10712	203	10994	1032
chr1	16245526	SPEN	ENST00000375759.3	1.13652	1704	1501	1500	-9494	-9495	-10527	203	10994	1032
chr1	16245983	SPEN	ENST00000375759.3	1.14607	1809	1606	1605	-9389	-9390	-10422	203	10994	1032
chr1	16247406	SPEN	ENST00000375759.3	1.15252	1880	1677	1676	-9318	-9319	-10351	203	10994	1032
chr1	16254644	SPEN	ENST00000375759.3	1.17362	2112	1909	1908	-9086	-9087	-10119	203	10994	1032
chr1	16254739	SPEN	ENST00000375759.3	1.18226	2207	2004	2003	-8991	-8992	-10024	203	10994	1032
chr1	16254749	SPEN	ENST00000375759.3	1.18317	2217	2014	2013	-8981	-8982	-10014	203	10994	1032
chr1	16254826	SPEN	ENST00000375759.3	1.19018	2294	2091	2090	-8904	-8905	-9937	203	10994	1032
chr1	16254839	SPEN	ENST00000375759.3	1.19136	2307	2104	2103	-8891	-8892	-9924	203	10994	1032
chr1	16255038	SPEN	ENST00000375759.3	1.20946	2506	2303	2302	-8692	-8693	-9725	203	10994	1032
chr1	16255069	SPEN	ENST00000375759.3	1.21228	2537	2334	2333	-8661	-8662	-9694	203	10994	1032
chr1	16256480	SPEN	ENST00000375759.3	1.34061	3948	3745	3744	-7250	-7251	-8283	203	10994	1032
chr1	16256579	SPEN	ENST00000375759.3	1.34961	4047	3844	3843	-7151	-7152	-8184	203	10994	1032
chr1	16256583	SPEN	ENST00000375759.3	1.34998	4051	3848	3847	-7147	-7148	-8180	203	10994	1032
chr1	16256632	SPEN	ENST00000375759.3	1.35443	4100	3897	3896	-7098	-7099	-8131	203	10994	1032
chr1	16256721	SPEN	ENST00000375759.3	1.36253	4189	3986	3985	-7009	-7010	-8042	203	10994	1032
chr1	16256846	SPEN	ENST00000375759.3	1.3739	4314	4111	4110	-6884	-6885	-7917	203	10994	1032
chr1	16256884	SPEN	ENST00000375759.3	1.37735	4352	4149	4148	-6846	-6847	-7879	203	10994	1032
chr1	16256965	SPEN	ENST00000375759.3	1.38472	4433	4230	4229	-6765	-6766	-7798	203	10994	1032
chr1	16256974	SPEN	ENST00000375759.3	1.38554	4442	4239	4238	-6756	-6757	-7789	203	10994	1032
chr1	16256981	SPEN	ENST00000375759.3	1.38618	4449	4246	4245	-6749	-6750	-7782	203	10994	1032
chr1	16264103	SPEN	ENST00000375759.3	1.95243	10675	10472	10471	-523	-524	-1556	203	10994	1032
chr1	16475297	EPHA2	ENST00000358432.5	1.13613	553	399	398	-2532	-2533	-3410	154	2930	877
chr1	16475330	EPHA2	ENST00000358432.5	1.12487	520	366	365	-2565	-2566	-3443	154	2930	877
chr1	16475389	EPHA2	ENST00000358432.5	1.10474	461	307	306	-2624	-2625	-3502	154	2930	877
chr1	16577339	FBXO42	ENST00000375592.3	1.91922	2196	1980	1979	-174	-175	-4005	216	2153	3830
chr1	16577360	FBXO42	ENST00000375592.3	1.90947	2175	1959	1958	-195	-196	-4026	216	2153	3830
chr1	16577440	FBXO42	ENST00000375592.3	1.87233	2095	1879	1878	-275	-276	-4106	216	2153	3830
chr1	16577481	FBXO42	ENST00000375592.3	1.8533	2054	1838	1837	-316	-317	-4147	216	2153	3830
chr1	16577718	FBXO42	ENST00000375592.3	1.74327	1817	1601	1600	-553	-554	-4384	216	2153	3830
chr1	16577722	FBXO42	ENST00000375592.3	1.74141	1813	1597	1596	-557	-558	-4388	216	2153	3830
chr1	16577797	FBXO42	ENST00000375592.3	1.70659	1738	1522	1521	-632	-633	-4463	216	2153	3830
chr1	16577897	FBXO42	ENST00000375592.3	1.66017	1638	1422	1421	-732	-733	-4563	216	2153	3830
chr1	16578090	FBXO42	ENST00000375592.3	1.57057	1445	1229	1228	-925	-926	-4756	216	2153	3830
chr1	16578104	FBXO42	ENST00000375592.3	1.56407	1431	1215	1214	-939	-940	-4770	216	2153	3830
chr1	16578199	FBXO42	ENST00000375592.3	1.51996	1336	1120	1119	-1034	-1035	-4865	216	2153	3830
chr1	16583118	FBXO42	ENST00000375592.3	1.29666	855	639	638	-1515	-1516	-5346	216	2153	3830
chr1	16641710	FBXO42	ENST00000375592.3	1.09471	420	204	203	-1950	-1951	-5781	216	2153	3830
chr1	16641728	FBXO42	ENST00000375592.3	1.08635	402	186	185	-1968	-1969	-5799	216	2153	3830
chr1	16641787	FBXO42	ENST00000375592.3	1.05896	343	127	126	-2027	-2028	-5858	216	2153	3830
chr1	16721704	SZRD1	ENST00000375590.3	1.87631	439	418	417	-59	-60	-903	21	476	843
chr1	16721743	SZRD1	ENST00000375590.3	1.95807	478	457	456	-20	-21	-864	21	476	843
chr1	16721748	SZRD1	ENST00000375590.3	1.96855	483	462	461	-15	-16	-859	21	476	843
chr1	16721752	SZRD1	ENST00000375590.3	1.97694	487	466	465	-11	-12	-855	21	476	843
chr1	16767292	NECAP2	ENST00000337132.5	1.04545	125	36	35	-756	-757	-1944	89	791	1187
chr1	16890496	NBPF1	ENST00000430580.2	1.98304	4249	3362	3361	-58	-59	-1682	887	3419	1623
chr1	16890516	NBPF1	ENST00000430580.2	1.97719	4229	3342	3341	-78	-79	-1702	887	3419	1623
chr1	16893732	NBPF1	ENST00000430580.2	1.81316	3668	2781	2780	-639	-640	-2263	887	3419	1623
chr1	17355189	SDHB	ENST00000375499.3	1.39027	479	329	328	-514	-515	-673	150	842	158
chr1	19449373	UBR4	ENST00000375217.2	1.62771	9752	9749	9748	-5782	-5783	-6108	3	15530	325
chr1	19545843	EMC1	ENST00000375208.3	1.98422	2882	2870	2869	-46	-47	-1201	12	2915	1154
chr1	19585222	MRTO4	ENST00000330263.4	1.85833	914	618	617	-102	-103	-1400	296	719	1297
chr1	19585321	MRTO4	ENST00000330263.4	1.99583	1013	717	716	-3	-4	-1301	296	719	1297
chr1	20827189	MUL1	ENST00000264198.3	1.99433	1189	1053	1052	-6	-7	-1246	136	1058	1239
chr1	20827192	MUL1	ENST00000264198.3	1.9915	1186	1050	1049	-9	-10	-1249	136	1058	1239
chr1	20827315	MUL1	ENST00000264198.3	1.87535	1063	927	926	-132	-133	-1372	136	1058	1239
chr1	20827561	MUL1	ENST00000264198.3	1.64306	817	681	680	-378	-379	-1618	136	1058	1239
chr1	20827624	MUL1	ENST00000264198.3	1.58357	754	618	617	-441	-442	-1681	136	1058	1239
chr1	20827627	MUL1	ENST00000264198.3	1.58074	751	615	614	-444	-445	-1684	136	1058	1239
chr1	20827688	MUL1	ENST00000264198.3	1.52314	690	554	553	-505	-506	-1745	136	1058	1239
chr1	20979126	DDOST	ENST00000375048.3	1.88184	1314	1209	1208	-162	-163	-764	105	1370	601
chr1	20979186	DDOST	ENST00000375048.3	1.83807	1254	1149	1148	-222	-223	-824	105	1370	601
chr1	20987706	DDOST	ENST00000375048.3	1.13786	294	189	188	-1182	-1183	-1784	105	1370	601
chr1	21071305	HP1BP3	ENST00000312239.5	1.99097	1786	1647	1646	-15	-16	-2151	139	1661	2135
chr1	21076272	HP1BP3	ENST00000312239.5	1.65283	1224	1085	1084	-577	-578	-2713	139	1661	2135
chr1	21268565	EIF4G3	ENST00000264211.8	1.1921	1108	914	913	-3844	-3845	-4693	194	4757	848
chr1	22050479	USP48	ENST00000308271.9	1.50193	2208	1560	1559	-1548	-1549	-2386	648	3107	837
chr1	22055075	USP48	ENST00000308271.9	1.46268	2086	1438	1437	-1670	-1671	-2508	648	3107	837
chr1	22055108	USP48	ENST00000308271.9	1.45206	2053	1405	1404	-1703	-1704	-2541	648	3107	837
chr1	22056239	USP48	ENST00000308271.9	1.40476	1906	1258	1257	-1850	-1851	-2688	648	3107	837
chr1	22083073	USP48	ENST00000308271.9	1.12162	1026	378	377	-2730	-2731	-3568	648	3107	837
chr1	22413247	CDC42	ENST00000315554.8	1.64931	477	374	373	-202	-203	-974	103	575	771
chr1	22413269	CDC42	ENST00000315554.8	1.6875	499	396	395	-180	-181	-952	103	575	771
chr1	22413273	CDC42	ENST00000315554.8	1.69444	503	400	399	-176	-177	-948	103	575	771
chr1	23405544	KDM1A	ENST00000356634.3	1.72567	2005	1857	1856	-702	-703	-1027	148	2558	324
chr1	23408000	KDM1A	ENST00000356634.3	1.84408	2308	2160	2159	-399	-400	-724	148	2558	324
chr1	23636969	HNRNPR	ENST00000302271.6	1.98843	1940	1880	1879	-22	-23	-688	60	1901	665
chr1	23636989	HNRNPR	ENST00000302271.6	1.97792	1920	1860	1859	-42	-43	-708	60	1901	665
chr1	23637036	HNRNPR	ENST00000302271.6	1.95321	1873	1813	1812	-89	-90	-755	60	1901	665
chr1	23637402	HNRNPR	ENST00000302271.6	1.76078	1507	1447	1446	-455	-456	-1121	60	1901	665
chr1	23637406	HNRNPR	ENST00000302271.6	1.75868	1503	1443	1442	-459	-460	-1125	60	1901	665
chr1	23637409	HNRNPR	ENST00000302271.6	1.7571	1500	1440	1439	-462	-463	-1128	60	1901	665
chr1	23637457	HNRNPR	ENST00000302271.6	1.73186	1452	1392	1391	-510	-511	-1176	60	1901	665
chr1	23637469	HNRNPR	ENST00000302271.6	1.72555	1440	1380	1379	-522	-523	-1188	60	1901	665
chr1	23637697	HNRNPR	ENST00000302271.6	1.67613	1346	1286	1285	-616	-617	-1282	60	1901	665
chr1	23640128	HNRNPR	ENST00000302271.6	1.57045	1145	1085	1084	-817	-818	-1483	60	1901	665
chr1	23645028	HNRNPR	ENST00000302271.6	1.50736	1025	965	964	-937	-938	-1603	60	1901	665
chr1	23660084	HNRNPR	ENST00000302271.6	1.22345	485	425	424	-1477	-1478	-2143	60	1901	665
chr1	23667424	HNRNPR	ENST00000302271.6	1.04101	138	78	77	-1824	-1825	-2490	60	1901	665
chr1	24019185	RPL11	ENST00000374550.3	1.17318	137	93	92	-444	-445	-496	44	536	51
chr1	24019232	RPL11	ENST00000374550.3	1.26071	184	140	139	-397	-398	-449	44	536	51
chr1	24020306	RPL11	ENST00000374550.3	1.31099	211	167	166	-370	-371	-422	44	536	51
chr1	24020362	RPL11	ENST00000374550.3	1.41527	267	223	222	-314	-315	-366	44	536	51
chr1	24022354	RPL11	ENST00000374550.3	1.8622	507	463	462	-74	-75	-126	44	536	51
chr1	24077646	TCEB3	ENST00000418390.2	1.26241	899	629	628	-1768	-1769	-4254	270	2396	2485
chr1	24077665	TCEB3	ENST00000418390.2	1.27034	918	648	647	-1749	-1750	-4235	270	2396	2485
chr1	24077671	TCEB3	ENST00000418390.2	1.27284	924	654	653	-1743	-1744	-4229	270	2396	2485
chr1	24077737	TCEB3	ENST00000418390.2	1.30038	990	720	719	-1677	-1678	-4163	270	2396	2485
chr1	24077777	TCEB3	ENST00000418390.2	1.31706	1030	760	759	-1637	-1638	-4123	270	2396	2485
chr1	24077821	TCEB3	ENST00000418390.2	1.33542	1074	804	803	-1593	-1594	-4079	270	2396	2485
chr1	24078045	TCEB3	ENST00000418390.2	1.42887	1298	1028	1027	-1369	-1370	-3855	270	2396	2485
chr1	24078112	TCEB3	ENST00000418390.2	1.45682	1365	1095	1094	-1302	-1303	-3788	270	2396	2485
chr1	24078192	TCEB3	ENST00000418390.2	1.4902	1445	1175	1174	-1222	-1223	-3708	270	2396	2485
chr1	24078228	TCEB3	ENST00000418390.2	1.50521	1481	1211	1210	-1186	-1187	-3672	270	2396	2485
chr1	24078248	TCEB3	ENST00000418390.2	1.51356	1501	1231	1230	-1166	-1167	-3652	270	2396	2485
chr1	24078295	TCEB3	ENST00000418390.2	1.53317	1548	1278	1277	-1119	-1120	-3605	270	2396	2485
chr1	24078381	TCEB3	ENST00000418390.2	1.56904	1634	1364	1363	-1033	-1034	-3519	270	2396	2485
chr1	24078386	TCEB3	ENST00000418390.2	1.57113	1639	1369	1368	-1028	-1029	-3514	270	2396	2485
chr1	24078458	TCEB3	ENST00000418390.2	1.60117	1711	1441	1440	-956	-957	-3442	270	2396	2485
chr1	24078469	TCEB3	ENST00000418390.2	1.60576	1722	1452	1451	-945	-946	-3431	270	2396	2485
chr1	24082377	TCEB3	ENST00000418390.2	1.7985	2184	1914	1913	-483	-484	-2969	270	2396	2485
chr1	24082383	TCEB3	ENST00000418390.2	1.801	2190	1920	1919	-477	-478	-2963	270	2396	2485
chr1	24082471	TCEB3	ENST00000418390.2	1.83771	2278	2008	2007	-389	-390	-2875	270	2396	2485
chr1	24130958	HMGCL	ENST00000374483.4	1.81174	1404	733	732	-170	-171	-746	671	902	575
chr1	24172218	FUCA1	ENST00000374479.3	1.99072	1395	1388	1387	-13	-14	-651	7	1400	637
chr1	24172250	FUCA1	ENST00000374479.3	1.96788	1363	1356	1355	-45	-46	-683	7	1400	637
chr1	24172276	FUCA1	ENST00000374479.3	1.94932	1337	1330	1329	-71	-72	-709	7	1400	637
chr1	24172621	FUCA1	ENST00000374479.3	1.85867	1210	1203	1202	-198	-199	-836	7	1400	637
chr1	24175263	FUCA1	ENST00000374479.3	1.73947	1043	1036	1035	-365	-366	-1003	7	1400	637
chr1	24180892	FUCA1	ENST00000374479.3	1.66167	934	927	926	-474	-475	-1112	7	1400	637
chr1	24180963	FUCA1	ENST00000374479.3	1.61099	863	856	855	-545	-546	-1183	7	1400	637
chr1	24181015	FUCA1	ENST00000374479.3	1.57388	811	804	803	-597	-598	-1235	7	1400	637
chr1	24189635	FUCA1	ENST00000374479.3	1.46467	658	651	650	-750	-751	-1388	7	1400	637
chr1	24189683	FUCA1	ENST00000374479.3	1.43041	610	603	602	-798	-799	-1436	7	1400	637
chr1	24189703	FUCA1	ENST00000374479.3	1.41613	590	583	582	-818	-819	-1456	7	1400	637
chr1	24191996	FUCA1	ENST00000374479.3	1.36331	516	509	508	-892	-893	-1530	7	1400	637
chr1	24192024	FUCA1	ENST00000374479.3	1.34333	488	481	480	-920	-921	-1558	7	1400	637
chr1	24288338	PNRC2	ENST00000334351.7	1.93095	801	391	390	-29	-30	-1614	410	419	1584
chr1	24700242	STPG1	ENST00000003583.8	1.43981	521	380	379	-484	-485	-2022	141	863	1537
chr1	24700260	STPG1	ENST00000003583.8	1.41898	503	362	361	-502	-503	-2040	141	863	1537
chr1	24700268	STPG1	ENST00000003583.8	1.40972	495	354	353	-510	-511	-2048	141	863	1537
chr1	24706261	STPG1	ENST00000003583.8	1.23495	344	203	202	-661	-662	-2199	141	863	1537
chr1	24977931	SRRM1	ENST00000323848.9	1.20368	867	553	552	-2162	-2163	-3143	314	2714	980
chr1	24981552	SRRM1	ENST00000323848.9	1.4593	1561	1247	1246	-1468	-1469	-2449	314	2714	980
chr1	25166456	CLIC4	ENST00000374379.4	1.68373	717	521	520	-241	-242	-3628	196	761	3386
chr1	25167421	CLIC4	ENST00000374379.4	1.99081	951	755	754	-7	-8	-3394	196	761	3386
chr1	25553946	SYF2	ENST00000236273.4	1.62022	479	454	453	-278	-279	-865	25	731	586
chr1	25667022	TMEM50A	ENST00000374358.4	1.09494	597	45	44	-429	-430	-2085	552	473	1655
chr1	25669514	TMEM50A	ENST00000374358.4	1.32911	708	156	155	-318	-319	-1974	552	473	1655
chr1	25669520	TMEM50A	ENST00000374358.4	1.34177	714	162	161	-312	-313	-1968	552	473	1655
chr1	26156062	MTFR1L	ENST00000374300.3	1.58476	775	514	513	-365	-366	-1277	261	878	911
chr1	26158449	MTFR1L	ENST00000374300.3	1.92264	1072	811	810	-68	-69	-980	261	878	911
chr1	26161655	AUNIP	ENST00000374298.3	1.84078	957	903	902	-171	-172	-1158	54	1073	986
chr1	26161784	AUNIP	ENST00000374298.3	1.72067	828	774	773	-300	-301	-1287	54	1073	986
chr1	26161892	AUNIP	ENST00000374298.3	1.62011	720	666	665	-408	-409	-1395	54	1073	986
chr1	26162031	AUNIP	ENST00000374298.3	1.49069	581	527	526	-547	-548	-1534	54	1073	986
chr1	26162079	AUNIP	ENST00000374298.3	1.446	533	479	478	-595	-596	-1582	54	1073	986
chr1	26162106	AUNIP	ENST00000374298.3	1.42086	506	452	451	-622	-623	-1609	54	1073	986
chr1	26227510	STMN1	ENST00000399728.1	1.99333	810	447	446	-3	-4	-901	363	449	897
chr1	26227520	STMN1	ENST00000399728.1	1.97111	800	437	436	-13	-14	-911	363	449	897
chr1	26227525	STMN1	ENST00000399728.1	1.96	795	432	431	-18	-19	-916	363	449	897
chr1	26440917	PDIK1L	ENST00000374269.1	1.11501	201	118	117	-908	-909	-2364	83	1025	1455
chr1	26440944	PDIK1L	ENST00000374269.1	1.14133	228	145	144	-881	-882	-2337	83	1025	1455
chr1	26440961	PDIK1L	ENST00000374269.1	1.15789	245	162	161	-864	-865	-2320	83	1025	1455
chr1	26441025	PDIK1L	ENST00000374269.1	1.22027	309	226	225	-800	-801	-2256	83	1025	1455
chr1	26448411	PDIK1L	ENST00000374269.1	1.35965	452	369	368	-657	-658	-2113	83	1025	1455
chr1	26448744	PDIK1L	ENST00000374269.1	1.68421	785	702	701	-324	-325	-1780	83	1025	1455
chr1	26448856	PDIK1L	ENST00000374269.1	1.79337	897	814	813	-212	-213	-1668	83	1025	1455
chr1	26581779	CEP85	ENST00000252992.4	1.14242	456	326	325	-1963	-1964	-3478	130	2288	1514
chr1	26612329	UBXN11	ENST00000314675.7	1.33167	478	399	398	-804	-805	-1775	79	1202	970
chr1	27106037	ARID1A	ENST00000324856.7	1.82356	6018	5648	5647	-1210	-1211	-2558	370	6857	1347
chr1	27106112	ARID1A	ENST00000324856.7	1.8345	6093	5723	5722	-1135	-1136	-2483	370	6857	1347
chr1	27106446	ARID1A	ENST00000324856.7	1.8832	6427	6057	6056	-801	-802	-2149	370	6857	1347
chr1	27106459	ARID1A	ENST00000324856.7	1.8851	6440	6070	6069	-788	-789	-2136	370	6857	1347
chr1	27106579	ARID1A	ENST00000324856.7	1.9026	6560	6190	6189	-668	-669	-2016	370	6857	1347
chr1	27106657	ARID1A	ENST00000324856.7	1.91397	6638	6268	6267	-590	-591	-1938	370	6857	1347
chr1	27106755	ARID1A	ENST00000324856.7	1.92826	6736	6366	6365	-492	-493	-1840	370	6857	1347
chr1	27106762	ARID1A	ENST00000324856.7	1.92928	6743	6373	6372	-485	-486	-1833	370	6857	1347
chr1	27106908	ARID1A	ENST00000324856.7	1.95057	6889	6519	6518	-339	-340	-1687	370	6857	1347
chr1	27106946	ARID1A	ENST00000324856.7	1.95611	6927	6557	6556	-301	-302	-1649	370	6857	1347
chr1	27106965	ARID1A	ENST00000324856.7	1.95888	6946	6576	6575	-282	-283	-1630	370	6857	1347
chr1	27107066	ARID1A	ENST00000324856.7	1.97361	7047	6677	6676	-181	-182	-1529	370	6857	1347
chr1	27107124	ARID1A	ENST00000324856.7	1.98206	7105	6735	6734	-123	-124	-1471	370	6857	1347
chr1	27107130	ARID1A	ENST00000324856.7	1.98294	7111	6741	6740	-117	-118	-1465	370	6857	1347
chr1	27107144	ARID1A	ENST00000324856.7	1.98498	7125	6755	6754	-103	-104	-1451	370	6857	1347
chr1	27107151	ARID1A	ENST00000324856.7	1.986	7132	6762	6761	-96	-97	-1444	370	6857	1347
chr1	27107169	ARID1A	ENST00000324856.7	1.98863	7150	6780	6779	-78	-79	-1426	370	6857	1347
chr1	27107174	ARID1A	ENST00000324856.7	1.98936	7155	6785	6784	-73	-74	-1421	370	6857	1347
chr1	27107211	ARID1A	ENST00000324856.7	1.99475	7192	6822	6821	-36	-37	-1384	370	6857	1347
chr1	27107224	ARID1A	ENST00000324856.7	1.99665	7205	6835	6834	-23	-24	-1371	370	6857	1347
chr1	27120897	PIGV	ENST00000078527.4	1.25101	702	372	371	-1110	-1111	-1664	330	1481	553
chr1	27121014	PIGV	ENST00000078527.4	1.32996	819	489	488	-993	-994	-1547	330	1481	553
chr1	27121482	PIGV	ENST00000078527.4	1.64575	1287	957	956	-525	-526	-1079	330	1481	553
chr1	27121513	PIGV	ENST00000078527.4	1.66667	1318	988	987	-494	-495	-1048	330	1481	553
chr1	27121560	PIGV	ENST00000078527.4	1.69838	1365	1035	1034	-447	-448	-1001	330	1481	553
chr1	27121591	PIGV	ENST00000078527.4	1.7193	1396	1066	1065	-416	-417	-970	330	1481	553
chr1	27121622	PIGV	ENST00000078527.4	1.74022	1427	1097	1096	-385	-386	-939	330	1481	553
chr1	27124258	PIGV	ENST00000078527.4	1.94804	1735	1405	1404	-77	-78	-631	330	1481	553
chr1	27124275	PIGV	ENST00000078527.4	1.95951	1752	1422	1421	-60	-61	-614	330	1481	553
chr1	27124283	PIGV	ENST00000078527.4	1.96491	1760	1430	1429	-52	-53	-606	330	1481	553
chr1	27124309	PIGV	ENST00000078527.4	1.98246	1786	1456	1455	-26	-27	-580	330	1481	553
chr1	27217558	GPATCH3	ENST00000361720.5	1.96388	1544	1521	1520	-57	-58	-578	23	1577	520
chr1	27223972	GPATCH3	ENST00000361720.5	1.44106	719	696	695	-882	-883	-1403	23	1577	520
chr1	27223991	GPATCH3	ENST00000361720.5	1.42902	700	677	676	-901	-902	-1422	23	1577	520
chr1	28148801	STX12	ENST00000373943.4	1.95307	916	792	791	-39	-40	-2162	124	830	2122
chr1	28233484	RPA2	ENST00000373912.3	1.35424	587	288	287	-525	-526	-1164	299	812	638
chr1	28282519	SMPDL3B	ENST00000373888.4	1.82977	1075	931	930	-191	-192	-472	144	1121	280
chr1	28293188	XKR8	ENST00000373884.5	1.55976	1272	665	664	-523	-524	-1419	607	1187	895
chr1	28293219	XKR8	ENST00000373884.5	1.58586	1303	696	695	-492	-493	-1388	607	1187	895
chr1	28293348	XKR8	ENST00000373884.5	1.69444	1432	825	824	-363	-364	-1259	607	1187	895
chr1	28293549	XKR8	ENST00000373884.5	1.86364	1633	1026	1025	-162	-163	-1058	607	1187	895
chr1	28337519	EYA3	ENST00000373871.3	1.49245	1088	848	847	-874	-875	-4996	240	1721	4121
chr1	28661166	MED18	ENST00000373842.4	1.49761	520	312	311	-315	-316	-1310	208	626	994
chr1	28661301	MED18	ENST00000373842.4	1.71292	655	447	446	-180	-181	-1175	208	626	994
chr1	28661347	MED18	ENST00000373842.4	1.78628	701	493	492	-134	-135	-1129	208	626	994
chr1	28661409	MED18	ENST00000373842.4	1.88517	763	555	554	-72	-73	-1067	208	626	994
chr1	28661428	MED18	ENST00000373842.4	1.91547	782	574	573	-53	-54	-1048	208	626	994
chr1	28661475	MED18	ENST00000373842.4	1.99043	829	621	620	-6	-7	-1001	208	626	994
chr1	28793125	PHACTR4	ENST00000373836.3	1.32679	912	699	698	-1440	-1441	-5199	213	2138	3758
chr1	28793205	PHACTR4	ENST00000373836.3	1.36419	992	779	778	-1360	-1361	-5119	213	2138	3758
chr1	28793253	PHACTR4	ENST00000373836.3	1.38663	1040	827	826	-1312	-1313	-5071	213	2138	3758
chr1	28800228	PHACTR4	ENST00000373836.3	1.47499	1229	1016	1015	-1123	-1124	-4882	213	2138	3758
chr1	28800248	PHACTR4	ENST00000373836.3	1.48434	1249	1036	1035	-1103	-1104	-4862	213	2138	3758
chr1	28800341	PHACTR4	ENST00000373836.3	1.52782	1342	1129	1128	-1010	-1011	-4769	213	2138	3758
chr1	28800437	PHACTR4	ENST00000373836.3	1.5727	1438	1225	1224	-914	-915	-4673	213	2138	3758
chr1	28800482	PHACTR4	ENST00000373836.3	1.59374	1483	1270	1269	-869	-870	-4628	213	2138	3758
chr1	28800519	PHACTR4	ENST00000373836.3	1.61103	1520	1307	1306	-832	-833	-4591	213	2138	3758
chr1	28800559	PHACTR4	ENST00000373836.3	1.62973	1560	1347	1346	-792	-793	-4551	213	2138	3758
chr1	28800592	PHACTR4	ENST00000373836.3	1.64516	1593	1380	1379	-759	-760	-4518	213	2138	3758
chr1	28807088	PHACTR4	ENST00000373836.3	1.82375	1975	1762	1761	-377	-378	-4136	213	2138	3758
chr1	28891334	TRNAU1AP	ENST00000373830.3	1.46065	423	398	397	-466	-467	-1369	25	863	902
chr1	29030795	GMEB1	ENST00000294409.2	1.49477	941	852	851	-870	-871	-970	89	1721	99
chr1	29069022	YTHDF2	ENST00000373812.3	1.13793	601	240	239	-1500	-1501	-2323	361	1739	822
chr1	29069210	YTHDF2	ENST00000373812.3	1.24598	789	428	427	-1312	-1313	-2135	361	1739	822
chr1	29069333	YTHDF2	ENST00000373812.3	1.31667	912	551	550	-1189	-1190	-2012	361	1739	822
chr1	29069598	YTHDF2	ENST00000373812.3	1.46897	1177	816	815	-924	-925	-1747	361	1739	822
chr1	29069707	YTHDF2	ENST00000373812.3	1.53161	1286	925	924	-815	-816	-1638	361	1739	822
chr1	29069924	YTHDF2	ENST00000373812.3	1.65632	1503	1142	1141	-598	-599	-1421	361	1739	822
chr1	29069973	YTHDF2	ENST00000373812.3	1.68448	1552	1191	1190	-549	-550	-1372	361	1739	822
chr1	29069994	YTHDF2	ENST00000373812.3	1.69655	1573	1212	1211	-528	-529	-1351	361	1739	822
chr1	29070001	YTHDF2	ENST00000373812.3	1.70057	1580	1219	1218	-521	-522	-1344	361	1739	822
chr1	29070007	YTHDF2	ENST00000373812.3	1.70402	1586	1225	1224	-515	-516	-1338	361	1739	822
chr1	29070021	YTHDF2	ENST00000373812.3	1.71207	1600	1239	1238	-501	-502	-1324	361	1739	822
chr1	29070024	YTHDF2	ENST00000373812.3	1.71379	1603	1242	1241	-498	-499	-1321	361	1739	822
chr1	29070036	YTHDF2	ENST00000373812.3	1.72069	1615	1254	1253	-486	-487	-1309	361	1739	822
chr1	29070052	YTHDF2	ENST00000373812.3	1.72989	1631	1270	1269	-470	-471	-1293	361	1739	822
chr1	29070059	YTHDF2	ENST00000373812.3	1.73391	1638	1277	1276	-463	-464	-1286	361	1739	822
chr1	29070091	YTHDF2	ENST00000373812.3	1.7523	1670	1309	1308	-431	-432	-1254	361	1739	822
chr1	29070121	YTHDF2	ENST00000373812.3	1.76954	1700	1339	1338	-401	-402	-1224	361	1739	822
chr1	29070126	YTHDF2	ENST00000373812.3	1.77241	1705	1344	1343	-396	-397	-1219	361	1739	822
chr1	29070132	YTHDF2	ENST00000373812.3	1.77586	1711	1350	1349	-390	-391	-1213	361	1739	822
chr1	29070150	YTHDF2	ENST00000373812.3	1.78621	1729	1368	1367	-372	-373	-1195	361	1739	822
chr1	29070154	YTHDF2	ENST00000373812.3	1.78851	1733	1372	1371	-368	-369	-1191	361	1739	822
chr1	29070159	YTHDF2	ENST00000373812.3	1.79138	1738	1377	1376	-363	-364	-1186	361	1739	822
chr1	29070165	YTHDF2	ENST00000373812.3	1.79483	1744	1383	1382	-357	-358	-1180	361	1739	822
chr1	29070168	YTHDF2	ENST00000373812.3	1.79655	1747	1386	1385	-354	-355	-1177	361	1739	822
chr1	29070183	YTHDF2	ENST00000373812.3	1.80517	1762	1401	1400	-339	-340	-1162	361	1739	822
chr1	29070222	YTHDF2	ENST00000373812.3	1.82759	1801	1440	1439	-300	-301	-1123	361	1739	822
chr1	29070230	YTHDF2	ENST00000373812.3	1.83218	1809	1448	1447	-292	-293	-1115	361	1739	822
chr1	29070262	YTHDF2	ENST00000373812.3	1.85057	1841	1480	1479	-260	-261	-1083	361	1739	822
chr1	29070298	YTHDF2	ENST00000373812.3	1.87126	1877	1516	1515	-224	-225	-1047	361	1739	822
chr1	29070310	YTHDF2	ENST00000373812.3	1.87816	1889	1528	1527	-212	-213	-1035	361	1739	822
chr1	29070318	YTHDF2	ENST00000373812.3	1.88276	1897	1536	1535	-204	-205	-1027	361	1739	822
chr1	29070333	YTHDF2	ENST00000373812.3	1.89138	1912	1551	1550	-189	-190	-1012	361	1739	822
chr1	29070346	YTHDF2	ENST00000373812.3	1.89885	1925	1564	1563	-176	-177	-999	361	1739	822
chr1	29070353	YTHDF2	ENST00000373812.3	1.90287	1932	1571	1570	-169	-170	-992	361	1739	822
chr1	29070357	YTHDF2	ENST00000373812.3	1.90517	1936	1575	1574	-165	-166	-988	361	1739	822
chr1	29070429	YTHDF2	ENST00000373812.3	1.94655	2008	1647	1646	-93	-94	-916	361	1739	822
chr1	29070434	YTHDF2	ENST00000373812.3	1.94943	2013	1652	1651	-88	-89	-911	361	1739	822
chr1	29070459	YTHDF2	ENST00000373812.3	1.96379	2038	1677	1676	-63	-64	-886	361	1739	822
chr1	29314375	EPB41	ENST00000343067.4	1.16416	552	426	425	-2169	-2170	-5377	126	2594	3207
chr1	29344847	EPB41	ENST00000343067.4	1.39191	1143	1017	1016	-1578	-1579	-4786	126	2594	3207
chr1	29359661	EPB41	ENST00000343067.4	1.48902	1395	1269	1268	-1326	-1327	-4534	126	2594	3207
chr1	29359739	EPB41	ENST00000343067.4	1.51908	1473	1347	1346	-1248	-1249	-4456	126	2594	3207
chr1	29474934	SRSF4	ENST00000373795.4	1.99192	1707	1473	1472	-12	-13	-679	234	1484	666
chr1	29481231	SRSF4	ENST00000373795.4	1.37374	789	555	554	-930	-931	-1597	234	1484	666
chr1	29520545	MECR	ENST00000373791.3	1.9877	1255	883	882	-11	-12	-1160	372	893	1148
chr1	31406064	PUM1	ENST00000257075.5	1.99832	3648	3555	3554	-6	-7	-1711	93	3560	1704
chr1	31406085	PUM1	ENST00000257075.5	1.99242	3627	3534	3533	-27	-28	-1732	93	3560	1704
chr1	31406142	PUM1	ENST00000257075.5	1.97641	3570	3477	3476	-84	-85	-1789	93	3560	1704
chr1	31409529	PUM1	ENST00000257075.5	1.95198	3483	3390	3389	-171	-172	-1876	93	3560	1704
chr1	31409553	PUM1	ENST00000257075.5	1.94524	3459	3366	3365	-195	-196	-1900	93	3560	1704
chr1	31409604	PUM1	ENST00000257075.5	1.93092	3408	3315	3314	-246	-247	-1951	93	3560	1704
chr1	31409644	PUM1	ENST00000257075.5	1.91969	3368	3275	3274	-286	-287	-1991	93	3560	1704
chr1	31409659	PUM1	ENST00000257075.5	1.91547	3353	3260	3259	-301	-302	-2006	93	3560	1704
chr1	31414026	PUM1	ENST00000257075.5	1.90087	3301	3208	3207	-353	-354	-2058	93	3560	1704
chr1	31414078	PUM1	ENST00000257075.5	1.88627	3249	3156	3155	-405	-406	-2110	93	3560	1704
chr1	31414086	PUM1	ENST00000257075.5	1.88402	3241	3148	3147	-413	-414	-2118	93	3560	1704
chr1	31418227	PUM1	ENST00000257075.5	1.82954	3047	2954	2953	-607	-608	-2312	93	3560	1704
chr1	31426619	PUM1	ENST00000257075.5	1.71132	2626	2533	2532	-1028	-1029	-2733	93	3560	1704
chr1	31426638	PUM1	ENST00000257075.5	1.70598	2607	2514	2513	-1047	-1048	-2752	93	3560	1704
chr1	31426767	PUM1	ENST00000257075.5	1.66976	2478	2385	2384	-1176	-1177	-2881	93	3560	1704
chr1	31437575	PUM1	ENST00000257075.5	1.63718	2362	2269	2268	-1292	-1293	-2997	93	3560	1704
chr1	31437659	PUM1	ENST00000257075.5	1.61359	2278	2185	2184	-1376	-1377	-3081	93	3560	1704
chr1	31437682	PUM1	ENST00000257075.5	1.60713	2255	2162	2161	-1399	-1400	-3104	93	3560	1704
chr1	31438921	PUM1	ENST00000257075.5	1.55996	2087	1994	1993	-1567	-1568	-3272	93	3560	1704
chr1	31438949	PUM1	ENST00000257075.5	1.55209	2059	1966	1965	-1595	-1596	-3300	93	3560	1704
chr1	31465285	PUM1	ENST00000257075.5	1.31171	1203	1110	1109	-2451	-2452	-4156	93	3560	1704
chr1	31465293	PUM1	ENST00000257075.5	1.30946	1195	1102	1101	-2459	-2460	-4164	93	3560	1704
chr1	31467957	PUM1	ENST00000257075.5	1.23336	924	831	830	-2730	-2731	-4435	93	3560	1704
chr1	31732949	SNRNP40	ENST00000263694.4	1.97207	1062	1044	1043	-30	-31	-532	18	1073	501
chr1	31782995	ZCCHC17	ENST00000344147.5	1.06887	185	50	49	-676	-677	-1419	135	725	742
chr1	31821715	ZCCHC17	ENST00000344147.5	1.63085	593	458	457	-268	-269	-1011	135	725	742
chr1	31821793	ZCCHC17	ENST00000344147.5	1.73829	671	536	535	-190	-191	-933	135	725	742
chr1	31836920	ZCCHC17	ENST00000344147.5	1.83471	741	606	605	-120	-121	-863	135	725	742
chr1	31836926	ZCCHC17	ENST00000344147.5	1.84298	747	612	611	-114	-115	-857	135	725	742
chr1	31836935	ZCCHC17	ENST00000344147.5	1.85537	756	621	620	-105	-106	-848	135	725	742
chr1	31836980	ZCCHC17	ENST00000344147.5	1.91736	801	666	665	-60	-61	-803	135	725	742
chr1	31837019	ZCCHC17	ENST00000344147.5	1.97107	840	705	704	-21	-22	-764	135	725	742
chr1	31837031	ZCCHC17	ENST00000344147.5	1.9876	852	717	716	-9	-10	-752	135	725	742
chr1	32196708	BAI2	ENST00000257070.4	1.85352	4327	3974	3973	-682	-683	-984	353	4655	301
chr1	32196728	BAI2	ENST00000257070.4	1.84923	4307	3954	3953	-702	-703	-1004	353	4655	301
chr1	32374478	PTP4A2	ENST00000344035.6	1.9504	1472	479	478	-25	-26	-2456	993	503	2430
chr1	32374510	PTP4A2	ENST00000344035.6	1.8869	1440	447	446	-57	-58	-2488	993	503	2430
chr1	32384607	PTP4A2	ENST00000344035.6	1.11905	1053	60	59	-444	-445	-2875	993	503	2430
chr1	32495975	KHDRBS1	ENST00000327300.7	1.34459	625	459	458	-873	-874	-2131	166	1331	1257
chr1	32495982	KHDRBS1	ENST00000327300.7	1.34985	632	466	465	-866	-867	-2124	166	1331	1257
chr1	32568136	TMEM39B	ENST00000336294.5	1.90669	1486	1341	1340	-138	-139	-326	145	1478	187
chr1	32568137	TMEM39B	ENST00000336294.5	1.90737	1487	1342	1341	-137	-138	-325	145	1478	187
chr1	32568172	TMEM39B	ENST00000336294.5	1.93103	1522	1377	1376	-102	-103	-290	145	1478	187
chr1	32568226	TMEM39B	ENST00000336294.5	1.96755	1576	1431	1430	-48	-49	-236	145	1478	187
chr1	32568232	TMEM39B	ENST00000336294.5	1.9716	1582	1437	1436	-42	-43	-230	145	1478	187
chr1	32568270	TMEM39B	ENST00000336294.5	1.9973	1620	1475	1474	-4	-5	-192	145	1478	187
chr1	32682464	TMEM234	ENST00000309777.6	1.97636	415	413	412	-10	-11	-666	2	422	655
chr1	32682468	TMEM234	ENST00000309777.6	1.9669	411	409	408	-14	-15	-670	2	422	655
chr1	32688176	EIF3I	ENST00000373586.1	1.04192	112	41	40	-937	-938	-1345	71	977	407
chr1	32692041	EIF3I	ENST00000373586.1	1.44785	509	438	437	-540	-541	-948	71	977	407
chr1	32696773	EIF3I	ENST00000373586.1	1.97546	1025	954	953	-24	-25	-432	71	977	407
chr1	32757781	HDAC1	ENST00000373548.3	1.00759	94	11	10	-1438	-1439	-2029	83	1448	590
chr1	32757803	HDAC1	ENST00000373548.3	1.02277	116	33	32	-1416	-1417	-2007	83	1448	590
chr1	32757809	HDAC1	ENST00000373548.3	1.02692	122	39	38	-1410	-1411	-2001	83	1448	590
chr1	32768285	HDAC1	ENST00000373548.3	1.07798	196	113	112	-1336	-1337	-1927	83	1448	590
chr1	32782316	HDAC1	ENST00000373548.3	1.147	296	213	212	-1236	-1237	-1827	83	1448	590
chr1	32792640	HDAC1	ENST00000373548.3	1.3147	539	456	455	-993	-994	-1584	83	1448	590
chr1	32793158	HDAC1	ENST00000373548.3	1.35611	599	516	515	-933	-934	-1524	83	1448	590
chr1	32800265	MARCKSL1	ENST00000329421.7	1.88605	866	521	520	-67	-68	-832	345	587	764
chr1	32936901	RP1-27O5.3	ENST00000480336.1	1.43925	765	676	675	-863	-864	-2681	89	1538	1817
chr1	32936901	ZBTB8B	ENST00000609129.1	1.4543	753	676	675	-812	-813	-12080	77	1487	11267
chr1	32950971	ZBTB8B	ENST00000609129.1	1.96774	1517	1440	1439	-48	-49	-11316	77	1487	11267
chr1	32951015	ZBTB8B	ENST00000609129.1	1.99731	1561	1484	1483	-4	-5	-11272	77	1487	11267
chr1	33058572	ZBTB8A	ENST00000316459.4	1.0391	266	40	39	-983	-984	-1676	226	1022	692
chr1	33058577	ZBTB8A	ENST00000316459.4	1.04399	271	45	44	-978	-979	-1671	226	1022	692
chr1	33058644	ZBTB8A	ENST00000316459.4	1.10948	338	112	111	-911	-912	-1604	226	1022	692
chr1	33058676	ZBTB8A	ENST00000316459.4	1.14076	370	144	143	-879	-880	-1572	226	1022	692
chr1	33058695	ZBTB8A	ENST00000316459.4	1.15934	389	163	162	-860	-861	-1553	226	1022	692
chr1	33058732	ZBTB8A	ENST00000316459.4	1.1955	426	200	199	-823	-824	-1516	226	1022	692
chr1	33058754	ZBTB8A	ENST00000316459.4	1.21701	448	222	221	-801	-802	-1494	226	1022	692
chr1	33058762	ZBTB8A	ENST00000316459.4	1.22483	456	230	229	-793	-794	-1486	226	1022	692
chr1	33058798	ZBTB8A	ENST00000316459.4	1.26002	492	266	265	-757	-758	-1450	226	1022	692
chr1	33058804	ZBTB8A	ENST00000316459.4	1.26588	498	272	271	-751	-752	-1444	226	1022	692
chr1	33058848	ZBTB8A	ENST00000316459.4	1.3089	542	316	315	-707	-708	-1400	226	1022	692
chr1	33058855	ZBTB8A	ENST00000316459.4	1.31574	549	323	322	-700	-701	-1393	226	1022	692
chr1	33058879	ZBTB8A	ENST00000316459.4	1.3392	573	347	346	-676	-677	-1369	226	1022	692
chr1	33058901	ZBTB8A	ENST00000316459.4	1.3607	595	369	368	-654	-655	-1347	226	1022	692
chr1	33058935	ZBTB8A	ENST00000316459.4	1.39394	629	403	402	-620	-621	-1313	226	1022	692
chr1	33058957	ZBTB8A	ENST00000316459.4	1.41544	651	425	424	-598	-599	-1291	226	1022	692
chr1	33059088	ZBTB8A	ENST00000316459.4	1.5435	782	556	555	-467	-468	-1160	226	1022	692
chr1	33059166	ZBTB8A	ENST00000316459.4	1.61975	860	634	633	-389	-390	-1082	226	1022	692
chr1	33059188	ZBTB8A	ENST00000316459.4	1.64125	882	656	655	-367	-368	-1060	226	1022	692
chr1	33059197	ZBTB8A	ENST00000316459.4	1.65005	891	665	664	-358	-359	-1051	226	1022	692
chr1	33059268	ZBTB8A	ENST00000316459.4	1.71945	962	736	735	-287	-288	-980	226	1022	692
chr1	33059299	ZBTB8A	ENST00000316459.4	1.74976	993	767	766	-256	-257	-949	226	1022	692
chr1	33133974	RBBP4	ENST00000373485.1	1.37226	531	459	458	-774	-775	-885	72	1232	110
chr1	33245818	YARS	ENST00000373477.4	1.7574	2110	1202	1201	-385	-386	-1127	908	1586	741
chr1	33252628	YARS	ENST00000373477.4	1.46188	1641	733	732	-854	-855	-1596	908	1586	741
chr1	33276560	YARS	ENST00000373477.4	1.0983	1064	156	155	-1431	-1432	-2173	908	1586	741
chr1	33292062	S100PBP	ENST00000373475.5	1.29503	615	362	361	-865	-866	-3702	253	1226	2836
chr1	33292089	S100PBP	ENST00000373475.5	1.31703	642	389	388	-838	-839	-3675	253	1226	2836
chr1	33292102	S100PBP	ENST00000373475.5	1.32763	655	402	401	-825	-826	-3662	253	1226	2836
chr1	33292115	S100PBP	ENST00000373475.5	1.33822	668	415	414	-812	-813	-3649	253	1226	2836
chr1	33292148	S100PBP	ENST00000373475.5	1.36512	701	448	447	-779	-780	-3616	253	1226	2836
chr1	33292194	S100PBP	ENST00000373475.5	1.40261	747	494	493	-733	-734	-3570	253	1226	2836
chr1	33292220	S100PBP	ENST00000373475.5	1.4238	773	520	519	-707	-708	-3544	253	1226	2836
chr1	33292284	S100PBP	ENST00000373475.5	1.47596	837	584	583	-643	-644	-3480	253	1226	2836
chr1	33292300	S100PBP	ENST00000373475.5	1.489	853	600	599	-627	-628	-3464	253	1226	2836
chr1	33292312	S100PBP	ENST00000373475.5	1.49878	865	612	611	-615	-616	-3452	253	1226	2836
chr1	33292344	S100PBP	ENST00000373475.5	1.52486	897	644	643	-583	-584	-3420	253	1226	2836
chr1	33292348	S100PBP	ENST00000373475.5	1.52812	901	648	647	-579	-580	-3416	253	1226	2836
chr1	33292358	S100PBP	ENST00000373475.5	1.53627	911	658	657	-569	-570	-3406	253	1226	2836
chr1	33292369	S100PBP	ENST00000373475.5	1.54523	922	669	668	-558	-559	-3395	253	1226	2836
chr1	33960637	ZSCAN20	ENST00000361328.3	1.85983	2845	2693	2692	-439	-440	-1470	152	3131	1030
chr1	33960854	ZSCAN20	ENST00000361328.3	1.92912	3062	2910	2909	-222	-223	-1253	152	3131	1030
chr1	35321324	SMIM12	ENST00000446026.1	1.91398	2143	255	254	-24	-25	-673	1888	278	648
chr1	35321379	SMIM12	ENST00000446026.1	1.71685	2088	200	199	-79	-80	-728	1888	278	648
chr1	35447576	ZMYM6NB	ENST00000373337.3	1.93333	481	434	433	-31	-32	-440	47	464	408
chr1	35449455	ZMYM6NB	ENST00000373337.3	1.43441	249	202	201	-263	-264	-672	47	464	408
chr1	35485037	ZMYM6	ENST00000487874.1	1.15884	529	345	344	-1827	-1828	-2569	184	2171	741
chr1	35485063	ZMYM6	ENST00000487874.1	1.14687	503	319	318	-1853	-1854	-2595	184	2171	741
chr1	35569982	ZMYM1	ENST00000359858.4	1.14756	655	506	505	-2923	-2924	-3519	149	3428	595
chr1	35570024	ZMYM1	ENST00000359858.4	1.15981	697	548	547	-2881	-2882	-3477	149	3428	595
chr1	35570039	ZMYM1	ENST00000359858.4	1.16419	712	563	562	-2866	-2867	-3462	149	3428	595
chr1	35578791	ZMYM1	ENST00000359858.4	1.39662	1509	1360	1359	-2069	-2070	-2665	149	3428	595
chr1	35578930	ZMYM1	ENST00000359858.4	1.43715	1648	1499	1498	-1930	-1931	-2526	149	3428	595
chr1	35579167	ZMYM1	ENST00000359858.4	1.50627	1885	1736	1735	-1693	-1694	-2289	149	3428	595
chr1	35580795	ZMYM1	ENST00000359858.4	1.98104	3513	3364	3363	-65	-66	-661	149	3428	595
chr1	35657013	SFPQ	ENST00000357214.5	1.44539	1044	946	945	-1178	-1179	-2702	98	2123	1523
chr1	35657020	SFPQ	ENST00000357214.5	1.44209	1037	939	938	-1185	-1186	-2709	98	2123	1523
chr1	35824975	ZMYM4	ENST00000314607.6	1.11513	614	535	534	-4112	-4113	-6379	79	4646	2266
chr1	35836129	ZMYM4	ENST00000314607.6	1.23284	1161	1082	1081	-3565	-3566	-5832	79	4646	2266
chr1	35846979	ZMYM4	ENST00000314607.6	1.27997	1380	1301	1300	-3346	-3347	-5613	79	4646	2266
chr1	35846988	ZMYM4	ENST00000314607.6	1.2819	1389	1310	1309	-3337	-3338	-5604	79	4646	2266
chr1	35847266	ZMYM4	ENST00000314607.6	1.31762	1555	1476	1475	-3171	-3172	-5438	79	4646	2266
chr1	35847272	ZMYM4	ENST00000314607.6	1.31892	1561	1482	1481	-3165	-3166	-5432	79	4646	2266
chr1	35847300	ZMYM4	ENST00000314607.6	1.32494	1589	1510	1509	-3137	-3138	-5404	79	4646	2266
chr1	35847312	ZMYM4	ENST00000314607.6	1.32752	1601	1522	1521	-3125	-3126	-5392	79	4646	2266
chr1	35854585	ZMYM4	ENST00000314607.6	1.50312	2417	2338	2337	-2309	-2310	-4576	79	4646	2266
chr1	35917288	KIAA0319L	ENST00000325722.3	1.63587	2237	2003	2002	-1147	-1148	-2551	234	3149	1403
chr1	35944671	KIAA0319L	ENST00000325722.3	1.25683	1043	809	808	-2341	-2342	-3745	234	3149	1403
chr1	35944689	KIAA0319L	ENST00000325722.3	1.25111	1025	791	790	-2359	-2360	-3763	234	3149	1403
chr1	35944701	KIAA0319L	ENST00000325722.3	1.2473	1013	779	778	-2371	-2372	-3775	234	3149	1403
chr1	35972232	KIAA0319L	ENST00000325722.3	1.2054	881	647	646	-2503	-2504	-3907	234	3149	1403
chr1	35972277	KIAA0319L	ENST00000325722.3	1.19111	836	602	601	-2548	-2549	-3952	234	3149	1403
chr1	35972297	KIAA0319L	ENST00000325722.3	1.18476	816	582	581	-2568	-2569	-3972	234	3149	1403
chr1	35972502	KIAA0319L	ENST00000325722.3	1.11968	611	377	376	-2773	-2774	-4177	234	3149	1403
chr1	36074879	PSMB2	ENST00000373237.3	1.68647	827	416	415	-190	-191	-1873	411	605	1682
chr1	36101969	PSMB2	ENST00000373237.3	1.25743	567	156	155	-450	-451	-2133	411	605	1682
chr1	36219468	CLSPN	ENST00000251195.5	1.41235	1745	1649	1648	-2350	-2351	-3023	96	3998	672
chr1	36226207	CLSPN	ENST00000251195.5	1.32883	1411	1315	1314	-2684	-2685	-3357	96	3998	672
chr1	36226285	CLSPN	ENST00000251195.5	1.30933	1333	1237	1236	-2762	-2763	-3435	96	3998	672
chr1	36226392	CLSPN	ENST00000251195.5	1.28257	1226	1130	1129	-2869	-2870	-3542	96	3998	672
chr1	36226451	CLSPN	ENST00000251195.5	1.26782	1167	1071	1070	-2928	-2929	-3601	96	3998	672
chr1	36226461	CLSPN	ENST00000251195.5	1.26532	1157	1061	1060	-2938	-2939	-3611	96	3998	672
chr1	36226464	CLSPN	ENST00000251195.5	1.26457	1154	1058	1057	-2941	-2942	-3614	96	3998	672
chr1	36228893	CLSPN	ENST00000251195.5	1.15304	708	612	611	-3387	-3388	-4060	96	3998	672
chr1	36229932	CLSPN	ENST00000251195.5	1.12928	613	517	516	-3482	-3483	-4155	96	3998	672
chr1	36230008	CLSPN	ENST00000251195.5	1.11028	537	441	440	-3558	-3559	-4231	96	3998	672
chr1	36230012	CLSPN	ENST00000251195.5	1.10928	533	437	436	-3562	-3563	-4235	96	3998	672
chr1	36230015	CLSPN	ENST00000251195.5	1.10853	530	434	433	-3565	-3566	-4238	96	3998	672
chr1	36230107	CLSPN	ENST00000251195.5	1.08552	438	342	341	-3657	-3658	-4330	96	3998	672
chr1	36230137	CLSPN	ENST00000251195.5	1.07802	408	312	311	-3687	-3688	-4360	96	3998	672
chr1	36230156	CLSPN	ENST00000251195.5	1.07327	389	293	292	-3706	-3707	-4379	96	3998	672
chr1	36230203	CLSPN	ENST00000251195.5	1.06152	342	246	245	-3753	-3754	-4426	96	3998	672
chr1	36230234	CLSPN	ENST00000251195.5	1.05376	311	215	214	-3784	-3785	-4457	96	3998	672
chr1	36230243	CLSPN	ENST00000251195.5	1.05151	302	206	205	-3793	-3794	-4466	96	3998	672
chr1	36432614	AGO3	ENST00000324350.5	1.36232	528	250	249	-440	-441	-1197	278	689	756
chr1	36558933	ADPRHL2	ENST00000373178.4	1.95055	1067	1038	1037	-54	-55	-600	29	1091	545
chr1	36558945	ADPRHL2	ENST00000373178.4	1.96154	1079	1050	1049	-42	-43	-588	29	1091	545
chr1	36602828	TRAPPC3	ENST00000373166.3	1.9558	609	519	518	-24	-25	-655	90	542	630
chr1	36602865	TRAPPC3	ENST00000373166.3	1.88766	572	482	481	-61	-62	-692	90	542	630
chr1	36603457	TRAPPC3	ENST00000373166.3	1.66851	453	363	362	-180	-181	-811	90	542	630
chr1	36603539	TRAPPC3	ENST00000373166.3	1.5175	371	281	280	-262	-263	-893	90	542	630
chr1	36603553	TRAPPC3	ENST00000373166.3	1.49171	357	267	266	-276	-277	-907	90	542	630
chr1	36605711	TRAPPC3	ENST00000373166.3	1.18232	189	99	98	-444	-445	-1075	90	542	630
chr1	36748241	THRAP3	ENST00000354618.5	1.02685	300	77	76	-2791	-2792	-4131	223	2867	1339
chr1	36752059	THRAP3	ENST00000354618.5	1.0795	451	228	227	-2640	-2641	-3980	223	2867	1339
chr1	36752259	THRAP3	ENST00000354618.5	1.14923	651	428	427	-2440	-2441	-3780	223	2867	1339
chr1	36859379	LSM10	ENST00000315732.2	1.94624	501	352	351	-20	-21	-348	149	371	327
chr1	36859453	LSM10	ENST00000315732.2	1.74731	427	278	277	-94	-95	-422	149	371	327
chr1	36859464	LSM10	ENST00000315732.2	1.71774	416	267	266	-105	-106	-433	149	371	327
chr1	36859482	LSM10	ENST00000315732.2	1.66935	398	249	248	-123	-124	-451	149	371	327
chr1	36859507	LSM10	ENST00000315732.2	1.60215	373	224	223	-148	-149	-476	149	371	327
chr1	36859530	LSM10	ENST00000315732.2	1.54032	350	201	200	-171	-172	-499	149	371	327
chr1	36859552	LSM10	ENST00000315732.2	1.48118	328	179	178	-193	-194	-521	149	371	327
chr1	36859554	LSM10	ENST00000315732.2	1.47581	326	177	176	-195	-196	-523	149	371	327
chr1	36898110	OSCP1	ENST00000235532.5	1.30526	429	348	347	-792	-793	-1025	81	1139	232
chr1	36921398	MRPS15	ENST00000373116.5	1.98837	926	765	764	-9	-10	-79	161	773	69
chr1	36921404	MRPS15	ENST00000373116.5	1.98062	920	759	758	-15	-16	-85	161	773	69
chr1	36921810	MRPS15	ENST00000373116.5	1.79328	775	614	613	-160	-161	-230	161	773	69
chr1	36921857	MRPS15	ENST00000373116.5	1.73256	728	567	566	-207	-208	-277	161	773	69
chr1	36921917	MRPS15	ENST00000373116.5	1.65504	668	507	506	-267	-268	-337	161	773	69
chr1	38003520	SNIP1	ENST00000296215.6	1.85642	1092	1020	1019	-171	-172	-3470	72	1190	3298
chr1	38003526	SNIP1	ENST00000296215.6	1.85139	1086	1014	1013	-177	-178	-3476	72	1190	3298
chr1	38005852	SNIP1	ENST00000296215.6	1.69857	904	832	831	-359	-360	-3658	72	1190	3298
chr1	38005901	SNIP1	ENST00000296215.6	1.65743	855	783	782	-408	-409	-3707	72	1190	3298
chr1	38005971	SNIP1	ENST00000296215.6	1.59866	785	713	712	-478	-479	-3777	72	1190	3298
chr1	38005998	SNIP1	ENST00000296215.6	1.57599	758	686	685	-505	-506	-3804	72	1190	3298
chr1	38006178	SNIP1	ENST00000296215.6	1.42485	578	506	505	-685	-686	-3984	72	1190	3298
chr1	38034484	GNL2	ENST00000373062.3	1.83607	1934	1836	1835	-360	-361	-399	98	2195	38
chr1	38034709	GNL2	ENST00000373062.3	1.73361	1709	1611	1610	-585	-586	-624	98	2195	38
chr1	38040010	GNL2	ENST00000373062.3	1.61475	1448	1350	1349	-846	-847	-885	98	2195	38
chr1	38040293	GNL2	ENST00000373062.3	1.5806	1373	1275	1274	-921	-922	-960	98	2195	38
chr1	38042081	GNL2	ENST00000373062.3	1.449	1084	986	985	-1210	-1211	-1249	98	2195	38
chr1	38042139	GNL2	ENST00000373062.3	1.42259	1026	928	927	-1268	-1269	-1307	98	2195	38
chr1	38047876	GNL2	ENST00000373062.3	1.39026	955	857	856	-1339	-1340	-1378	98	2195	38
chr1	38048458	GNL2	ENST00000373062.3	1.32605	814	716	715	-1480	-1481	-1519	98	2195	38
chr1	38048466	GNL2	ENST00000373062.3	1.3224	806	708	707	-1488	-1489	-1527	98	2195	38
chr1	38048477	GNL2	ENST00000373062.3	1.3174	795	697	696	-1499	-1500	-1538	98	2195	38
chr1	38048479	GNL2	ENST00000373062.3	1.31648	793	695	694	-1501	-1502	-1540	98	2195	38
chr1	38052930	GNL2	ENST00000373062.3	1.25091	649	551	550	-1645	-1646	-1684	98	2195	38
chr1	38053053	GNL2	ENST00000373062.3	1.1949	526	428	427	-1768	-1769	-1807	98	2195	38
chr1	38265554	MANEAL	ENST00000329006.5	1.54661	674	387	386	-321	-322	-1255	287	707	933
chr1	38265587	MANEAL	ENST00000329006.5	1.59322	707	420	419	-288	-289	-1222	287	707	933
chr1	38265614	MANEAL	ENST00000329006.5	1.63136	734	447	446	-261	-262	-1195	287	707	933
chr1	38265617	MANEAL	ENST00000329006.5	1.63559	737	450	449	-258	-259	-1192	287	707	933
chr1	38280858	MTF1	ENST00000373036.4	1.9779	2352	2212	2211	-50	-51	-5619	140	2261	5568
chr1	38280917	MTF1	ENST00000373036.4	1.95181	2293	2153	2152	-109	-110	-5678	140	2261	5568
chr1	38280938	MTF1	ENST00000373036.4	1.94253	2272	2132	2131	-130	-131	-5699	140	2261	5568
chr1	38280944	MTF1	ENST00000373036.4	1.93988	2266	2126	2125	-136	-137	-5705	140	2261	5568
chr1	38280948	MTF1	ENST00000373036.4	1.93811	2262	2122	2121	-140	-141	-5709	140	2261	5568
chr1	38280972	MTF1	ENST00000373036.4	1.9275	2238	2098	2097	-164	-165	-5733	140	2261	5568
chr1	38281001	MTF1	ENST00000373036.4	1.91468	2209	2069	2068	-193	-194	-5762	140	2261	5568
chr1	38287843	MTF1	ENST00000373036.4	1.75906	1857	1717	1716	-545	-546	-6114	140	2261	5568
chr1	38287847	MTF1	ENST00000373036.4	1.75729	1853	1713	1712	-549	-550	-6118	140	2261	5568
chr1	38287852	MTF1	ENST00000373036.4	1.75508	1848	1708	1707	-554	-555	-6123	140	2261	5568
chr1	38287887	MTF1	ENST00000373036.4	1.73961	1813	1673	1672	-589	-590	-6158	140	2261	5568
chr1	38287904	MTF1	ENST00000373036.4	1.7321	1796	1656	1655	-606	-607	-6175	140	2261	5568
chr1	38287914	MTF1	ENST00000373036.4	1.72767	1786	1646	1645	-616	-617	-6185	140	2261	5568
chr1	38287926	MTF1	ENST00000373036.4	1.72237	1774	1634	1633	-628	-629	-6197	140	2261	5568
chr1	38288005	MTF1	ENST00000373036.4	1.68744	1695	1555	1554	-707	-708	-6276	140	2261	5568
chr1	38288164	MTF1	ENST00000373036.4	1.61715	1536	1396	1395	-866	-867	-6435	140	2261	5568
chr1	38305726	MTF1	ENST00000373036.4	1.22679	653	513	512	-1749	-1750	-7318	140	2261	5568
chr1	38322931	MTF1	ENST00000373036.4	1.17683	540	400	399	-1862	-1863	-7431	140	2261	5568
chr1	38323121	MTF1	ENST00000373036.4	1.09284	350	210	209	-2052	-2053	-7621	140	2261	5568
chr1	38423861	SF3A3	ENST00000373019.4	1.99801	2458	1503	1502	-3	-4	-1214	955	1505	1210
chr1	38423872	SF3A3	ENST00000373019.4	1.9907	2447	1492	1491	-14	-15	-1225	955	1505	1210
chr1	38483415	UTP11L	ENST00000373014.4	1.26378	261	201	200	-561	-562	-1757	60	761	1195
chr1	39305256	RRAGC	ENST00000373001.3	1.97417	1345	1169	1168	-31	-32	-1386	176	1199	1354
chr1	39305303	RRAGC	ENST00000373001.3	1.935	1298	1122	1121	-78	-79	-1433	176	1199	1354
chr1	39305310	RRAGC	ENST00000373001.3	1.92917	1291	1115	1114	-85	-86	-1440	176	1199	1354
chr1	39321460	RRAGC	ENST00000373001.3	1.4675	737	561	560	-639	-640	-1994	176	1199	1354
chr1	40034518	PABPC4	ENST00000372856.3	1.43882	1631	832	831	-1064	-1065	-1384	799	1895	319
chr1	40214677	PPIE	ENST00000324379.5	1.67439	629	611	610	-295	-296	-647	18	905	351
chr1	40214735	PPIE	ENST00000324379.5	1.73841	687	669	668	-237	-238	-589	18	905	351
chr1	40214752	PPIE	ENST00000324379.5	1.75717	704	686	685	-220	-221	-572	18	905	351
chr1	40430943	MFSD2A	ENST00000372809.5	1.27757	595	453	452	-1179	-1180	-1577	142	1631	397
chr1	40654796	RLF	ENST00000372771.4	1.05344	333	307	306	-5438	-5439	-5912	26	5744	473
chr1	40661412	RLF	ENST00000372771.4	1.10148	609	583	582	-5162	-5163	-5636	26	5744	473
chr1	40697245	RLF	ENST00000372771.4	1.17476	1030	1004	1003	-4741	-4742	-5215	26	5744	473
chr1	40701635	RLF	ENST00000372771.4	1.2195	1287	1261	1260	-4484	-4485	-4958	26	5744	473
chr1	40701677	RLF	ENST00000372771.4	1.22681	1329	1303	1302	-4442	-4443	-4916	26	5744	473
chr1	40701814	RLF	ENST00000372771.4	1.25065	1466	1440	1439	-4305	-4306	-4779	26	5744	473
chr1	40701843	RLF	ENST00000372771.4	1.2557	1495	1469	1468	-4276	-4277	-4750	26	5744	473
chr1	40701905	RLF	ENST00000372771.4	1.26649	1557	1531	1530	-4214	-4215	-4688	26	5744	473
chr1	40701938	RLF	ENST00000372771.4	1.27224	1590	1564	1563	-4181	-4182	-4655	26	5744	473
chr1	40702033	RLF	ENST00000372771.4	1.28877	1685	1659	1658	-4086	-4087	-4560	26	5744	473
chr1	40702082	RLF	ENST00000372771.4	1.2973	1734	1708	1707	-4037	-4038	-4511	26	5744	473
chr1	40702088	RLF	ENST00000372771.4	1.29835	1740	1714	1713	-4031	-4032	-4505	26	5744	473
chr1	40702558	RLF	ENST00000372771.4	1.38016	2210	2184	2183	-3561	-3562	-4035	26	5744	473
chr1	40702562	RLF	ENST00000372771.4	1.38085	2214	2188	2187	-3557	-3558	-4031	26	5744	473
chr1	40702574	RLF	ENST00000372771.4	1.38294	2226	2200	2199	-3545	-3546	-4019	26	5744	473
chr1	40734127	ZMPSTE24	ENST00000372759.3	1.27591	558	394	393	-1034	-1035	-2549	164	1427	1514
chr1	40734143	ZMPSTE24	ENST00000372759.3	1.28711	574	410	409	-1018	-1019	-2533	164	1427	1514
chr1	40734170	ZMPSTE24	ENST00000372759.3	1.30602	601	437	436	-991	-992	-2506	164	1427	1514
chr1	40735693	ZMPSTE24	ENST00000372759.3	1.36485	685	521	520	-907	-908	-2422	164	1427	1514
chr1	40735722	ZMPSTE24	ENST00000372759.3	1.38515	714	550	549	-878	-879	-2393	164	1427	1514
chr1	40735728	ZMPSTE24	ENST00000372759.3	1.38936	720	556	555	-872	-873	-2387	164	1427	1514
chr1	40735783	ZMPSTE24	ENST00000372759.3	1.42787	775	611	610	-817	-818	-2332	164	1427	1514
chr1	40737610	ZMPSTE24	ENST00000372759.3	1.47059	836	672	671	-756	-757	-2271	164	1427	1514
chr1	40747095	ZMPSTE24	ENST00000372759.3	1.59524	1014	850	849	-578	-579	-2093	164	1427	1514
chr1	40747113	ZMPSTE24	ENST00000372759.3	1.60784	1032	868	867	-560	-561	-2075	164	1427	1514
chr1	40747124	ZMPSTE24	ENST00000372759.3	1.61555	1043	879	878	-549	-550	-2064	164	1427	1514
chr1	40756663	ZMPSTE24	ENST00000372759.3	1.83824	1361	1197	1196	-231	-232	-1746	164	1427	1514
chr1	40758230	ZMPSTE24	ENST00000372759.3	1.92227	1481	1317	1316	-111	-112	-1626	164	1427	1514
chr1	40758269	ZMPSTE24	ENST00000372759.3	1.94958	1520	1356	1355	-72	-73	-1587	164	1427	1514
chr1	40758338	ZMPSTE24	ENST00000372759.3	1.9979	1589	1425	1424	-3	-4	-1518	164	1427	1514
chr1	40961451	ZFP69	ENST00000372705.3	1.8229	1594	1301	1300	-280	-281	-509	293	1580	228
chr1	40961467	ZFP69	ENST00000372705.3	1.83302	1610	1317	1316	-264	-265	-493	293	1580	228
chr1	40961507	ZFP69	ENST00000372705.3	1.85832	1650	1357	1356	-224	-225	-453	293	1580	228
chr1	40961531	ZFP69	ENST00000372705.3	1.8735	1674	1381	1380	-200	-201	-429	293	1580	228
chr1	40980397	EXO5	ENST00000296380.4	1.16132	385	181	180	-941	-942	-1831	204	1121	889
chr1	40980402	EXO5	ENST00000296380.4	1.16578	390	186	185	-936	-937	-1826	204	1121	889
chr1	40980479	EXO5	ENST00000296380.4	1.2344	467	263	262	-859	-860	-1749	204	1121	889
chr1	40980742	EXO5	ENST00000296380.4	1.46881	730	526	525	-596	-597	-1486	204	1121	889
chr1	40980870	EXO5	ENST00000296380.4	1.58289	858	654	653	-468	-469	-1358	204	1121	889
chr1	40981055	EXO5	ENST00000296380.4	1.74777	1043	839	838	-283	-284	-1173	204	1121	889
chr1	41223837	NFYC	ENST00000425457.2	1.40563	591	432	431	-633	-634	-944	159	1064	310
chr1	41228617	NFYC	ENST00000425457.2	1.58122	778	619	618	-446	-447	-757	159	1064	310
chr1	41236497	NFYC	ENST00000425457.2	1.99718	1221	1062	1061	-3	-4	-314	159	1064	310
chr1	41450655	CTPS1	ENST00000372616.1	1.18525	458	329	328	-1447	-1448	-1578	129	1775	130
chr1	41608614	SCMH1	ENST00000326197.7	1.16036	617	318	317	-1665	-1666	-2657	299	1982	991
chr1	41608641	SCMH1	ENST00000326197.7	1.14675	590	291	290	-1692	-1693	-2684	299	1982	991
chr1	42880258	RIMKLA	ENST00000431473.3	1.67092	917	789	788	-387	-388	-7991	128	1175	7603
chr1	42880321	RIMKLA	ENST00000431473.3	1.72449	980	852	851	-324	-325	-7928	128	1175	7603
chr1	42880351	RIMKLA	ENST00000431473.3	1.75	1010	882	881	-294	-295	-7898	128	1175	7603
chr1	42880532	RIMKLA	ENST00000431473.3	1.90391	1191	1063	1062	-113	-114	-7717	128	1175	7603
chr1	42880563	RIMKLA	ENST00000431473.3	1.93027	1222	1094	1093	-82	-83	-7686	128	1175	7603
chr1	42922470	PPCS	ENST00000372560.3	1.36449	260	234	233	-408	-409	-532	26	641	123
chr1	43162381	YBX1	ENST00000321358.7	1.43385	561	423	422	-552	-553	-952	138	974	399
chr1	43162397	YBX1	ENST00000321358.7	1.45026	577	439	438	-536	-537	-936	138	974	399
chr1	43162406	YBX1	ENST00000321358.7	1.45949	586	448	447	-527	-528	-927	138	974	399
chr1	43162424	YBX1	ENST00000321358.7	1.47795	604	466	465	-509	-510	-909	138	974	399
chr1	43166471	YBX1	ENST00000321358.7	1.77949	898	760	759	-215	-216	-615	138	974	399
chr1	43166664	YBX1	ENST00000321358.7	1.97744	1091	953	952	-22	-23	-422	138	974	399
chr1	43215897	LEPRE1	ENST00000236040.4	1.69565	1720	1680	1679	-735	-736	-1272	40	2414	536
chr1	43215921	LEPRE1	ENST00000236040.4	1.68571	1696	1656	1655	-759	-760	-1296	40	2414	536
chr1	43223532	LEPRE1	ENST00000236040.4	1.41491	1042	1002	1001	-1413	-1414	-1950	40	2414	536
chr1	43240485	C1orf50	ENST00000372525.5	1.6	402	360	359	-240	-241	-593	42	599	352
chr1	43240925	C1orf50	ENST00000372525.5	1.76667	502	460	459	-140	-141	-493	42	599	352
chr1	43241013	C1orf50	ENST00000372525.5	1.91333	590	548	547	-52	-53	-405	42	599	352
chr1	43241058	C1orf50	ENST00000372525.5	1.98833	635	593	592	-7	-8	-360	42	599	352
chr1	43316766	ZNF691	ENST00000372504.1	1.22041	552	203	202	-718	-719	-1382	349	920	663
chr1	43316931	ZNF691	ENST00000372504.1	1.39957	717	368	367	-553	-554	-1217	349	920	663
chr1	43317328	ZNF691	ENST00000372504.1	1.83062	1114	765	764	-156	-157	-820	349	920	663
chr1	43829746	ELOVL1	ENST00000372458.3	1.81071	798	681	680	-159	-160	-678	117	839	518
chr1	43829749	ELOVL1	ENST00000372458.3	1.80714	795	678	677	-162	-163	-681	117	839	518
chr1	43829767	ELOVL1	ENST00000372458.3	1.78571	777	660	659	-180	-181	-699	117	839	518
chr1	44118893	KDM4A	ENST00000372396.3	1.01471	180	47	46	-3148	-3149	-4293	133	3194	1144
chr1	44365348	ST3GAL3	ENST00000262915.3	1.67416	1076	900	899	-435	-436	-1372	176	1334	936
chr1	44386552	ST3GAL3	ENST00000262915.3	1.89663	1373	1197	1196	-138	-139	-1075	176	1334	936
chr1	44415760	IPO13	ENST00000372343.3	1.26141	1417	756	755	-2136	-2137	-2476	661	2891	339
chr1	44435918	DPH2	ENST00000255108.3	1.0483	242	71	70	-1399	-1400	-2229	171	1469	829
chr1	44437639	DPH2	ENST00000255108.3	1.72449	1236	1065	1064	-405	-406	-1235	171	1469	829
chr1	44437649	DPH2	ENST00000255108.3	1.73129	1246	1075	1074	-395	-396	-1225	171	1469	829
chr1	44437895	DPH2	ENST00000255108.3	1.83946	1405	1234	1233	-236	-237	-1066	171	1469	829
chr1	44443676	ATP6V0B	ENST00000236067.4	1.99371	658	474	473	-3	-4	-285	184	476	281
chr1	44713638	ERI3	ENST00000372257.2	1.89152	1085	904	903	-110	-111	-598	181	1013	487
chr1	44804738	ERI3	ENST00000372257.2	1.46154	649	468	467	-546	-547	-1034	181	1013	487
chr1	44804771	ERI3	ENST00000372257.2	1.42899	616	435	434	-579	-580	-1067	181	1013	487
chr1	44820572	ERI3	ENST00000372257.2	1.12525	308	127	126	-887	-888	-1375	181	1013	487
chr1	44878061	RNF220	ENST00000355387.2	1.17166	741	292	291	-1409	-1410	-2357	449	1700	947
chr1	44878210	RNF220	ENST00000355387.2	1.25926	890	441	440	-1260	-1261	-2208	449	1700	947
chr1	45271306	PLK3	ENST00000372201.4	1.97733	2135	1897	1896	-44	-45	-356	238	1940	311
chr1	45796922	MUTYH	ENST00000354383.6	1.84576	1437	1327	1326	-242	-243	-306	110	1568	63
chr1	45797107	MUTYH	ENST00000354383.6	1.78203	1337	1227	1226	-342	-343	-406	110	1568	63
chr1	45797384	MUTYH	ENST00000354383.6	1.67177	1164	1054	1053	-515	-516	-579	110	1568	63
chr1	45808781	TOE1	ENST00000372090.5	1.61318	1522	940	939	-593	-594	-866	582	1532	272
chr1	45810573	TESK2	ENST00000341771.6	1.96255	1970	1568	1567	-61	-62	-1018	402	1628	956
chr1	45980648	PRDX1	ENST00000262746.1	1.46667	619	280	279	-320	-321	-613	339	599	292
chr1	45981343	PRDX1	ENST00000262746.1	1.405	582	243	242	-357	-358	-650	339	599	292
chr1	45981347	PRDX1	ENST00000262746.1	1.39833	578	239	238	-361	-362	-654	339	599	292
chr1	45981376	PRDX1	ENST00000262746.1	1.35	549	210	209	-390	-391	-683	339	599	292
chr1	45984617	PRDX1	ENST00000262746.1	1.165	438	99	98	-501	-502	-794	339	599	292
chr1	46156768	TMEM69	ENST00000372025.4	1.03763	1184	28	27	-716	-717	-1254	1156	743	537
chr1	46158910	TMEM69	ENST00000372025.4	1.10349	1233	77	76	-667	-668	-1205	1156	743	537
chr1	46158931	TMEM69	ENST00000372025.4	1.13172	1254	98	97	-646	-647	-1184	1156	743	537
chr1	46159068	TMEM69	ENST00000372025.4	1.31586	1391	235	234	-509	-510	-1047	1156	743	537
chr1	46159446	TMEM69	ENST00000372025.4	1.82392	1769	613	612	-131	-132	-669	1156	743	537
chr1	46159489	TMEM69	ENST00000372025.4	1.88172	1812	656	655	-88	-89	-626	1156	743	537
chr1	46206888	IPP	ENST00000396478.3	1.23305	511	409	408	-1346	-1347	-2601	102	1754	1254
chr1	46206938	IPP	ENST00000396478.3	1.20456	461	359	358	-1396	-1397	-2651	102	1754	1254
chr1	46500584	MAST2	ENST00000361297.2	1.78618	4525	4243	4242	-1154	-1155	-1212	282	5396	57
chr1	46501242	MAST2	ENST00000361297.2	1.9081	5183	4901	4900	-496	-497	-554	282	5396	57
chr1	46501339	MAST2	ENST00000361297.2	1.92607	5280	4998	4997	-399	-400	-457	282	5396	57
chr1	46501455	MAST2	ENST00000361297.2	1.94756	5396	5114	5113	-283	-284	-341	282	5396	57
chr1	46501478	MAST2	ENST00000361297.2	1.95183	5419	5137	5136	-260	-261	-318	282	5396	57
chr1	46532704	PIK3R3	ENST00000262741.5	1.26984	1063	374	373	-1012	-1013	-4545	689	1385	3532
chr1	46597619	PIK3R3	ENST00000262741.5	1.00433	695	6	5	-1380	-1381	-4913	689	1385	3532
chr1	46745872	LRRC41	ENST00000343304.6	1.82493	2297	2012	2011	-427	-428	-892	285	2438	464
chr1	46810777	NSUN4	ENST00000474844.1	1.34459	1047	398	397	-757	-758	-1102	649	1154	344
chr1	46827388	NSUN4	ENST00000474844.1	1.88745	1674	1025	1024	-130	-131	-475	649	1154	344
chr1	46827390	NSUN4	ENST00000474844.1	1.88918	1676	1027	1026	-128	-129	-473	649	1154	344
chr1	47075731	MOB3C	ENST00000271139.8	1.89219	776	720	719	-87	-88	-2023	56	806	1935
chr1	47144188	EFCAB14	ENST00000371933.3	1.96304	2409	1433	1432	-55	-56	-3357	976	1487	3301
chr1	47716822	STIL	ENST00000243182.6	1.99638	4080	3850	3849	-14	-15	-528	230	3863	513
chr1	47716837	STIL	ENST00000243182.6	1.99249	4065	3835	3834	-29	-30	-543	230	3863	513
chr1	47717097	STIL	ENST00000243182.6	1.92521	3805	3575	3574	-289	-290	-803	230	3863	513
chr1	47717130	STIL	ENST00000243182.6	1.91667	3772	3542	3541	-322	-323	-836	230	3863	513
chr1	47717251	STIL	ENST00000243182.6	1.88535	3651	3421	3420	-443	-444	-957	230	3863	513
chr1	47717284	STIL	ENST00000243182.6	1.87681	3618	3388	3387	-476	-477	-990	230	3863	513
chr1	47726090	STIL	ENST00000243182.6	1.76294	3178	2948	2947	-916	-917	-1430	230	3863	513
chr1	47735415	STIL	ENST00000243182.6	1.64881	2737	2507	2506	-1357	-1358	-1871	230	3863	513
chr1	47767251	STIL	ENST00000243182.6	1.11258	665	435	434	-3429	-3430	-3943	230	3863	513
chr1	47767295	STIL	ENST00000243182.6	1.10119	621	391	390	-3473	-3474	-3987	230	3863	513
chr1	47767297	STIL	ENST00000243182.6	1.10067	619	389	388	-3475	-3476	-3989	230	3863	513
chr1	47834207	CMPK1	ENST00000371873.5	1.34643	386	238	237	-449	-450	-2543	148	686	2093
chr1	47834219	CMPK1	ENST00000371873.5	1.3639	398	250	249	-437	-438	-2531	148	686	2093
chr1	47834233	CMPK1	ENST00000371873.5	1.38428	412	264	263	-423	-424	-2517	148	686	2093
chr1	47834255	CMPK1	ENST00000371873.5	1.4163	434	286	285	-401	-402	-2495	148	686	2093
chr1	47838657	CMPK1	ENST00000371873.5	1.50801	497	349	348	-338	-339	-2432	148	686	2093
chr1	47838687	CMPK1	ENST00000371873.5	1.55167	527	379	378	-308	-309	-2402	148	686	2093
chr1	47838758	CMPK1	ENST00000371873.5	1.65502	598	450	449	-237	-238	-2331	148	686	2093
chr1	47838767	CMPK1	ENST00000371873.5	1.66812	607	459	458	-228	-229	-2322	148	686	2093
chr1	47840955	CMPK1	ENST00000371873.5	1.92431	783	635	634	-52	-53	-2146	148	686	2093
chr1	51439694	CDKN2C	ENST00000262662.1	1.51085	2292	259	258	-248	-249	-611	2033	506	362
chr1	51439698	CDKN2C	ENST00000262662.1	1.51874	2296	263	262	-244	-245	-607	2033	506	362
chr1	51439712	CDKN2C	ENST00000262662.1	1.54635	2310	277	276	-230	-231	-593	2033	506	362
chr1	51439726	CDKN2C	ENST00000262662.1	1.57396	2324	291	290	-216	-217	-579	2033	506	362
chr1	51439759	CDKN2C	ENST00000262662.1	1.63905	2357	324	323	-183	-184	-546	2033	506	362
chr1	51439849	CDKN2C	ENST00000262662.1	1.81657	2447	414	413	-93	-94	-456	2033	506	362
chr1	51439929	CDKN2C	ENST00000262662.1	1.97436	2527	494	493	-13	-14	-376	2033	506	362
chr1	51735671	RNF11	ENST00000242719.3	1.35914	652	167	166	-298	-299	-2431	485	464	2132
chr1	51753845	TTC39A	ENST00000413473.2	1.99084	1802	1730	1729	-16	-17	-915	72	1745	898
chr1	52250176	OSBPL9	ENST00000337809.4	1.79335	1947	1766	1765	-460	-461	-1888	181	2225	1427
chr1	52260150	NRD1	ENST00000352171.7	1.80122	2958	2769	2768	-687	-688	-732	189	3455	44
chr1	52260168	NRD1	ENST00000352171.7	1.79601	2940	2751	2750	-705	-706	-750	189	3455	44
chr1	52260183	NRD1	ENST00000352171.7	1.79167	2925	2736	2735	-720	-721	-765	189	3455	44
chr1	52263995	NRD1	ENST00000352171.7	1.73206	2719	2530	2529	-926	-927	-971	189	3455	44
chr1	52264014	NRD1	ENST00000352171.7	1.72656	2700	2511	2510	-945	-946	-990	189	3455	44
chr1	52264035	NRD1	ENST00000352171.7	1.72049	2679	2490	2489	-966	-967	-1011	189	3455	44
chr1	52266257	NRD1	ENST00000352171.7	1.69792	2601	2412	2411	-1044	-1045	-1089	189	3455	44
chr1	52266263	NRD1	ENST00000352171.7	1.69618	2595	2406	2405	-1050	-1051	-1095	189	3455	44
chr1	52269530	NRD1	ENST00000352171.7	1.65654	2458	2269	2268	-1187	-1188	-1232	189	3455	44
chr1	52269594	NRD1	ENST00000352171.7	1.63802	2394	2205	2204	-1251	-1252	-1296	189	3455	44
chr1	52272479	NRD1	ENST00000352171.7	1.60677	2286	2097	2096	-1359	-1360	-1404	189	3455	44
chr1	52299709	NRD1	ENST00000352171.7	1.24479	1035	846	845	-2610	-2611	-2655	189	3455	44
chr1	52299736	NRD1	ENST00000352171.7	1.23698	1008	819	818	-2637	-2638	-2682	189	3455	44
chr1	52299744	NRD1	ENST00000352171.7	1.23466	1000	811	810	-2645	-2646	-2690	189	3455	44
chr1	52305965	NRD1	ENST00000352171.7	1.16291	752	563	562	-2893	-2894	-2938	189	3455	44
chr1	52399048	RAB3B	ENST00000371655.3	1.62727	626	414	413	-246	-247	-12217	212	659	11970
chr1	52486648	TXNDC12	ENST00000371626.4	1.91715	1550	476	475	-43	-44	-845	1074	518	801
chr1	52498398	KTI12	ENST00000371614.1	1.97277	1090	1036	1035	-29	-30	-623	54	1064	593
chr1	52498405	KTI12	ENST00000371614.1	1.9662	1083	1029	1028	-36	-37	-630	54	1064	593
chr1	52498413	KTI12	ENST00000371614.1	1.95869	1075	1021	1020	-44	-45	-638	54	1064	593
chr1	52498432	KTI12	ENST00000371614.1	1.94085	1056	1002	1001	-63	-64	-657	54	1064	593
chr1	52498450	KTI12	ENST00000371614.1	1.92394	1038	984	983	-81	-82	-675	54	1064	593
chr1	52498709	KTI12	ENST00000371614.1	1.68075	779	725	724	-340	-341	-934	54	1064	593
chr1	52498927	KTI12	ENST00000371614.1	1.47606	561	507	506	-558	-559	-1152	54	1064	593
chr1	52703548	ZFYVE9	ENST00000287727.3	1.10729	630	459	458	-3819	-3820	-4283	171	4277	463
chr1	52703576	ZFYVE9	ENST00000287727.3	1.11384	658	487	486	-3791	-3792	-4255	171	4277	463
chr1	52703642	ZFYVE9	ENST00000287727.3	1.12927	724	553	552	-3725	-3726	-4189	171	4277	463
chr1	52703656	ZFYVE9	ENST00000287727.3	1.13254	738	567	566	-3711	-3712	-4175	171	4277	463
chr1	52703660	ZFYVE9	ENST00000287727.3	1.13347	742	571	570	-3707	-3708	-4171	171	4277	463
chr1	52703669	ZFYVE9	ENST00000287727.3	1.13558	751	580	579	-3698	-3699	-4162	171	4277	463
chr1	52703697	ZFYVE9	ENST00000287727.3	1.14212	779	608	607	-3670	-3671	-4134	171	4277	463
chr1	52703874	ZFYVE9	ENST00000287727.3	1.1835	956	785	784	-3493	-3494	-3957	171	4277	463
chr1	52704072	ZFYVE9	ENST00000287727.3	1.22978	1154	983	982	-3295	-3296	-3759	171	4277	463
chr1	52704075	ZFYVE9	ENST00000287727.3	1.23048	1157	986	985	-3292	-3293	-3756	171	4277	463
chr1	52704165	ZFYVE9	ENST00000287727.3	1.25152	1247	1076	1075	-3202	-3203	-3666	171	4277	463
chr1	52704218	ZFYVE9	ENST00000287727.3	1.26391	1300	1129	1128	-3149	-3150	-3613	171	4277	463
chr1	52704228	ZFYVE9	ENST00000287727.3	1.26625	1310	1139	1138	-3139	-3140	-3603	171	4277	463
chr1	52704240	ZFYVE9	ENST00000287727.3	1.26905	1322	1151	1150	-3127	-3128	-3591	171	4277	463
chr1	52704303	ZFYVE9	ENST00000287727.3	1.28378	1385	1214	1213	-3064	-3065	-3528	171	4277	463
chr1	52704337	ZFYVE9	ENST00000287727.3	1.29173	1419	1248	1247	-3030	-3031	-3494	171	4277	463
chr1	52838859	ORC1	ENST00000371566.1	1.99768	2723	2580	2579	-6	-7	-356	143	2585	349
chr1	52849203	ORC1	ENST00000371566.1	1.7355	2045	1902	1901	-684	-685	-1034	143	2585	349
chr1	52859193	ORC1	ENST00000371566.1	1.38824	1147	1004	1003	-1582	-1583	-1932	143	2585	349
chr1	52859257	ORC1	ENST00000371566.1	1.3635	1083	940	939	-1646	-1647	-1996	143	2585	349
chr1	52859347	ORC1	ENST00000371566.1	1.32869	993	850	849	-1736	-1737	-2086	143	2585	349
chr1	52859350	ORC1	ENST00000371566.1	1.32753	990	847	846	-1739	-1740	-2089	143	2585	349
chr1	52862002	ORC1	ENST00000371566.1	1.16899	580	437	436	-2149	-2150	-2499	143	2585	349
chr1	52863396	ORC1	ENST00000371566.1	1.14037	506	363	362	-2223	-2224	-2573	143	2585	349
chr1	52870501	PRPF38A	ENST00000257181.9	1.0852	265	80	79	-859	-860	-5008	185	938	4148
chr1	52871420	PRPF38A	ENST00000257181.9	1.21193	384	199	198	-740	-741	-4889	185	938	4148
chr1	52871421	PRPF38A	ENST00000257181.9	1.21299	385	200	199	-739	-740	-4888	185	938	4148
chr1	52871424	PRPF38A	ENST00000257181.9	1.21619	388	203	202	-736	-737	-4885	185	938	4148
chr1	52871432	PRPF38A	ENST00000257181.9	1.22471	396	211	210	-728	-729	-4877	185	938	4148
chr1	52874301	PRPF38A	ENST00000257181.9	1.3738	536	351	350	-588	-589	-4737	185	938	4148
chr1	52874322	PRPF38A	ENST00000257181.9	1.39617	557	372	371	-567	-568	-4716	185	938	4148
chr1	52874328	PRPF38A	ENST00000257181.9	1.40256	563	378	377	-561	-562	-4710	185	938	4148
chr1	52896732	ZCCHC11	ENST00000257177.4	1.94451	4808	4664	4663	-274	-275	-934	144	4937	659
chr1	52940891	ZCCHC11	ENST00000257177.4	1.47388	2484	2340	2339	-2598	-2599	-3258	144	4937	659
chr1	52940894	ZCCHC11	ENST00000257177.4	1.47327	2481	2337	2336	-2601	-2602	-3261	144	4937	659
chr1	52941152	ZCCHC11	ENST00000257177.4	1.42102	2223	2079	2078	-2859	-2860	-3519	144	4937	659
chr1	52943443	ZCCHC11	ENST00000257177.4	1.39692	2104	1960	1959	-2978	-2979	-3638	144	4937	659
chr1	52981674	ZCCHC11	ENST00000257177.4	1.15614	915	771	770	-4167	-4168	-4827	144	4937	659
chr1	52991436	ZCCHC11	ENST00000257177.4	1.1047	661	517	516	-4421	-4422	-5081	144	4937	659
chr1	52991443	ZCCHC11	ENST00000257177.4	1.10328	654	510	509	-4428	-4429	-5088	144	4937	659
chr1	52991454	ZCCHC11	ENST00000257177.4	1.10105	643	499	498	-4439	-4440	-5099	144	4937	659
chr1	52991859	ZCCHC11	ENST00000257177.4	1.01904	238	94	93	-4844	-4845	-5504	144	4937	659
chr1	52991913	ZCCHC11	ENST00000257177.4	1.0081	184	40	39	-4898	-4899	-5558	144	4937	659
chr1	52991919	ZCCHC11	ENST00000257177.4	1.00689	178	34	33	-4904	-4905	-5564	144	4937	659
chr1	53153402	SELRC1	ENST00000371538.3	1.98563	725	686	685	-10	-11	-894	39	695	883
chr1	53153434	SELRC1	ENST00000371538.3	1.93966	693	654	653	-42	-43	-926	39	695	883
chr1	53153436	SELRC1	ENST00000371538.3	1.93678	691	652	651	-44	-45	-928	39	695	883
chr1	53153506	SELRC1	ENST00000371538.3	1.83621	621	582	581	-114	-115	-998	39	695	883
chr1	53153566	SELRC1	ENST00000371538.3	1.75	561	522	521	-174	-175	-1058	39	695	883
chr1	53153674	SELRC1	ENST00000371538.3	1.59483	453	414	413	-282	-283	-1166	39	695	883
chr1	53153698	SELRC1	ENST00000371538.3	1.56034	429	390	389	-306	-307	-1190	39	695	883
chr1	53158407	SELRC1	ENST00000371538.3	1.34339	278	239	238	-457	-458	-1341	39	695	883
chr1	53236789	ZYG11B	ENST00000294353.6	1.13154	438	294	293	-1941	-1942	-7654	144	2234	5712
chr1	53237270	ZYG11B	ENST00000294353.6	1.34676	919	775	774	-1460	-1461	-7173	144	2234	5712
chr1	53416514	SCP2	ENST00000371514.3	1.17457	454	287	286	-1357	-1358	-2356	167	1643	998
chr1	53516338	SCP2	ENST00000371514.3	1.97689	1773	1606	1605	-38	-39	-1037	167	1643	998
chr1	53516373	SCP2	ENST00000371514.3	1.99818	1808	1641	1640	-3	-4	-1002	167	1643	998
chr1	53675757	CPT2	ENST00000371486.3	1.20789	925	411	410	-1566	-1567	-2168	514	1976	601
chr1	53675840	CPT2	ENST00000371486.3	1.24987	1008	494	493	-1483	-1484	-2085	514	1976	601
chr1	53676001	CPT2	ENST00000371486.3	1.33131	1169	655	654	-1322	-1323	-1924	514	1976	601
chr1	53676009	CPT2	ENST00000371486.3	1.33536	1177	663	662	-1314	-1315	-1916	514	1976	601
chr1	53676012	CPT2	ENST00000371486.3	1.33687	1180	666	665	-1311	-1312	-1913	514	1976	601
chr1	53676017	CPT2	ENST00000371486.3	1.3394	1185	671	670	-1306	-1307	-1908	514	1976	601
chr1	53676037	CPT2	ENST00000371486.3	1.34952	1205	691	690	-1286	-1287	-1888	514	1976	601
chr1	53676051	CPT2	ENST00000371486.3	1.3566	1219	705	704	-1272	-1273	-1874	514	1976	601
chr1	53676053	CPT2	ENST00000371486.3	1.35761	1221	707	706	-1270	-1271	-1872	514	1976	601
chr1	53676060	CPT2	ENST00000371486.3	1.36115	1228	714	713	-1263	-1264	-1865	514	1976	601
chr1	53676070	CPT2	ENST00000371486.3	1.36621	1238	724	723	-1253	-1254	-1855	514	1976	601
chr1	53676072	CPT2	ENST00000371486.3	1.36722	1240	726	725	-1251	-1252	-1853	514	1976	601
chr1	53676333	CPT2	ENST00000371486.3	1.49924	1501	987	986	-990	-991	-1592	514	1976	601
chr1	53676357	CPT2	ENST00000371486.3	1.51138	1525	1011	1010	-966	-967	-1568	514	1976	601
chr1	53676366	CPT2	ENST00000371486.3	1.51593	1534	1020	1019	-957	-958	-1559	514	1976	601
chr1	53676389	CPT2	ENST00000371486.3	1.52757	1557	1043	1042	-934	-935	-1536	514	1976	601
chr1	53676443	CPT2	ENST00000371486.3	1.55488	1611	1097	1096	-880	-881	-1482	514	1976	601
chr1	53676516	CPT2	ENST00000371486.3	1.59181	1684	1170	1169	-807	-808	-1409	514	1976	601
chr1	53676527	CPT2	ENST00000371486.3	1.59737	1695	1181	1180	-796	-797	-1398	514	1976	601
chr1	53676560	CPT2	ENST00000371486.3	1.61406	1728	1214	1213	-763	-764	-1365	514	1976	601
chr1	53676572	CPT2	ENST00000371486.3	1.62013	1740	1226	1225	-751	-752	-1353	514	1976	601
chr1	53676578	CPT2	ENST00000371486.3	1.62317	1746	1232	1231	-745	-746	-1347	514	1976	601
chr1	53676605	CPT2	ENST00000371486.3	1.63682	1773	1259	1258	-718	-719	-1320	514	1976	601
chr1	53676620	CPT2	ENST00000371486.3	1.64441	1788	1274	1273	-703	-704	-1305	514	1976	601
chr1	53676678	CPT2	ENST00000371486.3	1.67375	1846	1332	1331	-645	-646	-1247	514	1976	601
chr1	53676684	CPT2	ENST00000371486.3	1.67678	1852	1338	1337	-639	-640	-1241	514	1976	601
chr1	53692738	MAGOH	ENST00000371466.4	1.93636	359	309	308	-21	-22	-140	50	329	118
chr1	54238009	NDC1	ENST00000371429.3	1.96494	2552	1954	1953	-71	-72	-2581	598	2024	2509
chr1	54238026	NDC1	ENST00000371429.3	1.95654	2535	1937	1936	-88	-89	-2598	598	2024	2509
chr1	54238148	NDC1	ENST00000371429.3	1.8963	2413	1815	1814	-210	-211	-2720	598	2024	2509
chr1	54266422	NDC1	ENST00000371429.3	1.5758	1764	1166	1165	-859	-860	-3369	598	2024	2509
chr1	54273443	NDC1	ENST00000371429.3	1.3837	1375	777	776	-1248	-1249	-3758	598	2024	2509
chr1	54284666	NDC1	ENST00000371429.3	1.3363	1279	681	680	-1344	-1345	-3854	598	2024	2509
chr1	54284702	NDC1	ENST00000371429.3	1.31852	1243	645	644	-1380	-1381	-3890	598	2024	2509
chr1	54291550	NDC1	ENST00000371429.3	1.25432	1113	515	514	-1510	-1511	-4020	598	2024	2509
chr1	54293776	NDC1	ENST00000371429.3	1.17333	949	351	350	-1674	-1675	-4184	598	2024	2509
chr1	54293820	NDC1	ENST00000371429.3	1.1516	905	307	306	-1718	-1719	-4228	598	2024	2509
chr1	54332484	YIPF1	ENST00000072644.1	1.64604	931	595	594	-326	-327	-871	336	920	544
chr1	54332544	YIPF1	ENST00000072644.1	1.58089	871	535	534	-386	-387	-931	336	920	544
chr1	54382591	HSPB11	ENST00000371378.2	1.80155	549	517	516	-128	-129	-344	32	644	215
chr1	54417813	LRRC42	ENST00000319223.4	1.10956	351	141	140	-1146	-1147	-1375	210	1286	228
chr1	54417855	LRRC42	ENST00000319223.4	1.14219	393	183	182	-1104	-1105	-1333	210	1286	228
chr1	54497887	TMEM59	ENST00000234831.5	1.93416	1157	908	907	-64	-65	-538	249	971	473
chr1	54513031	TMEM59	ENST00000234831.5	1.20988	453	204	203	-768	-769	-1242	249	971	473
chr1	54640356	CYB5RL	ENST00000401046.3	1.87302	817	440	439	-64	-65	-2325	377	503	2260
chr1	54666213	MRPL37	ENST00000336230.6	1.23436	321	206	205	-673	-674	-800	115	878	126
chr1	54675667	MRPL37	ENST00000336230.6	1.34357	417	302	301	-577	-578	-704	115	878	126
chr1	54675753	MRPL37	ENST00000336230.6	1.44141	503	388	387	-491	-492	-618	115	878	126
chr1	54675761	MRPL37	ENST00000336230.6	1.45051	511	396	395	-483	-484	-610	115	878	126
chr1	54675765	MRPL37	ENST00000336230.6	1.45506	515	400	399	-479	-480	-606	115	878	126
chr1	54678221	MRPL37	ENST00000336230.6	1.55404	602	487	486	-392	-393	-519	115	878	126
chr1	54678239	MRPL37	ENST00000336230.6	1.57452	620	505	504	-374	-375	-501	115	878	126
chr1	54681895	MRPL37	ENST00000336230.6	1.77247	794	679	678	-200	-201	-327	115	878	126
chr1	54681898	MRPL37	ENST00000336230.6	1.77588	797	682	681	-197	-198	-324	115	878	126
chr1	54681905	MRPL37	ENST00000336230.6	1.78385	804	689	688	-190	-191	-317	115	878	126
chr1	54683879	MRPL37	ENST00000336230.6	1.95108	951	836	835	-43	-44	-170	115	878	126
chr1	54683883	MRPL37	ENST00000336230.6	1.95563	955	840	839	-39	-40	-166	115	878	126
chr1	55183217	TTC4	ENST00000371281.3	1.24227	368	282	281	-882	-883	-2026	86	1163	1143
chr1	55183217	MROH7-TTC4	ENST00000414150.2	1.996	4266	3989	3988	-16	-17	-1600	277	4004	1583
chr1	55207174	TTC4	ENST00000371281.3	1.98969	1238	1152	1151	-12	-13	-1156	86	1163	1143
chr1	55223410	PARS2	ENST00000371279.3	1.9979	1507	1425	1424	-3	-4	-839	82	1427	835
chr1	55223430	PARS2	ENST00000371279.3	1.98389	1487	1405	1404	-23	-24	-859	82	1427	835
chr1	55223462	PARS2	ENST00000371279.3	1.96148	1455	1373	1372	-55	-56	-891	82	1427	835
chr1	55223474	PARS2	ENST00000371279.3	1.95308	1443	1361	1360	-67	-68	-903	82	1427	835
chr1	55223499	PARS2	ENST00000371279.3	1.93557	1418	1336	1335	-92	-93	-928	82	1427	835
chr1	55223530	PARS2	ENST00000371279.3	1.91387	1387	1305	1304	-123	-124	-959	82	1427	835
chr1	55223575	PARS2	ENST00000371279.3	1.88235	1342	1260	1259	-168	-169	-1004	82	1427	835
chr1	55223585	PARS2	ENST00000371279.3	1.87535	1332	1250	1249	-178	-179	-1014	82	1427	835
chr1	55223599	PARS2	ENST00000371279.3	1.86555	1318	1236	1235	-192	-193	-1028	82	1427	835
chr1	55223602	PARS2	ENST00000371279.3	1.86345	1315	1233	1232	-195	-196	-1031	82	1427	835
chr1	55223622	PARS2	ENST00000371279.3	1.84944	1295	1213	1212	-215	-216	-1051	82	1427	835
chr1	55223647	PARS2	ENST00000371279.3	1.83193	1270	1188	1187	-240	-241	-1076	82	1427	835
chr1	55223650	PARS2	ENST00000371279.3	1.82983	1267	1185	1184	-243	-244	-1079	82	1427	835
chr1	55223653	PARS2	ENST00000371279.3	1.82773	1264	1182	1181	-246	-247	-1082	82	1427	835
chr1	55223736	PARS2	ENST00000371279.3	1.76961	1181	1099	1098	-329	-330	-1165	82	1427	835
chr1	55223765	PARS2	ENST00000371279.3	1.7493	1152	1070	1069	-358	-359	-1194	82	1427	835
chr1	55223801	PARS2	ENST00000371279.3	1.72409	1116	1034	1033	-394	-395	-1230	82	1427	835
chr1	55223858	PARS2	ENST00000371279.3	1.68417	1059	977	976	-451	-452	-1287	82	1427	835
chr1	55223872	PARS2	ENST00000371279.3	1.67437	1045	963	962	-465	-466	-1301	82	1427	835
chr1	55223906	PARS2	ENST00000371279.3	1.65056	1011	929	928	-499	-500	-1335	82	1427	835
chr1	55223908	PARS2	ENST00000371279.3	1.64916	1009	927	926	-501	-502	-1337	82	1427	835
chr1	55223930	PARS2	ENST00000371279.3	1.63375	987	905	904	-523	-524	-1359	82	1427	835
chr1	55223970	PARS2	ENST00000371279.3	1.60574	947	865	864	-563	-564	-1399	82	1427	835
chr1	55223972	PARS2	ENST00000371279.3	1.60434	945	863	862	-565	-566	-1401	82	1427	835
chr1	55223982	PARS2	ENST00000371279.3	1.59734	935	853	852	-575	-576	-1411	82	1427	835
chr1	55223984	PARS2	ENST00000371279.3	1.59594	933	851	850	-577	-578	-1413	82	1427	835
chr1	55224027	PARS2	ENST00000371279.3	1.56583	890	808	807	-620	-621	-1456	82	1427	835
chr1	55224133	PARS2	ENST00000371279.3	1.4916	784	702	701	-726	-727	-1562	82	1427	835
chr1	55224203	PARS2	ENST00000371279.3	1.44258	714	632	631	-796	-797	-1632	82	1427	835
chr1	55224205	PARS2	ENST00000371279.3	1.44118	712	630	629	-798	-799	-1634	82	1427	835
chr1	55224220	PARS2	ENST00000371279.3	1.43067	697	615	614	-813	-814	-1649	82	1427	835
chr1	55224281	PARS2	ENST00000371279.3	1.38796	636	554	553	-874	-875	-1710	82	1427	835
chr1	55224289	PARS2	ENST00000371279.3	1.38235	628	546	545	-882	-883	-1718	82	1427	835
chr1	55224347	PARS2	ENST00000371279.3	1.34174	570	488	487	-940	-941	-1776	82	1427	835
chr1	55224361	PARS2	ENST00000371279.3	1.33193	556	474	473	-954	-955	-1790	82	1427	835
chr1	55224363	PARS2	ENST00000371279.3	1.33053	554	472	471	-956	-957	-1792	82	1427	835
chr1	55224365	PARS2	ENST00000371279.3	1.32913	552	470	469	-958	-959	-1794	82	1427	835
chr1	55224379	PARS2	ENST00000371279.3	1.31933	538	456	455	-972	-973	-1808	82	1427	835
chr1	55224481	PARS2	ENST00000371279.3	1.2479	436	354	353	-1074	-1075	-1910	82	1427	835
chr1	55224517	PARS2	ENST00000371279.3	1.22269	400	318	317	-1110	-1111	-1946	82	1427	835
chr1	55317909	DHCR24	ENST00000371269.3	1.99807	1646	1548	1547	-3	-4	-2603	98	1550	2599
chr1	55317933	DHCR24	ENST00000371269.3	1.98259	1622	1524	1523	-27	-28	-2627	98	1550	2599
chr1	55318026	DHCR24	ENST00000371269.3	1.92263	1529	1431	1430	-120	-121	-2720	98	1550	2599
chr1	55319196	DHCR24	ENST00000371269.3	1.84333	1406	1308	1307	-243	-244	-2843	98	1550	2599
chr1	55331001	DHCR24	ENST00000371269.3	1.64152	1093	995	994	-556	-557	-3156	98	1550	2599
chr1	57002679	PPAP2B	ENST00000371250.3	1.26175	796	245	244	-691	-692	-2495	551	935	1803
chr1	57140176	PRKAA2	ENST00000371244.4	1.1308	282	217	216	-1442	-1443	-9064	65	1658	7621
chr1	57169846	PRKAA2	ENST00000371244.4	1.59735	1056	991	990	-668	-669	-8290	65	1658	7621
chr1	57169904	PRKAA2	ENST00000371244.4	1.63231	1114	1049	1048	-610	-611	-8232	65	1658	7621
chr1	57169948	PRKAA2	ENST00000371244.4	1.65883	1158	1093	1092	-566	-567	-8188	65	1658	7621
chr1	57170014	PRKAA2	ENST00000371244.4	1.69861	1224	1159	1158	-500	-501	-8122	65	1658	7621
chr1	57170024	PRKAA2	ENST00000371244.4	1.70464	1234	1169	1168	-490	-491	-8112	65	1658	7621
chr1	57173318	PRKAA2	ENST00000371244.4	1.95901	1656	1591	1590	-68	-69	-7690	65	1658	7621
chr1	58946736	OMA1	ENST00000371226.3	1.93714	1589	1476	1475	-99	-100	-345	113	1574	245
chr1	59002377	OMA1	ENST00000371226.3	1.34095	650	537	536	-1038	-1039	-1284	113	1574	245
chr1	59004903	OMA1	ENST00000371226.3	1.04063	177	64	63	-1511	-1512	-1757	113	1574	245
chr1	59147830	MYSM1	ENST00000472487.1	1.35625	925	886	885	-1601	-1602	-6859	39	2486	5257
chr1	59147832	MYSM1	ENST00000472487.1	1.35545	923	884	883	-1603	-1604	-6861	39	2486	5257
chr1	59147851	MYSM1	ENST00000472487.1	1.34781	904	865	864	-1622	-1623	-6880	39	2486	5257
chr1	59148044	MYSM1	ENST00000472487.1	1.27021	711	672	671	-1815	-1816	-7073	39	2486	5257
chr1	60312824	HOOK1	ENST00000371208.3	1.40969	1152	896	895	-1291	-1292	-4704	256	2186	3412
chr1	60314098	HOOK1	ENST00000371208.3	1.47599	1297	1041	1040	-1146	-1147	-4559	256	2186	3412
chr1	60314118	HOOK1	ENST00000371208.3	1.48514	1317	1061	1060	-1126	-1127	-4539	256	2186	3412
chr1	60314163	HOOK1	ENST00000371208.3	1.50572	1362	1106	1105	-1081	-1082	-4494	256	2186	3412
chr1	60325930	HOOK1	ENST00000371208.3	1.6685	1718	1462	1461	-725	-726	-4138	256	2186	3412
chr1	60370555	CYP2J2	ENST00000371204.3	1.78131	1222	1179	1178	-330	-331	-673	43	1508	342
chr1	60370597	CYP2J2	ENST00000371204.3	1.75348	1180	1137	1136	-372	-373	-715	43	1508	342
chr1	60377304	CYP2J2	ENST00000371204.3	1.43738	703	660	659	-849	-850	-1192	43	1508	342
chr1	60392293	CYP2J2	ENST00000371204.3	1.0835	169	126	125	-1383	-1384	-1726	43	1508	342
chr1	60392316	CYP2J2	ENST00000371204.3	1.06826	146	103	102	-1406	-1407	-1749	43	1508	342
chr1	61553913	NFIA	ENST00000371184.2	1.10499	157	120	119	-1023	-1024	-1190	37	1142	166
chr1	61554106	NFIA	ENST00000371184.2	1.27384	350	313	312	-830	-831	-997	37	1142	166
chr1	61554263	NFIA	ENST00000371184.2	1.4112	507	470	469	-673	-674	-840	37	1142	166
chr1	61554305	NFIA	ENST00000371184.2	1.44794	549	512	511	-631	-632	-798	37	1142	166
chr1	61554316	NFIA	ENST00000371184.2	1.45757	560	523	522	-620	-621	-787	37	1142	166
chr1	61554318	NFIA	ENST00000371184.2	1.45932	562	525	524	-618	-619	-785	37	1142	166
chr1	61554336	NFIA	ENST00000371184.2	1.47507	580	543	542	-600	-601	-767	37	1142	166
chr1	61869846	NFIA	ENST00000371184.2	1.66404	796	759	758	-384	-385	-551	37	1142	166
chr1	62160424	TM2D1	ENST00000294613.5	1.73397	760	458	457	-166	-167	-489	302	623	322
chr1	62175053	TM2D1	ENST00000294613.5	1.47276	597	295	294	-329	-330	-652	302	623	322
chr1	62175082	TM2D1	ENST00000294613.5	1.42628	568	266	265	-358	-359	-681	302	623	322
chr1	62190630	TM2D1	ENST00000294613.5	1.26122	465	163	162	-461	-462	-784	302	623	322
chr1	62905609	USP1	ENST00000339950.4	1.03011	885	71	70	-2287	-2288	-3110	814	2357	822
chr1	62905663	USP1	ENST00000339950.4	1.05301	939	125	124	-2233	-2234	-3056	814	2357	822
chr1	62907262	USP1	ENST00000339950.4	1.1162	1088	274	273	-2084	-2085	-2907	814	2357	822
chr1	62907939	USP1	ENST00000339950.4	1.15479	1179	365	364	-1993	-1994	-2816	814	2357	822
chr1	62908982	USP1	ENST00000339950.4	1.23282	1363	549	548	-1809	-1810	-2632	814	2357	822
chr1	62910443	USP1	ENST00000339950.4	1.25106	1406	592	591	-1766	-1767	-2589	814	2357	822
chr1	62910628	USP1	ENST00000339950.4	1.32952	1591	777	776	-1581	-1582	-2404	814	2357	822
chr1	62910746	USP1	ENST00000339950.4	1.37956	1709	895	894	-1463	-1464	-2286	814	2357	822
chr1	62910750	USP1	ENST00000339950.4	1.38126	1713	899	898	-1459	-1460	-2282	814	2357	822
chr1	62910888	USP1	ENST00000339950.4	1.43978	1851	1037	1036	-1321	-1322	-2144	814	2357	822
chr1	62910905	USP1	ENST00000339950.4	1.44699	1868	1054	1053	-1304	-1305	-2127	814	2357	822
chr1	62910936	USP1	ENST00000339950.4	1.46014	1899	1085	1084	-1273	-1274	-2096	814	2357	822
chr1	62910939	USP1	ENST00000339950.4	1.46141	1902	1088	1087	-1270	-1271	-2093	814	2357	822
chr1	62911046	USP1	ENST00000339950.4	1.50679	2009	1195	1194	-1163	-1164	-1986	814	2357	822
chr1	62911062	USP1	ENST00000339950.4	1.51357	2025	1211	1210	-1147	-1148	-1970	814	2357	822
chr1	62914186	USP1	ENST00000339950.4	1.62383	2285	1471	1470	-887	-888	-1710	814	2357	822
chr1	62916100	USP1	ENST00000339950.4	1.7659	2620	1806	1805	-552	-553	-1375	814	2357	822
chr1	62916228	USP1	ENST00000339950.4	1.82019	2748	1934	1933	-424	-425	-1247	814	2357	822
chr1	62916396	USP1	ENST00000339950.4	1.89143	2916	2102	2101	-256	-257	-1079	814	2357	822
chr1	62916606	USP1	ENST00000339950.4	1.98049	3126	2312	2311	-46	-47	-869	814	2357	822
chr1	62916623	USP1	ENST00000339950.4	1.9877	3143	2329	2328	-29	-30	-852	814	2357	822
chr1	63119746	DOCK7	ENST00000251157.5	1.03584	262	229	228	-6161	-6162	-6847	33	6389	685
chr1	63282334	ATG4C	ENST00000317868.4	1.18083	455	249	248	-1128	-1129	-2482	206	1376	1353
chr1	63284737	ATG4C	ENST00000317868.4	1.33115	662	456	455	-921	-922	-2275	206	1376	1353
chr1	63307174	ATG4C	ENST00000317868.4	1.84604	1371	1165	1164	-212	-213	-1566	206	1376	1353
chr1	63307195	ATG4C	ENST00000317868.4	1.86129	1392	1186	1185	-191	-192	-1545	206	1376	1353
chr1	63329728	ATG4C	ENST00000317868.4	1.92593	1481	1275	1274	-102	-103	-1456	206	1376	1353
chr1	63329739	ATG4C	ENST00000317868.4	1.93391	1492	1286	1285	-91	-92	-1445	206	1376	1353
chr1	63329751	ATG4C	ENST00000317868.4	1.94263	1504	1298	1297	-79	-80	-1433	206	1376	1353
chr1	63329772	ATG4C	ENST00000317868.4	1.95788	1525	1319	1318	-58	-59	-1412	206	1376	1353
chr1	63862264	ALG6	ENST00000263440.4	1.10654	370	163	162	-1367	-1368	-1524	207	1529	156
chr1	63876867	ALG6	ENST00000263440.4	1.36013	758	551	550	-979	-980	-1136	207	1529	156
chr1	63876874	ALG6	ENST00000263440.4	1.36471	765	558	557	-972	-973	-1129	207	1529	156
chr1	63876923	ALG6	ENST00000263440.4	1.39673	814	607	606	-923	-924	-1080	207	1529	156
chr1	63876937	ALG6	ENST00000263440.4	1.40588	828	621	620	-909	-910	-1066	207	1529	156
chr1	63877679	ALG6	ENST00000263440.4	1.50261	976	769	768	-761	-762	-918	207	1529	156
chr1	63877718	ALG6	ENST00000263440.4	1.5281	1015	808	807	-722	-723	-879	207	1529	156
chr1	63879771	ALG6	ENST00000263440.4	1.5634	1069	862	861	-668	-669	-825	207	1529	156
chr1	63879800	ALG6	ENST00000263440.4	1.58235	1098	891	890	-639	-640	-796	207	1529	156
chr1	63894774	ALG6	ENST00000263440.4	1.85556	1516	1309	1308	-221	-222	-378	207	1529	156
chr1	63894789	ALG6	ENST00000263440.4	1.86536	1531	1324	1323	-206	-207	-363	207	1529	156
chr1	63902545	ALG6	ENST00000263440.4	1.90458	1591	1384	1383	-146	-147	-303	207	1529	156
chr1	63955820	ITGB3BP	ENST00000271002.10	1.22097	199	118	117	-416	-417	-748	81	533	331
chr1	63991290	EFCAB7	ENST00000371088.4	1.02487	292	47	46	-1843	-1844	-2020	245	1889	176
chr1	63991381	EFCAB7	ENST00000371088.4	1.07302	383	138	137	-1752	-1753	-1929	245	1889	176
chr1	63997625	EFCAB7	ENST00000371088.4	1.17037	567	322	321	-1568	-1569	-1745	245	1889	176
chr1	63997681	EFCAB7	ENST00000371088.4	1.2	623	378	377	-1512	-1513	-1689	245	1889	176
chr1	63999151	EFCAB7	ENST00000371088.4	1.27143	758	513	512	-1377	-1378	-1554	245	1889	176
chr1	63999171	EFCAB7	ENST00000371088.4	1.28201	778	533	532	-1357	-1358	-1534	245	1889	176
chr1	63999294	EFCAB7	ENST00000371088.4	1.34709	901	656	655	-1234	-1235	-1411	245	1889	176
chr1	64017470	EFCAB7	ENST00000371088.4	1.54021	1266	1021	1020	-869	-870	-1046	245	1889	176
chr1	64017491	EFCAB7	ENST00000371088.4	1.55132	1287	1042	1041	-848	-849	-1025	245	1889	176
chr1	64034087	EFCAB7	ENST00000371088.4	1.84868	1849	1604	1603	-286	-287	-463	245	1889	176
chr1	64059357	PGM1	ENST00000371084.3	1.11723	410	198	197	-1491	-1492	-2061	212	1688	569
chr1	64095203	PGM1	ENST00000371084.3	1.20959	566	354	353	-1335	-1336	-1905	212	1688	569
chr1	64095661	PGM1	ENST00000371084.3	1.27117	670	458	457	-1231	-1232	-1801	212	1688	569
chr1	64097402	PGM1	ENST00000371084.3	1.37359	843	631	630	-1058	-1059	-1628	212	1688	569
chr1	64097423	PGM1	ENST00000371084.3	1.38603	864	652	651	-1037	-1038	-1607	212	1688	569
chr1	64100557	PGM1	ENST00000371084.3	1.43813	952	740	739	-949	-950	-1519	212	1688	569
chr1	64117448	PGM1	ENST00000371084.3	1.82238	1601	1389	1388	-300	-301	-870	212	1688	569
chr1	64125305	PGM1	ENST00000371084.3	1.97573	1860	1648	1647	-41	-42	-611	212	1688	569
chr1	65157069	CACHD1	ENST00000290039.5	1.95234	3602	3497	3496	-175	-176	-1672	105	3671	1496
chr1	65157140	CACHD1	ENST00000290039.5	1.97168	3673	3568	3567	-104	-105	-1601	105	3671	1496
chr1	65157148	CACHD1	ENST00000290039.5	1.97386	3681	3576	3575	-96	-97	-1593	105	3671	1496
chr1	65157172	CACHD1	ENST00000290039.5	1.98039	3705	3600	3599	-72	-73	-1569	105	3671	1496
chr1	65332612	JAK1	ENST00000342505.4	1.26753	1175	927	926	-2538	-2539	-3871	248	3464	1332
chr1	65332621	JAK1	ENST00000342505.4	1.26494	1166	918	917	-2547	-2548	-3880	248	3464	1332
chr1	65332665	JAK1	ENST00000342505.4	1.25224	1122	874	873	-2591	-2592	-3924	248	3464	1332
chr1	65332696	JAK1	ENST00000342505.4	1.24329	1091	843	842	-2622	-2623	-3955	248	3464	1332
chr1	65332706	JAK1	ENST00000342505.4	1.2404	1081	833	832	-2632	-2633	-3965	248	3464	1332
chr1	65332724	JAK1	ENST00000342505.4	1.23521	1063	815	814	-2650	-2651	-3983	248	3464	1332
chr1	65332834	JAK1	ENST00000342505.4	1.20346	953	705	704	-2760	-2761	-4093	248	3464	1332
chr1	65335059	JAK1	ENST00000342505.4	1.16797	830	582	581	-2883	-2884	-4216	248	3464	1332
chr1	65830367	DNAJC6	ENST00000263441.7	1.01221	354	33	32	-2670	-2671	-2932	321	2702	261
chr1	65830424	DNAJC6	ENST00000263441.7	1.0333	411	90	89	-2613	-2614	-2875	321	2702	261
chr1	65830436	DNAJC6	ENST00000263441.7	1.03774	423	102	101	-2601	-2602	-2863	321	2702	261
chr1	65895668	LEPROT	ENST00000371065.4	1.54545	353	216	215	-180	-181	-4268	137	395	4087
chr1	66036250	LEPR	ENST00000349533.6	1.03859	319	135	134	-3363	-3364	-7907	184	3497	4543
chr1	66081827	LEPR	ENST00000349533.6	1.60949	2316	2132	2131	-1366	-1367	-5910	184	3497	4543
chr1	66083716	LEPR	ENST00000349533.6	1.65237	2466	2282	2281	-1216	-1217	-5760	184	3497	4543
chr1	67423766	MIER1	ENST00000355356.3	1.1332	353	205	204	-1334	-1335	-4464	148	1538	3129
chr1	67423876	MIER1	ENST00000355356.3	1.20468	463	315	314	-1224	-1225	-4354	148	1538	3129
chr1	67424574	MIER1	ENST00000355356.3	1.24886	531	383	382	-1156	-1157	-4286	148	1538	3129
chr1	67424576	MIER1	ENST00000355356.3	1.25016	533	385	384	-1154	-1155	-4284	148	1538	3129
chr1	67424604	MIER1	ENST00000355356.3	1.26836	561	413	412	-1126	-1127	-4256	148	1538	3129
chr1	67424645	MIER1	ENST00000355356.3	1.295	602	454	453	-1085	-1086	-4215	148	1538	3129
chr1	67436633	MIER1	ENST00000355356.3	1.49123	904	756	755	-783	-784	-3913	148	1538	3129
chr1	67442363	MIER1	ENST00000355356.3	1.66797	1176	1028	1027	-511	-512	-3641	148	1538	3129
chr1	67442365	MIER1	ENST00000355356.3	1.66927	1178	1030	1029	-509	-510	-3639	148	1538	3129
chr1	67450317	MIER1	ENST00000355356.3	1.82716	1421	1273	1272	-266	-267	-3396	148	1538	3129
chr1	67450387	MIER1	ENST00000355356.3	1.87264	1491	1343	1342	-196	-197	-3326	148	1538	3129
chr1	67450399	MIER1	ENST00000355356.3	1.88044	1503	1355	1354	-184	-185	-3314	148	1538	3129
chr1	67450402	MIER1	ENST00000355356.3	1.88239	1506	1358	1357	-181	-182	-3311	148	1538	3129
chr1	67450406	MIER1	ENST00000355356.3	1.88499	1510	1362	1361	-177	-178	-3307	148	1538	3129
chr1	67880902	SERBP1	ENST00000370994.4	1.9055	1168	1054	1053	-110	-111	-5507	114	1163	5396
chr1	68153415	GADD45A	ENST00000370985.3	1.89394	647	354	353	-42	-43	-155	293	395	112
chr1	68173343	GNG12	ENST00000370982.3	1.12329	226	27	26	-192	-193	-4177	199	218	3984
chr1	68173356	GNG12	ENST00000370982.3	1.06393	213	14	13	-205	-206	-4190	199	218	3984
chr1	68603473	WLS	ENST00000354777.2	1.91912	1745	1500	1499	-132	-133	-291	245	1631	158
chr1	68603569	WLS	ENST00000354777.2	1.86029	1649	1404	1403	-228	-229	-387	245	1631	158
chr1	68611617	WLS	ENST00000354777.2	1.73958	1452	1207	1206	-425	-426	-584	245	1631	158
chr1	68611654	WLS	ENST00000354777.2	1.71691	1415	1170	1169	-462	-463	-621	245	1631	158
chr1	68614257	WLS	ENST00000354777.2	1.64522	1298	1053	1052	-579	-580	-738	245	1631	158
chr1	68615877	WLS	ENST00000354777.2	1.58824	1205	960	959	-672	-673	-831	245	1631	158
chr1	68615967	WLS	ENST00000354777.2	1.53309	1115	870	869	-762	-763	-921	245	1631	158
chr1	68659801	WLS	ENST00000354777.2	1.12868	455	210	209	-1422	-1423	-1581	245	1631	158
chr1	68942638	DEPDC1	ENST00000370966.5	1.98548	1782	1561	1560	-23	-24	-2803	221	1583	2779
chr1	68942658	DEPDC1	ENST00000370966.5	1.97285	1762	1541	1540	-43	-44	-2823	221	1583	2779
chr1	68942659	DEPDC1	ENST00000370966.5	1.97222	1761	1540	1539	-44	-45	-2824	221	1583	2779
chr1	68942666	DEPDC1	ENST00000370966.5	1.9678	1754	1533	1532	-51	-52	-2831	221	1583	2779
chr1	68942678	DEPDC1	ENST00000370966.5	1.96023	1742	1521	1520	-63	-64	-2843	221	1583	2779
chr1	68942689	DEPDC1	ENST00000370966.5	1.95328	1731	1510	1509	-74	-75	-2854	221	1583	2779
chr1	68942713	DEPDC1	ENST00000370966.5	1.93813	1707	1486	1485	-98	-99	-2878	221	1583	2779
chr1	68943499	DEPDC1	ENST00000370966.5	1.89457	1638	1417	1416	-167	-168	-2947	221	1583	2779
chr1	68943502	DEPDC1	ENST00000370966.5	1.89268	1635	1414	1413	-170	-171	-2950	221	1583	2779
chr1	68943512	DEPDC1	ENST00000370966.5	1.88636	1625	1404	1403	-180	-181	-2960	221	1583	2779
chr1	68943535	DEPDC1	ENST00000370966.5	1.87184	1602	1381	1380	-203	-204	-2983	221	1583	2779
chr1	68943553	DEPDC1	ENST00000370966.5	1.86048	1584	1363	1362	-221	-222	-3001	221	1583	2779
chr1	68943611	DEPDC1	ENST00000370966.5	1.82386	1526	1305	1304	-279	-280	-3059	221	1583	2779
chr1	68943615	DEPDC1	ENST00000370966.5	1.82134	1522	1301	1300	-283	-284	-3063	221	1583	2779
chr1	68944871	DEPDC1	ENST00000370966.5	1.76768	1437	1216	1215	-368	-369	-3148	221	1583	2779
chr1	68947152	DEPDC1	ENST00000370966.5	1.6654	1275	1054	1053	-530	-531	-3310	221	1583	2779
chr1	68947251	DEPDC1	ENST00000370966.5	1.6029	1176	955	954	-629	-630	-3409	221	1583	2779
chr1	68947261	DEPDC1	ENST00000370966.5	1.59659	1166	945	944	-639	-640	-3419	221	1583	2779
chr1	68949655	DEPDC1	ENST00000370966.5	1.56061	1109	888	887	-696	-697	-3476	221	1583	2779
chr1	68955146	DEPDC1	ENST00000370966.5	1.2904	681	460	459	-1124	-1125	-3904	221	1583	2779
chr1	68955166	DEPDC1	ENST00000370966.5	1.27778	661	440	439	-1144	-1145	-3924	221	1583	2779
chr1	68955173	DEPDC1	ENST00000370966.5	1.27336	654	433	432	-1151	-1152	-3931	221	1583	2779
chr1	68955180	DEPDC1	ENST00000370966.5	1.26894	647	426	425	-1158	-1159	-3938	221	1583	2779
chr1	68960124	DEPDC1	ENST00000370966.5	1.19129	524	303	302	-1281	-1282	-4061	221	1583	2779
chr1	68960293	DEPDC1	ENST00000370966.5	1.0846	355	134	133	-1450	-1451	-4230	221	1583	2779
chr1	68960319	DEPDC1	ENST00000370966.5	1.06818	329	108	107	-1476	-1477	-4256	221	1583	2779
chr1	68960324	DEPDC1	ENST00000370966.5	1.06503	324	103	102	-1481	-1482	-4261	221	1583	2779
chr1	70614175	LRRC40	ENST00000370952.3	1.93864	1777	1698	1697	-111	-112	-1106	79	1808	994
chr1	70614315	LRRC40	ENST00000370952.3	1.86125	1637	1558	1557	-251	-252	-1246	79	1808	994
chr1	70614317	LRRC40	ENST00000370952.3	1.86014	1635	1556	1555	-253	-254	-1248	79	1808	994
chr1	70650562	LRRC40	ENST00000370952.3	1.24489	522	443	442	-1366	-1367	-2361	79	1808	994
chr1	70728449	ANKRD13C	ENST00000370944.4	1.96986	1890	1577	1576	-49	-50	-2178	313	1625	2128
chr1	70728475	ANKRD13C	ENST00000370944.4	1.95387	1864	1551	1550	-75	-76	-2204	313	1625	2128
chr1	70728494	ANKRD13C	ENST00000370944.4	1.94219	1845	1532	1531	-94	-95	-2223	313	1625	2128
chr1	70740442	ANKRD13C	ENST00000370944.4	1.83333	1668	1355	1354	-271	-272	-2400	313	1625	2128
chr1	70740454	ANKRD13C	ENST00000370944.4	1.82595	1656	1343	1342	-283	-284	-2412	313	1625	2128
chr1	70758157	ANKRD13C	ENST00000370944.4	1.69434	1442	1129	1128	-497	-498	-2626	313	1625	2128
chr1	70766464	ANKRD13C	ENST00000370944.4	1.55597	1217	904	903	-722	-723	-2851	313	1625	2128
chr1	70766548	ANKRD13C	ENST00000370944.4	1.50431	1133	820	819	-806	-807	-2935	313	1625	2128
chr1	70820662	HHLA3	ENST00000359875.5	1.08116	167	28	27	-317	-318	-730	139	344	412
chr1	71544194	ZRANB2	ENST00000254821.6	1.1703	179	164	163	-799	-800	-2641	15	962	1841
chr1	74648290	LRRIQ3	ENST00000354431.4	1.26933	696	505	504	-1370	-1371	-2152	191	1874	781
chr1	74648398	LRRIQ3	ENST00000354431.4	1.21173	588	397	396	-1478	-1479	-2260	191	1874	781
chr1	74648423	LRRIQ3	ENST00000354431.4	1.1984	563	372	371	-1503	-1504	-2285	191	1874	781
chr1	74648431	LRRIQ3	ENST00000354431.4	1.19413	555	364	363	-1511	-1512	-2293	191	1874	781
chr1	74670184	FPGT	ENST00000370898.3	1.26974	519	492	491	-1332	-1333	-2734	27	1823	1401
chr1	74670283	FPGT	ENST00000370898.3	1.32401	618	591	590	-1233	-1234	-2635	27	1823	1401
chr1	74670292	FPGT	ENST00000370898.3	1.32895	627	600	599	-1224	-1225	-2626	27	1823	1401
chr1	74670297	FPGT	ENST00000370898.3	1.33169	632	605	604	-1219	-1220	-2621	27	1823	1401
chr1	74670377	FPGT	ENST00000370898.3	1.37555	712	685	684	-1139	-1140	-2541	27	1823	1401
chr1	74670502	FPGT	ENST00000370898.3	1.44408	837	810	809	-1014	-1015	-2416	27	1823	1401
chr1	74670584	FPGT	ENST00000370898.3	1.48904	919	892	891	-932	-933	-2334	27	1823	1401
chr1	74670611	FPGT	ENST00000370898.3	1.50384	946	919	918	-905	-906	-2307	27	1823	1401
chr1	74670700	FPGT	ENST00000370898.3	1.55263	1035	1008	1007	-816	-817	-2218	27	1823	1401
chr1	74670790	FPGT	ENST00000370898.3	1.60197	1125	1098	1097	-726	-727	-2128	27	1823	1401
chr1	74670813	FPGT	ENST00000370898.3	1.61458	1148	1121	1120	-703	-704	-2105	27	1823	1401
chr1	74670840	FPGT	ENST00000370898.3	1.62939	1175	1148	1147	-676	-677	-2078	27	1823	1401
chr1	74671185	FPGT	ENST00000370898.3	1.81853	1520	1493	1492	-331	-332	-1733	27	1823	1401
chr1	74671307	FPGT	ENST00000370898.3	1.88542	1642	1615	1614	-209	-210	-1611	27	1823	1401
chr1	75172005	CRYZ	ENST00000340866.5	1.97475	1052	965	964	-25	-26	-835	87	989	809
chr1	75184960	CRYZ	ENST00000340866.5	1.36465	448	361	360	-629	-630	-1439	87	989	809
chr1	75218027	TYW3	ENST00000370867.3	1.61282	566	478	477	-302	-303	-2863	88	779	2560
chr1	75229622	TYW3	ENST00000370867.3	1.77564	693	605	604	-175	-176	-2736	88	779	2560
chr1	75229626	TYW3	ENST00000370867.3	1.78077	697	609	608	-171	-172	-2732	88	779	2560
chr1	75229775	TYW3	ENST00000370867.3	1.97179	846	758	757	-22	-23	-2583	88	779	2560
chr1	75606765	LHX8	ENST00000294638.5	1.33894	1026	363	362	-708	-709	-1346	663	1070	637
chr1	76227009	ACADM	ENST00000370834.5	1.91355	1325	1247	1246	-118	-119	-846	78	1364	727
chr1	76228425	ACADM	ENST00000370834.5	1.98315	1420	1342	1341	-23	-24	-751	78	1364	727
chr1	76253271	RABGGTB	ENST00000319942.3	1.09337	163	93	92	-903	-904	-1332	70	995	428
chr1	76256980	RABGGTB	ENST00000319942.3	1.42771	496	426	425	-570	-571	-999	70	995	428
chr1	76257249	RABGGTB	ENST00000319942.3	1.5743	642	572	571	-424	-425	-853	70	995	428
chr1	76260275	RABGGTB	ENST00000319942.3	1.93976	1006	936	935	-60	-61	-489	70	995	428
chr1	76877847	ST6GALNAC3	ENST00000328299.3	1.40087	515	368	367	-550	-551	-6345	147	917	5794
chr1	76877989	ST6GALNAC3	ENST00000328299.3	1.55556	657	510	509	-408	-409	-6203	147	917	5794
chr1	76878037	ST6GALNAC3	ENST00000328299.3	1.60784	705	558	557	-360	-361	-6155	147	917	5794
chr1	77094378	ST6GALNAC3	ENST00000328299.3	1.87691	952	805	804	-113	-114	-5908	147	917	5794
chr1	77094415	ST6GALNAC3	ENST00000328299.3	1.91721	989	842	841	-76	-77	-5871	147	917	5794
chr1	77626996	PIGK	ENST00000370812.3	1.67088	820	797	796	-391	-392	-3775	23	1187	3383
chr1	77627010	PIGK	ENST00000370812.3	1.65909	806	783	782	-405	-406	-3789	23	1187	3383
chr1	77627284	PIGK	ENST00000370812.3	1.5867	720	697	696	-491	-492	-3875	23	1187	3383
chr1	77627367	PIGK	ENST00000370812.3	1.51684	637	614	613	-574	-575	-3958	23	1187	3383
chr1	78031335	ZZZ3	ENST00000370801.3	1.99631	3177	2702	2701	-10	-11	-1150	475	2711	1139
chr1	78031352	ZZZ3	ENST00000370801.3	1.99004	3160	2685	2684	-27	-28	-1167	475	2711	1139
chr1	78031378	ZZZ3	ENST00000370801.3	1.98046	3134	2659	2658	-53	-54	-1193	475	2711	1139
chr1	78031397	ZZZ3	ENST00000370801.3	1.97345	3115	2640	2639	-72	-73	-1212	475	2711	1139
chr1	78034055	ZZZ3	ENST00000370801.3	1.89528	2903	2428	2427	-284	-285	-1424	475	2711	1139
chr1	78034100	ZZZ3	ENST00000370801.3	1.87869	2858	2383	2382	-329	-330	-1469	475	2711	1139
chr1	78034115	ZZZ3	ENST00000370801.3	1.87316	2843	2368	2367	-344	-345	-1484	475	2711	1139
chr1	78041830	ZZZ3	ENST00000370801.3	1.83112	2729	2254	2253	-458	-459	-1598	475	2711	1139
chr1	78041836	ZZZ3	ENST00000370801.3	1.82891	2723	2248	2247	-464	-465	-1604	475	2711	1139
chr1	78041850	ZZZ3	ENST00000370801.3	1.82375	2709	2234	2233	-478	-479	-1618	475	2711	1139
chr1	78041866	ZZZ3	ENST00000370801.3	1.81785	2693	2218	2217	-494	-495	-1634	475	2711	1139
chr1	78045227	ZZZ3	ENST00000370801.3	1.76217	2542	2067	2066	-645	-646	-1785	475	2711	1139
chr1	78045259	ZZZ3	ENST00000370801.3	1.75037	2510	2035	2034	-677	-678	-1817	475	2711	1139
chr1	78047516	ZZZ3	ENST00000370801.3	1.68326	2328	1853	1852	-859	-860	-1999	475	2711	1139
chr1	78050300	ZZZ3	ENST00000370801.3	1.57006	2021	1546	1545	-1166	-1167	-2306	475	2711	1139
chr1	78050320	ZZZ3	ENST00000370801.3	1.56268	2001	1526	1525	-1186	-1187	-2326	475	2711	1139
chr1	78097573	ZZZ3	ENST00000370801.3	1.54093	1942	1467	1466	-1245	-1246	-2385	475	2711	1139
chr1	78097812	ZZZ3	ENST00000370801.3	1.4528	1703	1228	1227	-1484	-1485	-2624	475	2711	1139
chr1	78097843	ZZZ3	ENST00000370801.3	1.44137	1672	1197	1196	-1515	-1516	-2655	475	2711	1139
chr1	78097877	ZZZ3	ENST00000370801.3	1.42883	1638	1163	1162	-1549	-1550	-2689	475	2711	1139
chr1	78097980	ZZZ3	ENST00000370801.3	1.39086	1535	1060	1059	-1652	-1653	-2792	475	2711	1139
chr1	78098177	ZZZ3	ENST00000370801.3	1.31822	1338	863	862	-1849	-1850	-2989	475	2711	1139
chr1	78098203	ZZZ3	ENST00000370801.3	1.30863	1312	837	836	-1875	-1876	-3015	475	2711	1139
chr1	78098228	ZZZ3	ENST00000370801.3	1.29941	1287	812	811	-1900	-1901	-3040	475	2711	1139
chr1	78098658	ZZZ3	ENST00000370801.3	1.14086	857	382	381	-2330	-2331	-3470	475	2711	1139
chr1	78098862	ZZZ3	ENST00000370801.3	1.06563	653	178	177	-2534	-2535	-3674	475	2711	1139
chr1	78098904	ZZZ3	ENST00000370801.3	1.05015	611	136	135	-2576	-2577	-3716	475	2711	1139
chr1	78098989	ZZZ3	ENST00000370801.3	1.01881	526	51	50	-2661	-2662	-3801	475	2711	1139
chr1	78099002	ZZZ3	ENST00000370801.3	1.01401	513	38	37	-2674	-2675	-3814	475	2711	1139
chr1	78099011	ZZZ3	ENST00000370801.3	1.01069	504	29	28	-2683	-2684	-3823	475	2711	1139
chr1	78180328	USP33	ENST00000370793.1	1.80559	2625	2279	2278	-550	-551	-1876	346	2828	1325
chr1	78180374	USP33	ENST00000370793.1	1.78932	2579	2233	2232	-596	-597	-1922	346	2828	1325
chr1	78187522	USP33	ENST00000370793.1	1.61647	2090	1744	1743	-1085	-1086	-2411	346	2828	1325
chr1	78194023	USP33	ENST00000370793.1	1.41888	1531	1185	1184	-1644	-1645	-2970	346	2828	1325
chr1	78194029	USP33	ENST00000370793.1	1.41676	1525	1179	1178	-1650	-1651	-2976	346	2828	1325
chr1	78204959	USP33	ENST00000370793.1	1.15376	781	435	434	-2394	-2395	-3720	346	2828	1325
chr1	78383929	NEXN	ENST00000294624.8	1.87083	624	418	417	-62	-63	-217	206	479	154
chr1	78414905	FUBP1	ENST00000370767.1	1.94563	1948	1861	1860	-107	-108	-575	87	1967	467
chr1	78426073	FUBP1	ENST00000370767.1	1.7378	1539	1452	1451	-516	-517	-984	87	1967	467
chr1	78428475	FUBP1	ENST00000370767.1	1.67276	1411	1324	1323	-644	-645	-1112	87	1967	467
chr1	78428488	FUBP1	ENST00000370767.1	1.66616	1398	1311	1310	-657	-658	-1125	87	1967	467
chr1	78428516	FUBP1	ENST00000370767.1	1.65193	1370	1283	1282	-685	-686	-1153	87	1967	467
chr1	78428565	FUBP1	ENST00000370767.1	1.62703	1321	1234	1233	-734	-735	-1202	87	1967	467
chr1	78429316	FUBP1	ENST00000370767.1	1.57215	1213	1126	1125	-842	-843	-1310	87	1967	467
chr1	78478966	DNAJB4	ENST00000370763.5	1.43688	699	443	442	-571	-572	-2288	256	1013	1716
chr1	78479125	DNAJB4	ENST00000370763.5	1.59369	858	602	601	-412	-413	-2129	256	1013	1716
chr1	78479158	DNAJB4	ENST00000370763.5	1.62623	891	635	634	-379	-380	-2096	256	1013	1716
chr1	78479172	DNAJB4	ENST00000370763.5	1.64004	905	649	648	-365	-366	-2082	256	1013	1716
chr1	78481725	DNAJB4	ENST00000370763.5	1.79684	1064	808	807	-206	-207	-1923	256	1013	1716
chr1	78481745	DNAJB4	ENST00000370763.5	1.81657	1084	828	827	-186	-187	-1903	256	1013	1716
chr1	78481749	DNAJB4	ENST00000370763.5	1.82051	1088	832	831	-182	-183	-1899	256	1013	1716
chr1	78481809	DNAJB4	ENST00000370763.5	1.87968	1148	892	891	-122	-123	-1839	256	1013	1716
chr1	78481818	DNAJB4	ENST00000370763.5	1.88856	1157	901	900	-113	-114	-1830	256	1013	1716
chr1	78481879	DNAJB4	ENST00000370763.5	1.94872	1218	962	961	-52	-53	-1769	256	1013	1716
chr1	78481888	DNAJB4	ENST00000370763.5	1.95759	1227	971	970	-43	-44	-1760	256	1013	1716
chr1	78481891	DNAJB4	ENST00000370763.5	1.96055	1230	974	973	-40	-41	-1757	256	1013	1716
chr1	82409086	LPHN2	ENST00000271029.4	1.19344	1046	831	830	-3465	-3466	-4742	215	4295	1276
chr1	82456724	LPHN2	ENST00000271029.4	1.97556	4406	4191	4190	-105	-106	-1382	215	4295	1276
chr1	84403670	TTLL7	ENST00000260505.8	1.28266	1130	753	752	-1911	-1912	-6845	377	2663	4933
chr1	84408180	TTLL7	ENST00000260505.8	1.25863	1066	689	688	-1975	-1976	-6909	377	2663	4933
chr1	84956071	RPF1	ENST00000370654.5	1.50667	546	532	531	-518	-519	-838	14	1049	319
chr1	84956117	RPF1	ENST00000370654.5	1.55048	592	578	577	-472	-473	-792	14	1049	319
chr1	85020690	CTBS	ENST00000370630.5	1.99309	1198	1150	1149	-8	-9	-5401	48	1157	5392
chr1	85020818	CTBS	ENST00000370630.5	1.88256	1070	1022	1021	-136	-137	-5529	48	1157	5392
chr1	85031532	CTBS	ENST00000370630.5	1.59499	737	689	688	-469	-470	-5862	48	1157	5392
chr1	85031609	CTBS	ENST00000370630.5	1.5285	660	612	611	-546	-547	-5939	48	1157	5392
chr1	85031615	CTBS	ENST00000370630.5	1.52332	654	606	605	-552	-553	-5945	48	1157	5392
chr1	85036291	CTBS	ENST00000370630.5	1.25043	338	290	289	-868	-869	-6261	48	1157	5392
chr1	85036317	CTBS	ENST00000370630.5	1.22798	312	264	263	-894	-895	-6287	48	1157	5392
chr1	85113121	SSX2IP	ENST00000342203.3	1.99729	2103	1840	1839	-5	-6	-3731	263	1844	3725
chr1	85113187	SSX2IP	ENST00000342203.3	1.96152	2037	1774	1773	-71	-72	-3797	263	1844	3725
chr1	85122117	SSX2IP	ENST00000342203.3	1.61192	1392	1129	1128	-716	-717	-4442	263	1844	3725
chr1	85122120	SSX2IP	ENST00000342203.3	1.6103	1389	1126	1125	-719	-720	-4445	263	1844	3725
chr1	85130139	SSX2IP	ENST00000342203.3	1.34363	897	634	633	-1211	-1212	-4937	263	1844	3725
chr1	85130142	SSX2IP	ENST00000342203.3	1.34201	894	631	630	-1214	-1215	-4940	263	1844	3725
chr1	85135376	SSX2IP	ENST00000342203.3	1.22439	677	414	413	-1431	-1432	-5157	263	1844	3725
chr1	85136465	SSX2IP	ENST00000342203.3	1.04173	340	77	76	-1768	-1769	-5494	263	1844	3725
chr1	85136474	SSX2IP	ENST00000342203.3	1.03686	331	68	67	-1777	-1778	-5503	263	1844	3725
chr1	85136880	SSX2IP	ENST00000342203.3	1.01247	286	23	22	-1822	-1823	-5548	263	1844	3725
chr1	85136886	SSX2IP	ENST00000342203.3	1.00921	280	17	16	-1828	-1829	-5554	263	1844	3725
chr1	85279536	LPAR3	ENST00000440886.1	1.99341	1093	1055	1054	-7	-8	-2251	38	1061	2243
chr1	85279712	LPAR3	ENST00000440886.1	1.82768	917	879	878	-183	-184	-2427	38	1061	2243
chr1	85331463	LPAR3	ENST00000440886.1	1.32109	379	341	340	-721	-722	-2965	38	1061	2243
chr1	85331488	LPAR3	ENST00000440886.1	1.29755	354	316	315	-746	-747	-2990	38	1061	2243
chr1	85331507	LPAR3	ENST00000440886.1	1.27966	335	297	296	-765	-766	-3009	38	1061	2243
chr1	85331511	LPAR3	ENST00000440886.1	1.27589	331	293	292	-769	-770	-3013	38	1061	2243
chr1	85331606	LPAR3	ENST00000440886.1	1.18644	236	198	197	-864	-865	-3108	38	1061	2243
chr1	85331684	LPAR3	ENST00000440886.1	1.11299	158	120	119	-942	-943	-3186	38	1061	2243
chr1	85331742	LPAR3	ENST00000440886.1	1.05838	100	62	61	-1000	-1001	-3244	38	1061	2243
chr1	85484907	MCOLN3	ENST00000370589.2	1.93923	1613	1561	1560	-101	-102	-1142	52	1661	1040
chr1	85486837	MCOLN3	ENST00000370589.2	1.86823	1495	1443	1442	-219	-220	-1260	52	1661	1040
chr1	85648433	SYDE2	ENST00000341460.5	1.52775	1941	1892	1891	-1693	-1694	-3570	49	3584	1876
chr1	85648436	SYDE2	ENST00000341460.5	1.52692	1938	1889	1888	-1696	-1697	-3573	49	3584	1876
chr1	85656199	SYDE2	ENST00000341460.5	1.27392	1031	982	981	-2603	-2604	-4480	49	3584	1876
chr1	85656211	SYDE2	ENST00000341460.5	1.27057	1019	970	969	-2615	-2616	-4492	49	3584	1876
chr1	85665954	SYDE2	ENST00000341460.5	1.20251	775	726	725	-2859	-2860	-4736	49	3584	1876
chr1	85725086	C1orf52	ENST00000471115.1	1.42077	239	231	230	-318	-319	-979	8	548	660
chr1	85725137	C1orf52	ENST00000471115.1	1.32787	188	180	179	-369	-370	-1030	8	548	660
chr1	85733330	BCL10	ENST00000370580.1	1.97151	1419	682	681	-20	-21	-1399	737	701	1378
chr1	85790477	DDAH1	ENST00000284031.8	1.8007	781	687	686	-171	-172	-3138	94	857	2966
chr1	86173606	ZNHIT6	ENST00000370574.3	1.25619	495	362	361	-1051	-1052	-2301	133	1412	1249
chr1	86173741	ZNHIT6	ENST00000370574.3	1.16065	360	227	226	-1186	-1187	-2436	133	1412	1249
chr1	86173746	ZNHIT6	ENST00000370574.3	1.15711	355	222	221	-1191	-1192	-2441	133	1412	1249
chr1	86841964	ODF2L	ENST00000294678.2	1.40902	1068	762	761	-1101	-1102	-3198	306	1862	2096
chr1	86851227	ODF2L	ENST00000294678.2	1.08588	466	160	159	-1703	-1704	-3800	306	1862	2096
chr1	86852619	ODF2L	ENST00000294678.2	1.04938	398	92	91	-1771	-1772	-3868	306	1862	2096
chr1	86852626	ODF2L	ENST00000294678.2	1.04563	391	85	84	-1778	-1779	-3875	306	1862	2096
chr1	87181489	SH3GLB1	ENST00000370558.4	1.14117	478	155	154	-943	-944	-5892	323	1097	4948
chr1	87181518	SH3GLB1	ENST00000370558.4	1.16758	507	184	183	-914	-915	-5863	323	1097	4948
chr1	87188288	SH3GLB1	ENST00000370558.4	1.3725	732	409	408	-689	-690	-5638	323	1097	4948
chr1	87190053	SH3GLB1	ENST00000370558.4	1.48725	858	535	534	-563	-564	-5512	323	1097	4948
chr1	87200812	SH3GLB1	ENST00000370558.4	1.64754	1034	711	710	-387	-388	-5336	323	1097	4948
chr1	87208023	SH3GLB1	ENST00000370558.4	1.81421	1217	894	893	-204	-205	-5153	323	1097	4948
chr1	87329238	2023-09-15	ENST00000331835.5	1.83436	670	408	407	-81	-82	-1106	262	488	1024
chr1	89225943	PKN2	ENST00000316005.7	1.21377	746	388	387	-1427	-1428	-1885	358	1814	457
chr1	89225953	PKN2	ENST00000316005.7	1.21928	756	398	397	-1417	-1418	-1875	358	1814	457
chr1	89225960	PKN2	ENST00000316005.7	1.22314	763	405	404	-1410	-1411	-1868	358	1814	457
chr1	89237231	PKN2	ENST00000316005.7	1.41322	1108	750	749	-1065	-1066	-1523	358	1814	457
chr1	89237499	PKN2	ENST00000316005.7	1.50799	1280	922	921	-893	-894	-1351	358	1814	457
chr1	89318910	GTF2B	ENST00000370500.5	1.98528	1055	937	936	-14	-15	-295	118	950	280
chr1	89325658	GTF2B	ENST00000370500.5	1.46477	560	442	441	-509	-510	-790	118	950	280
chr1	89414782	CCBL2	ENST00000260508.4	1.83004	1470	1133	1132	-232	-233	-599	337	1364	366
chr1	89427072	CCBL2	ENST00000260508.4	1.48205	995	658	657	-707	-708	-1074	337	1364	366
chr1	89427086	CCBL2	ENST00000260508.4	1.47179	981	644	643	-721	-722	-1088	337	1364	366
chr1	89427093	CCBL2	ENST00000260508.4	1.46667	974	637	636	-728	-729	-1095	337	1364	366
chr1	89427113	CCBL2	ENST00000260508.4	1.45201	954	617	616	-748	-749	-1115	337	1364	366
chr1	89430538	CCBL2	ENST00000260508.4	1.31282	764	427	426	-938	-939	-1305	337	1364	366
chr1	89448340	RBMXL1	ENST00000321792.5	1.99744	1597	1170	1169	-3	-4	-3201	427	1172	3197
chr1	89448505	RBMXL1	ENST00000321792.5	1.85678	1432	1005	1004	-168	-169	-3366	427	1172	3197
chr1	89448510	RBMXL1	ENST00000321792.5	1.85251	1427	1000	999	-173	-174	-3371	427	1172	3197
chr1	89448561	RBMXL1	ENST00000321792.5	1.80904	1376	949	948	-224	-225	-3422	427	1172	3197
chr1	89448563	RBMXL1	ENST00000321792.5	1.80733	1374	947	946	-226	-227	-3424	427	1172	3197
chr1	89448618	RBMXL1	ENST00000321792.5	1.76044	1319	892	891	-281	-282	-3479	427	1172	3197
chr1	89448620	RBMXL1	ENST00000321792.5	1.75874	1317	890	889	-283	-284	-3481	427	1172	3197
chr1	89449074	RBMXL1	ENST00000321792.5	1.3717	863	436	435	-737	-738	-3935	427	1172	3197
chr1	89449093	RBMXL1	ENST00000321792.5	1.3555	844	417	416	-756	-757	-3954	427	1172	3197
chr1	89449230	RBMXL1	ENST00000321792.5	1.2387	707	280	279	-893	-894	-4091	427	1172	3197
chr1	89449384	RBMXL1	ENST00000321792.5	1.10742	553	126	125	-1047	-1048	-4245	427	1172	3197
chr1	90048266	LRRC8B	ENST00000330947.2	1.02363	416	57	56	-2355	-2356	-7176	359	2411	4820
chr1	90048819	LRRC8B	ENST00000330947.2	1.2529	969	610	609	-1802	-1803	-6623	359	2411	4820
chr1	90048984	LRRC8B	ENST00000330947.2	1.32131	1134	775	774	-1637	-1638	-6458	359	2411	4820
chr1	90049007	LRRC8B	ENST00000330947.2	1.33085	1157	798	797	-1614	-1615	-6435	359	2411	4820
chr1	90049022	LRRC8B	ENST00000330947.2	1.33706	1172	813	812	-1599	-1600	-6420	359	2411	4820
chr1	90049030	LRRC8B	ENST00000330947.2	1.34038	1180	821	820	-1591	-1592	-6412	359	2411	4820
chr1	90049182	LRRC8B	ENST00000330947.2	1.4034	1332	973	972	-1439	-1440	-6260	359	2411	4820
chr1	90049195	LRRC8B	ENST00000330947.2	1.40879	1345	986	985	-1426	-1427	-6247	359	2411	4820
chr1	90049356	LRRC8B	ENST00000330947.2	1.47554	1506	1147	1146	-1265	-1266	-6086	359	2411	4820
chr1	90049412	LRRC8B	ENST00000330947.2	1.49876	1562	1203	1202	-1209	-1210	-6030	359	2411	4820
chr1	90049745	LRRC8B	ENST00000330947.2	1.63682	1895	1536	1535	-876	-877	-5697	359	2411	4820
chr1	90049841	LRRC8B	ENST00000330947.2	1.67662	1991	1632	1631	-780	-781	-5601	359	2411	4820
chr1	90049869	LRRC8B	ENST00000330947.2	1.68823	2019	1660	1659	-752	-753	-5573	359	2411	4820
chr1	90049894	LRRC8B	ENST00000330947.2	1.69859	2044	1685	1684	-727	-728	-5548	359	2411	4820
chr1	90050004	LRRC8B	ENST00000330947.2	1.7442	2154	1795	1794	-617	-618	-5438	359	2411	4820
chr1	90050245	LRRC8B	ENST00000330947.2	1.84411	2395	2036	2035	-376	-377	-5197	359	2411	4820
chr1	90050250	LRRC8B	ENST00000330947.2	1.84619	2400	2041	2040	-371	-372	-5192	359	2411	4820
chr1	90050279	LRRC8B	ENST00000330947.2	1.85821	2429	2070	2069	-342	-343	-5163	359	2411	4820
chr1	90050284	LRRC8B	ENST00000330947.2	1.86028	2434	2075	2074	-337	-338	-5158	359	2411	4820
chr1	90178431	LRRC8C	ENST00000370454.4	1.12521	556	302	301	-2110	-2111	-6661	254	2411	4550
chr1	90178453	LRRC8C	ENST00000370454.4	1.13433	578	324	323	-2088	-2089	-6639	254	2411	4550
chr1	90178528	LRRC8C	ENST00000370454.4	1.16542	653	399	398	-2013	-2014	-6564	254	2411	4550
chr1	90179026	LRRC8C	ENST00000370454.4	1.37189	1151	897	896	-1515	-1516	-6066	254	2411	4550
chr1	90179031	LRRC8C	ENST00000370454.4	1.37396	1156	902	901	-1510	-1511	-6061	254	2411	4550
chr1	90179061	LRRC8C	ENST00000370454.4	1.3864	1186	932	931	-1480	-1481	-6031	254	2411	4550
chr1	90179071	LRRC8C	ENST00000370454.4	1.39055	1196	942	941	-1470	-1471	-6021	254	2411	4550
chr1	90179077	LRRC8C	ENST00000370454.4	1.39303	1202	948	947	-1464	-1465	-6015	254	2411	4550
chr1	90179099	LRRC8C	ENST00000370454.4	1.40216	1224	970	969	-1442	-1443	-5993	254	2411	4550
chr1	90179127	LRRC8C	ENST00000370454.4	1.41376	1252	998	997	-1414	-1415	-5965	254	2411	4550
chr1	90179146	LRRC8C	ENST00000370454.4	1.42164	1271	1017	1016	-1395	-1396	-5946	254	2411	4550
chr1	90179155	LRRC8C	ENST00000370454.4	1.42537	1280	1026	1025	-1386	-1387	-5937	254	2411	4550
chr1	90179165	LRRC8C	ENST00000370454.4	1.42952	1290	1036	1035	-1376	-1377	-5927	254	2411	4550
chr1	90179384	LRRC8C	ENST00000370454.4	1.52032	1509	1255	1254	-1157	-1158	-5708	254	2411	4550
chr1	90179645	LRRC8C	ENST00000370454.4	1.62852	1770	1516	1515	-896	-897	-5447	254	2411	4550
chr1	90179923	LRRC8C	ENST00000370454.4	1.74378	2048	1794	1793	-618	-619	-5169	254	2411	4550
chr1	90180104	LRRC8C	ENST00000370454.4	1.81882	2229	1975	1974	-437	-438	-4988	254	2411	4550
chr1	90180178	LRRC8C	ENST00000370454.4	1.8495	2303	2049	2048	-363	-364	-4914	254	2411	4550
chr1	90180205	LRRC8C	ENST00000370454.4	1.8607	2330	2076	2075	-336	-337	-4887	254	2411	4550
chr1	90180320	LRRC8C	ENST00000370454.4	1.90837	2445	2191	2190	-221	-222	-4772	254	2411	4550
chr1	90398944	LRRC8D	ENST00000337338.5	1.12301	723	317	316	-2260	-2261	-3226	406	2576	965
chr1	90398968	LRRC8D	ENST00000337338.5	1.13232	747	341	340	-2236	-2237	-3202	406	2576	965
chr1	90398980	LRRC8D	ENST00000337338.5	1.13698	759	353	352	-2224	-2225	-3190	406	2576	965
chr1	90398991	LRRC8D	ENST00000337338.5	1.14125	770	364	363	-2213	-2214	-3179	406	2576	965
chr1	90399031	LRRC8D	ENST00000337338.5	1.15677	810	404	403	-2173	-2174	-3139	406	2576	965
chr1	90399043	LRRC8D	ENST00000337338.5	1.16143	822	416	415	-2161	-2162	-3127	406	2576	965
chr1	90399047	LRRC8D	ENST00000337338.5	1.16298	826	420	419	-2157	-2158	-3123	406	2576	965
chr1	90399078	LRRC8D	ENST00000337338.5	1.17501	857	451	450	-2126	-2127	-3092	406	2576	965
chr1	90399089	LRRC8D	ENST00000337338.5	1.17928	868	462	461	-2115	-2116	-3081	406	2576	965
chr1	90399123	LRRC8D	ENST00000337338.5	1.19247	902	496	495	-2081	-2082	-3047	406	2576	965
chr1	90399128	LRRC8D	ENST00000337338.5	1.19441	907	501	500	-2076	-2077	-3042	406	2576	965
chr1	90399135	LRRC8D	ENST00000337338.5	1.19713	914	508	507	-2069	-2070	-3035	406	2576	965
chr1	90399141	LRRC8D	ENST00000337338.5	1.19946	920	514	513	-2063	-2064	-3029	406	2576	965
chr1	90399153	LRRC8D	ENST00000337338.5	1.20411	932	526	525	-2051	-2052	-3017	406	2576	965
chr1	90399155	LRRC8D	ENST00000337338.5	1.20489	934	528	527	-2049	-2050	-3015	406	2576	965
chr1	90399179	LRRC8D	ENST00000337338.5	1.2142	958	552	551	-2025	-2026	-2991	406	2576	965
chr1	90399193	LRRC8D	ENST00000337338.5	1.21964	972	566	565	-2011	-2012	-2977	406	2576	965
chr1	90399210	LRRC8D	ENST00000337338.5	1.22623	989	583	582	-1994	-1995	-2960	406	2576	965
chr1	90399289	LRRC8D	ENST00000337338.5	1.25689	1068	662	661	-1915	-1916	-2881	406	2576	965
chr1	90399346	LRRC8D	ENST00000337338.5	1.27901	1125	719	718	-1858	-1859	-2824	406	2576	965
chr1	90399381	LRRC8D	ENST00000337338.5	1.29259	1160	754	753	-1823	-1824	-2789	406	2576	965
chr1	90399533	LRRC8D	ENST00000337338.5	1.35157	1312	906	905	-1671	-1672	-2637	406	2576	965
chr1	90399569	LRRC8D	ENST00000337338.5	1.36554	1348	942	941	-1635	-1636	-2601	406	2576	965
chr1	90399584	LRRC8D	ENST00000337338.5	1.37136	1363	957	956	-1620	-1621	-2586	406	2576	965
chr1	90399596	LRRC8D	ENST00000337338.5	1.37602	1375	969	968	-1608	-1609	-2574	406	2576	965
chr1	90399617	LRRC8D	ENST00000337338.5	1.38417	1396	990	989	-1587	-1588	-2553	406	2576	965
chr1	90399641	LRRC8D	ENST00000337338.5	1.39348	1420	1014	1013	-1563	-1564	-2529	406	2576	965
chr1	90399663	LRRC8D	ENST00000337338.5	1.40202	1442	1036	1035	-1541	-1542	-2507	406	2576	965
chr1	90399691	LRRC8D	ENST00000337338.5	1.41288	1470	1064	1063	-1513	-1514	-2479	406	2576	965
chr1	90399728	LRRC8D	ENST00000337338.5	1.42724	1507	1101	1100	-1476	-1477	-2442	406	2576	965
chr1	90399734	LRRC8D	ENST00000337338.5	1.42957	1513	1107	1106	-1470	-1471	-2436	406	2576	965
chr1	90399773	LRRC8D	ENST00000337338.5	1.4447	1552	1146	1145	-1431	-1432	-2397	406	2576	965
chr1	90399777	LRRC8D	ENST00000337338.5	1.44626	1556	1150	1149	-1427	-1428	-2393	406	2576	965
chr1	90399782	LRRC8D	ENST00000337338.5	1.4482	1561	1155	1154	-1422	-1423	-2388	406	2576	965
chr1	90399798	LRRC8D	ENST00000337338.5	1.4544	1577	1171	1170	-1406	-1407	-2372	406	2576	965
chr1	90399818	LRRC8D	ENST00000337338.5	1.46217	1597	1191	1190	-1386	-1387	-2352	406	2576	965
chr1	90399855	LRRC8D	ENST00000337338.5	1.47652	1634	1228	1227	-1349	-1350	-2315	406	2576	965
chr1	90399881	LRRC8D	ENST00000337338.5	1.48661	1660	1254	1253	-1323	-1324	-2289	406	2576	965
chr1	90399888	LRRC8D	ENST00000337338.5	1.48933	1667	1261	1260	-1316	-1317	-2282	406	2576	965
chr1	90399908	LRRC8D	ENST00000337338.5	1.49709	1687	1281	1280	-1296	-1297	-2262	406	2576	965
chr1	90399938	LRRC8D	ENST00000337338.5	1.50873	1717	1311	1310	-1266	-1267	-2232	406	2576	965
chr1	90400021	LRRC8D	ENST00000337338.5	1.54094	1800	1394	1393	-1183	-1184	-2149	406	2576	965
chr1	90400037	LRRC8D	ENST00000337338.5	1.54715	1816	1410	1409	-1167	-1168	-2133	406	2576	965
chr1	90400085	LRRC8D	ENST00000337338.5	1.56577	1864	1458	1457	-1119	-1120	-2085	406	2576	965
chr1	90400091	LRRC8D	ENST00000337338.5	1.5681	1870	1464	1463	-1113	-1114	-2079	406	2576	965
chr1	90400096	LRRC8D	ENST00000337338.5	1.57004	1875	1469	1468	-1108	-1109	-2074	406	2576	965
chr1	90400110	LRRC8D	ENST00000337338.5	1.57548	1889	1483	1482	-1094	-1095	-2060	406	2576	965
chr1	90400122	LRRC8D	ENST00000337338.5	1.58013	1901	1495	1494	-1082	-1083	-2048	406	2576	965
chr1	90400165	LRRC8D	ENST00000337338.5	1.59682	1944	1538	1537	-1039	-1040	-2005	406	2576	965
chr1	90400169	LRRC8D	ENST00000337338.5	1.59837	1948	1542	1541	-1035	-1036	-2001	406	2576	965
chr1	90400212	LRRC8D	ENST00000337338.5	1.61506	1991	1585	1584	-992	-993	-1958	406	2576	965
chr1	90400256	LRRC8D	ENST00000337338.5	1.63213	2035	1629	1628	-948	-949	-1914	406	2576	965
chr1	90400267	LRRC8D	ENST00000337338.5	1.6364	2046	1640	1639	-937	-938	-1903	406	2576	965
chr1	90400314	LRRC8D	ENST00000337338.5	1.65464	2093	1687	1686	-890	-891	-1856	406	2576	965
chr1	90400352	LRRC8D	ENST00000337338.5	1.66938	2131	1725	1724	-852	-853	-1818	406	2576	965
chr1	90400426	LRRC8D	ENST00000337338.5	1.6981	2205	1799	1798	-778	-779	-1744	406	2576	965
chr1	90400447	LRRC8D	ENST00000337338.5	1.70625	2226	1820	1819	-757	-758	-1723	406	2576	965
chr1	90400490	LRRC8D	ENST00000337338.5	1.72293	2269	1863	1862	-714	-715	-1680	406	2576	965
chr1	90400495	LRRC8D	ENST00000337338.5	1.72487	2274	1868	1867	-709	-710	-1675	406	2576	965
chr1	90400500	LRRC8D	ENST00000337338.5	1.72681	2279	1873	1872	-704	-705	-1670	406	2576	965
chr1	90400514	LRRC8D	ENST00000337338.5	1.73225	2293	1887	1886	-690	-691	-1656	406	2576	965
chr1	90400538	LRRC8D	ENST00000337338.5	1.74156	2317	1911	1910	-666	-667	-1632	406	2576	965
chr1	90400581	LRRC8D	ENST00000337338.5	1.75825	2360	1954	1953	-623	-624	-1589	406	2576	965
chr1	90400634	LRRC8D	ENST00000337338.5	1.77881	2413	2007	2006	-570	-571	-1536	406	2576	965
chr1	90400638	LRRC8D	ENST00000337338.5	1.78036	2417	2011	2010	-566	-567	-1532	406	2576	965
chr1	90400642	LRRC8D	ENST00000337338.5	1.78192	2421	2015	2014	-562	-563	-1528	406	2576	965
chr1	90400658	LRRC8D	ENST00000337338.5	1.78813	2437	2031	2030	-546	-547	-1512	406	2576	965
chr1	90400677	LRRC8D	ENST00000337338.5	1.7955	2456	2050	2049	-527	-528	-1493	406	2576	965
chr1	90400680	LRRC8D	ENST00000337338.5	1.79666	2459	2053	2052	-524	-525	-1490	406	2576	965
chr1	90400684	LRRC8D	ENST00000337338.5	1.79821	2463	2057	2056	-520	-521	-1486	406	2576	965
chr1	90400706	LRRC8D	ENST00000337338.5	1.80675	2485	2079	2078	-498	-499	-1464	406	2576	965
chr1	90400717	LRRC8D	ENST00000337338.5	1.81102	2496	2090	2089	-487	-488	-1453	406	2576	965
chr1	90400722	LRRC8D	ENST00000337338.5	1.81296	2501	2095	2094	-482	-483	-1448	406	2576	965
chr1	90400735	LRRC8D	ENST00000337338.5	1.81801	2514	2108	2107	-469	-470	-1435	406	2576	965
chr1	90400742	LRRC8D	ENST00000337338.5	1.82072	2521	2115	2114	-462	-463	-1428	406	2576	965
chr1	90400756	LRRC8D	ENST00000337338.5	1.82615	2535	2129	2128	-448	-449	-1414	406	2576	965
chr1	90400766	LRRC8D	ENST00000337338.5	1.83003	2545	2139	2138	-438	-439	-1404	406	2576	965
chr1	90400768	LRRC8D	ENST00000337338.5	1.83081	2547	2141	2140	-436	-437	-1402	406	2576	965
chr1	90400772	LRRC8D	ENST00000337338.5	1.83236	2551	2145	2144	-432	-433	-1398	406	2576	965
chr1	90400775	LRRC8D	ENST00000337338.5	1.83353	2554	2148	2147	-429	-430	-1395	406	2576	965
chr1	90400781	LRRC8D	ENST00000337338.5	1.83586	2560	2154	2153	-423	-424	-1389	406	2576	965
chr1	90400791	LRRC8D	ENST00000337338.5	1.83974	2570	2164	2163	-413	-414	-1379	406	2576	965
chr1	90400812	LRRC8D	ENST00000337338.5	1.84789	2591	2185	2184	-392	-393	-1358	406	2576	965
chr1	90400818	LRRC8D	ENST00000337338.5	1.85021	2597	2191	2190	-386	-387	-1352	406	2576	965
chr1	90400826	LRRC8D	ENST00000337338.5	1.85332	2605	2199	2198	-378	-379	-1344	406	2576	965
chr1	90400841	LRRC8D	ENST00000337338.5	1.85914	2620	2214	2213	-363	-364	-1329	406	2576	965
chr1	90400852	LRRC8D	ENST00000337338.5	1.86341	2631	2225	2224	-352	-353	-1318	406	2576	965
chr1	90400886	LRRC8D	ENST00000337338.5	1.8766	2665	2259	2258	-318	-319	-1284	406	2576	965
chr1	90400893	LRRC8D	ENST00000337338.5	1.87932	2672	2266	2265	-311	-312	-1277	406	2576	965
chr1	90400906	LRRC8D	ENST00000337338.5	1.88436	2685	2279	2278	-298	-299	-1264	406	2576	965
chr1	90400913	LRRC8D	ENST00000337338.5	1.88708	2692	2286	2285	-291	-292	-1257	406	2576	965
chr1	90400926	LRRC8D	ENST00000337338.5	1.89212	2705	2299	2298	-278	-279	-1244	406	2576	965
chr1	90400935	LRRC8D	ENST00000337338.5	1.89562	2714	2308	2307	-269	-270	-1235	406	2576	965
chr1	90400988	LRRC8D	ENST00000337338.5	1.91618	2767	2361	2360	-216	-217	-1182	406	2576	965
chr1	90400990	LRRC8D	ENST00000337338.5	1.91696	2769	2363	2362	-214	-215	-1180	406	2576	965
chr1	90401029	LRRC8D	ENST00000337338.5	1.93209	2808	2402	2401	-175	-176	-1141	406	2576	965
chr1	90401031	LRRC8D	ENST00000337338.5	1.93287	2810	2404	2403	-173	-174	-1139	406	2576	965
chr1	90401051	LRRC8D	ENST00000337338.5	1.94063	2830	2424	2423	-153	-154	-1119	406	2576	965
chr1	90401060	LRRC8D	ENST00000337338.5	1.94412	2839	2433	2432	-144	-145	-1110	406	2576	965
chr1	90401088	LRRC8D	ENST00000337338.5	1.95499	2867	2461	2460	-116	-117	-1082	406	2576	965
chr1	90401096	LRRC8D	ENST00000337338.5	1.95809	2875	2469	2468	-108	-109	-1074	406	2576	965
chr1	90401126	LRRC8D	ENST00000337338.5	1.96973	2905	2499	2498	-78	-79	-1044	406	2576	965
chr1	90401147	LRRC8D	ENST00000337338.5	1.97788	2926	2520	2519	-57	-58	-1023	406	2576	965
chr1	90473245	ZNF326	ENST00000340281.4	1.31504	693	551	550	-1198	-1199	-2035	142	1748	836
chr1	90482940	ZNF326	ENST00000340281.4	1.56661	1133	991	990	-758	-759	-1595	142	1748	836
chr1	90486428	ZNF326	ENST00000340281.4	1.71584	1394	1252	1251	-497	-498	-1334	142	1748	836
chr1	91382398	ZNF644	ENST00000337393.5	1.98921	4181	3941	3940	-43	-44	-1501	240	3983	1457
chr1	91382469	ZNF644	ENST00000337393.5	1.97139	4110	3870	3869	-114	-115	-1572	240	3983	1457
chr1	91403221	ZNF644	ENST00000337393.5	1.88077	3749	3509	3508	-475	-476	-1933	240	3983	1457
chr1	91403263	ZNF644	ENST00000337393.5	1.87023	3707	3467	3466	-517	-518	-1975	240	3983	1457
chr1	91403530	ZNF644	ENST00000337393.5	1.80321	3440	3200	3199	-784	-785	-2242	240	3983	1457
chr1	91403904	ZNF644	ENST00000337393.5	1.75477	3247	3007	3006	-977	-978	-2435	240	3983	1457
chr1	91404071	ZNF644	ENST00000337393.5	1.71285	3080	2840	2839	-1144	-1145	-2602	240	3983	1457
chr1	91404127	ZNF644	ENST00000337393.5	1.6988	3024	2784	2783	-1200	-1201	-2658	240	3983	1457
chr1	91404130	ZNF644	ENST00000337393.5	1.69804	3021	2781	2780	-1203	-1204	-2661	240	3983	1457
chr1	91404140	ZNF644	ENST00000337393.5	1.69553	3011	2771	2770	-1213	-1214	-2671	240	3983	1457
chr1	91404172	ZNF644	ENST00000337393.5	1.6875	2979	2739	2738	-1245	-1246	-2703	240	3983	1457
chr1	91404191	ZNF644	ENST00000337393.5	1.68273	2960	2720	2719	-1264	-1265	-2722	240	3983	1457
chr1	91404261	ZNF644	ENST00000337393.5	1.66516	2890	2650	2649	-1334	-1335	-2792	240	3983	1457
chr1	91404299	ZNF644	ENST00000337393.5	1.65562	2852	2612	2611	-1372	-1373	-2830	240	3983	1457
chr1	91404304	ZNF644	ENST00000337393.5	1.65437	2847	2607	2606	-1377	-1378	-2835	240	3983	1457
chr1	91404307	ZNF644	ENST00000337393.5	1.65361	2844	2604	2603	-1380	-1381	-2838	240	3983	1457
chr1	91404498	ZNF644	ENST00000337393.5	1.60567	2653	2413	2412	-1571	-1572	-3029	240	3983	1457
chr1	91404502	ZNF644	ENST00000337393.5	1.60467	2649	2409	2408	-1575	-1576	-3033	240	3983	1457
chr1	91404532	ZNF644	ENST00000337393.5	1.59714	2619	2379	2378	-1605	-1606	-3063	240	3983	1457
chr1	91404562	ZNF644	ENST00000337393.5	1.58961	2589	2349	2348	-1635	-1636	-3093	240	3983	1457
chr1	91404569	ZNF644	ENST00000337393.5	1.58785	2582	2342	2341	-1642	-1643	-3100	240	3983	1457
chr1	91404594	ZNF644	ENST00000337393.5	1.58158	2557	2317	2316	-1667	-1668	-3125	240	3983	1457
chr1	91404887	ZNF644	ENST00000337393.5	1.50803	2264	2024	2023	-1960	-1961	-3418	240	3983	1457
chr1	91404920	ZNF644	ENST00000337393.5	1.49975	2231	1991	1990	-1993	-1994	-3451	240	3983	1457
chr1	91404980	ZNF644	ENST00000337393.5	1.48469	2171	1931	1930	-2053	-2054	-3511	240	3983	1457
chr1	91405130	ZNF644	ENST00000337393.5	1.44704	2021	1781	1780	-2203	-2204	-3661	240	3983	1457
chr1	91405198	ZNF644	ENST00000337393.5	1.42997	1953	1713	1712	-2271	-2272	-3729	240	3983	1457
chr1	91405212	ZNF644	ENST00000337393.5	1.42646	1939	1699	1698	-2285	-2286	-3743	240	3983	1457
chr1	91405214	ZNF644	ENST00000337393.5	1.42595	1937	1697	1696	-2287	-2288	-3745	240	3983	1457
chr1	91405526	ZNF644	ENST00000337393.5	1.34764	1625	1385	1384	-2599	-2600	-4057	240	3983	1457
chr1	91405539	ZNF644	ENST00000337393.5	1.34438	1612	1372	1371	-2612	-2613	-4070	240	3983	1457
chr1	91405673	ZNF644	ENST00000337393.5	1.31074	1478	1238	1237	-2746	-2747	-4204	240	3983	1457
chr1	91405769	ZNF644	ENST00000337393.5	1.28665	1382	1142	1141	-2842	-2843	-4300	240	3983	1457
chr1	91405775	ZNF644	ENST00000337393.5	1.28514	1376	1136	1135	-2848	-2849	-4306	240	3983	1457
chr1	91405903	ZNF644	ENST00000337393.5	1.25301	1248	1008	1007	-2976	-2977	-4434	240	3983	1457
chr1	91405929	ZNF644	ENST00000337393.5	1.24649	1222	982	981	-3002	-3003	-4460	240	3983	1457
chr1	91405939	ZNF644	ENST00000337393.5	1.24398	1212	972	971	-3012	-3013	-4470	240	3983	1457
chr1	91405950	ZNF644	ENST00000337393.5	1.24121	1201	961	960	-3023	-3024	-4481	240	3983	1457
chr1	91406250	ZNF644	ENST00000337393.5	1.16591	901	661	660	-3323	-3324	-4781	240	3983	1457
chr1	91406270	ZNF644	ENST00000337393.5	1.16089	881	641	640	-3343	-3344	-4801	240	3983	1457
chr1	91406315	ZNF644	ENST00000337393.5	1.1496	836	596	595	-3388	-3389	-4846	240	3983	1457
chr1	91406495	ZNF644	ENST00000337393.5	1.10442	656	416	415	-3568	-3569	-5026	240	3983	1457
chr1	91406567	ZNF644	ENST00000337393.5	1.08635	584	344	343	-3640	-3641	-5098	240	3983	1457
chr1	91406584	ZNF644	ENST00000337393.5	1.08208	567	327	326	-3657	-3658	-5115	240	3983	1457
chr1	91406631	ZNF644	ENST00000337393.5	1.07028	520	280	279	-3704	-3705	-5162	240	3983	1457
chr1	91406663	ZNF644	ENST00000337393.5	1.06225	488	248	247	-3736	-3737	-5194	240	3983	1457
chr1	91406688	ZNF644	ENST00000337393.5	1.05597	463	223	222	-3761	-3762	-5219	240	3983	1457
chr1	91406691	ZNF644	ENST00000337393.5	1.05522	460	220	219	-3764	-3765	-5222	240	3983	1457
chr1	91406712	ZNF644	ENST00000337393.5	1.04995	439	199	198	-3785	-3786	-5243	240	3983	1457
chr1	91406717	ZNF644	ENST00000337393.5	1.04869	434	194	193	-3790	-3791	-5248	240	3983	1457
chr1	91406724	ZNF644	ENST00000337393.5	1.04694	427	187	186	-3797	-3798	-5255	240	3983	1457
chr1	91406815	ZNF644	ENST00000337393.5	1.0241	336	96	95	-3888	-3889	-5346	240	3983	1457
chr1	91977399	CDC7	ENST00000234626.6	1.28464	609	491	490	-1234	-1235	-2563	118	1724	1328
chr1	91977431	CDC7	ENST00000234626.6	1.30319	641	523	522	-1202	-1203	-2531	118	1724	1328
chr1	91977433	CDC7	ENST00000234626.6	1.30435	643	525	524	-1200	-1201	-2529	118	1724	1328
chr1	91979558	CDC7	ENST00000234626.6	1.50783	994	876	875	-849	-850	-2178	118	1724	1328
chr1	91979580	CDC7	ENST00000234626.6	1.52058	1016	898	897	-827	-828	-2156	118	1724	1328
chr1	91980406	CDC7	ENST00000234626.6	1.55014	1067	949	948	-776	-777	-2105	118	1724	1328
chr1	91989791	CDC7	ENST00000234626.6	1.88348	1642	1524	1523	-201	-202	-1530	118	1724	1328
chr1	92528814	EPHX4	ENST00000370383.4	1.97337	1157	1060	1059	-29	-30	-279	97	1088	249
chr1	92754610	GLMN	ENST00000370360.3	1.27619	574	493	492	-1292	-1293	-1420	81	1784	127
chr1	92754660	GLMN	ENST00000370360.3	1.24818	524	443	442	-1342	-1343	-1470	81	1784	127
chr1	92756993	GLMN	ENST00000370360.3	1.14958	348	267	266	-1518	-1519	-1646	81	1784	127
chr1	92757065	GLMN	ENST00000370360.3	1.10924	276	195	194	-1590	-1591	-1718	81	1784	127
chr1	92789109	RPAP2	ENST00000610020.1	1.34367	740	632	631	-1207	-1208	-16252	108	1838	15044
chr1	92789181	RPAP2	ENST00000610020.1	1.38282	812	704	703	-1135	-1136	-16180	108	1838	15044
chr1	92789248	RPAP2	ENST00000610020.1	1.41925	879	771	770	-1068	-1069	-16113	108	1838	15044
chr1	92789434	RPAP2	ENST00000610020.1	1.52039	1065	957	956	-882	-883	-15927	108	1838	15044
chr1	92944173	GFI1	ENST00000294702.5	1.83688	1311	1062	1061	-207	-208	-1472	249	1268	1264
chr1	93160927	EVI5	ENST00000370331.1	1.40321	990	981	980	-1452	-1453	-6412	9	2432	4959
chr1	93163479	EVI5	ENST00000370331.1	1.3432	844	835	834	-1598	-1599	-6558	9	2432	4959
chr1	93169011	EVI5	ENST00000370331.1	1.26182	646	637	636	-1796	-1797	-6756	9	2432	4959
chr1	93201993	EVI5	ENST00000370331.1	1.09988	252	243	242	-2190	-2191	-7150	9	2432	4959
chr1	93300389	RPL5	ENST00000370321.3	1.27181	332	243	242	-651	-652	-710	89	893	58
chr1	93300393	RPL5	ENST00000370321.3	1.27629	336	247	246	-647	-648	-706	89	893	58
chr1	93303106	RPL5	ENST00000370321.3	1.69463	710	621	620	-273	-274	-332	89	893	58
chr1	93303115	RPL5	ENST00000370321.3	1.7047	719	630	629	-264	-265	-323	89	893	58
chr1	93307351	RPL5	ENST00000370321.3	1.92058	912	823	822	-71	-72	-130	89	893	58
chr1	93308955	FAM69A	ENST00000370310.4	1.98834	1342	1272	1271	-15	-16	-1231	70	1286	1215
chr1	93309117	FAM69A	ENST00000370310.4	1.86247	1180	1110	1109	-177	-178	-1393	70	1286	1215
chr1	93309130	FAM69A	ENST00000370310.4	1.85237	1167	1097	1096	-190	-191	-1406	70	1286	1215
chr1	93309523	FAM69A	ENST00000370310.4	1.54701	774	704	703	-583	-584	-1799	70	1286	1215
chr1	93309638	FAM69A	ENST00000370310.4	1.45765	659	589	588	-698	-699	-1914	70	1286	1215
chr1	93309684	FAM69A	ENST00000370310.4	1.42191	613	543	542	-744	-745	-1960	70	1286	1215
chr1	93312746	FAM69A	ENST00000370310.4	1.36364	538	468	467	-819	-820	-2035	70	1286	1215
chr1	93312755	FAM69A	ENST00000370310.4	1.35664	529	459	458	-828	-829	-2044	70	1286	1215
chr1	93312775	FAM69A	ENST00000370310.4	1.3411	509	439	438	-848	-849	-2064	70	1286	1215
chr1	93312826	FAM69A	ENST00000370310.4	1.30148	458	388	387	-899	-900	-2115	70	1286	1215
chr1	93312837	FAM69A	ENST00000370310.4	1.29293	447	377	376	-910	-911	-2126	70	1286	1215
chr1	93312871	FAM69A	ENST00000370310.4	1.26651	413	343	342	-944	-945	-2160	70	1286	1215
chr1	93316411	FAM69A	ENST00000370310.4	1.22611	361	291	290	-996	-997	-2212	70	1286	1215
chr1	93316421	FAM69A	ENST00000370310.4	1.21834	351	281	280	-1006	-1007	-2222	70	1286	1215
chr1	93316441	FAM69A	ENST00000370310.4	1.2028	331	261	260	-1026	-1027	-2242	70	1286	1215
chr1	93316448	FAM69A	ENST00000370310.4	1.19736	324	254	253	-1033	-1034	-2249	70	1286	1215
chr1	93316454	FAM69A	ENST00000370310.4	1.1927	318	248	247	-1039	-1040	-2255	70	1286	1215
chr1	93316468	FAM69A	ENST00000370310.4	1.18182	304	234	233	-1053	-1054	-2269	70	1286	1215
chr1	93341868	FAM69A	ENST00000370310.4	1.1352	244	174	173	-1113	-1114	-2329	70	1286	1215
chr1	93575890	MTF2	ENST00000370298.4	1.06117	397	109	108	-1673	-1674	-3727	288	1781	2053
chr1	93580635	MTF2	ENST00000370298.4	1.26543	761	473	472	-1309	-1310	-3363	288	1781	2053
chr1	93581085	MTF2	ENST00000370298.4	1.30415	830	542	541	-1240	-1241	-3294	288	1781	2053
chr1	93581126	MTF2	ENST00000370298.4	1.32716	871	583	582	-1199	-1200	-3253	288	1781	2053
chr1	93586189	MTF2	ENST00000370298.4	1.49439	1169	881	880	-901	-902	-2955	288	1781	2053
chr1	93602324	MTF2	ENST00000370298.4	1.8541	1810	1522	1521	-260	-261	-2314	288	1781	2053
chr1	93602331	MTF2	ENST00000370298.4	1.85802	1817	1529	1528	-253	-254	-2307	288	1781	2053
chr1	93602395	MTF2	ENST00000370298.4	1.89394	1881	1593	1592	-189	-190	-2243	288	1781	2053
chr1	93602397	MTF2	ENST00000370298.4	1.89506	1883	1595	1594	-187	-188	-2241	288	1781	2053
chr1	93602413	MTF2	ENST00000370298.4	1.90404	1899	1611	1610	-171	-172	-2225	288	1781	2053
chr1	93602574	MTF2	ENST00000370298.4	1.99439	2060	1772	1771	-10	-11	-2064	288	1781	2053
chr1	93620332	TMED5	ENST00000370282.3	1.84783	1070	585	584	-105	-106	-5033	485	689	4927
chr1	93620355	TMED5	ENST00000370282.3	1.81449	1047	562	561	-128	-129	-5056	485	689	4927
chr1	93620418	TMED5	ENST00000370282.3	1.72319	984	499	498	-191	-192	-5119	485	689	4927
chr1	93621891	TMED5	ENST00000370282.3	1.63333	922	437	436	-253	-254	-5181	485	689	4927
chr1	93812325	DR1	ENST00000370267.1	1.23164	709	123	122	-408	-409	-937	586	530	528
chr1	93812379	DR1	ENST00000370267.1	1.33333	763	177	176	-354	-355	-883	586	530	528
chr1	93812404	DR1	ENST00000370267.1	1.38041	788	202	201	-329	-330	-858	586	530	528
chr1	93819496	DR1	ENST00000370267.1	1.47458	838	252	251	-279	-280	-808	586	530	528
chr1	93996375	FNBP1L	ENST00000260506.8	1.34662	724	574	573	-1082	-1083	-4616	150	1655	3533
chr1	94016642	FNBP1L	ENST00000260506.8	1.97585	1766	1616	1615	-40	-41	-3574	150	1655	3533
chr1	94341883	DNTTIP2	ENST00000436063.2	1.70806	1665	1608	1607	-663	-664	-2697	57	2270	2033
chr1	94342193	DNTTIP2	ENST00000436063.2	1.57155	1355	1298	1297	-973	-974	-3007	57	2270	2033
chr1	94342210	DNTTIP2	ENST00000436063.2	1.56407	1338	1281	1280	-990	-991	-3024	57	2270	2033
chr1	94342220	DNTTIP2	ENST00000436063.2	1.55967	1328	1271	1270	-1000	-1001	-3034	57	2270	2033
chr1	94342258	DNTTIP2	ENST00000436063.2	1.54293	1290	1233	1232	-1038	-1039	-3072	57	2270	2033
chr1	94342325	DNTTIP2	ENST00000436063.2	1.51343	1223	1166	1165	-1105	-1106	-3139	57	2270	2033
chr1	94342357	DNTTIP2	ENST00000436063.2	1.49934	1191	1134	1133	-1137	-1138	-3171	57	2270	2033
chr1	94342400	DNTTIP2	ENST00000436063.2	1.48041	1148	1091	1090	-1180	-1181	-3214	57	2270	2033
chr1	94342431	DNTTIP2	ENST00000436063.2	1.46675	1117	1060	1059	-1211	-1212	-3245	57	2270	2033
chr1	94342469	DNTTIP2	ENST00000436063.2	1.45002	1079	1022	1021	-1249	-1250	-3283	57	2270	2033
chr1	94342494	DNTTIP2	ENST00000436063.2	1.43901	1054	997	996	-1274	-1275	-3308	57	2270	2033
chr1	94342505	DNTTIP2	ENST00000436063.2	1.43417	1043	986	985	-1285	-1286	-3319	57	2270	2033
chr1	94342611	DNTTIP2	ENST00000436063.2	1.38749	937	880	879	-1391	-1392	-3425	57	2270	2033
chr1	94342648	DNTTIP2	ENST00000436063.2	1.3712	900	843	842	-1428	-1429	-3462	57	2270	2033
chr1	94342678	DNTTIP2	ENST00000436063.2	1.35799	870	813	812	-1458	-1459	-3492	57	2270	2033
chr1	94342733	DNTTIP2	ENST00000436063.2	1.33377	815	758	757	-1513	-1514	-3547	57	2270	2033
chr1	94342764	DNTTIP2	ENST00000436063.2	1.32012	784	727	726	-1544	-1545	-3578	57	2270	2033
chr1	94342824	DNTTIP2	ENST00000436063.2	1.2937	724	667	666	-1604	-1605	-3638	57	2270	2033
chr1	94342952	DNTTIP2	ENST00000436063.2	1.23734	596	539	538	-1732	-1733	-3766	57	2270	2033
chr1	94343012	DNTTIP2	ENST00000436063.2	1.21092	536	479	478	-1792	-1793	-3826	57	2270	2033
chr1	94354576	GCLM	ENST00000370238.3	1.96364	1041	795	794	-30	-31	-3815	246	824	3784
chr1	94670643	ARHGAP29	ENST00000260526.6	1.17723	853	671	670	-3115	-3116	-5233	182	3785	2117
chr1	94670651	ARHGAP29	ENST00000260526.6	1.17512	845	663	662	-3123	-3124	-5241	182	3785	2117
chr1	94670685	ARHGAP29	ENST00000260526.6	1.16614	811	629	628	-3157	-3158	-5275	182	3785	2117
chr1	94670709	ARHGAP29	ENST00000260526.6	1.1598	787	605	604	-3181	-3182	-5299	182	3785	2117
chr1	94670711	ARHGAP29	ENST00000260526.6	1.15927	785	603	602	-3183	-3184	-5301	182	3785	2117
chr1	94696997	ARHGAP29	ENST00000260526.6	1.04517	353	171	170	-3615	-3616	-5733	182	3785	2117
chr1	94697003	ARHGAP29	ENST00000260526.6	1.04358	347	165	164	-3621	-3622	-5739	182	3785	2117
chr1	94697091	ARHGAP29	ENST00000260526.6	1.02034	259	77	76	-3709	-3710	-5827	182	3785	2117
chr1	94697152	ARHGAP29	ENST00000260526.6	1.00423	198	16	15	-3770	-3771	-5888	182	3785	2117
chr1	95364967	CNN3	ENST00000370206.4	1.61414	991	608	607	-382	-383	-1173	383	989	790
chr1	95364975	CNN3	ENST00000370206.4	1.60606	983	600	599	-390	-391	-1181	383	989	790
chr1	95367284	CNN3	ENST00000370206.4	1.44646	825	442	441	-548	-549	-1339	383	989	790
chr1	95367702	CNN3	ENST00000370206.4	1.36263	742	359	358	-631	-632	-1422	383	989	790
chr1	95367719	CNN3	ENST00000370206.4	1.34545	725	342	341	-648	-649	-1439	383	989	790
chr1	95709885	RWDD3	ENST00000263893.6	1.34694	223	204	203	-384	-385	-854	19	587	469
chr1	95709887	RWDD3	ENST00000263893.6	1.35034	225	206	205	-382	-383	-852	19	587	469
chr1	95710070	RWDD3	ENST00000263893.6	1.66156	408	389	388	-199	-200	-669	19	587	469
chr1	95710073	RWDD3	ENST00000263893.6	1.66667	411	392	391	-196	-197	-666	19	587	469
chr1	95710106	RWDD3	ENST00000263893.6	1.72279	444	425	424	-163	-164	-633	19	587	469
chr1	99127350	SNX7	ENST00000306121.3	1.04646	71	63	62	-1293	-1294	-1662	8	1355	368
chr1	99150487	SNX7	ENST00000306121.3	1.1674	235	227	226	-1129	-1130	-1498	8	1355	368
chr1	99150567	SNX7	ENST00000306121.3	1.2264	315	307	306	-1049	-1050	-1418	8	1355	368
chr1	99150576	SNX7	ENST00000306121.3	1.23304	324	316	315	-1040	-1041	-1409	8	1355	368
chr1	99157147	SNX7	ENST00000306121.3	1.39159	539	531	530	-825	-826	-1194	8	1355	368
chr1	99157186	SNX7	ENST00000306121.3	1.42035	578	570	569	-786	-787	-1155	8	1355	368
chr1	99157199	SNX7	ENST00000306121.3	1.42994	591	583	582	-773	-774	-1142	8	1355	368
chr1	99157206	SNX7	ENST00000306121.3	1.4351	598	590	589	-766	-767	-1135	8	1355	368
chr1	99157228	SNX7	ENST00000306121.3	1.45133	620	612	611	-744	-745	-1113	8	1355	368
chr1	99161129	SNX7	ENST00000306121.3	1.51254	703	695	694	-661	-662	-1030	8	1355	368
chr1	99161169	SNX7	ENST00000306121.3	1.54204	743	735	734	-621	-622	-990	8	1355	368
chr1	99161248	SNX7	ENST00000306121.3	1.60029	822	814	813	-542	-543	-911	8	1355	368
chr1	99225638	SNX7	ENST00000306121.3	1.96386	1315	1307	1306	-49	-50	-418	8	1355	368
chr1	100459174	SLC35A3	ENST00000370155.3	1.06544	455	64	63	-914	-915	-1891	391	977	976
chr1	100464880	SLC35A3	ENST00000370155.3	1.25665	642	251	250	-727	-728	-1704	391	977	976
chr1	100464882	SLC35A3	ENST00000370155.3	1.25869	644	253	252	-725	-726	-1702	391	977	976
chr1	100464888	SLC35A3	ENST00000370155.3	1.26483	650	259	258	-719	-720	-1696	391	977	976
chr1	100464901	SLC35A3	ENST00000370155.3	1.27812	663	272	271	-706	-707	-1683	391	977	976
chr1	100464918	SLC35A3	ENST00000370155.3	1.2955	680	289	288	-689	-690	-1666	391	977	976
chr1	100464964	SLC35A3	ENST00000370155.3	1.34254	726	335	334	-643	-644	-1620	391	977	976
chr1	100477043	SLC35A3	ENST00000370155.3	1.60123	979	588	587	-390	-391	-1367	391	977	976
chr1	100477054	SLC35A3	ENST00000370155.3	1.61247	990	599	598	-379	-380	-1356	391	977	976
chr1	100477059	SLC35A3	ENST00000370155.3	1.61759	995	604	603	-374	-375	-1351	391	977	976
chr1	100480895	SLC35A3	ENST00000370155.3	1.68712	1063	672	671	-306	-307	-1283	391	977	976
chr1	100480911	SLC35A3	ENST00000370155.3	1.70348	1079	688	687	-290	-291	-1267	391	977	976
chr1	100480918	SLC35A3	ENST00000370155.3	1.71063	1086	695	694	-283	-284	-1260	391	977	976
chr1	100480935	SLC35A3	ENST00000370155.3	1.72802	1103	712	711	-266	-267	-1243	391	977	976
chr1	100480950	SLC35A3	ENST00000370155.3	1.74335	1118	727	726	-251	-252	-1228	391	977	976
chr1	100480954	SLC35A3	ENST00000370155.3	1.74744	1122	731	730	-247	-248	-1224	391	977	976
chr1	100480974	SLC35A3	ENST00000370155.3	1.76789	1142	751	750	-227	-228	-1204	391	977	976
chr1	100483308	SLC35A3	ENST00000370155.3	1.84254	1215	824	823	-154	-155	-1131	391	977	976
chr1	100487974	SLC35A3	ENST00000370155.3	1.9407	1311	920	919	-58	-59	-1035	391	977	976
chr1	100488000	SLC35A3	ENST00000370155.3	1.96728	1337	946	945	-32	-33	-1009	391	977	976
chr1	100488022	SLC35A3	ENST00000370155.3	1.98978	1359	968	967	-10	-11	-987	391	977	976
chr1	100525513	HIAT1	ENST00000370152.3	1.21928	458	323	322	-1150	-1151	-2318	135	1472	1167
chr1	100525525	HIAT1	ENST00000370152.3	1.22743	470	335	334	-1138	-1139	-2306	135	1472	1167
chr1	100534078	HIAT1	ENST00000370152.3	1.51256	890	755	754	-718	-719	-1886	135	1472	1167
chr1	100534086	HIAT1	ENST00000370152.3	1.51799	898	763	762	-710	-711	-1878	135	1472	1167
chr1	100534094	HIAT1	ENST00000370152.3	1.52342	906	771	770	-702	-703	-1870	135	1472	1167
chr1	100534098	HIAT1	ENST00000370152.3	1.52614	910	775	774	-698	-699	-1866	135	1472	1167
chr1	100542799	HIAT1	ENST00000370152.3	1.65852	1105	970	969	-503	-504	-1671	135	1472	1167
chr1	100544080	HIAT1	ENST00000370152.3	1.73184	1213	1078	1077	-395	-396	-1563	135	1472	1167
chr1	100661825	DBT	ENST00000370132.4	1.99034	1448	1435	1434	-14	-15	-9350	13	1448	9335
chr1	100672090	DBT	ENST00000370132.4	1.77295	1133	1120	1119	-329	-330	-9665	13	1448	9335
chr1	100680379	DBT	ENST00000370132.4	1.64389	946	933	932	-516	-517	-9852	13	1448	9335
chr1	100680453	DBT	ENST00000370132.4	1.59282	872	859	858	-590	-591	-9926	13	1448	9335
chr1	100680458	DBT	ENST00000370132.4	1.58937	867	854	853	-595	-596	-9931	13	1448	9335
chr1	100681604	DBT	ENST00000370132.4	1.48792	720	707	706	-742	-743	-10078	13	1448	9335
chr1	100681609	DBT	ENST00000370132.4	1.48447	715	702	701	-747	-748	-10083	13	1448	9335
chr1	100740457	RTCA	ENST00000260563.4	1.51754	716	590	589	-550	-551	-817	126	1139	266
chr1	100740475	RTCA	ENST00000260563.4	1.53333	734	608	607	-532	-533	-799	126	1139	266
chr1	101339516	EXTL2	ENST00000370113.3	1.98187	1261	975	974	-18	-19	-1573	286	992	1554
chr1	101339527	EXTL2	ENST00000370113.3	1.9708	1250	964	963	-29	-30	-1584	286	992	1554
chr1	101339552	EXTL2	ENST00000370113.3	1.94562	1225	939	938	-54	-55	-1609	286	992	1554
chr1	101339649	EXTL2	ENST00000370113.3	1.84794	1128	842	841	-151	-152	-1706	286	992	1554
chr1	101339715	EXTL2	ENST00000370113.3	1.78147	1062	776	775	-217	-218	-1772	286	992	1554
chr1	101339812	EXTL2	ENST00000370113.3	1.68379	965	679	678	-314	-315	-1869	286	992	1554
chr1	101339899	EXTL2	ENST00000370113.3	1.59617	878	592	591	-401	-402	-1956	286	992	1554
chr1	101339921	EXTL2	ENST00000370113.3	1.57402	856	570	569	-423	-424	-1978	286	992	1554
chr1	101339934	EXTL2	ENST00000370113.3	1.56093	843	557	556	-436	-437	-1991	286	992	1554
chr1	101339937	EXTL2	ENST00000370113.3	1.55791	840	554	553	-439	-440	-1994	286	992	1554
chr1	101339940	EXTL2	ENST00000370113.3	1.55488	837	551	550	-442	-443	-1997	286	992	1554
chr1	101343165	EXTL2	ENST00000370113.3	1.30211	586	300	299	-693	-694	-2248	286	992	1554
chr1	101343197	EXTL2	ENST00000370113.3	1.26989	554	268	267	-725	-726	-2280	286	992	1554
chr1	101343233	EXTL2	ENST00000370113.3	1.23364	518	232	231	-761	-762	-2316	286	992	1554
chr1	101343238	EXTL2	ENST00000370113.3	1.2286	513	227	226	-766	-767	-2321	286	992	1554
chr1	101343246	EXTL2	ENST00000370113.3	1.22054	505	219	218	-774	-775	-2329	286	992	1554
chr1	101343250	EXTL2	ENST00000370113.3	1.21652	501	215	214	-778	-779	-2333	286	992	1554
chr1	101343265	EXTL2	ENST00000370113.3	1.20141	486	200	199	-793	-794	-2348	286	992	1554
chr1	101343347	EXTL2	ENST00000370113.3	1.11883	404	118	117	-875	-876	-2430	286	992	1554
chr1	101343374	EXTL2	ENST00000370113.3	1.09164	377	91	90	-902	-903	-2457	286	992	1554
chr1	101343390	EXTL2	ENST00000370113.3	1.07553	361	75	74	-918	-919	-2473	286	992	1554
chr1	101343400	EXTL2	ENST00000370113.3	1.06546	351	65	64	-928	-929	-2483	286	992	1554
chr1	101377779	SLC30A7	ENST00000357650.4	1.43855	504	496	495	-635	-636	-776	8	1130	140
chr1	101379317	SLC30A7	ENST00000357650.4	1.53935	618	610	609	-521	-522	-662	8	1130	140
chr1	101387367	SLC30A7	ENST00000357650.4	1.71795	820	812	811	-319	-320	-460	8	1130	140
chr1	101456080	DPH5	ENST00000370109.3	1.8648	854	742	741	-116	-117	-461	112	857	344
chr1	101456107	DPH5	ENST00000370109.3	1.83333	827	715	714	-143	-144	-488	112	857	344
chr1	101456135	DPH5	ENST00000370109.3	1.8007	799	687	686	-171	-172	-516	112	857	344
chr1	107599578	PRMT6	ENST00000361318.5	1.0673	311	64	63	-887	-888	-2327	247	950	1439
chr1	107599664	PRMT6	ENST00000361318.5	1.15773	397	150	149	-801	-802	-2241	247	950	1439
chr1	107599861	PRMT6	ENST00000361318.5	1.36488	594	347	346	-604	-605	-2044	247	950	1439
chr1	107600288	PRMT6	ENST00000361318.5	1.81388	1021	774	773	-177	-178	-1617	247	950	1439
chr1	107600341	PRMT6	ENST00000361318.5	1.86961	1074	827	826	-124	-125	-1564	247	950	1439
chr1	108679297	SLC25A24	ENST00000370041.4	1.98402	1551	1355	1354	-22	-23	-1852	196	1376	1829
chr1	109241280	PRPF38B	ENST00000370021.1	1.21407	916	280	279	-1028	-1029	-2811	636	1307	1782
chr1	109241293	PRPF38B	ENST00000370021.1	1.22401	929	293	292	-1015	-1016	-2798	636	1307	1782
chr1	109241361	PRPF38B	ENST00000370021.1	1.27599	997	361	360	-947	-948	-2730	636	1307	1782
chr1	109241427	PRPF38B	ENST00000370021.1	1.32645	1063	427	426	-881	-882	-2664	636	1307	1782
chr1	109241436	PRPF38B	ENST00000370021.1	1.33333	1072	436	435	-872	-873	-2655	636	1307	1782
chr1	109241911	PRPF38B	ENST00000370021.1	1.44113	1213	577	576	-731	-732	-2514	636	1307	1782
chr1	109242219	PRPF38B	ENST00000370021.1	1.67661	1521	885	884	-423	-424	-2206	636	1307	1782
chr1	109242246	PRPF38B	ENST00000370021.1	1.69725	1548	912	911	-396	-397	-2179	636	1307	1782
chr1	109242340	PRPF38B	ENST00000370021.1	1.76911	1642	1006	1005	-302	-303	-2085	636	1307	1782
chr1	109242441	PRPF38B	ENST00000370021.1	1.84633	1743	1107	1106	-201	-202	-1984	636	1307	1782
chr1	109242529	PRPF38B	ENST00000370021.1	1.91361	1831	1195	1194	-113	-114	-1896	636	1307	1782
chr1	109315316	STXBP3	ENST00000370008.3	1.26307	517	468	467	-1311	-1312	-1960	49	1778	648
chr1	109315396	STXBP3	ENST00000370008.3	1.30804	597	548	547	-1231	-1232	-1880	49	1778	648
chr1	109350147	STXBP3	ENST00000370008.3	1.93311	1709	1660	1659	-119	-120	-768	49	1778	648
chr1	109439624	GPSM2	ENST00000264126.3	1.09489	690	195	194	-1860	-1861	-2341	495	2054	480
chr1	109440192	GPSM2	ENST00000264126.3	1.17372	852	357	356	-1698	-1699	-2179	495	2054	480
chr1	109440219	GPSM2	ENST00000264126.3	1.18686	879	384	383	-1671	-1672	-2152	495	2054	480
chr1	109440246	GPSM2	ENST00000264126.3	1.2	906	411	410	-1644	-1645	-2125	495	2054	480
chr1	109441345	GPSM2	ENST00000264126.3	1.31095	1134	639	638	-1416	-1417	-1897	495	2054	480
chr1	109441598	GPSM2	ENST00000264126.3	1.37908	1274	779	778	-1276	-1277	-1757	495	2054	480
chr1	109465160	GPSM2	ENST00000264126.3	1.7601	2057	1562	1561	-493	-494	-974	495	2054	480
chr1	109465169	GPSM2	ENST00000264126.3	1.76448	2066	1571	1570	-484	-485	-965	495	2054	480
chr1	109466747	GPSM2	ENST00000264126.3	1.8399	2221	1726	1725	-329	-330	-810	495	2054	480
chr1	109466765	GPSM2	ENST00000264126.3	1.84866	2239	1744	1743	-311	-312	-792	495	2054	480
chr1	109466788	GPSM2	ENST00000264126.3	1.85985	2262	1767	1766	-288	-289	-769	495	2054	480
chr1	109472458	GPSM2	ENST00000264126.3	1.94939	2446	1951	1950	-104	-105	-585	495	2054	480
chr1	109472480	GPSM2	ENST00000264126.3	1.9601	2468	1973	1972	-82	-83	-563	495	2054	480
chr1	109472549	GPSM2	ENST00000264126.3	1.99367	2537	2042	2041	-13	-14	-494	495	2054	480
chr1	109472556	GPSM2	ENST00000264126.3	1.99708	2544	2049	2048	-6	-7	-487	495	2054	480
chr1	109477321	CLCC1	ENST00000356970.2	1.98249	1734	1627	1626	-29	-30	-3068	107	1655	3038
chr1	109477542	CLCC1	ENST00000356970.2	1.84903	1513	1406	1405	-250	-251	-3289	107	1655	3038
chr1	109479795	CLCC1	ENST00000356970.2	1.77717	1394	1287	1286	-369	-370	-3408	107	1655	3038
chr1	109479941	CLCC1	ENST00000356970.2	1.68901	1248	1141	1140	-515	-516	-3554	107	1655	3038
chr1	109486513	CLCC1	ENST00000356970.2	1.30556	613	506	505	-1150	-1151	-4189	107	1655	3038
chr1	109486584	CLCC1	ENST00000356970.2	1.26268	542	435	434	-1221	-1222	-4260	107	1655	3038
chr1	109492462	CLCC1	ENST00000356970.2	1.12742	318	211	210	-1445	-1446	-4484	107	1655	3038
chr1	109492466	CLCC1	ENST00000356970.2	1.125	314	207	206	-1449	-1450	-4488	107	1655	3038
chr1	109492502	CLCC1	ENST00000356970.2	1.10326	278	171	170	-1485	-1486	-4524	107	1655	3038
chr1	109492947	CLCC1	ENST00000356970.2	1.06824	220	113	112	-1543	-1544	-4582	107	1655	3038
chr1	109514061	WDR47	ENST00000357672.3	1.99664	3042	2667	2666	-9	-10	-1221	375	2675	1211
chr1	109553841	WDR47	ENST00000357672.3	1.27765	1118	743	742	-1933	-1934	-3145	375	2675	1211
chr1	109772101	SARS	ENST00000234677.2	1.22913	428	354	353	-1191	-1192	-1423	74	1544	231
chr1	109773540	SARS	ENST00000234677.2	1.31586	562	488	487	-1057	-1058	-1289	74	1544	231
chr1	110050256	AMIGO1	ENST00000369862.1	1.86302	1662	1279	1278	-203	-204	-566	383	1481	362
chr1	110050660	AMIGO1	ENST00000369862.1	1.59042	1258	875	874	-607	-608	-970	383	1481	362
chr1	110050662	AMIGO1	ENST00000369862.1	1.58907	1256	873	872	-609	-610	-972	383	1481	362
chr1	110134776	GNAI3	ENST00000369851.4	1.92582	1095	986	985	-79	-80	-2110	109	1064	2030
chr1	110217430	GSTM2	ENST00000241337.4	1.95738	678	629	628	-28	-29	-478	49	656	449
chr1	110279708	GSTM3	ENST00000256594.3	1.97788	891	663	662	-15	-16	-3154	228	677	3138
chr1	110280094	GSTM3	ENST00000256594.3	1.83186	792	564	563	-114	-115	-3253	228	677	3138
chr1	110280767	GSTM3	ENST00000256594.3	1.46903	546	318	317	-360	-361	-3499	228	677	3138
chr1	110581915	STRIP1	ENST00000369795.3	1.1778	468	447	446	-2067	-2068	-2796	21	2513	728
chr1	110596460	STRIP1	ENST00000369795.3	1.97056	2461	2440	2439	-74	-75	-803	21	2513	728
chr1	110596474	STRIP1	ENST00000369795.3	1.97613	2475	2454	2453	-60	-61	-789	21	2513	728
chr1	110765858	KCNC4	ENST00000369787.3	1.49843	977	951	950	-957	-958	-2692	26	1907	1734
chr1	110766025	KCNC4	ENST00000369787.3	1.58595	1144	1118	1117	-790	-791	-2525	26	1907	1734
chr1	110766107	KCNC4	ENST00000369787.3	1.62893	1226	1200	1199	-708	-709	-2443	26	1907	1734
chr1	110882428	RBM15	ENST00000369784.3	1.13667	1300	401	400	-2533	-2534	-2943	899	2933	409
chr1	110882481	RBM15	ENST00000369784.3	1.15474	1353	454	453	-2480	-2481	-2890	899	2933	409
chr1	110882534	RBM15	ENST00000369784.3	1.1728	1406	507	506	-2427	-2428	-2837	899	2933	409
chr1	110882576	RBM15	ENST00000369784.3	1.18712	1448	549	548	-2385	-2386	-2795	899	2933	409
chr1	110882591	RBM15	ENST00000369784.3	1.19223	1463	564	563	-2370	-2371	-2780	899	2933	409
chr1	110883178	RBM15	ENST00000369784.3	1.3923	2050	1151	1150	-1783	-1784	-2193	899	2933	409
chr1	110883184	RBM15	ENST00000369784.3	1.39434	2056	1157	1156	-1777	-1778	-2187	899	2933	409
chr1	110883255	RBM15	ENST00000369784.3	1.41854	2127	1228	1227	-1706	-1707	-2116	899	2933	409
chr1	110883382	RBM15	ENST00000369784.3	1.46183	2254	1355	1354	-1579	-1580	-1989	899	2933	409
chr1	110883398	RBM15	ENST00000369784.3	1.46728	2270	1371	1370	-1563	-1564	-1973	899	2933	409
chr1	110883433	RBM15	ENST00000369784.3	1.47921	2305	1406	1405	-1528	-1529	-1938	899	2933	409
chr1	110883444	RBM15	ENST00000369784.3	1.48296	2316	1417	1416	-1517	-1518	-1927	899	2933	409
chr1	110883471	RBM15	ENST00000369784.3	1.49216	2343	1444	1443	-1490	-1491	-1900	899	2933	409
chr1	110883475	RBM15	ENST00000369784.3	1.49352	2347	1448	1447	-1486	-1487	-1896	899	2933	409
chr1	110883482	RBM15	ENST00000369784.3	1.49591	2354	1455	1454	-1479	-1480	-1889	899	2933	409
chr1	110883585	RBM15	ENST00000369784.3	1.53102	2457	1558	1557	-1376	-1377	-1786	899	2933	409
chr1	110883588	RBM15	ENST00000369784.3	1.53204	2460	1561	1560	-1373	-1374	-1783	899	2933	409
chr1	110883611	RBM15	ENST00000369784.3	1.53988	2483	1584	1583	-1350	-1351	-1760	899	2933	409
chr1	110883658	RBM15	ENST00000369784.3	1.5559	2530	1631	1630	-1303	-1304	-1713	899	2933	409
chr1	110883851	RBM15	ENST00000369784.3	1.62168	2723	1824	1823	-1110	-1111	-1520	899	2933	409
chr1	110883915	RBM15	ENST00000369784.3	1.64349	2787	1888	1887	-1046	-1047	-1456	899	2933	409
chr1	110884082	RBM15	ENST00000369784.3	1.70041	2954	2055	2054	-879	-880	-1289	899	2933	409
chr1	110884143	RBM15	ENST00000369784.3	1.7212	3015	2116	2115	-818	-819	-1228	899	2933	409
chr1	110884206	RBM15	ENST00000369784.3	1.74267	3078	2179	2178	-755	-756	-1165	899	2933	409
chr1	110884294	RBM15	ENST00000369784.3	1.77267	3166	2267	2266	-667	-668	-1077	899	2933	409
chr1	110884407	RBM15	ENST00000369784.3	1.81118	3279	2380	2379	-554	-555	-964	899	2933	409
chr1	110884564	RBM15	ENST00000369784.3	1.86469	3436	2537	2536	-397	-398	-807	899	2933	409
chr1	110884627	RBM15	ENST00000369784.3	1.88616	3499	2600	2599	-334	-335	-744	899	2933	409
chr1	110884660	RBM15	ENST00000369784.3	1.89741	3532	2633	2632	-301	-302	-711	899	2933	409
chr1	110884845	RBM15	ENST00000369784.3	1.96046	3717	2818	2817	-116	-117	-526	899	2933	409
chr1	110884880	RBM15	ENST00000369784.3	1.97239	3752	2853	2852	-81	-82	-491	899	2933	409
chr1	110888210	RBM15	ENST00000369784.3	1.99284	3812	2913	2912	-21	-22	-431	899	2933	409
chr1	111490590	LRIF1	ENST00000369763.4	1.9961	2691	2301	2300	-9	-10	-783	390	2309	773
chr1	111490649	LRIF1	ENST00000369763.4	1.97056	2632	2242	2241	-68	-69	-842	390	2309	773
chr1	111490670	LRIF1	ENST00000369763.4	1.96147	2611	2221	2220	-89	-90	-863	390	2309	773
chr1	111490696	LRIF1	ENST00000369763.4	1.95022	2585	2195	2194	-115	-116	-889	390	2309	773
chr1	111490734	LRIF1	ENST00000369763.4	1.93377	2547	2157	2156	-153	-154	-927	390	2309	773
chr1	111490745	LRIF1	ENST00000369763.4	1.929	2536	2146	2145	-164	-165	-938	390	2309	773
chr1	111490873	LRIF1	ENST00000369763.4	1.87359	2408	2018	2017	-292	-293	-1066	390	2309	773
chr1	111490879	LRIF1	ENST00000369763.4	1.871	2402	2012	2011	-298	-299	-1072	390	2309	773
chr1	111490909	LRIF1	ENST00000369763.4	1.85801	2372	1982	1981	-328	-329	-1102	390	2309	773
chr1	111490932	LRIF1	ENST00000369763.4	1.84805	2349	1959	1958	-351	-352	-1125	390	2309	773
chr1	111490938	LRIF1	ENST00000369763.4	1.84545	2343	1953	1952	-357	-358	-1131	390	2309	773
chr1	111490954	LRIF1	ENST00000369763.4	1.83853	2327	1937	1936	-373	-374	-1147	390	2309	773
chr1	111492575	LRIF1	ENST00000369763.4	1.76494	2157	1767	1766	-543	-544	-1317	390	2309	773
chr1	111506261	LRIF1	ENST00000369763.4	1.02165	440	50	49	-2260	-2261	-3034	390	2309	773
chr1	111661438	DRAM2	ENST00000286692.4	1.85144	1299	682	681	-119	-120	-946	617	800	826
chr1	111661442	DRAM2	ENST00000286692.4	1.84644	1295	678	677	-123	-124	-950	617	800	826
chr1	111661446	DRAM2	ENST00000286692.4	1.84145	1291	674	673	-127	-128	-954	617	800	826
chr1	111661451	DRAM2	ENST00000286692.4	1.83521	1286	669	668	-132	-133	-959	617	800	826
chr1	111667402	DRAM2	ENST00000286692.4	1.37578	918	301	300	-500	-501	-1327	617	800	826
chr1	111667468	DRAM2	ENST00000286692.4	1.29338	852	235	234	-566	-567	-1393	617	800	826
chr1	111690451	CEPT1	ENST00000357172.4	1.09193	269	115	114	-1136	-1137	-1928	154	1250	791
chr1	111690617	CEPT1	ENST00000357172.4	1.22462	435	281	280	-970	-971	-1762	154	1250	791
chr1	111690624	CEPT1	ENST00000357172.4	1.23022	442	288	287	-963	-964	-1755	154	1250	791
chr1	111690632	CEPT1	ENST00000357172.4	1.23661	450	296	295	-955	-956	-1747	154	1250	791
chr1	111690635	CEPT1	ENST00000357172.4	1.23901	453	299	298	-952	-953	-1744	154	1250	791
chr1	111690654	CEPT1	ENST00000357172.4	1.2542	472	318	317	-933	-934	-1725	154	1250	791
chr1	111690668	CEPT1	ENST00000357172.4	1.26539	486	332	331	-919	-920	-1711	154	1250	791
chr1	111702054	CEPT1	ENST00000357172.4	1.31335	546	392	391	-859	-860	-1651	154	1250	791
chr1	111703819	CEPT1	ENST00000357172.4	1.42366	684	530	529	-721	-722	-1513	154	1250	791
chr1	111703858	CEPT1	ENST00000357172.4	1.45484	723	569	568	-682	-683	-1474	154	1250	791
chr1	111724882	CEPT1	ENST00000357172.4	1.6299	942	788	787	-463	-464	-1255	154	1250	791
chr1	111724889	CEPT1	ENST00000357172.4	1.63549	949	795	794	-456	-457	-1248	154	1250	791
chr1	111983940	WDR77	ENST00000235090.5	1.91448	1147	941	940	-88	-89	-1428	206	1028	1339
chr1	111990085	WDR77	ENST00000235090.5	1.4033	621	415	414	-614	-615	-1954	206	1028	1339
chr1	111998795	ATP5F1	ENST00000369722.3	1.40337	916	311	310	-460	-461	-2239	605	770	1778
chr1	111998850	ATP5F1	ENST00000369722.3	1.47471	971	366	365	-405	-406	-2184	605	770	1778
chr1	112002205	ATP5F1	ENST00000369722.3	1.83009	1245	640	639	-131	-132	-1910	605	770	1778
chr1	112246047	RAP1A	ENST00000356415.1	1.49189	591	273	272	-282	-283	-994	318	554	711
chr1	112246091	RAP1A	ENST00000356415.1	1.57117	635	317	316	-238	-239	-950	318	554	711
chr1	112247089	RAP1A	ENST00000356415.1	1.80901	767	449	448	-106	-107	-818	318	554	711
chr1	112298671	DDX20	ENST00000369702.4	1.05051	744	125	124	-2350	-2351	-3467	619	2474	1116
chr1	112298792	DDX20	ENST00000369702.4	1.09939	865	246	245	-2229	-2230	-3346	619	2474	1116
chr1	112302142	DDX20	ENST00000369702.4	1.20889	1136	517	516	-1958	-1959	-3075	619	2474	1116
chr1	112303625	DDX20	ENST00000369702.4	1.33939	1459	840	839	-1635	-1636	-2752	619	2474	1116
chr1	112303643	DDX20	ENST00000369702.4	1.34667	1477	858	857	-1617	-1618	-2734	619	2474	1116
chr1	112303675	DDX20	ENST00000369702.4	1.3596	1509	890	889	-1585	-1586	-2702	619	2474	1116
chr1	112305353	DDX20	ENST00000369702.4	1.46828	1778	1159	1158	-1316	-1317	-2433	619	2474	1116
chr1	112305369	DDX20	ENST00000369702.4	1.47475	1794	1175	1174	-1300	-1301	-2417	619	2474	1116
chr1	112305373	DDX20	ENST00000369702.4	1.47636	1798	1179	1178	-1296	-1297	-2413	619	2474	1116
chr1	112308453	DDX20	ENST00000369702.4	1.56848	2026	1407	1406	-1068	-1069	-2185	619	2474	1116
chr1	112308496	DDX20	ENST00000369702.4	1.58586	2069	1450	1449	-1025	-1026	-2142	619	2474	1116
chr1	112308519	DDX20	ENST00000369702.4	1.59515	2092	1473	1472	-1002	-1003	-2119	619	2474	1116
chr1	112308533	DDX20	ENST00000369702.4	1.60081	2106	1487	1486	-988	-989	-2105	619	2474	1116
chr1	112308564	DDX20	ENST00000369702.4	1.61333	2137	1518	1517	-957	-958	-2074	619	2474	1116
chr1	112308569	DDX20	ENST00000369702.4	1.61535	2142	1523	1522	-952	-953	-2069	619	2474	1116
chr1	112308611	DDX20	ENST00000369702.4	1.63232	2184	1565	1564	-910	-911	-2027	619	2474	1116
chr1	112308638	DDX20	ENST00000369702.4	1.64323	2211	1592	1591	-883	-884	-2000	619	2474	1116
chr1	112308663	DDX20	ENST00000369702.4	1.65333	2236	1617	1616	-858	-859	-1975	619	2474	1116
chr1	112308719	DDX20	ENST00000369702.4	1.67596	2292	1673	1672	-802	-803	-1919	619	2474	1116
chr1	112308885	DDX20	ENST00000369702.4	1.74303	2458	1839	1838	-636	-637	-1753	619	2474	1116
chr1	112308894	DDX20	ENST00000369702.4	1.74667	2467	1848	1847	-627	-628	-1744	619	2474	1116
chr1	112308958	DDX20	ENST00000369702.4	1.77253	2531	1912	1911	-563	-564	-1680	619	2474	1116
chr1	112309023	DDX20	ENST00000369702.4	1.79879	2596	1977	1976	-498	-499	-1615	619	2474	1116
chr1	112309034	DDX20	ENST00000369702.4	1.80323	2607	1988	1987	-487	-488	-1604	619	2474	1116
chr1	112309065	DDX20	ENST00000369702.4	1.81576	2638	2019	2018	-456	-457	-1573	619	2474	1116
chr1	112309138	DDX20	ENST00000369702.4	1.84525	2711	2092	2091	-383	-384	-1500	619	2474	1116
chr1	112309144	DDX20	ENST00000369702.4	1.84768	2717	2098	2097	-377	-378	-1494	619	2474	1116
chr1	112309158	DDX20	ENST00000369702.4	1.85333	2731	2112	2111	-363	-364	-1480	619	2474	1116
chr1	112309289	DDX20	ENST00000369702.4	1.90626	2862	2243	2242	-232	-233	-1349	619	2474	1116
chr1	112309321	DDX20	ENST00000369702.4	1.91919	2894	2275	2274	-200	-201	-1317	619	2474	1116
chr1	112309333	DDX20	ENST00000369702.4	1.92404	2906	2287	2286	-188	-189	-1305	619	2474	1116
chr1	112309394	DDX20	ENST00000369702.4	1.94869	2967	2348	2347	-127	-128	-1244	619	2474	1116
chr1	112309507	DDX20	ENST00000369702.4	1.99434	3080	2461	2460	-14	-15	-1131	619	2474	1116
chr1	112991654	CTTNBP2NL	ENST00000271277.6	1.09896	414	190	189	-1730	-1731	-5482	224	1919	3751
chr1	112999106	CTTNBP2NL	ENST00000271277.6	1.51667	1216	992	991	-928	-929	-4680	224	1919	3751
chr1	112999919	CTTNBP2NL	ENST00000271277.6	1.9401	2029	1805	1804	-115	-116	-3867	224	1919	3751
chr1	113159493	ST7L	ENST00000343210.7	1.13789	305	230	229	-1438	-1439	-1560	75	1667	121
chr1	113197143	CAPZA1	ENST00000263168.3	1.32056	947	276	275	-585	-586	-2072	671	860	1486
chr1	113197167	CAPZA1	ENST00000263168.3	1.34843	971	300	299	-561	-562	-2048	671	860	1486
chr1	113245221	RHOC	ENST00000285735.2	1.63918	1581	372	371	-210	-211	-617	1209	581	406
chr1	113460178	SLC16A1	ENST00000369626.3	1.56554	1212	850	849	-653	-654	-2697	362	1502	2043
chr1	113460261	SLC16A1	ENST00000369626.3	1.51031	1129	767	766	-736	-737	-2780	362	1502	2043
chr1	113460310	SLC16A1	ENST00000369626.3	1.47771	1080	718	717	-785	-786	-2829	362	1502	2043
chr1	113460472	SLC16A1	ENST00000369626.3	1.36993	918	556	555	-947	-948	-2991	362	1502	2043
chr1	113471809	SLC16A1	ENST00000369626.3	1.08117	484	122	121	-1381	-1382	-3425	362	1502	2043
chr1	114243427	PHTF1	ENST00000369596.2	1.88075	2327	1876	1875	-254	-255	-757	451	2129	502
chr1	114248522	PHTF1	ENST00000369596.2	1.70516	1953	1502	1501	-628	-629	-1131	451	2129	502
chr1	114248561	PHTF1	ENST00000369596.2	1.68685	1914	1463	1462	-667	-668	-1170	451	2129	502
chr1	114248565	PHTF1	ENST00000369596.2	1.68498	1910	1459	1458	-671	-672	-1174	451	2129	502
chr1	114248610	PHTF1	ENST00000369596.2	1.66385	1865	1414	1413	-716	-717	-1219	451	2129	502
chr1	114248612	PHTF1	ENST00000369596.2	1.66291	1863	1412	1411	-718	-719	-1221	451	2129	502
chr1	114248639	PHTF1	ENST00000369596.2	1.65023	1836	1385	1384	-745	-746	-1248	451	2129	502
chr1	114248674	PHTF1	ENST00000369596.2	1.6338	1801	1350	1349	-780	-781	-1283	451	2129	502
chr1	114252918	PHTF1	ENST00000369596.2	1.50141	1519	1068	1067	-1062	-1063	-1565	451	2129	502
chr1	114254585	PHTF1	ENST00000369596.2	1.36385	1226	775	774	-1355	-1356	-1858	451	2129	502
chr1	114269109	PHTF1	ENST00000369596.2	1.12207	711	260	259	-1870	-1871	-2373	451	2129	502
chr1	114269156	PHTF1	ENST00000369596.2	1.1	664	213	212	-1917	-1918	-2420	451	2129	502
chr1	114308618	RSBN1	ENST00000261441.5	1.99336	2456	2393	2392	-16	-17	-4164	63	2408	4147
chr1	114308635	RSBN1	ENST00000261441.5	1.9863	2439	2376	2375	-33	-34	-4181	63	2408	4147
chr1	114340087	RSBN1	ENST00000261441.5	1.52927	1338	1275	1274	-1134	-1135	-5282	63	2408	4147
chr1	114340162	RSBN1	ENST00000261441.5	1.49813	1263	1200	1199	-1209	-1210	-5357	63	2408	4147
chr1	114340331	RSBN1	ENST00000261441.5	1.42798	1094	1031	1030	-1378	-1379	-5526	63	2408	4147
chr1	114340346	RSBN1	ENST00000261441.5	1.42175	1079	1016	1015	-1393	-1394	-5541	63	2408	4147
chr1	114442739	AP4B1	ENST00000256658.4	1.40586	1105	901	900	-1319	-1320	-1636	204	2219	316
chr1	114442780	AP4B1	ENST00000256658.4	1.38739	1064	860	859	-1360	-1361	-1677	204	2219	316
chr1	114442783	AP4B1	ENST00000256658.4	1.38604	1061	857	856	-1363	-1364	-1680	204	2219	316
chr1	114442832	AP4B1	ENST00000256658.4	1.36396	1012	808	807	-1412	-1413	-1729	204	2219	316
chr1	114442929	AP4B1	ENST00000256658.4	1.32027	915	711	710	-1509	-1510	-1826	204	2219	316
chr1	114442970	AP4B1	ENST00000256658.4	1.3018	874	670	669	-1550	-1551	-1867	204	2219	316
chr1	114442976	AP4B1	ENST00000256658.4	1.2991	868	664	663	-1556	-1557	-1873	204	2219	316
chr1	114442980	AP4B1	ENST00000256658.4	1.2973	864	660	659	-1560	-1561	-1877	204	2219	316
chr1	114445319	AP4B1	ENST00000256658.4	1.12568	483	279	278	-1941	-1942	-2258	204	2219	316
chr1	114448276	DCLRE1B	ENST00000369563.3	1.04253	513	68	67	-1531	-1532	-3426	445	1598	1894
chr1	114448297	DCLRE1B	ENST00000369563.3	1.05566	534	89	88	-1510	-1511	-3405	445	1598	1894
chr1	114448355	DCLRE1B	ENST00000369563.3	1.09193	592	147	146	-1452	-1453	-3347	445	1598	1894
chr1	114448369	DCLRE1B	ENST00000369563.3	1.10069	606	161	160	-1438	-1439	-3333	445	1598	1894
chr1	114448386	DCLRE1B	ENST00000369563.3	1.11132	623	178	177	-1421	-1422	-3316	445	1598	1894
chr1	114449687	DCLRE1B	ENST00000369563.3	1.16198	704	259	258	-1340	-1341	-3235	445	1598	1894
chr1	114449725	DCLRE1B	ENST00000369563.3	1.18574	742	297	296	-1302	-1303	-3197	445	1598	1894
chr1	114449740	DCLRE1B	ENST00000369563.3	1.19512	757	312	311	-1287	-1288	-3182	445	1598	1894
chr1	114450676	DCLRE1B	ENST00000369563.3	1.25078	846	401	400	-1198	-1199	-3093	445	1598	1894
chr1	114453876	DCLRE1B	ENST00000369563.3	1.41401	1107	662	661	-937	-938	-2832	445	1598	1894
chr1	114453966	DCLRE1B	ENST00000369563.3	1.47029	1197	752	751	-847	-848	-2742	445	1598	1894
chr1	114454000	DCLRE1B	ENST00000369563.3	1.49156	1231	786	785	-813	-814	-2708	445	1598	1894
chr1	114454021	DCLRE1B	ENST00000369563.3	1.50469	1252	807	806	-792	-793	-2687	445	1598	1894
chr1	114454035	DCLRE1B	ENST00000369563.3	1.51345	1266	821	820	-778	-779	-2673	445	1598	1894
chr1	114454039	DCLRE1B	ENST00000369563.3	1.51595	1270	825	824	-774	-775	-2669	445	1598	1894
chr1	114454047	DCLRE1B	ENST00000369563.3	1.52095	1278	833	832	-766	-767	-2661	445	1598	1894
chr1	114454051	DCLRE1B	ENST00000369563.3	1.52345	1282	837	836	-762	-763	-2657	445	1598	1894
chr1	114454072	DCLRE1B	ENST00000369563.3	1.53659	1303	858	857	-741	-742	-2636	445	1598	1894
chr1	114454184	DCLRE1B	ENST00000369563.3	1.60663	1415	970	969	-629	-630	-2524	445	1598	1894
chr1	114454192	DCLRE1B	ENST00000369563.3	1.61163	1423	978	977	-621	-622	-2516	445	1598	1894
chr1	114454214	DCLRE1B	ENST00000369563.3	1.62539	1445	1000	999	-599	-600	-2494	445	1598	1894
chr1	114454225	DCLRE1B	ENST00000369563.3	1.63227	1456	1011	1010	-588	-589	-2483	445	1598	1894
chr1	114454301	DCLRE1B	ENST00000369563.3	1.6798	1532	1087	1086	-512	-513	-2407	445	1598	1894
chr1	114454315	DCLRE1B	ENST00000369563.3	1.68856	1546	1101	1100	-498	-499	-2393	445	1598	1894
chr1	114454346	DCLRE1B	ENST00000369563.3	1.70794	1577	1132	1131	-467	-468	-2362	445	1598	1894
chr1	114454482	DCLRE1B	ENST00000369563.3	1.793	1713	1268	1267	-331	-332	-2226	445	1598	1894
chr1	114454491	DCLRE1B	ENST00000369563.3	1.79862	1722	1277	1276	-322	-323	-2217	445	1598	1894
chr1	114454509	DCLRE1B	ENST00000369563.3	1.80988	1740	1295	1294	-304	-305	-2199	445	1598	1894
chr1	114454527	DCLRE1B	ENST00000369563.3	1.82114	1758	1313	1312	-286	-287	-2181	445	1598	1894
chr1	114454698	DCLRE1B	ENST00000369563.3	1.92808	1929	1484	1483	-115	-116	-2010	445	1598	1894
chr1	114454718	DCLRE1B	ENST00000369563.3	1.94059	1949	1504	1503	-95	-96	-1990	445	1598	1894
chr1	114454780	DCLRE1B	ENST00000369563.3	1.97936	2011	1566	1565	-33	-34	-1928	445	1598	1894
chr1	114942130	TRIM33	ENST00000358465.2	1.90691	3152	3069	3068	-315	-316	-5186	83	3383	4870
chr1	115110757	BCAS2	ENST00000369541.3	1.99115	719	672	671	-6	-7	-579	47	677	572
chr1	115110778	BCAS2	ENST00000369541.3	1.96018	698	651	650	-27	-28	-600	47	677	572
chr1	115110792	BCAS2	ENST00000369541.3	1.93953	684	637	636	-41	-42	-614	47	677	572
chr1	115110840	BCAS2	ENST00000369541.3	1.86873	636	589	588	-89	-90	-662	47	677	572
chr1	115118245	BCAS2	ENST00000369541.3	1.56785	432	385	384	-293	-294	-866	47	677	572
chr1	115167869	DENND2C	ENST00000393274.1	1.26444	1362	737	736	-2050	-2051	-4800	625	2786	2749
chr1	115167873	DENND2C	ENST00000393274.1	1.26301	1358	733	732	-2054	-2055	-4804	625	2786	2749
chr1	115167938	DENND2C	ENST00000393274.1	1.23968	1293	668	667	-2119	-2120	-4869	625	2786	2749
chr1	115168043	DENND2C	ENST00000393274.1	1.20201	1188	563	562	-2224	-2225	-4974	625	2786	2749
chr1	115168161	DENND2C	ENST00000393274.1	1.15967	1070	445	444	-2342	-2343	-5092	625	2786	2749
chr1	115168180	DENND2C	ENST00000393274.1	1.15285	1051	426	425	-2361	-2362	-5111	625	2786	2749
chr1	115168447	DENND2C	ENST00000393274.1	1.05705	784	159	158	-2628	-2629	-5378	625	2786	2749
chr1	115252243	NRAS	ENST00000369535.4	1.69649	650	397	396	-173	-174	-3798	253	569	3624
chr1	115252292	NRAS	ENST00000369535.4	1.61053	601	348	347	-222	-223	-3847	253	569	3624
chr1	115263222	CSDE1	ENST00000339438.6	1.82335	2342	1897	1896	-407	-408	-1663	445	2303	1255
chr1	115268868	CSDE1	ENST00000339438.6	1.65582	1956	1511	1510	-793	-794	-2049	445	2303	1255
chr1	115268958	CSDE1	ENST00000339438.6	1.61675	1866	1421	1420	-883	-884	-2139	445	2303	1255
chr1	115268987	CSDE1	ENST00000339438.6	1.60417	1837	1392	1391	-912	-913	-2168	445	2303	1255
chr1	115269662	CSDE1	ENST00000339438.6	1.56988	1758	1313	1312	-991	-992	-2247	445	2303	1255
chr1	115272950	CSDE1	ENST00000339438.6	1.51736	1637	1192	1191	-1112	-1113	-2368	445	2303	1255
chr1	115272974	CSDE1	ENST00000339438.6	1.50694	1613	1168	1167	-1136	-1137	-2392	445	2303	1255
chr1	115273182	CSDE1	ENST00000339438.6	1.45356	1490	1045	1044	-1259	-1260	-2515	445	2303	1255
chr1	115275244	CSDE1	ENST00000339438.6	1.40712	1383	938	937	-1366	-1367	-2622	445	2303	1255
chr1	115275405	CSDE1	ENST00000339438.6	1.33724	1222	777	776	-1527	-1528	-2783	445	2303	1255
chr1	115275419	CSDE1	ENST00000339438.6	1.33116	1208	763	762	-1541	-1542	-2797	445	2303	1255
chr1	115276416	CSDE1	ENST00000339438.6	1.29557	1126	681	680	-1623	-1624	-2879	445	2303	1255
chr1	115276435	CSDE1	ENST00000339438.6	1.28733	1107	662	661	-1642	-1643	-2898	445	2303	1255
chr1	115276685	CSDE1	ENST00000339438.6	1.23568	988	543	542	-1761	-1762	-3017	445	2303	1255
chr1	115280598	CSDE1	ENST00000339438.6	1.12804	740	295	294	-2009	-2010	-3265	445	2303	1255
chr1	115280619	CSDE1	ENST00000339438.6	1.11892	719	274	273	-2030	-2031	-3286	445	2303	1255
chr1	115280634	CSDE1	ENST00000339438.6	1.11241	704	259	258	-2045	-2046	-3301	445	2303	1255
chr1	115280657	CSDE1	ENST00000339438.6	1.10243	681	236	235	-2068	-2069	-3324	445	2303	1255
chr1	115280661	CSDE1	ENST00000339438.6	1.10069	677	232	231	-2072	-2073	-3328	445	2303	1255
chr1	115280665	CSDE1	ENST00000339438.6	1.09896	673	228	227	-2076	-2077	-3332	445	2303	1255
chr1	115282376	CSDE1	ENST00000339438.6	1.05903	581	136	135	-2168	-2169	-3424	445	2303	1255
chr1	115282401	CSDE1	ENST00000339438.6	1.04818	556	111	110	-2193	-2194	-3449	445	2303	1255
chr1	115282432	CSDE1	ENST00000339438.6	1.03472	525	80	79	-2224	-2225	-3480	445	2303	1255
chr1	115282475	CSDE1	ENST00000339438.6	1.01606	482	37	36	-2267	-2268	-3523	445	2303	1255
chr1	115282482	CSDE1	ENST00000339438.6	1.01302	475	30	29	-2274	-2275	-3530	445	2303	1255
chr1	115316925	SIKE1	ENST00000369528.5	1.94811	680	603	602	-33	-34	-4825	77	635	4791
chr1	115321846	SIKE1	ENST00000369528.5	1.52987	414	337	336	-299	-300	-5091	77	635	4791
chr1	116194070	VANGL1	ENST00000310260.3	1.02286	250	36	35	-1539	-1540	-2014	214	1574	474
chr1	116194101	VANGL1	ENST00000310260.3	1.04254	281	67	66	-1508	-1509	-1983	214	1574	474
chr1	116206432	VANGL1	ENST00000310260.3	1.2254	569	355	354	-1220	-1221	-1695	214	1574	474
chr1	116206611	VANGL1	ENST00000310260.3	1.33905	748	534	533	-1041	-1042	-1516	214	1574	474
chr1	116206660	VANGL1	ENST00000310260.3	1.37016	797	583	582	-992	-993	-1467	214	1574	474
chr1	116206725	VANGL1	ENST00000310260.3	1.41143	862	648	647	-927	-928	-1402	214	1574	474
chr1	116206773	VANGL1	ENST00000310260.3	1.4419	910	696	695	-879	-880	-1354	214	1574	474
chr1	116206872	VANGL1	ENST00000310260.3	1.50476	1009	795	794	-780	-781	-1255	214	1574	474
chr1	116926710	ATP1A1	ENST00000295598.5	1.02832	338	87	86	-2985	-2986	-3315	251	3071	329
chr1	116930036	ATP1A1	ENST00000295598.5	1.10091	561	310	309	-2762	-2763	-3092	251	3071	329
chr1	116930107	ATP1A1	ENST00000295598.5	1.12402	632	381	380	-2691	-2692	-3021	251	3071	329
chr1	116931364	ATP1A1	ENST00000295598.5	1.19727	857	606	605	-2466	-2467	-2796	251	3071	329
chr1	116932891	ATP1A1	ENST00000295598.5	1.35156	1331	1080	1079	-1992	-1993	-2322	251	3071	329
chr1	116932950	ATP1A1	ENST00000295598.5	1.37077	1390	1139	1138	-1933	-1934	-2263	251	3071	329
[truncated: 29,545 more rows]

## Sheet: YTH-E_m6A_sites_UTR 3terminal
chr	coord	gene_name	refseqID	rel_location	utr5_st	utr5_end	cds_st	cds_end	utr3_st	utr3_end	utr5_size	cds_size	utr3_size
chr1	879587	SAMD11	ENST00000342066.3	2.12796	2182	2100	2099	54	53	-368	82	2045	421
chr1	900674	KLHL17	ENST00000338591.3	2.19656	2138	2032	2031	103	102	-421	106	1928	523
chr1	1017658	C1orf159	ENST00000294576.5	2.57209	2081	1650	1649	615	614	-460	431	1034	1074
chr1	1017742	C1orf159	ENST00000294576.5	2.49395	1997	1566	1565	531	530	-544	431	1034	1074
chr1	1017849	C1orf159	ENST00000294576.5	2.39442	1890	1459	1458	424	423	-651	431	1034	1074
chr1	1152462	SDF4	ENST00000263741.7	2.79567	1927	1635	1634	588	587	-151	292	1046	738
chr1	1152512	SDF4	ENST00000263741.7	2.72801	1877	1585	1584	538	537	-201	292	1046	738
chr1	1153042	SDF4	ENST00000263741.7	2.01083	1347	1055	1054	8	7	-731	292	1046	738
chr1	1168890	B3GALT6	ENST00000379198.2	2.13649	1261	1232	1231	242	241	-1531	29	989	1772
chr1	1168908	B3GALT6	ENST00000379198.2	2.14664	1279	1250	1249	260	259	-1513	29	989	1772
chr1	1168960	B3GALT6	ENST00000379198.2	2.17597	1331	1302	1301	312	311	-1461	29	989	1772
chr1	1168964	B3GALT6	ENST00000379198.2	2.17823	1335	1306	1305	316	315	-1457	29	989	1772
chr1	1168975	B3GALT6	ENST00000379198.2	2.18443	1346	1317	1316	327	326	-1446	29	989	1772
chr1	1168994	B3GALT6	ENST00000379198.2	2.19515	1365	1336	1335	346	345	-1427	29	989	1772
chr1	1168997	B3GALT6	ENST00000379198.2	2.19684	1368	1339	1338	349	348	-1424	29	989	1772
chr1	1169024	B3GALT6	ENST00000379198.2	2.21207	1395	1366	1365	376	375	-1397	29	989	1772
chr1	1169035	B3GALT6	ENST00000379198.2	2.21827	1406	1377	1376	387	386	-1386	29	989	1772
chr1	1169052	B3GALT6	ENST00000379198.2	2.22786	1423	1394	1393	404	403	-1369	29	989	1772
chr1	1189724	UBE2J2	ENST00000347370.2	2.66641	1956	1483	1482	859	858	-430	473	623	1288
chr1	1189814	UBE2J2	ENST00000347370.2	2.59659	1866	1393	1392	769	768	-520	473	623	1288
chr1	1189816	UBE2J2	ENST00000347370.2	2.59503	1864	1391	1390	767	766	-522	473	623	1288
chr1	1190253	UBE2J2	ENST00000347370.2	2.25601	1427	954	953	330	329	-959	473	623	1288
chr1	1190267	UBE2J2	ENST00000347370.2	2.24515	1413	940	939	316	315	-973	473	623	1288
chr1	1190287	UBE2J2	ENST00000347370.2	2.22964	1393	920	919	296	295	-993	473	623	1288
chr1	1190317	UBE2J2	ENST00000347370.2	2.20636	1363	890	889	266	265	-1023	473	623	1288
chr1	1190326	UBE2J2	ENST00000347370.2	2.19938	1354	881	880	257	256	-1032	473	623	1288
chr1	1190425	UBE2J2	ENST00000347370.2	2.12258	1255	782	781	158	157	-1131	473	623	1288
chr1	1190566	UBE2J2	ENST00000347370.2	2.01319	1114	641	640	17	16	-1272	473	623	1288
chr1	1228173	ACAP3	ENST00000353662.3	2.65339	3250	3051	3050	771	770	-409	199	2279	1179
chr1	1246956	PUSL1	ENST00000379031.5	2.66107	1185	1109	1108	197	196	-101	76	911	297
chr1	1246958	PUSL1	ENST00000379031.5	2.66779	1187	1111	1110	199	198	-99	76	911	297
chr1	1246972	PUSL1	ENST00000379031.5	2.71477	1201	1125	1124	213	212	-85	76	911	297
chr1	1246998	PUSL1	ENST00000379031.5	2.80201	1227	1151	1150	239	238	-59	76	911	297
chr1	1247049	PUSL1	ENST00000379031.5	2.97315	1278	1202	1201	290	289	-8	76	911	297
chr1	1271151	DVL1	ENST00000378888.5	2.42841	2743	2459	2458	371	370	-495	284	2087	865
chr1	1322106	CCNL2	ENST00000400809.3	2.68614	2073	2068	2067	505	504	-231	5	1562	735
chr1	1322462	CCNL2	ENST00000400809.3	2.20245	1717	1712	1711	149	148	-587	5	1562	735
chr1	1336122	RP4-758J18.2	ENST00000444362.1	2.10378	442	418	417	151	150	-1304	24	266	1454
chr1	1336162	RP4-758J18.2	ENST00000444362.1	2.13127	482	458	457	191	190	-1264	24	266	1454
chr1	1336207	RP4-758J18.2	ENST00000444362.1	2.1622	527	503	502	236	235	-1219	24	266	1454
chr1	1336232	RP4-758J18.2	ENST00000444362.1	2.17938	552	528	527	261	260	-1194	24	266	1454
chr1	1336249	RP4-758J18.2	ENST00000444362.1	2.19107	569	545	544	278	277	-1177	24	266	1454
chr1	1336278	RP4-758J18.2	ENST00000444362.1	2.211	598	574	573	307	306	-1148	24	266	1454
chr1	1336292	RP4-758J18.2	ENST00000444362.1	2.22062	612	588	587	321	320	-1134	24	266	1454
chr1	1336303	RP4-758J18.2	ENST00000444362.1	2.22818	623	599	598	332	331	-1123	24	266	1454
chr1	1336305	RP4-758J18.2	ENST00000444362.1	2.22955	625	601	600	334	333	-1121	24	266	1454
chr1	1336313	RP4-758J18.2	ENST00000444362.1	2.23505	633	609	608	342	341	-1113	24	266	1454
chr1	1336317	RP4-758J18.2	ENST00000444362.1	2.2378	637	613	612	346	345	-1109	24	266	1454
chr1	1336446	RP4-758J18.2	ENST00000444362.1	2.32646	766	742	741	475	474	-980	24	266	1454
chr1	1336664	RP4-758J18.2	ENST00000444362.1	2.47629	984	960	959	693	692	-762	24	266	1454
chr1	1337059	RP4-758J18.2	ENST00000444362.1	2.74777	1379	1355	1354	1088	1087	-367	24	266	1454
chr1	1337126	RP4-758J18.2	ENST00000444362.1	2.79381	1446	1422	1421	1155	1154	-300	24	266	1454
chr1	1337288	RP4-758J18.2	ENST00000444362.1	2.90515	1608	1584	1583	1317	1316	-138	24	266	1454
chr1	1337307	RP4-758J18.2	ENST00000444362.1	2.91821	1627	1603	1602	1336	1335	-119	24	266	1454
chr1	1337313	RP4-758J18.2	ENST00000444362.1	2.92234	1633	1609	1608	1342	1341	-113	24	266	1454
chr1	1337320	RP4-758J18.2	ENST00000444362.1	2.92715	1640	1616	1615	1349	1348	-106	24	266	1454
chr1	1337372	MRPL20	ENST00000344843.7	2.52	636	541	540	91	90	-84	95	449	174
chr1	1477074	SSU72	ENST00000291386.3	2.94656	1268	957	956	372	371	-21	311	584	392
chr1	1477198	SSU72	ENST00000291386.3	2.63104	1144	833	832	248	247	-145	311	584	392
chr1	1477262	SSU72	ENST00000291386.3	2.46819	1080	769	768	184	183	-209	311	584	392
chr1	1477277	SSU72	ENST00000291386.3	2.43003	1065	754	753	169	168	-224	311	584	392
chr1	1477294	SSU72	ENST00000291386.3	2.38677	1048	737	736	152	151	-241	311	584	392
chr1	1477367	SSU72	ENST00000291386.3	2.20102	975	664	663	79	78	-314	311	584	392
chr1	1477392	SSU72	ENST00000291386.3	2.1374	950	639	638	54	53	-339	311	584	392
chr1	1477402	SSU72	ENST00000291386.3	2.11196	940	629	628	44	43	-349	311	584	392
chr1	1533567	C1orf233	ENST00000422725.1	2.86772	1909	1829	1828	1148	1147	-175	80	680	1322
chr1	1533613	C1orf233	ENST00000422725.1	2.83296	1863	1783	1782	1102	1101	-221	80	680	1322
chr1	1533792	C1orf233	ENST00000422725.1	2.69766	1684	1604	1603	923	922	-400	80	680	1322
chr1	1533861	C1orf233	ENST00000422725.1	2.6455	1615	1535	1534	854	853	-469	80	680	1322
chr1	1533880	C1orf233	ENST00000422725.1	2.63114	1596	1516	1515	835	834	-488	80	680	1322
chr1	1534125	C1orf233	ENST00000422725.1	2.44596	1351	1271	1270	590	589	-733	80	680	1322
chr1	1534214	C1orf233	ENST00000422725.1	2.37868	1262	1182	1181	501	500	-822	80	680	1322
chr1	1534396	C1orf233	ENST00000422725.1	2.24112	1080	1000	999	319	318	-1004	80	680	1322
chr1	1534548	C1orf233	ENST00000422725.1	2.12623	928	848	847	167	166	-1156	80	680	1322
chr1	1534583	C1orf233	ENST00000422725.1	2.09977	893	813	812	132	131	-1191	80	680	1322
chr1	1593585	SLC35E2B	ENST00000234800.6	2.84933	5280	4854	4853	3636	3635	-645	426	1217	4280
chr1	1593663	SLC35E2B	ENST00000234800.6	2.83111	5202	4776	4775	3558	3557	-723	426	1217	4280
chr1	1593684	SLC35E2B	ENST00000234800.6	2.82621	5181	4755	4754	3537	3536	-744	426	1217	4280
chr1	1716894	GNB1	ENST00000378609.4	2.90694	2962	2631	2630	1608	1607	-165	331	1022	1772
chr1	1716959	GNB1	ENST00000378609.4	2.87028	2897	2566	2565	1543	1542	-230	331	1022	1772
chr1	1716964	GNB1	ENST00000378609.4	2.86746	2892	2561	2560	1538	1537	-235	331	1022	1772
chr1	1717043	GNB1	ENST00000378609.4	2.8229	2813	2482	2481	1459	1458	-314	331	1022	1772
chr1	2116395	C1orf86	ENST00000400919.3	2.4025	1834	766	765	322	321	-478	1068	443	799
chr1	2116406	C1orf86	ENST00000400919.3	2.38875	1823	755	754	311	310	-489	1068	443	799
chr1	2116560	PRKCZ	ENST00000400920.1	2.29167	1736	1342	1341	112	111	-272	394	1229	383
chr1	2239697	SKI	ENST00000378536.4	2.44514	3751	3680	3679	1493	1492	-1861	71	2186	3353
chr1	2334503	RER1	ENST00000378512.1	2.10079	716	641	640	77	76	-687	75	563	763
chr1	2334505	RER1	ENST00000378512.1	2.1034	718	643	642	79	78	-685	75	563	763
chr1	2334599	RER1	ENST00000378512.1	2.22644	812	737	736	173	172	-591	75	563	763
chr1	2334686	RER1	ENST00000378512.1	2.34031	899	824	823	260	259	-504	75	563	763
chr1	2334756	RER1	ENST00000378512.1	2.43194	969	894	893	330	329	-434	75	563	763
chr1	2334762	RER1	ENST00000378512.1	2.43979	975	900	899	336	335	-428	75	563	763
chr1	2334768	RER1	ENST00000378512.1	2.44764	981	906	905	342	341	-422	75	563	763
chr1	2334781	RER1	ENST00000378512.1	2.46466	994	919	918	355	354	-409	75	563	763
chr1	2334785	RER1	ENST00000378512.1	2.4699	998	923	922	359	358	-405	75	563	763
chr1	2335019	RER1	ENST00000378512.1	2.77618	1232	1157	1156	593	592	-171	75	563	763
chr1	2335037	RER1	ENST00000378512.1	2.79974	1250	1175	1174	611	610	-153	75	563	763
chr1	2335056	RER1	ENST00000378512.1	2.82461	1269	1194	1193	630	629	-134	75	563	763
chr1	2335069	RER1	ENST00000378512.1	2.84162	1282	1207	1206	643	642	-121	75	563	763
chr1	2335070	RER1	ENST00000378512.1	2.84293	1283	1208	1207	644	643	-120	75	563	763
chr1	2335076	RER1	ENST00000378512.1	2.85079	1289	1214	1213	650	649	-114	75	563	763
chr1	2335107	RER1	ENST00000378512.1	2.89136	1320	1245	1244	681	680	-83	75	563	763
chr1	2335111	RER1	ENST00000378512.1	2.8966	1324	1249	1248	685	684	-79	75	563	763
chr1	2335126	RER1	ENST00000378512.1	2.91623	1339	1264	1263	700	699	-64	75	563	763
chr1	2335133	RER1	ENST00000378512.1	2.92539	1346	1271	1270	707	706	-57	75	563	763
chr1	2336835	PEX10	ENST00000288774.3	2.38184	1438	1411	1410	370	369	-599	27	1040	968
chr1	2336863	PEX10	ENST00000288774.3	2.35294	1410	1383	1382	342	341	-627	27	1040	968
chr1	2336897	PEX10	ENST00000288774.3	2.31785	1376	1349	1348	308	307	-661	27	1040	968
chr1	2336933	PEX10	ENST00000288774.3	2.2807	1340	1313	1312	272	271	-697	27	1040	968
chr1	2337053	PEX10	ENST00000288774.3	2.15686	1220	1193	1192	152	151	-817	27	1040	968
chr1	2337078	PEX10	ENST00000288774.3	2.13106	1195	1168	1167	127	126	-842	27	1040	968
chr1	2337102	PEX10	ENST00000288774.3	2.1063	1171	1144	1143	103	102	-866	27	1040	968
chr1	2440085	PANK4	ENST00000378466.3	2.64013	2535	2523	2522	201	200	-113	12	2321	313
chr1	2440093	PANK4	ENST00000378466.3	2.61465	2527	2515	2514	193	192	-121	12	2321	313
chr1	2440104	PANK4	ENST00000378466.3	2.57962	2516	2504	2503	182	181	-132	12	2321	313
chr1	2440128	PANK4	ENST00000378466.3	2.50318	2492	2480	2479	158	157	-156	12	2321	313
chr1	2440167	PANK4	ENST00000378466.3	2.37898	2453	2441	2440	119	118	-195	12	2321	313
chr1	2440178	PANK4	ENST00000378466.3	2.34395	2442	2430	2429	108	107	-206	12	2321	313
chr1	2440202	PANK4	ENST00000378466.3	2.26752	2418	2406	2405	84	83	-230	12	2321	313
chr1	2440210	PANK4	ENST00000378466.3	2.24204	2410	2398	2397	76	75	-238	12	2321	313
chr1	2440217	PANK4	ENST00000378466.3	2.21975	2403	2391	2390	69	68	-245	12	2321	313
chr1	2440225	PANK4	ENST00000378466.3	2.19427	2395	2383	2382	61	60	-253	12	2321	313
chr1	2440228	PANK4	ENST00000378466.3	2.18471	2392	2380	2379	58	57	-256	12	2321	313
chr1	2440231	PANK4	ENST00000378466.3	2.17516	2389	2377	2376	55	54	-259	12	2321	313
chr1	2440252	PANK4	ENST00000378466.3	2.10828	2368	2356	2355	34	33	-280	12	2321	313
chr1	2440254	PANK4	ENST00000378466.3	2.10191	2366	2354	2353	32	31	-282	12	2321	313
chr1	2440262	PANK4	ENST00000378466.3	2.07643	2358	2346	2345	24	23	-290	12	2321	313
chr1	2522095	FAM213B	ENST00000378424.4	2.60497	1953	1938	1937	1242	1241	-811	15	695	2052
chr1	2522193	FAM213B	ENST00000378424.4	2.6527	2051	2036	2035	1340	1339	-713	15	695	2052
chr1	3547885	WRAP73	ENST00000378322.3	2.12203	1443	1385	1384	77	76	-554	58	1307	630
chr1	3547917	WRAP73	ENST00000378322.3	2.07132	1411	1353	1352	45	44	-586	58	1307	630
chr1	3650000	TP73	ENST00000346387.4	2.43325	2089	1980	1979	357	356	-467	109	1622	823
chr1	3696946	LRRC47	ENST00000378251.1	2.81336	2485	2458	2457	706	705	-162	27	1751	867
chr1	3697077	LRRC47	ENST00000378251.1	2.66244	2354	2327	2326	575	574	-293	27	1751	867
chr1	3697569	LRRC47	ENST00000378251.1	2.09562	1862	1835	1834	83	82	-785	27	1751	867
chr1	3805783	C1orf174	ENST00000361605.3	2.88743	1571	1473	1472	741	740	-94	98	731	834
chr1	3806337	C1orf174	ENST00000361605.3	2.22395	1017	919	918	187	186	-648	98	731	834
chr1	3806343	C1orf174	ENST00000361605.3	2.21677	1011	913	912	181	180	-654	98	731	834
chr1	3806396	C1orf174	ENST00000361605.3	2.15329	958	860	859	128	127	-707	98	731	834
chr1	3806401	C1orf174	ENST00000361605.3	2.14731	953	855	854	123	122	-712	98	731	834
chr1	3806423	C1orf174	ENST00000361605.3	2.12096	931	833	832	101	100	-734	98	731	834
chr1	3806488	C1orf174	ENST00000361605.3	2.04311	866	768	767	36	35	-799	98	731	834
chr1	3806515	C1orf174	ENST00000361605.3	2.01078	839	741	740	9	8	-826	98	731	834
chr1	6245209	RPL22	ENST00000234875.4	2.92191	1948	1910	1909	1523	1522	-129	38	386	1651
chr1	6245230	RPL22	ENST00000234875.4	2.9092	1927	1889	1888	1502	1501	-150	38	386	1651
chr1	6245418	RPL22	ENST00000234875.4	2.7954	1739	1701	1700	1314	1313	-338	38	386	1651
chr1	6246051	RPL22	ENST00000234875.4	2.41223	1106	1068	1067	681	680	-971	38	386	1651
chr1	6246078	RPL22	ENST00000234875.4	2.39588	1079	1041	1040	654	653	-998	38	386	1651
chr1	6246244	RPL22	ENST00000234875.4	2.2954	913	875	874	488	487	-1164	38	386	1651
chr1	6246330	RPL22	ENST00000234875.4	2.24334	827	789	788	402	401	-1250	38	386	1651
chr1	6246334	RPL22	ENST00000234875.4	2.24092	823	785	784	398	397	-1254	38	386	1651
chr1	6246374	RPL22	ENST00000234875.4	2.21671	783	745	744	358	357	-1294	38	386	1651
chr1	6281362	ICMT	ENST00000343813.5	2.97196	4661	4633	4632	3778	3777	-109	28	854	3886
chr1	6281365	ICMT	ENST00000343813.5	2.97119	4658	4630	4629	3775	3774	-112	28	854	3886
chr1	6281378	ICMT	ENST00000343813.5	2.96784	4645	4617	4616	3762	3761	-125	28	854	3886
chr1	6281383	ICMT	ENST00000343813.5	2.96656	4640	4612	4611	3757	3756	-130	28	854	3886
chr1	6281481	ICMT	ENST00000343813.5	2.94134	4542	4514	4513	3659	3658	-228	28	854	3886
chr1	6281483	ICMT	ENST00000343813.5	2.94083	4540	4512	4511	3657	3656	-230	28	854	3886
chr1	6281595	ICMT	ENST00000343813.5	2.91201	4428	4400	4399	3545	3544	-342	28	854	3886
chr1	6281823	ICMT	ENST00000343813.5	2.85336	4200	4172	4171	3317	3316	-570	28	854	3886
chr1	6281921	ICMT	ENST00000343813.5	2.82815	4102	4074	4073	3219	3218	-668	28	854	3886
chr1	6281937	ICMT	ENST00000343813.5	2.82403	4086	4058	4057	3203	3202	-684	28	854	3886
chr1	6282050	ICMT	ENST00000343813.5	2.79496	3973	3945	3944	3090	3089	-797	28	854	3886
chr1	6282061	ICMT	ENST00000343813.5	2.79213	3962	3934	3933	3079	3078	-808	28	854	3886
chr1	6282158	ICMT	ENST00000343813.5	2.76717	3865	3837	3836	2982	2981	-905	28	854	3886
chr1	6282179	ICMT	ENST00000343813.5	2.76177	3844	3816	3815	2961	2960	-926	28	854	3886
chr1	6282190	ICMT	ENST00000343813.5	2.75894	3833	3805	3804	2950	2949	-937	28	854	3886
chr1	6283562	ICMT	ENST00000343813.5	2.40597	2461	2433	2432	1578	1577	-2309	28	854	3886
chr1	6283632	ICMT	ENST00000343813.5	2.38796	2391	2363	2362	1508	1507	-2379	28	854	3886
chr1	6283648	ICMT	ENST00000343813.5	2.38384	2375	2347	2346	1492	1491	-2395	28	854	3886
chr1	6283940	ICMT	ENST00000343813.5	2.30872	2083	2055	2054	1200	1199	-2687	28	854	3886
chr1	6284072	ICMT	ENST00000343813.5	2.27476	1951	1923	1922	1068	1067	-2819	28	854	3886
chr1	6284211	ICMT	ENST00000343813.5	2.239	1812	1784	1783	929	928	-2958	28	854	3886
chr1	6284242	ICMT	ENST00000343813.5	2.23103	1781	1753	1752	898	897	-2989	28	854	3886
chr1	6284282	ICMT	ENST00000343813.5	2.22074	1741	1713	1712	858	857	-3029	28	854	3886
chr1	6284496	ICMT	ENST00000343813.5	2.16568	1527	1499	1498	644	643	-3243	28	854	3886
chr1	6284499	ICMT	ENST00000343813.5	2.16491	1524	1496	1495	641	640	-3246	28	854	3886
chr1	6284505	ICMT	ENST00000343813.5	2.16337	1518	1490	1489	635	634	-3252	28	854	3886
chr1	6284542	ICMT	ENST00000343813.5	2.15385	1481	1453	1452	598	597	-3289	28	854	3886
chr1	6284611	ICMT	ENST00000343813.5	2.13609	1412	1384	1383	529	528	-3358	28	854	3886
chr1	6284636	ICMT	ENST00000343813.5	2.12966	1387	1359	1358	504	503	-3383	28	854	3886
chr1	6284669	ICMT	ENST00000343813.5	2.12117	1354	1326	1325	471	470	-3416	28	854	3886
chr1	6284678	ICMT	ENST00000343813.5	2.11886	1345	1317	1316	462	461	-3425	28	854	3886
chr1	6284692	ICMT	ENST00000343813.5	2.11526	1331	1303	1302	448	447	-3439	28	854	3886
chr1	6284760	ICMT	ENST00000343813.5	2.09776	1263	1235	1234	380	379	-3507	28	854	3886
chr1	6284767	ICMT	ENST00000343813.5	2.09596	1256	1228	1227	373	372	-3514	28	854	3886
chr1	6285025	ICMT	ENST00000343813.5	2.02959	998	970	969	115	114	-3772	28	854	3886
chr1	6285050	ICMT	ENST00000343813.5	2.02315	973	945	944	90	89	-3797	28	854	3886
chr1	6285139	ICMT	ENST00000343813.5	2.00026	884	856	855	1	0	-3886	28	854	3886
chr1	6307735	GPR153	ENST00000377893.2	2.83484	3752	3493	3492	1663	1662	-329	259	1829	1991
chr1	6324356	ACOT7	ENST00000361521.4	2.92901	2405	1414	1413	301	300	-23	991	1112	323
chr1	6324447	ACOT7	ENST00000361521.4	2.64815	2314	1323	1322	210	209	-114	991	1112	323
chr1	6651019	KLHL21	ENST00000377658.4	2.91102	4251	4200	4199	2406	2405	-235	51	1793	2640
chr1	6651058	KLHL21	ENST00000377658.4	2.89625	4212	4161	4160	2367	2366	-274	51	1793	2640
chr1	6651537	KLHL21	ENST00000377658.4	2.71488	3733	3682	3681	1888	1887	-753	51	1793	2640
chr1	6652263	KLHL21	ENST00000377658.4	2.43998	3007	2956	2955	1162	1161	-1479	51	1793	2640
chr1	6652269	KLHL21	ENST00000377658.4	2.43771	3001	2950	2949	1156	1155	-1485	51	1793	2640
chr1	6681881	PHF13	ENST00000377648.4	2.07679	1468	1087	1086	184	183	-2212	381	902	2395
chr1	6683297	PHF13	ENST00000377648.4	2.66778	2884	2503	2502	1600	1599	-796	381	902	2395
chr1	6693347	THAP3	ENST00000054650.4	2.43033	1087	930	929	210	209	-278	157	719	487
chr1	6693362	THAP3	ENST00000054650.4	2.46107	1102	945	944	225	224	-263	157	719	487
chr1	6693571	THAP3	ENST00000054650.4	2.88934	1311	1154	1153	434	433	-54	157	719	487
chr1	6694486	DNAJC11	ENST00000349363.6	2.27933	1098	1057	1056	100	99	-258	41	956	357
chr1	6694494	DNAJC11	ENST00000349363.6	2.25698	1090	1049	1048	92	91	-266	41	956	357
chr1	7839770	VAMP3	ENST00000054666.6	2.03637	482	368	367	65	64	-1722	114	302	1786
chr1	7839788	VAMP3	ENST00000054666.6	2.04645	500	386	385	83	82	-1704	114	302	1786
chr1	7839896	VAMP3	ENST00000054666.6	2.10688	608	494	493	191	190	-1596	114	302	1786
chr1	7839987	VAMP3	ENST00000054666.6	2.15781	699	585	584	282	281	-1505	114	302	1786
chr1	7840072	VAMP3	ENST00000054666.6	2.20537	784	670	669	367	366	-1420	114	302	1786
chr1	7840490	VAMP3	ENST00000054666.6	2.43928	1202	1088	1087	785	784	-1002	114	302	1786
chr1	7840745	VAMP3	ENST00000054666.6	2.58198	1457	1343	1342	1040	1039	-747	114	302	1786
chr1	7841004	VAMP3	ENST00000054666.6	2.72692	1716	1602	1601	1299	1298	-488	114	302	1786
chr1	7841032	VAMP3	ENST00000054666.6	2.74259	1744	1630	1629	1327	1326	-460	114	302	1786
chr1	7841076	VAMP3	ENST00000054666.6	2.76721	1788	1674	1673	1371	1370	-416	114	302	1786
chr1	7841132	VAMP3	ENST00000054666.6	2.79855	1844	1730	1729	1427	1426	-360	114	302	1786
chr1	7841346	VAMP3	ENST00000054666.6	2.9183	2058	1944	1943	1641	1640	-146	114	302	1786
chr1	7841409	VAMP3	ENST00000054666.6	2.95355	2121	2007	2006	1704	1703	-83	114	302	1786
chr1	7841438	VAMP3	ENST00000054666.6	2.96978	2150	2036	2035	1733	1732	-54	114	302	1786
chr1	7841450	VAMP3	ENST00000054666.6	2.9765	2162	2048	2047	1745	1744	-42	114	302	1786
chr1	8045130	PARK7	ENST00000338639.5	2.07111	739	586	585	16	15	-209	153	569	224
chr1	8045136	PARK7	ENST00000338639.5	2.09778	745	592	591	22	21	-203	153	569	224
chr1	8045186	PARK7	ENST00000338639.5	2.32	795	642	641	72	71	-153	153	569	224
chr1	8071982	ERRFI1	ENST00000377482.5	2.86385	2900	2677	2676	1288	1287	-203	223	1388	1490
chr1	8072002	ERRFI1	ENST00000377482.5	2.85044	2880	2657	2656	1268	1267	-223	223	1388	1490
chr1	8072044	ERRFI1	ENST00000377482.5	2.82227	2838	2615	2614	1226	1225	-265	223	1388	1490
chr1	8072122	ERRFI1	ENST00000377482.5	2.76995	2760	2537	2536	1148	1147	-343	223	1388	1490
chr1	8072318	ERRFI1	ENST00000377482.5	2.6385	2564	2341	2340	952	951	-539	223	1388	1490
chr1	8072575	ERRFI1	ENST00000377482.5	2.46613	2307	2084	2083	695	694	-796	223	1388	1490
chr1	8072607	ERRFI1	ENST00000377482.5	2.44467	2275	2052	2051	663	662	-828	223	1388	1490
chr1	8073240	ERRFI1	ENST00000377482.5	2.02012	1642	1419	1418	30	29	-1461	223	1388	1490
chr1	9427838	SPSB1	ENST00000328089.6	2.10424	1366	1026	1025	204	203	-1753	340	821	1956
chr1	9664318	TMEM201	ENST00000340305.5	2.73939	3156	3148	3147	1969	1968	-694	8	1178	2662
chr1	9789337	CLSTN1	ENST00000361311.4	2.83041	4395	4145	4144	1229	1228	-251	250	2915	1479
chr1	9789667	CLSTN1	ENST00000361311.4	2.60743	4065	3815	3814	899	898	-581	250	2915	1479
chr1	9790190	CLSTN1	ENST00000361311.4	2.25405	3542	3292	3291	376	375	-1104	250	2915	1479
chr1	9790212	CLSTN1	ENST00000361311.4	2.23919	3520	3270	3269	354	353	-1126	250	2915	1479
chr1	9790483	CLSTN1	ENST00000361311.4	2.05608	3249	2999	2998	83	82	-1397	250	2915	1479
chr1	9910487	CTNNBIP1	ENST00000377263.1	2.11835	846	535	534	289	288	-2153	311	245	2441
chr1	9990329	LZIC	ENST00000377213.1	2.87671	926	701	700	128	127	-18	225	572	145
chr1	10042765	NMNAT1	ENST00000377205.1	2.00215	989	846	845	6	5	-2791	143	839	2796
chr1	10044453	NMNAT1	ENST00000377205.1	2.60565	2677	2534	2533	1694	1693	-1103	143	839	2796
chr1	10479836	PGD	ENST00000270776.8	2.07595	1519	1482	1481	30	29	-365	37	1451	394
chr1	10479853	PGD	ENST00000270776.8	2.11899	1536	1499	1498	47	46	-348	37	1451	394
chr1	10479863	PGD	ENST00000270776.8	2.1443	1546	1509	1508	57	56	-338	37	1451	394
chr1	10479928	PGD	ENST00000270776.8	2.30886	1611	1574	1573	122	121	-273	37	1451	394
chr1	10480010	PGD	ENST00000270776.8	2.51646	1693	1656	1655	204	203	-191	37	1451	394
chr1	10480134	PGD	ENST00000270776.8	2.83038	1817	1780	1779	328	327	-67	37	1451	394
chr1	10480177	PGD	ENST00000270776.8	2.93924	1860	1823	1822	371	370	-24	37	1451	394
chr1	10502537	APITD1	ENST00000309048.3	2.18564	566	492	491	75	74	-329	74	416	403
chr1	10502690	APITD1	ENST00000309048.3	2.56436	719	645	644	228	227	-176	74	416	403
chr1	10516689	DFFA	ENST00000377038.3	2.97786	5921	5854	5853	4858	4857	-110	67	995	4967
chr1	10516751	DFFA	ENST00000377038.3	2.96538	5859	5792	5791	4796	4795	-172	67	995	4967
chr1	10516755	DFFA	ENST00000377038.3	2.96457	5855	5788	5787	4792	4791	-176	67	995	4967
chr1	10516824	DFFA	ENST00000377038.3	2.95068	5786	5719	5718	4723	4722	-245	67	995	4967
chr1	10516868	DFFA	ENST00000377038.3	2.94183	5742	5675	5674	4679	4678	-289	67	995	4967
chr1	10516877	DFFA	ENST00000377038.3	2.94002	5733	5666	5665	4670	4669	-298	67	995	4967
chr1	10516910	DFFA	ENST00000377038.3	2.93337	5700	5633	5632	4637	4636	-331	67	995	4967
chr1	10517009	DFFA	ENST00000377038.3	2.91345	5601	5534	5533	4538	4537	-430	67	995	4967
chr1	10517028	DFFA	ENST00000377038.3	2.90962	5582	5515	5514	4519	4518	-449	67	995	4967
chr1	10517072	DFFA	ENST00000377038.3	2.90076	5538	5471	5470	4475	4474	-493	67	995	4967
chr1	10517146	DFFA	ENST00000377038.3	2.88587	5464	5397	5396	4401	4400	-567	67	995	4967
chr1	10517203	DFFA	ENST00000377038.3	2.8744	5407	5340	5339	4344	4343	-624	67	995	4967
chr1	10517385	DFFA	ENST00000377038.3	2.83776	5225	5158	5157	4162	4161	-806	67	995	4967
chr1	10517388	DFFA	ENST00000377038.3	2.83716	5222	5155	5154	4159	4158	-809	67	995	4967
chr1	10517671	DFFA	ENST00000377038.3	2.78019	4939	4872	4871	3876	3875	-1092	67	995	4967
chr1	10517686	DFFA	ENST00000377038.3	2.77717	4924	4857	4856	3861	3860	-1107	67	995	4967
chr1	10517745	DFFA	ENST00000377038.3	2.7653	4865	4798	4797	3802	3801	-1166	67	995	4967
chr1	10517829	DFFA	ENST00000377038.3	2.74839	4781	4714	4713	3718	3717	-1250	67	995	4967
chr1	10517900	DFFA	ENST00000377038.3	2.7341	4710	4643	4642	3647	3646	-1321	67	995	4967
chr1	10518259	DFFA	ENST00000377038.3	2.66184	4351	4284	4283	3288	3287	-1680	67	995	4967
chr1	10518327	DFFA	ENST00000377038.3	2.64815	4283	4216	4215	3220	3219	-1748	67	995	4967
chr1	10518365	DFFA	ENST00000377038.3	2.6405	4245	4178	4177	3182	3181	-1786	67	995	4967
chr1	10519259	DFFA	ENST00000377038.3	2.46055	3351	3284	3283	2288	2287	-2680	67	995	4967
chr1	10519338	DFFA	ENST00000377038.3	2.44465	3272	3205	3204	2209	2208	-2759	67	995	4967
chr1	10519340	DFFA	ENST00000377038.3	2.44424	3270	3203	3202	2207	2206	-2761	67	995	4967
chr1	10519500	DFFA	ENST00000377038.3	2.41204	3110	3043	3042	2047	2046	-2921	67	995	4967
chr1	10519541	DFFA	ENST00000377038.3	2.40378	3069	3002	3001	2006	2005	-2962	67	995	4967
chr1	10519955	DFFA	ENST00000377038.3	2.32045	2655	2588	2587	1592	1591	-3376	67	995	4967
chr1	10521002	DFFA	ENST00000377038.3	2.1097	1608	1541	1540	545	544	-4423	67	995	4967
chr1	10521453	DFFA	ENST00000377038.3	2.01892	1157	1090	1089	94	93	-4874	67	995	4967
chr1	11082864	TARDBP	ENST00000240185.3	2.11015	1511	1398	1397	153	152	-1236	113	1244	1388
chr1	11083027	TARDBP	ENST00000240185.3	2.2275	1674	1561	1560	316	315	-1073	113	1244	1388
chr1	11083412	TARDBP	ENST00000240185.3	2.50468	2059	1946	1945	701	700	-688	113	1244	1388
chr1	11083493	TARDBP	ENST00000240185.3	2.56299	2140	2027	2026	782	781	-607	113	1244	1388
chr1	11083629	TARDBP	ENST00000240185.3	2.66091	2276	2163	2162	918	917	-471	113	1244	1388
chr1	11083691	TARDBP	ENST00000240185.3	2.70554	2338	2225	2224	980	979	-409	113	1244	1388
chr1	11083718	TARDBP	ENST00000240185.3	2.72498	2365	2252	2251	1007	1006	-382	113	1244	1388
chr1	11114758	SRM	ENST00000376957.2	2.5942	1153	1073	1072	164	163	-112	80	908	275
chr1	11166793	MTOR	ENST00000361445.4	2.78842	8475	8399	8398	749	748	-201	76	7649	949
chr1	11166842	MTOR	ENST00000361445.4	2.73684	8426	8350	8349	700	699	-250	76	7649	949
chr1	11166948	MTOR	ENST00000361445.4	2.62526	8320	8244	8243	594	593	-356	76	7649	949
chr1	11167088	MTOR	ENST00000361445.4	2.47789	8180	8104	8103	454	453	-496	76	7649	949
chr1	11167090	MTOR	ENST00000361445.4	2.47579	8178	8102	8101	452	451	-498	76	7649	949
chr1	11167105	MTOR	ENST00000361445.4	2.46	8163	8087	8086	437	436	-513	76	7649	949
chr1	11167186	MTOR	ENST00000361445.4	2.37474	8082	8006	8005	356	355	-594	76	7649	949
chr1	11167228	MTOR	ENST00000361445.4	2.33053	8040	7964	7963	314	313	-636	76	7649	949
chr1	11167230	MTOR	ENST00000361445.4	2.32842	8038	7962	7961	312	311	-638	76	7649	949
chr1	11167235	MTOR	ENST00000361445.4	2.32316	8033	7957	7956	307	306	-643	76	7649	949
chr1	11167256	MTOR	ENST00000361445.4	2.30105	8012	7936	7935	286	285	-664	76	7649	949
chr1	11167298	MTOR	ENST00000361445.4	2.25684	7970	7894	7893	244	243	-706	76	7649	949
chr1	11167311	MTOR	ENST00000361445.4	2.24316	7957	7881	7880	231	230	-719	76	7649	949
chr1	11167343	MTOR	ENST00000361445.4	2.20947	7925	7849	7848	199	198	-751	76	7649	949
chr1	11167351	MTOR	ENST00000361445.4	2.20105	7917	7841	7840	191	190	-759	76	7649	949
chr1	11167447	MTOR	ENST00000361445.4	2.1	7821	7745	7744	95	94	-855	76	7649	949
chr1	11167495	MTOR	ENST00000361445.4	2.04947	7773	7697	7696	47	46	-903	76	7649	949
chr1	11734583	MAD2L2	ENST00000235310.3	2.84407	1813	885	884	249	248	-46	928	635	294
chr1	11734824	MAD2L2	ENST00000235310.3	2.02712	1572	644	643	8	7	-287	928	635	294
chr1	11810760	AGTRAP	ENST00000314340.5	2.8918	1044	991	990	511	510	-62	53	479	572
chr1	12034895	PLOD1	ENST00000196061.4	2.04115	2240	2214	2213	30	29	-699	26	2183	728
chr1	12034898	PLOD1	ENST00000196061.4	2.04527	2243	2217	2216	33	32	-696	26	2183	728
chr1	12034907	PLOD1	ENST00000196061.4	2.05761	2252	2226	2225	42	41	-687	26	2183	728
chr1	12034910	PLOD1	ENST00000196061.4	2.06173	2255	2229	2228	45	44	-684	26	2183	728
chr1	12034913	PLOD1	ENST00000196061.4	2.06584	2258	2232	2231	48	47	-681	26	2183	728
chr1	12034965	PLOD1	ENST00000196061.4	2.13717	2310	2284	2283	100	99	-629	26	2183	728
chr1	12034998	PLOD1	ENST00000196061.4	2.18244	2343	2317	2316	133	132	-596	26	2183	728
chr1	12035003	PLOD1	ENST00000196061.4	2.1893	2348	2322	2321	138	137	-591	26	2183	728
chr1	12035013	PLOD1	ENST00000196061.4	2.20302	2358	2332	2331	148	147	-581	26	2183	728
chr1	12035023	PLOD1	ENST00000196061.4	2.21674	2368	2342	2341	158	157	-571	26	2183	728
chr1	12035043	PLOD1	ENST00000196061.4	2.24417	2388	2362	2361	178	177	-551	26	2183	728
chr1	12035045	PLOD1	ENST00000196061.4	2.24691	2390	2364	2363	180	179	-549	26	2183	728
chr1	12035047	PLOD1	ENST00000196061.4	2.24966	2392	2366	2365	182	181	-547	26	2183	728
chr1	12035048	PLOD1	ENST00000196061.4	2.25103	2393	2367	2366	183	182	-546	26	2183	728
chr1	12035064	PLOD1	ENST00000196061.4	2.27298	2409	2383	2382	199	198	-530	26	2183	728
chr1	12035066	PLOD1	ENST00000196061.4	2.27572	2411	2385	2384	201	200	-528	26	2183	728
chr1	12035081	PLOD1	ENST00000196061.4	2.2963	2426	2400	2399	216	215	-513	26	2183	728
chr1	12035096	PLOD1	ENST00000196061.4	2.31687	2441	2415	2414	231	230	-498	26	2183	728
chr1	12035098	PLOD1	ENST00000196061.4	2.31962	2443	2417	2416	233	232	-496	26	2183	728
chr1	12035103	PLOD1	ENST00000196061.4	2.32647	2448	2422	2421	238	237	-491	26	2183	728
chr1	12035105	PLOD1	ENST00000196061.4	2.32922	2450	2424	2423	240	239	-489	26	2183	728
chr1	12035111	PLOD1	ENST00000196061.4	2.33745	2456	2430	2429	246	245	-483	26	2183	728
chr1	12035131	PLOD1	ENST00000196061.4	2.36488	2476	2450	2449	266	265	-463	26	2183	728
chr1	12035133	PLOD1	ENST00000196061.4	2.36763	2478	2452	2451	268	267	-461	26	2183	728
chr1	12035144	PLOD1	ENST00000196061.4	2.38272	2489	2463	2462	279	278	-450	26	2183	728
chr1	12035156	PLOD1	ENST00000196061.4	2.39918	2501	2475	2474	291	290	-438	26	2183	728
chr1	12035181	PLOD1	ENST00000196061.4	2.43347	2526	2500	2499	316	315	-413	26	2183	728
chr1	12035205	PLOD1	ENST00000196061.4	2.46639	2550	2524	2523	340	339	-389	26	2183	728
chr1	12035234	PLOD1	ENST00000196061.4	2.50617	2579	2553	2552	369	368	-360	26	2183	728
chr1	12035293	PLOD1	ENST00000196061.4	2.58711	2638	2612	2611	428	427	-301	26	2183	728
chr1	12035302	PLOD1	ENST00000196061.4	2.59945	2647	2621	2620	437	436	-292	26	2183	728
chr1	12035320	PLOD1	ENST00000196061.4	2.62414	2665	2639	2638	455	454	-274	26	2183	728
chr1	12035333	PLOD1	ENST00000196061.4	2.64198	2678	2652	2651	468	467	-261	26	2183	728
chr1	12035353	PLOD1	ENST00000196061.4	2.66941	2698	2672	2671	488	487	-241	26	2183	728
chr1	12035391	PLOD1	ENST00000196061.4	2.72154	2736	2710	2709	526	525	-203	26	2183	728
chr1	12035408	PLOD1	ENST00000196061.4	2.74486	2753	2727	2726	543	542	-186	26	2183	728
chr1	12035414	PLOD1	ENST00000196061.4	2.75309	2759	2733	2732	549	548	-180	26	2183	728
chr1	12035436	PLOD1	ENST00000196061.4	2.78326	2781	2755	2754	571	570	-158	26	2183	728
chr1	12035455	PLOD1	ENST00000196061.4	2.80933	2800	2774	2773	590	589	-139	26	2183	728
chr1	12035470	PLOD1	ENST00000196061.4	2.8299	2815	2789	2788	605	604	-124	26	2183	728
chr1	12071779	MFN2	ENST00000235329.5	2.0808	2752	2431	2430	157	156	-1786	321	2273	1942
chr1	12071845	MFN2	ENST00000235329.5	2.11477	2818	2497	2496	223	222	-1720	321	2273	1942
chr1	12071871	MFN2	ENST00000235329.5	2.12815	2844	2523	2522	249	248	-1694	321	2273	1942
chr1	12071912	MFN2	ENST00000235329.5	2.14925	2885	2564	2563	290	289	-1653	321	2273	1942
chr1	12071984	MFN2	ENST00000235329.5	2.18631	2957	2636	2635	362	361	-1581	321	2273	1942
chr1	12071986	MFN2	ENST00000235329.5	2.18734	2959	2638	2637	364	363	-1579	321	2273	1942
chr1	12072171	MFN2	ENST00000235329.5	2.28255	3144	2823	2822	549	548	-1394	321	2273	1942
chr1	12072553	MFN2	ENST00000235329.5	2.47916	3526	3205	3204	931	930	-1012	321	2273	1942
chr1	12072703	MFN2	ENST00000235329.5	2.55636	3676	3355	3354	1081	1080	-862	321	2273	1942
chr1	12072771	MFN2	ENST00000235329.5	2.59135	3744	3423	3422	1149	1148	-794	321	2273	1942
chr1	12072775	MFN2	ENST00000235329.5	2.59341	3748	3427	3426	1153	1152	-790	321	2273	1942
chr1	12072823	MFN2	ENST00000235329.5	2.61812	3796	3475	3474	1201	1200	-742	321	2273	1942
chr1	12072938	MFN2	ENST00000235329.5	2.6773	3911	3590	3589	1316	1315	-627	321	2273	1942
chr1	12073043	MFN2	ENST00000235329.5	2.73134	4016	3695	3694	1421	1420	-522	321	2273	1942
chr1	12073045	MFN2	ENST00000235329.5	2.73237	4018	3697	3696	1423	1422	-520	321	2273	1942
chr1	12073061	MFN2	ENST00000235329.5	2.74061	4034	3713	3712	1439	1438	-504	321	2273	1942
chr1	12073063	MFN2	ENST00000235329.5	2.74164	4036	3715	3714	1441	1440	-502	321	2273	1942
chr1	12073245	MFN2	ENST00000235329.5	2.83531	4218	3897	3896	1623	1622	-320	321	2273	1942
chr1	12073277	MFN2	ENST00000235329.5	2.85178	4250	3929	3928	1655	1654	-288	321	2273	1942
chr1	12073326	MFN2	ENST00000235329.5	2.87699	4299	3978	3977	1704	1703	-239	321	2273	1942
chr1	12073329	MFN2	ENST00000235329.5	2.87854	4302	3981	3980	1707	1706	-236	321	2273	1942
chr1	12073337	MFN2	ENST00000235329.5	2.88266	4310	3989	3988	1715	1714	-228	321	2273	1942
chr1	12073358	MFN2	ENST00000235329.5	2.89346	4331	4010	4009	1736	1735	-207	321	2273	1942
chr1	12073415	MFN2	ENST00000235329.5	2.9228	4388	4067	4066	1793	1792	-150	321	2273	1942
chr1	12073460	MFN2	ENST00000235329.5	2.94596	4433	4112	4111	1838	1837	-105	321	2273	1942
chr1	12628082	DHRS3	ENST00000376223.2	2.66744	1579	1196	1195	287	286	-143	383	908	429
chr1	12628124	DHRS3	ENST00000376223.2	2.56977	1537	1154	1153	245	244	-185	383	908	429
chr1	12628137	DHRS3	ENST00000376223.2	2.53953	1524	1141	1140	232	231	-198	383	908	429
chr1	12628180	DHRS3	ENST00000376223.2	2.43953	1481	1098	1097	189	188	-241	383	908	429
chr1	12628184	DHRS3	ENST00000376223.2	2.43023	1477	1094	1093	185	184	-245	383	908	429
chr1	13942452	PDPN	ENST00000294489.6	2.02248	1103	763	762	46	45	-2000	340	716	2045
chr1	13942580	PDPN	ENST00000294489.6	2.08504	1231	891	890	174	173	-1872	340	716	2045
chr1	13942595	PDPN	ENST00000294489.6	2.09238	1246	906	905	189	188	-1857	340	716	2045
chr1	13942692	PDPN	ENST00000294489.6	2.13978	1343	1003	1002	286	285	-1760	340	716	2045
chr1	13942707	PDPN	ENST00000294489.6	2.14712	1358	1018	1017	301	300	-1745	340	716	2045
chr1	13942714	PDPN	ENST00000294489.6	2.15054	1365	1025	1024	308	307	-1738	340	716	2045
chr1	13942833	PDPN	ENST00000294489.6	2.2087	1484	1144	1143	427	426	-1619	340	716	2045
chr1	13942885	PDPN	ENST00000294489.6	2.23412	1536	1196	1195	479	478	-1567	340	716	2045
chr1	13942937	PDPN	ENST00000294489.6	2.25953	1588	1248	1247	531	530	-1515	340	716	2045
chr1	13943007	PDPN	ENST00000294489.6	2.29374	1658	1318	1317	601	600	-1445	340	716	2045
chr1	13943029	PDPN	ENST00000294489.6	2.3045	1680	1340	1339	623	622	-1423	340	716	2045
chr1	13943041	PDPN	ENST00000294489.6	2.31036	1692	1352	1351	635	634	-1411	340	716	2045
chr1	13943058	PDPN	ENST00000294489.6	2.31867	1709	1369	1368	652	651	-1394	340	716	2045
chr1	13943092	PDPN	ENST00000294489.6	2.33529	1743	1403	1402	686	685	-1360	340	716	2045
chr1	13943137	PDPN	ENST00000294489.6	2.35728	1788	1448	1447	731	730	-1315	340	716	2045
chr1	13943154	PDPN	ENST00000294489.6	2.36559	1805	1465	1464	748	747	-1298	340	716	2045
chr1	13943212	PDPN	ENST00000294489.6	2.39394	1863	1523	1522	806	805	-1240	340	716	2045
chr1	13943229	PDPN	ENST00000294489.6	2.40225	1880	1540	1539	823	822	-1223	340	716	2045
chr1	13943445	PDPN	ENST00000294489.6	2.50782	2096	1756	1755	1039	1038	-1007	340	716	2045
chr1	13943468	PDPN	ENST00000294489.6	2.51906	2119	1779	1778	1062	1061	-984	340	716	2045
chr1	13943543	PDPN	ENST00000294489.6	2.55572	2194	1854	1853	1137	1136	-909	340	716	2045
chr1	13943576	PDPN	ENST00000294489.6	2.57185	2227	1887	1886	1170	1169	-876	340	716	2045
chr1	13943686	PDPN	ENST00000294489.6	2.62561	2337	1997	1996	1280	1279	-766	340	716	2045
chr1	13943753	PDPN	ENST00000294489.6	2.65836	2404	2064	2063	1347	1346	-699	340	716	2045
chr1	13943774	PDPN	ENST00000294489.6	2.66862	2425	2085	2084	1368	1367	-678	340	716	2045
chr1	13943839	PDPN	ENST00000294489.6	2.70039	2490	2150	2149	1433	1432	-613	340	716	2045
chr1	13944257	PDPN	ENST00000294489.6	2.90469	2908	2568	2567	1851	1850	-195	340	716	2045
chr1	14113078	PRDM2	ENST00000311066.5	2.03655	5960	5105	5104	56	55	-1476	855	5048	1531
chr1	14113094	PRDM2	ENST00000311066.5	2.047	5976	5121	5120	72	71	-1460	855	5048	1531
chr1	14113106	PRDM2	ENST00000311066.5	2.05483	5988	5133	5132	84	83	-1448	855	5048	1531
chr1	14113443	PRDM2	ENST00000311066.5	2.2748	6325	5470	5469	421	420	-1111	855	5048	1531
chr1	14113563	PRDM2	ENST00000311066.5	2.35313	6445	5590	5589	541	540	-991	855	5048	1531
chr1	14113834	PRDM2	ENST00000311066.5	2.53003	6716	5861	5860	812	811	-720	855	5048	1531
chr1	14113854	PRDM2	ENST00000311066.5	2.54308	6736	5881	5880	832	831	-700	855	5048	1531
chr1	14113925	PRDM2	ENST00000311066.5	2.58943	6807	5952	5951	903	902	-629	855	5048	1531
chr1	14113960	PRDM2	ENST00000311066.5	2.61227	6842	5987	5986	938	937	-594	855	5048	1531
chr1	15546277	TMEM51	ENST00000376008.2	2.05156	1231	800	799	38	37	-699	431	761	736
chr1	15546301	TMEM51	ENST00000376008.2	2.08412	1255	824	823	62	61	-675	431	761	736
chr1	15546309	TMEM51	ENST00000376008.2	2.09498	1263	832	831	70	69	-667	431	761	736
chr1	15546537	TMEM51	ENST00000376008.2	2.40434	1491	1060	1059	298	297	-439	431	761	736
chr1	15755314	EFHD2	ENST00000375980.4	2.05806	893	817	816	94	93	-1525	76	722	1618
chr1	15755343	EFHD2	ENST00000375980.4	2.07597	922	846	845	123	122	-1496	76	722	1618
chr1	15755413	EFHD2	ENST00000375980.4	2.11921	992	916	915	193	192	-1426	76	722	1618
chr1	15755491	EFHD2	ENST00000375980.4	2.16739	1070	994	993	271	270	-1348	76	722	1618
chr1	15755675	EFHD2	ENST00000375980.4	2.28104	1254	1178	1177	455	454	-1164	76	722	1618
chr1	15756519	EFHD2	ENST00000375980.4	2.80235	2098	2022	2021	1299	1298	-320	76	722	1618
chr1	15819150	CASP9	ENST00000333868.5	2.42793	1633	1539	1538	288	287	-385	94	1250	672
chr1	15819266	CASP9	ENST00000333868.5	2.25557	1517	1423	1422	172	171	-501	94	1250	672
chr1	15819269	CASP9	ENST00000333868.5	2.25111	1514	1420	1419	169	168	-504	94	1250	672
chr1	15819278	CASP9	ENST00000333868.5	2.23774	1505	1411	1410	160	159	-513	94	1250	672
chr1	15819311	CASP9	ENST00000333868.5	2.18871	1472	1378	1377	127	126	-546	94	1250	672
chr1	15819340	CASP9	ENST00000333868.5	2.14562	1443	1349	1348	98	97	-575	94	1250	672
chr1	15819348	CASP9	ENST00000333868.5	2.13373	1435	1341	1340	90	89	-583	94	1250	672
chr1	15986502	DDI2	ENST00000480945.1	2.02345	1587	1417	1416	217	216	-9037	170	1199	9253
chr1	15986558	DDI2	ENST00000480945.1	2.0295	1643	1473	1472	273	272	-8981	170	1199	9253
chr1	15987147	DDI2	ENST00000480945.1	2.09315	2232	2062	2061	862	861	-8392	170	1199	9253
chr1	15994656	DDI2	ENST00000480945.1	2.90458	9741	9571	9570	8371	8370	-883	170	1199	9253
chr1	15995035	DDI2	ENST00000480945.1	2.94554	10120	9950	9949	8750	8749	-504	170	1199	9253
chr1	16266119	SPEN	ENST00000375759.3	2.19071	11395	11192	11191	197	196	-836	203	10994	1032
chr1	16266163	SPEN	ENST00000375759.3	2.2333	11439	11236	11235	241	240	-792	203	10994	1032
chr1	16266210	SPEN	ENST00000375759.3	2.2788	11486	11283	11282	288	287	-745	203	10994	1032
chr1	16266279	SPEN	ENST00000375759.3	2.3456	11555	11352	11351	357	356	-676	203	10994	1032
chr1	16266291	SPEN	ENST00000375759.3	2.35721	11567	11364	11363	369	368	-664	203	10994	1032
chr1	16266448	SPEN	ENST00000375759.3	2.5092	11724	11521	11520	526	525	-507	203	10994	1032
chr1	16266790	SPEN	ENST00000375759.3	2.84027	12066	11863	11862	868	867	-165	203	10994	1032
chr1	16266803	SPEN	ENST00000375759.3	2.85286	12079	11876	11875	881	880	-152	203	10994	1032
chr1	16266811	SPEN	ENST00000375759.3	2.8606	12087	11884	11883	889	888	-144	203	10994	1032
chr1	16266834	SPEN	ENST00000375759.3	2.88287	12110	11907	11906	912	911	-121	203	10994	1032
chr1	16451272	EPHA2	ENST00000358432.5	2.49886	3523	3369	3368	438	437	-440	154	2930	877
chr1	16451277	EPHA2	ENST00000358432.5	2.49317	3518	3364	3363	433	432	-445	154	2930	877
chr1	16451586	EPHA2	ENST00000358432.5	2.14123	3209	3055	3054	124	123	-754	154	2930	877
chr1	16451603	EPHA2	ENST00000358432.5	2.12187	3192	3038	3037	107	106	-771	154	2930	877
chr1	16721795	SZRD1	ENST00000375590.3	2.03791	530	509	508	32	31	-812	21	476	843
chr1	16721804	SZRD1	ENST00000375590.3	2.04858	539	518	517	41	40	-803	21	476	843
chr1	16721946	SZRD1	ENST00000375590.3	2.21682	681	660	659	183	182	-661	21	476	843
chr1	16722066	SZRD1	ENST00000375590.3	2.359	801	780	779	303	302	-541	21	476	843
chr1	16722111	SZRD1	ENST00000375590.3	2.41232	846	825	824	348	347	-496	21	476	843
chr1	16722492	SZRD1	ENST00000375590.3	2.86374	1227	1206	1205	729	728	-115	21	476	843
chr1	16722544	SZRD1	ENST00000375590.3	2.92536	1279	1258	1257	781	780	-63	21	476	843
chr1	16785496	NECAP2	ENST00000337132.5	2.09343	992	903	902	111	110	-1077	89	791	1187
chr1	16785525	NECAP2	ENST00000337132.5	2.11785	1021	932	931	140	139	-1048	89	791	1187
chr1	16785562	NECAP2	ENST00000337132.5	2.14899	1058	969	968	177	176	-1011	89	791	1187
chr1	16785566	NECAP2	ENST00000337132.5	2.15236	1062	973	972	181	180	-1007	89	791	1187
chr1	16785639	NECAP2	ENST00000337132.5	2.2138	1135	1046	1045	254	253	-934	89	791	1187
chr1	16785669	NECAP2	ENST00000337132.5	2.23906	1165	1076	1075	284	283	-904	89	791	1187
chr1	16785672	NECAP2	ENST00000337132.5	2.24158	1168	1079	1078	287	286	-901	89	791	1187
chr1	16785684	NECAP2	ENST00000337132.5	2.25168	1180	1091	1090	299	298	-889	89	791	1187
chr1	16785697	NECAP2	ENST00000337132.5	2.26263	1193	1104	1103	312	311	-876	89	791	1187
chr1	16785775	NECAP2	ENST00000337132.5	2.32828	1271	1182	1181	390	389	-798	89	791	1187
chr1	16785783	NECAP2	ENST00000337132.5	2.33502	1279	1190	1189	398	397	-790	89	791	1187
chr1	16785811	NECAP2	ENST00000337132.5	2.35859	1307	1218	1217	426	425	-762	89	791	1187
chr1	16785813	NECAP2	ENST00000337132.5	2.36027	1309	1220	1219	428	427	-760	89	791	1187
chr1	16785826	NECAP2	ENST00000337132.5	2.37121	1322	1233	1232	441	440	-747	89	791	1187
chr1	16785901	NECAP2	ENST00000337132.5	2.43434	1397	1308	1307	516	515	-672	89	791	1187
chr1	16785980	NECAP2	ENST00000337132.5	2.50084	1476	1387	1386	595	594	-593	89	791	1187
chr1	16785984	NECAP2	ENST00000337132.5	2.50421	1480	1391	1390	599	598	-589	89	791	1187
chr1	16786003	NECAP2	ENST00000337132.5	2.5202	1499	1410	1409	618	617	-570	89	791	1187
chr1	16786137	NECAP2	ENST00000337132.5	2.633	1633	1544	1543	752	751	-436	89	791	1187
chr1	16786233	NECAP2	ENST00000337132.5	2.7138	1729	1640	1639	848	847	-340	89	791	1187
chr1	16786256	NECAP2	ENST00000337132.5	2.73316	1752	1663	1662	871	870	-317	89	791	1187
chr1	16786264	NECAP2	ENST00000337132.5	2.7399	1760	1671	1670	879	878	-309	89	791	1187
chr1	16786283	NECAP2	ENST00000337132.5	2.75589	1779	1690	1689	898	897	-290	89	791	1187
chr1	16786293	NECAP2	ENST00000337132.5	2.76431	1789	1700	1699	908	907	-280	89	791	1187
chr1	16786295	NECAP2	ENST00000337132.5	2.76599	1791	1702	1701	910	909	-278	89	791	1187
chr1	16786307	NECAP2	ENST00000337132.5	2.77609	1803	1714	1713	922	921	-266	89	791	1187
chr1	16786324	NECAP2	ENST00000337132.5	2.7904	1820	1731	1730	939	938	-249	89	791	1187
chr1	16786331	NECAP2	ENST00000337132.5	2.7963	1827	1738	1737	946	945	-242	89	791	1187
chr1	16786383	NECAP2	ENST00000337132.5	2.84007	1879	1790	1789	998	997	-190	89	791	1187
chr1	16786409	NECAP2	ENST00000337132.5	2.86195	1905	1816	1815	1024	1023	-164	89	791	1187
chr1	16786434	NECAP2	ENST00000337132.5	2.883	1930	1841	1840	1049	1048	-139	89	791	1187
chr1	16890421	NBPF1	ENST00000430580.2	2.01047	4324	3437	3436	17	16	-1607	887	3419	1623
chr1	17393539	PADI2	ENST00000375486.4	2.87604	4061	3998	3997	2000	1999	-283	63	1997	2282
chr1	17393574	PADI2	ENST00000375486.4	2.86071	4026	3963	3962	1965	1964	-318	63	1997	2282
chr1	17393576	PADI2	ENST00000375486.4	2.85983	4024	3961	3960	1963	1962	-320	63	1997	2282
chr1	17393580	PADI2	ENST00000375486.4	2.85808	4020	3957	3956	1959	1958	-324	63	1997	2282
chr1	17393635	PADI2	ENST00000375486.4	2.83399	3965	3902	3901	1904	1903	-379	63	1997	2282
chr1	17733501	RCC2	ENST00000375436.4	2.89485	3841	3654	3653	2085	2084	-245	187	1568	2329
chr1	17733744	RCC2	ENST00000375436.4	2.79056	3598	3411	3410	1842	1841	-488	187	1568	2329
chr1	17733851	RCC2	ENST00000375436.4	2.74464	3491	3304	3303	1735	1734	-595	187	1568	2329
chr1	17733906	RCC2	ENST00000375436.4	2.72103	3436	3249	3248	1680	1679	-650	187	1568	2329
chr1	17733926	RCC2	ENST00000375436.4	2.71245	3416	3229	3228	1660	1659	-670	187	1568	2329
chr1	17734003	RCC2	ENST00000375436.4	2.6794	3339	3152	3151	1583	1582	-747	187	1568	2329
chr1	17734226	RCC2	ENST00000375436.4	2.58369	3116	2929	2928	1360	1359	-970	187	1568	2329
chr1	17734487	RCC2	ENST00000375436.4	2.47167	2855	2668	2667	1099	1098	-1231	187	1568	2329
chr1	17734935	RCC2	ENST00000375436.4	2.2794	2407	2220	2219	651	650	-1679	187	1568	2329
chr1	17735438	RCC2	ENST00000375436.4	2.06352	1904	1717	1716	148	147	-2182	187	1568	2329
chr1	17735573	RCC2	ENST00000375436.4	2.00558	1769	1582	1581	13	12	-2317	187	1568	2329
chr1	19585369	MRTO4	ENST00000330263.4	2.03467	1061	765	764	45	44	-1253	296	719	1297
chr1	19585378	MRTO4	ENST00000330263.4	2.0416	1070	774	773	54	53	-1244	296	719	1297
chr1	19585383	MRTO4	ENST00000330263.4	2.04545	1075	779	778	59	58	-1239	296	719	1297
chr1	19585422	MRTO4	ENST00000330263.4	2.0755	1114	818	817	98	97	-1200	296	719	1297
chr1	19585429	MRTO4	ENST00000330263.4	2.08089	1121	825	824	105	104	-1193	296	719	1297
chr1	19585436	MRTO4	ENST00000330263.4	2.08629	1128	832	831	112	111	-1186	296	719	1297
chr1	19585447	MRTO4	ENST00000330263.4	2.09476	1139	843	842	123	122	-1175	296	719	1297
chr1	19585451	MRTO4	ENST00000330263.4	2.09784	1143	847	846	127	126	-1171	296	719	1297
chr1	19585511	MRTO4	ENST00000330263.4	2.14407	1203	907	906	187	186	-1111	296	719	1297
chr1	19585591	MRTO4	ENST00000330263.4	2.2057	1283	987	986	267	266	-1031	296	719	1297
chr1	19585610	MRTO4	ENST00000330263.4	2.22034	1302	1006	1005	286	285	-1012	296	719	1297
chr1	19585651	MRTO4	ENST00000330263.4	2.25193	1343	1047	1046	327	326	-971	296	719	1297
chr1	19630559	AKR7A2	ENST00000235835.3	2.61538	1261	1240	1239	160	159	-100	21	1079	259
chr1	19655381	PQLC2	ENST00000375153.3	2.38305	1759	1120	1119	244	243	-393	639	875	636
chr1	19655388	PQLC2	ENST00000375153.3	2.39403	1766	1127	1126	251	250	-386	639	875	636
chr1	19655448	PQLC2	ENST00000375153.3	2.48823	1826	1187	1186	311	310	-326	639	875	636
chr1	19655455	PQLC2	ENST00000375153.3	2.49922	1833	1194	1193	318	317	-319	639	875	636
chr1	19655458	PQLC2	ENST00000375153.3	2.50392	1836	1197	1196	321	320	-316	639	875	636
chr1	19655467	PQLC2	ENST00000375153.3	2.51805	1845	1206	1205	330	329	-307	639	875	636
chr1	19655532	PQLC2	ENST00000375153.3	2.62009	1910	1271	1270	395	394	-242	639	875	636
chr1	19655537	PQLC2	ENST00000375153.3	2.62794	1915	1276	1275	400	399	-237	639	875	636
chr1	19655548	PQLC2	ENST00000375153.3	2.64521	1926	1287	1286	411	410	-226	639	875	636
chr1	19655566	PQLC2	ENST00000375153.3	2.67347	1944	1305	1304	429	428	-208	639	875	636
chr1	19655584	PQLC2	ENST00000375153.3	2.70173	1962	1323	1322	447	446	-190	639	875	636
chr1	19655596	PQLC2	ENST00000375153.3	2.72057	1974	1335	1334	459	458	-178	639	875	636
chr1	19665544	CAPZB	ENST00000264203.3	2.6536	1793	1300	1299	517	516	-274	493	782	790
chr1	19665636	CAPZB	ENST00000264203.3	2.53729	1701	1208	1207	425	424	-366	493	782	790
chr1	19665717	CAPZB	ENST00000264203.3	2.43489	1620	1127	1126	344	343	-447	493	782	790
chr1	19665808	CAPZB	ENST00000264203.3	2.31985	1529	1036	1035	253	252	-538	493	782	790
chr1	19953071	MINOS1	ENST00000322753.6	2.05148	468	413	412	176	175	-3243	55	236	3418
chr1	19983747	NBL1	ENST00000375136.3	2.09448	973	671	670	125	124	-1198	302	545	1322
chr1	19983747	MINOS1-NBL1	ENST00000602662.1	2.13484	820	671	670	125	124	-802	149	545	926
chr1	19984645	NBL1	ENST00000375136.3	2.77324	1871	1569	1568	1023	1022	-300	302	545	1322
chr1	20009532	TMCO4	ENST00000294543.6	2.00121	2147	1906	1905	1	0	-826	241	1904	826
chr1	20238204	OTUD3	ENST00000375120.3	2.76265	5162	5162	5161	3965	3964	-1234	0	1196	5198
chr1	20238239	OTUD3	ENST00000375120.3	2.76938	5197	5197	5196	4000	3999	-1199	0	1196	5198
chr1	20238588	OTUD3	ENST00000375120.3	2.83651	5546	5546	5545	4349	4348	-850	0	1196	5198
chr1	20238591	OTUD3	ENST00000375120.3	2.83708	5549	5549	5548	4352	4351	-847	0	1196	5198
chr1	20238601	OTUD3	ENST00000375120.3	2.83901	5559	5559	5558	4362	4361	-837	0	1196	5198
chr1	20238967	OTUD3	ENST00000375120.3	2.90941	5925	5925	5924	4728	4727	-471	0	1196	5198
chr1	20239080	OTUD3	ENST00000375120.3	2.93114	6038	6038	6037	4841	4840	-358	0	1196	5198
chr1	20239285	OTUD3	ENST00000375120.3	2.97057	6243	6243	6242	5046	5045	-153	0	1196	5198
chr1	20239311	OTUD3	ENST00000375120.3	2.97557	6269	6269	6268	5072	5071	-127	0	1196	5198
chr1	20809152	CAMK2N1	ENST00000375078.3	2.78696	2067	1227	1226	990	989	-268	840	236	1257
chr1	20809271	CAMK2N1	ENST00000375078.3	2.69237	1948	1108	1107	871	870	-387	840	236	1257
chr1	20809667	CAMK2N1	ENST00000375078.3	2.37758	1552	712	711	475	474	-783	840	236	1257
chr1	20809817	CAMK2N1	ENST00000375078.3	2.25835	1402	562	561	325	324	-933	840	236	1257
chr1	20809823	CAMK2N1	ENST00000375078.3	2.25358	1396	556	555	319	318	-939	840	236	1257
chr1	20826090	MUL1	ENST00000264198.3	2.88145	2288	2152	2151	1093	1092	-147	136	1058	1239
chr1	20826219	MUL1	ENST00000264198.3	2.77742	2159	2023	2022	964	963	-276	136	1058	1239
chr1	20826221	MUL1	ENST00000264198.3	2.77581	2157	2021	2020	962	961	-278	136	1058	1239
chr1	20826286	MUL1	ENST00000264198.3	2.72339	2092	1956	1955	897	896	-343	136	1058	1239
chr1	20826443	MUL1	ENST00000264198.3	2.59677	1935	1799	1798	740	739	-500	136	1058	1239
chr1	20826600	MUL1	ENST00000264198.3	2.47016	1778	1642	1641	583	582	-657	136	1058	1239
chr1	20826645	MUL1	ENST00000264198.3	2.43387	1733	1597	1596	538	537	-702	136	1058	1239
chr1	20826754	MUL1	ENST00000264198.3	2.34597	1624	1488	1487	429	428	-811	136	1058	1239
chr1	20826757	MUL1	ENST00000264198.3	2.34355	1621	1485	1484	426	425	-814	136	1058	1239
chr1	20826808	MUL1	ENST00000264198.3	2.30242	1570	1434	1433	375	374	-865	136	1058	1239
chr1	20826817	MUL1	ENST00000264198.3	2.29516	1561	1425	1424	366	365	-874	136	1058	1239
chr1	20826826	MUL1	ENST00000264198.3	2.2879	1552	1416	1415	357	356	-883	136	1058	1239
chr1	20826884	MUL1	ENST00000264198.3	2.24113	1494	1358	1357	299	298	-941	136	1058	1239
chr1	20827040	MUL1	ENST00000264198.3	2.11532	1338	1202	1201	143	142	-1097	136	1058	1239
chr1	20827044	MUL1	ENST00000264198.3	2.1121	1334	1198	1197	139	138	-1101	136	1058	1239
chr1	20827080	MUL1	ENST00000264198.3	2.08306	1298	1162	1161	103	102	-1137	136	1058	1239
chr1	20827082	MUL1	ENST00000264198.3	2.08145	1296	1160	1159	101	100	-1139	136	1058	1239
chr1	20827120	MUL1	ENST00000264198.3	2.05081	1258	1122	1121	63	62	-1177	136	1058	1239
chr1	20827166	MUL1	ENST00000264198.3	2.01371	1212	1076	1075	17	16	-1223	136	1058	1239
chr1	20977231	PINK1	ENST00000321556.4	2.05732	1886	1793	1792	47	46	-773	93	1745	819
chr1	20977376	PINK1	ENST00000321556.4	2.23415	2031	1938	1937	192	191	-628	93	1745	819
chr1	20977379	PINK1	ENST00000321556.4	2.2378	2034	1941	1940	195	194	-625	93	1745	819
chr1	20977447	PINK1	ENST00000321556.4	2.32073	2102	2009	2008	263	262	-557	93	1745	819
chr1	20977577	PINK1	ENST00000321556.4	2.47927	2232	2139	2138	393	392	-427	93	1745	819
chr1	20977580	PINK1	ENST00000321556.4	2.48293	2235	2142	2141	396	395	-424	93	1745	819
chr1	20977583	PINK1	ENST00000321556.4	2.48659	2238	2145	2144	399	398	-421	93	1745	819
chr1	20977605	PINK1	ENST00000321556.4	2.51341	2260	2167	2166	421	420	-399	93	1745	819
chr1	20977688	PINK1	ENST00000321556.4	2.61463	2343	2250	2249	504	503	-316	93	1745	819
chr1	20978492	DDOST	ENST00000375048.3	2.63123	1856	1751	1750	380	379	-222	105	1370	601
chr1	20978501	DDOST	ENST00000375048.3	2.61628	1847	1742	1741	371	370	-231	105	1370	601
chr1	20978520	DDOST	ENST00000375048.3	2.58472	1828	1723	1722	352	351	-250	105	1370	601
chr1	20978637	DDOST	ENST00000375048.3	2.39037	1711	1606	1605	235	234	-367	105	1370	601
chr1	20978644	DDOST	ENST00000375048.3	2.37874	1704	1599	1598	228	227	-374	105	1370	601
chr1	20978839	DDOST	ENST00000375048.3	2.05482	1509	1404	1403	33	32	-569	105	1370	601
chr1	21069398	HP1BP3	ENST00000312239.5	2.88577	3693	3554	3553	1892	1891	-244	139	1661	2135
chr1	21069711	HP1BP3	ENST00000312239.5	2.73923	3380	3241	3240	1579	1578	-557	139	1661	2135
chr1	21069866	HP1BP3	ENST00000312239.5	2.66667	3225	3086	3085	1424	1423	-712	139	1661	2135
chr1	21069886	HP1BP3	ENST00000312239.5	2.6573	3205	3066	3065	1404	1403	-732	139	1661	2135
chr1	21069953	HP1BP3	ENST00000312239.5	2.62594	3138	2999	2998	1337	1336	-799	139	1661	2135
chr1	21070033	HP1BP3	ENST00000312239.5	2.58848	3058	2919	2918	1257	1256	-879	139	1661	2135
chr1	21070049	HP1BP3	ENST00000312239.5	2.58099	3042	2903	2902	1241	1240	-895	139	1661	2135
chr1	21070259	HP1BP3	ENST00000312239.5	2.48268	2832	2693	2692	1031	1030	-1105	139	1661	2135
chr1	21070498	HP1BP3	ENST00000312239.5	2.37079	2593	2454	2453	792	791	-1344	139	1661	2135
chr1	21070553	HP1BP3	ENST00000312239.5	2.34504	2538	2399	2398	737	736	-1399	139	1661	2135
chr1	21070604	HP1BP3	ENST00000312239.5	2.32116	2487	2348	2347	686	685	-1450	139	1661	2135
chr1	21070648	HP1BP3	ENST00000312239.5	2.30056	2443	2304	2303	642	641	-1494	139	1661	2135
chr1	21070668	HP1BP3	ENST00000312239.5	2.2912	2423	2284	2283	622	621	-1514	139	1661	2135
chr1	21070682	HP1BP3	ENST00000312239.5	2.28464	2409	2270	2269	608	607	-1528	139	1661	2135
chr1	21070718	HP1BP3	ENST00000312239.5	2.26779	2373	2234	2233	572	571	-1564	139	1661	2135
chr1	21070758	HP1BP3	ENST00000312239.5	2.24906	2333	2194	2193	532	531	-1604	139	1661	2135
chr1	21070760	HP1BP3	ENST00000312239.5	2.24813	2331	2192	2191	530	529	-1606	139	1661	2135
chr1	21071148	HP1BP3	ENST00000312239.5	2.06648	1943	1804	1803	142	141	-1994	139	1661	2135
chr1	21071174	HP1BP3	ENST00000312239.5	2.05431	1917	1778	1777	116	115	-2020	139	1661	2135
chr1	21071196	HP1BP3	ENST00000312239.5	2.04401	1895	1756	1755	94	93	-2042	139	1661	2135
chr1	21071227	HP1BP3	ENST00000312239.5	2.02949	1864	1725	1724	63	62	-2073	139	1661	2135
chr1	21071241	HP1BP3	ENST00000312239.5	2.02294	1850	1711	1710	49	48	-2087	139	1661	2135
chr1	21544497	ECE1	ENST00000415912.2	2.72046	4341	4216	4215	1951	1950	-757	125	2264	2707
chr1	21544829	ECE1	ENST00000415912.2	2.59786	4009	3884	3883	1619	1618	-1089	125	2264	2707
chr1	21546133	ECE1	ENST00000415912.2	2.11632	2705	2580	2579	315	314	-2393	125	2264	2707
chr1	21546142	ECE1	ENST00000415912.2	2.113	2696	2571	2570	306	305	-2402	125	2264	2707
chr1	21546166	ECE1	ENST00000415912.2	2.10414	2672	2547	2546	282	281	-2426	125	2264	2707
chr1	21923260	RAP1GAP	ENST00000290101.4	2.49077	2748	2716	2715	532	531	-552	32	2183	1083
chr1	21923418	RAP1GAP	ENST00000290101.4	2.34502	2590	2558	2557	374	373	-710	32	2183	1083
chr1	23409929	KDM1A	ENST00000356634.3	2.22154	2779	2631	2630	72	71	-253	148	2558	324
chr1	23410069	KDM1A	ENST00000356634.3	2.65231	2919	2771	2770	212	211	-113	148	2558	324
chr1	23410072	KDM1A	ENST00000356634.3	2.66154	2922	2774	2773	215	214	-110	148	2558	324
chr1	23411702	LUZP1	ENST00000302291.4	2.75766	7718	6917	6916	3686	3685	-1179	801	3230	4864
chr1	23636690	HNRNPR	ENST00000302271.6	2.38589	2219	2159	2158	257	256	-409	60	1901	665
chr1	23636893	HNRNPR	ENST00000302271.6	2.08108	2016	1956	1955	54	53	-612	60	1901	665
chr1	23686552	ZNF436	ENST00000314011.4	2.75764	3459	3323	3322	1910	1909	-611	136	1412	2520
chr1	23833173	E2F2	ENST00000361729.2	2.92725	4939	4513	4512	3199	3198	-251	426	1313	3449
chr1	23833210	E2F2	ENST00000361729.2	2.91652	4902	4476	4475	3162	3161	-288	426	1313	3449
chr1	23833240	E2F2	ENST00000361729.2	2.90783	4872	4446	4445	3132	3131	-318	426	1313	3449
chr1	23833368	E2F2	ENST00000361729.2	2.87072	4744	4318	4317	3004	3003	-446	426	1313	3449
chr1	23833468	E2F2	ENST00000361729.2	2.84174	4644	4218	4217	2904	2903	-546	426	1313	3449
chr1	23833644	E2F2	ENST00000361729.2	2.79072	4468	4042	4041	2728	2727	-722	426	1313	3449
chr1	23833664	E2F2	ENST00000361729.2	2.78493	4448	4022	4021	2708	2707	-742	426	1313	3449
chr1	23833688	E2F2	ENST00000361729.2	2.77797	4424	3998	3997	2684	2683	-766	426	1313	3449
chr1	23833696	E2F2	ENST00000361729.2	2.77565	4416	3990	3989	2676	2675	-774	426	1313	3449
chr1	23833705	E2F2	ENST00000361729.2	2.77304	4407	3981	3980	2667	2666	-783	426	1313	3449
chr1	23833746	E2F2	ENST00000361729.2	2.76116	4366	3940	3939	2626	2625	-824	426	1313	3449
chr1	23833869	E2F2	ENST00000361729.2	2.72551	4243	3817	3816	2503	2502	-947	426	1313	3449
chr1	23833875	E2F2	ENST00000361729.2	2.72377	4237	3811	3810	2497	2496	-953	426	1313	3449
chr1	23833881	E2F2	ENST00000361729.2	2.72203	4231	3805	3804	2491	2490	-959	426	1313	3449
chr1	23833903	E2F2	ENST00000361729.2	2.71565	4209	3783	3782	2469	2468	-981	426	1313	3449
chr1	23833909	E2F2	ENST00000361729.2	2.71391	4203	3777	3776	2463	2462	-987	426	1313	3449
chr1	23833944	E2F2	ENST00000361729.2	2.70377	4168	3742	3741	2428	2427	-1022	426	1313	3449
chr1	23833959	E2F2	ENST00000361729.2	2.69942	4153	3727	3726	2413	2412	-1037	426	1313	3449
chr1	23884489	ID3	ENST00000374561.5	2.84704	1170	803	802	443	442	-80	367	359	522
chr1	23884619	ID3	ENST00000374561.5	2.59847	1040	673	672	313	312	-210	367	359	522
chr1	23884748	ID3	ENST00000374561.5	2.35182	911	544	543	184	183	-339	367	359	522
chr1	24086065	TCEB3	ENST00000418390.2	2.0008	2669	2399	2398	2	1	-2484	270	2396	2485
chr1	24086108	TCEB3	ENST00000418390.2	2.0181	2712	2442	2441	45	44	-2441	270	2396	2485
chr1	24086252	TCEB3	ENST00000418390.2	2.07603	2856	2586	2585	189	188	-2297	270	2396	2485
chr1	24087651	TCEB3	ENST00000418390.2	2.63878	4255	3985	3984	1588	1587	-898	270	2396	2485
chr1	24087719	TCEB3	ENST00000418390.2	2.66613	4323	4053	4052	1656	1655	-830	270	2396	2485
chr1	24114135	PITHD1	ENST00000246151.4	2.31425	1015	905	904	269	268	-587	110	635	855
chr1	24114167	PITHD1	ENST00000246151.4	2.35164	1047	937	936	301	300	-555	110	635	855
chr1	24121620	LYPLA2	ENST00000374501.1	2.73028	969	893	892	398	397	-147	76	494	544
chr1	24128447	HMGCL	ENST00000374483.4	2.87847	2080	1409	1408	506	505	-70	671	902	575
chr1	24128535	HMGCL	ENST00000374483.4	2.72569	1992	1321	1320	418	417	-158	671	902	575
chr1	24128542	HMGCL	ENST00000374483.4	2.71354	1985	1314	1313	411	410	-165	671	902	575
chr1	24128580	HMGCL	ENST00000374483.4	2.64757	1947	1276	1275	373	372	-203	671	902	575
chr1	24128630	HMGCL	ENST00000374483.4	2.56076	1897	1226	1225	323	322	-253	671	902	575
chr1	24128711	HMGCL	ENST00000374483.4	2.42014	1816	1145	1144	242	241	-334	671	902	575
chr1	24128827	HMGCL	ENST00000374483.4	2.21875	1700	1029	1028	126	125	-450	671	902	575
chr1	24128829	HMGCL	ENST00000374483.4	2.21528	1698	1027	1026	124	123	-452	671	902	575
chr1	24128846	HMGCL	ENST00000374483.4	2.18576	1681	1010	1009	107	106	-469	671	902	575
chr1	24128892	HMGCL	ENST00000374483.4	2.1059	1635	964	963	61	60	-515	671	902	575
chr1	24128901	HMGCL	ENST00000374483.4	2.09028	1626	955	954	52	51	-524	671	902	575
chr1	24128903	HMGCL	ENST00000374483.4	2.08681	1624	953	952	50	49	-526	671	902	575
chr1	24171701	FUCA1	ENST00000374479.3	2.78997	1912	1905	1904	504	503	-134	7	1400	637
chr1	24171788	FUCA1	ENST00000374479.3	2.65361	1825	1818	1817	417	416	-221	7	1400	637
chr1	24171884	FUCA1	ENST00000374479.3	2.50313	1729	1722	1721	321	320	-317	7	1400	637
chr1	24171907	FUCA1	ENST00000374479.3	2.46708	1706	1699	1698	298	297	-340	7	1400	637
chr1	24171964	FUCA1	ENST00000374479.3	2.37774	1649	1642	1641	241	240	-397	7	1400	637
chr1	24171994	FUCA1	ENST00000374479.3	2.33072	1619	1612	1611	211	210	-427	7	1400	637
chr1	24171999	FUCA1	ENST00000374479.3	2.32288	1614	1607	1606	206	205	-432	7	1400	637
chr1	24172082	FUCA1	ENST00000374479.3	2.19279	1531	1524	1523	123	122	-515	7	1400	637
chr1	24172104	FUCA1	ENST00000374479.3	2.15831	1509	1502	1501	101	100	-537	7	1400	637
chr1	24172107	FUCA1	ENST00000374479.3	2.15361	1506	1499	1498	98	97	-540	7	1400	637
chr1	24172109	FUCA1	ENST00000374479.3	2.15047	1504	1497	1496	96	95	-542	7	1400	637
chr1	24172121	FUCA1	ENST00000374479.3	2.13166	1492	1485	1484	84	83	-554	7	1400	637
chr1	24172124	FUCA1	ENST00000374479.3	2.12696	1489	1482	1481	81	80	-557	7	1400	637
chr1	24172131	FUCA1	ENST00000374479.3	2.11599	1482	1475	1474	74	73	-564	7	1400	637
chr1	24172146	FUCA1	ENST00000374479.3	2.09248	1467	1460	1459	59	58	-579	7	1400	637
chr1	24172148	FUCA1	ENST00000374479.3	2.08934	1465	1458	1457	57	56	-581	7	1400	637
chr1	24292889	SRSF10	ENST00000344989.6	2.44211	1891	1816	1815	1264	1263	-1595	75	551	2858
chr1	24683794	STPG1	ENST00000003583.8	2.80559	2244	2103	2102	1239	1238	-299	141	863	1537
chr1	24683821	STPG1	ENST00000003583.8	2.78804	2217	2076	2075	1212	1211	-326	141	863	1537
chr1	24683965	STPG1	ENST00000003583.8	2.69441	2073	1932	1931	1068	1067	-470	141	863	1537
chr1	24684125	STPG1	ENST00000003583.8	2.59038	1913	1772	1771	908	907	-630	141	863	1537
chr1	24684149	STPG1	ENST00000003583.8	2.57477	1889	1748	1747	884	883	-654	141	863	1537
chr1	24684171	STPG1	ENST00000003583.8	2.56047	1867	1726	1725	862	861	-676	141	863	1537
chr1	24684347	STPG1	ENST00000003583.8	2.44603	1691	1550	1549	686	685	-852	141	863	1537
chr1	24684419	STPG1	ENST00000003583.8	2.39922	1619	1478	1477	614	613	-924	141	863	1537
chr1	24684447	STPG1	ENST00000003583.8	2.38101	1591	1450	1449	586	585	-952	141	863	1537
chr1	24684556	STPG1	ENST00000003583.8	2.31014	1482	1341	1340	477	476	-1061	141	863	1537
chr1	24684573	STPG1	ENST00000003583.8	2.29909	1465	1324	1323	460	459	-1078	141	863	1537
chr1	24684586	STPG1	ENST00000003583.8	2.29064	1452	1311	1310	447	446	-1091	141	863	1537
chr1	24684606	STPG1	ENST00000003583.8	2.27763	1432	1291	1290	427	426	-1111	141	863	1537
chr1	24684674	STPG1	ENST00000003583.8	2.23342	1364	1223	1222	359	358	-1179	141	863	1537
chr1	24684909	STPG1	ENST00000003583.8	2.08062	1129	988	987	124	123	-1414	141	863	1537
chr1	24684929	STPG1	ENST00000003583.8	2.06762	1109	968	967	104	103	-1434	141	863	1537
chr1	24684964	STPG1	ENST00000003583.8	2.04486	1074	933	932	69	68	-1469	141	863	1537
chr1	24684965	STPG1	ENST00000003583.8	2.04421	1073	932	931	68	67	-1470	141	863	1537
chr1	24685007	STPG1	ENST00000003583.8	2.01691	1031	890	889	26	25	-1512	141	863	1537
chr1	24685022	STPG1	ENST00000003583.8	2.00715	1016	875	874	11	10	-1527	141	863	1537
chr1	24685024	STPG1	ENST00000003583.8	2.00585	1014	873	872	9	8	-1529	141	863	1537
chr1	24798750	NIPAL3	ENST00000003912.3	2.81113	4764	4050	4049	3075	3074	-716	714	974	3790
chr1	24798866	NIPAL3	ENST00000003912.3	2.84173	4880	4166	4165	3191	3190	-600	714	974	3790
chr1	24798995	NIPAL3	ENST00000003912.3	2.87576	5009	4295	4294	3320	3319	-471	714	974	3790
chr1	24799041	NIPAL3	ENST00000003912.3	2.88789	5055	4341	4340	3366	3365	-425	714	974	3790
chr1	24799042	NIPAL3	ENST00000003912.3	2.88816	5056	4342	4341	3367	3366	-424	714	974	3790
chr1	24799116	NIPAL3	ENST00000003912.3	2.90768	5130	4416	4415	3441	3440	-350	714	974	3790
chr1	24799179	NIPAL3	ENST00000003912.3	2.92429	5193	4479	4478	3504	3503	-287	714	974	3790
chr1	24799184	NIPAL3	ENST00000003912.3	2.92561	5198	4484	4483	3509	3508	-282	714	974	3790
chr1	24799294	NIPAL3	ENST00000003912.3	2.95463	5308	4594	4593	3619	3618	-172	714	974	3790
chr1	24799377	NIPAL3	ENST00000003912.3	2.97652	5391	4677	4676	3702	3701	-89	714	974	3790
chr1	24861983	RCAN3	ENST00000374395.4	2.03748	1254	942	941	216	215	-5547	312	725	5762
chr1	24862038	RCAN3	ENST00000374395.4	2.04702	1309	997	996	271	270	-5492	312	725	5762
chr1	24862143	RCAN3	ENST00000374395.4	2.06524	1414	1102	1101	376	375	-5387	312	725	5762
chr1	24862218	RCAN3	ENST00000374395.4	2.07826	1489	1177	1176	451	450	-5312	312	725	5762
chr1	24862247	RCAN3	ENST00000374395.4	2.08329	1518	1206	1205	480	479	-5283	312	725	5762
chr1	24862256	RCAN3	ENST00000374395.4	2.08485	1527	1215	1214	489	488	-5274	312	725	5762
chr1	24862384	RCAN3	ENST00000374395.4	2.10706	1655	1343	1342	617	616	-5146	312	725	5762
chr1	24862470	RCAN3	ENST00000374395.4	2.12199	1741	1429	1428	703	702	-5060	312	725	5762
chr1	24862623	RCAN3	ENST00000374395.4	2.14853	1894	1582	1581	856	855	-4907	312	725	5762
chr1	24862685	RCAN3	ENST00000374395.4	2.15929	1956	1644	1643	918	917	-4845	312	725	5762
chr1	24999149	SRRM1	ENST00000323848.9	2.3792	3401	3087	3086	372	371	-609	314	2714	980
chr1	24999291	SRRM1	ENST00000323848.9	2.52396	3543	3229	3228	514	513	-467	314	2714	980
chr1	24999662	SRRM1	ENST00000323848.9	2.90214	3914	3600	3599	885	884	-96	314	2714	980
chr1	25167597	CLIC4	ENST00000374379.4	2.0499	1127	931	930	169	168	-3218	196	761	3386
chr1	25167675	CLIC4	ENST00000374379.4	2.07293	1205	1009	1008	247	246	-3140	196	761	3386
chr1	25167694	CLIC4	ENST00000374379.4	2.07854	1224	1028	1027	266	265	-3121	196	761	3386
chr1	25167765	CLIC4	ENST00000374379.4	2.0995	1295	1099	1098	337	336	-3050	196	761	3386
chr1	25167934	CLIC4	ENST00000374379.4	2.14939	1464	1268	1267	506	505	-2881	196	761	3386
chr1	25168016	CLIC4	ENST00000374379.4	2.1736	1546	1350	1349	588	587	-2799	196	761	3386
chr1	25168024	CLIC4	ENST00000374379.4	2.17597	1554	1358	1357	596	595	-2791	196	761	3386
chr1	25168130	CLIC4	ENST00000374379.4	2.20726	1660	1464	1463	702	701	-2685	196	761	3386
chr1	25168156	CLIC4	ENST00000374379.4	2.21494	1686	1490	1489	728	727	-2659	196	761	3386
chr1	25168170	CLIC4	ENST00000374379.4	2.21907	1700	1504	1503	742	741	-2645	196	761	3386
chr1	25168187	CLIC4	ENST00000374379.4	2.22409	1717	1521	1520	759	758	-2628	196	761	3386
chr1	25168200	CLIC4	ENST00000374379.4	2.22793	1730	1534	1533	772	771	-2615	196	761	3386
chr1	25168232	CLIC4	ENST00000374379.4	2.23738	1762	1566	1565	804	803	-2583	196	761	3386
chr1	25168241	CLIC4	ENST00000374379.4	2.24004	1771	1575	1574	813	812	-2574	196	761	3386
chr1	25168284	CLIC4	ENST00000374379.4	2.25273	1814	1618	1617	856	855	-2531	196	761	3386
chr1	25168660	CLIC4	ENST00000374379.4	2.36374	2190	1994	1993	1232	1231	-2155	196	761	3386
chr1	25168846	CLIC4	ENST00000374379.4	2.41866	2376	2180	2179	1418	1417	-1969	196	761	3386
chr1	25169462	CLIC4	ENST00000374379.4	2.60053	2992	2796	2795	2034	2033	-1353	196	761	3386
chr1	25169813	CLIC4	ENST00000374379.4	2.70416	3343	3147	3146	2385	2384	-1002	196	761	3386
chr1	25169852	CLIC4	ENST00000374379.4	2.71568	3382	3186	3185	2424	2423	-963	196	761	3386
chr1	25169935	CLIC4	ENST00000374379.4	2.74018	3465	3269	3268	2507	2506	-880	196	761	3386
chr1	25170276	CLIC4	ENST00000374379.4	2.84086	3806	3610	3609	2848	2847	-539	196	761	3386
chr1	25549332	SYF2	ENST00000236273.4	2.72402	1182	1157	1156	425	424	-162	25	731	586
chr1	25549361	SYF2	ENST00000236273.4	2.67462	1153	1128	1127	396	395	-191	25	731	586
chr1	25549674	SYF2	ENST00000236273.4	2.1414	840	815	814	83	82	-504	25	731	586
chr1	25568935	C1orf63	ENST00000243189.7	2.41193	1294	1018	1017	145	144	-207	276	872	351
chr1	25569040	C1orf63	ENST00000243189.7	2.11364	1189	913	912	40	39	-312	276	872	351
chr1	25687367	TMEM50A	ENST00000374358.4	2.10326	1197	645	644	171	170	-1485	552	473	1655
chr1	25687680	TMEM50A	ENST00000374358.4	2.29227	1510	958	957	484	483	-1172	552	473	1655
chr1	25687948	TMEM50A	ENST00000374358.4	2.45411	1778	1226	1225	752	751	-904	552	473	1655
chr1	25687974	TMEM50A	ENST00000374358.4	2.46981	1804	1252	1251	778	777	-878	552	473	1655
chr1	25688005	TMEM50A	ENST00000374358.4	2.48853	1835	1283	1282	809	808	-847	552	473	1655
chr1	25688071	TMEM50A	ENST00000374358.4	2.52838	1901	1349	1348	875	874	-781	552	473	1655
chr1	25688130	TMEM50A	ENST00000374358.4	2.56401	1960	1408	1407	934	933	-722	552	473	1655
chr1	25688147	TMEM50A	ENST00000374358.4	2.57428	1977	1425	1424	951	950	-705	552	473	1655
chr1	25688357	TMEM50A	ENST00000374358.4	2.70109	2187	1635	1634	1161	1160	-495	552	473	1655
chr1	25688360	TMEM50A	ENST00000374358.4	2.7029	2190	1638	1637	1164	1163	-492	552	473	1655
chr1	25688437	TMEM50A	ENST00000374358.4	2.7494	2267	1715	1714	1241	1240	-415	552	473	1655
chr1	25688492	TMEM50A	ENST00000374358.4	2.78261	2322	1770	1769	1296	1295	-360	552	473	1655
chr1	25688518	TMEM50A	ENST00000374358.4	2.79831	2348	1796	1795	1322	1321	-334	552	473	1655
chr1	25688521	TMEM50A	ENST00000374358.4	2.80012	2351	1799	1798	1325	1324	-331	552	473	1655
chr1	25893503	LDLRAP1	ENST00000374338.4	2.01056	1065	947	946	20	19	-1874	118	926	1893
chr1	25893518	LDLRAP1	ENST00000374338.4	2.01848	1080	962	961	35	34	-1859	118	926	1893
chr1	25894645	LDLRAP1	ENST00000374338.4	2.61352	2207	2089	2088	1162	1161	-732	118	926	1893
chr1	26144046	SEPN1	ENST00000354177.4	2.73363	3562	3508	3507	1837	1836	-667	54	1670	2503
chr1	26158537	MTFR1L	ENST00000374300.3	2.02193	1160	899	898	20	19	-892	261	878	911
chr1	26158580	MTFR1L	ENST00000374300.3	2.06908	1203	942	941	63	62	-849	261	878	911
chr1	26158685	MTFR1L	ENST00000374300.3	2.18421	1308	1047	1046	168	167	-744	261	878	911
chr1	26158746	MTFR1L	ENST00000374300.3	2.2511	1369	1108	1107	229	228	-683	261	878	911
chr1	26158794	MTFR1L	ENST00000374300.3	2.30373	1417	1156	1155	277	276	-635	261	878	911
chr1	26158843	MTFR1L	ENST00000374300.3	2.35746	1466	1205	1204	326	325	-586	261	878	911
chr1	26158855	MTFR1L	ENST00000374300.3	2.37061	1478	1217	1216	338	337	-574	261	878	911
chr1	26158879	MTFR1L	ENST00000374300.3	2.39693	1502	1241	1240	362	361	-550	261	878	911
chr1	26159005	MTFR1L	ENST00000374300.3	2.53509	1628	1367	1366	488	487	-424	261	878	911
chr1	26159009	MTFR1L	ENST00000374300.3	2.53947	1632	1371	1370	492	491	-420	261	878	911
chr1	26159046	MTFR1L	ENST00000374300.3	2.58004	1669	1408	1407	529	528	-383	261	878	911
chr1	26159080	MTFR1L	ENST00000374300.3	2.61732	1703	1442	1441	563	562	-349	261	878	911
chr1	26159125	MTFR1L	ENST00000374300.3	2.66667	1748	1487	1486	608	607	-304	261	878	911
chr1	26159372	MTFR1L	ENST00000374300.3	2.9375	1995	1734	1733	855	854	-57	261	878	911
chr1	26160656	AUNIP	ENST00000374298.3	2.83891	1956	1902	1901	828	827	-159	54	1073	986
chr1	26160753	AUNIP	ENST00000374298.3	2.74063	1859	1805	1804	731	730	-256	54	1073	986
chr1	26161148	AUNIP	ENST00000374298.3	2.34043	1464	1410	1409	336	335	-651	54	1073	986
chr1	26188197	PAQR7	ENST00000374296.3	2.68785	2800	2134	2133	1093	1092	-496	666	1040	1588
chr1	26188221	PAQR7	ENST00000374296.3	2.67275	2776	2110	2109	1069	1068	-520	666	1040	1588
chr1	26188415	PAQR7	ENST00000374296.3	2.55066	2582	1916	1915	875	874	-714	666	1040	1588
chr1	26188426	PAQR7	ENST00000374296.3	2.54374	2571	1905	1904	864	863	-725	666	1040	1588
chr1	26188450	PAQR7	ENST00000374296.3	2.52863	2547	1881	1880	840	839	-749	666	1040	1588
chr1	26188457	PAQR7	ENST00000374296.3	2.52423	2540	1874	1873	833	832	-756	666	1040	1588
chr1	26226770	STMN1	ENST00000399728.1	2.82071	1550	1187	1186	737	736	-161	363	449	897
chr1	26226936	STMN1	ENST00000399728.1	2.63586	1384	1021	1020	571	570	-327	363	449	897
chr1	26226948	STMN1	ENST00000399728.1	2.62249	1372	1009	1008	559	558	-339	363	449	897
chr1	26227044	STMN1	ENST00000399728.1	2.51559	1276	913	912	463	462	-435	363	449	897
chr1	26227047	STMN1	ENST00000399728.1	2.51225	1273	910	909	460	459	-438	363	449	897
chr1	26227138	STMN1	ENST00000399728.1	2.41091	1182	819	818	369	368	-529	363	449	897
chr1	26449116	PDIK1L	ENST00000374269.1	2.03297	1157	1074	1073	48	47	-1408	83	1025	1455
chr1	26449162	PDIK1L	ENST00000374269.1	2.06456	1203	1120	1119	94	93	-1362	83	1025	1455
chr1	26449206	PDIK1L	ENST00000374269.1	2.09478	1247	1164	1163	138	137	-1318	83	1025	1455
chr1	26449223	PDIK1L	ENST00000374269.1	2.10646	1264	1181	1180	155	154	-1301	83	1025	1455
chr1	26449264	PDIK1L	ENST00000374269.1	2.13462	1305	1222	1221	196	195	-1260	83	1025	1455
chr1	26449656	PDIK1L	ENST00000374269.1	2.40385	1697	1614	1613	588	587	-868	83	1025	1455
chr1	26449743	PDIK1L	ENST00000374269.1	2.4636	1784	1701	1700	675	674	-781	83	1025	1455
chr1	26449957	PDIK1L	ENST00000374269.1	2.61058	1998	1915	1914	889	888	-567	83	1025	1455
chr1	26449978	PDIK1L	ENST00000374269.1	2.625	2019	1936	1935	910	909	-546	83	1025	1455
chr1	26450032	PDIK1L	ENST00000374269.1	2.66209	2073	1990	1989	964	963	-492	83	1025	1455
chr1	26450047	PDIK1L	ENST00000374269.1	2.67239	2088	2005	2004	979	978	-477	83	1025	1455
chr1	26450082	PDIK1L	ENST00000374269.1	2.69643	2123	2040	2039	1014	1013	-442	83	1025	1455
chr1	26450105	PDIK1L	ENST00000374269.1	2.71223	2146	2063	2062	1037	1036	-419	83	1025	1455
chr1	26450176	PDIK1L	ENST00000374269.1	2.76099	2217	2134	2133	1108	1107	-348	83	1025	1455
chr1	26450396	PDIK1L	ENST00000374269.1	2.91209	2437	2354	2353	1328	1327	-128	83	1025	1455
chr1	26450486	PDIK1L	ENST00000374269.1	2.9739	2527	2444	2443	1418	1417	-38	83	1025	1455
chr1	26450491	PDIK1L	ENST00000374269.1	2.97734	2532	2449	2448	1423	1422	-33	83	1025	1455
chr1	26497253	ZNF593	ENST00000270812.5	2.05394	586	545	544	74	73	-1298	41	470	1371
chr1	26497261	ZNF593	ENST00000270812.5	2.05977	594	553	552	82	81	-1290	41	470	1371
chr1	26497324	ZNF593	ENST00000270812.5	2.10569	657	616	615	145	144	-1227	41	470	1371
chr1	26497356	ZNF593	ENST00000270812.5	2.12901	689	648	647	177	176	-1195	41	470	1371
chr1	26604637	CEP85	ENST00000252992.4	2.56304	3272	3142	3141	853	852	-662	130	2288	1514
chr1	26604831	CEP85	ENST00000252992.4	2.69109	3466	3336	3335	1047	1046	-468	130	2288	1514
chr1	26605038	CEP85	ENST00000252992.4	2.82772	3673	3543	3542	1254	1253	-261	130	2288	1514
chr1	26607656	SH3BGRL3	ENST00000270792.5	2.10687	1303	324	323	42	41	-351	979	281	392
chr1	26607697	SH3BGRL3	ENST00000270792.5	2.2112	1344	365	364	83	82	-310	979	281	392
chr1	26607701	SH3BGRL3	ENST00000270792.5	2.22137	1348	369	368	87	86	-306	979	281	392
chr1	26795841	DHDDS	ENST00000236342.7	2.71104	1313	1221	1220	219	218	-89	92	1001	307
chr1	26900947	RPS6KA1	ENST00000374166.4	2.31365	2572	2430	2429	255	254	-558	142	2174	812
chr1	26901100	RPS6KA1	ENST00000374166.4	2.50185	2725	2583	2582	408	407	-405	142	2174	812
chr1	27107248	ARID1A	ENST00000324856.7	2.00074	7229	6859	6858	1	0	-1347	370	6857	1347
chr1	27107261	ARID1A	ENST00000324856.7	2.01039	7242	6872	6871	14	13	-1334	370	6857	1347
chr1	27107305	ARID1A	ENST00000324856.7	2.04303	7286	6916	6915	58	57	-1290	370	6857	1347
chr1	27107333	ARID1A	ENST00000324856.7	2.0638	7314	6944	6943	86	85	-1262	370	6857	1347
chr1	27107339	ARID1A	ENST00000324856.7	2.06825	7320	6950	6949	92	91	-1256	370	6857	1347
chr1	27107345	ARID1A	ENST00000324856.7	2.0727	7326	6956	6955	98	97	-1250	370	6857	1347
chr1	27107373	ARID1A	ENST00000324856.7	2.09347	7354	6984	6983	126	125	-1222	370	6857	1347
chr1	27107503	ARID1A	ENST00000324856.7	2.18991	7484	7114	7113	256	255	-1092	370	6857	1347
chr1	27107517	ARID1A	ENST00000324856.7	2.2003	7498	7128	7127	270	269	-1078	370	6857	1347
chr1	27107632	ARID1A	ENST00000324856.7	2.28561	7613	7243	7242	385	384	-963	370	6857	1347
chr1	27107733	ARID1A	ENST00000324856.7	2.36053	7714	7344	7343	486	485	-862	370	6857	1347
chr1	27107848	ARID1A	ENST00000324856.7	2.44585	7829	7459	7458	601	600	-747	370	6857	1347
chr1	27107855	ARID1A	ENST00000324856.7	2.45104	7836	7466	7465	608	607	-740	370	6857	1347
chr1	27107996	ARID1A	ENST00000324856.7	2.55564	7977	7607	7606	749	748	-599	370	6857	1347
chr1	27108128	ARID1A	ENST00000324856.7	2.65356	8109	7739	7738	881	880	-467	370	6857	1347
chr1	27108185	ARID1A	ENST00000324856.7	2.69585	8166	7796	7795	938	937	-410	370	6857	1347
chr1	27124336	PIGV	ENST00000078527.4	2.00181	1813	1483	1482	1	0	-553	330	1481	553
chr1	27124344	PIGV	ENST00000078527.4	2.01625	1821	1491	1490	9	8	-545	330	1481	553
chr1	27124397	PIGV	ENST00000078527.4	2.11191	1874	1544	1543	62	61	-492	330	1481	553
chr1	27124399	PIGV	ENST00000078527.4	2.11552	1876	1546	1545	64	63	-490	330	1481	553
chr1	27124453	PIGV	ENST00000078527.4	2.213	1930	1600	1599	118	117	-436	330	1481	553
chr1	27124499	PIGV	ENST00000078527.4	2.29603	1976	1646	1645	164	163	-390	330	1481	553
chr1	27124589	PIGV	ENST00000078527.4	2.45848	2066	1736	1735	254	253	-300	330	1481	553
chr1	27124614	PIGV	ENST00000078527.4	2.50361	2091	1761	1760	279	278	-275	330	1481	553
chr1	27181083	ZDHHC18	ENST00000374142.4	2.19931	2010	1916	1915	749	748	-3009	94	1166	3757
chr1	27203027	GPN2	ENST00000374135.4	2.88629	4274	4074	4073	3141	3140	-403	200	932	3543
chr1	27203075	GPN2	ENST00000374135.4	2.87274	4226	4026	4025	3093	3092	-451	200	932	3543
chr1	27217442	GPATCH3	ENST00000361720.5	2.11324	1660	1637	1636	59	58	-462	23	1577	520
chr1	27217500	GPATCH3	ENST00000361720.5	2.00192	1602	1579	1578	1	0	-520	23	1577	520
chr1	27273039	NUDC	ENST00000321265.5	2.53891	1485	1363	1362	367	366	-314	122	995	680
chr1	27273188	NUDC	ENST00000321265.5	2.75771	1634	1512	1511	516	515	-165	122	995	680
chr1	27662184	TMEM222	ENST00000374076.4	2.24304	891	854	853	227	226	-707	37	626	933
chr1	27662325	TMEM222	ENST00000374076.4	2.394	1032	995	994	368	367	-566	37	626	933
chr1	27662375	TMEM222	ENST00000374076.4	2.44754	1082	1045	1044	418	417	-516	37	626	933
chr1	27662377	TMEM222	ENST00000374076.4	2.44968	1084	1047	1046	420	419	-514	37	626	933
chr1	27662412	TMEM222	ENST00000374076.4	2.48715	1119	1082	1081	455	454	-479	37	626	933
chr1	27662662	TMEM222	ENST00000374076.4	2.75482	1369	1332	1331	705	704	-229	37	626	933
chr1	27662775	TMEM222	ENST00000374076.4	2.8758	1482	1445	1444	818	817	-116	37	626	933
chr1	27662790	TMEM222	ENST00000374076.4	2.89186	1497	1460	1459	833	832	-101	37	626	933
chr1	27662798	TMEM222	ENST00000374076.4	2.90043	1505	1468	1467	841	840	-93	37	626	933
chr1	27730866	WASF2	ENST00000430629.2	2.9656	5529	5314	5313	3817	3816	-136	215	1496	3952
chr1	27731317	WASF2	ENST00000430629.2	2.85151	5078	4863	4862	3366	3365	-587	215	1496	3952
chr1	27731345	WASF2	ENST00000430629.2	2.84442	5050	4835	4834	3338	3337	-615	215	1496	3952
chr1	27731911	WASF2	ENST00000430629.2	2.70124	4484	4269	4268	2772	2771	-1181	215	1496	3952
chr1	27731953	WASF2	ENST00000430629.2	2.69061	4442	4227	4226	2730	2729	-1223	215	1496	3952
chr1	27732064	WASF2	ENST00000430629.2	2.66253	4331	4116	4115	2619	2618	-1334	215	1496	3952
chr1	27732091	WASF2	ENST00000430629.2	2.6557	4304	4089	4088	2592	2591	-1361	215	1496	3952
chr1	27733324	WASF2	ENST00000430629.2	2.34379	3071	2856	2855	1359	1358	-2594	215	1496	3952
chr1	28087814	FAM76A	ENST00000373949.1	2.52205	1611	1559	1558	722	721	-661	52	836	1382
chr1	28087819	FAM76A	ENST00000373949.1	2.52567	1616	1564	1563	727	726	-656	52	836	1382
chr1	28148907	STX12	ENST00000373943.4	2.03156	1022	898	897	67	66	-2056	124	830	2122
chr1	28148916	STX12	ENST00000373943.4	2.0358	1031	907	906	76	75	-2047	124	830	2122
chr1	28149136	STX12	ENST00000373943.4	2.13943	1251	1127	1126	296	295	-1827	124	830	2122
chr1	28149333	STX12	ENST00000373943.4	2.23222	1448	1324	1323	493	492	-1630	124	830	2122
chr1	28149504	STX12	ENST00000373943.4	2.31276	1619	1495	1494	664	663	-1459	124	830	2122
chr1	28149524	STX12	ENST00000373943.4	2.32219	1639	1515	1514	684	683	-1439	124	830	2122
chr1	28150305	STX12	ENST00000373943.4	2.69006	2420	2296	2295	1465	1464	-658	124	830	2122
chr1	28150340	STX12	ENST00000373943.4	2.70655	2455	2331	2330	1500	1499	-623	124	830	2122
chr1	28150369	STX12	ENST00000373943.4	2.72021	2484	2360	2359	1529	1528	-594	124	830	2122
chr1	28150399	STX12	ENST00000373943.4	2.73434	2514	2390	2389	1559	1558	-564	124	830	2122
chr1	28150431	STX12	ENST00000373943.4	2.74941	2546	2422	2421	1591	1590	-532	124	830	2122
chr1	28150615	STX12	ENST00000373943.4	2.83608	2730	2606	2605	1775	1774	-348	124	830	2122
chr1	28150679	STX12	ENST00000373943.4	2.86623	2794	2670	2669	1839	1838	-284	124	830	2122
chr1	28150696	STX12	ENST00000373943.4	2.87423	2811	2687	2686	1856	1855	-267	124	830	2122
chr1	28212535	THEMIS2	ENST00000328928.7	2.13368	1674	1647	1646	102	101	-661	27	1544	762
chr1	28212547	THEMIS2	ENST00000328928.7	2.14941	1686	1659	1658	114	113	-649	27	1544	762
chr1	28212605	THEMIS2	ENST00000328928.7	2.22543	1744	1717	1716	172	171	-591	27	1544	762
chr1	28212619	THEMIS2	ENST00000328928.7	2.24377	1758	1731	1730	186	185	-577	27	1544	762
chr1	28212645	THEMIS2	ENST00000328928.7	2.27785	1784	1757	1756	212	211	-551	27	1544	762
chr1	28218081	RPA2	ENST00000373912.3	2.92801	1705	1406	1405	593	592	-46	299	812	638
chr1	28218673	RPA2	ENST00000373912.3	2.00156	1113	814	813	1	0	-638	299	812	638
chr1	28293801	XKR8	ENST00000373884.5	2.10045	1885	1278	1277	90	89	-806	607	1187	895
chr1	28293915	XKR8	ENST00000373884.5	2.22768	1999	1392	1391	204	203	-692	607	1187	895
chr1	28293989	XKR8	ENST00000373884.5	2.31027	2073	1466	1465	278	277	-618	607	1187	895
chr1	28294119	XKR8	ENST00000373884.5	2.45536	2203	1596	1595	408	407	-488	607	1187	895
chr1	28294180	XKR8	ENST00000373884.5	2.52344	2264	1657	1656	469	468	-427	607	1187	895
chr1	28294330	XKR8	ENST00000373884.5	2.69085	2414	1807	1806	619	618	-277	607	1187	895
chr1	28297038	EYA3	ENST00000373871.3	2.9556	5901	5661	5660	3939	3938	-183	240	1721	4121
chr1	28297041	EYA3	ENST00000373871.3	2.95488	5898	5658	5657	3936	3935	-186	240	1721	4121
chr1	28297055	EYA3	ENST00000373871.3	2.95148	5884	5644	5643	3922	3921	-200	240	1721	4121
chr1	28297078	EYA3	ENST00000373871.3	2.9459	5861	5621	5620	3899	3898	-223	240	1721	4121
chr1	28297110	EYA3	ENST00000373871.3	2.93814	5829	5589	5588	3867	3866	-255	240	1721	4121
chr1	28297265	EYA3	ENST00000373871.3	2.90053	5674	5434	5433	3712	3711	-410	240	1721	4121
chr1	28297280	EYA3	ENST00000373871.3	2.89689	5659	5419	5418	3697	3696	-425	240	1721	4121
chr1	28297290	EYA3	ENST00000373871.3	2.89447	5649	5409	5408	3687	3686	-435	240	1721	4121
chr1	28297554	EYA3	ENST00000373871.3	2.83042	5385	5145	5144	3423	3422	-699	240	1721	4121
chr1	28297575	EYA3	ENST00000373871.3	2.82533	5364	5124	5123	3402	3401	-720	240	1721	4121
chr1	28297714	EYA3	ENST00000373871.3	2.79161	5225	4985	4984	3263	3262	-859	240	1721	4121
chr1	28527739	DNAJC8	ENST00000263697.4	2.02894	808	782	781	20	19	-671	26	761	690
chr1	28564278	ATPIF1	ENST00000465645.1	2.79842	1523	1494	1493	1311	1310	-331	29	182	1641
chr1	28607486	SESN2	ENST00000253063.3	2.10243	1936	1616	1615	173	172	-1516	320	1442	1688
chr1	28607493	SESN2	ENST00000253063.3	2.10657	1943	1623	1622	180	179	-1509	320	1442	1688
chr1	28607537	SESN2	ENST00000253063.3	2.13262	1987	1667	1666	224	223	-1465	320	1442	1688
chr1	28607597	SESN2	ENST00000253063.3	2.16815	2047	1727	1726	284	283	-1405	320	1442	1688
chr1	28607713	SESN2	ENST00000253063.3	2.23683	2163	1843	1842	400	399	-1289	320	1442	1688
chr1	28607770	SESN2	ENST00000253063.3	2.27057	2220	1900	1899	457	456	-1232	320	1442	1688
chr1	28607881	SESN2	ENST00000253063.3	2.33629	2331	2011	2010	568	567	-1121	320	1442	1688
chr1	28608022	SESN2	ENST00000253063.3	2.41978	2472	2152	2151	709	708	-980	320	1442	1688
chr1	28608088	SESN2	ENST00000253063.3	2.45885	2538	2218	2217	775	774	-914	320	1442	1688
chr1	28608630	SESN2	ENST00000253063.3	2.77975	3080	2760	2759	1317	1316	-372	320	1442	1688
chr1	28608672	SESN2	ENST00000253063.3	2.80462	3122	2802	2801	1359	1358	-330	320	1442	1688
chr1	28661482	MED18	ENST00000373842.4	2.00101	836	628	627	1	0	-994	208	626	994
chr1	28661499	MED18	ENST00000373842.4	2.01809	853	645	644	18	17	-977	208	626	994
chr1	28661518	MED18	ENST00000373842.4	2.03719	872	664	663	37	36	-958	208	626	994
chr1	28823110	PHACTR4	ENST00000373836.3	2.01304	2401	2188	2187	49	48	-3710	213	2138	3758
chr1	28823142	PHACTR4	ENST00000373836.3	2.02155	2433	2220	2219	81	80	-3678	213	2138	3758
chr1	28823195	PHACTR4	ENST00000373836.3	2.03565	2486	2273	2272	134	133	-3625	213	2138	3758
chr1	28823214	PHACTR4	ENST00000373836.3	2.0407	2505	2292	2291	153	152	-3606	213	2138	3758
chr1	28823220	PHACTR4	ENST00000373836.3	2.0423	2511	2298	2297	159	158	-3600	213	2138	3758
chr1	28823275	PHACTR4	ENST00000373836.3	2.05693	2566	2353	2352	214	213	-3545	213	2138	3758
chr1	28823280	PHACTR4	ENST00000373836.3	2.05826	2571	2358	2357	219	218	-3540	213	2138	3758
chr1	28823315	PHACTR4	ENST00000373836.3	2.06757	2606	2393	2392	254	253	-3505	213	2138	3758
chr1	28823335	PHACTR4	ENST00000373836.3	2.07289	2626	2413	2412	274	273	-3485	213	2138	3758
chr1	28823404	PHACTR4	ENST00000373836.3	2.09125	2695	2482	2481	343	342	-3416	213	2138	3758
chr1	28823598	PHACTR4	ENST00000373836.3	2.14286	2889	2676	2675	537	536	-3222	213	2138	3758
chr1	28823613	PHACTR4	ENST00000373836.3	2.14685	2904	2691	2690	552	551	-3207	213	2138	3758
chr1	28823675	PHACTR4	ENST00000373836.3	2.16334	2966	2753	2752	614	613	-3145	213	2138	3758
chr1	28823687	PHACTR4	ENST00000373836.3	2.16653	2978	2765	2764	626	625	-3133	213	2138	3758
chr1	28864752	RCC1	ENST00000373832.1	2.23873	1680	1499	1498	233	232	-743	181	1265	975
chr1	28864939	RCC1	ENST00000373832.1	2.43033	1867	1686	1685	420	419	-556	181	1265	975
chr1	28864993	RCC1	ENST00000373832.1	2.48566	1921	1740	1739	474	473	-502	181	1265	975
chr1	28904219	TRNAU1AP	ENST00000373830.3	2.07863	960	935	934	71	70	-832	25	863	902
chr1	28904397	TRNAU1AP	ENST00000373830.3	2.27575	1138	1113	1112	249	248	-654	25	863	902
chr1	28904739	TRNAU1AP	ENST00000373830.3	2.65449	1480	1455	1454	591	590	-312	25	863	902
chr1	28929669	TAF12	ENST00000263974.4	2.87215	1302	868	867	382	381	-56	434	485	437
chr1	28929979	TAF12	ENST00000263974.4	2.16438	992	558	557	72	71	-366	434	485	437
chr1	29095560	YTHDF2	ENST00000373812.3	2.11665	2197	1836	1835	96	95	-727	361	1739	822
chr1	29095663	YTHDF2	ENST00000373812.3	2.2418	2300	1939	1938	199	198	-624	361	1739	822
chr1	29095862	YTHDF2	ENST00000373812.3	2.4836	2499	2138	2137	398	397	-425	361	1739	822
chr1	29095994	YTHDF2	ENST00000373812.3	2.64399	2631	2270	2269	530	529	-293	361	1739	822
chr1	29096008	YTHDF2	ENST00000373812.3	2.661	2645	2284	2283	544	543	-279	361	1739	822
chr1	29096014	YTHDF2	ENST00000373812.3	2.66829	2651	2290	2289	550	549	-273	361	1739	822
chr1	29096020	YTHDF2	ENST00000373812.3	2.67558	2657	2296	2295	556	555	-267	361	1739	822
chr1	29096076	YTHDF2	ENST00000373812.3	2.74362	2713	2352	2351	612	611	-211	361	1739	822
chr1	29096110	YTHDF2	ENST00000373812.3	2.78493	2747	2386	2385	646	645	-177	361	1739	822
chr1	29096194	YTHDF2	ENST00000373812.3	2.887	2831	2470	2469	730	729	-93	361	1739	822
chr1	29096197	YTHDF2	ENST00000373812.3	2.89064	2834	2473	2472	733	732	-90	361	1739	822
chr1	29096203	YTHDF2	ENST00000373812.3	2.89793	2840	2479	2478	739	738	-84	361	1739	822
chr1	29096254	YTHDF2	ENST00000373812.3	2.9599	2891	2530	2529	790	789	-33	361	1739	822
chr1	29446217	EPB41	ENST00000343067.4	2.90181	5614	5488	5487	2893	2892	-315	126	2594	3207
chr1	29474784	SRSF4	ENST00000373795.4	2.2069	1857	1623	1622	138	137	-529	234	1484	666
chr1	29519720	MECR	ENST00000373791.3	2.70844	2080	1708	1707	814	813	-335	372	893	1148
chr1	29519789	MECR	ENST00000373791.3	2.64839	2011	1639	1638	745	744	-404	372	893	1148
chr1	29519833	MECR	ENST00000373791.3	2.6101	1967	1595	1594	701	700	-448	372	893	1148
chr1	29519872	MECR	ENST00000373791.3	2.57615	1928	1556	1555	662	661	-487	372	893	1148
chr1	29519890	MECR	ENST00000373791.3	2.56049	1910	1538	1537	644	643	-505	372	893	1148
chr1	29519950	MECR	ENST00000373791.3	2.50827	1850	1478	1477	584	583	-565	372	893	1148
chr1	29520272	MECR	ENST00000373791.3	2.22802	1528	1156	1155	262	261	-887	372	893	1148
chr1	29652463	PTPRU	ENST00000323874.8	2.25439	4728	4619	4618	290	289	-850	109	4328	1139
chr1	29652726	PTPRU	ENST00000323874.8	2.48509	4991	4882	4881	553	552	-587	109	4328	1139
chr1	29652828	PTPRU	ENST00000323874.8	2.57456	5093	4984	4983	655	654	-485	109	4328	1139
chr1	29652845	PTPRU	ENST00000323874.8	2.58947	5110	5001	5000	672	671	-468	109	4328	1139
chr1	29652881	PTPRU	ENST00000323874.8	2.62105	5146	5037	5036	708	707	-432	109	4328	1139
chr1	31342673	SDC3	ENST00000336798.7	2.90411	6032	4540	4539	3385	3384	-359	1492	1154	3743
chr1	31342903	SDC3	ENST00000336798.7	2.84268	5802	4310	4309	3155	3154	-589	1492	1154	3743
chr1	31404548	PUM1	ENST00000257075.5	2.88563	5164	5071	5070	1510	1509	-195	93	3560	1704
chr1	31405194	PUM1	ENST00000257075.5	2.50674	4518	4425	4424	864	863	-841	93	3560	1704
chr1	31405312	PUM1	ENST00000257075.5	2.43754	4400	4307	4306	746	745	-959	93	3560	1704
chr1	31405405	PUM1	ENST00000257075.5	2.38299	4307	4214	4213	653	652	-1052	93	3560	1704
chr1	31405857	PUM1	ENST00000257075.5	2.11789	3855	3762	3761	201	200	-1504	93	3560	1704
chr1	31405935	PUM1	ENST00000257075.5	2.07214	3777	3684	3683	123	122	-1582	93	3560	1704
chr1	31406047	PUM1	ENST00000257075.5	2.00645	3665	3572	3571	11	10	-1694	93	3560	1704
chr1	31732524	SNRNP40	ENST00000263694.4	2.78685	1487	1469	1468	395	394	-107	18	1073	501
chr1	31732565	SNRNP40	ENST00000263694.4	2.70518	1446	1428	1427	354	353	-148	18	1073	501
chr1	31732579	SNRNP40	ENST00000263694.4	2.67729	1432	1414	1413	340	339	-162	18	1073	501
chr1	31732901	SNRNP40	ENST00000263694.4	2.03586	1110	1092	1091	18	17	-484	18	1073	501
chr1	31837148	ZCCHC17	ENST00000344147.5	2.14536	969	834	833	108	107	-635	135	725	742
chr1	31837151	ZCCHC17	ENST00000344147.5	2.14939	972	837	836	111	110	-632	135	725	742
chr1	31837169	ZCCHC17	ENST00000344147.5	2.17362	990	855	854	129	128	-614	135	725	742
chr1	31837489	ZCCHC17	ENST00000344147.5	2.60431	1310	1175	1174	449	448	-294	135	725	742
chr1	31837563	ZCCHC17	ENST00000344147.5	2.7039	1384	1249	1248	523	522	-220	135	725	742
chr1	31837573	ZCCHC17	ENST00000344147.5	2.71736	1394	1259	1258	533	532	-210	135	725	742
chr1	31837693	ZCCHC17	ENST00000344147.5	2.87887	1514	1379	1378	653	652	-90	135	725	742
chr1	31837704	ZCCHC17	ENST00000344147.5	2.89367	1525	1390	1389	664	663	-79	135	725	742
chr1	31837757	ZCCHC17	ENST00000344147.5	2.96501	1578	1443	1442	717	716	-26	135	725	742
chr1	32095565	PEF1	ENST00000373703.4	2.86418	1526	1504	1503	649	648	-102	22	854	750
chr1	32095614	PEF1	ENST00000373703.4	2.79893	1477	1455	1454	600	599	-151	22	854	750
chr1	32095750	PEF1	ENST00000373703.4	2.61784	1341	1319	1318	464	463	-287	22	854	750
chr1	32096047	PEF1	ENST00000373703.4	2.22237	1044	1022	1021	167	166	-584	22	854	750
chr1	32372156	PTP4A2	ENST00000344035.6	2.94488	3794	2801	2800	2297	2296	-134	993	503	2430
chr1	32372230	PTP4A2	ENST00000344035.6	2.91444	3720	2727	2726	2223	2222	-208	993	503	2430
chr1	32372428	PTP4A2	ENST00000344035.6	2.83299	3522	2529	2528	2025	2024	-406	993	503	2430
chr1	32372547	PTP4A2	ENST00000344035.6	2.78404	3403	2410	2409	1906	1905	-525	993	503	2430
chr1	32372653	PTP4A2	ENST00000344035.6	2.74044	3297	2304	2303	1800	1799	-631	993	503	2430
chr1	32372860	PTP4A2	ENST00000344035.6	2.65529	3090	2097	2096	1593	1592	-838	993	503	2430
chr1	32372897	PTP4A2	ENST00000344035.6	2.64007	3053	2060	2059	1556	1555	-875	993	503	2430
chr1	32372918	PTP4A2	ENST00000344035.6	2.63143	3032	2039	2038	1535	1534	-896	993	503	2430
chr1	32373004	PTP4A2	ENST00000344035.6	2.59605	2946	1953	1952	1449	1448	-982	993	503	2430
chr1	32373065	PTP4A2	ENST00000344035.6	2.57096	2885	1892	1891	1388	1387	-1043	993	503	2430
chr1	32373332	PTP4A2	ENST00000344035.6	2.46113	2618	1625	1624	1121	1120	-1310	993	503	2430
chr1	32373338	PTP4A2	ENST00000344035.6	2.45866	2612	1619	1618	1115	1114	-1316	993	503	2430
chr1	32373382	PTP4A2	ENST00000344035.6	2.44056	2568	1575	1574	1071	1070	-1360	993	503	2430
chr1	32373386	PTP4A2	ENST00000344035.6	2.43891	2564	1571	1570	1067	1066	-1364	993	503	2430
chr1	32373485	PTP4A2	ENST00000344035.6	2.39819	2465	1472	1471	968	967	-1463	993	503	2430
chr1	32373551	PTP4A2	ENST00000344035.6	2.37104	2399	1406	1405	902	901	-1529	993	503	2430
chr1	32373643	PTP4A2	ENST00000344035.6	2.3332	2307	1314	1313	810	809	-1621	993	503	2430
[truncated: 54,008 more rows]

## Sheet: E-YTH_m6A_sites_UTR 5 terminal
chr	coord	gene_name	refseqID	rel_location	utr5_st	utr5_end	cds_st	cds_end	utr3_st	utr3_end	utr5_size	cds_size	utr3_size
[truncated: 586 more rows]

[truncated: 2 more sheets: E-YTH_m6A_sites_CDS, E-YTH_m6A_sites_UTR 3 terminal]
