# Supplementary material for: Single-cell discovery of m6A RNA modifications in the hippocampus
Source: Genome Res. 2024 Jun;34(6):822–36. doi: 10.1101/gr.278424.123 (PMC11293556; doi:10.1101/gr.278424.123)
Supplement: Supplement 14 [file Supplemental_Table_S4.xlsx]

## Sheet: Table S4
Bulk RNA-seq showing C-to-U edits identified in 3 replicates in mouse hippocampus
	E-YTH	YTHmut-E	APOBEC1-E	Wildtype
Replicate 1 specific	12894	5201	6425	2967
Replicate 2 specific	11816	2900	6367	3121
Replicate 3 specific	12216	1957	4798	2789
Replicate 1 and 2	764	313	484	249
Replicate 2 and 3	647	150	424	222
Replicate 1 and 3	744	288	327	218
Replicate 1,2 and 3	2672	2272	2397	2684
Sum of at least 2 replicates of 3	4827	3023	3632	3373
