# Supplementary material for: Single-cell discovery of m6A RNA modifications in the hippocampus
Source: Genome Res. 2024 Jun;34(6):822–36. doi: 10.1101/gr.278424.123 (PMC11293556; doi:10.1101/gr.278424.123)
Supplement: Supplement 15 [file Supplemental_Table_S5.xlsx]

## Sheet: Table S5
Percentage of C-to-U edits per read identified in E-YTH and E-YTHmut plasmid-expressing hippocampal cells.
m/k value	E-YTH	E-YTHmut
5%-25%	1485	79
25%-50%	88	3
50%-75%	5
75%-100%	0	0
Sum	1578	82
