# Supplementary material for: Single-cell discovery of m6A RNA modifications in the hippocampus
Source: Genome Res. 2024 Jun;34(6):822–36. doi: 10.1101/gr.278424.123 (PMC11293556; doi:10.1101/gr.278424.123)
Supplement: Supplement 16 [file Supplemental_Table_S6.xlsx]

## Sheet: Readme
Peak information of m6A-RIP seq of 3 biological replicates
Iterms: 1.chr: from which chromosome 2.start: the start position on the chromosome of the peak 3.end: the end position on the chromosome of the peak 4.length: the length of the peak 5. abs_summit: value of peaks 6.pileup: pileup height at peak summit 7.-log10(pvalue): pvalue of the peak summit 8. fold_enrichment: the enrichment fold of the peak 9.-log10(qvalue): Metrics for fast false discovery r…

## Sheet: Replicate1
Replicate1 of m6A-RIP
chr	start	end	length	abs_summit	pileup	-LOG10(pvalue)	fold_enrichment	-LOG10(qvalue)	name
JH584304.1	46454	46632	179	46588	83.37	41.2246	6.53022	37.9343	WT_rep1_peak_1
JH584304.1	59884	60233	350	60136	156.24	82.4347	7.48746	78.9224	WT_rep1_peak_2
MU069434.1	1626	1890	265	1756	39.39	9.88991	3.12597	6.94304	WT_rep1_peak_3
chr1	3275124	3275328	205	3275239	87.97	39.415	5.93102	36.1391	WT_rep1_peak_4
chr1	3275526	3275800	275	3275652	125.38	80.8986	9.78203	77.3926	WT_rep1_peak_5
chr1	3277198	3277660	463	3277376	246.17	224.637	19.131	220.721	WT_rep1_peak_6
chr1	3283695	3284384	690	3284002	160.83	118.744	12.5258	115.097	WT_rep1_peak_7
chr1	3284866	3287077	2212	3285010	221.23	192.269	17.2002	188.424	WT_rep1_peak_8
chr1	3644857	3645113	257	3644987	65.65	16.4459	3.33228	13.3918	WT_rep1_peak_9
chr1	3690367	3690516	150	3690432	61.05	23.8549	4.80269	20.7118	WT_rep1_peak_10
chr1	3690864	3691298	435	3691255	47.92	14.4893	3.7865	11.4598	WT_rep1_peak_11
chr1	3691562	3691816	255	3691708	113.57	68.8395	8.86746	65.3881	WT_rep1_peak_12
chr1	4980643	4980793	151	4980681	50.55	16.3651	3.98974	13.3114	WT_rep1_peak_13
chr1	6310269	6310570	302	6310454	163.46	121.71	12.6506	118.054	WT_rep1_peak_14
chr1	6318739	6320333	1595	6320098	468.71	490.589	27.3087	486.288	WT_rep1_peak_15
chr1	6332938	6333138	201	6333061	120.79	52.0918	5.79943	48.7306	WT_rep1_peak_16
chr1	6872585	6873235	651	6872971	82.06	33.4098	5.19107	30.1811	WT_rep1_peak_17
chr1	6928640	6928946	307	6928756	50.55	9.03089	2.57736	6.10396	WT_rep1_peak_18
chr1	7190373	7190795	423	7190517	322.98	119.741	5.14249	116.092	WT_rep1_peak_19
chr1	7217758	7217911	154	7217837	78.12	37.0328	6.12374	33.7726	WT_rep1_peak_20
chr1	7239708	7240116	409	7239853	731.29	722.852	24.4098	718.331	WT_rep1_peak_21
chr1	8820353	8820765	413	8820696	40.7	10.4305	3.22759	7.47053	WT_rep1_peak_22
chr1	9368430	9368728	299	9368664	90.59	37.422	5.38771	34.1602	WT_rep1_peak_23
chr1	9616468	9617158	691	9616689	290.81	117.407	5.61174	113.765	WT_rep1_peak_24
chr1	9671472	9671775	304	9671593	96.5	34.3703	4.64282	31.1333	WT_rep1_peak_25
chr1	9696025	9696175	151	9696068	366.3	197.222	8.03726	193.366	WT_rep1_peak_26
chr1	9794691	9795456	766	9794891	1347.05	1809.73	56.1687	1804.54	WT_rep1_peak_27
chr1	9815925	9818210	2286	9816310	873.74	1146.55	51.3046	1141.72	WT_rep1_peak_28
chr1	10183012	10183163	152	10183089	62.36	24.5796	4.90431	21.4301	WT_rep1_peak_29
chr1	11671286	11671548	263	11671412	166.08	77.5086	6.42629	74.0185	WT_rep1_peak_30
chr1	12929271	12929525	255	12929384	64.33	26.0491	5.05674	22.8824	WT_rep1_peak_31
chr1	13212521	13212852	332	13212691	85.34	13.9185	2.53939	10.8996	WT_rep1_peak_32
chr1	13244342	13245465	1124	13244634	301.31	254.481	16.7024	250.508	WT_rep1_peak_33
chr1	14240566	14240992	427	14240844	84.03	42.0786	6.58103	38.7814	WT_rep1_peak_34
chr1	15382859	15383153	295	15383043	99.78	42.2283	5.59897	38.9305	WT_rep1_peak_35
chr1	15469677	15469943	267	15469851	76.81	35.3937	6.02212	32.1463	WT_rep1_peak_36
chr1	15484808	15484977	170	15484916	51.86	12.0865	3.10942	9.10178	WT_rep1_peak_37
chr1	15780280	15780965	686	15780513	181.18	143.086	14.1008	139.365	WT_rep1_peak_38
chr1	15781121	15782100	980	15781464	454.92	528.98	35.2884	524.64	WT_rep1_peak_39
chr1	15913114	15913263	150	15913155	45.3	13.2827	3.58326	10.2711	WT_rep1_peak_40
chr1	16299798	16300022	225	16299879	122.1	70.1389	8.20673	66.681	WT_rep1_peak_41
chr1	16413089	16413314	226	16413181	70.9	26.5411	4.79316	23.3721	WT_rep1_peak_42
chr1	16415071	16415224	154	16415090	210.07	81.4835	5.27666	77.976	WT_rep1_peak_43
chr1	16747399	16747797	399	16747502	189.06	130.114	11.18	126.432	WT_rep1_peak_44
chr1	17066968	17067531	564	17067341	123.41	78.8531	9.6296	75.3559	WT_rep1_peak_45
chr1	17074176	17074896	721	17074753	120.13	52.0918	5.76817	48.7306	WT_rep1_peak_46
chr1	17086270	17086451	182	17086388	81.4	39.5321	6.37779	36.2542	WT_rep1_peak_47
chr1	17161602	17161914	313	17161694	991.91	675.9	11.8203	671.419	WT_rep1_peak_48
chr1	21005090	21008619	3530	21007983	857.33	972.363	34.3333	967.649	WT_rep1_peak_49
chr1	21469539	21470056	518	21469847	108.97	63.9727	8.51179	60.5453	WT_rep1_peak_50
chr1	21472296	21473210	915	21472445	1334.58	1716.99	49.4658	1711.84	WT_rep1_peak_51
chr1	21948306	21948549	244	21948452	51.2	17.0072	4.04055	13.9434	WT_rep1_peak_52
chr1	22358466	22358749	284	22358486	114.88	30.7651	3.66709	27.556	WT_rep1_peak_53
chr1	23408520	23409509	990	23409077	1696.94	1719.65	26.5303	1714.5	WT_rep1_peak_54
chr1	24067534	24067796	263	24067661	150.33	80.0377	7.56643	76.5351	WT_rep1_peak_55
chr1	24068736	24068909	174	24068810	41.36	10.9813	3.2784	8.01331	WT_rep1_peak_56
chr1	24111362	24111511	150	24111479	43.98	12.1128	3.48164	9.12036	WT_rep1_peak_57
chr1	24302154	24302943	790	24302326	89.93	46.4232	7.03831	43.0958	WT_rep1_peak_58
chr1	24802523	24802686	164	24802607	62.36	24.5796	4.90431	21.4301	WT_rep1_peak_59
chr1	25107003	25107525	523	25107326	202.19	67.1957	4.51531	63.7529	WT_rep1_peak_60
chr1	25113782	25114016	235	25113919	124.07	79.8741	9.68041	76.3721	WT_rep1_peak_61
chr1	25132854	25133478	625	25133263	2810.95	4751.24	126.096	4745.23	WT_rep1_peak_62
chr1	25157730	25157982	253	25157866	150.33	107.56	11.7128	103.95	WT_rep1_peak_63
chr1	25315454	25315603	150	25315587	35.45	7.83499	2.82112	4.93303	WT_rep1_peak_64
chr1	25598941	25599090	150	25598953	81.4	15.9929	2.8414	12.9444	WT_rep1_peak_65
chr1	25823871	25824020	150	25823923	40.7	10.4305	3.22759	7.47053	WT_rep1_peak_66
chr1	25847858	25848177	320	25847926	168.05	81.7317	6.76212	78.2233	WT_rep1_peak_67
chr1	25865158	25865924	767	25865556	240.92	191.141	14.7064	187.299	WT_rep1_peak_68
chr1	30842948	30844667	1720	30843071	2623.86	2976.21	35.4711	2970.59	WT_rep1_peak_69
chr1	30844859	30845011	153	30844873	171.99	17.9754	2.10965	14.9031	WT_rep1_peak_70
chr1	30860304	30860453	150	30860374	66.3	18.1432	3.54222	15.0697	WT_rep1_peak_71
chr1	30863525	30863676	152	30863600	61.71	23.8549	4.8535	20.7118	WT_rep1_peak_72
chr1	30869018	30870419	1402	30869524	173.3	129.783	12.8165	126.102	WT_rep1_peak_73
chr1	32514502	32514669	168	32514578	57.77	17.8589	3.91788	14.7871	WT_rep1_peak_74
chr1	33778348	33779191	844	33778742	115.54	70.8129	9.01989	67.3519	WT_rep1_peak_75
chr1	33815625	33816130	506	33815903	145.73	102.074	11.3571	98.4842	WT_rep1_peak_76
chr1	33816278	33816665	388	33816372	66.96	27.5449	5.25998	24.3638	WT_rep1_peak_77
chr1	33839896	33840045	150	33839930	70.24	30.4404	5.48007	27.2368	WT_rep1_peak_78
chr1	33840247	33842408	2162	33841483	1104.82	1297.98	38.1316	1293.05	WT_rep1_peak_79
chr1	34227952	34228101	150	34228017	42.01	11.5422	3.32921	8.56181	WT_rep1_peak_80
chr1	34230881	34231206	326	34230945	99.78	55.4649	7.80046	52.084	WT_rep1_peak_81
chr1	34266832	34267397	566	34267037	653.83	454.471	12.1265	450.21	WT_rep1_peak_82
chr1	34346724	34347061	338	34347029	86.65	22.8779	3.54868	19.7477	WT_rep1_peak_83
chr1	34466115	34466280	166	34466193	69.58	29.8364	5.46321	26.6357	WT_rep1_peak_84
chr1	34467200	34467350	151	34467263	59.74	22.4265	4.70107	19.2986	WT_rep1_peak_85
chr1	34471715	34471943	229	34471808	49.89	15.7313	3.93893	12.6844	WT_rep1_peak_86
chr1	34626060	34627312	1253	34626741	103.06	59.2048	8.0545	55.8037	WT_rep1_peak_87
chr1	34628125	34628722	598	34628521	294.75	270.066	19.7166	266.066	WT_rep1_peak_88
chr1	34628917	34629621	705	34629517	90.59	47.3066	7.08912	43.9746	WT_rep1_peak_89
chr1	34763221	34763539	319	34763349	122.76	58.4352	6.51355	55.0392	WT_rep1_peak_90
chr1	34850728	34851771	1044	34851060	227.79	149.6	10.602	145.861	WT_rep1_peak_91
chr1	34855914	34856408	495	34855992	145.73	52.3629	4.82676	49.0008	WT_rep1_peak_92
chr1	36142716	36143569	854	36143221	555.36	520.148	21.3986	515.818	WT_rep1_peak_93
chr1	36145062	36145440	379	36145292	328.88	306.493	20.6178	302.431	WT_rep1_peak_94
chr1	36182919	36183454	536	36183242	248.8	227.275	19.3342	223.354	WT_rep1_peak_95
chr1	36358323	36358619	297	36358579	32.17	6.41428	2.56707	3.54586	WT_rep1_peak_96
chr1	36374903	36375374	472	36375087	810.07	627.307	14.7467	622.869	WT_rep1_peak_97
chr1	36462990	36463370	381	36463227	105.03	61.0998	8.20693	57.688	WT_rep1_peak_98
chr1	36511725	36512053	329	36511982	40.7	10.4305	3.22759	7.47053	WT_rep1_peak_99
chr1	36551907	36552206	300	36552078	113.57	68.8395	8.86746	65.3881	WT_rep1_peak_100
chr1	36588352	36588573	222	36588451	264.55	248.627	20.5537	244.665	WT_rep1_peak_101
chr1	36831605	36831929	325	36831752	156.89	114.237	12.2209	110.605	WT_rep1_peak_102
chr1	36847097	36847445	349	36847338	72.87	7.85985	2.05185	4.95763	WT_rep1_peak_103
chr1	37442624	37442774	151	37442634	51.2	13.121	3.26273	10.1181	WT_rep1_peak_104
chr1	37449349	37449684	336	37449560	70.9	21.8344	3.9943	18.7152	WT_rep1_peak_105
chr1	37459048	37459197	150	37459126	54.49	18.982	4.29459	15.8951	WT_rep1_peak_106
chr1	37459382	37459607	226	37459476	100.44	47.6346	6.33987	44.3016	WT_rep1_peak_107
chr1	37483528	37483678	151	37483653	43.33	12.1128	3.43083	9.12036	WT_rep1_peak_108
chr1	37651198	37651364	167	37651269	338.08	71.4707	3.16893	68.0077	WT_rep1_peak_109
chr1	37663041	37663531	491	37663179	579.65	300.751	7.74718	296.7	WT_rep1_peak_110
chr1	37914717	37914963	247	37914840	40.04	10.4305	3.17678	7.47053	WT_rep1_peak_111
chr1	37918118	37918267	150	37918213	41.36	10.9813	3.2784	8.01331	WT_rep1_peak_112
chr1	38057828	38058594	767	38058364	424.73	274.897	10.6432	270.889	WT_rep1_peak_113
chr1	38060533	38060833	301	38060686	570.46	209.879	5.1483	205.996	WT_rep1_peak_114
chr1	38061113	38061335	223	38061241	201.53	99.2754	6.98387	95.6968	WT_rep1_peak_115
chr1	38071251	38071404	154	38071380	105.69	20.5487	2.8835	17.4445	WT_rep1_peak_116
chr1	38074968	38075256	289	38075101	320.35	37.9189	2.26303	34.6531	WT_rep1_peak_117
chr1	38127089	38127762	674	38127616	235.01	210.253	18.2672	206.368	WT_rep1_peak_118
chr1	38247096	38247259	164	38247128	230.42	76.4008	4.53758	72.9146	WT_rep1_peak_119
chr1	38248655	38249263	609	38248777	154.27	112	12.0176	108.375	WT_rep1_peak_120
chr1	38836437	38837283	847	38836776	865.21	868.941	25.4768	864.303	WT_rep1_peak_121
chr1	38903015	38903407	393	38903145	61.71	23.8549	4.8535	20.7118	WT_rep1_peak_122
chr1	38903581	38903922	342	38903890	115.54	60.5589	7.28353	57.1519	WT_rep1_peak_123
chr1	38904184	38904989	806	38904714	194.31	140.556	12.207	136.842	WT_rep1_peak_124
chr1	39411465	39411614	150	39411479	34.79	7.34946	2.77031	4.45702	WT_rep1_peak_125
chr1	39591415	39591619	205	39591524	80.09	38.6937	6.27617	35.421	WT_rep1_peak_126
chr1	39657743	39658225	483	39657889	1421.89	1645.83	36.9581	1640.73	WT_rep1_peak_127
chr1	39658900	39659115	216	39659039	53.17	15.4258	3.61153	12.3871	WT_rep1_peak_128
chr1	39661830	39662255	426	39662155	130.63	46.0461	4.70125	42.7233	WT_rep1_peak_129
chr1	40064271	40064420	150	40064308	124.07	71.6945	8.2828	68.2309	WT_rep1_peak_130
chr1	40115093	40115401	309	40115098	43.33	12.1128	3.43083	9.12036	WT_rep1_peak_131
chr1	40352297	40352945	649	40352780	150.33	107.56	11.7128	103.95	WT_rep1_peak_132
chr1	40668491	40668814	324	40668590	96.5	52.7051	7.54641	49.3405	WT_rep1_peak_133
chr1	40668955	40669252	298	40669103	122.76	77.8356	9.57879	74.342	WT_rep1_peak_134
chr1	40807000	40807474	475	40807268	84.68	42.0786	6.63183	38.7814	WT_rep1_peak_135
chr1	42630079	42630234	156	42630107	65.65	26.7938	5.15836	23.6212	WT_rep1_peak_136
chr1	42735140	42736027	888	42735520	978.78	922.3	22.1669	917.622	WT_rep1_peak_137
chr1	42737206	42737406	201	42737354	106.35	23.4898	3.12962	20.3539	WT_rep1_peak_138
chr1	42737914	42739316	1403	42738051	3791.04	5007.06	54.9571	5001.02	WT_rep1_peak_139
chr1	42740792	42740942	151	42740915	89.28	34.725	5.01545	31.4844	WT_rep1_peak_140
chr1	43114525	43115075	551	43114939	70.9	26.5411	4.79316	23.3721	WT_rep1_peak_141
chr1	43593270	43593662	393	43593399	128.67	36.0134	3.81369	32.7636	WT_rep1_peak_142
chr1	43608638	43609150	513	43609060	99.12	55.4649	7.74965	52.084	WT_rep1_peak_143
chr1	44182092	44182418	327	44182235	49.89	15.7313	3.93893	12.6844	WT_rep1_peak_144
chr1	44220022	44220211	190	44220125	219.26	189.731	17.0478	185.892	WT_rep1_peak_145
chr1	46874320	46875321	1002	46875098	780.53	895.928	35.2834	891.271	WT_rep1_peak_146
chr1	50992667	50992875	209	50992811	87.31	23.0969	3.53235	19.9656	WT_rep1_peak_147
chr1	51023623	51023792	170	51023659	66.3	27.5449	5.20917	24.3638	WT_rep1_peak_148
chr1	52198585	52198921	337	52198790	89.28	46.4232	6.9875	43.0958	WT_rep1_peak_149
chr1	52226828	52227003	176	52226938	82.71	40.3758	6.47941	37.0906	WT_rep1_peak_150
chr1	52498202	52498384	183	52498313	74.18	33.7769	5.81888	30.5425	WT_rep1_peak_151
chr1	52520113	52520266	154	52520188	62.36	24.5796	4.90431	21.4301	WT_rep1_peak_152
chr1	52529171	52529408	238	52529286	827.79	925.987	33.1517	921.306	WT_rep1_peak_153
chr1	52695834	52696134	301	52695901	54.49	12.6563	3.08255	9.65983	WT_rep1_peak_154
chr1	52696963	52697474	512	52697106	116.85	59.295	7.03578	55.8934	WT_rep1_peak_155
chr1	52747453	52747603	151	52747470	76.81	21.5405	3.70502	18.4253	WT_rep1_peak_156
chr1	52748008	52748979	972	52748248	200.22	95.7854	6.70731	92.2193	WT_rep1_peak_157
chr1	52827882	52828157	276	52828017	75.49	9.39931	2.1855	6.4605	WT_rep1_peak_158
chr1	52828766	52829260	495	52829070	153.61	110.886	11.9668	107.265	WT_rep1_peak_159
chr1	53386277	53386434	158	53386350	52.52	17.6575	4.14217	14.587	WT_rep1_peak_160
chr1	53851989	53852269	281	53852124	105.69	61.0998	8.25774	57.688	WT_rep1_peak_161
chr1	53965365	53965515	151	53965461	53.83	18.3158	4.24378	15.2352	WT_rep1_peak_162
chr1	55210828	55211172	345	55211122	119.48	74.8043	9.32474	71.3248	WT_rep1_peak_163
chr1	55277620	55278316	697	55277909	181.84	143.086	14.1517	139.365	WT_rep1_peak_164
chr1	55734999	55735925	927	55735403	131.29	60.9278	6.29959	57.5195	WT_rep1_peak_165
chr1	55736146	55737272	1127	55736939	236.32	211.552	18.3688	207.664	WT_rep1_peak_166
chr1	56835254	56836189	936	56836062	112.91	64.0662	8.13647	60.6386	WT_rep1_peak_167
chr1	57422004	57422767	764	57422364	219.26	181.911	15.7326	178.091	WT_rep1_peak_168
chr1	57427529	57427744	216	57427624	53.83	18.3158	4.24378	15.2352	WT_rep1_peak_169
chr1	58424049	58424387	339	58424142	99.12	55.4649	7.74965	52.084	WT_rep1_peak_170
chr1	58425460	58425705	246	58425564	61.71	23.8549	4.8535	20.7118	WT_rep1_peak_171
chr1	58500513	58500935	423	58500664	55.8	19.6559	4.39621	16.5595	WT_rep1_peak_172
chr1	58502809	58503104	296	58502861	95.19	51.794	7.44479	48.4339	WT_rep1_peak_173
chr1	58568866	58569415	550	58569307	390.59	211.993	8.15816	208.105	WT_rep1_peak_174
chr1	58941801	58943298	1498	58942593	2525.39	2257.09	20.0507	2251.73	WT_rep1_peak_175
chr1	59202178	59202610	433	59202510	160.83	56.6325	4.75976	53.2464	WT_rep1_peak_176
chr1	59203140	59203302	163	59203216	101.75	34.5062	4.46743	31.2688	WT_rep1_peak_177
chr1	59254933	59255167	235	59255053	36.76	8.33208	2.92274	5.41642	WT_rep1_peak_178
chr1	59523848	59524134	287	59523994	53.83	18.3158	4.24378	15.2352	WT_rep1_peak_179
chr1	59678711	59679135	425	59678988	563.9	644.696	34.3402	640.242	WT_rep1_peak_180
chr1	59749577	59749727	151	59749662	65.65	17.5702	3.50767	14.5029	WT_rep1_peak_181
chr1	59750305	59750561	257	59750430	79.43	37.6623	6.18702	34.3996	WT_rep1_peak_182
chr1	59803479	59803709	231	59803584	323.63	260.826	15.3855	256.842	WT_rep1_peak_183
chr1	59906551	59907672	1122	59907142	428.01	172.815	5.64487	169.017	WT_rep1_peak_184
chr1	59909586	59909755	170	59909640	103.06	45.3526	5.78132	42.0339	WT_rep1_peak_185
chr1	60020699	60021487	789	60021097	634.79	675.281	28.8997	670.8	WT_rep1_peak_186
chr1	60029509	60030231	723	60030096	162.8	121.013	12.6782	117.359	WT_rep1_peak_187
chr1	60187116	60187271	156	60187130	55.14	19.6559	4.3454	16.5595	WT_rep1_peak_188
chr1	60515764	60516524	761	60516224	808.1	821.061	26.0999	816.458	WT_rep1_peak_189
chr1	60527421	60528030	610	60527609	341.36	333.861	22.8238	329.756	WT_rep1_peak_190
chr1	62742921	62743424	504	62743190	611.16	758.49	42.6593	753.939	WT_rep1_peak_191
chr1	62854679	62855195	517	62854919	319.04	325.078	24.7708	320.987	WT_rep1_peak_192
chr1	63097069	63097623	555	63097468	137.86	93.452	10.7474	89.8945	WT_rep1_peak_193
chr1	63097766	63098351	586	63098115	63.68	25.311	5.00593	22.1528	WT_rep1_peak_194
chr1	63125182	63125646	465	63125360	225.82	126.909	8.40078	123.236	WT_rep1_peak_195
chr1	63344117	63344269	153	63344122	71.55	22.4631	4.03077	19.335	WT_rep1_peak_196
chr1	63346463	63346636	174	63346599	91.9	48.1948	7.19074	44.8565	WT_rep1_peak_197
chr1	63348121	63348270	150	63348148	41.36	10.9813	3.2784	8.01331	WT_rep1_peak_198
chr1	63348894	63349157	264	63348971	54.49	18.982	4.29459	15.8951	WT_rep1_peak_199
chr1	63631849	63632594	746	63632089	326.26	329.169	24.3315	325.072	WT_rep1_peak_200
chr1	63770868	63771264	397	63770937	116.19	71.8053	9.07069	68.339	WT_rep1_peak_201
chr1	64074021	64075016	996	64074669	308.53	309.435	23.9579	305.369	WT_rep1_peak_202
chr1	64118017	64118298	282	64118042	87.97	26.9168	4.04387	23.7435	WT_rep1_peak_203
chr1	64636259	64636982	724	64636635	313.79	316.525	24.3644	312.447	WT_rep1_peak_204
chr1	64646904	64647053	150	64646940	45.3	13.2827	3.58326	10.2711	WT_rep1_peak_205
chr1	64762797	64763034	238	64762888	66.96	27.5449	5.25998	24.3638	WT_rep1_peak_206
chr1	64833660	64834034	375	64833784	270.46	256.744	21.011	252.767	WT_rep1_peak_207
chr1	64961079	64961253	175	64961202	55.14	19.6559	4.3454	16.5595	WT_rep1_peak_208
chr1	64961607	64961756	150	64961663	49.23	15.7313	3.88812	12.6844	WT_rep1_peak_209
chr1	64976919	64977464	546	64977187	260.61	225.917	17.4409	221.999	WT_rep1_peak_210
chr1	65285488	65286222	735	65285634	191.69	155.055	14.9138	151.301	WT_rep1_peak_211
chr1	65312766	65313086	321	65312943	62.36	24.5796	4.90431	21.4301	WT_rep1_peak_212
chr1	66451650	66452089	440	66451775	846.83	226.558	3.85377	222.639	WT_rep1_peak_213
chr1	66452418	66452671	254	66452553	386	38.3701	2.10324	35.1027	WT_rep1_peak_214
chr1	66453853	66454144	292	66453920	1242.67	295.921	3.52315	291.877	WT_rep1_peak_215
chr1	66734429	66734958	530	66734824	1268.93	1288.19	26.4845	1283.27	WT_rep1_peak_216
chr1	66736851	66737000	150	66736942	58.42	21.7229	4.59945	18.6043	WT_rep1_peak_217
chr1	66840422	66841137	716	66840836	128.01	83.9924	9.98527	80.4728	WT_rep1_peak_218
chr1	68077740	68078165	426	68078021	63.02	25.311	4.95512	22.1528	WT_rep1_peak_219
chr1	68079113	68079586	474	68079372	300	234.01	14.3334	230.077	WT_rep1_peak_220
chr1	69005388	69005655	268	69005526	80.09	36.1048	5.79198	32.8545	WT_rep1_peak_221
chr1	70767969	70768222	254	70768073	35.45	7.83499	2.82112	4.93303	WT_rep1_peak_222
chr1	72340312	72340823	512	72340696	40.7	10.4305	3.22759	7.47053	WT_rep1_peak_223
chr1	72467862	72468214	353	72468133	58.42	21.7229	4.59945	18.6043	WT_rep1_peak_224
chr1	72575156	72575305	150	72575161	45.3	13.2827	3.58326	10.2711	WT_rep1_peak_225
chr1	72625244	72625494	251	72625398	575.06	567.245	24.0023	562.865	WT_rep1_peak_226
chr1	72897962	72898512	551	72898253	188.4	69.292	4.98429	65.8393	WT_rep1_peak_227
chr1	72898678	72899681	1004	72899426	2247.05	2929.79	52.2803	2924.18	WT_rep1_peak_228
chr1	72901226	72901449	224	72901340	573.09	382.575	11.2566	378.404	WT_rep1_peak_229
chr1	74605836	74606155	320	74606008	64.33	26.0491	5.05674	22.8824	WT_rep1_peak_230
chr1	74611106	74611313	208	74611233	34.14	7.34946	2.7195	4.45702	WT_rep1_peak_231
chr1	74718721	74719052	332	74718966	99.78	55.4649	7.80046	52.084	WT_rep1_peak_232
chr1	74895113	74896078	966	74895315	1010.94	871.458	18.3489	866.818	WT_rep1_peak_233
chr1	75123247	75123697	451	75123597	168.05	87.1102	7.33418	83.5794	WT_rep1_peak_234
chr1	75191636	75191969	334	75191770	1351.64	1724.39	48.3087	1719.24	WT_rep1_peak_235
chr1	75192292	75192541	250	75192426	2035.67	1557.61	14.6523	1552.55	WT_rep1_peak_236
chr1	75192789	75193188	400	75193055	2577.91	2423.57	22.4253	2418.16	WT_rep1_peak_237
chr1	75398331	75398547	217	75398419	64.99	17.0035	3.47312	13.9434	WT_rep1_peak_238
chr1	75399025	75399290	266	75399154	90.59	18.5714	2.95455	15.4898	WT_rep1_peak_239
chr1	75408198	75408508	311	75408293	244.86	79.4453	4.47015	75.9466	WT_rep1_peak_240
chr1	75451235	75452417	1183	75451434	182.5	144.273	14.2025	140.548	WT_rep1_peak_241
chr1	75454083	75454368	286	75454220	103.72	59.2048	8.10531	55.8037	WT_rep1_peak_242
chr1	75483102	75483362	261	75483228	53.17	18.3158	4.19298	15.2352	WT_rep1_peak_243
chr1	77345156	77346417	1262	77346270	343.33	244.148	12.2974	240.195	WT_rep1_peak_244
chr1	77349575	77350606	1032	77349840	855.36	854.774	25.1872	850.145	WT_rep1_peak_245
chr1	77483303	77483835	533	77483661	1412.04	963.107	11.8743	958.399	WT_rep1_peak_246
chr1	78394438	78394593	156	78394464	57.77	21.0265	4.54864	17.9141	WT_rep1_peak_247
chr1	78642106	78642281	176	78642218	204.81	78.9934	5.2773	75.4958	WT_rep1_peak_248
chr1	78642799	78643385	587	78643129	377.46	243.317	10.5129	239.365	WT_rep1_peak_249
chr1	78643622	78644573	952	78643898	188.4	139.136	12.6269	135.426	WT_rep1_peak_250
chr1	78659510	78659680	171	78659555	116.85	71.8053	9.1215	68.339	WT_rep1_peak_251
chr1	78683942	78684407	466	78684082	280.96	67.5039	3.48103	64.0604	WT_rep1_peak_252
chr1	79412936	79413310	375	79413008	241.58	47.398	2.99477	44.0658	WT_rep1_peak_253
chr1	79413638	79414314	677	79413978	1290.59	726.662	8.78636	722.138	WT_rep1_peak_254
chr1	79755545	79755757	213	79755677	59.74	22.4265	4.70107	19.2986	WT_rep1_peak_255
chr1	80244654	80245085	432	80244949	317.07	190.713	9.35496	186.873	WT_rep1_peak_256
chr1	80583187	80583336	150	80583231	39.39	9.88991	3.12597	6.94304	WT_rep1_peak_257
chr1	81055366	81055549	184	81055425	63.02	25.311	4.95512	22.1528	WT_rep1_peak_258
chr1	82215002	82215404	403	82215135	153.61	110.886	11.9668	107.265	WT_rep1_peak_259
chr1	82264510	82265303	794	82264624	152.3	109.774	11.8652	106.157	WT_rep1_peak_260
chr1	82265959	82266130	172	82266041	91.25	48.1948	7.13993	44.8565	WT_rep1_peak_261
chr1	83253498	83254054	557	83253754	529.1	320.688	9.63826	316.604	WT_rep1_peak_262
chr1	83255251	83255401	151	83255265	168.71	20.6213	2.26279	17.5166	WT_rep1_peak_263
chr1	83256528	83257104	577	83256666	191.03	113.366	8.91086	109.737	WT_rep1_peak_264
chr1	84014613	84014762	150	84014748	54.49	18.982	4.29459	15.8951	WT_rep1_peak_265
chr1	84014909	84015871	963	84015259	135.23	91.3273	10.5442	87.778	WT_rep1_peak_266
chr1	84255472	84255791	320	84255589	43.33	6.79196	2.33296	3.91941	WT_rep1_peak_267
chr1	84702277	84702613	337	84702483	120.79	30.2239	3.47966	27.0214	WT_rep1_peak_268
chr1	84763893	84764048	156	84763918	91.9	48.1948	7.19074	44.8565	WT_rep1_peak_269
chr1	84771265	84772134	870	84771845	700.44	370.353	7.9709	366.198	WT_rep1_peak_270
chr1	84890512	84890706	195	84890617	47.92	14.4893	3.7865	11.4598	WT_rep1_peak_271
chr1	85776961	85777606	646	85777333	712.91	494.255	12.1002	489.95	WT_rep1_peak_272
chr1	86061212	86061363	152	86061357	214.66	78.8144	5.01538	75.3183	WT_rep1_peak_273
chr1	86064562	86064715	154	86064703	296.72	36.5642	2.3079	33.31	WT_rep1_peak_274
chr1	86278058	86278746	689	86278385	519.26	256.363	7.2258	252.387	WT_rep1_peak_275
chr1	86284167	86284523	357	86284439	1843.33	985.369	8.18248	980.645	WT_rep1_peak_276
chr1	86284715	86285050	336	86284842	1303.07	306.296	3.48681	302.235	WT_rep1_peak_277
chr1	87165766	87165915	150	87165782	48.58	15.106	3.83731	12.0697	WT_rep1_peak_278
chr1	87166260	87166679	420	87166397	60.39	23.1372	4.75188	20.0029	WT_rep1_peak_279
chr1	87377133	87377282	150	87377227	71.55	25.5233	4.53461	22.3638	WT_rep1_peak_280
chr1	87378061	87378210	150	87378067	49.23	15.7313	3.88812	12.6844	WT_rep1_peak_281
chr1	88193765	88194105	341	88193919	179.21	140.721	13.9484	137.006	WT_rep1_peak_282
chr1	88628018	88628433	416	88628227	43.33	12.1128	3.43083	9.12036	WT_rep1_peak_283
chr1	88628608	88628982	375	88628780	302.63	156.711	7.59067	152.953	WT_rep1_peak_284
chr1	89071389	89071556	168	89071486	41.36	10.9813	3.2784	8.01331	WT_rep1_peak_285
chr1	89080895	89081306	412	89081037	61.05	23.8549	4.80269	20.7118	WT_rep1_peak_286
chr1	89816642	89817016	375	89816906	168.71	82.5255	6.87083	79.013	WT_rep1_peak_287
chr1	89818026	89818770	745	89818333	338.73	334.838	23.4298	330.733	WT_rep1_peak_288
chr1	90539941	90540776	836	90540635	122.76	77.8356	9.57879	74.342	WT_rep1_peak_289
chr1	91055767	91056452	686	91056306	101.09	57.3264	7.90207	53.935	WT_rep1_peak_290
chr1	91213127	91213610	484	91213444	168.05	127.885	13.0846	124.209	WT_rep1_peak_291
chr1	91344173	91344578	406	91344318	187.09	150.24	14.5581	146.499	WT_rep1_peak_292
chr1	91345224	91345804	581	91345473	138.51	94.519	10.7982	90.9579	WT_rep1_peak_293
chr1	91428656	91429061	406	91428872	248.14	86.9767	4.79117	83.4463	WT_rep1_peak_294
chr1	91482719	91482901	183	91482867	39.39	9.88991	3.12597	6.94304	WT_rep1_peak_295
chr1	91860133	91860362	230	91860244	134.57	90.2698	10.4934	86.725	WT_rep1_peak_296
chr1	91860588	91860968	381	91860796	416.85	468.385	32.1423	464.109	WT_rep1_peak_297
chr1	92847456	92848076	621	92847933	63.02	25.311	4.95512	22.1528	WT_rep1_peak_298
chr1	93224360	93224509	150	93224438	51.2	17.0072	4.04055	13.9434	WT_rep1_peak_299
chr1	93227315	93227495	181	93227380	61.05	23.8549	4.80269	20.7118	WT_rep1_peak_300
chr1	93229226	93229603	378	93229354	137.86	93.452	10.7474	89.8945	WT_rep1_peak_301
chr1	93292682	93292876	195	93292823	64.99	15.9025	3.29946	12.8547	WT_rep1_peak_302
chr1	93293364	93294203	840	93293740	151.64	108.666	11.8144	105.053	WT_rep1_peak_303
chr1	93548971	93549134	164	93549111	52.52	17.6575	4.14217	14.587	WT_rep1_peak_304
chr1	95519068	95519732	665	95519583	87.31	44.6706	6.83507	41.3547	WT_rep1_peak_305
chr1	97573356	97573966	611	97573788	212.04	124.895	8.87648	121.229	WT_rep1_peak_306
chr1	97689239	97689388	150	97689287	62.36	24.5796	4.90431	21.4301	WT_rep1_peak_307
chr1	100707005	100707154	150	100707101	51.2	17.0072	4.04055	13.9434	WT_rep1_peak_308
chr1	104921907	104922292	386	104922162	174.62	134.849	13.5928	131.152	WT_rep1_peak_309
chr1	105958421	105959031	611	105958888	97.16	53.6206	7.59722	50.2501	WT_rep1_peak_310
chr1	106320417	106321248	832	106321028	1020.79	789.215	14.8086	784.636	WT_rep1_peak_311
chr1	106469544	106469900	357	106469774	95.84	51.794	7.4956	48.4339	WT_rep1_peak_312
chr1	106640152	106640316	165	106640223	84.68	42.0786	6.63183	38.7814	WT_rep1_peak_313
chr1	106640584	106640733	150	106640658	51.2	17.0072	4.04055	13.9434	WT_rep1_peak_314
chr1	106652382	106652779	398	106652668	127.35	82.9578	9.93446	79.443	WT_rep1_peak_315
chr1	111786783	111787028	246	111786867	36.76	8.33208	2.92274	5.41642	WT_rep1_peak_316
chr1	111787482	111787839	358	111787737	80.09	38.6937	6.27617	35.421	WT_rep1_peak_317
chr1	111788965	111789299	335	111789015	45.3	13.2827	3.58326	10.2711	WT_rep1_peak_318
chr1	111791116	111791445	330	111791300	93.87	29.2891	4.12493	26.0929	WT_rep1_peak_319
chr1	118347371	118347573	203	118347490	87.31	44.6706	6.83507	41.3547	WT_rep1_peak_320
chr1	118536385	118536969	585	118536537	464.12	379.356	16.0385	375.19	WT_rep1_peak_321
chr1	118763843	118764069	227	118763955	43.33	12.1128	3.43083	9.12036	WT_rep1_peak_322
chr1	119454910	119455535	626	119455512	59.74	22.4265	4.70107	19.2986	WT_rep1_peak_323
chr1	119586846	119587713	868	119587308	300	298.165	23.2974	294.118	WT_rep1_peak_324
chr1	119595285	119595435	151	119595377	116.19	71.8053	9.07069	68.339	WT_rep1_peak_325
chr1	120270448	120270810	363	120270703	174.62	96.6917	8.09297	93.1224	WT_rep1_peak_326
chr1	121247578	121247727	150	121247649	66.3	20.7187	3.95895	17.6134	WT_rep1_peak_327
chr1	123261778	123262153	376	123262004	192.34	156.264	14.9646	152.507	WT_rep1_peak_328
chr1	125796355	125796546	192	125796447	69.58	29.8364	5.46321	26.6357	WT_rep1_peak_329
chr1	125800067	125800625	559	125800149	1899.13	1417.47	13.9715	1412.48	WT_rep1_peak_330
chr1	125800780	125801097	318	125800877	111.6	66.8812	8.71503	63.4394	WT_rep1_peak_331
chr1	127410169	127410804	636	127410450	264.55	177.775	11.0647	173.965	WT_rep1_peak_332
chr1	127730022	127731676	1655	127731130	366.96	374.542	25.3765	370.381	WT_rep1_peak_333
chr1	127751541	127751789	249	127751658	108.32	63.9727	8.46098	60.5453	WT_rep1_peak_334
chr1	128188436	128188590	155	128188516	125.38	66.5463	7.43431	63.1069	WT_rep1_peak_335
chr1	128190408	128190632	225	128190527	224.51	86.0202	5.24438	82.4934	WT_rep1_peak_336
chr1	128193950	128194100	151	128194025	125.38	80.8986	9.78203	77.3926	WT_rep1_peak_337
chr1	128226317	128226552	236	128226437	49.89	15.7313	3.93893	12.6844	WT_rep1_peak_338
chr1	128227612	128228070	459	128227755	605.25	777.732	46.9238	773.164	WT_rep1_peak_339
chr1	128228295	128228802	508	128228658	113.57	68.8395	8.86746	65.3881	WT_rep1_peak_340
chr1	128235598	128235896	299	128235843	44.64	12.6931	3.53245	9.69272	WT_rep1_peak_341
chr1	130618346	130618905	560	130618763	70.9	30.6126	5.56483	27.4041	WT_rep1_peak_342
chr1	130646551	130647223	673	130646985	125.38	80.8986	9.78203	77.3926	WT_rep1_peak_343
chr1	131056289	131057570	1282	131056435	176.59	137.191	13.7452	133.487	WT_rep1_peak_344
chr1	131107354	131107539	186	131107448	55.8	19.6559	4.39621	16.5595	WT_rep1_peak_345
chr1	131214428	131214603	176	131214502	57.11	21.0265	4.49783	17.9141	WT_rep1_peak_346
chr1	131217134	131217385	252	131217221	91.9	48.1948	7.19074	44.8565	WT_rep1_peak_347
chr1	131855752	131855907	156	131855800	288.18	198.823	11.5674	194.963	WT_rep1_peak_348
chr1	131857218	131857399	182	131857346	175.93	58.6529	4.53668	55.2562	WT_rep1_peak_349
chr1	131858697	131858873	177	131858805	120.13	46.0374	5.04715	42.7147	WT_rep1_peak_350
chr1	131945736	131946179	444	131946033	344.64	361.231	26.7524	357.088	WT_rep1_peak_351
chr1	131954915	131955248	334	131955055	91.9	48.1948	7.19074	44.8565	WT_rep1_peak_352
chr1	132286723	132286889	167	132286790	171.99	87.039	7.20799	83.5085	WT_rep1_peak_353
chr1	132288037	132288505	469	132288167	1188.84	868.146	13.369	863.508	WT_rep1_peak_354
chr1	132318979	132319293	315	132319021	282.28	57.52	3.07909	54.1281	WT_rep1_peak_355
chr1	132377021	132377568	548	132377319	107.66	63.011	8.41017	59.5891	WT_rep1_peak_356
chr1	132391364	132391560	197	132391475	39.39	9.88991	3.12597	6.94304	WT_rep1_peak_357
chr1	132431518	132431950	433	132431644	156.24	46.4272	4.03171	43.0999	WT_rep1_peak_358
chr1	132441800	132443242	1443	132442804	95.84	51.794	7.4956	48.4339	WT_rep1_peak_359
chr1	132496906	132497705	800	132497390	116.85	53.4774	6.2026	50.1102	WT_rep1_peak_360
chr1	132526442	132526676	235	132526569	93.87	32.3231	4.51778	29.1011	WT_rep1_peak_361
chr1	132541673	132541911	239	132541816	43.98	12.1128	3.48164	9.12036	WT_rep1_peak_362
chr1	132865387	132866710	1324	132866454	1008.32	724.561	12.94	720.039	WT_rep1_peak_363
chr1	132866885	132867661	777	132867087	321.66	107.093	4.60948	103.486	WT_rep1_peak_364
chr1	132919371	132920075	705	132919667	594.09	446.594	13.8394	442.342	WT_rep1_peak_365
chr1	132994419	132994568	150	132994493	42.01	11.5422	3.32921	8.56181	WT_rep1_peak_366
chr1	133060458	133061266	809	133060928	257.99	239.233	20.0456	235.288	WT_rep1_peak_367
chr1	133064321	133064570	250	133064432	52.52	17.5373	4.11666	14.4705	WT_rep1_peak_368
chr1	133227733	133228126	394	133228069	199.56	39.4792	2.99348	36.2031	WT_rep1_peak_369
chr1	133228640	133229069	430	133228700	66.96	25.4818	4.85419	22.3225	WT_rep1_peak_370
chr1	133547831	133548330	500	133548080	334.79	346.672	25.9903	342.55	WT_rep1_peak_371
chr1	133548828	133549537	710	133549415	240.26	161.417	10.9665	157.647	WT_rep1_peak_372
chr1	133554641	133554954	314	133554818	77.46	8.53275	2.06479	5.61501	WT_rep1_peak_373
chr1	133584555	133584704	150	133584684	81.4	14.3887	2.65809	11.366	WT_rep1_peak_374
chr1	133584960	133585316	357	133585088	76.15	35.3937	5.97131	32.1463	WT_rep1_peak_375
chr1	133585701	133586051	351	133585998	93.22	48.867	7.08398	45.5263	WT_rep1_peak_376
chr1	133587020	133587831	812	133587273	458.21	269.592	9.18414	265.593	WT_rep1_peak_377
chr1	133634161	133634842	682	133634298	114.22	69.5245	8.86335	66.071	WT_rep1_peak_378
chr1	133667825	133667975	151	133667856	57.77	21.0265	4.54864	17.9141	WT_rep1_peak_379
chr1	133680904	133681456	553	133681178	448.36	413.009	20.4255	408.798	WT_rep1_peak_380
chr1	133840063	133840325	263	133840207	179.21	119.47	10.6007	115.821	WT_rep1_peak_381
chr1	133842198	133842592	395	133842410	215.32	139.622	10.3009	135.911	WT_rep1_peak_382
chr1	134004834	134005206	373	134005098	133.92	89.2154	10.4426	85.6743	WT_rep1_peak_383
chr1	134127137	134127439	303	134127380	175.93	34.0744	2.94884	30.8387	WT_rep1_peak_384
chr1	134129201	134129445	245	134129299	433.26	164.711	5.29587	160.933	WT_rep1_peak_385
chr1	134129683	134131032	1350	134129799	1473.09	1483.53	26.021	1478.51	WT_rep1_peak_386
chr1	134162293	134162519	227	134162425	133.26	44.8279	4.47536	41.5114	WT_rep1_peak_387
chr1	134359814	134359963	150	134359819	50.55	16.3651	3.98974	13.3114	WT_rep1_peak_388
chr1	134433861	134434391	531	134434160	191.03	155.055	14.863	151.301	WT_rep1_peak_389
chr1	134558138	134558472	335	134558201	220.57	190.999	17.1494	187.157	WT_rep1_peak_390
chr1	134558892	134559226	335	134559033	177.24	68.7427	5.24245	65.2927	WT_rep1_peak_391
chr1	134675332	134675481	150	134675475	61.71	18.9772	3.91918	15.893	WT_rep1_peak_392
chr1	134675907	134676331	425	134676160	70.9	30.6126	5.56483	27.4041	WT_rep1_peak_393
chr1	134682565	134682714	150	134682698	64.33	26.0491	5.05674	22.8824	WT_rep1_peak_394
chr1	134682903	134683348	446	134683051	179.87	124.083	11.3043	120.42	WT_rep1_peak_395
chr1	135088110	135088259	150	135088135	75.49	19.7694	3.47693	16.6725	WT_rep1_peak_396
chr1	135088846	135089296	451	135089080	87.31	28.6519	4.24561	25.4632	WT_rep1_peak_397
chr1	135222751	135223006	256	135222759	34.14	7.34946	2.7195	4.45702	WT_rep1_peak_398
chr1	135229395	135229660	266	135229516	131.95	56.3248	5.78034	52.941	WT_rep1_peak_399
chr1	135298827	135299074	248	135298960	54.49	8.61121	2.41243	5.69263	WT_rep1_peak_400
chr1	135310837	135310986	150	135310968	46.61	12.5672	3.4006	9.57151	WT_rep1_peak_401
chr1	135312694	135313220	527	135312975	1062.15	1566.87	74.0869	1561.8	WT_rep1_peak_402
chr1	135366280	135366694	415	135366476	108.32	63.9727	8.46098	60.5453	WT_rep1_peak_403
chr1	135368686	135369572	887	135369136	1159.3	1000.65	18.4175	995.912	WT_rep1_peak_404
chr1	135512311	135512617	307	135512492	127.35	21.7738	2.67401	18.6548	WT_rep1_peak_405
chr1	136103433	136103945	513	136103631	65.65	26.7938	5.15836	23.6212	WT_rep1_peak_406
chr1	136104730	136104887	158	136104812	126.7	81.9265	9.88365	78.4154	WT_rep1_peak_407
chr1	136187335	136187501	167	136187414	50.55	16.3651	3.98974	13.3114	WT_rep1_peak_408
chr1	136198207	136198955	749	136198647	913.79	1060.14	36.5915	1055.36	WT_rep1_peak_409
chr1	136204451	136204630	180	136204492	375.49	84.6448	3.3318	81.1236	WT_rep1_peak_410
chr1	136204958	136205213	256	136205073	271.77	146.931	8.02274	143.2	WT_rep1_peak_411
chr1	136208079	136208784	706	136208347	518.6	342.943	11.0789	338.826	WT_rep1_peak_412
chr1	136209082	136209324	243	136209175	319.04	51.6309	2.66698	48.2744	WT_rep1_peak_413
chr1	136553293	136554627	1335	136554163	461.49	397.137	17.788	392.946	WT_rep1_peak_414
chr1	136554810	136555683	874	136555360	384.03	406.654	27.502	402.452	WT_rep1_peak_415
chr1	139351310	139351809	500	139351611	233.04	168.404	12.318	164.618	WT_rep1_peak_416
chr1	139374741	139375164	424	139374872	182.5	144.273	14.2025	140.548	WT_rep1_peak_417
chr1	143516545	143517062	518	143516832	143.76	61.3385	5.79056	57.926	WT_rep1_peak_418
chr1	143521613	143523246	1634	143522285	972.21	1441.92	74.8625	1436.92	WT_rep1_peak_419
chr1	143622207	143622501	295	143622351	57.11	15.3445	3.41834	12.3067	WT_rep1_peak_420
chr1	143633343	143633497	155	143633363	110.94	38.9836	4.66422	35.7097	WT_rep1_peak_421
chr1	143646345	143646706	362	143646465	369.59	380.583	25.8248	376.414	WT_rep1_peak_422
chr1	143877154	143877606	453	143877465	150.99	107.56	11.7636	103.95	WT_rep1_peak_423
chr1	146777242	146777826	585	146777328	188.4	151.44	14.6598	147.696	WT_rep1_peak_424
chr1	150315693	150315861	169	150315807	169.37	54.6918	4.36836	51.3163	WT_rep1_peak_425
chr1	151694030	151695128	1099	151694393	1160.62	1634.81	64.5342	1629.71	WT_rep1_peak_426
chr1	151767032	151767373	342	151767306	66.3	27.5449	5.20917	24.3638	WT_rep1_peak_427
chr1	151768799	151769169	371	151769032	363.68	388.212	28.0521	384.033	WT_rep1_peak_428
chr1	152393737	152395057	1321	152394766	471.34	439.712	21.0395	435.468	WT_rep1_peak_429
chr1	152713537	152713974	438	152713858	445.08	234.202	7.82593	230.268	WT_rep1_peak_430
chr1	152719952	152720214	263	152720084	87.97	19.8781	3.17733	16.7805	WT_rep1_peak_431
chr1	153096887	153097499	613	153097458	94.53	42.7262	5.97061	39.4265	WT_rep1_peak_432
chr1	153568476	153568777	302	153568674	126.04	73.9506	8.46931	70.4747	WT_rep1_peak_433
chr1	153569845	153569994	150	153569962	84.03	12.1797	2.36185	9.1867	WT_rep1_peak_434
chr1	153571393	153571978	586	153571838	84.68	32.9592	5.04017	29.7344	WT_rep1_peak_435
chr1	153619669	153619935	267	153619799	99.12	55.4649	7.74965	52.084	WT_rep1_peak_436
chr1	153783706	153784028	323	153783881	2876.59	1769.13	10.0968	1763.96	WT_rep1_peak_437
chr1	154273453	154274567	1115	154274114	5139.4	4228.23	16.965	4222.32	WT_rep1_peak_438
chr1	154294824	154295240	417	154294934	72.87	32.183	5.71726	28.9616	WT_rep1_peak_439
chr1	154347843	154348211	369	154347955	1487.53	880.921	9.48109	876.274	WT_rep1_peak_440
chr1	154385467	154385616	150	154385575	45.3	13.2827	3.58326	10.2711	WT_rep1_peak_441
chr1	154602034	154602402	369	154602113	151.64	65.4108	5.87083	61.9776	WT_rep1_peak_442
chr1	154973456	154974423	968	154974181	435.23	429.842	23.7082	425.61	WT_rep1_peak_443
chr1	155077917	155078353	437	155078134	194.31	155.234	14.5213	151.48	WT_rep1_peak_444
chr1	155152311	155152736	426	155152433	34.14	7.34946	2.7195	4.45702	WT_rep1_peak_445
chr1	155156287	155156816	530	155156541	254.05	233.214	19.3954	229.282	WT_rep1_peak_446
chr1	155655220	155655624	405	155655354	139.17	95.5892	10.849	92.0235	WT_rep1_peak_447
chr1	155722736	155723635	900	155722925	188.4	151.44	14.6598	147.696	WT_rep1_peak_448
chr1	155723841	155724199	359	155723970	86.65	43.8016	6.78426	40.4925	WT_rep1_peak_449
chr1	155737518	155737671	154	155737584	75.49	34.5825	5.9205	31.3426	WT_rep1_peak_450
chr1	155738107	155738388	282	155738246	143.76	99.9004	11.2047	96.3187	WT_rep1_peak_451
chr1	155803930	155804099	170	155804060	83.37	41.2246	6.53022	37.9343	WT_rep1_peak_452
chr1	155804317	155804909	593	155804787	78.77	27.0258	4.43193	23.8518	WT_rep1_peak_453
chr1	155808582	155809205	624	155808828	118.16	13.7859	2.16659	10.7711	WT_rep1_peak_454
chr1	155828945	155829558	614	155829158	690.59	899.703	49.3995	895.043	WT_rep1_peak_455
chr1	155882529	155883432	904	155882659	254.05	235.231	19.7407	231.295	WT_rep1_peak_456
chr1	155927063	155927613	551	155927388	439.83	392.617	19.1664	388.431	WT_rep1_peak_457
chr1	155940856	155941476	621	155941157	98.47	54.5406	7.69884	51.1655	WT_rep1_peak_458
chr1	156468519	156468875	357	156468743	113.57	48.8008	5.72835	45.4604	WT_rep1_peak_459
chr1	156469019	156470523	1505	156470314	461.49	408.497	18.8387	404.293	WT_rep1_peak_460
chr1	156508414	156509234	821	156508964	286.87	196.662	11.5149	192.808	WT_rep1_peak_461
chr1	156533319	156533569	251	156533385	70.9	15.0699	2.99572	12.0368	WT_rep1_peak_462
chr1	156636494	156636885	392	156636518	44.64	7.19582	2.40206	4.31432	WT_rep1_peak_463
chr1	156967943	156968484	542	156968300	83.37	41.0147	6.49	37.7272	WT_rep1_peak_464
chr1	156984504	156984977	474	156984609	150.33	78.5498	7.38188	75.0545	WT_rep1_peak_465
chr1	157003399	157003758	360	157003581	330.85	340.885	25.6854	336.77	WT_rep1_peak_466
chr1	158073391	158073808	418	158073538	1011.6	778.641	14.6754	774.072	WT_rep1_peak_467
chr1	158074080	158074385	306	158074277	1365.43	1185.88	18.7182	1181.01	WT_rep1_peak_468
chr1	158123325	158123475	151	158123391	86	31.8546	4.8331	28.6388	WT_rep1_peak_469
chr1	158183182	158183465	284	158183369	122.1	65.0468	7.41572	61.6149	WT_rep1_peak_470
chr1	158516046	158516536	491	158516292	1146.17	842.412	13.4962	837.793	WT_rep1_peak_471
chr1	158516737	158517102	366	158516985	296.06	223.448	13.5028	219.536	WT_rep1_peak_472
chr1	158517397	158517640	244	158517536	82.06	32.5369	5.04906	29.314	WT_rep1_peak_473
chr1	159408873	159409022	150	159408951	47.92	14.4893	3.7865	11.4598	WT_rep1_peak_474
chr1	159585105	159585530	426	159585457	47.26	14.4893	3.73569	11.4598	WT_rep1_peak_475
chr1	159677593	159678066	474	159677936	206.13	40.2142	2.95896	36.9334	WT_rep1_peak_476
chr1	159679520	159679971	452	159679656	339.39	187.325	8.30215	183.492	WT_rep1_peak_477
chr1	159751882	159752046	165	159751996	65.65	18.7829	3.70254	15.6999	WT_rep1_peak_478
chr1	159753654	159755061	1408	159753847	219.91	118.128	7.88975	114.484	WT_rep1_peak_479
chr1	160031229	160031383	155	160031237	147.7	14.5074	2.03702	11.4777	WT_rep1_peak_480
chr1	160051593	160052086	494	160051942	572.43	524.884	20.4797	520.548	WT_rep1_peak_481
chr1	160053956	160054331	376	160054202	210.07	119.495	8.44265	115.846	WT_rep1_peak_482
chr1	160795176	160795495	320	160795462	48.58	15.106	3.83731	12.0697	WT_rep1_peak_483
chr1	160847068	160847554	487	160847438	270.46	256.744	21.011	252.767	WT_rep1_peak_484
chr1	160859503	160859786	284	160859525	128.01	75.8769	8.60061	72.392	WT_rep1_peak_485
chr1	160865902	160866051	150	160866029	53.17	16.7398	3.8695	13.6835	WT_rep1_peak_486
chr1	161645869	161646425	557	161646125	852.08	1218.62	66.0282	1213.74	WT_rep1_peak_487
chr1	161661825	161661974	150	161661934	43.33	12.1128	3.43083	9.12036	WT_rep1_peak_488
chr1	161662135	161662525	391	161662390	58.42	21.7229	4.59945	18.6043	WT_rep1_peak_489
chr1	161798180	161798330	151	161798194	71.55	31.3948	5.61564	28.181	WT_rep1_peak_490
chr1	161798784	161799020	237	161798923	98.47	54.5406	7.69884	51.1655	WT_rep1_peak_491
chr1	162476244	162476692	449	162476367	101.09	57.3264	7.90207	53.935	WT_rep1_peak_492
chr1	162532603	162533845	1243	162532881	351.2	168.795	6.90597	165.007	WT_rep1_peak_493
chr1	162537182	162537342	161	162537248	115.54	43.1941	4.94008	39.8891	WT_rep1_peak_494
chr1	162537869	162538283	415	162538089	835.01	135.637	2.71433	131.938	WT_rep1_peak_495
chr1	163075723	163075872	150	163075837	45.95	13.2827	3.63407	10.2711	WT_rep1_peak_496
chr1	163213915	163214070	156	163213933	53.17	18.3158	4.19298	15.2352	WT_rep1_peak_497
chr1	163779772	163780003	232	163779872	100.44	56.3935	7.85126	53.008	WT_rep1_peak_498
chr1	164107635	164108125	491	164107894	138.51	75.2774	7.75069	71.7966	WT_rep1_peak_499
chr1	164265761	164266007	247	164265904	1308.32	317.874	3.57737	313.795	WT_rep1_peak_500
chr1	165138012	165138544	533	165138414	252.08	189.915	13.32	186.076	WT_rep1_peak_501
chr1	165144679	165144828	150	165144818	72.87	12.6914	2.6381	9.69272	WT_rep1_peak_502
chr1	165148962	165149716	755	165149215	533.7	458.007	17.8233	453.742	WT_rep1_peak_503
chr1	165149860	165150015	156	165149950	69.58	20.2834	3.77457	17.1837	WT_rep1_peak_504
chr1	165421055	165421209	155	165421169	54.49	16.0226	3.69906	12.9739	WT_rep1_peak_505
chr1	165702940	165703331	392	165703078	244.86	222.005	19.0294	218.096	WT_rep1_peak_506
chr1	166138449	166140229	1781	166139643	970.9	1440.89	75.2248	1435.89	WT_rep1_peak_507
chr1	166226048	166227370	1323	166226773	135.89	75.6979	8.05215	72.2158	WT_rep1_peak_508
chr1	166832664	166832900	237	166832826	40.7	10.4305	3.22759	7.47053	WT_rep1_peak_509
chr1	166906230	166907022	793	166906877	219.26	189.731	17.0478	185.892	WT_rep1_peak_510
chr1	166915418	166915603	186	166915540	119.48	74.8043	9.32474	71.3248	WT_rep1_peak_511
chr1	166915768	166916147	380	166915826	57.77	21.0265	4.54864	17.9141	WT_rep1_peak_512
chr1	167053709	167053988	280	167053848	111.6	59.9519	7.50651	56.5483	WT_rep1_peak_513
chr1	169761494	169761866	373	169761664	99.12	55.4649	7.74965	52.084	WT_rep1_peak_514
chr1	169994240	169994509	270	169994374	76.81	35.3937	6.02212	32.1463	WT_rep1_peak_515
chr1	170143191	170144067	877	170143971	533.04	194.334	5.08612	190.485	WT_rep1_peak_516
chr1	170146153	170146534	382	170146275	333.48	173.312	7.64526	169.514	WT_rep1_peak_517
chr1	170509555	170509886	332	170509704	274.4	262.187	21.3158	258.2	WT_rep1_peak_518
chr1	170537434	170537589	156	170537504	120.79	36.435	4.0596	33.1814	WT_rep1_peak_519
chr1	171001194	171001344	151	171001244	58.42	21.7229	4.59945	18.6043	WT_rep1_peak_520
chr1	171045506	171045782	277	171045637	121.44	76.8216	9.47717	73.3332	WT_rep1_peak_521
chr1	171168585	171168864	280	171168719	55.14	19.6559	4.3454	16.5595	WT_rep1_peak_522
chr1	171169849	171170110	262	171169967	86.65	43.583	6.74249	40.2764	WT_rep1_peak_523
chr1	171245690	171246216	527	171246054	204.16	82.9436	5.54481	79.4298	WT_rep1_peak_524
chr1	171291189	171291339	151	171291298	55.14	19.6559	4.3454	16.5595	WT_rep1_peak_525
chr1	171894000	171894256	257	171894146	105.69	51.8426	6.6681	48.4822	WT_rep1_peak_526
chr1	172022215	172022381	167	172022316	233.04	54.9323	3.39192	51.5561	WT_rep1_peak_527
chr1	172100324	172100478	155	172100436	313.79	101.776	4.49695	98.1883	WT_rep1_peak_528
chr1	172101641	172101792	152	172101684	1717.95	165.971	2.10655	162.19	WT_rep1_peak_529
chr1	172148896	172149321	426	172149008	157.55	72.1838	6.30416	68.7164	WT_rep1_peak_530
chr1	172150266	172150475	210	172150391	95.19	20.1225	3.00582	17.0236	WT_rep1_peak_531
chr1	172196817	172197270	454	172197135	149.67	35.1988	3.34827	31.9564	WT_rep1_peak_532
chr1	172197672	172198401	730	172197819	500.88	480.5	22.5057	476.21	WT_rep1_peak_533
chr1	172199038	172199627	590	172199487	1002.41	1152.66	35.8361	1147.82	WT_rep1_peak_534
chr1	172200243	172200697	455	172200417	125.38	30.7714	3.41576	27.5623	WT_rep1_peak_535
chr1	174330213	174330499	287	174330353	70.9	20.4983	3.78407	17.3943	WT_rep1_peak_536
chr1	174436035	174436689	655	174436350	309.85	141.326	6.47599	137.61	WT_rep1_peak_537
chr1	174663609	174663926	318	174663784	364.99	390.722	28.3275	386.539	WT_rep1_peak_538
chr1	174886884	174887066	183	174886980	42.01	11.5422	3.32921	8.56181	WT_rep1_peak_539
chr1	176562612	176562949	338	176562669	40.04	10.4305	3.17678	7.47053	WT_rep1_peak_540
chr1	176563175	176563556	382	176563307	103.72	59.2048	8.10531	55.8037	WT_rep1_peak_541
chr1	176577595	176577776	182	176577694	89.28	46.4232	6.9875	43.0958	WT_rep1_peak_542
chr1	176582738	176583157	420	176583021	227.79	77.5893	4.66919	74.0987	WT_rep1_peak_543
chr1	176583548	176584366	819	176584225	205.47	37.2218	2.82837	33.9607	WT_rep1_peak_544
chr1	176602133	176602396	264	176602333	98.47	22.6097	3.20866	19.4809	WT_rep1_peak_545
chr1	177274573	177276386	1814	177275545	5567.41	4985.75	20.2488	4979.72	WT_rep1_peak_546
chr1	177276794	177276944	151	177276934	151.64	32.2523	3.11513	29.0305	WT_rep1_peak_547
chr1	177277375	177277725	351	177277597	260.61	125.702	6.88456	122.033	WT_rep1_peak_548
chr1	177811793	177812249	457	177811869	83.37	41.2246	6.53022	37.9343	WT_rep1_peak_549
chr1	177815378	177815577	200	177815506	105.03	61.0998	8.20693	57.688	WT_rep1_peak_550
chr1	177926253	177926412	160	177926310	72.87	32.183	5.71726	28.9616	WT_rep1_peak_551
chr1	177931454	177931604	151	177931525	85.34	42.9376	6.68264	39.6335	WT_rep1_peak_552
chr1	178076927	178077140	214	178077057	77.46	36.2105	6.07293	32.9577	WT_rep1_peak_553
chr1	178156832	178157070	239	178156970	171.99	72.3118	5.76639	68.8441	WT_rep1_peak_554
chr1	178742563	178742724	162	178742689	63.68	23.3604	4.61974	20.2249	WT_rep1_peak_555
chr1	178759775	178760155	381	178759953	94.53	50.8873	7.39398	47.5337	WT_rep1_peak_556
chr1	179437583	179438200	618	179437873	510.07	556.81	30.2406	552.44	WT_rep1_peak_557
chr1	179452652	179453247	596	179452798	186.43	149.042	14.5073	145.304	WT_rep1_peak_558
chr1	179579953	179580681	729	179580551	101.75	51.0946	6.85005	47.74	WT_rep1_peak_559
chr1	179581036	179581564	529	179581278	264.55	248.627	20.5537	244.665	WT_rep1_peak_560
chr1	179788470	179788648	179	179788602	235.01	38.9585	2.68195	35.6847	WT_rep1_peak_561
chr1	179971966	179972439	474	179972109	221.88	82.0012	5.06551	78.4898	WT_rep1_peak_562
chr1	179989518	179989975	458	179989831	207.44	47.3385	3.30858	44.0064	WT_rep1_peak_563
chr1	180160454	180161479	1026	180161167	162.8	98.0743	9.10007	94.4996	WT_rep1_peak_564
chr1	180264437	180265257	821	180264860	5818.18	7377.73	48.9006	7371.32	WT_rep1_peak_565
chr1	180574301	180574624	324	180574485	154.92	90.2936	8.66243	86.7487	WT_rep1_peak_566
chr1	180579642	180580032	391	180579735	61.71	23.8549	4.8535	20.7118	WT_rep1_peak_567
chr1	180690055	180690271	217	180690166	206.13	143.707	11.5071	139.984	WT_rep1_peak_568
chr1	180693615	180693812	198	180693698	48.58	15.106	3.83731	12.0697	WT_rep1_peak_569
chr1	181004977	181005516	540	181005112	1463.24	2010.17	60.3811	2004.91	WT_rep1_peak_570
chr1	181008891	181009040	150	181009015	140.48	96.6624	10.9506	93.0931	WT_rep1_peak_571
chr1	181286775	181287927	1153	181287530	363.68	378.954	26.522	374.787	WT_rep1_peak_572
chr1	181730687	181731046	360	181730819	94.53	50.8873	7.39398	47.5337	WT_rep1_peak_573
chr1	181732980	181733578	599	181733324	836.98	873.229	27.9327	868.588	WT_rep1_peak_574
chr1	181749494	181750043	550	181749735	116.85	63.7353	7.72782	60.3111	WT_rep1_peak_575
chr1	182103911	182104536	626	182104456	81.4	39.5321	6.37779	36.2542	WT_rep1_peak_576
chr1	182106550	182106807	258	182106692	137.2	88.719	9.87139	85.1814	WT_rep1_peak_577
chr1	182144146	182144822	677	182144656	329.54	255.976	14.3714	252.001	WT_rep1_peak_578
chr1	182275905	182276589	685	182276246	93.22	49.9852	7.29236	46.636	WT_rep1_peak_579
chr1	182289195	182289476	282	182289287	61.05	23.8549	4.80269	20.7118	WT_rep1_peak_580
chr1	182295567	182295721	155	182295578	70.9	19.2574	3.59487	16.1688	WT_rep1_peak_581
chr1	182317688	182318116	429	182317761	63.68	25.311	5.00593	22.1528	WT_rep1_peak_582
chr1	182318259	182318440	182	182318366	95.19	51.794	7.44479	48.4339	WT_rep1_peak_583
chr1	182320052	182320874	823	182320765	843.55	1201.95	65.3677	1197.07	WT_rep1_peak_584
chr1	182321159	182321372	214	182321258	59.74	22.4265	4.70107	19.2986	WT_rep1_peak_585
chr1	182722692	182723500	809	182723229	465.43	442.801	21.9495	438.554	WT_rep1_peak_586
chr1	182867977	182868232	256	182868123	100.44	56.3935	7.85126	53.008	WT_rep1_peak_587
chr1	183103841	183104255	415	183103944	108.32	63.9727	8.46098	60.5453	WT_rep1_peak_588
chr1	183138713	183139280	568	183138782	254.05	94.7134	5.10098	91.152	WT_rep1_peak_589
chr1	183139905	183140489	585	183140349	64.99	20.8734	4.12433	17.7673	WT_rep1_peak_590
chr1	184629616	184629814	199	184629753	42.01	11.5422	3.32921	8.56181	WT_rep1_peak_591
chr1	184630597	184631110	514	184630812	182.5	132.388	12.233	128.699	WT_rep1_peak_592
chr1	185088783	185089120	338	185088874	74.18	33.5931	5.78305	30.3636	WT_rep1_peak_593
chr1	185139648	185139938	291	185139791	168.05	39.0683	3.31476	35.7941	WT_rep1_peak_594
chr1	185160364	185160513	150	185160377	55.8	14.2279	3.34111	11.2072	WT_rep1_peak_595
chr1	185196558	185197141	584	185196697	199.56	164.792	15.5235	161.014	WT_rep1_peak_596
chr1	186356643	186357854	1212	186356948	678.12	904.148	52.5637	899.484	WT_rep1_peak_597
chr1	186958089	186958356	268	186958231	289.5	199.905	11.6199	196.043	WT_rep1_peak_598
chr1	187082088	187082237	150	187082222	64.33	25.8942	5.0256	22.7329	WT_rep1_peak_599
chr1	187943238	187943396	159	187943331	56.46	20.3375	4.44702	17.2345	WT_rep1_peak_600
chr1	187943828	187944054	227	187943955	158.86	116.485	12.3733	112.845	WT_rep1_peak_601
chr1	187944654	187944811	158	187944706	55.8	19.6559	4.39621	16.5595	WT_rep1_peak_602
chr1	188704373	188704778	406	188704639	369.59	239.306	10.5882	235.361	WT_rep1_peak_603
chr1	188941925	188942139	215	188942026	86	42.9376	6.73345	39.6335	WT_rep1_peak_604
chr1	189075379	189075593	215	189075468	141.14	72.0374	7.10691	68.5703	WT_rep1_peak_605
chr1	189854797	189855003	207	189854911	56.46	8.13027	2.29821	5.22567	WT_rep1_peak_606
chr1	189892734	189893619	886	189893298	193.65	76.1971	5.36979	72.7115	WT_rep1_peak_607
chr1	189893760	189894554	795	189894115	241.58	142.194	8.9843	138.476	WT_rep1_peak_608
chr1	190505173	190505837	665	190505673	241.58	188.897	14.2692	185.061	WT_rep1_peak_609
chr1	190531809	190532351	543	190532214	49.23	12.0431	3.13964	9.05866	WT_rep1_peak_610
chr1	190757280	190757635	356	190757412	53.83	18.3158	4.24378	15.2352	WT_rep1_peak_611
chr1	191084918	191085156	239	191085056	46.61	13.8815	3.68488	10.8628	WT_rep1_peak_612
chr1	191510643	191510942	300	191510815	405.03	435.207	28.5939	430.968	WT_rep1_peak_613
chr1	191640878	191641969	1092	191641719	238.95	214.154	18.5721	210.261	WT_rep1_peak_614
chr1	192188238	192189323	1086	192188410	380.74	297.769	14.6825	293.723	WT_rep1_peak_615
chr1	192528571	192529035	465	192528673	67.62	28.3025	5.31079	25.1155	WT_rep1_peak_616
chr1	192579319	192579862	544	192579764	281.62	271.772	21.8747	267.769	WT_rep1_peak_617
chr1	192612876	192613177	302	192613024	125.38	80.5668	9.72179	77.0627	WT_rep1_peak_618
chr1	192666050	192666679	630	192666346	132.6	88.1643	10.3409	84.6282	WT_rep1_peak_619
chr1	192856729	192856881	153	192856852	101.09	57.3264	7.90207	53.935	WT_rep1_peak_620
chr1	194325866	194326590	725	194326151	91.25	48.1948	7.13993	44.8565	WT_rep1_peak_621
chr1	194494311	194495595	1285	194494689	378.78	343.852	19.6775	339.734	WT_rep1_peak_622
chr1	194496230	194496910	681	194496547	136.54	92.3881	10.6458	88.8353	WT_rep1_peak_623
chr1	194712360	194712510	151	194712494	49.89	15.7313	3.93893	12.6844	WT_rep1_peak_624
chr1	194718387	194718642	256	194718530	208.1	81.9442	5.36146	78.4331	WT_rep1_peak_625
chr1	194779208	194779630	423	194779266	104.38	60.1502	8.15612	56.7447	WT_rep1_peak_626
chr1	194780697	194780991	295	194780854	97.81	53.6206	7.64803	50.2501	WT_rep1_peak_627
chr10	3907866	3908102	237	3907963	130.63	86.0717	10.1885	82.5439	WT_rep1_peak_628
chr10	3913449	3914256	808	3913559	95.19	51.794	7.44479	48.4339	WT_rep1_peak_629
chr10	4306585	4306792	208	4306672	86.65	43.583	6.74249	40.2764	WT_rep1_peak_630
chr10	4318367	4318821	455	4318633	134.57	90.2698	10.4934	86.725	WT_rep1_peak_631
chr10	4377316	4377465	150	4377349	44.64	12.6931	3.53245	9.69272	WT_rep1_peak_632
chr10	4403658	4403997	340	4403795	68.93	12.4427	2.68954	9.44807	WT_rep1_peak_633
chr10	4970564	4970925	362	4970831	68.27	29.0663	5.3616	25.8712	WT_rep1_peak_634
chr10	4971103	4972161	1059	4971529	984.69	1229.38	44.8039	1224.49	WT_rep1_peak_635
chr10	5178813	5179020	208	5178955	162.8	40.1074	3.48513	36.8274	WT_rep1_peak_636
chr10	5179445	5179726	282	5179585	70.24	13.0698	2.70364	10.0675	WT_rep1_peak_637
chr10	5287104	5287254	151	5287251	130.63	23.8991	2.80074	20.7558	WT_rep1_peak_638
chr10	5288855	5289193	339	5289076	264.55	126.217	6.79161	122.547	WT_rep1_peak_639
chr10	5763070	5763219	150	5763101	47.26	14.4893	3.73569	11.4598	WT_rep1_peak_640
chr10	5782070	5782393	324	5782280	187.75	138.005	12.5831	134.299	WT_rep1_peak_641
chr10	5782828	5783194	367	5783092	70.9	23.2772	4.22926	20.1422	WT_rep1_peak_642
chr10	6839824	6840270	447	6839931	129.32	80.5985	9.30871	77.0944	WT_rep1_peak_643
chr10	7499341	7499768	428	7499629	248.8	196.89	14.6509	193.035	WT_rep1_peak_644
chr10	7577810	7578837	1028	7578707	246.83	188.752	13.7682	184.916	WT_rep1_peak_645
chr10	7581158	7581647	490	7581320	174.62	134.849	13.5928	131.152	WT_rep1_peak_646
chr10	7588319	7588774	456	7588657	181.18	143.086	14.1008	139.365	WT_rep1_peak_647
chr10	7690378	7690528	151	7690408	55.8	19.6559	4.39621	16.5595	WT_rep1_peak_648
chr10	7696679	7697103	425	7696824	145.08	102.074	11.3063	98.4842	WT_rep1_peak_649
chr10	7781748	7782161	414	7782065	57.77	17.8589	3.91788	14.7871	WT_rep1_peak_650
chr10	7782697	7782985	289	7782839	162.14	94.4594	8.58657	90.8994	WT_rep1_peak_651
chr10	7787227	7787434	208	7787309	122.1	77.8356	9.52798	74.342	WT_rep1_peak_652
chr10	7794934	7796367	1434	7795946	550.77	588.996	29.0404	584.593	WT_rep1_peak_653
chr10	8083232	8083381	150	8083287	106.35	31.859	3.97578	28.6432	WT_rep1_peak_654
chr10	8600664	8601475	812	8601151	210.72	178.407	16.3873	174.595	WT_rep1_peak_655
chr10	8605378	8605659	282	8605576	124.07	47.0799	5.00281	43.75	WT_rep1_peak_656
chr10	8605809	8605997	189	8605859	100.44	30.88	4.05752	27.6703	WT_rep1_peak_657
chr10	8942362	8942511	150	8942389	47.26	14.4893	3.73569	11.4598	WT_rep1_peak_658
chr10	9504485	9504848	364	9504545	84.03	42.0786	6.58103	38.7814	WT_rep1_peak_659
chr10	9550690	9550864	175	9550760	47.26	14.3836	3.71268	11.361	WT_rep1_peak_660
chr10	9635929	9636785	857	9636413	1076.59	1509.98	63.3876	1504.95	WT_rep1_peak_661
chr10	10563531	10564734	1204	10563826	242.89	219.381	18.8769	215.477	WT_rep1_peak_662
chr10	10812240	10812411	172	10812337	119.48	74.8043	9.32474	71.3248	WT_rep1_peak_663
chr10	10955554	10956262	709	10955830	316.41	319.909	24.4163	315.826	WT_rep1_peak_664
chr10	11027320	11027954	635	11027727	207.44	174.668	16.1332	170.866	WT_rep1_peak_665
chr10	11040070	11040374	305	11040338	89.93	36.6661	5.34909	33.4114	WT_rep1_peak_666
chr10	13089557	13089872	316	13089683	502.19	587.509	35.9421	583.108	WT_rep1_peak_667
chr10	13390840	13391216	377	13390927	131.95	87.1164	10.2901	83.5837	WT_rep1_peak_668
chr10	14003176	14003633	458	14003406	1443.55	1460.81	26.3363	1455.8	WT_rep1_peak_669
chr10	14004417	14004763	347	14004617	470.02	207.831	6.28031	203.952	WT_rep1_peak_670
chr10	14007332	14007726	395	14007622	244.2	96.7166	5.43685	93.1472	WT_rep1_peak_671
chr10	14019088	14019367	280	14019267	219.26	65.1916	4.09399	61.759	WT_rep1_peak_672
chr10	14024642	14025566	925	14025306	3953.18	6737.95	131.806	6731.61	WT_rep1_peak_673
chr10	14026653	14026841	189	14026791	369.59	83.5335	3.33861	80.0173	WT_rep1_peak_674
chr10	17600204	17600516	313	17600397	158.86	100.704	9.80752	97.1207	WT_rep1_peak_675
chr10	17790783	17791795	1013	17791501	261.93	147.389	8.48149	143.656	WT_rep1_peak_676
chr10	18401795	18402205	411	18401938	138.51	94.519	10.7982	90.9579	WT_rep1_peak_677
chr10	18407299	18408037	739	18407575	846.83	864.196	26.4947	859.562	WT_rep1_peak_678
chr10	18464925	18465625	701	18465261	218.6	174.066	14.64	170.265	WT_rep1_peak_679
chr10	18467004	18467313	310	18467228	133.92	37.7217	3.85478	34.4586	WT_rep1_peak_680
chr10	18521989	18522422	434	18522298	216.63	112.405	7.50451	108.779	WT_rep1_peak_681
chr10	18877903	18878351	449	18878262	74.18	33.7769	5.81888	30.5425	WT_rep1_peak_682
chr10	19484879	19485528	650	19485209	81.4	39.5321	6.37779	36.2542	WT_rep1_peak_683
chr10	20017250	20017663	414	20017581	64.99	26.0491	5.10755	22.8824	WT_rep1_peak_684
chr10	20200960	20201424	465	20201193	471.34	329.659	12.1112	325.561	WT_rep1_peak_685
chr10	20215332	20215626	295	20215513	248.14	51.7472	3.11426	48.3903	WT_rep1_peak_686
chr10	20273945	20274094	150	20274030	57.11	21.0265	4.49783	17.9141	WT_rep1_peak_687
chr10	20275675	20275914	240	20275797	314.44	317.947	24.4152	313.867	WT_rep1_peak_688
chr10	20835673	20835825	153	20835785	335.45	37.2431	2.19902	33.982	WT_rep1_peak_689
chr10	20838942	20839091	150	20838975	331.51	196.095	9.17271	192.242	WT_rep1_peak_690
chr10	22581468	22581801	334	22581605	103.72	59.2048	8.10531	55.8037	WT_rep1_peak_691
chr10	25046614	25047148	535	25046808	256.02	188.922	12.8509	185.086	WT_rep1_peak_692
chr10	25868811	25869737	927	25868960	189.06	152.643	14.7106	148.895	WT_rep1_peak_693
chr10	26151334	26151529	196	26151382	49.89	15.7313	3.93893	12.6844	WT_rep1_peak_694
chr10	29020003	29020155	153	29020072	51.2	17.0072	4.04055	13.9434	WT_rep1_peak_695
chr10	29026143	29026292	150	29026249	141.14	17.0344	2.22091	13.9703	WT_rep1_peak_696
chr10	29056813	29057015	203	29056926	133.92	88.8603	10.3782	85.3222	WT_rep1_peak_697
chr10	29072176	29072539	364	29072418	320.35	224.871	11.9907	220.955	WT_rep1_peak_698
chr10	29073050	29073216	167	29073122	133.26	26.7929	2.96709	23.6212	WT_rep1_peak_699
chr10	29079397	29079572	176	29079445	78.77	37.0328	6.17455	33.7726	WT_rep1_peak_700
chr10	29092144	29092472	329	29092264	42.67	11.5422	3.38002	8.56181	WT_rep1_peak_701
chr10	29100293	29101271	979	29100487	989.94	869.256	19.0565	864.617	WT_rep1_peak_702
chr10	29103152	29103590	439	29103443	305.91	284.723	20.4606	280.699	WT_rep1_peak_703
chr10	29220500	29220762	263	29220640	57.77	15.3445	3.45695	12.3067	WT_rep1_peak_704
chr10	29222753	29223720	968	29223108	734.58	614.474	17.1064	610.047	WT_rep1_peak_705
chr10	29330076	29330344	269	29330300	76.81	32.9551	5.55753	29.7305	WT_rep1_peak_706
chr10	29411364	29411522	159	29411437	76.15	35.3937	5.97131	32.1463	WT_rep1_peak_707
chr10	30523259	30523640	382	30523405	145.08	102.074	11.3063	98.4842	WT_rep1_peak_708
chr10	30554822	30555064	243	30555018	59.08	22.4265	4.65026	19.2986	WT_rep1_peak_709
chr10	30565775	30566012	238	30565866	86	42.9376	6.73345	39.6335	WT_rep1_peak_710
chr10	30566826	30567619	794	30567173	670.9	628.992	21.6742	624.552	WT_rep1_peak_711
chr10	30709238	30709490	253	30709373	134.57	90.2698	10.4934	86.725	WT_rep1_peak_712
chr10	31378293	31378521	229	31378408	58.42	21.7229	4.59945	18.6043	WT_rep1_peak_713
chr10	31566918	31567153	236	31567043	103.06	59.2048	8.0545	55.8037	WT_rep1_peak_714
chr10	32148721	32148877	157	32148765	46.61	13.8815	3.68488	10.8628	WT_rep1_peak_715
chr10	32150195	32150789	595	32150775	65.65	26.7938	5.15836	23.6212	WT_rep1_peak_716
chr10	32470260	32470409	150	32470327	45.3	13.2827	3.58326	10.2711	WT_rep1_peak_717
chr10	32488812	32488965	154	32488935	58.42	21.7229	4.59945	18.6043	WT_rep1_peak_718
chr10	32556493	32556716	224	32556594	126.04	81.9265	9.83284	78.4154	WT_rep1_peak_719
chr10	32598782	32599348	567	32598966	91.25	48.1948	7.13993	44.8565	WT_rep1_peak_720
chr10	32603820	32604134	315	32604103	70.24	30.6126	5.51402	27.4041	WT_rep1_peak_721
chr10	32606274	32606890	617	32606409	135.23	90.9665	10.4792	87.4198	WT_rep1_peak_722
chr10	32653200	32653349	150	32653228	43.33	12.1128	3.43083	9.12036	WT_rep1_peak_723
chr10	32653552	32654330	779	32654082	59.08	22.4265	4.65026	19.2986	WT_rep1_peak_724
chr10	32751978	32752127	150	32752003	46.61	8.77722	2.64491	5.85711	WT_rep1_peak_725
chr10	32753713	32754127	415	32753996	38.07	9.35981	3.02436	6.42127	WT_rep1_peak_726
chr10	32767038	32767219	182	32767116	44.64	12.6931	3.53245	9.69272	WT_rep1_peak_727
chr10	33389059	33389432	374	33389203	59.08	22.4265	4.65026	19.2986	WT_rep1_peak_728
chr10	33498590	33499201	612	33498978	511.38	368.819	12.8095	364.666	WT_rep1_peak_729
chr10	33825065	33825462	398	33825143	114.88	69.8243	8.96908	66.3675	WT_rep1_peak_730
chr10	34028559	34028880	322	34028689	45.3	13.2827	3.58326	10.2711	WT_rep1_peak_731
chr10	34158550	34160202	1653	34158858	1230.86	734.314	9.57526	729.784	WT_rep1_peak_732
chr10	34174788	34175397	610	34175092	2798.48	3495.65	46.3489	3489.88	WT_rep1_peak_733
chr10	34177015	34177204	190	34177132	104.38	23.621	3.18214	20.4844	WT_rep1_peak_734
chr10	37011020	37011269	250	37011167	63.02	25.1591	4.9246	22.0065	WT_rep1_peak_735
chr10	37011922	37012461	540	37012075	2393.44	2740.11	36.2794	2734.58	WT_rep1_peak_736
chr10	39439950	39440154	205	39440014	141.14	53.8122	5.07636	50.441	WT_rep1_peak_737
chr10	39498006	39498317	312	39498204	66.96	27.5449	5.25998	24.3638	WT_rep1_peak_738
chr10	39697664	39699117	1454	39698210	122.76	77.8356	9.57879	74.342	WT_rep1_peak_739
chr10	39700560	39700983	424	39700839	198.25	163.567	15.4219	159.792	WT_rep1_peak_740
chr10	39703740	39703889	150	39703849	35.45	7.83499	2.82112	4.93303	WT_rep1_peak_741
chr10	39704043	39704526	484	39704404	87.31	44.6706	6.83507	41.3547	WT_rep1_peak_742
chr10	39706750	39706901	152	39706842	85.34	42.9376	6.68264	39.6335	WT_rep1_peak_743
chr10	39767232	39768132	901	39768008	131.95	87.1164	10.2901	83.5837	WT_rep1_peak_744
chr10	40125390	40125863	474	40125721	123.41	52.2631	5.65518	48.9013	WT_rep1_peak_745
chr10	40177920	40178091	172	40177967	93.22	49.9852	7.29236	46.636	WT_rep1_peak_746
chr10	40355693	40356588	896	40355949	238.95	214.154	18.5721	210.261	WT_rep1_peak_747
chr10	41327456	41328039	584	41327706	205.47	172.187	15.9808	168.39	WT_rep1_peak_748
chr10	41404550	41404903	354	41404834	106.35	26.9248	3.46277	23.7515	WT_rep1_peak_749
chr10	41686884	41687268	385	41687009	91.9	48.1948	7.19074	44.8565	WT_rep1_peak_750
chr10	41783447	41783883	437	41783619	125.38	80.8986	9.78203	77.3926	WT_rep1_peak_751
chr10	42061865	42062440	576	42062180	253.39	233.901	19.6899	229.968	WT_rep1_peak_752
chr10	42072462	42072964	503	42072595	600	769.208	46.5174	764.647	WT_rep1_peak_753
chr10	42189342	42189657	316	42189543	42.01	11.5422	3.32921	8.56181	WT_rep1_peak_754
chr10	42439054	42439457	404	42439318	118.16	73.801	9.22312	70.3256	WT_rep1_peak_755
chr10	42690936	42691152	217	42691052	205.47	118.17	8.60296	114.526	WT_rep1_peak_756
chr10	42878798	42880538	1741	42879954	757.55	1016.7	54.1822	1011.95	WT_rep1_peak_757
chr10	42897006	42897483	478	42897154	438.51	421.85	22.4241	417.628	WT_rep1_peak_758
chr10	42897940	42899015	1076	42898391	218.6	36.7874	2.71111	33.5324	WT_rep1_peak_759
chr10	43033933	43034084	152	43034046	83.37	36.2478	5.62467	32.9948	WT_rep1_peak_760
chr10	43387814	43388181	368	43387952	58.42	21.7229	4.59945	18.6043	WT_rep1_peak_761
chr10	43401313	43401502	190	43401393	55.8	15.3735	3.54993	12.3353	WT_rep1_peak_762
chr10	43408804	43409159	356	43408937	108.32	63.9727	8.46098	60.5453	WT_rep1_peak_763
chr10	45034398	45034898	501	45034759	70.24	30.6126	5.51402	27.4041	WT_rep1_peak_764
chr10	45193874	45194041	168	45194007	63.02	25.311	4.95512	22.1528	WT_rep1_peak_765
chr10	48976014	48976321	308	48976247	73.52	32.9771	5.76807	29.7501	WT_rep1_peak_766
chr10	48976607	48977424	818	48977021	238.29	214.154	18.5213	210.261	WT_rep1_peak_767
chr10	50494132	50494282	151	50494207	53.17	18.3158	4.19298	15.2352	WT_rep1_peak_768
chr10	52195733	52196086	354	52195982	62.36	24.5796	4.90431	21.4301	WT_rep1_peak_769
chr10	52314531	52314701	171	52314673	47.92	14.4893	3.7865	11.4598	WT_rep1_peak_770
chr10	53154101	53154419	319	53154339	51.2	17.0072	4.04055	13.9434	WT_rep1_peak_771
chr10	53224654	53225281	628	53224759	422.76	478.848	32.7988	474.56	WT_rep1_peak_772
chr10	53575140	53575289	150	53575194	69.58	17.5494	3.36116	14.4824	WT_rep1_peak_773
chr10	53950533	53950817	285	53950671	449.02	271.929	9.57482	267.926	WT_rep1_peak_774
chr10	56263782	56263958	177	56263920	599.35	185.456	4.35033	181.628	WT_rep1_peak_775
chr10	56264256	56265017	762	56264874	1538.73	1528.24	25.2416	1523.19	WT_rep1_peak_776
chr10	56265851	56266443	593	56266192	166.08	52.7453	4.28419	49.3805	WT_rep1_peak_777
chr10	58105065	58107051	1987	58106619	309.19	282.529	19.5704	278.508	WT_rep1_peak_778
chr10	58107252	58107401	150	58107259	38.07	9.35981	3.02436	6.42127	WT_rep1_peak_779
chr10	58117120	58117281	162	58117178	93.22	49.9852	7.29236	46.636	WT_rep1_peak_780
chr10	58312454	58313626	1173	58312813	260.61	76.6132	4.08771	73.1266	WT_rep1_peak_781
chr10	58314654	58315221	568	58314856	319.69	181.892	8.66742	178.072	WT_rep1_peak_782
chr10	58315583	58316237	655	58316095	420.79	410.481	23.1117	406.274	WT_rep1_peak_783
chr10	58318713	58318986	274	58318861	179.21	80.9019	6.21423	77.3958	WT_rep1_peak_784
chr10	58328520	58328953	434	58328808	76.15	35.2041	5.93454	31.9614	WT_rep1_peak_785
chr10	58329460	58329737	278	58329604	78.77	37.0328	6.17455	33.7726	WT_rep1_peak_786
chr10	58972806	58972986	181	58972886	46.61	13.8815	3.68488	10.8628	WT_rep1_peak_787
chr10	59058855	59059247	393	59059102	70.24	30.4404	5.48007	27.2368	WT_rep1_peak_788
chr10	59733171	59733707	537	59733564	223.2	186.493	15.957	182.662	WT_rep1_peak_789
chr10	59786047	59786523	477	59786316	107	62.7315	8.30788	59.313	WT_rep1_peak_790
chr10	59967278	59967498	221	59967372	1914.23	841.195	6.35339	836.578	WT_rep1_peak_791
chr10	60204946	60205223	278	60204966	68.27	29.0663	5.3616	25.8712	WT_rep1_peak_792
chr10	61267359	61267512	154	61267481	57.77	21.0265	4.54864	17.9141	WT_rep1_peak_793
chr10	61416502	61416801	300	61416645	81.4	29.064	4.57781	25.8712	WT_rep1_peak_794
chr10	62104995	62105662	668	62105222	181.84	41.8255	3.32434	38.5329	WT_rep1_peak_795
chr10	62265242	62265409	168	62265275	117.51	49.7552	5.64313	46.4099	WT_rep1_peak_796
chr10	62394901	62395397	497	62395123	278.99	74.6057	3.78883	71.128	WT_rep1_peak_797
chr10	62434161	62434504	344	62434279	56.46	10.1685	2.6116	7.21929	WT_rep1_peak_798
chr10	62472871	62473335	465	62473053	131.95	71.9978	7.82046	68.5309	WT_rep1_peak_799
chr10	62582687	62582971	285	62582833	129.98	64.3785	6.8936	60.9497	WT_rep1_peak_800
chr10	62587523	62587732	210	62587637	221.88	192.269	17.251	188.424	WT_rep1_peak_801
chr10	62588973	62589245	273	62589107	315.1	239.631	13.7434	235.686	WT_rep1_peak_802
chr10	62592305	62592587	283	62592446	136.54	48.5014	4.74286	45.1621	WT_rep1_peak_803
chr10	63081594	63081746	153	63081614	55.14	19.6559	4.3454	16.5595	WT_rep1_peak_804
chr10	63156328	63156661	334	63156597	79.43	37.8606	6.22536	34.5951	WT_rep1_peak_805
chr10	63157559	63157809	251	63157702	78.12	37.0328	6.12374	33.7726	WT_rep1_peak_806
chr10	63765703	63766014	312	63765837	63.02	25.311	4.95512	22.1528	WT_rep1_peak_807
chr10	63923597	63923746	150	63923742	74.84	17.0983	3.15984	14.0338	WT_rep1_peak_808
chr10	63924363	63924616	254	63924571	51.2	17.0072	4.04055	13.9434	WT_rep1_peak_809
chr10	63924816	63925096	281	63925019	89.28	46.4232	6.9875	43.0958	WT_rep1_peak_810
chr10	63925808	63925961	154	63925885	56.46	20.3375	4.44702	17.2345	WT_rep1_peak_811
chr10	67054692	67055577	886	67054900	176.59	104.408	8.87934	100.81	WT_rep1_peak_812
chr10	67062289	67062595	307	67062404	162.8	59.7659	4.96368	56.3628	WT_rep1_peak_813
chr10	67103006	67103753	748	67103257	320.35	304.986	21.4234	300.927	WT_rep1_peak_814
chr10	67377008	67377158	151	67377075	64.33	26.0491	5.05674	22.8824	WT_rep1_peak_815
chr10	67383526	67384225	700	67384099	80.74	19.2397	3.26977	16.1512	WT_rep1_peak_816
chr10	67745048	67745650	603	67745182	1256.46	751.089	9.59892	746.544	WT_rep1_peak_817
chr10	67928666	67928889	224	67928789	84.03	42.0786	6.58103	38.7814	WT_rep1_peak_818
chr10	67931863	67934238	2376	67932467	246.83	224.637	19.1818	220.721	WT_rep1_peak_819
chr10	67934491	67934642	152	67934498	74.18	29.427	5.01198	26.2302	WT_rep1_peak_820
chr10	69387037	69387615	579	69387480	50.55	16.3651	3.98974	13.3114	WT_rep1_peak_821
chr10	69524319	69524498	180	69524403	63.68	25.311	5.00593	22.1528	WT_rep1_peak_822
chr10	69600864	69601027	164	69600992	45.95	13.2827	3.63407	10.2711	WT_rep1_peak_823
chr10	69822255	69822405	151	69822381	143.11	25.6966	2.76333	22.5364	WT_rep1_peak_824
chr10	69822567	69823072	506	69822950	150.99	32.0325	3.12084	28.8156	WT_rep1_peak_825
chr10	69823409	69823988	580	69823521	1144.2	713.261	10.225	708.749	WT_rep1_peak_826
chr10	69825002	69826434	1433	69825952	615.76	473.085	14.4643	468.803	WT_rep1_peak_827
chr10	69828009	69828182	174	69828140	214.66	34.3166	2.63002	31.0799	WT_rep1_peak_828
chr10	69837898	69838255	358	69838129	257.99	214.812	16.1867	210.917	WT_rep1_peak_829
chr10	69859779	69860560	782	69859959	544.86	320.85	9.26756	316.766	WT_rep1_peak_830
chr10	69860857	69861136	280	69861068	46.61	8.03104	2.50571	5.12731	WT_rep1_peak_831
chr10	70028515	70028915	401	70028769	108.32	54.4164	6.83221	51.0432	WT_rep1_peak_832
chr10	70394919	70395639	721	70395389	1270.24	1095.72	18.4238	1090.92	WT_rep1_peak_833
chr10	71064010	71064549	540	71064274	225.16	197.37	17.5051	193.513	WT_rep1_peak_834
chr10	71091152	71091790	639	71091430	267.83	137.292	7.46762	133.588	WT_rep1_peak_835
chr10	71217097	71217860	764	71217526	424.73	408.511	22.4067	404.307	WT_rep1_peak_836
chr10	72510395	72510573	179	72510434	449.67	236.145	7.83098	232.208	WT_rep1_peak_837
chr10	74179650	74179828	179	74179754	201.53	96.6287	6.75108	93.0605	WT_rep1_peak_838
chr10	74481556	74481824	269	74481699	72.87	32.183	5.71726	28.9616	WT_rep1_peak_839
chr10	74826737	74827032	296	74826893	164.11	44.7568	3.7526	41.4405	WT_rep1_peak_840
chr10	74827263	74827512	250	74827367	96.5	15.0359	2.49998	12.0031	WT_rep1_peak_841
chr10	74827723	74827957	235	74827828	67.62	10.5745	2.45054	7.61347	WT_rep1_peak_842
chr10	74850761	74851264	504	74850898	149.02	24.6489	2.63185	21.4991	WT_rep1_peak_843
chr10	74851422	74851913	492	74851557	414.22	466.476	32.1382	462.202	WT_rep1_peak_844
chr10	75018036	75018453	418	75018340	505.47	378.412	13.6884	374.246	WT_rep1_peak_845
chr10	75080954	75081603	650	75081467	103.72	55.1475	7.37466	51.7707	WT_rep1_peak_846
chr10	75081892	75082143	252	75082030	94.53	14.2209	2.44948	11.2003	WT_rep1_peak_847
chr10	75145762	75146020	259	75145880	63.68	25.311	5.00593	22.1528	WT_rep1_peak_848
chr10	75146865	75147015	151	75147007	102.41	20.8485	2.95449	17.7428	WT_rep1_peak_849
chr10	75493071	75493227	157	75493112	108.32	30.4524	3.7695	27.2487	WT_rep1_peak_850
chr10	75874764	75875061	298	75874910	231.07	205.077	17.9624	201.203	WT_rep1_peak_851
chr10	75875471	75876028	558	75875887	120.13	75.8112	9.37555	72.3266	WT_rep1_peak_852
chr10	76225229	76225378	150	76225274	40.04	10.4305	3.17678	7.47053	WT_rep1_peak_853
chr10	76228381	76228552	172	76228489	128.01	83.9924	9.98527	80.4728	WT_rep1_peak_854
chr10	76306794	76306976	183	76306918	68.93	29.0663	5.41241	25.8712	WT_rep1_peak_855
chr10	77130415	77130705	291	77130543	362.36	279.02	14.1939	275.005	WT_rep1_peak_856
chr10	77157745	77158401	657	77157868	158.86	67.8215	5.8344	64.3768	WT_rep1_peak_857
chr10	77914478	77914708	231	77914587	87.97	44.6706	6.88588	41.3547	WT_rep1_peak_858
chr10	78007337	78007673	337	78007523	537.64	611.04	33.6649	606.616	WT_rep1_peak_859
chr10	78007830	78007982	153	78007905	116.19	55.9518	6.51072	52.5694	WT_rep1_peak_860
chr10	78023307	78023750	444	78023607	227.79	86.3218	5.19979	82.7934	WT_rep1_peak_861
chr10	78025281	78025434	154	78025355	68.27	29.0663	5.3616	25.8712	WT_rep1_peak_862
chr10	78105292	78106012	721	78105727	252.08	189.915	13.32	186.076	WT_rep1_peak_863
chr10	78109246	78109981	736	78109475	772.65	420.589	8.31882	416.368	WT_rep1_peak_864
chr10	78421489	78421640	152	78421514	60.39	23.1372	4.75188	20.0029	WT_rep1_peak_865
chr10	78901221	78901477	257	78901244	42.67	11.5422	3.38002	8.56181	WT_rep1_peak_866
chr10	78901768	78901917	150	78901816	45.3	13.2827	3.58326	10.2711	WT_rep1_peak_867
chr10	78902839	78903046	208	78902850	60.39	23.1372	4.75188	20.0029	WT_rep1_peak_868
chr10	78903571	78903722	152	78903613	59.08	22.4265	4.65026	19.2986	WT_rep1_peak_869
chr10	79474502	79475067	566	79474713	165.43	113.739	11.0951	110.11	WT_rep1_peak_870
chr10	79511640	79511934	295	79511806	183.15	145.461	14.2533	141.734	WT_rep1_peak_871
chr10	79523798	79524281	484	79523922	161.49	114.241	11.6063	110.608	WT_rep1_peak_872
chr10	79560160	79560548	389	79560377	298.69	132.389	6.2435	128.7	WT_rep1_peak_873
chr10	79594434	79594817	384	79594523	115.54	46.1876	5.29711	42.8643	WT_rep1_peak_874
chr10	79813005	79813157	153	79813144	99.78	36.4573	4.79912	33.2035	WT_rep1_peak_875
chr10	79952475	79952672	198	79952586	94.53	50.8873	7.39398	47.5337	WT_rep1_peak_876
chr10	79960545	79960696	152	79960615	97.81	45.1606	6.17575	41.8428	WT_rep1_peak_877
chr10	79966492	79967283	792	79967018	680.75	530.958	14.9178	526.617	WT_rep1_peak_878
chr10	79967504	79967875	372	79967625	1805.26	798.924	6.40516	794.337	WT_rep1_peak_879
chr10	80068662	80068823	162	80068720	38.07	9.35981	3.02436	6.42127	WT_rep1_peak_880
chr10	80147416	80148253	838	80147680	168.05	120.951	11.9051	117.298	WT_rep1_peak_881
chr10	80148858	80149930	1073	80149239	246.17	96.4339	5.37329	92.866	WT_rep1_peak_882
chr10	80150287	80150582	296	80150434	114.88	47.4515	5.51809	44.1191	WT_rep1_peak_883
chr10	80151462	80152515	1054	80151643	128.67	51.9382	5.40273	48.5776	WT_rep1_peak_884
chr10	80171319	80171566	248	80171451	63.02	25.311	4.95512	22.1528	WT_rep1_peak_885
chr10	80217124	80217763	640	80217428	109.63	64.9382	8.5626	61.5066	WT_rep1_peak_886
chr10	80228467	80228815	349	80228678	160.18	29.3551	2.81529	26.1587	WT_rep1_peak_887
chr10	80245706	80245860	155	80245781	426.7	360.511	17.1079	356.37	WT_rep1_peak_888
chr10	80385527	80386047	521	80385960	89.28	10.5704	2.14948	7.60942	WT_rep1_peak_889
chr10	80419538	80419689	152	80419597	191.69	57.1602	4.09969	53.7722	WT_rep1_peak_890
chr10	80451199	80451467	269	80451289	56.46	20.3375	4.44702	17.2345	WT_rep1_peak_891
chr10	80470146	80470295	150	80470225	255.36	36.1577	2.46502	32.9071	WT_rep1_peak_892
chr10	80670077	80670578	502	80670220	74.84	33.7769	5.86969	30.5425	WT_rep1_peak_893
chr10	80670847	80670997	151	80670944	45.3	13.2827	3.58326	10.2711	WT_rep1_peak_894
chr10	80767815	80767964	150	80767859	54.49	18.982	4.29459	15.8951	WT_rep1_peak_895
chr10	80855936	80856309	374	80855986	114.22	31.4965	3.71689	28.2822	WT_rep1_peak_896
chr10	80856488	80857100	613	80856712	185.12	147.846	14.4057	144.112	WT_rep1_peak_897
chr10	80866891	80867450	560	80867025	99.12	50.3219	6.83447	46.9715	WT_rep1_peak_898
chr10	80983967	80984382	416	80984191	1487.53	907.551	9.92354	902.885	WT_rep1_peak_899
chr10	80987725	80987874	150	80987798	74.18	32.5864	5.58956	29.3633	WT_rep1_peak_900
chr10	80989632	80989945	314	80989801	78.77	37.0328	6.17455	33.7726	WT_rep1_peak_901
chr10	81040357	81040798	442	81040500	236.32	99.0779	5.7884	95.4999	WT_rep1_peak_902
chr10	81041814	81042141	328	81041998	334.14	239.562	12.4355	235.617	WT_rep1_peak_903
chr10	81098555	81098789	235	81098671	616.41	198.003	4.50666	194.145	WT_rep1_peak_904
chr10	81099657	81099945	289	81099800	49.23	15.7313	3.88812	12.6844	WT_rep1_peak_905
chr10	81153608	81155090	1483	81154679	1217.07	905.016	13.7947	900.351	WT_rep1_peak_906
chr10	81155253	81155644	392	81155401	408.97	183.274	6.39084	179.452	WT_rep1_peak_907
chr10	81161837	81162021	185	81161934	76.81	35.3937	6.02212	32.1463	WT_rep1_peak_908
chr10	81199686	81199997	312	81199766	77.46	26.3572	4.359	23.1892	WT_rep1_peak_909
chr10	81202939	81203171	233	81203056	54.49	13.6808	3.26388	10.6669	WT_rep1_peak_910
chr10	81236175	81236911	737	81236752	193	94.2435	6.92851	90.684	WT_rep1_peak_911
chr10	81295804	81297634	1831	81297410	1054.27	638.685	9.77102	634.236	WT_rep1_peak_912
chr10	81478703	81479028	326	81478841	135.89	91.3273	10.595	87.778	WT_rep1_peak_913
chr10	81944783	81945012	230	81944904	70.24	30.6126	5.51402	27.4041	WT_rep1_peak_914
chr10	81987367	81987653	287	81987637	34.79	7.34946	2.77031	4.45702	WT_rep1_peak_915
chr10	83027327	83027603	277	83027466	148.36	65.2768	5.97437	61.8439	WT_rep1_peak_916
chr10	83152250	83152478	229	83152265	65.65	23.0702	4.44305	19.9391	WT_rep1_peak_917
chr10	83201609	83201888	280	83201743	91.9	48.1948	7.19074	44.8565	WT_rep1_peak_918
chr10	83427483	83427632	150	83427542	61.71	23.8549	4.8535	20.7118	WT_rep1_peak_919
chr10	83430040	83430746	707	83430199	95.84	51.794	7.4956	48.4339	WT_rep1_peak_920
chr10	83436610	83436946	337	83436672	238.95	109.837	6.48514	106.22	WT_rep1_peak_921
chr10	84207159	84207325	167	84207277	217.94	147.266	11.0858	143.534	WT_rep1_peak_922
chr10	84209689	84209994	306	84209869	302.63	300.974	23.5006	296.922	WT_rep1_peak_923
chr10	84210143	84210822	680	84210682	151.64	75.1965	6.93825	71.716	WT_rep1_peak_924
chr10	84363205	84363638	434	84363448	198.25	163.567	15.4219	159.792	WT_rep1_peak_925
chr10	84363876	84364137	262	84364003	44.64	12.6931	3.53245	9.69272	WT_rep1_peak_926
chr10	84783426	84783749	324	84783574	121.44	76.8216	9.47717	73.3332	WT_rep1_peak_927
chr10	84851144	84851298	155	84851164	61.71	23.8549	4.8535	20.7118	WT_rep1_peak_928
chr10	84950236	84950691	456	84950431	249.45	228.597	19.385	224.674	WT_rep1_peak_929
chr10	84955529	84955739	211	84955657	57.11	21.0265	4.49783	17.9141	WT_rep1_peak_930
chr10	84956194	84956343	150	84956281	54.49	18.982	4.29459	15.8951	WT_rep1_peak_931
chr10	85494247	85494669	423	85494313	50.55	16.3651	3.98974	13.3114	WT_rep1_peak_932
chr10	85728775	85729127	353	85728922	134.57	90.2698	10.4934	86.725	WT_rep1_peak_933
chr10	85885497	85885795	299	85885646	63.68	25.311	5.00593	22.1528	WT_rep1_peak_934
chr10	85890261	85890417	157	85890302	57.11	21.0265	4.49783	17.9141	WT_rep1_peak_935
chr10	85890658	85890892	235	85890791	42.01	11.5422	3.32921	8.56181	WT_rep1_peak_936
chr10	86669987	86670872	886	86670562	653.17	658.5	25.4048	654.033	WT_rep1_peak_937
chr10	87327569	87327766	198	87327667	82.06	40.3758	6.4286	37.0906	WT_rep1_peak_938
chr10	88203086	88203270	185	88203192	46.61	13.8815	3.68488	10.8628	WT_rep1_peak_939
chr10	88203431	88203766	336	88203638	71.55	31.3948	5.61564	28.181	WT_rep1_peak_940
chr10	88269488	88269807	320	88269737	114.88	24.0258	3.04947	20.882	WT_rep1_peak_941
chr10	88281775	88282075	301	88281981	67.62	28.3025	5.31079	25.1155	WT_rep1_peak_942
chr10	89476146	89476808	663	89476686	250.77	229.92	19.4867	225.994	WT_rep1_peak_943
chr10	89640655	89641116	462	89640929	254.71	235.231	19.7915	231.295	WT_rep1_peak_944
chr10	89641550	89642004	455	89641773	265.21	249.976	20.6045	246.011	WT_rep1_peak_945
chr10	89655189	89655698	510	89655575	103.72	59.2048	8.10531	55.8037	WT_rep1_peak_946
chr10	90421692	90422009	318	90421883	150.99	107.56	11.7636	103.95	WT_rep1_peak_947
chr10	90437625	90437859	235	90437743	77.46	36.2105	6.07293	32.9577	WT_rep1_peak_948
chr10	90440438	90440673	236	90440564	65.65	26.7938	5.15836	23.6212	WT_rep1_peak_949
chr10	90767517	90767820	304	90767691	187.75	70.3888	5.10126	66.9302	WT_rep1_peak_950
chr10	90772879	90773029	151	90772908	57.11	21.0265	4.49783	17.9141	WT_rep1_peak_951
chr10	90803021	90803400	380	90803333	84.03	25.2608	3.89137	22.1077	WT_rep1_peak_952
chr10	90805604	90805860	257	90805852	119.48	28.0133	3.29617	24.83	WT_rep1_peak_953
chr10	90937636	90938019	384	90937725	50.55	16.3651	3.98974	13.3114	WT_rep1_peak_954
chr10	90985076	90985345	270	90985133	38.07	9.35981	3.02436	6.42127	WT_rep1_peak_955
chr10	93075057	93075744	688	93075365	799.56	921.049	35.6599	916.372	WT_rep1_peak_956
chr10	93805366	93806637	1272	93806143	789.06	668.637	17.5569	664.162	WT_rep1_peak_957
chr10	93880155	93880502	348	93880354	71.55	31.3948	5.61564	28.181	WT_rep1_peak_958
chr10	94414911	94415107	197	94415046	264.55	126.477	6.80903	122.806	WT_rep1_peak_959
chr10	94422672	94423256	585	94422983	144.42	100.986	11.2555	97.4004	WT_rep1_peak_960
chr10	95248639	95248972	334	95248837	58.42	21.7229	4.59945	18.6043	WT_rep1_peak_961
chr10	95378126	95378431	306	95378170	81.4	34.8006	5.51175	31.5598	WT_rep1_peak_962
chr10	95383020	95383172	153	95383043	78.12	22.7318	3.76754	19.6023	WT_rep1_peak_963
chr10	95874498	95874679	182	95874572	122.1	77.8356	9.52798	74.342	WT_rep1_peak_964
chr10	96454053	96454762	710	96454365	284.25	204.413	12.402	200.541	WT_rep1_peak_965
chr10	98804738	98804922	185	98804806	999.78	704.251	12.5098	699.746	WT_rep1_peak_966
chr10	98815425	98815596	172	98815559	344.64	112.954	4.54789	109.327	WT_rep1_peak_967
chr10	98830376	98830569	194	98830508	862.58	120.321	2.49591	116.67	WT_rep1_peak_968
chr10	98858604	98859527	924	98859075	3319.7	3871.01	38.3232	3865.17	WT_rep1_peak_969
chr10	98942732	98942898	167	98942766	85.34	42.9376	6.68264	39.6335	WT_rep1_peak_970
chr10	99100470	99100778	309	99100617	89.28	34.725	5.01545	31.4844	WT_rep1_peak_971
chr10	99932075	99932739	665	99932524	155.58	113.117	12.1193	109.489	WT_rep1_peak_972
chr10	100282526	100283450	925	100282979	258.64	240.57	20.0964	236.622	WT_rep1_peak_973
chr10	100408766	100408922	157	100408790	61.05	23.8549	4.80269	20.7118	WT_rep1_peak_974
chr10	102224115	102225079	965	102224841	190.37	153.847	14.8122	150.097	WT_rep1_peak_975
chr10	103254082	103254262	181	103254141	51.2	17.0072	4.04055	13.9434	WT_rep1_peak_976
chr10	105025652	105025865	214	105025743	76.15	35.3937	5.97131	32.1463	WT_rep1_peak_977
chr10	105206077	105206333	257	105206204	71.55	31.3948	5.61564	28.181	WT_rep1_peak_978
chr10	105411084	105411407	324	105411176	61.05	23.8549	4.80269	20.7118	WT_rep1_peak_979
chr10	105682738	105683204	467	105682879	129.98	64.3785	6.8936	60.9497	WT_rep1_peak_980
chr10	106430205	106430375	171	106430335	53.17	18.1928	4.16715	15.1184	WT_rep1_peak_981
chr10	106664606	106664756	151	106664746	264.55	31.1755	2.25044	27.9646	WT_rep1_peak_982
chr10	106715146	106715482	337	106715354	204.16	124.453	9.32537	120.788	WT_rep1_peak_983
chr10	106715684	106716133	450	106715927	224.51	91.9659	5.63771	88.4151	WT_rep1_peak_984
chr10	108096611	108096785	175	108096715	369.59	63.7529	2.78636	60.3286	WT_rep1_peak_985
chr10	108107457	108107606	150	108107536	87.97	35.1686	5.23325	31.9263	WT_rep1_peak_986
chr10	108112932	108113513	582	108113077	278.99	214.226	13.9997	210.333	WT_rep1_peak_987
chr10	108384189	108384472	284	108384328	69.58	21.2117	3.92136	18.0984	WT_rep1_peak_988
chr10	108610159	108610349	191	108610229	45.3	13.1828	3.56119	10.1787	WT_rep1_peak_989
chr10	108635325	108635476	152	108635380	77.46	36.018	6.03553	32.7681	WT_rep1_peak_990
chr10	108730241	108730455	215	108730376	60.39	23.1372	4.75188	20.0029	WT_rep1_peak_991
chr10	108776820	108776991	172	108776890	79.43	33.1624	5.36209	29.9347	WT_rep1_peak_992
chr10	108799259	108799409	151	108799264	59.74	13.2859	3.03688	10.2742	WT_rep1_peak_993
chr10	109519697	109519981	285	109519770	43.98	12.1128	3.48164	9.12036	WT_rep1_peak_994
chr10	109602930	109603100	171	109602957	95.19	22.0472	3.20621	18.9267	WT_rep1_peak_995
chr10	109688610	109689352	743	109688883	66.96	10.1694	2.42709	7.22014	WT_rep1_peak_996
chr10	110044461	110044610	150	110044595	49.23	14.3049	3.58816	11.283	WT_rep1_peak_997
chr10	110052586	110053003	418	110052757	145.73	102.074	11.3571	98.4842	WT_rep1_peak_998
chr10	110779939	110780330	392	110780187	1330.64	2154.85	103.068	2149.53	WT_rep1_peak_999
chr10	111127273	111127422	150	111127314	80.74	38.6937	6.32698	35.421	WT_rep1_peak_1000
chr10	111128974	111129316	343	111129169	124.07	79.8741	9.68041	76.3721	WT_rep1_peak_1001
chr10	111343873	111344310	438	111343987	112.91	67.8584	8.81665	64.4111	WT_rep1_peak_1002
chr10	112106161	112106310	150	112106201	36.11	6.61607	2.47368	3.74541	WT_rep1_peak_1003
chr10	112291444	112291837	394	112291714	114.88	69.8243	8.96908	66.3675	WT_rep1_peak_1004
chr10	112292140	112292423	284	112292285	175.93	58.6529	4.53668	55.2562	WT_rep1_peak_1005
chr10	112299535	112299694	160	112299588	70.9	30.6126	5.56483	27.4041	WT_rep1_peak_1006
chr10	112300927	112301480	554	112301035	116.19	71.8053	9.07069	68.339	WT_rep1_peak_1007
chr10	112762966	112763721	756	112763361	297.37	203.766	11.476	199.896	WT_rep1_peak_1008
chr10	112764056	112764484	429	112764276	2137.42	1399.16	11.1376	1394.18	WT_rep1_peak_1009
chr10	114236616	114237365	750	114236850	59.08	22.4265	4.65026	19.2986	WT_rep1_peak_1010
chr10	115126544	115126777	234	115126651	147.7	42.259	3.91323	38.9611	WT_rep1_peak_1011
chr10	115208234	115208789	556	115208511	255.36	236.563	19.8423	232.625	WT_rep1_peak_1012
chr10	115226447	115226960	514	115226778	477.9	284.472	9.39021	280.448	WT_rep1_peak_1013
chr10	115233782	115233931	150	115233868	57.11	21.0265	4.49783	17.9141	WT_rep1_peak_1014
chr10	115236496	115236751	256	115236618	87.97	44.6706	6.88588	41.3547	WT_rep1_peak_1015
chr10	115237411	115237572	162	115237551	198.91	36.448	2.85581	33.1943	WT_rep1_peak_1016
chr10	115247780	115248036	257	115247917	43.33	12.1128	3.43083	9.12036	WT_rep1_peak_1017
chr10	116223557	116223826	270	116223702	101.75	57.3264	7.95288	53.935	WT_rep1_peak_1018
chr10	116253862	116254149	288	116254011	186.43	29.601	2.60325	26.4035	WT_rep1_peak_1019
chr10	116321157	116321322	166	116321270	112.91	67.8584	8.81665	64.4111	WT_rep1_peak_1020
chr10	116741131	116741286	156	116741160	57.77	21.0265	4.54864	17.9141	WT_rep1_peak_1021
chr10	116742696	116743052	357	116742831	322.32	253.863	14.6964	249.892	WT_rep1_peak_1022
chr10	116909558	116910837	1280	116910187	427.35	445.227	26.7721	440.976	WT_rep1_peak_1023
chr10	117051305	117051827	523	117051727	324.29	250.108	14.143	246.143	WT_rep1_peak_1024
chr10	117185256	117185406	151	117185300	63.02	25.311	4.95512	22.1528	WT_rep1_peak_1025
chr10	117525986	117526715	730	117526470	416.85	453.649	29.7402	449.389	WT_rep1_peak_1026
chr10	117570946	117571485	540	117571369	58.42	21.7229	4.59945	18.6043	WT_rep1_peak_1027
chr10	118695278	118696368	1091	118695537	804.16	970.255	40.258	965.543	WT_rep1_peak_1028
chr10	118696525	118696915	391	118696798	109.63	25.3436	3.25377	22.1851	WT_rep1_peak_1029
chr10	119038702	119038974	273	119038846	137.2	32.9806	3.37072	29.7536	WT_rep1_peak_1030
chr10	119046795	119047797	1003	119047033	192.34	109.25	8.40617	105.636	WT_rep1_peak_1031
chr10	119338755	119339032	278	119338968	66.3	15.9286	3.20486	12.8805	WT_rep1_peak_1032
chr10	119350260	119350416	157	119350344	67.62	28.3025	5.31079	25.1155	WT_rep1_peak_1033
chr10	120063909	120064058	150	120063947	53.17	18.1928	4.16715	15.1184	WT_rep1_peak_1034
chr10	120067011	120067339	329	120067140	237.64	109.015	6.44966	105.401	WT_rep1_peak_1035
chr10	121100209	121100660	452	121100426	149.02	106.457	11.6112	102.851	WT_rep1_peak_1036
chr10	121101608	121102064	457	121101842	105.69	61.0998	8.25774	57.688	WT_rep1_peak_1037
chr10	121102234	121103402	1169	121102481	152.3	109.774	11.8652	106.157	WT_rep1_peak_1038
chr10	121231129	121231459	331	121231318	229.76	149.858	10.4891	146.119	WT_rep1_peak_1039
chr10	121248292	121248499	208	121248380	138.51	85.7056	9.30083	82.1796	WT_rep1_peak_1040
chr10	121586731	121587174	444	121587036	108.32	63.9727	8.46098	60.5453	WT_rep1_peak_1041
chr10	121620438	121620750	313	121620604	143.11	99.9004	11.1539	96.3187	WT_rep1_peak_1042
chr10	121621211	121621556	346	121621357	73.52	32.9771	5.76807	29.7501	WT_rep1_peak_1043
chr10	121915387	121915615	229	121915478	30.2	5.52916	2.41464	2.68604	WT_rep1_peak_1044
chr10	122777130	122777293	164	122777241	185.78	74.6886	5.49345	71.2105	WT_rep1_peak_1045
chr10	122848576	122848738	163	122848688	56.46	20.3375	4.44702	17.2345	WT_rep1_peak_1046
chr10	122949274	122949639	366	122949489	619.7	799.926	47.7458	795.339	WT_rep1_peak_1047
chr10	123100708	123101132	425	123101074	102.41	30.7463	3.9772	27.5373	WT_rep1_peak_1048
chr10	123179614	123179774	161	123179636	77.46	36.2105	6.07293	32.9577	WT_rep1_peak_1049
chr10	123574763	123575343	581	123575187	74.18	33.7769	5.81888	30.5425	WT_rep1_peak_1050
chr10	125063903	125064272	370	125064124	275.71	263.551	21.4174	259.563	WT_rep1_peak_1051
chr10	126832338	126832493	156	126832468	95.84	22.0472	3.22809	18.9267	WT_rep1_peak_1052
chr10	126891963	126892650	688	126892214	84.03	39.3394	6.07332	36.0639	WT_rep1_peak_1053
chr10	126903469	126903625	157	126903496	64.99	24.061	4.71352	20.9169	WT_rep1_peak_1054
chr10	126916002	126916512	511	126916250	1982.5	762.641	5.46419	758.086	WT_rep1_peak_1055
chr10	126927643	126928287	645	126927780	3177.25	1774.02	8.73146	1768.84	WT_rep1_peak_1056
chr10	127007635	127008069	435	127007909	133.26	29.8359	3.19668	26.6357	WT_rep1_peak_1057
chr10	127018514	127018680	167	127018593	274.4	115.644	5.85955	112.008	WT_rep1_peak_1058
chr10	127034309	127034526	218	127034426	217.94	187.2	16.9462	183.368	WT_rep1_peak_1059
chr10	127131942	127132334	393	127132002	75.49	24.0035	4.09051	20.8598	WT_rep1_peak_1060
chr10	127334389	127334639	251	127334535	512.69	392.314	14.2692	388.129	WT_rep1_peak_1061
chr10	127334780	127335040	261	127334927	181.84	89.6458	6.97857	86.1038	WT_rep1_peak_1062
chr10	127497174	127497422	249	127497280	361.71	166.972	6.59469	163.188	WT_rep1_peak_1063
chr10	127954725	127955300	576	127955136	104.38	20.0777	2.84802	16.9791	WT_rep1_peak_1064
chr10	128127193	128127350	158	128127235	49.89	15.7313	3.93893	12.6844	WT_rep1_peak_1065
chr10	128273986	128274306	321	128274208	569.8	352.886	10.0141	348.755	WT_rep1_peak_1066
chr10	128319864	128320192	329	128319934	481.18	75.1215	2.63488	71.6412	WT_rep1_peak_1067
chr10	128324730	128325260	531	128325153	255.36	110.212	6.00379	106.594	WT_rep1_peak_1068
chr10	128338291	128338835	545	128338551	238.95	214.154	18.5721	210.261	WT_rep1_peak_1069
chr10	128339658	128339807	150	128339661	49.89	15.7313	3.93893	12.6844	WT_rep1_peak_1070
chr10	128379662	128380088	427	128379801	194.31	158.69	15.117	154.926	WT_rep1_peak_1071
chr10	128380282	128380447	166	128380419	89.28	46.4232	6.9875	43.0958	WT_rep1_peak_1072
chr10	128642204	128643441	1238	128642756	417.51	430.719	26.1567	426.486	WT_rep1_peak_1073
chr10	128649832	128649981	150	128649908	64.33	26.0491	5.05674	22.8824	WT_rep1_peak_1074
chr10	128718933	128719578	646	128719460	200.22	98.4168	6.9386	94.8413	WT_rep1_peak_1075
chr10	128721073	128721222	150	128721157	64.99	26.0491	5.10755	22.8824	WT_rep1_peak_1076
chr11	3241177	3241370	194	3241269	50.55	16.3651	3.98974	13.3114	WT_rep1_peak_1077
chr11	3257859	3258147	289	3258006	52.52	17.6575	4.14217	14.587	WT_rep1_peak_1078
chr11	3281150	3281301	152	3281283	50.55	16.3651	3.98974	13.3114	WT_rep1_peak_1079
chr11	3291809	3292309	501	3292101	57.11	21.0265	4.49783	17.9141	WT_rep1_peak_1080
chr11	3295226	3295661	436	3295386	99.78	42.2283	5.59897	38.9305	WT_rep1_peak_1081
chr11	3366651	3367965	1315	3367816	117.51	72.8013	9.17231	69.331	WT_rep1_peak_1082
chr11	3589932	3590103	172	3590008	236.32	152.832	10.3185	149.085	WT_rep1_peak_1083
chr11	3590375	3591330	956	3590516	395.84	437.364	30.7156	433.122	WT_rep1_peak_1084
chr11	3591743	3592051	309	3591866	84.68	42.0786	6.63183	38.7814	WT_rep1_peak_1085
chr11	3594825	3595616	792	3595308	357.11	318.896	18.848	314.815	WT_rep1_peak_1086
chr11	3596500	3597122	623	3596950	316.41	320.795	24.5676	316.711	WT_rep1_peak_1087
chr11	3600197	3600347	151	3600295	63.68	25.311	5.00593	22.1528	WT_rep1_peak_1088
chr11	3638989	3639278	290	3639132	177.9	137.882	13.7615	134.176	WT_rep1_peak_1089
chr11	3639782	3640205	424	3640061	75.49	34.5825	5.9205	31.3426	WT_rep1_peak_1090
chr11	3847426	3847750	325	3847524	133.26	57.8922	5.83742	54.4992	WT_rep1_peak_1091
chr11	4164953	4165131	179	4165073	58.42	21.7229	4.59945	18.6043	WT_rep1_peak_1092
chr11	4432657	4432807	151	4432672	95.19	39.1728	5.34368	35.8982	WT_rep1_peak_1093
chr11	4437394	4438090	697	4437464	78.12	25.4922	4.16412	22.3327	WT_rep1_peak_1094
chr11	4438239	4438521	283	4438380	237.64	102.038	5.96593	98.4496	WT_rep1_peak_1095
chr11	4843195	4843369	175	4843248	48.58	10.5653	2.91634	7.60431	WT_rep1_peak_1096
chr11	4888891	4889807	917	4889696	204.16	52.2388	3.59926	48.877	WT_rep1_peak_1097
chr11	5009917	5010354	438	5010088	1217.07	1428.26	38.0647	1423.26	WT_rep1_peak_1098
chr11	5010707	5010978	272	5010831	142.45	82.2944	8.4383	78.7824	WT_rep1_peak_1099
chr11	5230945	5231422	478	5231280	73.52	32.9771	5.76807	29.7501	WT_rep1_peak_1100
chr11	5474688	5475317	630	5475171	199.56	106.109	7.71396	102.506	WT_rep1_peak_1101
chr11	5654349	5654498	150	5654489	47.26	14.4893	3.73569	11.4598	WT_rep1_peak_1102
chr11	5665523	5667710	2188	5666700	1215.76	1637.66	56.4621	1632.56	WT_rep1_peak_1103
chr11	5730229	5730858	630	5730471	298.03	295.362	23.145	291.319	WT_rep1_peak_1104
chr11	5919688	5921064	1377	5919980	2919.26	2406.8	16.9783	2401.39	WT_rep1_peak_1105
chr11	5921589	5921853	265	5921718	1328.67	261.739	3.07794	257.753	WT_rep1_peak_1106
chr11	6056617	6057202	586	6057056	1159.3	1084.92	21.8925	1080.12	WT_rep1_peak_1107
chr11	6246901	6247198	298	6247050	433.92	376.88	18.1216	372.716	WT_rep1_peak_1108
chr11	6263697	6263899	203	6263798	95.19	51.794	7.44479	48.4339	WT_rep1_peak_1109
chr11	6354986	6355427	442	6355300	155.58	63.6054	5.53287	60.1817	WT_rep1_peak_1110
chr11	6423051	6424894	1844	6423834	2342.24	3048.4	52.072	3042.75	WT_rep1_peak_1111
chr11	6546218	6546708	491	6546605	93.87	49.9852	7.34317	46.636	WT_rep1_peak_1112
chr11	6550161	6550538	378	6550289	60.39	15.8929	3.41078	12.8453	WT_rep1_peak_1113
chr11	7119319	7119716	398	7119458	928.89	128.362	2.48633	124.685	WT_rep1_peak_1114
chr11	7122085	7122817	733	7122300	3168.72	2123.23	11.6107	2117.92	WT_rep1_peak_1115
chr11	8383196	8384441	1246	8384075	544.86	582.008	28.9581	577.612	WT_rep1_peak_1116
chr11	8442595	8443099	505	8442736	137.2	63.4228	6.2818	59.9998	WT_rep1_peak_1117
chr11	11211518	11211669	152	11211582	55.8	19.6559	4.39621	16.5595	WT_rep1_peak_1118
chr11	11883161	11883350	190	11883259	80.09	38.6937	6.27617	35.421	WT_rep1_peak_1119
chr11	12187535	12187702	168	12187585	61.71	23.8549	4.8535	20.7118	WT_rep1_peak_1120
chr11	12203285	12203694	410	12203360	64.33	26.0491	5.05674	22.8824	WT_rep1_peak_1121
chr11	16231834	16232671	838	16232288	1448.14	1963.56	57.9658	1958.32	WT_rep1_peak_1122
chr11	16861951	16862421	471	16862039	86	42.9376	6.73345	39.6335	WT_rep1_peak_1123
chr11	17028465	17028743	279	17028598	205.47	81.6821	5.43345	78.174	WT_rep1_peak_1124
chr11	17897224	17897373	150	17897227	38.07	9.35981	3.02436	6.42127	WT_rep1_peak_1125
chr11	19970707	19971654	948	19971116	387.31	277.525	12.5261	273.512	WT_rep1_peak_1126
chr11	20174812	20175102	291	20174956	129.32	22.6578	2.71504	19.5288	WT_rep1_peak_1127
chr11	20190050	20190265	216	20190152	45.3	13.1828	3.56119	10.1787	WT_rep1_peak_1128
chr11	20252796	20252945	150	20252872	68.93	25.1341	4.66186	21.9818	WT_rep1_peak_1129
chr11	20253109	20254289	1181	20253693	95.84	45.9806	6.45618	42.6583	WT_rep1_peak_1130
chr11	20597888	20598070	183	20597992	60.39	23.1372	4.75188	20.0029	WT_rep1_peak_1131
chr11	20598510	20599042	533	20598820	83.37	41.2246	6.53022	37.9343	WT_rep1_peak_1132
chr11	20662259	20662457	199	20662318	95.19	51.794	7.44479	48.4339	WT_rep1_peak_1133
chr11	20675696	20677533	1838	20675997	525.17	643.606	40.7251	639.153	WT_rep1_peak_1134
chr11	20775881	20776569	689	20776185	363.02	389.236	28.1751	385.055	WT_rep1_peak_1135
chr11	21094145	21094389	245	21094271	111.6	66.8812	8.71503	63.4394	WT_rep1_peak_1136
chr11	21098014	21098550	537	21098215	418.82	199.394	6.88229	195.533	WT_rep1_peak_1137
chr11	21227835	21227985	151	21227916	50.55	16.3651	3.98974	13.3114	WT_rep1_peak_1138
chr11	21946120	21946269	150	21946135	43.98	12.1128	3.48164	9.12036	WT_rep1_peak_1139
chr11	22045508	22046158	651	22045652	309.19	310.851	24.0087	306.782	WT_rep1_peak_1140
chr11	22468551	22468705	155	22468622	70.9	30.6126	5.56483	27.4041	WT_rep1_peak_1141
chr11	22786066	22787227	1162	22786858	129.32	85.0304	10.0869	81.5061	WT_rep1_peak_1142
chr11	22922252	22923871	1620	22923454	533.04	205.515	5.39437	201.641	WT_rep1_peak_1143
chr11	22924219	22924725	507	22924366	488.4	370.287	13.983	366.133	WT_rep1_peak_1144
chr11	23283432	23283754	323	23283620	108.97	17.2583	2.55748	14.1929	WT_rep1_peak_1145
chr11	23313822	23314486	665	23313957	1144.86	266.465	3.46182	262.471	WT_rep1_peak_1146
chr11	23414379	23414630	252	23414527	158.86	110.961	11.4187	107.341	WT_rep1_peak_1147
chr11	23438540	23439128	589	23438724	236.32	199.423	16.3672	195.562	WT_rep1_peak_1148
chr11	23540860	23541025	166	23540920	39.39	9.88991	3.12597	6.94304	WT_rep1_peak_1149
chr11	23605598	23605789	192	23605722	95.84	51.794	7.4956	48.4339	WT_rep1_peak_1150
chr11	24026802	24027016	215	24026888	81.4	39.5321	6.37779	36.2542	WT_rep1_peak_1151
chr11	24113327	24113786	460	24113654	193.65	57.3019	4.07228	53.9134	WT_rep1_peak_1152
chr11	24113959	24115292	1334	24114075	527.79	109.716	3.16641	106.101	WT_rep1_peak_1153
chr11	24122830	24123082	253	24122971	124.73	77.7404	9.34772	74.2493	WT_rep1_peak_1154
chr11	25562523	25562729	207	25562637	76.81	35.3937	6.02212	32.1463	WT_rep1_peak_1155
chr11	26337066	26337223	158	26337092	82.71	40.3758	6.47941	37.0906	WT_rep1_peak_1156
chr11	28526426	28527362	937	28527232	734.58	411.43	8.65383	407.221	WT_rep1_peak_1157
chr11	28533996	28534149	154	28534013	139.83	29.0563	3.06142	25.8656	WT_rep1_peak_1158
chr11	29138093	29138566	474	29138334	229.1	202.5	17.8099	198.633	WT_rep1_peak_1159
chr11	29171609	29172116	508	29171757	483.81	469.977	23.0861	465.699	WT_rep1_peak_1160
chr11	29403109	29403258	150	29403126	64.33	26.0491	5.05674	22.8824	WT_rep1_peak_1161
chr11	29413152	29414117	966	29413816	377.46	361.636	22.0036	357.493	WT_rep1_peak_1162
chr11	29415493	29415673	181	29415598	60.39	23.1372	4.75188	20.0029	WT_rep1_peak_1163
chr11	29453845	29454381	537	29454059	240.26	116.605	6.89323	112.965	WT_rep1_peak_1164
chr11	29456985	29457152	168	29457112	116.19	55.9518	6.51072	52.5694	WT_rep1_peak_1165
chr11	29457624	29457949	326	29457735	139.83	95.5892	10.8998	92.0235	WT_rep1_peak_1166
chr11	29494859	29495008	150	29495005	72.21	12.6914	2.61465	9.69272	WT_rep1_peak_1167
chr11	29656602	29657743	1142	29656916	820.57	297.787	5.10293	293.741	WT_rep1_peak_1168
chr11	29657969	29658256	288	29658116	469.37	221.688	6.81691	217.78	WT_rep1_peak_1169
chr11	30059051	30059200	150	30059173	121.44	38.4896	4.22223	35.2218	WT_rep1_peak_1170
chr11	30087111	30087269	159	30087142	1411.38	135.159	2.09552	131.461	WT_rep1_peak_1171
chr11	30204590	30204916	327	30204868	47.26	14.4893	3.73569	11.4598	WT_rep1_peak_1172
chr11	30211266	30211443	178	30211357	72.87	23.0977	4.10371	19.9662	WT_rep1_peak_1173
chr11	30842189	30842646	458	30842504	114.88	69.8243	8.96908	66.3675	WT_rep1_peak_1174
chr11	30927304	30927553	250	30927426	118.82	73.801	9.27393	70.3256	WT_rep1_peak_1175
chr11	31310009	31310158	150	31310084	36.76	8.33208	2.92274	5.41642	WT_rep1_peak_1176
chr11	31615354	31615899	546	31615497	198.25	163.567	15.4219	159.792	WT_rep1_peak_1177
chr11	31821011	31821785	775	31821157	333.48	101.338	4.23393	97.7522	WT_rep1_peak_1178
chr11	31822422	31822915	494	31822524	207.44	89.5236	5.95544	85.9818	WT_rep1_peak_1179
chr11	31823111	31823313	203	31823211	108.97	44.9448	5.49859	41.628	WT_rep1_peak_1180
chr11	31881408	31881557	150	31881524	40.04	6.23803	2.28022	3.38149	WT_rep1_peak_1181
chr11	32466053	32466789	737	32466365	101.09	57.3264	7.90207	53.935	WT_rep1_peak_1182
chr11	32694644	32695002	359	32694860	150.99	86.4696	8.44361	82.9408	WT_rep1_peak_1183
chr11	33106735	33106885	151	33106775	83.37	36.2478	5.62467	32.9948	WT_rep1_peak_1184
chr11	35598857	35599362	506	35599046	570.46	342.254	9.52435	338.138	WT_rep1_peak_1185
chr11	35897563	35897914	352	35897797	233.04	101.113	6.00108	97.5271	WT_rep1_peak_1186
chr11	35898068	35899362	1295	35898492	1100.88	1257.16	35.3733	1252.25	WT_rep1_peak_1187
chr11	35914218	35914440	223	35914289	36.76	7.47197	2.71666	4.57829	WT_rep1_peak_1188
chr11	35914659	35915242	584	35914992	151.64	82.1734	7.78783	78.6618	WT_rep1_peak_1189
chr11	35932426	35932601	176	35932481	66.3	18.1432	3.54222	15.0697	WT_rep1_peak_1190
chr11	35937946	35938360	415	35938115	96.5	21.5733	3.14513	18.458	WT_rep1_peak_1191
chr11	36174836	36175002	167	36174925	35.45	7.83499	2.82112	4.93303	WT_rep1_peak_1192
chr11	36248796	36249109	314	36248813	36.11	8.33208	2.87193	5.41642	WT_rep1_peak_1193
chr11	36429947	36430119	173	36430022	155.58	23.6413	2.52549	20.5046	WT_rep1_peak_1194
chr11	36458913	36459185	273	36459047	50.55	16.3651	3.98974	13.3114	WT_rep1_peak_1195
chr11	36496976	36497240	265	36497094	249.45	102.736	5.69213	99.1442	WT_rep1_peak_1196
chr11	36497691	36497842	152	36497778	57.11	21.0265	4.49783	17.9141	WT_rep1_peak_1197
chr11	36509617	36509801	185	36509711	120.79	40.8842	4.51067	37.5972	WT_rep1_peak_1198
chr11	36543902	36544109	208	36543987	287.53	158.503	8.24366	154.741	WT_rep1_peak_1199
chr11	36568374	36568588	215	36568452	78.12	20.3158	3.43993	17.2159	WT_rep1_peak_1200
chr11	37003482	37003654	173	37003592	38.73	9.35981	3.07516	6.42127	WT_rep1_peak_1201
chr11	40308773	40308922	150	40308827	67.62	28.3025	5.31079	25.1155	WT_rep1_peak_1202
chr11	41033035	41033186	152	41033111	68.93	29.0663	5.41241	25.8712	WT_rep1_peak_1203
chr11	41803148	41803410	263	41803286	59.08	19.12	4.00541	16.0324	WT_rep1_peak_1204
chr11	42024459	42024652	194	42024571	364.99	174.575	6.90547	170.774	WT_rep1_peak_1205
chr11	42517468	42518589	1122	42518273	858.65	881.475	26.8639	876.828	WT_rep1_peak_1206
chr11	42519017	42519283	267	42519165	70.9	8.18462	2.11463	5.27967	WT_rep1_peak_1207
chr11	43336734	43337159	426	43337019	198.91	116.908	8.90452	113.268	WT_rep1_peak_1208
chr11	43476423	43477037	615	43476772	95.19	51.794	7.44479	48.4339	WT_rep1_peak_1209
chr11	43477394	43477553	160	43477420	57.77	21.0265	4.54864	17.9141	WT_rep1_peak_1210
chr11	43595471	43596192	722	43595742	446.39	486.029	29.826	481.733	WT_rep1_peak_1211
chr11	43610955	43611386	432	43611074	87.97	44.6706	6.88588	41.3547	WT_rep1_peak_1212
chr11	44345598	44345847	250	44345727	105.03	61.0998	8.20693	57.688	WT_rep1_peak_1213
chr11	44454759	44455629	871	44455054	575.71	528.869	20.5969	524.529	WT_rep1_peak_1214
chr11	45799919	45800274	356	45800103	227.13	86.3218	5.18487	82.7934	WT_rep1_peak_1215
chr11	46331550	46332049	500	46331691	113.57	68.8395	8.86746	65.3881	WT_rep1_peak_1216
chr11	48642968	48643118	151	48643090	64.99	26.0491	5.10755	22.8824	WT_rep1_peak_1217
chr11	48706988	48707474	487	48707124	313.13	186.785	9.23912	182.954	WT_rep1_peak_1218
chr11	48757421	48757581	161	48757457	80.74	38.6937	6.32698	35.421	WT_rep1_peak_1219
chr11	49105755	49106605	851	49106082	462.8	541.668	35.8982	537.315	WT_rep1_peak_1220
chr11	49106838	49108388	1551	49107907	113.57	68.8395	8.86746	65.3881	WT_rep1_peak_1221
chr11	49136161	49136378	218	49136277	237.64	212.852	18.4705	208.962	WT_rep1_peak_1222
chr11	49151948	49152769	822	49152541	148.36	105.357	11.5604	101.756	WT_rep1_peak_1223
chr11	49774140	49774332	193	49774216	110.28	48.6523	5.85709	45.3122	WT_rep1_peak_1224
chr11	50010900	50011251	352	50011043	107	31.1376	3.85723	27.9269	WT_rep1_peak_1225
chr11	50012113	50013075	963	50012829	312.47	315.104	24.2628	311.029	WT_rep1_peak_1226
chr11	50061831	50062283	453	50062097	649.24	537.526	16.6727	533.177	WT_rep1_peak_1227
chr11	50157156	50157480	325	50157425	63.02	25.311	4.95512	22.1528	WT_rep1_peak_1228
chr11	50187033	50187296	264	50187155	269.8	52.968	3.00893	49.6024	WT_rep1_peak_1229
chr11	50705216	50706170	955	50705439	436.54	333.319	14.1143	329.216	WT_rep1_peak_1230
chr11	50706336	50706787	452	50706625	84.68	39.3394	6.12021	36.0639	WT_rep1_peak_1231
chr11	50764009	50764171	163	50764040	55.14	19.6559	4.3454	16.5595	WT_rep1_peak_1232
chr11	50790316	50790466	151	50790354	101.09	57.3264	7.90207	53.935	WT_rep1_peak_1233
chr11	50790622	50790958	337	50790873	103.06	59.2048	8.0545	55.8037	WT_rep1_peak_1234
chr11	51534566	51534892	327	51534711	206.78	166.096	14.8417	162.314	WT_rep1_peak_1235
chr11	51576458	51576770	313	51576590	87.97	44.6706	6.88588	41.3547	WT_rep1_peak_1236
chr11	51634465	51634867	403	51634593	76.15	22.8288	3.85745	19.6988	WT_rep1_peak_1237
chr11	51705771	51706506	736	51706117	567.18	566.608	24.7034	562.229	WT_rep1_peak_1238
chr11	51707809	51708382	574	51708242	101.09	26.3958	3.5205	23.2276	WT_rep1_peak_1239
chr11	51866824	51867015	192	51866829	36.76	4.74413	2.09787	1.92754	WT_rep1_peak_1240
chr11	52012689	52013521	833	52012773	727.35	147.81	3.12598	144.077	WT_rep1_peak_1241
chr11	52018234	52018384	151	52018305	89.28	46.4232	6.9875	43.0958	WT_rep1_peak_1242
chr11	52294030	52294183	154	52294143	130.63	15.8586	2.2311	12.8112	WT_rep1_peak_1243
chr11	53077265	53077967	703	53077367	143.11	94.9415	10.2934	91.3793	WT_rep1_peak_1244
chr11	53080810	53081331	522	53080896	129.32	85.0304	10.0869	81.5061	WT_rep1_peak_1245
chr11	53081654	53082079	426	53081949	147.05	104.26	11.4588	100.662	WT_rep1_peak_1246
chr11	53152367	53152717	351	53152606	107	42.2089	5.14297	38.9113	WT_rep1_peak_1247
chr11	53155917	53156074	158	53155953	167.4	18.6503	2.15893	15.5683	WT_rep1_peak_1248
chr11	53223285	53223489	205	53223381	119.48	74.8043	9.32474	71.3248	WT_rep1_peak_1249
chr11	53290570	53290915	346	53290714	164.77	44.7568	3.76752	41.4405	WT_rep1_peak_1250
chr11	53306116	53306561	446	53306336	342.67	224.195	10.7397	220.281	WT_rep1_peak_1251
chr11	53368077	53368351	275	53368216	304.6	103.701	4.70148	100.107	WT_rep1_peak_1252
chr11	53368736	53369345	610	53369239	111.6	29.7532	3.63218	26.555	WT_rep1_peak_1253
chr11	53484090	53484318	229	53484207	441.14	322.155	13.0041	318.069	WT_rep1_peak_1254
chr11	53491839	53491998	160	53491851	185.78	50.8914	3.81178	47.5377	WT_rep1_peak_1255
chr11	53560459	53560650	192	53560582	66.3	27.5449	5.20917	24.3638	WT_rep1_peak_1256
chr11	54251926	54252264	339	54252050	265.21	112.98	5.91575	109.353	WT_rep1_peak_1257
chr11	54393435	54394464	1030	54394373	221.88	192.269	17.251	188.424	WT_rep1_peak_1258
chr11	54582197	54582544	348	54582341	167.4	126.733	13.0338	123.061	WT_rep1_peak_1259
chr11	54587448	54587791	344	54587573	105.69	26.371	3.4416	23.2029	WT_rep1_peak_1260
chr11	54587975	54588124	150	54588096	40.04	10.345	3.15722	7.39404	WT_rep1_peak_1261
chr11	54801702	54801851	150	54801768	53.17	18.3158	4.19298	15.2352	WT_rep1_peak_1262
chr11	55000521	55000670	150	55000558	52.52	16.1189	3.82261	13.0695	WT_rep1_peak_1263
chr11	55124316	55124503	188	55124464	61.71	23.8549	4.8535	20.7118	WT_rep1_peak_1264
chr11	55390625	55390993	369	55390749	137.86	87.8902	9.77859	84.3556	WT_rep1_peak_1265
chr11	56931187	56931668	482	56931538	185.12	42.9125	3.32359	39.612	WT_rep1_peak_1266
chr11	56975211	56975392	182	56975304	63.68	25.311	5.00593	22.1528	WT_rep1_peak_1267
chr11	57189659	57189930	272	57189813	311.82	73.5385	3.43755	70.0661	WT_rep1_peak_1268
chr11	57204408	57204736	329	57204670	139.83	31.9615	3.27501	28.7451	WT_rep1_peak_1269
chr11	57205865	57206298	434	57206088	120.13	54.3572	6.05658	50.9842	WT_rep1_peak_1270
chr11	57218320	57219204	885	57218628	2220.79	1867.58	17.6403	1862.36	WT_rep1_peak_1271
chr11	57219515	57219673	159	57219622	514.66	146.182	4.02704	142.452	WT_rep1_peak_1272
chr11	57220124	57220913	790	57220634	4507.89	3317.44	13.7048	3311.72	WT_rep1_peak_1273
chr11	57374484	57374717	234	57374629	74.18	16.1382	3.00718	13.0887	WT_rep1_peak_1274
chr11	57420495	57421156	662	57420780	177.9	138.365	13.8468	134.657	WT_rep1_peak_1275
chr11	57422000	57422493	494	57422409	149.02	106.457	11.6112	102.851	WT_rep1_peak_1276
chr11	57949413	57949649	237	57949538	129.32	64.3785	6.85905	60.9497	WT_rep1_peak_1277
chr11	57950046	57950891	846	57950187	253.39	127.827	7.26835	124.152	WT_rep1_peak_1278
chr11	58008363	58008600	238	58008498	54.49	18.982	4.29459	15.8951	WT_rep1_peak_1279
chr11	58012155	58012308	154	58012274	70.24	30.6126	5.51402	27.4041	WT_rep1_peak_1280
chr11	58207434	58207718	285	58207581	80.09	38.6937	6.27617	35.421	WT_rep1_peak_1281
chr11	58749483	58749793	311	58749683	63.68	25.311	5.00593	22.1528	WT_rep1_peak_1282
chr11	58751337	58751498	162	58751364	109.63	64.9382	8.5626	61.5066	WT_rep1_peak_1283
chr11	58781725	58781895	171	58781813	68.93	29.0663	5.41241	25.8712	WT_rep1_peak_1284
chr11	58845815	58846014	200	58845893	152.95	15.1656	2.05273	12.129	WT_rep1_peak_1285
chr11	59048937	59049086	150	59048945	42.01	11.5422	3.32921	8.56181	WT_rep1_peak_1286
chr11	59067197	59067354	158	59067329	65.65	26.7938	5.15836	23.6212	WT_rep1_peak_1287
chr11	59067942	59068208	267	59068075	202.19	100.136	7.00651	96.5535	WT_rep1_peak_1288
chr11	59089355	59089568	214	59089468	34.79	7.34946	2.77031	4.45702	WT_rep1_peak_1289
chr11	59089921	59090075	155	59090002	74.84	33.7769	5.86969	30.5425	WT_rep1_peak_1290
chr11	59090579	59091090	512	59090866	148.36	88.0667	8.78584	84.5318	WT_rep1_peak_1291
chr11	59281630	59281952	323	59281811	42.67	11.5422	3.38002	8.56181	WT_rep1_peak_1292
chr11	59328920	59329072	153	59328994	157.55	47.1158	4.07059	43.7859	WT_rep1_peak_1293
chr11	59346202	59346682	481	59346337	232.39	206.368	18.064	202.492	WT_rep1_peak_1294
chr11	59650008	59650287	280	59650146	538.95	140.251	3.74966	136.538	WT_rep1_peak_1295
chr11	59650693	59650978	286	59650842	200.22	52.306	3.65853	48.9441	WT_rep1_peak_1296
chr11	59682731	59683460	730	59683323	120.79	75.8112	9.42636	72.3266	WT_rep1_peak_1297
chr11	59851484	59851879	396	59851731	108.32	63.9727	8.46098	60.5453	WT_rep1_peak_1298
chr11	59852602	59852751	150	59852742	45.3	13.2827	3.58326	10.2711	WT_rep1_peak_1299
chr11	59854298	59854827	530	59854498	147.05	104.26	11.4588	100.662	WT_rep1_peak_1300
chr11	60076658	60077061	404	60076949	113.57	32.1608	3.8189	28.9435	WT_rep1_peak_1301
chr11	60077752	60078077	326	60077932	252.08	231.871	19.4676	227.942	WT_rep1_peak_1302
chr11	60078414	60078584	171	60078459	64.99	22.0019	4.32716	18.8816	WT_rep1_peak_1303
chr11	60079897	60080368	472	60080306	72.21	32.183	5.66645	28.9616	WT_rep1_peak_1304
chr11	60080760	60081299	540	60080971	136.54	67.6982	6.87715	64.2539	WT_rep1_peak_1305
chr11	60130336	60130665	330	60130549	67.62	22.8287	4.28844	19.6987	WT_rep1_peak_1306
chr11	60332750	60333300	551	60332899	309.85	310.851	24.0595	306.782	WT_rep1_peak_1307
chr11	60333818	60334082	265	60333876	55.14	19.6559	4.3454	16.5595	WT_rep1_peak_1308
chr11	60622432	60622858	427	60622578	146.39	103.165	11.4079	99.5722	WT_rep1_peak_1309
chr11	60668933	60669647	715	60669341	114.22	54.2788	6.40131	50.9062	WT_rep1_peak_1310
chr11	60674752	60675410	659	60675002	78.77	37.0328	6.17455	33.7726	WT_rep1_peak_1311
chr11	60675579	60675834	256	60675689	45.95	13.2827	3.63407	10.2711	WT_rep1_peak_1312
chr11	60755326	60755905	580	60755764	338.08	302.415	18.8375	298.36	WT_rep1_peak_1313
chr11	60961110	60961659	550	60961557	75.49	34.5825	5.9205	31.3426	WT_rep1_peak_1314
chr11	61299397	61299691	295	61299568	57.11	21.0265	4.49783	17.9141	WT_rep1_peak_1315
chr11	61382113	61382481	369	61382220	43.98	12.1128	3.48164	9.12036	WT_rep1_peak_1316
chr11	61408672	61408830	159	61408688	77.46	25.7403	4.26423	22.5799	WT_rep1_peak_1317
chr11	61437015	61437788	774	61437234	877.03	875.059	25.0865	870.416	WT_rep1_peak_1318
chr11	61667831	61668729	899	61668510	857.99	613.633	12.8207	609.207	WT_rep1_peak_1319
chr11	61805886	61806126	241	61805990	79.43	37.8606	6.22536	34.5951	WT_rep1_peak_1320
chr11	62008624	62009083	460	62008860	222.54	75.8296	4.65706	72.345	WT_rep1_peak_1321
chr11	62009617	62010102	486	62009949	212.04	106.044	7.10119	102.442	WT_rep1_peak_1322
chr11	62030047	62030404	358	62030149	110.94	65.9077	8.66422	62.4706	WT_rep1_peak_1323
chr11	62204697	62205705	1009	62205008	194.31	135.279	11.4552	131.582	WT_rep1_peak_1324
chr11	62208282	62208728	447	62208589	389.94	328.82	16.9972	324.723	WT_rep1_peak_1325
chr11	62274083	62274343	261	62274205	150.33	46.8685	4.20357	43.5396	WT_rep1_peak_1326
chr11	62275608	62275793	186	62275685	338.08	155.388	6.52068	151.634	WT_rep1_peak_1327
chr11	62555712	62555984	273	62555837	57.77	21.0265	4.54864	17.9141	WT_rep1_peak_1328
chr11	62604560	62604991	432	62604883	219.26	189.731	17.0478	185.892	WT_rep1_peak_1329
chr11	62670382	62670598	217	62670477	43.33	12.1128	3.43083	9.12036	WT_rep1_peak_1330
chr11	62671237	62672009	773	62671530	86	42.9376	6.73345	39.6335	WT_rep1_peak_1331
chr11	63854826	63855031	206	63854958	57.77	21.0265	4.54864	17.9141	WT_rep1_peak_1332
chr11	65580556	65581750	1195	65581201	1890.6	2270.32	41.1217	2264.96	WT_rep1_peak_1333
chr11	65719008	65719691	684	65719224	283.59	232.937	15.8105	229.006	WT_rep1_peak_1334
chr11	66102953	66103556	604	66103300	60.39	19.7612	4.09294	16.6643	WT_rep1_peak_1335
chr11	66108070	66108682	613	66108473	846.17	868.8	26.8093	864.162	WT_rep1_peak_1336
chr11	66932506	66932713	208	66932575	43.98	12.1128	3.48164	9.12036	WT_rep1_peak_1337
chr11	67568618	67569221	604	67568919	141.79	67.1042	6.53523	63.6618	WT_rep1_peak_1338
chr11	67569436	67569855	420	67569714	131.95	63.5803	6.66572	60.1566	WT_rep1_peak_1339
chr11	67574110	67574294	185	67574250	471.34	77.4275	2.71458	73.9376	WT_rep1_peak_1340
chr11	68590051	68590200	150	68590171	232.39	29.1746	2.31075	25.9789	WT_rep1_peak_1341
chr11	68705916	68706336	421	68706064	319.69	277.941	17.8164	273.928	WT_rep1_peak_1342
chr11	68951584	68951733	150	68951701	42.67	11.5422	3.38002	8.56181	WT_rep1_peak_1343
chr11	68981478	68981827	350	68981778	756.24	162.477	3.24995	158.704	WT_rep1_peak_1344
chr11	69000004	69000153	150	69000058	48.58	9.69681	2.75432	6.7556	WT_rep1_peak_1345
chr11	69231908	69232416	509	69232271	314.44	203.711	10.5148	199.841	WT_rep1_peak_1346
chr11	69295203	69296127	925	69296014	87.97	18.0017	2.96551	14.9293	WT_rep1_peak_1347
chr11	69445766	69446094	329	69445914	201.53	82.7219	5.6259	79.2087	WT_rep1_peak_1348
chr11	69490637	69491154	518	69490733	160.18	33.0195	3.04105	29.7923	WT_rep1_peak_1349
chr11	69514457	69514619	163	69514548	104.38	60.1502	8.15612	56.7447	WT_rep1_peak_1350
chr11	69668876	69669869	994	69669287	680.75	474.592	12.1958	470.308	WT_rep1_peak_1351
chr11	69714000	69714150	151	69714104	311.16	123.821	5.51034	120.158	WT_rep1_peak_1352
chr11	69715758	69716045	288	69715896	470.68	488.996	26.8381	484.697	WT_rep1_peak_1353
chr11	69716213	69716775	563	69716604	305.25	171.204	8.44834	167.41	WT_rep1_peak_1354
chr11	69717752	69718038	287	69717895	183.15	29.0449	2.59368	25.8543	WT_rep1_peak_1355
chr11	69804278	69804427	150	69804355	43.98	7.8147	2.56823	4.91749	WT_rep1_peak_1356
chr11	69880950	69881357	408	69881084	78.77	32.4043	5.31832	29.182	WT_rep1_peak_1357
chr11	69889397	69889880	484	69889587	434.57	405.073	20.9411	400.873	WT_rep1_peak_1358
chr11	69890121	69890446	326	69890301	93.22	49.9852	7.29236	46.636	WT_rep1_peak_1359
chr11	69935467	69935771	305	69935572	612.47	114.314	2.9494	110.682	WT_rep1_peak_1360
chr11	70128978	70129283	306	70129109	119.48	13.6072	2.15134	10.5938	WT_rep1_peak_1361
chr11	70284641	70285679	1039	70285148	311.16	188.566	9.45941	184.731	WT_rep1_peak_1362
chr11	70535110	70535499	390	70535253	147.05	64.4832	5.92185	61.0543	WT_rep1_peak_1363
chr11	70662006	70662460	455	70662099	123.41	20.7753	2.6471	17.6698	WT_rep1_peak_1364
chr11	70662702	70663396	695	70663040	76.81	35.2041	5.98504	31.9614	WT_rep1_peak_1365
chr11	70808181	70808445	265	70808424	724.73	254.865	4.93693	250.892	WT_rep1_peak_1366
chr11	70831225	70831703	479	70831362	704.38	485.554	11.9556	481.259	WT_rep1_peak_1367
chr11	70875103	70875596	494	70875233	205.47	172.187	15.9808	168.39	WT_rep1_peak_1368
chr11	70877351	70878185	835	70877555	456.89	532.146	35.4409	527.803	WT_rep1_peak_1369
chr11	70900801	70901186	386	70900939	98.47	54.5406	7.69884	51.1655	WT_rep1_peak_1370
chr11	70916245	70916603	359	70916457	298.03	258.902	17.5901	254.921	WT_rep1_peak_1371
chr11	70922898	70923294	397	70923024	766.74	500.904	10.9677	496.593	WT_rep1_peak_1372
chr11	71679900	71680364	465	71680072	184.46	109.829	8.98133	106.211	WT_rep1_peak_1373
chr11	72045118	72045454	337	72045314	116.19	71.8053	9.07069	68.339	WT_rep1_peak_1374
chr11	72089356	72089802	447	72089627	178.56	139.542	13.8976	135.831	WT_rep1_peak_1375
chr11	72341836	72342048	213	72341910	66.3	9.53508	2.32076	6.59505	WT_rep1_peak_1376
chr11	72343535	72343838	304	72343709	143.76	42.4791	4.02122	39.1806	WT_rep1_peak_1377
chr11	72358590	72358959	370	72358684	47.92	14.4893	3.7865	11.4598	WT_rep1_peak_1378
chr11	72574423	72574574	152	72574541	63.68	25.311	5.00593	22.1528	WT_rep1_peak_1379
chr11	72658548	72658759	212	72658677	66.3	27.5449	5.20917	24.3638	WT_rep1_peak_1380
chr11	72659203	72659361	159	72659242	157.55	115.36	12.2717	111.724	WT_rep1_peak_1381
chr11	72669002	72669250	249	72669102	55.8	19.6559	4.39621	16.5595	WT_rep1_peak_1382
chr11	72931535	72932302	768	72931983	286.22	191.1	10.9624	187.258	WT_rep1_peak_1383
chr11	73067144	73067358	215	73067214	408.97	290.529	12.4234	286.495	WT_rep1_peak_1384
chr11	73075034	73075540	507	73075460	59.08	22.4265	4.65026	19.2986	WT_rep1_peak_1385
chr11	74560289	74560646	358	74560415	134.57	39.6418	3.98746	36.3634	WT_rep1_peak_1386
chr11	74708205	74708503	299	74708380	34.14	5.13681	2.19598	2.30902	WT_rep1_peak_1387
chr11	74796471	74797050	580	74796944	110.94	65.9077	8.66422	62.4706	WT_rep1_peak_1388
chr11	74819920	74820604	685	74820242	217.94	70.9041	4.46824	67.4427	WT_rep1_peak_1389
chr11	74820989	74821377	389	74821117	63.68	10.995	2.58705	8.02676	WT_rep1_peak_1390
chr11	75068383	75069006	624	75068510	91.9	48.1948	7.19074	44.8565	WT_rep1_peak_1391
chr11	75156499	75157878	1380	75156624	798.25	469.245	9.29362	464.967	WT_rep1_peak_1392
chr11	75341697	75342107	411	75341928	231.73	177.181	13.69	173.372	WT_rep1_peak_1393
chr11	75343305	75343476	172	75343411	91.9	48.1948	7.19074	44.8565	WT_rep1_peak_1394
chr11	75343826	75344403	578	75344162	78.12	37.0328	6.12374	33.7726	WT_rep1_peak_1395
chr11	75463284	75463691	408	75463598	177.9	95.3412	7.77825	91.7779	WT_rep1_peak_1396
chr11	75529033	75529527	495	75529122	54.49	18.982	4.29459	15.8951	WT_rep1_peak_1397
chr11	75582892	75583446	555	75583187	871.77	900.275	27.2742	895.614	WT_rep1_peak_1398
chr11	75594072	75595240	1169	75594829	280.96	208.494	13.1759	204.614	WT_rep1_peak_1399
chr11	75596263	75596601	339	75596459	311.82	218.987	12.0314	215.084	WT_rep1_peak_1400
chr11	75660271	75660459	189	75660407	139.83	65.4399	6.44509	62.0066	WT_rep1_peak_1401
chr11	75662096	75662979	884	75662420	772.65	694.005	19.8372	689.509	WT_rep1_peak_1402
chr11	76101497	76101759	263	76101638	62.36	24.5796	4.90431	21.4301	WT_rep1_peak_1403
chr11	76101938	76102242	305	76102044	49.23	15.7313	3.88812	12.6844	WT_rep1_peak_1404
chr11	76103097	76103276	180	76103140	83.37	41.2246	6.53022	37.9343	WT_rep1_peak_1405
chr11	76103657	76103812	156	76103723	59.08	22.4265	4.65026	19.2986	WT_rep1_peak_1406
chr11	76105200	76105620	421	76105336	72.87	32.005	5.68205	28.7882	WT_rep1_peak_1407
chr11	76140789	76141372	584	76141183	204.81	124.453	9.35521	120.788	WT_rep1_peak_1408
chr11	76309545	76310121	577	76309864	2333.05	2573.52	32.8739	2568.04	WT_rep1_peak_1409
chr11	76312866	76313015	150	76312948	149.02	67.2176	6.12184	63.7748	WT_rep1_peak_1410
chr11	76670213	76671003	791	76670352	196.94	128.488	10.4177	124.81	WT_rep1_peak_1411
chr11	76672451	76673203	753	76672820	296.72	223.448	13.5327	219.536	WT_rep1_peak_1412
chr11	76936477	76937274	798	76937115	349.89	145.837	5.84819	142.109	WT_rep1_peak_1413
chr11	76940237	76940403	167	76940284	81.4	12.9426	2.49699	9.94097	WT_rep1_peak_1414
chr11	77090775	77091039	265	77090902	225.82	197.37	17.5559	193.513	WT_rep1_peak_1415
chr11	77184902	77185174	273	77185027	64.99	26.0491	5.10755	22.8824	WT_rep1_peak_1416
chr11	77340550	77340798	249	77340683	101.75	57.3264	7.95288	53.935	WT_rep1_peak_1417
chr11	77344385	77345155	771	77344519	198.91	102.247	7.40394	98.6571	WT_rep1_peak_1418
chr11	77345426	77346485	1060	77346185	661.71	872.5	50.9776	867.859	WT_rep1_peak_1419
chr11	77348658	77348827	170	77348791	73.52	32.9771	5.76807	29.7501	WT_rep1_peak_1420
chr11	77360292	77360486	195	77360416	89.28	46.4232	6.9875	43.0958	WT_rep1_peak_1421
chr11	77428651	77428920	270	77428781	437.2	87.2626	3.06434	83.7297	WT_rep1_peak_1422
chr11	77577002	77577171	170	77577099	119.48	29.6712	3.44215	26.4734	WT_rep1_peak_1423
chr11	77582342	77583275	934	77582799	401.1	393.262	23.1755	389.076	WT_rep1_peak_1424
chr11	77583478	77584068	591	77583939	148.36	104.958	11.4892	101.359	WT_rep1_peak_1425
chr11	77600392	77600952	561	77600528	223.2	194.816	17.3527	190.965	WT_rep1_peak_1426
chr11	77668033	77668496	464	77668146	191.69	18.2454	2.02827	15.1708	WT_rep1_peak_1427
chr11	77668800	77669157	358	77668912	267.83	95.0357	4.8879	91.4732	WT_rep1_peak_1428
chr11	77844532	77844848	317	77844741	293.44	101.149	4.74897	97.5636	WT_rep1_peak_1429
chr11	77903853	77904002	150	77903967	106.35	15.1228	2.38547	12.0864	WT_rep1_peak_1430
chr11	77913858	77914446	589	77913968	138.51	94.519	10.7982	90.9579	WT_rep1_peak_1431
chr11	77920342	77920637	296	77920489	96.5	52.4575	7.49994	49.0951	WT_rep1_peak_1432
chr11	78044720	78045241	522	78045097	99.12	42.0164	5.53177	38.7229	WT_rep1_peak_1433
chr11	78045558	78046080	523	78045700	137.86	70.0834	7.13912	66.6259	WT_rep1_peak_1434
chr11	78050616	78050978	363	78050857	86.65	43.8016	6.78426	40.4925	WT_rep1_peak_1435
chr11	78071041	78071196	156	78071171	43.98	12.1128	3.48164	9.12036	WT_rep1_peak_1436
chr11	78145697	78145864	168	78145744	59.08	22.4265	4.65026	19.2986	WT_rep1_peak_1437
chr11	78162666	78163082	417	78162777	513.35	371.058	12.8587	366.903	WT_rep1_peak_1438
chr11	78180563	78181047	485	78180899	360.39	214.311	9.26653	210.417	WT_rep1_peak_1439
chr11	78458516	78458665	150	78458610	67.62	28.3025	5.31079	25.1155	WT_rep1_peak_1440
chr11	78641428	78641904	477	78641779	136.54	92.3881	10.6458	88.8353	WT_rep1_peak_1441
chr11	78906960	78907310	351	78907091	154.92	76.156	6.89928	72.6705	WT_rep1_peak_1442
chr11	78907532	78907978	447	78907669	183.15	128.425	11.5095	124.748	WT_rep1_peak_1443
chr11	79130963	79131205	243	79131205	42.67	6.39753	2.29841	3.53904	WT_rep1_peak_1444
chr11	79392425	79393818	1394	79393074	570.46	614.908	29.6094	610.481	WT_rep1_peak_1445
chr11	79417802	79418458	657	79418021	636.11	830.974	49.3119	826.364	WT_rep1_peak_1446
chr11	79469284	79469731	448	79469555	301.31	150.127	7.19795	146.387	WT_rep1_peak_1447
chr11	79583443	79583902	460	79583790	244.2	134.79	8.1734	131.094	WT_rep1_peak_1448
chr11	79825795	79826434	640	79826317	85.34	42.9376	6.68264	39.6335	WT_rep1_peak_1449
chr11	79826699	79826850	152	79826747	72.21	16.0724	3.05043	13.0234	WT_rep1_peak_1450
chr11	79922797	79923148	352	79923015	145.73	102.074	11.3571	98.4842	WT_rep1_peak_1451
chr11	80030727	80031033	307	80030842	47.92	14.4893	3.7865	11.4598	WT_rep1_peak_1452
chr11	80251887	80252230	344	80252145	47.92	14.4893	3.7865	11.4598	WT_rep1_peak_1453
chr11	80286341	80286659	319	80286428	284.9	253.582	18.5651	249.611	WT_rep1_peak_1454
chr11	80362826	80363134	309	80363030	69.58	29.8364	5.46321	26.6357	WT_rep1_peak_1455
chr11	80369220	80369920	701	80369437	531.73	471.12	19.0261	466.841	WT_rep1_peak_1456
chr11	80370697	80371589	893	80371328	1959.52	1821.48	21.7836	1816.28	WT_rep1_peak_1457
chr11	80771260	80771978	719	80771849	258.64	118.949	6.4911	115.302	WT_rep1_peak_1458
chr11	81043549	81043826	278	81043677	69.58	29.8364	5.46321	26.6357	WT_rep1_peak_1459
chr11	82335873	82336231	359	82336096	64.99	26.0491	5.10755	22.8824	WT_rep1_peak_1460
chr11	82655553	82656395	843	82656068	324.29	301.136	20.3306	297.084	WT_rep1_peak_1461
chr11	82674350	82674668	319	82674571	98.47	39.4293	5.23519	36.1534	WT_rep1_peak_1462
chr11	82692292	82692685	394	82692574	62.36	24.5796	4.90431	21.4301	WT_rep1_peak_1463
chr11	83671998	83672194	197	83672091	42.01	8.54503	2.68833	5.62697	WT_rep1_peak_1464
chr11	83852692	83852958	267	83852841	115.54	70.8129	9.01989	67.3519	WT_rep1_peak_1465
chr11	83899366	83900587	1222	83899512	217.29	150.806	11.4888	147.064	WT_rep1_peak_1466
chr11	83931673	83932323	651	83931819	295.41	291.168	22.9417	287.132	WT_rep1_peak_1467
chr11	83932524	83932959	436	83932818	135.23	64.2407	6.48715	60.8125	WT_rep1_peak_1468
chr11	83939576	83940016	441	83939916	137.86	61.0654	6.03721	57.6565	WT_rep1_peak_1469
chr11	83970094	83970399	306	83970238	67.62	28.3025	5.31079	25.1155	WT_rep1_peak_1470
chr11	84290729	84291053	325	84290941	192.34	124.343	10.1759	120.679	WT_rep1_peak_1471
chr11	84292248	84292401	154	84292316	49.89	15.7313	3.93893	12.6844	WT_rep1_peak_1472
chr11	84725319	84725477	159	84725378	57.11	21.0265	4.49783	17.9141	WT_rep1_peak_1473
chr11	84761967	84762116	150	84762054	61.71	23.8549	4.8535	20.7118	WT_rep1_peak_1474
chr11	84879217	84879655	439	84879339	246.83	224.637	19.1818	220.721	WT_rep1_peak_1475
chr11	85081490	85081990	501	85081691	211.38	127.589	9.23387	123.915	WT_rep1_peak_1476
chr11	85082261	85082804	544	85082403	76.81	35.3937	6.02212	32.1463	WT_rep1_peak_1477
chr11	85236481	85236980	500	85236710	99.78	55.4649	7.80046	52.084	WT_rep1_peak_1478
chr11	86098608	86098757	150	86098671	43.98	12.1128	3.48164	9.12036	WT_rep1_peak_1479
chr11	86161794	86161943	150	86161819	88.62	15.2049	2.63593	12.1681	WT_rep1_peak_1480
chr11	86189172	86189870	699	86189445	534.36	658.445	41.4364	653.979	WT_rep1_peak_1481
chr11	86210328	86210916	589	86210547	281.62	238.21	16.7231	234.268	WT_rep1_peak_1482
chr11	86392994	86393724	731	86393177	356.46	378.867	27.667	374.701	WT_rep1_peak_1483
chr11	86580370	86580939	570	86580495	116.85	41.4386	4.71397	38.1475	WT_rep1_peak_1484
chr11	86831373	86831540	168	86831508	58.42	21.7229	4.59945	18.6043	WT_rep1_peak_1485
chr11	86971182	86971427	246	86971301	85.34	42.9376	6.68264	39.6335	WT_rep1_peak_1486
chr11	86976038	86976267	230	86976153	51.2	17.0072	4.04055	13.9434	WT_rep1_peak_1487
chr11	87012716	87012952	237	87012850	65.65	26.7938	5.15836	23.6212	WT_rep1_peak_1488
chr11	87117789	87118279	491	87117930	82.06	10.8173	2.24479	7.85467	WT_rep1_peak_1489
chr11	87122071	87122758	688	87122298	2701.98	2804.47	28.3034	2798.91	WT_rep1_peak_1490
chr11	87501735	87502320	586	87501977	310.5	312.267	24.1103	308.196	WT_rep1_peak_1491
chr11	87505098	87505331	234	87505160	42.67	10.9528	3.24682	7.9888	WT_rep1_peak_1492
chr11	87505587	87505843	257	87505708	110.28	48.6523	5.85709	45.3122	WT_rep1_peak_1493
chr11	87941722	87942166	445	87942031	262.58	214.076	15.5049	210.184	WT_rep1_peak_1494
chr11	87964096	87964289	194	87964206	78.77	37.0328	6.17455	33.7726	WT_rep1_peak_1495
chr11	88083433	88083744	312	88083646	195.62	136.61	11.5661	132.908	WT_rep1_peak_1496
chr11	88084247	88084617	371	88084322	78.77	37.0328	6.17455	33.7726	WT_rep1_peak_1497
chr11	88101664	88101921	258	88101808	66.3	27.5449	5.20917	24.3638	WT_rep1_peak_1498
chr11	88735839	88736219	381	88736071	132.6	42.6343	4.30982	39.3352	WT_rep1_peak_1499
chr11	88930627	88931718	1092	88931158	1078.56	1513.64	63.5035	1508.6	WT_rep1_peak_1500
chr11	89926355	89926812	458	89926582	236.32	211.552	18.3688	207.664	WT_rep1_peak_1501
chr11	90228973	90229242	270	90229107	68.93	25.1341	4.66186	21.9818	WT_rep1_peak_1502
chr11	90230023	90230258	236	90230118	73.52	30.6512	5.32308	27.4425	WT_rep1_peak_1503
chr11	90231529	90231878	350	90231621	74.18	29.427	5.01198	26.2302	WT_rep1_peak_1504
chr11	90278829	90279041	213	90278948	49.23	15.7313	3.88812	12.6844	WT_rep1_peak_1505
chr11	92990623	92991023	401	92990748	74.84	12.1027	2.52787	9.11782	WT_rep1_peak_1506
chr11	93491740	93491892	153	93491850	59.74	22.4265	4.70107	19.2986	WT_rep1_peak_1507
chr11	94016308	94016528	221	94016427	288.18	193.218	11.0376	189.371	WT_rep1_peak_1508
chr11	94104372	94105212	841	94104732	261.93	228.74	17.7653	224.816	WT_rep1_peak_1509
chr11	94178903	94179353	451	94179026	91.25	48.1948	7.13993	44.8565	WT_rep1_peak_1510
chr11	94184070	94184223	154	94184111	202.85	41.8545	3.08856	38.5618	WT_rep1_peak_1511
chr11	94186800	94187033	234	94186895	652.52	319.252	7.18152	315.171	WT_rep1_peak_1512
chr11	94187715	94188123	409	94187976	1650.33	907.798	8.51202	903.131	WT_rep1_peak_1513
chr11	94230324	94231274	951	94230820	900.66	794.594	19.1842	790.011	WT_rep1_peak_1514
chr11	94299997	94300400	404	94300214	150.33	77.105	7.20613	73.6159	WT_rep1_peak_1515
chr11	94364452	94364603	152	94364472	89.93	14.9033	2.59813	11.8712	WT_rep1_peak_1516
chr11	94550538	94550904	367	94550778	63.02	25.311	4.95512	22.1528	WT_rep1_peak_1517
chr11	94554743	94554959	217	94554856	68.27	29.0663	5.3616	25.8712	WT_rep1_peak_1518
chr11	94555215	94555525	311	94555352	99.78	55.4649	7.80046	52.084	WT_rep1_peak_1519
chr11	94883233	94883706	474	94883509	15681.4	19388.3	45.6814	19380.7	WT_rep1_peak_1520
chr11	94887214	94887442	229	94887356	1106.79	699.13	10.4508	694.629	WT_rep1_peak_1521
chr11	94897381	94897672	292	94897572	254.05	39.1144	2.57625	35.8401	WT_rep1_peak_1522
chr11	94935603	94935857	255	94935714	51.86	17.0072	4.09136	13.9434	WT_rep1_peak_1523
chr11	95282346	95282575	230	95282457	115.54	39.1228	4.48217	35.8484	WT_rep1_peak_1524
chr11	95382517	95383633	1117	95382937	2164.99	2887.9	56.0413	2882.31	WT_rep1_peak_1525
chr11	95401567	95401716	150	95401612	70.9	13.3497	2.76528	10.3377	WT_rep1_peak_1526
chr11	95570938	95571573	636	95571077	188.4	151.44	14.6598	147.696	WT_rep1_peak_1527
chr11	95640226	95640915	690	95640499	224.51	54.3602	3.46936	50.9872	WT_rep1_peak_1528
chr11	95654634	95655340	707	95655059	660.4	850.388	47.5824	845.763	WT_rep1_peak_1529
chr11	95721963	95722112	150	95722038	47.92	14.4893	3.7865	11.4598	WT_rep1_peak_1530
chr11	95722283	95722530	248	95722394	84.68	42.0786	6.63183	38.7814	WT_rep1_peak_1531
chr11	96709683	96710796	1114	96709778	2486	1876.13	14.2931	1870.92	WT_rep1_peak_1532
chr11	96718385	96719114	730	96718879	629.54	393.468	10.17	389.282	WT_rep1_peak_1533
chr11	96854957	96855225	269	96855091	70.24	30.6126	5.51402	27.4041	WT_rep1_peak_1534
chr11	97079539	97079806	268	97079663	49.89	15.7313	3.93893	12.6844	WT_rep1_peak_1535
chr11	97097587	97097760	174	97097727	227.13	132.245	8.77439	128.556	WT_rep1_peak_1536
chr11	97219415	97219885	471	97219742	183.81	123.699	10.8711	120.037	WT_rep1_peak_1537
chr11	97342392	97343151	760	97342597	97.81	35.0616	4.70534	31.8197	WT_rep1_peak_1538
chr11	97402606	97403154	549	97402752	841.58	884.827	28.4175	880.178	WT_rep1_peak_1539
chr11	97410599	97410855	257	97410712	133.92	89.2154	10.4426	85.6743	WT_rep1_peak_1540
chr11	97518257	97519227	971	97518923	319.04	325.078	24.7708	320.987	WT_rep1_peak_1541
chr11	97607818	97609422	1605	97607977	1825.61	1338.58	13.5304	1333.62	WT_rep1_peak_1542
chr11	97637724	97638038	315	97637897	382.06	417.671	29.6486	413.454	WT_rep1_peak_1543
chr11	97733067	97733219	153	97733192	169.37	25.9909	2.54277	22.8291	WT_rep1_peak_1544
chr11	97893876	97894034	159	97893969	299.34	135.804	6.40393	132.105	WT_rep1_peak_1545
chr11	97980275	97980424	150	97980416	61.71	10.8644	2.61279	7.90143	WT_rep1_peak_1546
chr11	98045954	98046964	1011	98046380	480.53	523.757	30.0954	519.423	WT_rep1_peak_1547
chr11	98048404	98048894	491	98048755	149.02	37.3687	3.48874	34.1072	WT_rep1_peak_1548
chr11	98094412	98094737	326	98094554	291.47	112.214	5.31758	108.589	WT_rep1_peak_1549
chr11	98101236	98101932	697	98101669	305.91	294.139	21.9221	290.099	WT_rep1_peak_1550
chr11	98140626	98140848	223	98140743	40.04	10.4305	3.17678	7.47053	WT_rep1_peak_1551
chr11	98141029	98141210	182	98141083	94.53	50.8873	7.39398	47.5337	WT_rep1_peak_1552
chr11	98217009	98217785	777	98217337	472.65	351.869	13.5328	347.739	WT_rep1_peak_1553
chr11	98218069	98219069	1001	98218970	355.8	77.2386	3.24363	73.749	WT_rep1_peak_1554
chr11	98271492	98271762	271	98271627	37.42	8.84045	2.97355	5.9153	WT_rep1_peak_1555
chr11	98655831	98655985	155	98655894	226.48	50.834	3.27919	47.482	WT_rep1_peak_1556
chr11	98687101	98687252	152	98687242	236.98	27.8016	2.2451	24.6192	WT_rep1_peak_1557
chr11	98689848	98690172	325	98690041	397.81	35.6672	2.01421	32.4189	WT_rep1_peak_1558
chr11	98690691	98691613	923	98690962	2519.48	3844.52	86.9132	3838.69	WT_rep1_peak_1559
chr11	98783060	98783504	445	98783333	263.9	156.322	9.13433	152.564	WT_rep1_peak_1560
chr11	98786874	98787026	153	98786919	76.15	35.3937	5.97131	32.1463	WT_rep1_peak_1561
chr11	98864309	98864746	438	98864340	43.33	12.1128	3.43083	9.12036	WT_rep1_peak_1562
chr11	99104061	99104228	168	99104099	179.21	45.063	3.53358	41.7457	WT_rep1_peak_1563
chr11	99313515	99313665	151	99313656	65.65	26.7938	5.15836	23.6212	WT_rep1_peak_1564
chr11	99314503	99315446	944	99315213	106.35	62.0534	8.30855	58.6372	WT_rep1_peak_1565
chr11	100353457	100355197	1741	100354834	1116.63	1074.65	23.3083	1069.86	WT_rep1_peak_1566
chr11	100595784	100596116	333	100595926	56.46	20.3375	4.44702	17.2345	WT_rep1_peak_1567
chr11	100913914	100914071	158	100913996	74.18	24.3845	4.17665	21.2384	WT_rep1_peak_1568
chr11	100988816	100989221	406	100989089	147.05	71.7734	6.72938	68.3095	WT_rep1_peak_1569
chr11	101169059	101169217	159	101169089	153.61	27.968	2.81111	24.785	WT_rep1_peak_1570
chr11	101216232	101216428	197	101216298	47.92	14.4893	3.7865	11.4598	WT_rep1_peak_1571
chr11	101324292	101324834	543	101324605	64.99	26.0491	5.10755	22.8824	WT_rep1_peak_1572
chr11	101325020	101325211	192	101325066	61.05	23.7088	4.77311	20.5716	WT_rep1_peak_1573
chr11	101325606	101326400	795	101326253	156.89	114.237	12.2209	110.605	WT_rep1_peak_1574
chr11	101471589	101471770	182	101471679	200.88	128.379	10.0938	124.702	WT_rep1_peak_1575
chr11	101557638	101558058	421	101557913	107.66	63.011	8.41017	59.5891	WT_rep1_peak_1576
chr11	101628917	101629255	339	101629116	109.63	24.3462	3.16081	21.2004	WT_rep1_peak_1577
chr11	101657649	101658120	472	101657885	97.81	53.6206	7.64803	50.2501	WT_rep1_peak_1578
chr11	101864020	101864799	780	101864459	2909.42	3078.87	29.6981	3073.21	WT_rep1_peak_1579
chr11	102181959	102182566	608	102182368	938.08	1133.52	40.7409	1128.69	WT_rep1_peak_1580
chr11	102196843	102197291	449	102197215	124.07	41.9758	4.4668	38.6824	WT_rep1_peak_1581
chr11	102328197	102328951	755	102328444	508.1	360.304	12.417	356.162	WT_rep1_peak_1582
chr11	102329267	102329417	151	102329284	55.8	9.02167	2.46951	6.09482	WT_rep1_peak_1583
chr11	102368915	102369172	258	102368973	49.23	15.6198	3.86417	12.5797	WT_rep1_peak_1584
chr11	102369544	102370295	752	102370064	75.49	31.1496	5.27535	27.9388	WT_rep1_peak_1585
chr11	102371473	102371633	161	102371559	259.3	136.043	7.6559	132.342	WT_rep1_peak_1586
chr11	102371877	102372694	818	102372102	1092.34	781.655	12.8629	777.083	WT_rep1_peak_1587
chr11	102577081	102577353	273	102577231	122.76	32.505	3.63992	29.2823	WT_rep1_peak_1588
chr11	102729339	102729577	239	102729466	124.73	57.6113	6.28634	54.2191	WT_rep1_peak_1589
chr11	102956561	102957542	982	102956752	101.09	46.0382	6.00555	42.7155	WT_rep1_peak_1590
chr11	102958213	102958485	273	102958346	145.08	72.7421	6.95605	69.273	WT_rep1_peak_1591
chr11	102959448	102959636	189	102959584	73.52	11.6865	2.48411	8.70508	WT_rep1_peak_1592
chr11	103007454	103007877	424	103007600	1084.47	520.14	7.04849	515.809	WT_rep1_peak_1593
chr11	103008029	103009069	1041	103008793	1433.7	1742.46	42.1971	1737.3	WT_rep1_peak_1594
chr11	103285798	103286020	223	103285909	92.56	49.0877	7.24155	45.7448	WT_rep1_peak_1595
chr11	103540811	103541299	489	103541158	724.73	457.468	10.3675	453.204	WT_rep1_peak_1596
chr11	103569769	103570089	321	103569829	68.93	25.4799	4.72486	22.3208	WT_rep1_peak_1597
chr11	104218883	104219188	306	104218944	450.99	212.403	6.80702	208.513	WT_rep1_peak_1598
chr11	104220748	104221603	856	104221237	1540.7	1245.36	16.2285	1240.46	WT_rep1_peak_1599
chr11	104314710	104316034	1325	104315118	322.98	131.423	5.6838	127.735	WT_rep1_peak_1600
chr11	104395885	104396597	713	104396245	433.26	480.086	31.0187	475.797	WT_rep1_peak_1601
chr11	105070702	105071211	510	105071095	100.44	56.3935	7.85126	53.008	WT_rep1_peak_1602
chr11	105172037	105172576	540	105172299	261.93	244.591	20.3504	240.636	WT_rep1_peak_1603
chr11	105704589	105704738	150	105704662	45.95	13.2827	3.63407	10.2711	WT_rep1_peak_1604
chr11	105757978	105758497	520	105758361	173.96	133.682	13.5419	129.989	WT_rep1_peak_1605
chr11	105777086	105777235	150	105777180	61.71	10.142	2.50828	7.19304	WT_rep1_peak_1606
chr11	105812502	105813065	564	105812671	131.29	22.7774	2.69982	19.6477	WT_rep1_peak_1607
chr11	105813696	105814810	1115	105814111	543.55	394.094	12.9654	389.907	WT_rep1_peak_1608
chr11	105818496	105818937	442	105818643	78.77	37.0328	6.17455	33.7726	WT_rep1_peak_1609
chr11	105819113	105819263	151	105819138	74.18	33.7769	5.81888	30.5425	WT_rep1_peak_1610
chr11	105949399	105949629	231	105949530	63.02	13.4336	2.90999	10.421	WT_rep1_peak_1611
chr11	105964033	105964399	367	105964270	61.71	23.8549	4.8535	20.7118	WT_rep1_peak_1612
chr11	106045047	106045325	279	106045195	62.36	24.5796	4.90431	21.4301	WT_rep1_peak_1613
chr11	106054613	106054814	202	106054676	99.78	55.4649	7.80046	52.084	WT_rep1_peak_1614
chr11	106138462	106139185	724	106138766	1234.14	909.364	13.573	904.696	WT_rep1_peak_1615
chr11	106140195	106140446	252	106140338	202.85	126.345	9.70691	122.674	WT_rep1_peak_1616
chr11	106457869	106458353	485	106458183	307.22	142.133	6.55791	138.414	WT_rep1_peak_1617
chr11	106672809	106673219	411	106673083	756.24	67.4679	2.0247	64.0245	WT_rep1_peak_1618
chr11	106925909	106926556	648	106926470	151.64	108.666	11.8144	105.053	WT_rep1_peak_1619
chr11	106963677	106964768	1092	106963819	178.56	100.426	8.27448	96.8427	WT_rep1_peak_1620
chr11	106965573	106965918	346	106965601	78.77	16.2909	2.95462	13.2406	WT_rep1_peak_1621
chr11	106986698	106986875	178	106986734	102.41	29.4207	3.8299	26.224	WT_rep1_peak_1622
chr11	106990469	106990759	291	106990614	300.66	149.259	7.18232	145.522	WT_rep1_peak_1623
chr11	107001660	107002533	874	107002248	183.15	145.461	14.2533	141.734	WT_rep1_peak_1624
chr11	107102691	107103407	717	107102962	128.01	83.9924	9.98527	80.4728	WT_rep1_peak_1625
chr11	107388425	107388574	150	107388439	47.92	12.0151	3.26142	9.03132	WT_rep1_peak_1626
chr11	107563352	107563792	441	107563678	179.87	140.721	13.9992	137.006	WT_rep1_peak_1627
chr11	107624428	107624859	432	107624725	417.51	295.384	12.309	291.341	WT_rep1_peak_1628
chr11	107768060	107768209	150	107768180	40.7	10.4305	3.22759	7.47053	WT_rep1_peak_1629
chr11	107827228	107827899	672	107827363	104.38	38.2255	4.78985	34.9585	WT_rep1_peak_1630
chr11	107828116	107828567	452	107828327	84.68	20.3339	3.2955	17.2338	WT_rep1_peak_1631
chr11	107829479	107830000	522	107829746	70.24	22.3266	4.03631	19.2044	WT_rep1_peak_1632
chr11	108814356	108814625	270	108814496	175.93	136.019	13.6944	132.318	WT_rep1_peak_1633
chr11	108840205	108840578	374	108840432	63.68	25.311	5.00593	22.1528	WT_rep1_peak_1634
chr11	109286700	109287392	693	109287082	330.2	340.885	25.6346	336.77	WT_rep1_peak_1635
chr11	109380823	109381152	330	109380966	59.08	22.4265	4.65026	19.2986	WT_rep1_peak_1636
chr11	109823722	109823871	150	109823728	54.49	13.6808	3.26388	10.6669	WT_rep1_peak_1637
chr11	110403605	110403761	157	110403621	53.17	18.3158	4.19298	15.2352	WT_rep1_peak_1638
chr11	110915870	110916513	644	110916145	107	63.011	8.35936	59.5891	WT_rep1_peak_1639
chr11	110917030	110917179	150	110917083	45.95	13.2827	3.63407	10.2711	WT_rep1_peak_1640
chr11	110963193	110964099	907	110963646	239.61	215.458	18.6229	211.562	WT_rep1_peak_1641
chr11	112676177	112676810	634	112676516	233.04	177.462	13.4895	173.652	WT_rep1_peak_1642
chr11	112676994	112677161	168	112677120	105.69	51.8426	6.6681	48.4822	WT_rep1_peak_1643
chr11	112934838	112935993	1156	112935875	119.48	74.8043	9.32474	71.3248	WT_rep1_peak_1644
chr11	113546894	113547047	154	113547017	68.93	21.4863	4.03043	18.3716	WT_rep1_peak_1645
chr11	113552623	113552772	150	113552684	47.92	14.4893	3.7865	11.4598	WT_rep1_peak_1646
chr11	113553885	113554202	318	113554017	87.97	44.6706	6.88588	41.3547	WT_rep1_peak_1647
chr11	113579389	113579692	304	113579628	63.02	25.311	4.95512	22.1528	WT_rep1_peak_1648
chr11	113618396	113618635	240	113618421	42.01	11.5422	3.32921	8.56181	WT_rep1_peak_1649
chr11	113618925	113619818	894	113619173	82.71	40.3758	6.47941	37.0906	WT_rep1_peak_1650
chr11	113671423	113671676	254	113671555	85.34	42.9376	6.68264	39.6335	WT_rep1_peak_1651
chr11	114682158	114682535	378	114682200	65.65	26.7938	5.15836	23.6212	WT_rep1_peak_1652
chr11	115071270	115071425	156	115071314	68.27	29.0663	5.3616	25.8712	WT_rep1_peak_1653
chr11	115135917	115136377	461	115136124	97.16	53.6206	7.59722	50.2501	WT_rep1_peak_1654
chr11	115140341	115140572	232	115140442	61.71	23.8549	4.8535	20.7118	WT_rep1_peak_1655
chr11	115284403	115285028	626	115284615	140.48	96.6624	10.9506	93.0931	WT_rep1_peak_1656
chr11	115301317	115301734	418	115301598	105.03	61.0998	8.20693	57.688	WT_rep1_peak_1657
chr11	115321313	115322087	775	115321945	194.31	158.69	15.117	154.926	WT_rep1_peak_1658
chr11	115426053	115426204	152	115426173	79.43	37.8606	6.22536	34.5951	WT_rep1_peak_1659
chr11	115475930	115476117	188	115476040	105.03	61.0998	8.20693	57.688	WT_rep1_peak_1660
chr11	115497659	115498340	682	115498043	101.09	53.948	7.29245	50.5763	WT_rep1_peak_1661
chr11	115498952	115499182	231	115499035	45.3	13.2827	3.58326	10.2711	WT_rep1_peak_1662
chr11	115506076	115506237	162	115506125	311.82	164.79	7.82043	161.012	WT_rep1_peak_1663
chr11	115536622	115536773	152	115536722	347.27	188.299	8.0992	184.464	WT_rep1_peak_1664
chr11	115691802	115691964	163	115691822	49.23	15.7313	3.88812	12.6844	WT_rep1_peak_1665
chr11	115855123	115855610	488	115855496	154.27	112	12.0176	108.375	WT_rep1_peak_1666
chr11	116058429	116058951	523	116058703	311.16	313.685	24.1611	309.612	WT_rep1_peak_1667
chr11	116228824	116229543	720	116229093	1885.34	2437.73	50.7764	2432.31	WT_rep1_peak_1668
chr11	116428785	116429000	216	116428862	59.74	16.4904	3.5728	13.4358	WT_rep1_peak_1669
chr11	116429890	116430337	448	116430136	1358.21	1242.98	20.9109	1238.08	WT_rep1_peak_1670
chr11	116877489	116877652	164	116877609	53.17	18.3158	4.19298	15.2352	WT_rep1_peak_1671
chr11	117047783	117048333	551	117047831	201.53	77.4631	5.24016	73.9731	WT_rep1_peak_1672
chr11	117591415	117591565	151	117591523	293.44	64.0263	3.23556	60.5989	WT_rep1_peak_1673
chr11	117611638	117614377	2740	117613727	1073.31	1450.43	56.5425	1445.42	WT_rep1_peak_1674
chr11	117651613	117651961	349	117651761	57.77	21.0265	4.54864	17.9141	WT_rep1_peak_1675
chr11	117652741	117652975	235	117652868	196.94	160.586	15.2259	156.818	WT_rep1_peak_1676
chr11	117653217	117653600	384	117653302	132.6	69.8468	7.42246	66.3899	WT_rep1_peak_1677
chr11	118155679	118155858	180	118155736	77.46	36.2105	6.07293	32.9577	WT_rep1_peak_1678
chr11	118298198	118298859	662	118298525	93.87	49.9852	7.34317	46.636	WT_rep1_peak_1679
chr11	118301755	118302081	327	118301840	65.65	26.7938	5.15836	23.6212	WT_rep1_peak_1680
chr11	118381934	118382132	199	118382029	356.46	175.751	7.14912	171.947	WT_rep1_peak_1681
chr11	118529768	118530086	319	118529872	60.39	15.8929	3.41078	12.8453	WT_rep1_peak_1682
chr11	118929478	118929757	280	118929616	164.77	123.293	12.8306	119.632	WT_rep1_peak_1683
chr11	118971394	118972767	1374	118972677	289.5	145.247	7.26244	141.52	WT_rep1_peak_1684
chr11	119161035	119161344	310	119161228	227.13	80.8537	4.84876	77.3488	WT_rep1_peak_1685
chr11	119398280	119398611	332	119398347	71.55	31.3948	5.61564	28.181	WT_rep1_peak_1686
chr11	119433071	119433256	186	119433124	243.55	34.857	2.47892	31.616	WT_rep1_peak_1687
chr11	119789458	119789615	158	119789510	66.96	23.7518	4.53057	20.6142	WT_rep1_peak_1688
chr11	119790005	119790202	198	119790076	109.63	64.9382	8.5626	61.5066	WT_rep1_peak_1689
chr11	119892155	119892757	603	119892320	739.83	574.193	14.8165	569.806	WT_rep1_peak_1690
chr11	119901370	119901646	277	119901503	233.04	78.9701	4.62077	75.4726	WT_rep1_peak_1691
chr11	119902323	119902924	602	119902696	1124.51	1020.38	20.4638	1015.63	WT_rep1_peak_1692
chr11	119995679	119995885	207	119995740	73.52	26.9067	4.6577	23.7336	WT_rep1_peak_1693
chr11	119996097	119996574	478	119996445	120.13	20.9662	2.69181	17.8594	WT_rep1_peak_1694
chr11	120167102	120167321	220	120167246	72.21	32.183	5.66645	28.9616	WT_rep1_peak_1695
chr11	120178081	120178243	163	120178147	51.2	17.0072	4.04055	13.9434	WT_rep1_peak_1696
chr11	120267667	120267816	150	120267782	47.26	14.4893	3.73569	11.4598	WT_rep1_peak_1697
chr11	120273155	120273304	150	120273170	76.81	9.75852	2.22301	6.81683	WT_rep1_peak_1698
chr11	120356029	120356446	418	120356303	72.21	32.183	5.66645	28.9616	WT_rep1_peak_1699
chr11	120379127	120379565	439	120379424	181.18	143.086	14.1008	139.365	WT_rep1_peak_1700
chr11	120500924	120501411	488	120501045	228.45	153.239	10.9261	149.49	WT_rep1_peak_1701
chr11	120520140	120520289	150	120520162	104.38	19.2564	2.77307	16.1678	WT_rep1_peak_1702
chr11	120525044	120525193	150	120525057	38.07	9.35981	3.02436	6.42127	WT_rep1_peak_1703
chr11	120697921	120698081	161	120698055	134.57	77.0894	8.3174	73.6004	WT_rep1_peak_1704
chr11	120854326	120854778	453	120854455	423.41	439.411	26.5259	435.168	WT_rep1_peak_1705
chr11	121113264	121113734	471	121113328	131.95	87.1164	10.2901	83.5837	WT_rep1_peak_1706
chr11	121114073	121114311	239	121114192	56.46	20.3375	4.44702	17.2345	WT_rep1_peak_1707
chr11	121197550	121198360	811	121197950	1095.63	1258.66	35.8961	1253.75	WT_rep1_peak_1708
chr11	121247531	121247697	167	121247675	73.52	26.9067	4.6577	23.7336	WT_rep1_peak_1709
chr11	121606667	121606829	163	121606726	99.12	55.4649	7.74965	52.084	WT_rep1_peak_1710
chr12	3416916	3417078	163	3417057	235.67	27.9964	2.25398	24.8131	WT_rep1_peak_1711
chr12	3453431	3453732	302	3453461	90.59	14.4403	2.52665	11.4174	WT_rep1_peak_1712
chr12	3550092	3550486	395	3550381	83.37	38.523	6.02643	35.2549	WT_rep1_peak_1713
chr12	3550943	3552428	1486	3551509	206.78	173.427	16.0824	169.627	WT_rep1_peak_1714
chr12	3957603	3957892	290	3957748	840.26	1196.4	65.1137	1191.53	WT_rep1_peak_1715
chr12	4012891	4013087	197	4013019	55.8	13.6914	3.24565	10.6773	WT_rep1_peak_1716
chr12	4016016	4016402	387	4016245	163.46	122.152	12.729	118.494	WT_rep1_peak_1717
chr12	4169887	4170292	406	4169944	41.36	10.9813	3.2784	8.01331	WT_rep1_peak_1718
chr12	4184661	4184832	172	4184736	55.14	19.6559	4.3454	16.5595	WT_rep1_peak_1719
chr12	4297597	4298382	786	4298029	393.22	349.268	18.7723	345.142	WT_rep1_peak_1720
chr12	4298821	4299777	957	4299559	259.96	159.936	9.66507	156.17	WT_rep1_peak_1721
chr12	4344996	4345789	794	4345101	313.13	144.618	6.54437	140.893	WT_rep1_peak_1722
chr12	4642453	4642609	157	4642492	54.49	18.982	4.29459	15.8951	WT_rep1_peak_1723
chr12	4684520	4684694	175	4684635	238.29	65.9001	3.85958	62.4655	WT_rep1_peak_1724
chr12	4794871	4795258	388	4794933	51.86	17.0072	4.09136	13.9434	WT_rep1_peak_1725
chr12	4900846	4901053	208	4900959	87.31	44.6706	6.83507	41.3547	WT_rep1_peak_1726
chr12	4901578	4901728	151	4901617	36.76	8.33208	2.92274	5.41642	WT_rep1_peak_1727
chr12	4930538	4930687	150	4930673	57.77	9.86492	2.55514	6.92225	WT_rep1_peak_1728
chr12	5081415	5081791	377	5081721	142.45	70.1597	6.83101	66.7018	WT_rep1_peak_1729
chr12	5094078	5094275	198	5094153	60.39	23.1372	4.75188	20.0029	WT_rep1_peak_1730
chr12	5130843	5131188	346	5130920	66.96	27.5449	5.25998	24.3638	WT_rep1_peak_1731
chr12	8334136	8334441	306	8334228	59.08	22.4265	4.65026	19.2986	WT_rep1_peak_1732
chr12	8334811	8335129	319	8334836	42.01	11.5422	3.32921	8.56181	WT_rep1_peak_1733
chr12	8392106	8392320	215	8392232	84.03	42.0786	6.58103	38.7814	WT_rep1_peak_1734
chr12	8547970	8548567	598	8548309	1469.81	1877.02	48.6217	1871.8	WT_rep1_peak_1735
chr12	8548949	8549468	520	8549087	524.51	236.424	6.45588	232.486	WT_rep1_peak_1736
chr12	9630774	9630927	154	9630822	57.11	21.0265	4.49783	17.9141	WT_rep1_peak_1737
chr12	10444540	10445316	777	10445042	228.45	148.818	10.4294	145.082	WT_rep1_peak_1738
chr12	11141054	11141275	222	11141196	55.8	19.6559	4.39621	16.5595	WT_rep1_peak_1739
chr12	11142238	11142592	355	11142346	66.3	27.5449	5.20917	24.3638	WT_rep1_peak_1740
chr12	11376204	11376574	371	11376294	1263.68	746.036	9.42384	741.496	WT_rep1_peak_1741
chr12	12422814	12423260	447	12422943	257.99	186.567	12.5418	182.736	WT_rep1_peak_1742
chr12	12987005	12987193	189	12987120	103.06	55.7512	7.43312	52.3694	WT_rep1_peak_1743
chr12	14199080	14200269	1190	14199621	309.19	203.274	10.7333	199.405	WT_rep1_peak_1744
chr12	14200522	14200812	291	14200601	109.63	29.8007	3.68761	26.6022	WT_rep1_peak_1745
chr12	15843211	15844116	906	15843596	587.53	658.679	32.696	654.212	WT_rep1_peak_1746
chr12	16709803	16710166	364	16709949	365.65	128.864	4.88862	125.186	WT_rep1_peak_1747
chr12	17034534	17035134	601	17034833	1075.93	1612.85	78.3224	1607.76	WT_rep1_peak_1748
chr12	17224386	17225208	823	17224762	187.09	138.276	12.5813	134.569	WT_rep1_peak_1749
chr12	17841308	17841625	318	17841412	98.47	41.4578	5.52603	38.1667	WT_rep1_peak_1750
chr12	20950671	20950904	234	20950807	72.21	32.183	5.66645	28.9616	WT_rep1_peak_1751
chr12	21605439	21605914	476	21605786	73.52	32.9771	5.76807	29.7501	WT_rep1_peak_1752
chr12	21606135	21606421	287	21606296	58.42	21.7229	4.59945	18.6043	WT_rep1_peak_1753
chr12	21610896	21611178	283	21610998	39.39	9.88991	3.12597	6.94304	WT_rep1_peak_1754
chr12	21614385	21614535	151	21614442	41.36	10.9813	3.2784	8.01331	WT_rep1_peak_1755
chr12	24715950	24716156	207	24716068	70.24	30.6126	5.51402	27.4041	WT_rep1_peak_1756
chr12	25008956	25009447	492	25009161	230.42	203.788	17.9116	199.917	WT_rep1_peak_1757
chr12	25107302	25108102	801	25107691	1821.67	1387.22	14.5059	1382.24	WT_rep1_peak_1758
chr12	25144205	25144631	427	25144322	224.51	158.445	11.8689	154.683	WT_rep1_peak_1759
chr12	26528202	26528665	464	26528538	110.94	65.9077	8.66422	62.4706	WT_rep1_peak_1760
chr12	27190817	27190980	164	27190954	166.08	125.584	12.9322	121.915	WT_rep1_peak_1761
chr12	27191145	27192061	917	27191301	389.94	427.152	30.072	422.923	WT_rep1_peak_1762
chr12	27391127	27391435	309	27391244	151.64	98.9447	10.1761	95.367	WT_rep1_peak_1763
chr12	28797071	28797336	266	28797202	129.98	64.7863	6.94846	61.3564	WT_rep1_peak_1764
chr12	29861436	29861698	263	29861582	2826.7	1605.3	8.94843	1600.22	WT_rep1_peak_1765
chr12	29876743	29877774	1032	29877188	5003.51	7399.95	79.4998	7393.53	WT_rep1_peak_1766
chr12	29971144	29971355	212	29971286	46.61	13.8815	3.68488	10.8628	WT_rep1_peak_1767
chr12	29971606	29971929	324	29971741	233.7	145.655	9.77911	141.927	WT_rep1_peak_1768
chr12	30052360	30052691	332	30052453	69.58	29.6671	5.42957	26.4693	WT_rep1_peak_1769
chr12	31381608	31382224	617	31381720	86.65	43.8016	6.78426	40.4925	WT_rep1_peak_1770
chr12	31537290	31537855	566	31537353	120.13	75.8112	9.37555	72.3266	WT_rep1_peak_1771
chr12	31538040	31538258	219	31538138	39.39	9.88991	3.12597	6.94304	WT_rep1_peak_1772
chr12	31758697	31760111	1415	31759328	991.25	1039.14	28.35	1034.38	WT_rep1_peak_1773
chr12	31761925	31762632	708	31762354	1609.63	1738.73	30.9737	1733.57	WT_rep1_peak_1774
chr12	31976556	31976748	193	31976618	84.03	42.0786	6.58103	38.7814	WT_rep1_peak_1775
chr12	32429555	32430266	712	32429996	311.16	298.951	21.7534	294.903	WT_rep1_peak_1776
chr12	32430444	32430634	191	32430556	92.56	49.0877	7.24155	45.7448	WT_rep1_peak_1777
chr12	33184757	33185355	599	33185153	350.55	369.041	27.0421	364.888	WT_rep1_peak_1778
chr12	33417163	33417451	289	33417240	45.95	13.2827	3.63407	10.2711	WT_rep1_peak_1779
chr12	33417606	33417802	197	33417683	128.01	83.9924	9.98527	80.4728	WT_rep1_peak_1780
chr12	33425143	33425476	334	33425281	79.43	37.8606	6.22536	34.5951	WT_rep1_peak_1781
chr12	33487622	33488104	483	33487911	391.9	431.284	30.4107	427.05	WT_rep1_peak_1782
chr12	33489532	33490160	629	33489988	57.11	21.0265	4.49783	17.9141	WT_rep1_peak_1783
chr12	35194104	35194578	475	35194244	179.21	140.721	13.9484	137.006	WT_rep1_peak_1784
chr12	38523911	38524060	150	38524002	42.67	11.5422	3.38002	8.56181	WT_rep1_peak_1785
chr12	40085725	40086716	992	40086293	833.7	1183.47	64.6056	1178.61	WT_rep1_peak_1786
chr12	40365318	40365467	150	40365430	45.95	13.2827	3.63407	10.2711	WT_rep1_peak_1787
chr12	40820410	40820932	523	40820552	82.71	22.5982	3.63972	19.4695	WT_rep1_peak_1788
chr12	40894264	40894459	196	40894408	381.4	66	2.79125	62.5621	WT_rep1_peak_1789
chr12	41501791	41504502	2712	41501925	351.2	371.497	27.2605	367.34	WT_rep1_peak_1790
chr12	44253715	44254324	610	44253862	376.81	407.585	29.062	403.382	WT_rep1_peak_1791
chr12	44329344	44329579	236	44329482	48.58	15.106	3.83731	12.0697	WT_rep1_peak_1792
chr12	44329748	44329942	195	44329892	66.96	15.9286	3.23612	12.8805	WT_rep1_peak_1793
chr12	44358033	44358349	317	44358157	111.6	49.447	5.92619	46.1027	WT_rep1_peak_1794
chr12	44369464	44369613	150	44369501	40.04	10.4305	3.17678	7.47053	WT_rep1_peak_1795
chr12	44645044	44645768	725	44645420	456.89	398.481	18.3158	394.289	WT_rep1_peak_1796
chr12	44646214	44646574	361	44646362	127.35	74.5594	8.50017	71.0818	WT_rep1_peak_1797
chr12	46745166	46745400	235	46745310	53.17	18.3158	4.19298	15.2352	WT_rep1_peak_1798
chr12	46746795	46747717	923	46746944	268.49	141.132	7.69974	137.416	WT_rep1_peak_1799
chr12	49431123	49431283	161	49431269	102.41	15.5023	2.46501	12.4632	WT_rep1_peak_1800
chr12	49432076	49433222	1147	49432712	1109.41	1105.67	25.2366	1100.86	WT_rep1_peak_1801
chr12	51656419	51656974	556	51656706	90.59	47.3066	7.08912	43.9746	WT_rep1_peak_1802
chr12	51795311	51795799	489	51795553	202.85	139.377	11.3247	135.667	WT_rep1_peak_1803
chr12	51876933	51877225	293	51877137	53.17	18.3158	4.19298	15.2352	WT_rep1_peak_1804
chr12	52562857	52564369	1513	52563137	630.2	725.536	35.0666	721.013	WT_rep1_peak_1805
chr12	52564706	52565167	462	52565023	124.73	72.7328	8.49505	69.2638	WT_rep1_peak_1806
chr12	52565575	52565731	157	52565589	75.49	31.1496	5.27535	27.9388	WT_rep1_peak_1807
chr12	52566038	52566722	685	52566444	1209.85	825.212	11.8711	820.606	WT_rep1_peak_1808
chr12	52589151	52589312	162	52589268	65.65	26.7938	5.15836	23.6212	WT_rep1_peak_1809
chr12	52613859	52614298	440	52614038	378.12	204.131	8.06637	200.26	WT_rep1_peak_1810
chr12	52933134	52933796	663	52933652	410.94	165.322	5.64304	161.543	WT_rep1_peak_1811
chr12	52934299	52934802	504	52934686	431.95	334.651	14.5285	330.545	WT_rep1_peak_1812
chr12	53186876	53187105	230	53186896	118.16	24.0431	2.96793	20.8992	WT_rep1_peak_1813
chr12	53187988	53188995	1008	53188626	374.84	175.269	6.71137	171.465	WT_rep1_peak_1814
chr12	53194679	53195036	358	53194795	159.52	61.2735	5.17803	57.8612	WT_rep1_peak_1815
chr12	54115500	54115834	335	54115630	53.83	18.3158	4.24378	15.2352	WT_rep1_peak_1816
chr12	55723633	55723970	338	55723893	393.87	65.9173	2.74218	62.48	WT_rep1_peak_1817
chr12	55915278	55915574	297	55915385	135.89	31.9056	3.3387	28.6895	WT_rep1_peak_1818
chr12	57285167	57286039	873	57285688	312.47	315.104	24.2628	311.029	WT_rep1_peak_1819
chr12	58260433	58260842	410	58260694	168.05	127.885	13.0846	124.209	WT_rep1_peak_1820
chr12	59090257	59090406	150	59090287	78.77	19.2175	3.32395	16.1293	WT_rep1_peak_1821
chr12	59118169	59118690	522	59118347	564.55	177.702	4.41838	173.892	WT_rep1_peak_1822
chr12	59119234	59119573	340	59119489	276.37	109.297	5.46001	105.683	WT_rep1_peak_1823
chr12	59248107	59248256	150	59248147	74.18	12.1027	2.50599	9.11782	WT_rep1_peak_1824
chr12	59251329	59251739	411	59251458	64.33	26.0491	5.05674	22.8824	WT_rep1_peak_1825
chr12	61570099	61570412	314	61570319	89.28	41.0281	6.01854	37.7404	WT_rep1_peak_1826
chr12	61570846	61571510	665	61571074	290.81	256.493	18.2382	252.517	WT_rep1_peak_1827
chr12	61651685	61651841	157	61651754	72.21	32.183	5.66645	28.9616	WT_rep1_peak_1828
chr12	61886307	61887481	1175	61886407	313.79	315.647	24.2143	311.571	WT_rep1_peak_1829
chr12	61890231	61890798	568	61890653	175.93	136.019	13.6944	132.318	WT_rep1_peak_1830
chr12	64967754	64967903	150	64967828	61.71	23.8549	4.8535	20.7118	WT_rep1_peak_1831
chr12	64990029	64990341	313	64990133	95.19	51.794	7.44479	48.4339	WT_rep1_peak_1832
chr12	65004026	65004339	314	65004192	89.93	46.4232	7.03831	43.0958	WT_rep1_peak_1833
chr12	65013664	65014750	1087	65014423	502.85	605.989	38.9975	601.569	WT_rep1_peak_1834
chr12	66516719	66516868	150	66516815	51.2	17.0072	4.04055	13.9434	WT_rep1_peak_1835
chr12	66517119	66517349	231	66517205	80.09	38.6937	6.27617	35.421	WT_rep1_peak_1836
chr12	66517834	66518357	524	66517981	401.1	446.515	31.1221	442.263	WT_rep1_peak_1837
chr12	66676862	66677082	221	66676962	65.65	26.7938	5.15836	23.6212	WT_rep1_peak_1838
chr12	66715406	66715575	170	66715496	42.67	11.5422	3.38002	8.56181	WT_rep1_peak_1839
chr12	67127235	67127392	158	67127256	59.74	22.4265	4.70107	19.2986	WT_rep1_peak_1840
chr12	67267830	67268951	1122	67267976	101.75	56.0993	7.72563	52.7163	WT_rep1_peak_1841
chr12	69229633	69229840	208	69229750	252.74	160.9	10.1494	157.132	WT_rep1_peak_1842
chr12	69231579	69232745	1167	69232198	140.48	91.8165	10.1058	88.2659	WT_rep1_peak_1843
chr12	69236868	69237017	150	69236897	52.52	17.6575	4.14217	14.587	WT_rep1_peak_1844
chr12	69244963	69245280	318	69245065	46.61	13.8815	3.68488	10.8628	WT_rep1_peak_1845
chr12	69363192	69363341	150	69363215	82.71	20.3163	3.34854	17.2163	WT_rep1_peak_1846
chr12	69363565	69363717	153	69363641	86	42.9376	6.73345	39.6335	WT_rep1_peak_1847
chr12	69364821	69364979	159	69364944	80.74	28.3793	4.54134	25.1918	WT_rep1_peak_1848
chr12	69368993	69369177	185	69369086	85.34	17.9214	2.97722	14.8493	WT_rep1_peak_1849
chr12	69419739	69420200	462	69420057	580.31	633.933	30.5952	629.488	WT_rep1_peak_1850
chr12	69631612	69632309	698	69632131	103.06	59.2048	8.0545	55.8037	WT_rep1_peak_1851
chr12	69663747	69664181	435	69664058	73.52	21.0172	3.72616	17.9101	WT_rep1_peak_1852
chr12	69790561	69790712	152	69790664	75.49	34.5825	5.9205	31.3426	WT_rep1_peak_1853
chr12	69793818	69794160	343	69793927	62.36	24.5796	4.90431	21.4301	WT_rep1_peak_1854
chr12	70005760	70006136	377	70005852	67.62	12.7792	2.7446	9.77851	WT_rep1_peak_1855
chr12	70022918	70023125	208	70023005	75.49	34.5825	5.9205	31.3426	WT_rep1_peak_1856
chr12	70031018	70031250	233	70031148	321.66	327.94	24.9741	323.844	WT_rep1_peak_1857
chr12	70060090	70060956	867	70060814	500.22	602.739	38.7943	598.322	WT_rep1_peak_1858
chr12	70090434	70091004	571	70090861	187.09	131.317	11.5393	127.631	WT_rep1_peak_1859
chr12	70091936	70092299	364	70092062	240.26	114.004	6.70176	110.373	WT_rep1_peak_1860
chr12	70314089	70314569	481	70314423	56.46	13.2996	3.12257	10.2878	WT_rep1_peak_1861
chr12	70946410	70946621	212	70946490	52.52	17.6575	4.14217	14.587	WT_rep1_peak_1862
chr12	71113882	71114079	198	71113961	189.72	70.0031	5.01884	66.5458	WT_rep1_peak_1863
chr12	71116532	71116740	209	71116608	95.84	37.2186	5.09698	33.9575	WT_rep1_peak_1864
chr12	71121688	71122811	1124	71121938	182.5	132.388	12.233	128.699	WT_rep1_peak_1865
chr12	71170189	71170338	150	71170208	68.93	14.0913	2.91367	11.0714	WT_rep1_peak_1866
chr12	71364229	71364530	302	71364457	116.19	71.8053	9.07069	68.339	WT_rep1_peak_1867
chr12	71365413	71365777	365	71365463	45.95	13.2827	3.63407	10.2711	WT_rep1_peak_1868
chr12	72036339	72036889	551	72036483	154.27	34.7617	3.23474	31.5211	WT_rep1_peak_1869
chr12	72116105	72116564	460	72116214	309.19	310.851	24.0087	306.782	WT_rep1_peak_1870
chr12	72258827	72259181	355	72258868	585.56	51.0761	2.00191	47.7216	WT_rep1_peak_1871
chr12	72321338	72321553	216	72321444	61.71	23.8549	4.8535	20.7118	WT_rep1_peak_1872
chr12	72355051	72355543	493	72355206	1179.65	967.447	16.6289	962.736	WT_rep1_peak_1873
chr12	72588143	72588526	384	72588382	261.27	244.591	20.2996	240.636	WT_rep1_peak_1874
chr12	72620420	72621034	615	72620926	151.64	108.666	11.8144	105.053	WT_rep1_peak_1875
chr12	72830342	72831203	862	72830802	896.06	579.848	10.808	575.455	WT_rep1_peak_1876
chr12	72840755	72840904	150	72840860	66.96	15.9286	3.23612	12.8805	WT_rep1_peak_1877
chr12	73331587	73331774	188	73331632	86	42.9376	6.73345	39.6335	WT_rep1_peak_1878
chr12	73988787	73989048	262	73988932	174.62	86.8734	7.0247	83.3434	WT_rep1_peak_1879
chr12	74208878	74209265	388	74208977	42.67	11.5422	3.38002	8.56181	WT_rep1_peak_1880
chr12	74313444	74313799	356	74313652	329.54	198.782	9.44404	194.922	WT_rep1_peak_1881
chr12	74342289	74342449	161	74342333	168.05	97.5854	8.55964	94.0138	WT_rep1_peak_1882
chr12	74944379	74944951	573	74944804	324.95	332.243	25.2281	328.141	WT_rep1_peak_1883
chr12	75500165	75500699	535	75500314	204.81	164.338	14.8068	160.561	WT_rep1_peak_1884
chr12	75540241	75540393	153	75540315	120.13	59.3418	6.72953	55.94	WT_rep1_peak_1885
chr12	75762875	75763275	401	75763160	59.74	22.4265	4.70107	19.2986	WT_rep1_peak_1886
chr12	76374340	76375878	1539	76374607	841.58	628.121	13.8127	623.681	WT_rep1_peak_1887
chr12	76376230	76377347	1118	76376642	322.32	200.929	9.90261	197.065	WT_rep1_peak_1888
chr12	76395873	76396671	799	76395997	113.57	68.8395	8.86746	65.3881	WT_rep1_peak_1889
chr12	76432079	76432431	353	76432164	43.33	12.1128	3.43083	9.12036	WT_rep1_peak_1890
chr12	76432711	76433863	1153	76433384	384.68	420.688	29.8518	416.467	WT_rep1_peak_1891
chr12	76452732	76453103	372	76452949	699.78	181.37	3.7475	177.552	WT_rep1_peak_1892
chr12	76623146	76623326	181	76623260	43.33	12.1128	3.43083	9.12036	WT_rep1_peak_1893
chr12	76624779	76625388	610	76625072	95.84	51.794	7.4956	48.4339	WT_rep1_peak_1894
chr12	76629621	76629852	232	76629692	107	17.544	2.57149	14.4771	WT_rep1_peak_1895
chr12	76659572	76660175	604	76660029	345.3	82.2829	3.46296	78.771	WT_rep1_peak_1896
chr12	76984683	76985425	743	76984914	286.87	278.665	22.2812	274.651	WT_rep1_peak_1897
chr12	77378751	77379070	320	77378936	169.37	129.04	13.1863	125.36	WT_rep1_peak_1898
chr12	77411614	77411994	381	77411737	156.24	69.3753	6.04757	65.9224	WT_rep1_peak_1899
chr12	77521857	77522614	758	77522295	390.59	429.767	30.3091	425.535	WT_rep1_peak_1900
chr12	78731276	78731425	150	78731300	64.99	22.3951	4.39928	19.2725	WT_rep1_peak_1901
chr12	78843683	78844110	428	78843968	497.59	489.445	23.7426	485.145	WT_rep1_peak_1902
chr12	78856430	78856607	178	78856539	80.09	38.6937	6.27617	35.421	WT_rep1_peak_1903
chr12	78884130	78884573	444	78884438	215.97	184.678	16.7937	180.851	WT_rep1_peak_1904
chr12	79010949	79011586	638	79011252	267.18	252.678	20.7569	248.709	WT_rep1_peak_1905
chr12	79101875	79102026	152	79101955	87.31	44.6706	6.83507	41.3547	WT_rep1_peak_1906
chr12	79222367	79222516	150	79222493	34.79	7.34946	2.77031	4.45702	WT_rep1_peak_1907
chr12	79222740	79223055	316	79222920	64.33	10.7031	2.5128	7.74126	WT_rep1_peak_1908
chr12	80155493	80155646	154	80155590	51.2	17.0072	4.04055	13.9434	WT_rep1_peak_1909
chr12	80156323	80156472	150	80156424	43.33	12.1128	3.43083	9.12036	WT_rep1_peak_1910
chr12	80385184	80386869	1686	80385483	827.14	925.987	33.1254	921.306	WT_rep1_peak_1911
chr12	80564712	80564897	186	80564859	51.86	17.0072	4.09136	13.9434	WT_rep1_peak_1912
chr12	80726364	80726915	552	80726617	323.63	330.807	25.1265	326.707	WT_rep1_peak_1913
chr12	80801006	80801876	871	80801466	59.08	22.4265	4.65026	19.2986	WT_rep1_peak_1914
chr12	80803701	80804221	521	80804083	242.23	219.381	18.8261	215.477	WT_rep1_peak_1915
chr12	80996539	80996899	361	80996709	509.41	277.042	8.23243	273.031	WT_rep1_peak_1916
chr12	81245913	81246261	349	81246048	246.17	224.637	19.131	220.721	WT_rep1_peak_1917
chr12	81251747	81251919	173	81251809	85.34	42.9376	6.68264	39.6335	WT_rep1_peak_1918
chr12	81260867	81261078	212	81260949	112.25	67.8584	8.76584	64.4111	WT_rep1_peak_1919
chr12	81361080	81361982	903	81361498	173.96	133.682	13.5419	129.989	WT_rep1_peak_1920
chr12	81401821	81401972	152	81401929	75.49	34.5825	5.9205	31.3426	WT_rep1_peak_1921
chr12	81404053	81404330	278	81404200	67.62	28.3025	5.31079	25.1155	WT_rep1_peak_1922
chr12	81514477	81514626	150	81514487	38.73	9.35981	3.07516	6.42127	WT_rep1_peak_1923
chr12	81710429	81710954	526	81710629	86	42.9376	6.73345	39.6335	WT_rep1_peak_1924
chr12	81713002	81713206	205	81713117	84.68	42.0786	6.63183	38.7814	WT_rep1_peak_1925
chr12	81768701	81769226	526	81768850	143.11	99.5163	11.0852	95.9372	WT_rep1_peak_1926
chr12	81771007	81771207	201	81771100	68.27	29.0663	5.3616	25.8712	WT_rep1_peak_1927
chr12	81790728	81790877	150	81790795	51.2	17.0072	4.04055	13.9434	WT_rep1_peak_1928
chr12	81819541	81819691	151	81819593	43.98	12.1128	3.48164	9.12036	WT_rep1_peak_1929
chr12	81965659	81966100	442	81965955	463.46	274.465	9.28917	270.458	WT_rep1_peak_1930
chr12	82042712	82043710	999	82042847	286.22	183.28	10.2577	179.457	WT_rep1_peak_1931
chr12	82388538	82389171	634	82388921	863.9	508.806	9.35024	504.487	WT_rep1_peak_1932
chr12	82471917	82472098	182	82471966	236.98	62.2577	3.71845	58.8409	WT_rep1_peak_1933
chr12	83621509	83621857	349	83621612	77.46	29.7422	4.90387	26.544	WT_rep1_peak_1934
chr12	83641253	83641422	170	83641323	163.46	85.734	7.47535	82.2079	WT_rep1_peak_1935
chr12	83641651	83642086	436	83641940	258.64	240.57	20.0964	236.622	WT_rep1_peak_1936
chr12	83710646	83710993	348	83710832	363.68	70.0786	2.98916	66.6211	WT_rep1_peak_1937
chr12	83714719	83715244	526	83714866	978.78	363.531	5.23945	359.385	WT_rep1_peak_1938
chr12	83719399	83719568	170	83719513	505.47	126.161	3.61766	122.491	WT_rep1_peak_1939
chr12	83721011	83721164	154	83721109	275.71	73.9602	3.79057	70.4843	WT_rep1_peak_1940
chr12	83780673	83781542	870	83781031	422.76	426.537	24.927	422.309	WT_rep1_peak_1941
chr12	83998751	83998901	151	83998774	43.33	12.1128	3.43083	9.12036	WT_rep1_peak_1942
chr12	83999130	83999455	326	83999377	44.64	12.6931	3.53245	9.69272	WT_rep1_peak_1943
chr12	84198370	84198666	297	84198594	31.51	5.96529	2.51626	3.11179	WT_rep1_peak_1944
chr12	84218521	84218675	155	84218557	450.99	355.917	15.0662	351.782	WT_rep1_peak_1945
chr12	84219609	84220477	869	84219736	564.55	708.379	43.7736	703.87	WT_rep1_peak_1946
chr12	84464673	84464868	196	84464722	117.51	72.8013	9.17231	69.331	WT_rep1_peak_1947
chr12	84576938	84577292	355	84577171	80.09	38.6937	6.27617	35.421	WT_rep1_peak_1948
chr12	84965662	84965813	152	84965688	183.81	64.0713	4.73866	60.6436	WT_rep1_peak_1949
chr12	84965971	84967009	1039	84966315	660.4	624.824	22.0465	620.387	WT_rep1_peak_1950
chr12	85061430	85062283	854	85062058	271.77	94.4049	4.78549	90.845	WT_rep1_peak_1951
chr12	85075657	85075863	207	85075757	118.16	36.5796	4.10904	33.3253	WT_rep1_peak_1952
chr12	85076098	85076473	376	85076327	513.35	221.526	6.12321	217.618	WT_rep1_peak_1953
chr12	85076694	85077637	944	85077046	508.75	189.184	5.20157	185.347	WT_rep1_peak_1954
chr12	85087264	85087413	150	85087353	130.63	16.9978	2.30938	13.94	WT_rep1_peak_1955
chr12	85120864	85121237	374	85120962	154.92	112	12.0685	108.375	WT_rep1_peak_1956
chr12	85182941	85183219	279	85183076	90.59	47.3066	7.08912	43.9746	WT_rep1_peak_1957
chr12	85313129	85313460	332	85313229	89.28	46.4232	6.9875	43.0958	WT_rep1_peak_1958
chr12	85314066	85314570	505	85314531	64.99	26.0491	5.10755	22.8824	WT_rep1_peak_1959
chr12	85314887	85315171	285	85315170	34.79	7.34946	2.77031	4.45702	WT_rep1_peak_1960
chr12	85348381	85348682	302	85348528	102.41	58.2635	8.00369	54.868	WT_rep1_peak_1961
chr12	85389816	85390273	458	85390074	606.57	659.604	30.3783	655.136	WT_rep1_peak_1962
chr12	85644655	85644804	150	85644676	44.64	12.6931	3.53245	9.69272	WT_rep1_peak_1963
chr12	85645049	85645198	150	85645186	48.58	15.106	3.83731	12.0697	WT_rep1_peak_1964
chr12	85685593	85686325	733	85685704	425.38	168.528	5.53746	164.74	WT_rep1_peak_1965
chr12	86928262	86929576	1315	86928659	606.57	552.467	20.2522	548.102	WT_rep1_peak_1966
chr12	87008531	87009420	890	87008668	231.73	196.805	16.6235	192.95	WT_rep1_peak_1967
chr12	87136280	87136450	171	87136321	113.57	68.8395	8.86746	65.3881	WT_rep1_peak_1968
chr12	87220865	87221027	163	87220970	168.71	112.345	10.6068	108.72	WT_rep1_peak_1969
chr12	87285812	87286479	668	87286167	363.68	326.714	19.1935	322.62	WT_rep1_peak_1970
chr12	87475609	87475868	260	87475742	137.2	93.452	10.6966	89.8945	WT_rep1_peak_1971
chr12	87497005	87497472	468	87497147	277.68	224.958	15.3968	221.042	WT_rep1_peak_1972
chr12	89006486	89006642	157	89006574	74.84	16.1382	3.03344	13.0887	WT_rep1_peak_1973
chr12	89564896	89565057	162	89564955	76.81	35.3937	6.02212	32.1463	WT_rep1_peak_1974
chr12	89579531	89579710	180	89579625	91.25	10.7383	2.14529	7.77611	WT_rep1_peak_1975
chr12	89607348	89607530	183	89607436	121.44	44.9378	4.89778	41.621	WT_rep1_peak_1976
chr12	89633374	89633681	308	89633497	61.71	6.66957	2.0228	3.7983	WT_rep1_peak_1977
chr12	89766364	89766516	153	89766436	80.74	38.6937	6.32698	35.421	WT_rep1_peak_1978
chr12	89767073	89767434	362	89767311	91.25	38.1826	5.42632	34.9158	WT_rep1_peak_1979
chr12	90039075	90039324	250	90039196	61.05	23.8549	4.80269	20.7118	WT_rep1_peak_1980
chr12	90298358	90299450	1093	90299105	1496.07	1298.69	18.7133	1293.76	WT_rep1_peak_1981
chr12	90299616	90300157	542	90299750	218.6	188.465	16.997	184.629	WT_rep1_peak_1982
chr12	90693918	90694183	266	90694040	95.19	20.1225	3.00582	17.0236	WT_rep1_peak_1983
chr12	90695432	90696455	1024	90696318	208.1	108.214	7.46774	104.603	WT_rep1_peak_1984
chr12	90705625	90705811	187	90705664	179.21	59.7436	4.50532	56.3406	WT_rep1_peak_1985
chr12	91526352	91526732	381	91526495	210.07	178.407	16.3365	174.595	WT_rep1_peak_1986
chr12	91529740	91529902	163	91529823	63.02	25.311	4.95512	22.1528	WT_rep1_peak_1987
chr12	91773044	91773597	554	91773481	297.37	131.585	6.21615	127.898	WT_rep1_peak_1988
chr12	91775057	91776776	1720	91775713	982.06	991.174	25.87	986.445	WT_rep1_peak_1989
chr12	95745321	95745479	159	95745408	49.89	15.7313	3.93893	12.6844	WT_rep1_peak_1990
chr12	95746677	95747935	1259	95747394	730.64	701.144	22.8636	696.642	WT_rep1_peak_1991
chr12	98401109	98401582	474	98401335	120.13	75.8112	9.37555	72.3266	WT_rep1_peak_1992
chr12	98635589	98635896	308	98635782	66.96	27.5449	5.25998	24.3638	WT_rep1_peak_1993
chr12	99157093	99157394	302	99157126	51.2	17.0072	4.04055	13.9434	WT_rep1_peak_1994
chr12	99161318	99161494	177	99161387	66.3	27.5449	5.20917	24.3638	WT_rep1_peak_1995
chr12	99162482	99162953	472	99162689	379.43	225.516	9.27883	221.599	WT_rep1_peak_1996
chr12	99354642	99355120	479	99354971	213.35	141.892	10.7174	138.175	WT_rep1_peak_1997
chr12	100027753	100028149	397	100028034	143.76	99.9004	11.2047	96.3187	WT_rep1_peak_1998
[truncated: 7,610 more rows]

## Sheet: Replicate2
Replicate2 of m6A-RIP
chr	start	end	length	abs_summit	pileup	-LOG10(pvalue)	fold_enrichment	-LOG10(qvalue)	name
JH584304.1	46454	46608	155	46533	71.91	27.9407	4.98468	24.7685	WT_rep2_peak_1
JH584304.1	59782	60231	450	60152	126.42	74.1264	8.52276	70.6594	WT_rep2_peak_2
MU069434.1	1682	1924	243	1805	55.09	17.127	3.8349	14.0756	WT_rep2_peak_3
chr1	3275169	3275328	160	3275218	86.4	39.4785	5.97587	36.2095	WT_rep2_peak_4
chr1	3275525	3275800	276	3275672	138.59	87.179	9.54415	83.6549	WT_rep2_peak_5
chr1	3277189	3277670	482	3277374	269.07	240.439	18.4649	236.498	WT_rep2_peak_6
chr1	3283703	3284348	646	3284136	155.41	94.9327	9.20057	91.3785	WT_rep2_peak_7
chr1	3284798	3287077	2280	3284997	196	150.416	13.4693	146.682	WT_rep2_peak_8
chr1	3644777	3645112	336	3644994	84.66	12.1797	2.37954	9.20466	WT_rep2_peak_9
chr1	3689603	3689948	346	3689850	45.81	11.3301	3.20053	8.36762	WT_rep2_peak_10
chr1	3690367	3690516	150	3690434	59.73	19.6665	4.15208	16.5826	WT_rep2_peak_11
chr1	3690857	3691298	442	3690971	69.01	26.4981	4.78644	23.3411	WT_rep2_peak_12
chr1	3691539	3691816	278	3691708	102.06	53.0126	7.04635	49.6538	WT_rep2_peak_13
chr1	3741210	3741360	151	3741327	122.36	27.1649	3.16704	24.0044	WT_rep2_peak_14
chr1	6310278	6310569	292	6310420	174.55	125.419	12.0023	121.759	WT_rep2_peak_15
chr1	6314284	6314436	153	6314330	70.17	27.2164	4.86573	24.0517	WT_rep2_peak_16
chr1	6318862	6320319	1458	6320136	410.56	396.653	22.5512	392.467	WT_rep2_peak_17
chr1	6872764	6873195	432	6872907	103.22	53.8959	7.12565	50.5313	WT_rep2_peak_18
chr1	6928798	6928947	150	6928862	49.29	13.1186	3.35269	10.1279	WT_rep2_peak_19
chr1	7190324	7190797	474	7190586	318.36	113.347	4.9132	109.727	WT_rep2_peak_20
chr1	7239708	7240109	402	7239846	662.23	709.16	29.3465	704.651	WT_rep2_peak_21
chr1	8820630	8820844	215	8820696	70.17	27.2164	4.86573	24.0517	WT_rep2_peak_22
chr1	9368412	9368732	321	9368542	121.2	50.7228	5.55438	47.3787	WT_rep2_peak_23
chr1	9616462	9617158	697	9616685	322.42	147.125	6.46834	143.4	WT_rep2_peak_24
chr1	9671473	9671795	323	9671591	84.08	23.7706	3.69929	20.6419	WT_rep2_peak_25
chr1	9794690	9795360	671	9794893	1374.33	1969.94	68.7666	1964.69	WT_rep2_peak_26
chr1	9815924	9816456	533	9816311	858.23	1063.73	43.5054	1058.96	WT_rep2_peak_27
chr1	9816603	9818210	1608	9817937	342.71	307.627	19.0952	303.572	WT_rep2_peak_28
chr1	10136653	10136974	322	10136892	84.66	37.8714	5.85693	34.6154	WT_rep2_peak_29
chr1	10208673	10208852	180	10208780	66.11	10.8434	2.48545	7.89125	WT_rep2_peak_30
chr1	11671275	11671562	288	11671401	249.35	166.419	10.8848	162.642	WT_rep2_peak_31
chr1	12929351	12929526	176	12929400	50.45	14.1246	3.51771	11.1181	WT_rep2_peak_32
chr1	13212596	13212913	318	13212693	72.49	24.5929	4.3227	21.4558	WT_rep2_peak_33
chr1	13244350	13245488	1139	13244537	339.81	261.679	14.2006	257.698	WT_rep2_peak_34
chr1	14240606	14240978	373	14240864	81.76	35.4988	5.65869	32.261	WT_rep2_peak_35
chr1	15382897	15383134	238	15383046	113.08	58.7848	7.12987	55.3941	WT_rep2_peak_36
chr1	15469703	15469970	268	15469852	127.58	68.3501	7.56324	64.91	WT_rep2_peak_37
chr1	15484775	15484983	209	15484917	70.75	19.2574	3.58731	16.1805	WT_rep2_peak_38
chr1	15780282	15780970	689	15780513	146.71	95.3609	10.0992	91.8039	WT_rep2_peak_39
chr1	15781130	15782099	970	15781464	477.83	533.131	31.9218	528.791	WT_rep2_peak_40
chr1	16176053	16176216	164	16176180	51.03	14.709	3.55736	11.6927	WT_rep2_peak_41
chr1	16299803	16300022	220	16299891	119.46	58.4889	6.69204	55.099	WT_rep2_peak_42
chr1	16412970	16413322	353	16413257	59.15	19.6665	4.11243	16.5826	WT_rep2_peak_43
chr1	16414787	16415224	438	16415086	216.3	64.4298	4.09996	61.0088	WT_rep2_peak_44
chr1	16747398	16747764	367	16747459	153.09	102.675	10.5353	99.0906	WT_rep2_peak_45
chr1	17066969	17067488	520	17067199	112.5	62.0273	7.76001	58.6183	WT_rep2_peak_46
chr1	17074202	17074895	694	17074275	93.36	45.2563	6.45164	41.9463	WT_rep2_peak_47
chr1	17086269	17086451	183	17086385	95.1	46.949	6.57058	43.6283	WT_rep2_peak_48
chr1	17161600	17161914	315	17161697	975.95	708.792	13.202	704.284	WT_rep2_peak_49
chr1	18065100	18065355	256	18065147	44.65	10.7979	3.12124	7.84597	WT_rep2_peak_50
chr1	21005541	21008619	3079	21005994	1014.22	1076.1	29.215	1071.32	WT_rep2_peak_51
chr1	21469539	21470060	522	21469843	99.74	38.256	5.03703	34.9982	WT_rep2_peak_52
chr1	21472126	21473215	1090	21472443	1362.73	1901.9	63.2823	1896.67	WT_rep2_peak_53
chr1	21948308	21948549	242	21948450	53.35	13.1415	3.19703	10.1502	WT_rep2_peak_54
chr1	22358466	22358719	254	22358483	135.11	31.9056	3.31984	28.6996	WT_rep2_peak_55
chr1	23408516	23409509	994	23409075	1772.71	1805.9	26.8744	1800.72	WT_rep2_peak_56
chr1	24067534	24068275	742	24067657	171.65	89.9281	7.50637	86.3939	WT_rep2_peak_57
chr1	24068744	24068911	168	24068847	49.29	13.5484	3.43842	10.5486	WT_rep2_peak_58
chr1	24111362	24111511	150	24111441	38.27	7.80868	2.68511	4.91926	WT_rep2_peak_59
chr1	24302159	24302955	797	24302332	102.06	53.0126	7.04635	49.6538	WT_rep2_peak_60
chr1	24802524	24802673	150	24802605	55.67	12.2106	2.98259	9.23526	WT_rep2_peak_61
chr1	25107039	25107525	487	25107324	206.44	162.138	14.1829	158.373	WT_rep2_peak_62
chr1	25113786	25114015	230	25113878	125.26	60.9618	6.64503	57.5596	WT_rep2_peak_63
chr1	25132856	25133483	628	25133263	2561.36	4008.35	94.9022	4002.46	WT_rep2_peak_64
chr1	25157721	25157956	236	25157851	138.01	87.179	9.50451	83.6549	WT_rep2_peak_65
chr1	25591509	25591658	150	25591614	50.45	14.1246	3.51771	11.1181	WT_rep2_peak_66
chr1	25598941	25599090	150	25598962	80.02	13.2217	2.53201	10.2298	WT_rep2_peak_67
chr1	25847826	25848183	358	25847940	266.17	184.625	11.616	180.803	WT_rep2_peak_68
chr1	25865100	25865925	826	25865555	323	311.347	22.1521	307.286	WT_rep2_peak_69
chr1	30842950	30844674	1725	30843079	2809.55	3174.59	35.1319	3168.9	WT_rep2_peak_70
chr1	30852649	30852803	155	30852765	53.93	15.9023	3.7556	12.8665	WT_rep2_peak_71
chr1	30868975	30870418	1444	30869510	186.14	138.915	12.7953	135.213	WT_rep2_peak_72
chr1	33778595	33779566	972	33778740	132.21	81.1725	9.10803	77.6727	WT_rep2_peak_73
chr1	33815625	33816132	508	33815904	138.01	87.179	9.50451	83.6549	WT_rep2_peak_74
chr1	33816283	33816562	280	33816375	69.01	26.4981	4.78644	23.3411	WT_rep2_peak_75
chr1	33839894	33842407	2514	33841483	1101.78	1261.04	35.5737	1256.14	WT_rep2_peak_76
chr1	34230923	34231153	231	34231013	109.6	39.9932	4.80863	36.7222	WT_rep2_peak_77
chr1	34266792	34267399	608	34267037	547.99	357.44	10.8712	353.313	WT_rep2_peak_78
chr1	34346711	34347107	397	34346840	95.1	19.9399	2.98452	16.8543	WT_rep2_peak_79
chr1	34466086	34466271	186	34466136	82.92	36.2845	5.73798	33.0401	WT_rep2_peak_80
chr1	34467197	34467349	153	34467259	74.23	30.1491	5.14327	26.9565	WT_rep2_peak_81
chr1	34468005	34468154	150	34468028	51.61	14.709	3.59701	11.6927	WT_rep2_peak_82
chr1	34471794	34471943	150	34471806	37.11	7.34647	2.60582	4.46935	WT_rep2_peak_83
chr1	34626333	34627413	1081	34627264	111.34	61.1081	7.68072	57.7031	WT_rep2_peak_84
chr1	34628029	34628723	695	34628523	303.28	285.458	20.8041	281.438	WT_rep2_peak_85
chr1	34628904	34629621	718	34628997	86.4	15.0784	2.64858	12.0592	WT_rep2_peak_86
chr1	34762760	34762947	188	34762814	58.57	19.0207	4.07278	15.9453	WT_rep2_peak_87
chr1	34763234	34763540	307	34763347	95.68	46.949	6.61023	43.6283	WT_rep2_peak_88
chr1	34850764	34851347	584	34851059	233.69	126.714	7.9964	123.051	WT_rep2_peak_89
chr1	34851493	34851771	279	34851519	63.79	9.61771	2.39954	6.69303	WT_rep2_peak_90
chr1	36142717	36143628	912	36143221	622.22	754.042	40.0784	749.496	WT_rep2_peak_91
chr1	36145081	36145430	350	36145297	298.64	278.73	20.4869	274.721	WT_rep2_peak_92
chr1	36182925	36183392	468	36183253	274.87	246.949	18.8614	242.995	WT_rep2_peak_93
chr1	36374881	36375376	496	36375089	761.97	606.669	15.5708	602.254	WT_rep2_peak_94
chr1	36463092	36463370	279	36463241	113.08	28.5747	3.45691	25.3993	WT_rep2_peak_95
chr1	36511728	36512049	322	36511864	45.23	11.3301	3.16089	8.36762	WT_rep2_peak_96
chr1	36551933	36552174	242	36552081	102.06	53.0126	7.04635	49.6538	WT_rep2_peak_97
chr1	36588340	36588569	230	36588449	184.98	136.642	12.716	132.947	WT_rep2_peak_98
chr1	36831605	36831929	325	36831727	144.97	93.2974	9.98028	89.7482	WT_rep2_peak_99
chr1	37447304	37447456	153	37447314	59.73	12.4174	2.89873	9.44071	WT_rep2_peak_100
chr1	37459369	37459607	239	37459489	99.74	50.388	6.88776	47.045	WT_rep2_peak_101
chr1	37483522	37483674	153	37483554	57.41	18.3821	3.99349	15.3128	WT_rep2_peak_102
chr1	37651200	37651352	153	37651305	264.43	77.6525	4.08037	74.1687	WT_rep2_peak_103
chr1	37662958	37663531	574	37663179	561.33	271.095	7.03793	267.099	WT_rep2_peak_104
chr1	38057824	38058595	772	38058366	398.96	209.972	7.84239	206.092	WT_rep2_peak_105
chr1	38060540	38060833	294	38060687	632.66	237.95	5.28047	234.013	WT_rep2_peak_106
chr1	38061126	38061290	165	38061242	187.88	47.2659	3.56384	43.9441	WT_rep2_peak_107
chr1	38071251	38071403	153	38071363	96.26	25.8891	3.60227	22.7391	WT_rep2_peak_108
chr1	38074961	38075129	169	38075082	327.64	50.7084	2.60822	47.3645	WT_rep2_peak_109
chr1	38090698	38090847	150	38090844	37.11	5.68615	2.24193	2.85664	WT_rep2_peak_110
chr1	38127090	38127774	685	38127618	247.03	212.285	16.9583	208.4	WT_rep2_peak_111
chr1	38247096	38247260	165	38247124	211.66	99.9014	6.64558	96.3277	WT_rep2_peak_112
chr1	38248655	38249263	609	38248782	140.91	83.9154	8.86953	80.4056	WT_rep2_peak_113
chr1	38836452	38837283	832	38836776	946.38	1115.08	38.1237	1110.27	WT_rep2_peak_114
chr1	38903012	38903407	396	38903124	91.62	43.5819	6.3327	40.2843	WT_rep2_peak_115
chr1	38903745	38904954	1210	38904675	178.03	123.004	11.1891	119.353	WT_rep2_peak_116
chr1	39591416	39591615	200	39591542	77.7	32.409	5.38115	29.1972	WT_rep2_peak_117
chr1	39657742	39658225	484	39657816	1366.21	754.571	8.54508	750.025	WT_rep2_peak_118
chr1	39658903	39659129	227	39659030	64.95	23.0001	4.50891	19.8778	WT_rep2_peak_119
chr1	39660990	39661139	150	39661022	79.44	13.2968	2.57011	10.3043	WT_rep2_peak_120
chr1	39661873	39662297	425	39662156	136.85	48.5014	4.75356	45.1722	WT_rep2_peak_121
chr1	40064271	40064420	150	40064329	111.92	57.4503	7.12417	54.0676	WT_rep2_peak_122
chr1	40115094	40115369	276	40115224	41.75	9.25841	2.923	6.33707	WT_rep2_peak_123
chr1	40352289	40353051	763	40352778	134.53	83.1619	9.26662	79.654	WT_rep2_peak_124
chr1	40668489	40668719	231	40668619	99.16	50.388	6.84812	47.045	WT_rep2_peak_125
chr1	40668955	40669307	353	40669104	111.34	61.1081	7.68072	57.7031	WT_rep2_peak_126
chr1	40806997	40807474	478	40807269	84.08	37.8714	5.81728	34.6154	WT_rep2_peak_127
chr1	42630080	42630237	158	42630169	62.63	21.6462	4.35032	18.5398	WT_rep2_peak_128
chr1	42735139	42736068	930	42735521	964.35	1013.66	28.5185	1008.92	WT_rep2_peak_129
chr1	42737188	42737475	288	42737354	142.07	44.2245	4.1712	40.9246	WT_rep2_peak_130
chr1	42737913	42739317	1405	42738049	3436.41	4577.89	56.351	4571.9	WT_rep2_peak_131
chr1	42740792	42740942	151	42740900	77.12	32.409	5.34151	29.1972	WT_rep2_peak_132
chr1	43088762	43088911	150	43088768	41.75	9.25841	2.923	6.33707	WT_rep2_peak_133
chr1	43114621	43115081	461	43114947	78.86	24.0645	3.99323	20.9343	WT_rep2_peak_134
chr1	43593276	43593663	388	43593396	103.8	20.4549	2.9111	17.3618	WT_rep2_peak_135
chr1	43608625	43609151	527	43609037	132.21	81.1725	9.10803	77.6727	WT_rep2_peak_136
chr1	44182093	44182384	292	44182236	62.05	21.6462	4.31067	18.5398	WT_rep2_peak_137
chr1	44220024	44220211	188	44220122	210.5	166.886	14.4605	163.108	WT_rep2_peak_138
chr1	46874321	46875317	997	46875097	681.95	696.858	26.3686	692.359	WT_rep2_peak_139
chr1	50992666	50992899	234	50992811	95.1	13.3416	2.34394	10.349	WT_rep2_peak_140
chr1	51023626	51023790	165	51023657	66.11	24.3802	4.5882	21.2442	WT_rep2_peak_141
chr1	51224549	51224708	160	51224564	96.26	31.2126	4.22875	28.0114	WT_rep2_peak_142
chr1	51340277	51340426	150	51340375	52.19	15.3017	3.63666	12.2754	WT_rep2_peak_143
chr1	52198559	52198936	378	52198791	93.36	45.2563	6.45164	41.9463	WT_rep2_peak_144
chr1	52226826	52226997	172	52226933	85.82	38.6725	5.93622	35.4099	WT_rep2_peak_145
chr1	52529175	52529410	236	52529294	708.04	802.01	33.8445	797.426	WT_rep2_peak_146
chr1	52695827	52696161	335	52695901	82.34	26.6002	4.1672	23.4425	WT_rep2_peak_147
chr1	52696963	52697495	533	52697107	139.17	76.8269	7.87488	73.3473	WT_rep2_peak_148
chr1	52748017	52748974	958	52748249	201.22	129.406	10.111	125.735	WT_rep2_peak_149
chr1	52827882	52828209	328	52828092	99.16	50.388	6.84812	47.045	WT_rep2_peak_150
chr1	52828766	52829251	486	52829061	153.09	102.675	10.5353	99.0906	WT_rep2_peak_151
chr1	53851989	53852327	339	53852132	107.28	57.4701	7.40318	54.0849	WT_rep2_peak_152
chr1	53965360	53965564	205	53965461	84.66	37.8714	5.85693	34.6154	WT_rep2_peak_153
chr1	55117354	55117596	243	55117496	84.08	37.0321	5.67224	33.7845	WT_rep2_peak_154
chr1	55211020	55211173	154	55211125	132.79	81.1725	9.14768	77.6727	WT_rep2_peak_155
chr1	55277453	55278351	899	55277912	178.61	129.879	12.2798	126.206	WT_rep2_peak_156
chr1	55734914	55735515	602	55735403	132.21	34.6833	3.60038	31.4565	WT_rep2_peak_157
chr1	55736128	55737346	1219	55736940	271.97	243.038	18.6631	239.092	WT_rep2_peak_158
chr1	56835256	56836197	942	56835752	112.5	62.0273	7.76001	58.6183	WT_rep2_peak_159
chr1	57422004	57422767	764	57422378	180.92	132.124	12.4384	128.443	WT_rep2_peak_160
chr1	57427614	57427763	150	57427691	44.07	10.7979	3.08159	7.84597	WT_rep2_peak_161
chr1	58424049	58424199	151	58424144	75.97	30.8968	5.26221	27.697	WT_rep2_peak_162
chr1	58425460	58425609	150	58425557	53.35	15.9023	3.71595	12.8665	WT_rep2_peak_163
chr1	58500513	58500872	360	58500695	62.63	21.6462	4.35032	18.5398	WT_rep2_peak_164
chr1	58502809	58503102	294	58502859	103.22	53.8959	7.12565	50.5313	WT_rep2_peak_165
chr1	58568860	58569450	591	58569305	414.62	221.417	7.99267	217.513	WT_rep2_peak_166
chr1	58941801	58943297	1497	58942592	2372.9	2036.24	18.4023	2030.97	WT_rep2_peak_167
chr1	59202178	59202611	434	59202540	179.76	131	12.3591	127.323	WT_rep2_peak_168
chr1	59203141	59203303	163	59203274	108.44	58.3737	7.48248	54.9844	WT_rep2_peak_169
chr1	59254638	59254787	150	59254747	85.82	29.18	4.42976	25.9996	WT_rep2_peak_170
chr1	59523859	59524136	278	59523995	47.55	12.4216	3.31948	9.44188	WT_rep2_peak_171
chr1	59678654	59679171	518	59678991	544.51	644.089	37.2975	639.637	WT_rep2_peak_172
chr1	59749570	59749747	178	59749663	78.86	33.1733	5.46045	29.9546	WT_rep2_peak_173
chr1	59803475	59803708	234	59803587	329.38	273.224	16.2347	269.224	WT_rep2_peak_174
chr1	59906596	59907671	1076	59907141	402.44	196.355	7.07792	192.505	WT_rep2_peak_175
chr1	59909501	59909755	255	59909640	119.46	47.2022	5.23725	43.8807	WT_rep2_peak_176
chr1	60020639	60021487	849	60021103	648.89	814.798	44.4341	810.202	WT_rep2_peak_177
chr1	60021747	60021911	165	60021795	44.65	10.7979	3.12124	7.84597	WT_rep2_peak_178
chr1	60029753	60030238	486	60030097	139.75	88.1911	9.62345	84.6627	WT_rep2_peak_179
chr1	60515764	60516550	787	60516224	952.17	1104.89	36.5902	1100.08	WT_rep2_peak_180
chr1	60517808	60517957	150	60517948	56.83	17.5106	3.90736	14.4571	WT_rep2_peak_181
chr1	60527372	60527999	628	60527609	374.61	359.472	22.0945	355.342	WT_rep2_peak_182
chr1	62742914	62743409	496	62743187	570.03	531.156	21.1492	526.818	WT_rep2_peak_183
chr1	62758040	62758201	162	62758087	104.38	54.7833	7.20495	51.4133	WT_rep2_peak_184
chr1	62854687	62855195	509	62854935	360.11	360.469	24.074	356.337	WT_rep2_peak_185
chr1	63097079	63097613	535	63097524	155.41	104.79	10.6939	101.198	WT_rep2_peak_186
chr1	63097757	63097906	150	63097830	52.19	15.3017	3.63666	12.2754	WT_rep2_peak_187
chr1	63098087	63098266	180	63098118	73.65	29.4072	5.10362	26.2221	WT_rep2_peak_188
chr1	63125182	63125664	483	63125354	278.93	252.185	19.1389	248.221	WT_rep2_peak_189
chr1	63344119	63344268	150	63344260	48.13	8.90178	2.58582	5.99084	WT_rep2_peak_190
chr1	63346453	63346636	184	63346599	94.52	46.1004	6.53093	42.7859	WT_rep2_peak_191
chr1	63348864	63349092	229	63348972	62.63	21.6462	4.35032	18.5398	WT_rep2_peak_192
chr1	63556386	63556541	156	63556426	46.97	11.8714	3.27983	8.89882	WT_rep2_peak_193
chr1	63631849	63632594	746	63632089	364.17	370.256	24.9671	366.11	WT_rep2_peak_194
chr1	63770869	63771266	398	63771010	102.06	53.0126	7.04635	49.6538	WT_rep2_peak_195
chr1	64074021	64074978	958	64074679	262.69	231.394	18.0287	227.47	WT_rep2_peak_196
chr1	64118023	64118321	299	64118038	106.7	25.8298	3.3656	22.6804	WT_rep2_peak_197
chr1	64636258	64636982	725	64636646	322.42	311.347	22.1124	307.286	WT_rep2_peak_198
chr1	64762748	64763028	281	64762888	75.39	30.8968	5.22256	27.697	WT_rep2_peak_199
chr1	64833532	64834031	500	64833783	238.33	201.007	16.3636	197.147	WT_rep2_peak_200
chr1	64960919	64961259	341	64961212	64.37	23.0001	4.46926	19.8778	WT_rep2_peak_201
chr1	64961606	64961755	150	64961653	53.35	15.9023	3.71595	12.8665	WT_rep2_peak_202
chr1	64976919	64977464	546	64977188	274.29	215.592	14.4888	211.701	WT_rep2_peak_203
chr1	65285497	65286293	797	65285634	200.64	142.085	11.8612	138.376	WT_rep2_peak_204
chr1	65312742	65313086	345	65312828	63.21	22.3198	4.38996	19.2056	WT_rep2_peak_205
chr1	66451650	66452196	547	66451777	865.77	179.287	3.17498	175.478	WT_rep2_peak_206
chr1	66453853	66454144	292	66453918	1146.44	205.353	2.89027	201.483	WT_rep2_peak_207
chr1	66700140	66700289	150	66700185	48.13	12.9807	3.35912	9.99094	WT_rep2_peak_208
chr1	66700630	66700779	150	66700667	73.65	29.4072	5.10362	26.2221	WT_rep2_peak_209
chr1	66734421	66734958	538	66734828	1213.12	1152.02	22.6304	1147.19	WT_rep2_peak_210
chr1	66736851	66737000	150	66736937	53.35	15.9023	3.71595	12.8665	WT_rep2_peak_211
chr1	66740355	66740611	257	66740560	44.65	10.7979	3.12124	7.84597	WT_rep2_peak_212
chr1	66840291	66840979	689	66840831	133.95	82.1656	9.22697	78.6613	WT_rep2_peak_213
chr1	68077880	68078165	286	68078024	71.91	22.4631	4.05033	19.3479	WT_rep2_peak_214
chr1	68079083	68079550	468	68079371	335.75	251.229	13.4702	247.268	WT_rep2_peak_215
chr1	69005377	69005663	287	69005504	95.68	46.949	6.61023	43.6283	WT_rep2_peak_216
chr1	72340460	72340705	246	72340556	35.37	6.4551	2.48688	3.59953	WT_rep2_peak_217
chr1	72467781	72468202	422	72467916	76.55	31.6501	5.30186	28.4452	WT_rep2_peak_218
chr1	72574985	72575545	561	72575232	72.49	28.671	5.02432	25.4931	WT_rep2_peak_219
chr1	72625206	72625494	289	72625398	490	411.407	16.9312	407.203	WT_rep2_peak_220
chr1	72897670	72898530	861	72898395	245.29	78.576	4.39807	75.0877	WT_rep2_peak_221
chr1	72898678	72899681	1004	72899426	2122.39	2829.94	55.8786	2824.38	WT_rep2_peak_222
chr1	72901229	72901447	219	72901344	387.94	218.712	8.62404	214.814	WT_rep2_peak_223
chr1	73953504	73953702	199	73953612	85.24	38.6725	5.89657	35.4099	WT_rep2_peak_224
chr1	74478280	74478429	150	74478380	49.29	13.5484	3.43842	10.5486	WT_rep2_peak_225
chr1	74605833	74606270	438	74606141	73.07	28.6968	4.93772	25.5185	WT_rep2_peak_226
chr1	74609568	74609737	170	74609700	51.61	14.709	3.59701	11.6927	WT_rep2_peak_227
chr1	74718721	74719176	456	74718914	106.7	56.5704	7.36353	53.1907	WT_rep2_peak_228
chr1	74895060	74896127	1068	74895315	962.61	810.934	17.4726	806.342	WT_rep2_peak_229
chr1	75123247	75123736	490	75123592	173.39	43.9792	3.5589	40.6801	WT_rep2_peak_230
chr1	75191636	75192148	513	75191774	1425.94	1676.78	38.566	1671.67	WT_rep2_peak_231
chr1	75192290	75192541	252	75192424	2479.6	1985.09	16.0038	1979.83	WT_rep2_peak_232
chr1	75192773	75193197	425	75193054	3302.45	3415.55	28.1026	3409.79	WT_rep2_peak_233
chr1	75365241	75365600	360	75365343	187.88	20.8322	2.17107	17.7374	WT_rep2_peak_234
chr1	75408201	75408567	367	75408330	291.68	60.1366	3.11365	56.7394	WT_rep2_peak_235
chr1	75451249	75451883	635	75451432	189.62	135.007	11.9139	131.319	WT_rep2_peak_236
chr1	75452072	75452406	335	75452275	91.04	32.6021	4.60211	29.3893	WT_rep2_peak_237
chr1	75454071	75454404	334	75454220	124.1	53.0385	5.68617	49.6796	WT_rep2_peak_238
chr1	75483092	75483408	317	75483228	67.27	25.0799	4.6675	21.9363	WT_rep2_peak_239
chr1	77344938	77346418	1481	77346269	523.64	495.542	21.8599	491.24	WT_rep2_peak_240
chr1	77349579	77350606	1028	77349852	760.23	632.491	16.9163	628.051	WT_rep2_peak_241
chr1	77483302	77483884	583	77483661	1217.76	671.419	8.52281	666.941	WT_rep2_peak_242
chr1	78642109	78642283	175	78642225	201.22	121.49	9.19185	117.843	WT_rep2_peak_243
chr1	78642609	78643429	821	78643123	399.54	314.08	14.8349	310.015	WT_rep2_peak_244
chr1	78643637	78644575	939	78643872	199.48	144.569	12.2995	140.852	WT_rep2_peak_245
chr1	78659531	78659680	150	78659607	125.26	47.8008	5.05022	44.4753	WT_rep2_peak_246
chr1	78683942	78684408	467	78684084	300.38	51.6159	2.76497	48.2662	WT_rep2_peak_247
chr1	79412763	79413373	611	79413006	234.27	87.6731	5.11466	84.1478	WT_rep2_peak_248
chr1	79413639	79414320	682	79413976	1066.41	502.302	6.88653	497.992	WT_rep2_peak_249
chr1	79755597	79755756	160	79755674	51.03	14.709	3.55736	11.6927	WT_rep2_peak_250
chr1	80244679	80245086	408	80244949	252.83	102.947	5.64068	99.3618	WT_rep2_peak_251
chr1	80583161	80583335	175	80583221	57.99	18.3821	4.03313	15.3128	WT_rep2_peak_252
chr1	80595391	80595542	152	80595437	51.03	14.709	3.55736	11.6927	WT_rep2_peak_253
chr1	82215033	82215404	372	82215144	146.13	95.3609	10.0596	91.8039	WT_rep2_peak_254
chr1	82264510	82265328	819	82264622	178.03	129.879	12.2402	126.206	WT_rep2_peak_255
chr1	82265968	82266131	164	82266053	93.94	45.2563	6.49129	41.9463	WT_rep2_peak_256
chr1	83253499	83254054	556	83253753	517.84	218.015	5.96367	214.118	WT_rep2_peak_257
chr1	83256529	83257060	532	83256665	212.82	98.3568	6.48918	94.7899	WT_rep2_peak_258
chr1	84014613	84014762	150	84014757	67.27	25.0799	4.6675	21.9363	WT_rep2_peak_259
chr1	84014909	84015882	974	84015315	155.41	104.79	10.6939	101.198	WT_rep2_peak_260
chr1	84255451	84255912	462	84255518	50.45	12.5779	3.21563	9.59689	WT_rep2_peak_261
chr1	84702277	84702628	352	84702484	96.84	16.459	2.64435	13.4198	WT_rep2_peak_262
chr1	84763872	84764048	177	84763926	103.22	53.8959	7.12565	50.5313	WT_rep2_peak_263
chr1	84771247	84772161	915	84771847	712.68	437.269	9.91223	433.033	WT_rep2_peak_264
chr1	84890485	84890696	212	84890581	53.35	15.9023	3.71595	12.8665	WT_rep2_peak_265
chr1	85776967	85777704	738	85777331	672.67	551.946	16.4309	547.587	WT_rep2_peak_266
chr1	86061213	86061362	150	86061356	192.52	48.9299	3.58375	45.5977	WT_rep2_peak_267
chr1	86064564	86064715	152	86064685	246.45	58.7489	3.43683	55.3584	WT_rep2_peak_268
chr1	86278023	86278775	753	86278383	683.11	440.507	10.6892	436.268	WT_rep2_peak_269
chr1	86284168	86284523	356	86284439	1746.62	855.58	7.27417	850.953	WT_rep2_peak_270
chr1	86284715	86285066	352	86284841	1093.67	168.794	2.64412	165.012	WT_rep2_peak_271
chr1	86457398	86457704	307	86457683	458.11	40.5916	2.00485	37.3167	WT_rep2_peak_272
chr1	87165765	87165915	151	87165782	52.19	15.3017	3.63666	12.2754	WT_rep2_peak_273
chr1	87166140	87166684	545	87166648	69.01	26.4981	4.78644	23.3411	WT_rep2_peak_274
chr1	88193760	88194088	329	88193919	123.52	72.3838	8.51332	68.9237	WT_rep2_peak_275
chr1	88628017	88628437	421	88628319	55.67	17.127	3.87454	14.0756	WT_rep2_peak_276
chr1	88628604	88628983	380	88628837	336.33	236.437	12.0477	232.504	WT_rep2_peak_277
chr1	89080943	89081405	463	89081006	52.77	15.3017	3.67631	12.2754	WT_rep2_peak_278
chr1	89816403	89817030	628	89816902	171.65	80.7857	6.55205	77.2889	WT_rep2_peak_279
chr1	89818026	89818770	745	89818332	281.82	256.128	19.3371	252.157	WT_rep2_peak_280
chr1	90539942	90540091	150	90539979	91.04	21.9871	3.28722	18.8789	WT_rep2_peak_281
chr1	90540260	90540776	517	90540633	131.63	80.1827	9.06838	76.6873	WT_rep2_peak_282
chr1	91055767	91056450	684	91056239	117.72	66.6801	8.11684	63.2469	WT_rep2_peak_283
chr1	91213171	91213620	450	91213389	201.8	148.416	12.675	144.687	WT_rep2_peak_284
chr1	91344173	91344647	475	91344312	166.43	98.3148	8.81197	94.748	WT_rep2_peak_285
chr1	91345207	91345877	671	91345586	168.75	93.3878	8.08319	89.8384	WT_rep2_peak_286
chr1	91428656	91429062	407	91428865	277.77	111.654	5.57531	108.039	WT_rep2_peak_287
chr1	91482737	91483002	266	91482870	60.31	20.3195	4.19172	17.2272	WT_rep2_peak_288
chr1	91860070	91860974	905	91860796	396.64	400.593	24.8527	396.402	WT_rep2_peak_289
chr1	92847457	92848072	616	92848011	66.69	13.1372	2.82029	10.1461	WT_rep2_peak_290
chr1	93227317	93227496	180	93227431	68.43	25.7859	4.74679	22.6367	WT_rep2_peak_291
chr1	93229218	93229551	334	93229347	176.29	127.644	12.1212	123.977	WT_rep2_peak_292
chr1	93293381	93294203	823	93294056	195.42	108.742	8.18424	105.137	WT_rep2_peak_293
chr1	93779534	93779715	182	93779648	57.99	18.3821	4.03313	15.3128	WT_rep2_peak_294
chr1	95519071	95519730	660	95519474	83.5	37.0754	5.77763	33.8259	WT_rep2_peak_295
chr1	97573305	97573941	637	97573570	216.3	128.783	9.05407	125.113	WT_rep2_peak_296
chr1	104921907	104922292	386	104922157	200.06	155.079	13.7468	151.333	WT_rep2_peak_297
chr1	105958238	105959031	794	105958565	125.84	74.3131	8.67191	70.8436	WT_rep2_peak_298
chr1	106320368	106321250	883	106321028	1030.46	839.761	16.3724	835.146	WT_rep2_peak_299
chr1	106469544	106469898	355	106469656	97.42	48.6597	6.72917	45.3284	WT_rep2_peak_300
chr1	106640156	106640315	160	106640211	98.58	49.5217	6.80847	46.1845	WT_rep2_peak_301
chr1	106640584	106640733	150	106640684	59.15	19.6665	4.11243	16.5826	WT_rep2_peak_302
chr1	106652359	106652780	422	106652668	139.75	88.1911	9.62345	84.6627	WT_rep2_peak_303
chr1	111787619	111787846	228	111787734	99.16	50.388	6.84812	47.045	WT_rep2_peak_304
chr1	111789150	111789299	150	111789186	50.45	14.1246	3.51771	11.1181	WT_rep2_peak_305
chr1	111791181	111791446	266	111791302	103.22	53.8959	7.12565	50.5313	WT_rep2_peak_306
chr1	118347375	118347547	173	118347452	91.04	43.5819	6.29305	40.2843	WT_rep2_peak_307
chr1	118536394	118536968	575	118536539	432.02	368.034	17.3206	363.892	WT_rep2_peak_308
chr1	118763934	118764098	165	118764051	53.93	15.9023	3.7556	12.8665	WT_rep2_peak_309
chr1	119454909	119455533	625	119455001	60.89	20.3195	4.23137	17.2272	WT_rep2_peak_310
chr1	119586846	119587713	868	119587309	309.08	293.58	21.2006	289.546	WT_rep2_peak_311
chr1	120270377	120270810	434	120270703	168.17	96.7211	8.45836	93.1591	WT_rep2_peak_312
chr1	123261778	123262154	377	123262004	194.26	148.098	13.3503	144.37	WT_rep2_peak_313
chr1	124213515	124213664	150	124213560	56.25	17.7508	3.91419	14.6903	WT_rep2_peak_314
chr1	125796355	125796546	192	125796433	81.76	35.4988	5.65869	32.261	WT_rep2_peak_315
chr1	125800070	125800624	555	125800143	1767.49	1066.54	9.77069	1061.76	WT_rep2_peak_316
chr1	125800786	125801097	312	125800949	126.42	75.283	8.71155	71.8087	WT_rep2_peak_317
chr1	127410169	127410808	640	127410447	256.31	223.705	17.5926	219.796	WT_rep2_peak_318
chr1	127730034	127731707	1674	127731130	402.44	412.558	25.6969	408.352	WT_rep2_peak_319
chr1	127751541	127751699	159	127751657	82.34	36.2845	5.69833	33.0401	WT_rep2_peak_320
chr1	128188434	128188589	156	128188571	132.21	17.7505	2.33709	14.6903	WT_rep2_peak_321
chr1	128190407	128190630	224	128190529	255.15	103.171	5.56848	99.5854	WT_rep2_peak_322
chr1	128193950	128194100	151	128194025	128.15	77.2328	8.8305	73.7501	WT_rep2_peak_323
chr1	128226282	128226574	293	128226407	79.44	33.9432	5.5001	30.7193	WT_rep2_peak_324
chr1	128227612	128228929	1318	128227753	610.04	751.518	41.7777	746.975	WT_rep2_peak_325
chr1	128235558	128235907	350	128235618	56.25	17.7508	3.91419	14.6903	WT_rep2_peak_326
chr1	130618345	130618905	561	130618472	69.59	26.4981	4.82609	23.3411	WT_rep2_peak_327
chr1	130646584	130647406	823	130646708	113.66	62.9504	7.83931	59.5363	WT_rep2_peak_328
chr1	131056291	131057455	1165	131056435	161.79	111.202	11.1301	107.588	WT_rep2_peak_329
chr1	131107357	131107682	326	131107433	49.29	13.5484	3.43842	10.5486	WT_rep2_peak_330
chr1	131214413	131214582	170	131214464	52.19	15.3017	3.63666	12.2754	WT_rep2_peak_331
chr1	131217124	131217347	224	131217220	95.1	46.949	6.57058	43.6283	WT_rep2_peak_332
chr1	131855751	131855906	156	131855802	238.33	139.292	8.8642	135.591	WT_rep2_peak_333
chr1	131857217	131857399	183	131857352	175.71	22.6197	2.32507	19.5035	WT_rep2_peak_334
chr1	131858697	131858868	172	131858806	117.72	66.6801	8.11684	63.2469	WT_rep2_peak_335
chr1	131945759	131946181	423	131946033	284.72	260.085	19.5354	256.107	WT_rep2_peak_336
chr1	131954751	131955248	498	131954998	118.88	67.6217	8.19614	64.1836	WT_rep2_peak_337
chr1	132285502	132285653	152	132285563	50.45	14.1246	3.51771	11.1181	WT_rep2_peak_338
chr1	132286723	132286888	166	132286788	209.92	112.115	7.81181	108.499	WT_rep2_peak_339
chr1	132288035	132288746	712	132288168	1118.6	906.516	16.2261	901.848	WT_rep2_peak_340
chr1	132318920	132319290	371	132319022	340.39	162.097	6.82787	158.332	WT_rep2_peak_341
chr1	132377019	132377619	601	132377365	110.18	60.1927	7.60142	56.7929	WT_rep2_peak_342
chr1	132431519	132431945	427	132431629	161.21	57.3242	4.77084	53.9419	WT_rep2_peak_343
chr1	132441752	132442548	797	132442498	70.75	27.2164	4.90538	24.0517	WT_rep2_peak_344
chr1	132442714	132443242	529	132442813	104.96	54.7833	7.24459	51.4133	WT_rep2_peak_345
chr1	132496902	132497692	791	132497393	177.45	98.5058	8.11115	94.9369	WT_rep2_peak_346
chr1	132525238	132525387	150	132525361	51.61	14.709	3.59701	11.6927	WT_rep2_peak_347
chr1	132526255	132526676	422	132526565	116.56	55.9518	6.53096	52.5767	WT_rep2_peak_348
chr1	132535308	132535915	608	132535424	80.02	34.7183	5.53974	31.4876	WT_rep2_peak_349
chr1	132865456	132867664	2209	132866452	909.26	589.042	10.8365	584.644	WT_rep2_peak_350
chr1	132919371	132920052	682	132919666	627.44	563.046	19.6387	558.675	WT_rep2_peak_351
chr1	132994468	132994647	180	132994542	38.85	7.80868	2.72476	4.91926	WT_rep2_peak_352
chr1	133060323	133061269	947	133060828	299.8	249.852	16.3479	245.893	WT_rep2_peak_353
chr1	133064309	133064570	262	133064432	60.31	17.0741	3.60637	14.0282	WT_rep2_peak_354
chr1	133227961	133228110	150	133228069	242.97	47.002	2.97527	43.6811	WT_rep2_peak_355
chr1	133228640	133229022	383	133228674	86.4	34.0435	5.08158	30.8191	WT_rep2_peak_356
chr1	133547831	133548328	498	133548065	383.31	314.364	16.0127	310.298	WT_rep2_peak_357
chr1	133548832	133549564	733	133549416	236.01	127.424	7.90046	123.759	WT_rep2_peak_358
chr1	133584555	133584705	151	133584686	98	45.9809	6.18755	42.6683	WT_rep2_peak_359
chr1	133584960	133586053	1094	133585080	100.32	51.2586	6.92741	47.9099	WT_rep2_peak_360
chr1	133586914	133587740	827	133587271	513.2	308.655	9.52222	304.598	WT_rep2_peak_361
chr1	133634165	133634842	678	133634457	110.18	60.1927	7.60142	56.7929	WT_rep2_peak_362
chr1	133680969	133681457	489	133681178	461.01	513.978	31.5882	509.658	WT_rep2_peak_363
chr1	133840063	133840325	263	133840205	176.29	127.644	12.1212	123.977	WT_rep2_peak_364
chr1	133842199	133842613	415	133842410	242.39	87.9703	4.9672	84.4441	WT_rep2_peak_365
chr1	134004797	134005209	413	134005097	174.55	118.711	10.9716	115.074	WT_rep2_peak_366
chr1	134127065	134127450	386	134127385	151.93	43.0449	3.89631	39.7527	WT_rep2_peak_367
chr1	134128987	134129445	459	134129303	536.98	209.688	5.48954	205.81	WT_rep2_peak_368
chr1	134129683	134131039	1357	134129802	1670.65	1824.5	31.8714	1819.32	WT_rep2_peak_369
chr1	134162292	134162519	228	134162376	159.47	49.7169	4.22286	46.3791	WT_rep2_peak_370
chr1	134226012	134226162	151	134226023	48.13	12.9807	3.35912	9.99094	WT_rep2_peak_371
chr1	134359651	134359938	288	134359829	52.19	15.3017	3.63666	12.2754	WT_rep2_peak_372
chr1	134433833	134434392	560	134434158	162.37	112.28	11.1697	108.662	WT_rep2_peak_373
chr1	134558165	134558471	307	134558201	208.76	128.433	9.53451	124.764	WT_rep2_peak_374
chr1	134558728	134559357	630	134559034	211.66	105.178	7.08862	101.585	WT_rep2_peak_375
chr1	134675856	134676415	560	134676158	101.48	52.1335	7.00671	48.7804	WT_rep2_peak_376
chr1	134676565	134676715	151	134676661	54.51	16.5108	3.79525	13.4685	WT_rep2_peak_377
chr1	134682565	134682714	150	134682680	67.27	25.0799	4.6675	21.9363	WT_rep2_peak_378
chr1	134682951	134683348	398	134683051	183.82	122.793	10.7456	119.142	WT_rep2_peak_379
chr1	135088110	135088259	150	135088135	65.53	12.6697	2.77197	9.68794	WT_rep2_peak_380
chr1	135088708	135089299	592	135089047	111.92	22.5544	2.97153	19.4386	WT_rep2_peak_381
chr1	135094963	135095112	150	135095002	95.68	22.0472	3.22271	18.9387	WT_rep2_peak_382
chr1	135229397	135229657	261	135229533	128.73	46.3601	4.80499	43.0446	WT_rep2_peak_383
chr1	135298826	135299077	252	135298959	62.05	12.0979	2.74121	9.12355	WT_rep2_peak_384
chr1	135310759	135310986	228	135310859	52.77	15.3017	3.67631	12.2754	WT_rep2_peak_385
chr1	135312694	135313222	529	135312974	944.64	1144.22	41.1146	1139.39	WT_rep2_peak_386
chr1	135366336	135366704	369	135366473	127.58	76.2562	8.79085	72.7781	WT_rep2_peak_387
chr1	135368122	135369625	1504	135369140	1188.77	1230.13	27.669	1225.25	WT_rep2_peak_388
chr1	135397453	135397785	333	135397515	67.27	14.4988	2.96812	11.4892	WT_rep2_peak_389
chr1	135512309	135512619	311	135512495	130.47	37.2098	3.8669	33.9598	WT_rep2_peak_390
chr1	136103391	136104112	722	136103857	67.85	25.0799	4.70714	21.9363	WT_rep2_peak_391
chr1	136104732	136104885	154	136104760	85.82	38.6725	5.93622	35.4099	WT_rep2_peak_392
chr1	136198146	136198955	810	136198640	993.93	1067.38	30.1493	1062.6	WT_rep2_peak_393
chr1	136204330	136204631	302	136204493	419.26	97.6362	3.41673	94.071	WT_rep2_peak_394
chr1	136204960	136205213	254	136205073	292.84	153.704	7.73271	149.962	WT_rep2_peak_395
chr1	136208052	136208783	732	136208348	474.35	286.785	9.58362	282.762	WT_rep2_peak_396
chr1	136553288	136554624	1337	136554204	551.47	488.896	19.0508	484.602	WT_rep2_peak_397
chr1	136554810	136555683	874	136555341	464.49	518.575	31.8261	514.25	WT_rep2_peak_398
chr1	139351310	139351809	500	139351601	211.66	110.893	7.59495	107.282	WT_rep2_peak_399
chr1	139374742	139375163	422	139374880	171.65	122.1	11.8041	118.451	WT_rep2_peak_400
chr1	143516572	143517031	460	143516750	132.79	39.7667	4.05437	36.4965	WT_rep2_peak_401
chr1	143521613	143521800	188	143521722	244.13	156.86	10.2139	153.109	WT_rep2_peak_402
chr1	143521948	143523207	1260	143522283	967.25	1146.19	38.73	1141.36	WT_rep2_peak_403
chr1	143633347	143633500	154	143633362	113.08	17.9528	2.53506	14.8912	WT_rep2_peak_404
chr1	143646345	143646706	362	143646443	312.56	297.659	21.4384	293.619	WT_rep2_peak_405
chr1	143877142	143877606	465	143877279	143.81	92.2701	9.90098	88.7253	WT_rep2_peak_406
chr1	146777243	146777814	572	146777377	208.76	164.508	14.3415	160.736	WT_rep2_peak_407
chr1	150315707	150315856	150	150315812	131.05	37.8129	3.88395	34.5606	WT_rep2_peak_408
chr1	150316066	150316217	152	150316142	71.33	27.9407	4.94503	24.7685	WT_rep2_peak_409
chr1	151694031	151695123	1093	151694398	1219.5	1743.69	67.8057	1738.55	WT_rep2_peak_410
chr1	151767036	151767370	335	151767306	77.12	32.409	5.34151	29.1972	WT_rep2_peak_411
chr1	151768539	151769141	603	151769061	371.13	380.285	25.4428	376.124	WT_rep2_peak_412
chr1	152393735	152395058	1324	152394765	513.2	509.237	24.1976	504.921	WT_rep2_peak_413
chr1	152397110	152397259	150	152397180	53.35	15.9023	3.71595	12.8665	WT_rep2_peak_414
chr1	152400477	152400652	176	152400563	86.98	15.8513	2.74947	12.8214	WT_rep2_peak_415
chr1	152713496	152713989	494	152713864	370.55	169.47	6.51838	165.686	WT_rep2_peak_416
chr1	152991391	152991540	150	152991460	59.73	19.6665	4.15208	16.5826	WT_rep2_peak_417
chr1	153096887	153097543	657	153097452	93.36	45.2563	6.45164	41.9463	WT_rep2_peak_418
chr1	153568348	153568947	600	153568662	154.25	75.0933	6.74999	71.6217	WT_rep2_peak_419
chr1	153569846	153569995	150	153569966	98	14.5178	2.41465	11.5081	WT_rep2_peak_420
chr1	153571384	153571580	197	153571497	85.82	38.6725	5.93622	35.4099	WT_rep2_peak_421
chr1	153571723	153572328	606	153571861	99.74	50.388	6.88776	47.045	WT_rep2_peak_422
chr1	153619750	153619936	187	153619801	132.21	81.1725	9.10803	77.6727	WT_rep2_peak_423
chr1	153783692	153784440	749	153783883	2919.15	2061.61	12.6963	2056.32	WT_rep2_peak_424
chr1	154267231	154267493	263	154267240	109.6	15.9543	2.42807	12.9181	WT_rep2_peak_425
chr1	154273452	154274567	1116	154274111	5979.21	5109.94	18.3442	5103.88	WT_rep2_peak_426
chr1	154294864	154295240	377	154294947	74.81	30.1491	5.18292	26.9565	WT_rep2_peak_427
chr1	154347843	154348214	372	154347956	1635.86	1054.27	10.8401	1049.5	WT_rep2_peak_428
chr1	154602055	154602402	348	154602118	168.75	87.5465	7.41253	84.0215	WT_rep2_peak_429
chr1	154973452	154974401	950	154974181	439.55	415.995	21.6488	411.785	WT_rep2_peak_430
chr1	155077752	155078394	643	155078134	192.52	109.25	8.41402	105.644	WT_rep2_peak_431
chr1	155152284	155152447	164	155152433	39.43	8.28157	2.76441	5.38395	WT_rep2_peak_432
chr1	155156336	155156826	491	155156542	295.16	274.71	20.249	270.708	WT_rep2_peak_433
chr1	155655222	155655628	407	155655358	126.42	75.283	8.71155	71.8087	WT_rep2_peak_434
chr1	155722736	155723274	539	155722925	220.36	178.898	15.1345	175.089	WT_rep2_peak_435
chr1	155723494	155723643	150	155723530	47.55	12.4216	3.31948	9.44188	WT_rep2_peak_436
chr1	155723825	155724108	284	155723970	73.07	29.4072	5.06397	26.2221	WT_rep2_peak_437
chr1	155737506	155737727	222	155737585	81.18	35.4988	5.61904	32.261	WT_rep2_peak_438
chr1	155738107	155738387	281	155738247	143.23	92.2701	9.86134	88.7253	WT_rep2_peak_439
chr1	155803931	155804095	165	155804004	71.91	27.2538	4.8604	24.0887	WT_rep2_peak_440
chr1	155804317	155804909	593	155804788	76.55	21.5405	3.69262	18.4391	WT_rep2_peak_441
chr1	155808600	155809023	424	155808833	140.91	18.9799	2.36521	15.9071	WT_rep2_peak_442
chr1	155828954	155829389	436	155829141	727.76	949.384	49.8261	944.683	WT_rep2_peak_443
chr1	155882530	155883439	910	155882678	288.2	265.382	19.7732	261.395	WT_rep2_peak_444
chr1	155927062	155927614	553	155927385	451.15	480.455	28.2595	476.169	WT_rep2_peak_445
chr1	155940836	155941476	641	155941161	77.7	32.409	5.38115	29.1972	WT_rep2_peak_446
chr1	156468519	156468876	358	156468739	103.22	21.336	2.97771	18.2359	WT_rep2_peak_447
chr1	156469020	156470625	1606	156470407	547.41	342.697	10.1558	338.591	WT_rep2_peak_448
chr1	156508414	156509291	878	156508968	289.94	204.832	12.1226	200.964	WT_rep2_peak_449
chr1	156533307	156533536	230	156533373	53.93	15.9023	3.7556	12.8665	WT_rep2_peak_450
chr1	156636378	156636639	262	156636521	64.95	23.0001	4.50891	19.8778	WT_rep2_peak_451
chr1	156967945	156968470	526	156968262	78.86	33.1733	5.46045	29.9546	WT_rep2_peak_452
chr1	156975275	156975509	235	156975392	78.86	21.4849	3.63021	18.3839	WT_rep2_peak_453
chr1	156984519	156985149	631	156984607	175.13	92.9215	7.59163	89.3752	WT_rep2_peak_454
chr1	157003386	157003751	366	157003571	340.39	336.321	23.3415	332.223	WT_rep2_peak_455
chr1	157096536	157096953	418	157096616	51.03	14.709	3.55736	11.6927	WT_rep2_peak_456
chr1	158073392	158073840	449	158073539	1056.55	819.411	14.8951	814.812	WT_rep2_peak_457
chr1	158074047	158074417	371	158074278	1202.11	981.914	16.4809	977.189	WT_rep2_peak_458
chr1	158123325	158123475	151	158123372	74.23	27.607	4.70159	24.4402	WT_rep2_peak_459
chr1	158183153	158183465	313	158183367	111.92	48.4393	5.80556	45.1104	WT_rep2_peak_460
chr1	158516046	158517102	1057	158516292	966.67	605.659	10.2944	601.245	WT_rep2_peak_461
chr1	158517473	158517628	156	158517503	91.62	26.6817	3.85925	23.5236	WT_rep2_peak_462
chr1	159401094	159401260	167	159401201	99.16	36.4573	4.76955	33.2122	WT_rep2_peak_463
chr1	159585034	159585532	499	159585305	53.35	13.1415	3.19703	10.1502	WT_rep2_peak_464
chr1	159677593	159678040	448	159677935	226.16	44.5707	2.98889	41.2662	WT_rep2_peak_465
chr1	159679534	159679992	459	159679655	377.51	180.357	6.88193	176.545	WT_rep2_peak_466
chr1	159751871	159752049	179	159751977	60.89	20.3195	4.23137	17.2272	WT_rep2_peak_467
chr1	159753641	159755032	1392	159753845	345.03	186.463	8.04727	182.637	WT_rep2_peak_468
chr1	160051593	160052086	494	160051938	510.88	487.389	22.2557	483.096	WT_rep2_peak_469
chr1	160054055	160054298	244	160054181	230.79	92.422	5.51893	88.8769	WT_rep2_peak_470
chr1	160847077	160847555	479	160847439	259.21	227.542	17.7909	223.625	WT_rep2_peak_471
chr1	160859486	160859774	289	160859581	156.57	105.852	10.7732	102.257	WT_rep2_peak_472
chr1	160978476	160978780	305	160978739	44.07	10.7979	3.08159	7.84597	WT_rep2_peak_473
chr1	161645876	161646407	532	161646085	729.5	952.842	49.9451	948.137	WT_rep2_peak_474
chr1	161661823	161661983	161	161661934	52.19	15.3017	3.63666	12.2754	WT_rep2_peak_475
chr1	161662138	161662524	387	161662285	80.02	34.7183	5.53974	31.4876	WT_rep2_peak_476
chr1	161798179	161798330	152	161798321	85.82	37.8214	5.78822	34.5689	WT_rep2_peak_477
chr1	161798783	161799014	232	161798926	103.22	53.8959	7.12565	50.5313	WT_rep2_peak_478
chr1	162476220	162476750	531	162476368	93.36	45.2563	6.45164	41.9463	WT_rep2_peak_479
chr1	162532551	162533846	1296	162532974	361.27	142.585	5.48893	138.874	WT_rep2_peak_480
chr1	162534005	162534154	150	162534077	139.17	23.2732	2.64477	20.1494	WT_rep2_peak_481
chr1	162537127	162537342	216	162537245	130.47	51.1953	5.23073	47.8496	WT_rep2_peak_482
chr1	162537884	162538284	401	162538089	851.85	101.482	2.30501	97.9033	WT_rep2_peak_483
chr1	163779772	163780003	232	163779908	95.68	46.949	6.61023	43.6283	WT_rep2_peak_484
chr1	164107795	164108116	322	164107925	119.46	49.1966	5.4753	45.8636	WT_rep2_peak_485
chr1	164265830	164266007	178	164265904	1304.75	287.938	3.33098	283.914	WT_rep2_peak_486
chr1	165138012	165138543	532	165138407	203.54	112.928	8.18161	109.31	WT_rep2_peak_487
chr1	165144679	165144865	187	165144788	84.08	37.8714	5.81728	34.6154	WT_rep2_peak_488
chr1	165146230	165146418	189	165146312	180.34	132.124	12.3988	128.443	WT_rep2_peak_489
chr1	165148994	165149982	989	165149216	472.03	389.153	16.3113	384.978	WT_rep2_peak_490
chr1	165421060	165421237	178	165421110	53.35	15.9023	3.71595	12.8665	WT_rep2_peak_491
chr1	165702940	165703332	393	165703085	309.08	293.58	21.2006	289.546	WT_rep2_peak_492
chr1	166138389	166140262	1874	166139639	1025.82	1472.77	68.0013	1467.76	WT_rep2_peak_493
chr1	166142114	166142265	152	166142211	64.37	17.0035	3.44039	13.9582	WT_rep2_peak_494
chr1	166226044	166227121	1078	166226770	142.65	70.1597	6.84058	66.7109	WT_rep2_peak_495
chr1	166832613	166832961	349	166832818	70.75	17.0235	3.26119	13.9781	WT_rep2_peak_496
chr1	166906230	166907095	866	166906880	267.33	237.847	18.3459	233.91	WT_rep2_peak_497
chr1	166915422	166915603	182	166915536	127.58	76.2562	8.79085	72.7781	WT_rep2_peak_498
chr1	166915767	166916150	384	166916100	68.43	25.7859	4.74679	22.6367	WT_rep2_peak_499
chr1	167053759	167053988	230	167053844	131.63	78.7915	8.84229	75.3026	WT_rep2_peak_500
chr1	169761494	169761870	377	169761694	75.97	30.8968	5.26221	27.697	WT_rep2_peak_501
chr1	169994277	169994514	238	169994379	69.01	26.4981	4.78644	23.3411	WT_rep2_peak_502
chr1	170143192	170144571	1380	170143969	520.16	128.854	3.5942	125.184	WT_rep2_peak_503
chr1	170146010	170146321	312	170146201	367.07	153.34	5.84235	149.598	WT_rep2_peak_504
chr1	170496497	170496736	240	170496669	44.65	10.7979	3.12124	7.84597	WT_rep2_peak_505
chr1	170509555	170509899	345	170509704	257.47	208.013	15.2041	204.138	WT_rep2_peak_506
chr1	170537421	170537585	165	170537479	115.4	63.6046	7.75983	60.1886	WT_rep2_peak_507
chr1	171001195	171001344	150	171001246	62.05	17.0287	3.50266	13.9832	WT_rep2_peak_508
chr1	171045506	171045782	277	171045634	115.4	64.8078	7.95825	61.3834	WT_rep2_peak_509
chr1	171168614	171168866	253	171168719	50.45	14.1246	3.51771	11.1181	WT_rep2_peak_510
chr1	171169851	171170111	261	171169983	91.04	43.5819	6.29305	40.2843	WT_rep2_peak_511
chr1	171245563	171246220	658	171246001	242.39	203.306	16.2262	199.441	WT_rep2_peak_512
chr1	171291187	171291440	254	171291311	82.92	36.2845	5.73798	33.0401	WT_rep2_peak_513
chr1	171893952	171894265	314	171894147	114.82	62.6857	7.72117	59.2748	WT_rep2_peak_514
chr1	172022215	172022368	154	172022318	212.82	32.7643	2.57613	29.5508	WT_rep2_peak_515
chr1	172101623	172101796	174	172101684	2248.22	387.713	2.83277	383.54	WT_rep2_peak_516
chr1	172148883	172149321	439	172149013	165.85	78.505	6.6026	75.017	WT_rep2_peak_517
chr1	172150163	172150522	360	172150388	140.33	38.1001	3.71928	34.843	WT_rep2_peak_518
chr1	172153101	172153350	250	172153239	147.29	69.2142	6.44744	65.7704	WT_rep2_peak_519
chr1	172196817	172197477	661	172197138	161.79	54.0463	4.5219	50.6813	WT_rep2_peak_520
chr1	172197672	172198426	755	172197891	419.26	325.396	14.4917	321.314	WT_rep2_peak_521
chr1	172199019	172199626	608	172199486	821.12	980.12	39.1486	975.396	WT_rep2_peak_522
chr1	172199796	172199946	151	172199917	63.79	12.9053	2.86671	9.92202	WT_rep2_peak_523
chr1	172200286	172200703	418	172200483	114.82	19.8388	2.69343	16.7536	WT_rep2_peak_524
chr1	174330297	174330501	205	174330352	88.14	20.0994	3.14992	17.0128	WT_rep2_peak_525
chr1	174436047	174436686	640	174436350	306.18	187.435	9.59938	183.606	WT_rep2_peak_526
chr1	174663609	174663919	311	174663775	342.13	339.121	23.4605	335.02	WT_rep2_peak_527
chr1	174886855	174887081	227	174886984	55.67	17.127	3.87454	14.0756	WT_rep2_peak_528
chr1	176562624	176562989	366	176562702	41.75	9.25841	2.923	6.33707	WT_rep2_peak_529
chr1	176563209	176563555	347	176563298	104.38	43.967	5.5463	40.668	WT_rep2_peak_530
chr1	176577596	176577775	180	176577693	75.39	30.8968	5.22256	27.697	WT_rep2_peak_531
chr1	176582737	176583365	629	176583026	269.07	101.838	5.1936	98.2575	WT_rep2_peak_532
chr1	176583550	176584367	818	176584227	225	37.1559	2.69043	33.9062	WT_rep2_peak_533
chr1	176602132	176602464	333	176602319	74.81	11.4236	2.44534	8.46048	WT_rep2_peak_534
chr1	177274567	177276386	1820	177275533	5038.06	4374.28	18.9438	4368.32	WT_rep2_peak_535
chr1	177277375	177277726	352	177277518	233.11	66.7795	3.96804	63.346	WT_rep2_peak_536
chr1	177811806	177811958	153	177811868	63.79	22.3198	4.42961	19.2056	WT_rep2_peak_537
chr1	177812103	177812262	160	177812246	56.25	17.7508	3.91419	14.6903	WT_rep2_peak_538
chr1	177812969	177813244	276	177813101	64.37	7.1702	2.04273	4.3031	WT_rep2_peak_539
chr1	177815378	177815652	275	177815506	103.22	37.5255	4.73727	34.2742	WT_rep2_peak_540
chr1	177926254	177926412	159	177926313	64.37	23.0001	4.46926	19.8778	WT_rep2_peak_541
chr1	177931446	177931604	159	177931517	83.5	37.0754	5.77763	33.8259	WT_rep2_peak_542
chr1	177971138	177971326	189	177971268	52.77	15.3017	3.67631	12.2754	WT_rep2_peak_543
chr1	178076926	178077139	214	178077069	70.17	27.2164	4.86573	24.0517	WT_rep2_peak_544
chr1	178156833	178157070	238	178156963	165.27	39.5678	3.39322	36.2984	WT_rep2_peak_545
chr1	178157786	178157936	151	178157879	171.07	26.8235	2.56816	23.6648	WT_rep2_peak_546
chr1	178742550	178742725	176	178742687	54.51	16.5108	3.79525	13.4685	WT_rep2_peak_547
chr1	178759780	178760224	445	178759874	96.84	47.8022	6.68953	44.4753	WT_rep2_peak_548
chr1	179437584	179438134	551	179437915	541.61	614.99	33.5984	610.566	WT_rep2_peak_549
chr1	179452628	179453094	467	179452796	212.82	169.272	14.619	165.488	WT_rep2_peak_550
chr1	179580334	179580688	355	179580558	94.52	33.001	4.54864	29.7864	WT_rep2_peak_551
chr1	179581054	179581415	362	179581278	295.74	274.71	20.2887	270.708	WT_rep2_peak_552
chr1	179788474	179788648	175	179788600	238.33	34.5931	2.49306	31.3666	WT_rep2_peak_553
chr1	179971966	179972450	485	179972109	207.02	99.1026	6.71031	95.5322	WT_rep2_peak_554
chr1	179989518	179990023	506	179989830	221.52	49.6037	3.27231	46.2662	WT_rep2_peak_555
chr1	180160416	180161482	1067	180161097	187.3	140.055	12.8746	136.35	WT_rep2_peak_556
chr1	180264437	180265275	839	180264875	4800.3	6220.93	52.0749	6214.67	WT_rep2_peak_557
chr1	180574308	180574625	318	180574484	155.41	103.117	10.4273	99.5318	WT_rep2_peak_558
chr1	180579643	180579807	165	180579703	78.86	33.1733	5.46045	29.9546	WT_rep2_peak_559
chr1	180579957	180580106	150	180579961	38.85	7.80868	2.72476	4.91926	WT_rep2_peak_560
chr1	180690029	180690266	238	180690166	236.59	152.832	10.3302	149.092	WT_rep2_peak_561
chr1	180693615	180693835	221	180693702	86.98	39.4785	6.01552	36.2095	WT_rep2_peak_562
chr1	181004889	181005516	628	181005119	1540.76	1968.93	48.7898	1963.68	WT_rep2_peak_563
chr1	181008891	181009040	150	181009018	153.67	102.675	10.575	99.0906	WT_rep2_peak_564
chr1	181286768	181287934	1167	181287530	419.84	450.54	28.7733	446.289	WT_rep2_peak_565
chr1	181724079	181724228	150	181724215	47.55	12.4216	3.31948	9.44188	WT_rep2_peak_566
chr1	181730675	181731047	373	181730812	120.62	69.5159	8.31508	66.069	WT_rep2_peak_567
chr1	181732968	181733577	610	181733324	886.07	761.023	18.1034	756.472	WT_rep2_peak_568
chr1	181734002	181734151	150	181734094	99.74	50.388	6.88776	47.045	WT_rep2_peak_569
chr1	181749477	181750045	569	181749615	141.49	74.0507	7.38302	70.584	WT_rep2_peak_570
chr1	182103992	182104540	549	182104453	116.56	65.7421	8.03755	62.3139	WT_rep2_peak_571
chr1	182106553	182107119	567	182106687	152.51	101.621	10.4957	98.0412	WT_rep2_peak_572
chr1	182144158	182144826	669	182144590	287.62	135.534	6.71218	131.843	WT_rep2_peak_573
chr1	182275909	182276575	667	182276290	97.42	48.6597	6.72917	45.3284	WT_rep2_peak_574
chr1	182289255	182289437	183	182289295	47.55	12.4216	3.31948	9.44188	WT_rep2_peak_575
chr1	182317471	182318070	600	182317766	78.86	33.1733	5.46045	29.9546	WT_rep2_peak_576
chr1	182318258	182318440	183	182318368	114.82	63.8772	7.9186	60.458	WT_rep2_peak_577
chr1	182320160	182320869	710	182320764	823.44	1117.91	56.368	1113.1	WT_rep2_peak_578
chr1	182321162	182321405	244	182321257	49.87	13.5484	3.47807	10.5486	WT_rep2_peak_579
chr1	182722695	182723497	803	182723248	830.4	974.99	37.5349	970.27	WT_rep2_peak_580
chr1	182867977	182868181	205	182868122	129.31	78.2128	8.90979	74.7256	WT_rep2_peak_581
chr1	183103832	183104215	384	183103913	97.42	48.6597	6.72917	45.3284	WT_rep2_peak_582
chr1	183138720	183139279	560	183138779	265.01	75.6495	3.97027	72.1743	WT_rep2_peak_583
chr1	183139654	183140138	485	183139781	60.89	11.3807	2.72036	8.418	WT_rep2_peak_584
chr1	183140340	183140489	150	183140350	70.75	17.0235	3.26119	13.9781	WT_rep2_peak_585
chr1	184629747	184629898	152	184629757	36.53	6.89518	2.56617	4.0308	WT_rep2_peak_586
chr1	184630583	184631079	497	184630826	202.38	157.424	13.9054	153.671	WT_rep2_peak_587
chr1	185088667	185089113	447	185088832	63.79	22.3198	4.42961	19.2056	WT_rep2_peak_588
chr1	185139650	185139938	289	185139791	139.17	29.9929	3.11495	26.805	WT_rep2_peak_589
chr1	185196558	185197148	591	185196696	169.33	119.9	11.6455	116.257	WT_rep2_peak_590
chr1	186356643	186357854	1212	186357002	604.82	741.619	41.4209	737.084	WT_rep2_peak_591
chr1	186958091	186958308	218	186958226	291.68	136.343	6.65189	132.65	WT_rep2_peak_592
chr1	187082088	187082237	150	187082091	57.41	18.3821	3.99349	15.3128	WT_rep2_peak_593
chr1	187943234	187943442	209	187943331	73.65	29.4072	5.10362	26.2221	WT_rep2_peak_594
chr1	187943806	187944054	249	187943906	169.33	119.9	11.6455	116.257	WT_rep2_peak_595
chr1	187944669	187944818	150	187944707	42.33	9.76189	2.96265	6.8289	WT_rep2_peak_596
chr1	188704372	188704778	407	188704639	347.35	205.291	9.16716	201.422	WT_rep2_peak_597
chr1	188941922	188942142	221	188942030	82.92	36.2845	5.73798	33.0401	WT_rep2_peak_598
chr1	189075376	189075592	217	189075464	187.88	95.4137	7.26474	91.8566	WT_rep2_peak_599
chr1	189854762	189855004	243	189854910	53.93	13.1415	3.23115	10.1502	WT_rep2_peak_600
chr1	189892805	189893602	798	189892871	212.24	91.2399	5.92329	87.7012	WT_rep2_peak_601
chr1	189893761	189894532	772	189894117	227.32	119.277	7.61052	115.637	WT_rep2_peak_602
chr1	190505173	190505819	647	190505674	216.88	125.204	8.71511	121.545	WT_rep2_peak_603
chr1	190532079	190532348	270	190532221	53.35	15.4258	3.62331	12.3982	WT_rep2_peak_604
chr1	190757310	190757459	150	190757409	48.71	12.9807	3.39877	9.99094	WT_rep2_peak_605
chr1	191084898	191085200	303	191085053	52.19	12.61	3.12881	9.62872	WT_rep2_peak_606
chr1	191510581	191510948	368	191510875	294.58	210.359	12.3159	206.478	WT_rep2_peak_607
chr1	191640879	191641941	1063	191641698	278.93	252.185	19.1389	248.221	WT_rep2_peak_608
chr1	191784915	191785354	440	191785234	52.19	15.3017	3.63666	12.2754	WT_rep2_peak_609
chr1	192188238	192189323	1086	192188409	410.56	371.441	19.5981	367.294	WT_rep2_peak_610
chr1	192528572	192529119	548	192529010	63.79	22.3198	4.42961	19.2056	WT_rep2_peak_611
chr1	192579303	192579859	557	192579715	255.15	205.599	15.0677	201.729	WT_rep2_peak_612
chr1	192612876	192613175	300	192613024	133.37	82.1656	9.18733	78.6613	WT_rep2_peak_613
chr1	192666048	192666677	630	192666349	146.13	95.3609	10.0596	91.8039	WT_rep2_peak_614
chr1	192856729	192856880	152	192856790	100.32	51.2586	6.92741	47.9099	WT_rep2_peak_615
chr1	194325866	194326761	896	194326152	89.3	28.1789	4.10466	25.0052	WT_rep2_peak_616
chr1	194494308	194495596	1289	194494688	402.44	373.063	20.5837	368.913	WT_rep2_peak_617
chr1	194496230	194497024	795	194496546	136.27	85.1642	9.38556	81.6477	WT_rep2_peak_618
chr1	194712349	194712508	160	194712449	63.21	16.4434	3.37935	13.4044	WT_rep2_peak_619
chr1	194718385	194718670	286	194718531	181.5	66.1133	4.93256	62.6838	WT_rep2_peak_620
chr1	194779209	194779681	473	194779544	117.72	66.6801	8.11684	63.2469	WT_rep2_peak_621
chr1	194780754	194780992	239	194780902	99.74	50.388	6.88776	47.045	WT_rep2_peak_622
chr10	3907831	3908083	253	3907973	119.46	68.567	8.23578	65.1252	WT_rep2_peak_623
chr10	3913449	3914256	808	3913550	95.1	46.949	6.57058	43.6283	WT_rep2_peak_624
chr10	4306535	4306789	255	4306677	138.59	87.179	9.54415	83.6549	WT_rep2_peak_625
chr10	4318313	4318820	508	4318636	105.54	55.6748	7.28424	52.3006	WT_rep2_peak_626
chr10	4377301	4377454	154	4377355	55.67	17.127	3.87454	14.0756	WT_rep2_peak_627
chr10	4403660	4403997	338	4403795	52.19	15.3017	3.63666	12.2754	WT_rep2_peak_628
chr10	4970493	4970930	438	4970811	92.78	44.4168	6.41199	41.1129	WT_rep2_peak_629
chr10	4971101	4972213	1113	4971638	1045.54	1235.59	38.6176	1230.7	WT_rep2_peak_630
chr10	5178813	5179020	208	5178957	179.76	58.1196	4.40353	54.7323	WT_rep2_peak_631
chr10	5179443	5179718	276	5179574	88.14	22.1301	3.38303	19.0212	WT_rep2_peak_632
chr10	5218446	5218603	158	5218519	41.75	7.32449	2.51481	4.45579	WT_rep2_peak_633
chr10	5287104	5287253	150	5287124	92.2	17.8022	2.8243	14.7414	WT_rep2_peak_634
chr10	5288834	5289193	360	5289075	236.01	85.0654	4.91221	81.5509	WT_rep2_peak_635
chr10	5782176	5782390	215	5782268	222.68	134.674	9.31985	130.986	WT_rep2_peak_636
chr10	5782828	5783194	367	5782957	118.3	60.3426	7.01746	56.9423	WT_rep2_peak_637
chr10	6839859	6840270	412	6840008	122.36	71.4243	8.43402	67.9677	WT_rep2_peak_638
chr10	7499354	7499708	355	7499628	255.15	132.466	7.53383	128.784	WT_rep2_peak_639
chr10	7577833	7578837	1005	7578706	245.29	176.572	12.3146	172.769	WT_rep2_peak_640
chr10	7581158	7581758	601	7581320	173.39	124.31	11.923	120.654	WT_rep2_peak_641
chr10	7586115	7586264	150	7586233	46.97	11.8714	3.27983	8.89882	WT_rep2_peak_642
chr10	7588319	7588774	456	7588630	182.08	134.378	12.5177	130.691	WT_rep2_peak_643
chr10	7696678	7697030	353	7696821	148.45	37.9438	3.55836	34.6875	WT_rep2_peak_644
chr10	7781751	7782162	412	7782074	60.89	10.4298	2.57867	7.48778	WT_rep2_peak_645
chr10	7782697	7783214	518	7782839	149.61	82.2283	7.92688	78.7238	WT_rep2_peak_646
chr10	7787227	7787408	182	7787312	105.54	55.6748	7.28424	52.3006	WT_rep2_peak_647
chr10	7794935	7796367	1433	7795946	516.68	551.327	28.7599	546.968	WT_rep2_peak_648
chr10	8083205	8083379	175	8083240	115.4	24.5238	3.06309	21.387	WT_rep2_peak_649
chr10	8600665	8601492	828	8601151	241.81	204.751	16.6014	200.882	WT_rep2_peak_650
chr10	8605400	8605996	597	8605509	144.97	49.0179	4.56161	45.6855	WT_rep2_peak_651
chr10	9485766	9485915	150	9485806	62.63	12.9464	2.89217	9.96287	WT_rep2_peak_652
chr10	9500154	9500313	160	9500201	89.3	18.985	3.01009	15.9122	WT_rep2_peak_653
chr10	9504485	9504851	367	9504623	70.75	27.2164	4.90538	24.0517	WT_rep2_peak_654
chr10	9635928	9636824	897	9636413	1054.23	1392.42	52.7617	1387.45	WT_rep2_peak_655
chr10	10563538	10564754	1217	10564595	243.55	169.346	11.6454	165.561	WT_rep2_peak_656
chr10	10564972	10565145	174	10565073	125.84	58.6793	6.37364	55.289	WT_rep2_peak_657
chr10	10565323	10565597	275	10565465	56.25	13.7057	3.1805	10.7047	WT_rep2_peak_658
chr10	10812238	10812415	178	10812324	153.09	102.675	10.5353	99.0906	WT_rep2_peak_659
chr10	10955555	10956282	728	10955765	315.46	213.689	11.3021	209.802	WT_rep2_peak_660
chr10	11027333	11027946	614	11027699	223.84	182.54	15.3724	178.723	WT_rep2_peak_661
chr10	11040101	11040376	276	11040245	103.22	53.8959	7.12565	50.5313	WT_rep2_peak_662
chr10	11166781	11166973	193	11166858	52.77	15.3017	3.67631	12.2754	WT_rep2_peak_663
chr10	11333072	11333308	237	11333196	47.55	12.4216	3.31948	9.44188	WT_rep2_peak_664
chr10	12884585	12884801	217	12884699	67.27	25.0799	4.6675	21.9363	WT_rep2_peak_665
chr10	13089555	13089874	320	13089673	418.1	365.505	18.2217	361.366	WT_rep2_peak_666
chr10	13390851	13391216	366	13390926	111.34	61.1081	7.68072	57.7031	WT_rep2_peak_667
chr10	14003103	14003634	532	14003406	1482.77	1451.32	24.3841	1446.31	WT_rep2_peak_668
chr10	14004470	14004767	298	14004618	436.07	163.141	5.20327	159.374	WT_rep2_peak_669
chr10	14007326	14007735	410	14007630	242.97	88.2358	4.99432	84.7074	WT_rep2_peak_670
chr10	14019086	14019383	298	14019315	215.72	59.5879	3.85619	56.1923	WT_rep2_peak_671
chr10	14024710	14025571	862	14025306	3971.06	6184.27	94.573	6178.02	WT_rep2_peak_672
chr10	14026579	14026839	261	14026796	433.18	88.9643	3.12356	85.4342	WT_rep2_peak_673
chr10	17600207	17600534	328	17600426	189.04	129.878	11.1462	126.206	WT_rep2_peak_674
chr10	17790783	17791802	1020	17791506	286.46	167.791	8.98325	164.011	WT_rep2_peak_675
chr10	18401796	18402272	477	18401937	200.64	155.079	13.7865	151.333	WT_rep2_peak_676
chr10	18407304	18408036	733	18407573	903.46	832.454	21.034	827.844	WT_rep2_peak_677
chr10	18464959	18465625	667	18465262	252.25	184.407	12.6625	180.585	WT_rep2_peak_678
chr10	18467007	18467347	341	18467260	122.94	26.1577	3.0984	23.0064	WT_rep2_peak_679
chr10	18522036	18522597	562	18522299	157.15	67.9164	5.85738	64.4774	WT_rep2_peak_680
chr10	18877660	18877911	252	18877667	33.63	5.60964	2.36793	2.78141	WT_rep2_peak_681
chr10	18878123	18878351	229	18878261	70.17	27.2164	4.86573	24.0517	WT_rep2_peak_682
chr10	19485122	19485540	419	19485257	85.24	38.6725	5.89657	35.4099	WT_rep2_peak_683
chr10	20017248	20017596	349	20017565	72.49	28.671	5.02432	25.4931	WT_rep2_peak_684
chr10	20155803	20155952	150	20155925	48.71	8.90178	2.61634	5.99084	WT_rep2_peak_685
chr10	20200960	20201424	465	20201189	405.34	243.595	9.44979	239.648	WT_rep2_peak_686
chr10	20215334	20215596	263	20215512	252.25	25.0391	2.07583	21.8998	WT_rep2_peak_687
chr10	20273944	20274094	151	20273962	76.55	31.6501	5.30186	28.4452	WT_rep2_peak_688
chr10	20275674	20275915	242	20275818	318.36	305.856	21.8349	301.803	WT_rep2_peak_689
chr10	22581468	22581696	229	22581610	97.42	48.6597	6.72917	45.3284	WT_rep2_peak_690
chr10	25046602	25047148	547	25046800	234.27	139.019	9.04901	135.318	WT_rep2_peak_691
chr10	25868750	25869722	973	25868960	167.01	117.71	11.4869	114.075	WT_rep2_peak_692
chr10	26151276	26151453	178	26151384	70.75	27.2164	4.90538	24.0517	WT_rep2_peak_693
chr10	29020005	29020194	190	29020079	51.03	14.709	3.55736	11.6927	WT_rep2_peak_694
chr10	29026148	29026297	150	29026252	131.05	15.6668	2.20091	12.6378	WT_rep2_peak_695
chr10	29056815	29057015	201	29056927	128.15	77.2328	8.8305	73.7501	WT_rep2_peak_696
chr10	29072176	29072539	364	29072418	273.71	161.501	9.08121	157.737	WT_rep2_peak_697
chr10	29073060	29073258	199	29073120	130.47	16.4195	2.2668	13.3807	WT_rep2_peak_698
chr10	29079397	29079572	176	29079445	74.23	30.1491	5.14327	26.9565	WT_rep2_peak_699
chr10	29088935	29089167	233	29089072	57.41	13.2259	3.07415	10.234	WT_rep2_peak_700
chr10	29092141	29092430	290	29092224	59.15	19.6665	4.11243	16.5826	WT_rep2_peak_701
chr10	29094050	29094236	187	29094148	355.47	223.466	10.084	219.559	WT_rep2_peak_702
chr10	29100300	29101272	973	29100465	1071.63	1131.98	28.99	1127.16	WT_rep2_peak_703
chr10	29103175	29103625	451	29103462	362.43	367.402	24.8481	363.26	WT_rep2_peak_704
chr10	29220491	29220785	295	29220697	65.53	23.6869	4.54855	20.5589	WT_rep2_peak_705
chr10	29222729	29223711	983	29223230	734.72	695.987	22.2271	691.489	WT_rep2_peak_706
chr10	29330192	29330344	153	29330300	70.17	21.8344	3.95368	18.7269	WT_rep2_peak_707
chr10	29411364	29411525	162	29411465	78.28	33.1733	5.4208	29.9546	WT_rep2_peak_708
chr10	30523258	30523658	401	30523395	159.47	109.054	10.9715	105.448	WT_rep2_peak_709
chr10	30554809	30555108	300	30555024	49.87	13.5484	3.47807	10.5486	WT_rep2_peak_710
chr10	30565840	30565998	159	30565874	74.23	22.9496	3.95924	19.8319	WT_rep2_peak_711
chr10	30566826	30567620	795	30567175	748.05	597.519	15.6053	593.113	WT_rep2_peak_712
chr10	30709236	30709780	545	30709382	205.28	160.956	14.1036	157.194	WT_rep2_peak_713
chr10	31378294	31378482	189	31378402	51.03	14.709	3.55736	11.6927	WT_rep2_peak_714
chr10	31566918	31567145	228	31567060	106.12	56.5704	7.32389	53.1907	WT_rep2_peak_715
chr10	32055294	32055706	413	32055575	54.51	16.5108	3.79525	13.4685	WT_rep2_peak_716
chr10	32056023	32056172	150	32056097	56.25	17.7508	3.91419	14.6903	WT_rep2_peak_717
chr10	32148677	32148898	222	32148756	60.89	20.3195	4.23137	17.2272	WT_rep2_peak_718
chr10	32149406	32149555	150	32149509	47.55	12.4216	3.31948	9.44188	WT_rep2_peak_719
chr10	32150192	32150790	599	32150695	71.33	21.1023	3.80663	18.0032	WT_rep2_peak_720
chr10	32175521	32175740	220	32175603	48.71	12.9807	3.39877	9.99094	WT_rep2_peak_721
chr10	32488811	32489020	210	32488932	66.11	24.3802	4.5882	21.2442	WT_rep2_peak_722
chr10	32556495	32556729	235	32556595	136.85	67.6982	6.89266	64.2599	WT_rep2_peak_723
chr10	32598772	32599067	296	32598891	86.4	34.0435	5.08158	30.8191	WT_rep2_peak_724
chr10	32603797	32604139	343	32603993	103.8	53.8959	7.1653	50.5313	WT_rep2_peak_725
chr10	32606272	32606888	617	32606407	160.05	110.126	11.0111	106.516	WT_rep2_peak_726
chr10	32653492	32654328	837	32653556	46.39	11.8714	3.24018	8.89882	WT_rep2_peak_727
chr10	32753626	32754214	589	32753997	39.43	8.28157	2.76441	5.38395	WT_rep2_peak_728
chr10	32767095	32767258	164	32767178	46.97	11.8714	3.27983	8.89882	WT_rep2_peak_729
chr10	33389059	33389353	295	33389205	69.01	26.4981	4.78644	23.3411	WT_rep2_peak_730
chr10	33498590	33499199	610	33498978	529.44	358.754	11.5312	354.625	WT_rep2_peak_731
chr10	33825065	33825414	350	33825136	134.53	83.1619	9.26662	79.654	WT_rep2_peak_732
chr10	34028594	34028891	298	34028755	45.23	11.3301	3.16089	8.36762	WT_rep2_peak_733
chr10	34158478	34160201	1724	34158841	1419.56	954.156	11.5964	949.451	WT_rep2_peak_734
chr10	34174788	34175397	610	34175091	3032.81	3901.16	50.6056	3895.29	WT_rep2_peak_735
chr10	37011066	37011289	224	37011167	55.67	15.3735	3.54182	12.3464	WT_rep2_peak_736
chr10	37011817	37012489	673	37012075	2342.16	2901.21	45.0608	2895.63	WT_rep2_peak_737
chr10	39439935	39440154	220	39440008	169.33	79.1243	6.46402	75.6346	WT_rep2_peak_738
chr10	39498007	39498307	301	39498202	57.41	18.3821	3.99349	15.3128	WT_rep2_peak_739
chr10	39697664	39699101	1438	39698615	106.12	37.9053	4.65736	34.6492	WT_rep2_peak_740
chr10	39700559	39700982	424	39700838	160.05	110.126	11.0111	106.516	WT_rep2_peak_741
chr10	39703750	39704526	777	39704399	60.31	20.3195	4.19172	17.2272	WT_rep2_peak_742
chr10	39706749	39706901	153	39706829	109.6	59.2812	7.56177	55.8868	WT_rep2_peak_743
chr10	39767232	39768087	856	39767519	125.26	74.3131	8.63226	70.8436	WT_rep2_peak_744
chr10	40125428	40125867	440	40125722	115.98	42.4641	4.87406	39.1755	WT_rep2_peak_745
chr10	40177922	40178093	172	40177967	131.05	48.4694	4.8909	45.1404	WT_rep2_peak_746
chr10	40225446	40225693	248	40225565	161.79	68.8563	5.81387	65.4135	WT_rep2_peak_747
chr10	40355698	40356587	890	40356008	216.88	174.069	14.8966	170.272	WT_rep2_peak_748
chr10	41327463	41328041	579	41327800	175.71	126.53	12.0816	122.867	WT_rep2_peak_749
chr10	41404579	41404904	326	41404828	77.12	32.409	5.34151	29.1972	WT_rep2_peak_750
chr10	41686926	41687267	342	41687126	75.39	30.8968	5.22256	27.697	WT_rep2_peak_751
chr10	41783401	41783883	483	41783620	109.6	59.2812	7.56177	55.8868	WT_rep2_peak_752
chr10	42061863	42062440	578	42062291	286.46	251.351	17.9665	247.389	WT_rep2_peak_753
chr10	42072462	42072964	503	42072601	621.64	769.733	42.5706	765.174	WT_rep2_peak_754
chr10	42439054	42439413	360	42439317	124.68	73.3467	8.59261	69.882	WT_rep2_peak_755
chr10	42690937	42691123	187	42691052	205.86	92.5118	6.26848	88.9664	WT_rep2_peak_756
chr10	42878758	42880539	1782	42879936	712.68	923.531	48.7953	918.849	WT_rep2_peak_757
chr10	42897006	42897494	489	42897154	517.26	533.269	26.4418	528.929	WT_rep2_peak_758
chr10	42897938	42899016	1079	42898380	277.77	39.7191	2.48898	36.4491	WT_rep2_peak_759
chr10	43033916	43034065	150	43034045	74.23	18.1199	3.27067	15.0573	WT_rep2_peak_760
chr10	43387814	43388197	384	43387954	73.07	29.4072	5.06397	26.2221	WT_rep2_peak_761
chr10	43408802	43409159	358	43409012	112.5	62.0273	7.76001	58.6183	WT_rep2_peak_762
chr10	44239235	44239384	150	44239299	38.85	7.80868	2.72476	4.91926	WT_rep2_peak_763
chr10	45034615	45034898	284	45034757	122.94	71.4243	8.47367	67.9677	WT_rep2_peak_764
chr10	45193864	45194121	258	45194010	81.76	35.4988	5.65869	32.261	WT_rep2_peak_765
chr10	48975938	48976304	367	48976244	55.67	17.127	3.87454	14.0756	WT_rep2_peak_766
chr10	48976610	48977366	757	48977021	252.83	215.799	16.922	211.907	WT_rep2_peak_767
chr10	50494133	50494282	150	50494221	55.09	17.127	3.8349	14.0756	WT_rep2_peak_768
chr10	52195773	52196060	288	52195917	63.21	22.3198	4.38996	19.2056	WT_rep2_peak_769
chr10	52312753	52312981	229	52312845	70.75	20.4983	3.77611	17.4048	WT_rep2_peak_770
chr10	52314552	52314847	296	52314673	56.25	10.9532	2.72614	8.00005	WT_rep2_peak_771
chr10	53224657	53225280	624	53224799	368.23	375.98	25.2446	371.825	WT_rep2_peak_772
chr10	53950533	53950842	310	53950671	440.71	232.724	7.88775	228.797	WT_rep2_peak_773
chr10	56263779	56263958	180	56263920	674.99	225.594	4.69436	221.682	WT_rep2_peak_774
chr10	56264256	56265125	870	56264874	1618.46	1935.64	40.4866	1930.41	WT_rep2_peak_775
chr10	56265856	56266443	588	56266192	181.5	67.9086	5.06957	64.4696	WT_rep2_peak_776
chr10	58105064	58107058	1995	58106621	263.27	219.066	16.065	215.168	WT_rep2_peak_777
chr10	58117120	58117269	150	58117180	86.4	39.4785	5.97587	36.2095	WT_rep2_peak_778
chr10	58312515	58313755	1241	58312813	219.78	41.2377	2.90496	37.957	WT_rep2_peak_779
chr10	58314626	58315219	594	58314863	324.16	218.666	11.2123	214.768	WT_rep2_peak_780
chr10	58315581	58316237	657	58316098	410.56	383.788	20.9979	379.622	WT_rep2_peak_781
chr10	58318713	58318925	213	58318859	132.21	57.1069	5.79192	53.7252	WT_rep2_peak_782
chr10	58328598	58328951	354	58328805	82.34	29.3347	4.56679	26.1537	WT_rep2_peak_783
chr10	58329492	58329706	215	58329563	73.65	29.4072	5.10362	26.2221	WT_rep2_peak_784
chr10	58972801	58972986	186	58972891	55.09	17.127	3.8349	14.0756	WT_rep2_peak_785
chr10	59058872	59059248	377	59059102	87.56	40.2895	6.05516	37.0157	WT_rep2_peak_786
chr10	59733226	59733708	483	59733562	248.19	213.547	17.0376	209.66	WT_rep2_peak_787
chr10	59786047	59786503	457	59786320	131.05	54.6215	5.5485	51.2546	WT_rep2_peak_788
chr10	59967065	59967500	436	59967372	2135.72	958.751	6.52634	954.042	WT_rep2_peak_789
chr10	59970802	59970951	150	59970837	182.66	33.5127	2.84442	30.2926	WT_rep2_peak_790
chr10	60138163	60138312	150	60138223	251.67	26.9759	2.15222	23.8164	WT_rep2_peak_791
chr10	60204939	60205251	313	60205041	69.59	26.4981	4.82609	23.3411	WT_rep2_peak_792
chr10	61267359	61267517	159	61267448	59.73	12.3733	2.89183	9.39689	WT_rep2_peak_793
chr10	61416501	61416805	305	61416626	90.46	42.7516	6.2534	39.4605	WT_rep2_peak_794
chr10	61527082	61527245	164	61527148	57.41	18.3821	3.99349	15.3128	WT_rep2_peak_795
chr10	61528877	61529026	150	61528931	57.41	18.3821	3.99349	15.3128	WT_rep2_peak_796
chr10	62104985	62105684	700	62105223	224.42	55.4674	3.52213	52.0951	WT_rep2_peak_797
chr10	62265255	62265407	153	62265275	78.86	25.4922	4.2034	22.3463	WT_rep2_peak_798
chr10	62394893	62395397	505	62395115	310.82	97.5483	4.36111	93.9834	WT_rep2_peak_799
chr10	62472869	62473382	514	62473052	118.88	67.6217	8.19614	64.1836	WT_rep2_peak_800
chr10	62580572	62580721	150	62580612	53.93	15.9023	3.7556	12.8665	WT_rep2_peak_801
chr10	62582688	62582979	292	62582833	141.49	53.8122	5.08901	50.4507	WT_rep2_peak_802
chr10	62587524	62587736	213	62587650	190.2	143.488	13.0728	139.774	WT_rep2_peak_803
chr10	62588976	62589250	275	62589106	336.91	246.835	12.9967	242.882	WT_rep2_peak_804
chr10	62592305	62592586	282	62592446	182.66	88.3686	6.80238	84.8399	WT_rep2_peak_805
chr10	62595949	62596103	155	62595997	135.69	31.9056	3.33399	28.6996	WT_rep2_peak_806
chr10	63081595	63081746	152	63081613	57.99	18.3821	4.03313	15.3128	WT_rep2_peak_807
chr10	63156332	63156707	376	63156610	98.58	49.5217	6.80847	46.1845	WT_rep2_peak_808
chr10	63765692	63766088	397	63765942	69.01	26.4981	4.78644	23.3411	WT_rep2_peak_809
chr10	63923597	63923846	250	63923742	84.08	23.7706	3.69929	20.6419	WT_rep2_peak_810
chr10	63924367	63925043	677	63924911	74.81	30.1491	5.18292	26.9565	WT_rep2_peak_811
chr10	63925804	63925961	158	63925885	63.79	22.3198	4.42961	19.2056	WT_rep2_peak_812
chr10	67054704	67055577	874	67054898	205.28	114.794	8.2512	111.169	WT_rep2_peak_813
chr10	67062291	67062575	285	67062429	132.79	35.8806	3.7165	32.6412	WT_rep2_peak_814
chr10	67102993	67103399	407	67103257	316.04	303.118	21.6763	299.069	WT_rep2_peak_815
chr10	67103542	67103752	211	67103661	145.55	67.5605	6.37181	64.1247	WT_rep2_peak_816
chr10	67377009	67377159	151	67377082	67.27	25.0799	4.6675	21.9363	WT_rep2_peak_817
chr10	67383529	67383803	275	67383666	53.35	15.9023	3.71595	12.8665	WT_rep2_peak_818
chr10	67384076	67384225	150	67384097	68.43	21.4863	4.00153	18.3852	WT_rep2_peak_819
chr10	67745048	67745653	606	67745187	1300.11	536.586	5.88736	532.243	WT_rep2_peak_820
chr10	67928666	67928903	238	67928783	91.04	43.5819	6.29305	40.2843	WT_rep2_peak_821
chr10	67931863	67934642	2780	67932465	262.11	231.394	17.9891	227.47	WT_rep2_peak_822
chr10	67937775	67937924	150	67937884	46.97	11.8714	3.27983	8.89882	WT_rep2_peak_823
chr10	69369621	69370015	395	69369965	182.08	29.3368	2.61549	26.1558	WT_rep2_peak_824
chr10	69387039	69387583	545	69387237	78.86	33.1733	5.46045	29.9546	WT_rep2_peak_825
chr10	69467110	69467259	150	69467137	55.09	17.127	3.8349	14.0756	WT_rep2_peak_826
chr10	69524334	69524491	158	69524416	114.82	26.9621	3.30907	23.8026	WT_rep2_peak_827
chr10	69600798	69601048	251	69600916	84.66	37.8714	5.85693	34.6154	WT_rep2_peak_828
chr10	69822255	69822411	157	69822335	137.43	28.4797	3.03915	25.3047	WT_rep2_peak_829
chr10	69822654	69823074	421	69822969	147.87	23.8285	2.61407	20.6995	WT_rep2_peak_830
chr10	69823409	69824079	671	69823510	997.99	588.352	9.38455	583.955	WT_rep2_peak_831
chr10	69825362	69826438	1077	69825956	590.32	394.001	11.2741	389.82	WT_rep2_peak_832
chr10	69826922	69827376	455	69827059	469.71	41.7406	2.01157	38.458	WT_rep2_peak_833
chr10	69828001	69828255	255	69828145	218.62	43.3579	3.00846	40.0647	WT_rep2_peak_834
chr10	69837881	69838266	386	69838128	227.32	152.18	10.8722	148.441	WT_rep2_peak_835
chr10	69859779	69860560	782	69859959	568.29	325.284	8.87434	321.202	WT_rep2_peak_836
chr10	69860772	69861135	364	69860994	47.55	12.4216	3.31948	9.44188	WT_rep2_peak_837
chr10	69862687	69862836	150	69862831	84.66	9.88766	2.14159	6.9538	WT_rep2_peak_838
chr10	70028515	70028915	401	70028768	122.94	55.9772	6.1968	52.602	WT_rep2_peak_839
chr10	70394918	70395639	722	70395388	1266.47	987.462	15.089	982.734	WT_rep2_peak_840
chr10	71064143	71064549	407	71064275	207.02	155.237	13.0012	151.49	WT_rep2_peak_841
chr10	71091148	71091788	641	71091431	258.63	141.314	8.11342	137.606	WT_rep2_peak_842
chr10	71217095	71217797	703	71217526	357.21	310.923	17.9105	306.863	WT_rep2_peak_843
chr10	72133010	72133161	152	72133084	124.68	73.3467	8.59261	69.882	WT_rep2_peak_844
chr10	72510394	72510573	180	72510427	460.43	216.186	6.76584	212.293	WT_rep2_peak_845
chr10	74179648	74179829	182	74179767	347.35	185.176	7.91709	181.352	WT_rep2_peak_846
chr10	74481617	74481826	210	74481757	69.01	26.4981	4.78644	23.3411	WT_rep2_peak_847
chr10	74826715	74827029	315	74826846	190.2	53.8713	3.9021	50.5096	WT_rep2_peak_848
chr10	74827244	74827957	714	74827366	148.45	40.3192	3.73628	37.0454	WT_rep2_peak_849
chr10	74850699	74851268	570	74851149	225.58	122.682	8.00622	119.032	WT_rep2_peak_850
chr10	74851423	74851912	490	74851554	423.32	371.919	18.4486	367.771	WT_rep2_peak_851
chr10	75018191	75018453	263	75018313	500.44	427.973	17.6254	423.749	WT_rep2_peak_852
chr10	75145762	75146023	262	75145881	69.01	26.4981	4.78644	23.3411	WT_rep2_peak_853
chr10	75146865	75147016	152	75146899	103.8	53.8959	7.1653	50.5313	WT_rep2_peak_854
chr10	75874764	75875061	298	75874910	197.74	129.529	10.4601	125.858	WT_rep2_peak_855
chr10	75875436	75876025	590	75875883	117.14	66.6801	8.07719	63.2469	WT_rep2_peak_856
chr10	76225188	76225378	191	76225269	57.41	18.3821	3.99349	15.3128	WT_rep2_peak_857
chr10	76228381	76228558	178	76228487	191.36	144.637	13.1521	140.919	WT_rep2_peak_858
chr10	76545324	76545473	150	76545467	44.65	10.7979	3.12124	7.84597	WT_rep2_peak_859
chr10	77104643	77104897	255	77104882	35.95	6.4551	2.52652	3.59953	WT_rep2_peak_860
chr10	77130414	77130670	257	77130521	378.67	263.82	11.958	259.836	WT_rep2_peak_861
chr10	77157744	77158403	660	77157818	180.92	69.0393	5.19785	65.5961	WT_rep2_peak_862
chr10	77914479	77914732	254	77914610	103.8	53.8959	7.1653	50.5313	WT_rep2_peak_863
chr10	77998331	77998487	157	77998366	55.09	13.1772	3.11607	10.1856	WT_rep2_peak_864
chr10	78007335	78007677	343	78007524	541.61	639.285	37.0992	634.838	WT_rep2_peak_865
chr10	78007831	78007981	151	78007855	99.74	14.9186	2.45709	11.9002	WT_rep2_peak_866
chr10	78023307	78023754	448	78023608	234.27	70.1054	4.12762	66.6568	WT_rep2_peak_867
chr10	78025261	78025434	174	78025344	78.28	33.1733	5.4208	29.9546	WT_rep2_peak_868
chr10	78105254	78106057	804	78105724	241.81	204.751	16.6014	200.882	WT_rep2_peak_869
chr10	78109208	78109990	783	78109471	706.88	388.521	8.42717	384.348	WT_rep2_peak_870
chr10	78732291	78732441	151	78732360	68.43	25.7859	4.74679	22.6367	WT_rep2_peak_871
chr10	78901750	78901901	152	78901816	71.91	27.9407	4.98468	24.7685	WT_rep2_peak_872
chr10	78902841	78902990	150	78902974	46.97	11.8714	3.27983	8.89882	WT_rep2_peak_873
chr10	79474502	79475067	566	79474713	189.04	117.229	9.50215	113.596	WT_rep2_peak_874
chr10	79511666	79511932	267	79511808	189.04	142.341	12.9935	138.63	WT_rep2_peak_875
chr10	79523798	79524295	498	79523922	169.33	119.9	11.6455	116.257	WT_rep2_peak_876
chr10	79560161	79560551	391	79560290	310.82	180.254	8.90912	176.443	WT_rep2_peak_877
chr10	79571538	79571901	364	79571786	89.3	31.8946	4.60727	28.6888	WT_rep2_peak_878
chr10	79594414	79594814	401	79594524	153.09	92.9569	9.06412	89.4103	WT_rep2_peak_879
chr10	79746075	79746308	234	79746217	75.39	20.9531	3.63739	17.8572	WT_rep2_peak_880
chr10	79813007	79813159	153	79813103	125.84	49.6996	5.28481	46.3618	WT_rep2_peak_881
chr10	79952069	79952299	231	79952214	103.22	47.6614	6.13058	44.3382	WT_rep2_peak_882
chr10	79952476	79952708	233	79952586	148.45	97.4362	10.2182	93.8715	WT_rep2_peak_883
chr10	79960545	79960696	152	79960622	112.5	62.0273	7.76001	58.6183	WT_rep2_peak_884
chr10	79966492	79967288	797	79967009	737.62	565.197	14.4543	560.823	WT_rep2_peak_885
chr10	79967496	79967881	386	79967623	1921.16	1078.81	8.77701	1074.02	WT_rep2_peak_886
chr10	80068674	80068844	171	80068722	51.03	14.709	3.55736	11.6927	WT_rep2_peak_887
chr10	80123453	80123602	150	80123553	73.07	9.23276	2.1784	6.31882	WT_rep2_peak_888
chr10	80147450	80148261	812	80147682	200.64	132.667	10.6127	128.985	WT_rep2_peak_889
chr10	80148846	80149932	1087	80149226	263.85	160.059	9.45887	156.299	WT_rep2_peak_890
chr10	80150243	80150597	355	80150460	105.54	32.6198	4.09767	29.4069	WT_rep2_peak_891
chr10	80151400	80152499	1100	80151690	134.53	73.6501	7.81174	70.1844	WT_rep2_peak_892
chr10	80171354	80171563	210	80171423	49.29	13.5484	3.43842	10.5486	WT_rep2_peak_893
chr10	80217289	80217824	536	80217427	122.94	71.4243	8.47367	67.9677	WT_rep2_peak_894
chr10	80228424	80228819	396	80228683	185.56	41.9387	3.27592	38.652	WT_rep2_peak_895
chr10	80245705	80245873	169	80245799	426.8	460.992	29.249	456.728	WT_rep2_peak_896
chr10	80385279	80386037	759	80385961	103.22	13.3811	2.26565	10.3882	WT_rep2_peak_897
chr10	80419537	80419689	153	80419647	244.13	112.326	6.45085	108.709	WT_rep2_peak_898
chr10	80450913	80451468	556	80451286	62.63	21.6462	4.35032	18.5398	WT_rep2_peak_899
chr10	80470145	80470429	285	80470290	309.66	48.0924	2.61058	44.7646	WT_rep2_peak_900
chr10	80475848	80476025	178	80475984	165.27	29.4278	2.77113	26.2425	WT_rep2_peak_901
chr10	80626868	80627130	263	80626928	34.79	6.02649	2.44723	3.18431	WT_rep2_peak_902
chr10	80668803	80669286	484	80669194	59.73	19.6665	4.15208	16.5826	WT_rep2_peak_903
chr10	80670010	80670623	614	80670202	93.94	45.2563	6.49129	41.9463	WT_rep2_peak_904
chr10	80671182	80671409	228	80671299	59.73	19.6665	4.15208	16.5826	WT_rep2_peak_905
chr10	80767816	80767965	150	80767862	56.25	17.7508	3.91419	14.6903	WT_rep2_peak_906
chr10	80855937	80857100	1164	80856189	184.4	68.2405	5.01092	64.8008	WT_rep2_peak_907
chr10	80857384	80857533	150	80857461	69.59	17.7698	3.39358	14.7092	WT_rep2_peak_908
chr10	80857710	80857988	279	80857844	129.31	15.5022	2.20872	12.4741	WT_rep2_peak_909
chr10	80866600	80867324	725	80867178	132.79	81.1725	9.14768	77.6727	WT_rep2_peak_910
chr10	80880324	80880473	150	80880358	106.12	12.2582	2.14239	9.28258	WT_rep2_peak_911
chr10	80983838	80984395	558	80984249	1826.06	1587.83	18.8357	1582.76	WT_rep2_peak_912
chr10	80987725	80987874	150	80987811	78.86	27.0258	4.43692	23.866	WT_rep2_peak_913
chr10	80989613	80989948	336	80989800	118.3	67.6217	8.15649	64.1836	WT_rep2_peak_914
chr10	81040359	81040842	484	81040500	276.61	142.366	7.50286	138.655	WT_rep2_peak_915
chr10	81041697	81042321	625	81041998	305.6	189.766	9.84271	185.933	WT_rep2_peak_916
chr10	81098551	81098788	238	81098671	679.63	228.975	4.72658	225.056	WT_rep2_peak_917
chr10	81099741	81099892	152	81099799	48.13	11.383	3.04497	8.42027	WT_rep2_peak_918
chr10	81153717	81155007	1291	81154680	1060.61	767.207	13.1144	762.65	WT_rep2_peak_919
chr10	81155253	81155688	436	81155401	373.45	158.445	5.96253	154.69	WT_rep2_peak_920
chr10	81161819	81162019	201	81161944	58.57	19.0207	4.07278	15.9453	WT_rep2_peak_921
chr10	81199685	81200008	324	81199761	81.18	35.4988	5.61904	32.261	WT_rep2_peak_922
chr10	81202938	81203172	235	81203057	71.33	27.9407	4.94503	24.7685	WT_rep2_peak_923
chr10	81236178	81236920	743	81236843	208.18	164.508	14.3019	160.736	WT_rep2_peak_924
chr10	81295157	81295483	327	81295368	75.97	9.39931	2.199	6.47685	WT_rep2_peak_925
chr10	81295804	81297634	1831	81297409	1176.01	741.742	10.416	737.207	WT_rep2_peak_926
chr10	81478703	81479026	324	81478845	143.81	92.2701	9.90098	88.7253	WT_rep2_peak_927
chr10	81581800	81582118	319	81582093	44.65	10.7979	3.12124	7.84597	WT_rep2_peak_928
chr10	81944861	81945012	152	81944899	66.11	24.3802	4.5882	21.2442	WT_rep2_peak_929
chr10	82446884	82447188	305	82446987	45.23	11.3301	3.16089	8.36762	WT_rep2_peak_930
chr10	83027331	83027611	281	83027468	139.17	69.7419	6.93925	66.2943	WT_rep2_peak_931
chr10	83152250	83152399	150	83152333	57.99	18.3821	4.03313	15.3128	WT_rep2_peak_932
chr10	83201619	83201902	284	83201741	96.26	32.7436	4.42096	29.5302	WT_rep2_peak_933
chr10	83430124	83430449	326	83430219	77.7	32.409	5.38115	29.1972	WT_rep2_peak_934
chr10	83430597	83430746	150	83430679	52.19	15.3017	3.63666	12.2754	WT_rep2_peak_935
chr10	83436612	83436900	289	83436671	262.11	112.833	5.97975	109.215	WT_rep2_peak_936
chr10	84207158	84207315	158	84207256	208.76	146.131	11.6858	142.409	WT_rep2_peak_937
chr10	84209685	84210901	1217	84209889	328.22	319.624	22.5089	315.551	WT_rep2_peak_938
chr10	84363205	84363668	464	84363447	219.78	177.688	15.0948	173.882	WT_rep2_peak_939
chr10	84363930	84364140	211	84364003	57.41	18.3821	3.99349	15.3128	WT_rep2_peak_940
chr10	84783428	84783804	377	84783573	124.1	73.3467	8.55296	69.882	WT_rep2_peak_941
chr10	84851131	84851294	164	84851186	64.37	23.0001	4.46926	19.8778	WT_rep2_peak_942
chr10	84950237	84950690	454	84950430	271.97	243.038	18.6631	239.092	WT_rep2_peak_943
chr10	84955528	84955732	205	84955659	60.31	20.3195	4.19172	17.2272	WT_rep2_peak_944
chr10	84956194	84956644	451	84956300	59.15	19.6665	4.11243	16.5826	WT_rep2_peak_945
chr10	85494299	85494670	372	85494380	60.89	20.3195	4.23137	17.2272	WT_rep2_peak_946
chr10	85728777	85729131	355	85728922	121.2	70.4683	8.35473	67.0165	WT_rep2_peak_947
chr10	85885497	85885795	299	85885646	49.87	13.5484	3.47807	10.5486	WT_rep2_peak_948
chr10	85889999	85890414	416	85890284	57.99	18.3821	4.03313	15.3128	WT_rep2_peak_949
chr10	86669971	86670902	932	86670561	756.75	814.189	29.9507	809.594	WT_rep2_peak_950
chr10	87327477	87327766	290	87327672	81.18	35.4988	5.61904	32.261	WT_rep2_peak_951
chr10	88203183	88203766	584	88203638	70.75	27.2164	4.90538	24.0517	WT_rep2_peak_952
chr10	88269658	88269807	150	88269739	115.98	26.4653	3.24937	23.3125	WT_rep2_peak_953
chr10	88281723	88282063	341	88281853	55.67	17.127	3.87454	14.0756	WT_rep2_peak_954
chr10	89476147	89476801	655	89476440	249.93	214.811	17.1565	210.921	WT_rep2_peak_955
chr10	89640657	89641110	454	89640917	236.01	198.521	16.205	194.666	WT_rep2_peak_956
chr10	89641526	89642005	480	89641774	222.68	181.324	15.2931	177.51	WT_rep2_peak_957
chr10	89655189	89655698	510	89655586	93.36	45.2563	6.45164	41.9463	WT_rep2_peak_958
chr10	90421655	90422005	351	90421882	226.16	160.645	11.9556	156.884	WT_rep2_peak_959
chr10	90437618	90437857	240	90437733	89.88	41.9261	6.21375	38.6396	WT_rep2_peak_960
chr10	90440438	90440956	519	90440562	95.68	46.949	6.61023	43.6283	WT_rep2_peak_961
chr10	90577316	90577465	150	90577447	34.21	6.02649	2.40758	3.18431	WT_rep2_peak_962
chr10	90767476	90767804	329	90767684	210.5	101.639	6.82254	98.0586	WT_rep2_peak_963
chr10	90772873	90773031	159	90772918	71.91	27.9407	4.98468	24.7685	WT_rep2_peak_964
chr10	90803005	90803655	651	90803333	103.22	44.4739	5.66412	41.1697	WT_rep2_peak_965
chr10	90805594	90806030	437	90805909	143.23	14.6382	2.06046	11.628	WT_rep2_peak_966
chr10	90937684	90938062	379	90937826	48.71	12.9807	3.39877	9.99094	WT_rep2_peak_967
chr10	93075002	93075758	757	93075309	763.13	826.649	30.3829	822.044	WT_rep2_peak_968
chr10	93805723	93806629	907	93806143	821.7	839.71	26.5387	835.095	WT_rep2_peak_969
chr10	93880150	93880492	343	93880408	56.25	17.7508	3.91419	14.6903	WT_rep2_peak_970
chr10	94414911	94415104	194	94415046	191.36	64.5982	4.58006	61.1768	WT_rep2_peak_971
chr10	94422643	94423289	647	94423077	132.79	81.1725	9.14768	77.6727	WT_rep2_peak_972
chr10	95248593	95248972	380	95248959	46.39	11.8714	3.24018	8.89882	WT_rep2_peak_973
chr10	96454053	96454762	710	96454368	265.59	154.655	8.88627	150.91	WT_rep2_peak_974
chr10	98804735	98804921	187	98804804	930.72	652.992	12.4064	648.532	WT_rep2_peak_975
chr10	98815425	98815595	171	98815566	369.39	112.699	4.25733	109.081	WT_rep2_peak_976
chr10	98830375	98830568	194	98830508	933.62	117.238	2.36612	113.606	WT_rep2_peak_977
chr10	98858604	98859526	923	98859074	3236.93	3692.53	36.1174	3686.7	WT_rep2_peak_978
chr10	98942726	98942896	171	98942766	102.64	53.0126	7.086	49.6538	WT_rep2_peak_979
chr10	99100470	99100778	309	99100645	114.82	43.5509	5.03555	40.2567	WT_rep2_peak_980
chr10	99932090	99932739	650	99932216	190.78	143.488	13.1124	139.774	WT_rep2_peak_981
chr10	100282830	100283450	621	100282976	262.11	231.394	17.9891	227.47	WT_rep2_peak_982
chr10	102224129	102225077	949	102224841	188.46	141.197	12.9538	137.489	WT_rep2_peak_983
chr10	103253934	103254288	355	103254161	53.35	13.1415	3.19703	10.1502	WT_rep2_peak_984
chr10	105025617	105025868	252	105025743	104.38	54.7833	7.20495	51.4133	WT_rep2_peak_985
chr10	105206077	105206304	228	105206187	70.75	27.2164	4.90538	24.0517	WT_rep2_peak_986
chr10	105411083	105411415	333	105411086	71.91	27.9407	4.98468	24.7685	WT_rep2_peak_987
chr10	105682738	105683202	465	105682876	97.42	35.0616	4.68671	31.8293	WT_rep2_peak_988
chr10	106430180	106430423	244	106430303	79.44	33.9432	5.5001	30.7193	WT_rep2_peak_989
chr10	106715205	106716099	895	106715995	237.17	86.2083	4.96195	82.6883	WT_rep2_peak_990
chr10	108096610	108096763	154	108096700	360.69	92.9244	3.69071	89.3781	WT_rep2_peak_991
chr10	108107456	108107605	150	108107536	96.84	47.8022	6.68953	44.4753	WT_rep2_peak_992
chr10	108112943	108113588	646	108113311	256.31	223.705	17.5926	219.796	WT_rep2_peak_993
chr10	108610158	108610484	327	108610228	78.86	33.1733	5.46045	29.9546	WT_rep2_peak_994
chr10	108635325	108635476	152	108635419	70.17	27.2164	4.86573	24.0517	WT_rep2_peak_995
chr10	108645446	108645603	158	108645501	180.34	33.8837	2.87849	30.6622	WT_rep2_peak_996
chr10	108726013	108726183	171	108726044	81.76	35.4988	5.65869	32.261	WT_rep2_peak_997
chr10	108730153	108730453	301	108730374	89.3	26.7887	3.9262	23.6302	WT_rep2_peak_998
chr10	108783648	108783802	155	108783770	74.81	30.1491	5.18292	26.9565	WT_rep2_peak_999
chr10	108799260	108799409	150	108799406	53.35	15.9023	3.71595	12.8665	WT_rep2_peak_1000
chr10	109519692	109519980	289	109519714	50.45	9.80671	2.7079	6.87339	WT_rep2_peak_1001
chr10	109688610	109689367	758	109688882	91.62	12.4205	2.31555	9.44188	WT_rep2_peak_1002
chr10	109823085	109823242	158	109823174	56.83	13.7057	3.21272	10.7047	WT_rep2_peak_1003
chr10	109850090	109850245	156	109850154	60.31	20.3195	4.19172	17.2272	WT_rep2_peak_1004
chr10	110030153	110030302	150	110030261	56.83	17.7508	3.95384	14.6903	WT_rep2_peak_1005
chr10	110052585	110053030	446	110052708	152.51	101.621	10.4957	98.0412	WT_rep2_peak_1006
chr10	110779944	110780366	423	110780189	1122.66	1671.8	76.8262	1666.69	WT_rep2_peak_1007
chr10	111128957	111129361	405	111129099	149.03	98.4782	10.2578	94.9093	WT_rep2_peak_1008
chr10	111343875	111344349	475	111343986	114.24	63.8772	7.87895	60.458	WT_rep2_peak_1009
chr10	112291444	112292348	905	112292285	165.27	84.6055	7.22903	81.0921	WT_rep2_peak_1010
chr10	112299335	112299694	360	112299580	65.53	23.6869	4.54855	20.5589	WT_rep2_peak_1011
chr10	112300930	112301577	648	112301331	116.56	65.7421	8.03755	62.3139	WT_rep2_peak_1012
chr10	112762967	112763821	855	112763367	302.12	214.109	12.1248	210.221	WT_rep2_peak_1013
chr10	112764056	112764485	430	112764275	2454.66	1572.98	10.7704	1567.91	WT_rep2_peak_1014
chr10	114236517	114236942	426	114236850	73.65	29.4072	5.10362	26.2221	WT_rep2_peak_1015
chr10	114237170	114237381	212	114237319	65.53	23.6869	4.54855	20.5589	WT_rep2_peak_1016
chr10	115126544	115126769	226	115126657	132.21	42.6343	4.29723	39.3452	WT_rep2_peak_1017
chr10	115208394	115208810	417	115208515	231.95	192.337	15.9274	188.496	WT_rep2_peak_1018
chr10	115226447	115226960	514	115226760	439.55	277.718	10.2454	273.711	WT_rep2_peak_1019
chr10	115233782	115233931	150	115233841	55.67	17.127	3.87454	14.0756	WT_rep2_peak_1020
chr10	115236498	115236741	244	115236620	104.96	54.7833	7.24459	51.4133	WT_rep2_peak_1021
chr10	115237412	115237572	161	115237528	226.74	73.7515	4.46541	70.2855	WT_rep2_peak_1022
chr10	115247819	115248020	202	115247848	38.27	7.80868	2.68511	4.91926	WT_rep2_peak_1023
chr10	116223614	116223825	212	116223704	91.04	43.5819	6.29305	40.2843	WT_rep2_peak_1024
chr10	116253807	116254291	485	116254011	172.81	49.529	3.95014	46.1917	WT_rep2_peak_1025
chr10	116321157	116321318	162	116321268	97.42	48.6597	6.72917	45.3284	WT_rep2_peak_1026
chr10	116741131	116741280	150	116741165	53.35	15.9023	3.71595	12.8665	WT_rep2_peak_1027
chr10	116742696	116743052	357	116742829	344.45	328.128	21.5908	324.042	WT_rep2_peak_1028
chr10	116909625	116910836	1212	116910187	445.93	489.608	30.5574	485.312	WT_rep2_peak_1029
chr10	117051303	117051825	523	117051729	311.98	204.929	10.7924	201.06	WT_rep2_peak_1030
chr10	117185256	117185408	153	117185355	77.12	32.409	5.34151	29.1972	WT_rep2_peak_1031
chr10	117519551	117519722	172	117519600	43.49	10.2751	3.04194	7.33445	WT_rep2_peak_1032
chr10	117525986	117526692	707	117526470	460.43	469.617	25.635	465.345	WT_rep2_peak_1033
chr10	117570873	117571022	150	117570883	57.41	10.6137	2.65494	7.66991	WT_rep2_peak_1034
chr10	117571194	117571485	292	117571338	67.85	25.0799	4.70714	21.9363	WT_rep2_peak_1035
chr10	118695279	118696919	1641	118695535	918.54	1289.48	62.8702	1284.56	WT_rep2_peak_1036
chr10	119038700	119038969	270	119038846	119.46	33.197	3.76427	29.9781	WT_rep2_peak_1037
chr10	119046756	119047572	817	119047450	187.3	98.7622	7.5776	95.1928	WT_rep2_peak_1038
chr10	119338845	119339029	185	119338971	104.96	14.3495	2.35466	11.3408	WT_rep2_peak_1039
chr10	119350262	119350414	153	119350318	73.65	29.4072	5.10362	26.2221	WT_rep2_peak_1040
chr10	120067013	120067365	353	120067149	246.45	121.748	7.07005	118.101	WT_rep2_peak_1041
chr10	121100209	121100723	515	121100446	119.46	68.567	8.23578	65.1252	WT_rep2_peak_1042
chr10	121101525	121103369	1845	121102480	177.45	128.761	12.2005	125.091	WT_rep2_peak_1043
chr10	121231141	121231549	409	121231316	230.22	165.068	12.1692	161.295	WT_rep2_peak_1044
chr10	121248298	121248497	200	121248371	115.98	64.8078	7.9979	61.3834	WT_rep2_peak_1045
chr10	121586767	121587173	407	121587038	93.94	45.2563	6.49129	41.9463	WT_rep2_peak_1046
chr10	121620438	121620750	313	121620583	132.21	81.1725	9.10803	77.6727	WT_rep2_peak_1047
chr10	121621211	121621445	235	121621355	71.91	27.9407	4.98468	24.7685	WT_rep2_peak_1048
chr10	122777134	122777467	334	122777240	150.77	53.1045	4.74283	49.7454	WT_rep2_peak_1049
chr10	122949261	122949638	378	122949490	619.9	618.491	24.836	614.064	WT_rep2_peak_1050
chr10	123100700	123101323	624	123101115	123.52	15.5692	2.26393	12.5407	WT_rep2_peak_1051
chr10	123179606	123179764	159	123179660	109.6	59.2812	7.56177	55.8868	WT_rep2_peak_1052
chr10	123574763	123575375	613	123575196	87.56	40.2895	6.05516	37.0157	WT_rep2_peak_1053
chr10	125063919	125064269	351	125064051	278.35	214.226	13.9673	210.338	WT_rep2_peak_1054
chr10	126832338	126832614	277	126832484	92.78	10.0603	2.08404	7.1249	WT_rep2_peak_1055
chr10	126891946	126892354	409	126892210	85.82	28.5565	4.34116	25.3812	WT_rep2_peak_1056
chr10	126903468	126903628	161	126903492	59.15	19.12	4.0099	16.0441	WT_rep2_peak_1057
chr10	126914931	126915084	154	126915004	230.79	76.4008	4.545	72.9223	WT_rep2_peak_1058
chr10	126915997	126916512	516	126916247	2133.98	847.54	5.66309	842.919	WT_rep2_peak_1059
chr10	126927441	126928334	894	126927779	3125.01	1814.81	9.24855	1809.63	WT_rep2_peak_1060
chr10	126928854	126929003	150	126928868	200.06	31.2485	2.5777	28.0471	WT_rep2_peak_1061
chr10	127007637	127008080	444	127007972	183.24	84.16	6.35325	80.6492	WT_rep2_peak_1062
chr10	127018483	127018681	199	127018602	305.02	209.3	11.4829	205.422	WT_rep2_peak_1063
chr10	127026331	127026576	246	127026454	89.3	34.8187	5.03078	31.5874	WT_rep2_peak_1064
chr10	127034300	127034533	234	127034426	277.19	250.873	19.0199	246.912	WT_rep2_peak_1065
chr10	127131943	127132333	391	127131990	99.16	25.3866	3.46577	22.2413	WT_rep2_peak_1066
chr10	127334389	127335040	652	127334536	601.92	369.226	9.88397	365.082	WT_rep2_peak_1067
chr10	127497036	127497424	389	127497281	468.55	336.525	12.6905	332.427	WT_rep2_peak_1068
chr10	127955020	127955186	167	127955140	104.38	11.0828	2.06627	8.12864	WT_rep2_peak_1069
chr10	128127195	128127379	185	128127237	59.15	19.6665	4.11243	16.5826	WT_rep2_peak_1070
chr10	128273986	128274306	321	128274204	556.69	288.936	7.74571	284.91	WT_rep2_peak_1071
chr10	128319865	128320194	330	128319942	537.55	66.8971	2.34154	63.4632	WT_rep2_peak_1072
chr10	128324720	128325259	540	128325172	219.2	77.0964	4.7869	73.6162	WT_rep2_peak_1073
chr10	128338291	128338835	545	128338567	267.33	237.847	18.3459	233.91	WT_rep2_peak_1074
chr10	128339658	128339808	151	128339680	55.09	17.127	3.8349	14.0756	WT_rep2_peak_1075
chr10	128379661	128380088	428	128379801	231.95	192.337	15.9274	188.496	WT_rep2_peak_1076
chr10	128380282	128380441	160	128380408	89.3	41.9261	6.17411	38.6396	WT_rep2_peak_1077
chr10	128380614	128380766	153	128380665	57.99	18.3821	4.03313	15.3128	WT_rep2_peak_1078
chr10	128642205	128643458	1254	128642756	367.65	276.643	13.6536	272.638	WT_rep2_peak_1079
chr10	128718916	128719594	679	128719461	173.39	124.31	11.923	120.654	WT_rep2_peak_1080
chr10	128721026	128721190	165	128721085	53.35	7.58732	2.26457	4.7079	WT_rep2_peak_1081
chr11	3241123	3241392	270	3241269	73.07	28.6968	4.93772	25.5185	WT_rep2_peak_1082
chr11	3257863	3258083	221	3258001	37.11	7.34647	2.60582	4.46935	WT_rep2_peak_1083
chr11	3291810	3292313	504	3292107	58.57	19.0207	4.07278	15.9453	WT_rep2_peak_1084
chr11	3295228	3295662	435	3295409	104.96	54.7833	7.24459	51.4133	WT_rep2_peak_1085
chr11	3366656	3367965	1310	3366919	140.33	89.2062	9.6631	85.6739	WT_rep2_peak_1086
chr11	3589934	3590118	185	3590020	183.82	135.509	12.6367	131.818	WT_rep2_peak_1087
chr11	3590375	3591330	956	3590466	362.43	363.295	24.2286	359.159	WT_rep2_peak_1088
chr11	3591768	3592041	274	3591912	67.85	25.0799	4.70714	21.9363	WT_rep2_peak_1089
chr11	3592522	3592928	407	3592792	48.13	12.9807	3.35912	9.99094	WT_rep2_peak_1090
chr11	3594843	3595611	769	3595308	418.68	312.531	13.538	308.469	WT_rep2_peak_1091
chr11	3596526	3597098	573	3596950	266.17	236.553	18.2666	232.619	WT_rep2_peak_1092
chr11	3600198	3600347	150	3600237	64.95	23.0001	4.50891	19.8778	WT_rep2_peak_1093
chr11	3638992	3639417	426	3639134	141.49	81.3428	8.3819	77.8425	WT_rep2_peak_1094
chr11	3639634	3640206	573	3640096	67.27	25.0799	4.6675	21.9363	WT_rep2_peak_1095
chr11	3790203	3790459	257	3790312	52.77	10.7446	2.82998	7.79976	WT_rep2_peak_1096
chr11	3847421	3847818	398	3847563	142.65	65.1021	6.24574	61.6769	WT_rep2_peak_1097
chr11	3857258	3857554	297	3857499	43.49	10.2751	3.04194	7.33445	WT_rep2_peak_1098
chr11	4130374	4130527	154	4130458	51.61	14.709	3.59701	11.6927	WT_rep2_peak_1099
chr11	4432658	4432807	150	4432665	85.82	14.6413	2.63101	11.631	WT_rep2_peak_1100
chr11	4437378	4438524	1147	4438381	178.61	75.5927	5.79371	72.1176	WT_rep2_peak_1101
chr11	4687015	4687164	150	4687062	218.62	20.3088	2.01484	17.2213	WT_rep2_peak_1102
chr11	4687395	4687755	361	4687581	202.38	40.9397	3.03553	37.6634	WT_rep2_peak_1103
chr11	4843196	4843394	199	4843305	60.31	20.3195	4.19172	17.2272	WT_rep2_peak_1104
chr11	4888936	4889767	832	4889460	184.4	59.3407	4.37274	55.9461	WT_rep2_peak_1105
chr11	5009917	5010359	443	5010133	1141.22	985.44	18.4229	980.713	WT_rep2_peak_1106
chr11	5010707	5011063	357	5010828	164.69	66.9499	5.52293	63.5159	WT_rep2_peak_1107
chr11	5230901	5231106	206	5231085	48.13	12.9807	3.35912	9.99094	WT_rep2_peak_1108
chr11	5231273	5231422	150	5231410	77.7	32.409	5.38115	29.1972	WT_rep2_peak_1109
chr11	5231575	5231820	246	5231679	61.47	20.9794	4.27102	17.8811	WT_rep2_peak_1110
chr11	5474688	5475315	628	5475171	220.94	143.093	10.3709	139.38	WT_rep2_peak_1111
chr11	5654349	5654498	150	5654483	51.03	14.709	3.55736	11.6927	WT_rep2_peak_1112
chr11	5665513	5667771	2259	5666673	1152.23	1444.42	45.5824	1439.42	WT_rep2_peak_1113
chr11	5730334	5730576	243	5730437	306.76	289.513	21.042	285.485	WT_rep2_peak_1114
chr11	5919687	5921066	1380	5919976	3059.48	2462.21	16.193	2456.79	WT_rep2_peak_1115
chr11	5921590	5921853	264	5921719	1699.65	367.911	3.28945	363.769	WT_rep2_peak_1116
chr11	6056616	6057204	589	6057055	1075.69	811.819	14.167	807.226	WT_rep2_peak_1117
chr11	6246904	6247184	281	6247050	393.16	260.008	10.949	256.031	WT_rep2_peak_1118
chr11	6263703	6263929	227	6263833	88.72	41.1054	6.13446	37.8253	WT_rep2_peak_1119
chr11	6354964	6355429	466	6355301	165.27	66.893	5.46933	63.4591	WT_rep2_peak_1120
chr11	6423053	6425167	2115	6423843	2485.97	2837.56	36.0431	2832	WT_rep2_peak_1121
chr11	6546218	6546699	482	6546602	91.04	43.5819	6.29305	40.2843	WT_rep2_peak_1122
chr11	6550253	6550541	289	6550395	51.03	14.709	3.55736	11.6927	WT_rep2_peak_1123
chr11	7119325	7119739	415	7119443	905.2	116.896	2.39736	113.264	WT_rep2_peak_1124
chr11	7122083	7122816	734	7122300	3240.41	2294.04	12.7614	2288.68	WT_rep2_peak_1125
chr11	7156711	7156937	227	7156839	34.79	6.02649	2.44723	3.18431	WT_rep2_peak_1126
chr11	8383316	8384535	1220	8384074	561.33	603.432	29.3645	599.02	WT_rep2_peak_1127
chr11	8442460	8443173	714	8442735	161.21	93.5022	8.53729	89.9524	WT_rep2_peak_1128
chr11	11883111	11883362	252	11883251	105.54	55.6748	7.28424	52.3006	WT_rep2_peak_1129
chr11	12203308	12203615	308	12203359	55.67	17.127	3.87454	14.0756	WT_rep2_peak_1130
chr11	16231840	16232671	832	16232306	1441.6	2033.43	65.5726	2028.16	WT_rep2_peak_1131
chr11	16861951	16862383	433	16862039	98	49.5217	6.76882	46.1845	WT_rep2_peak_1132
chr11	17028462	17028705	244	17028575	175.71	69.201	5.35472	65.7573	WT_rep2_peak_1133
chr11	19970706	19971857	1152	19971114	433.18	302.943	12.0604	298.895	WT_rep2_peak_1134
chr11	20174807	20175102	296	20174956	111.92	15.2007	2.35246	12.1808	WT_rep2_peak_1135
chr11	20190040	20190322	283	20190131	48.13	12.9807	3.35912	9.99094	WT_rep2_peak_1136
chr11	20252795	20254291	1497	20253789	81.76	35.4988	5.65869	32.261	WT_rep2_peak_1137
chr11	20597922	20598187	266	20597993	49.87	13.5484	3.47807	10.5486	WT_rep2_peak_1138
chr11	20598511	20599026	516	20598821	98.58	49.5217	6.80847	46.1845	WT_rep2_peak_1139
chr11	20662262	20662459	198	20662318	111.92	61.1081	7.72036	57.7031	WT_rep2_peak_1140
chr11	20675692	20677665	1974	20675924	554.37	559.092	25.2442	554.725	WT_rep2_peak_1141
chr11	20775881	20776570	690	20776190	468.55	524.717	32.1037	520.385	WT_rep2_peak_1142
chr11	21094047	21094389	343	21094271	151.35	100.571	10.4164	96.9939	WT_rep2_peak_1143
chr11	21098068	21098544	477	21098192	393.16	167.074	5.97217	163.295	WT_rep2_peak_1144
chr11	21227775	21227986	212	21227910	50.45	14.1246	3.51771	11.1181	WT_rep2_peak_1145
chr11	22045417	22046159	743	22045655	285.3	261.407	19.575	257.427	WT_rep2_peak_1146
chr11	22468551	22468705	155	22468606	75.39	30.8968	5.22256	27.697	WT_rep2_peak_1147
chr11	22786055	22787166	1112	22786467	114.82	63.8772	7.9186	60.458	WT_rep2_peak_1148
chr11	22922254	22923112	859	22922472	438.97	298.697	11.5783	294.655	WT_rep2_peak_1149
chr11	22923290	22923594	305	22923456	500.44	149.904	4.2138	146.172	WT_rep2_peak_1150
chr11	22924222	22924728	507	22924368	434.92	290.028	11.1917	286	WT_rep2_peak_1151
chr11	23313822	23314489	668	23313956	1189.93	333.932	4.0234	329.838	WT_rep2_peak_1152
chr11	23414379	23414629	251	23414500	192.52	145.789	13.2314	142.067	WT_rep2_peak_1153
chr11	23438546	23439109	564	23438723	221.52	145.866	10.596	142.145	WT_rep2_peak_1154
chr11	23605598	23605796	199	23605725	98	49.5217	6.76882	46.1845	WT_rep2_peak_1155
chr11	24026808	24027015	208	24026883	73.65	29.4072	5.10362	26.2221	WT_rep2_peak_1156
chr11	24035304	24035577	274	24035439	78.86	15.4224	2.85231	12.3949	WT_rep2_peak_1157
chr11	24113322	24113798	477	24113661	249.93	89.9969	4.95422	86.4624	WT_rep2_peak_1158
chr11	24113964	24115291	1328	24114052	534.08	272.297	7.53628	268.299	WT_rep2_peak_1159
chr11	24122707	24123070	364	24122967	159.47	85.137	7.64137	81.6224	WT_rep2_peak_1160
chr11	25562525	25562679	155	25562629	66.11	24.3802	4.5882	21.2442	WT_rep2_peak_1161
chr11	26337071	26337223	153	26337099	73.07	29.4072	5.06397	26.2221	WT_rep2_peak_1162
chr11	28487296	28487469	174	28487397	56.83	17.7508	3.95384	14.6903	WT_rep2_peak_1163
chr11	28526477	28527425	949	28527231	766.61	371.243	7.1075	367.096	WT_rep2_peak_1164
chr11	28533894	28534149	256	28534014	174.55	42.3011	3.44208	39.0132	WT_rep2_peak_1165
chr11	29138092	29138566	475	29138332	236.59	198.521	16.2446	194.666	WT_rep2_peak_1166
chr11	29171625	29172114	490	29171757	369.39	212.254	8.81876	208.37	WT_rep2_peak_1167
chr11	29413118	29414121	1004	29413812	375.19	325.366	17.8287	321.284	WT_rep2_peak_1168
chr11	29453837	29454381	545	29454062	293.42	204.249	11.7769	200.382	WT_rep2_peak_1169
chr11	29456988	29457152	165	29457076	92.78	44.4168	6.41199	41.1129	WT_rep2_peak_1170
chr11	29457629	29457872	244	29457731	121.78	52.8778	5.84649	49.5222	WT_rep2_peak_1171
chr11	29656602	29657747	1146	29657204	891.29	323.112	5.09878	319.034	WT_rep2_peak_1172
chr11	29657965	29658256	292	29658112	497.54	190.59	5.36068	186.754	WT_rep2_peak_1173
chr11	30067780	30068087	308	30067828	336.33	57.5759	2.76504	54.1906	WT_rep2_peak_1174
chr11	30089143	30089418	276	30089187	698.76	94.1497	2.44673	90.5982	WT_rep2_peak_1175
chr11	30204724	30204916	193	30204869	72.49	28.671	5.02432	25.4931	WT_rep2_peak_1176
chr11	30211257	30211499	243	30211296	94.52	18.7473	2.89459	15.6759	WT_rep2_peak_1177
chr11	30215620	30215965	346	30215687	41.17	9.25841	2.88335	6.33707	WT_rep2_peak_1178
chr11	30842198	30842648	451	30842502	114.82	63.8772	7.9186	60.458	WT_rep2_peak_1179
chr11	30927281	30927545	265	30927424	121.78	70.4683	8.39437	67.0165	WT_rep2_peak_1180
chr11	31309987	31310216	230	31310082	54.51	16.5108	3.79525	13.4685	WT_rep2_peak_1181
chr11	31615352	31615899	548	31615588	221.52	180.11	15.2138	176.298	WT_rep2_peak_1182
chr11	31821015	31821700	686	31821487	487.68	224.088	6.60385	220.179	WT_rep2_peak_1183
chr11	31822509	31822950	442	31822573	198.32	44.6469	3.26756	41.3421	WT_rep2_peak_1184
chr11	31823110	31823316	207	31823211	114.24	38.4553	4.43222	35.1969	WT_rep2_peak_1185
chr11	32466012	32466792	781	32466379	114.24	63.8772	7.87895	60.458	WT_rep2_peak_1186
chr11	32694639	32695000	362	32694862	161.79	88.0432	7.88322	84.5169	WT_rep2_peak_1187
chr11	35071067	35071216	150	35071184	82.34	9.20778	2.0836	6.29415	WT_rep2_peak_1188
chr11	35598830	35599360	531	35599046	615.84	333.286	8.22453	329.193	WT_rep2_peak_1189
chr11	35897564	35897916	353	35897796	234.27	99.6855	5.88186	96.1121	WT_rep2_peak_1190
chr11	35898069	35899364	1296	35898490	1616.72	1865.58	36.7665	1860.37	WT_rep2_peak_1191
chr11	35914626	35915300	675	35914993	138.01	64.2442	6.31877	60.8239	WT_rep2_peak_1192
chr11	35937946	35938159	214	35938076	103.8	14.5799	2.38181	11.5699	WT_rep2_peak_1193
chr11	36174743	36175065	323	36174977	51.61	14.709	3.59701	11.6927	WT_rep2_peak_1194
chr11	36389324	36389606	283	36389445	82.92	18.2851	3.10829	15.2214	WT_rep2_peak_1195
chr11	36429929	36430151	223	36430026	190.2	60.8392	4.34552	57.4375	WT_rep2_peak_1196
chr11	36458902	36459186	285	36459047	84.66	37.8714	5.85693	34.6154	WT_rep2_peak_1197
chr11	36496976	36497222	247	36497094	249.93	102.736	5.70298	99.1512	WT_rep2_peak_1198
chr11	36497685	36497841	157	36497706	53.35	15.9023	3.71595	12.8665	WT_rep2_peak_1199
chr11	36509669	36509826	158	36509709	158.31	32.9486	3.06364	29.7345	WT_rep2_peak_1200
chr11	36543906	36544123	218	36544036	313.72	247.863	14.8103	243.908	WT_rep2_peak_1201
chr11	36568312	36568585	274	36568451	96.26	15.7321	2.55951	12.7028	WT_rep2_peak_1202
chr11	36694274	36694524	251	36694303	48.13	6.31291	2.13611	3.46758	WT_rep2_peak_1203
chr11	36696935	36697100	166	36696979	144.97	17.5556	2.24572	14.5017	WT_rep2_peak_1204
chr11	36741464	36741698	235	36741587	56.83	11.7997	2.89144	8.83352	WT_rep2_peak_1205
chr11	37003383	37003633	251	37003482	48.71	12.5625	3.31403	9.58183	WT_rep2_peak_1206
chr11	41803080	41803320	241	41803177	62.63	20.2444	4.09182	17.1572	WT_rep2_peak_1207
chr11	42024459	42024652	194	42024471	313.72	39.9494	2.34865	36.6786	WT_rep2_peak_1208
chr11	42517480	42518624	1145	42518273	905.78	734.655	16.1926	730.126	WT_rep2_peak_1209
chr11	43336735	43337156	422	43336919	183.24	86.6346	6.58015	83.1136	WT_rep2_peak_1210
chr11	43476425	43477037	613	43476744	99.74	50.388	6.88776	47.045	WT_rep2_peak_1211
chr11	43595471	43596189	719	43595746	371.13	328.901	18.6064	324.814	WT_rep2_peak_1212
chr11	43610955	43611279	325	43611144	79.44	23.3356	3.83069	20.2115	WT_rep2_peak_1213
chr11	44345598	44345846	249	44345743	94.52	46.1004	6.53093	42.7859	WT_rep2_peak_1214
chr11	44454736	44455622	887	44455056	583.95	600.668	26.5885	596.258	WT_rep2_peak_1215
chr11	45799918	45800198	281	45800067	225.58	120.5	7.81296	116.856	WT_rep2_peak_1216
chr11	46086764	46087192	429	46086871	287.62	27.7991	2.06307	24.6314	WT_rep2_peak_1217
chr11	46331550	46332094	545	46331688	103.8	50.1469	6.54998	46.8077	WT_rep2_peak_1218
chr11	48642968	48643117	150	48643079	63.79	22.3198	4.42961	19.2056	WT_rep2_peak_1219
chr11	48706982	48707469	488	48707139	631.5	536.703	17.5694	532.36	WT_rep2_peak_1220
chr11	48757422	48757581	160	48757523	93.36	45.2563	6.45164	41.9463	WT_rep2_peak_1221
chr11	49105845	49108274	2430	49106087	426.8	411.261	22.5156	407.057	WT_rep2_peak_1222
chr11	49108572	49108977	406	49108915	36.53	6.89518	2.56617	4.0308	WT_rep2_peak_1223
chr11	49136161	49136422	262	49136288	237.75	199.763	16.3239	195.906	WT_rep2_peak_1224
chr11	49151951	49152798	848	49152210	120.62	49.9579	5.52802	46.6195	WT_rep2_peak_1225
chr11	49774132	49774321	190	49774216	102.64	53.0126	7.086	49.6538	WT_rep2_peak_1226
chr11	50010900	50011250	351	50011047	100.32	49.9622	6.70996	46.6238	WT_rep2_peak_1227
chr11	50011982	50012222	241	50012105	52.77	15.3017	3.67631	12.2754	WT_rep2_peak_1228
chr11	50012408	50013334	927	50012829	294	273.373	20.1697	269.373	WT_rep2_peak_1229
chr11	50061558	50062286	729	50062074	598.44	497.006	16.7442	492.702	WT_rep2_peak_1230
chr11	50125604	50125850	247	50125732	64.95	10.7031	2.53644	7.75877	WT_rep2_peak_1231
chr11	50157281	50157431	151	50157357	50.45	12.5779	3.21563	9.59689	WT_rep2_peak_1232
chr11	50187026	50187304	279	50187158	305.02	62.4577	3.09112	59.0476	WT_rep2_peak_1233
chr11	50705215	50706170	956	50705501	493.48	563.433	33.8085	559.061	WT_rep2_peak_1234
chr11	50706368	50706759	392	50706620	69.59	19.9003	3.71507	16.8148	WT_rep2_peak_1235
chr11	50763981	50764156	176	50764037	55.67	17.127	3.87454	14.0756	WT_rep2_peak_1236
chr11	50790291	50790467	177	50790374	119.46	68.567	8.23578	65.1252	WT_rep2_peak_1237
chr11	50790755	50790967	213	50790833	103.8	53.8959	7.1653	50.5313	WT_rep2_peak_1238
chr11	50960173	50960322	150	50960182	41.75	9.25841	2.923	6.33707	WT_rep2_peak_1239
chr11	51534579	51534879	301	51534743	210.5	158.676	13.2187	154.92	WT_rep2_peak_1240
chr11	51576476	51576774	299	51576588	95.1	46.949	6.57058	43.6283	WT_rep2_peak_1241
chr11	51634432	51634891	460	51634576	98	49.5217	6.76882	46.1845	WT_rep2_peak_1242
chr11	51705667	51706506	840	51706118	651.79	819.836	44.6323	815.236	WT_rep2_peak_1243
chr11	51707779	51708369	591	51708247	108.44	25.8469	3.31633	22.6973	WT_rep2_peak_1244
chr11	52012690	52013536	847	52012820	713.84	74.1101	2.15964	70.6432	WT_rep2_peak_1245
chr11	52018227	52018410	184	52018324	110.76	48.6523	5.88202	45.3224	WT_rep2_peak_1246
chr11	52294022	52294184	163	52294145	171.65	26.1304	2.53892	22.9793	WT_rep2_peak_1247
chr11	53077254	53077922	669	53077392	153.09	102.675	10.5353	99.0906	WT_rep2_peak_1248
chr11	53080810	53081331	522	53080879	123.52	72.3838	8.51332	68.9237	WT_rep2_peak_1249
chr11	53081568	53082084	517	53081949	121.78	70.4683	8.39437	67.0165	WT_rep2_peak_1250
chr11	53152358	53152665	308	53152613	95.68	10.0734	2.05705	7.1379	WT_rep2_peak_1251
chr11	53223278	53223481	204	53223383	103.8	53.8959	7.1653	50.5313	WT_rep2_peak_1252
chr11	53290542	53290895	354	53290715	158.89	32.038	3.01677	28.8315	WT_rep2_peak_1253
chr11	53306116	53306561	446	53306355	311.98	229.419	13.0408	225.5	WT_rep2_peak_1254
chr11	53368077	53368352	276	53368216	416.94	171.985	5.8047	168.194	WT_rep2_peak_1255
chr11	53368741	53369474	734	53369024	131.63	48.4694	4.91238	45.1404	WT_rep2_peak_1256
chr11	53439529	53439799	271	53439658	80.6	15.5236	2.81394	12.4953	WT_rep2_peak_1257
chr11	53484098	53484316	219	53484205	391.42	159.127	5.6873	155.37	WT_rep2_peak_1258
chr11	53491699	53491998	300	53491852	173.39	94.8065	7.92664	91.2526	WT_rep2_peak_1259
chr11	54251906	54252268	363	54252043	218.04	62.9518	3.9825	59.5377	WT_rep2_peak_1260
chr11	54393579	54394460	882	54394328	220.94	178.898	15.1741	175.089	WT_rep2_peak_1261
chr11	54582197	54582548	352	54582340	155.99	104.79	10.7336	101.198	WT_rep2_peak_1262
chr11	54587448	54587767	320	54587568	94.52	19.6295	2.98505	16.5505	WT_rep2_peak_1263
chr11	54587975	54588124	150	54588097	46.97	11.8714	3.27983	8.89882	WT_rep2_peak_1264
chr11	55124316	55124545	230	55124464	109.6	59.2812	7.56177	55.8868	WT_rep2_peak_1265
chr11	55390626	55391111	486	55390748	118.3	63.2478	7.45606	59.833	WT_rep2_peak_1266
chr11	56929227	56929394	168	56929327	237.17	66.5831	3.90449	63.1523	WT_rep2_peak_1267
chr11	56931185	56931565	381	56931442	244.71	126.631	7.52564	122.968	WT_rep2_peak_1268
chr11	56975210	56975390	181	56975297	85.82	38.6725	5.93622	35.4099	WT_rep2_peak_1269
chr11	57189656	57189930	275	57189786	445.35	194.845	6.20366	190.999	WT_rep2_peak_1270
chr11	57204522	57204764	243	57204670	143.23	65.9186	6.27096	62.4898	WT_rep2_peak_1271
chr11	57205901	57206271	371	57206055	172.81	84.3456	6.86981	80.8328	WT_rep2_peak_1272
chr11	57218320	57219265	946	57218593	2061.5	1299.05	10.4695	1294.13	WT_rep2_peak_1273
chr11	57219516	57219822	307	57219644	468.55	58.2663	2.33606	54.8786	WT_rep2_peak_1274
chr11	57220122	57220940	819	57220634	4606.62	3424.93	13.9625	3419.17	WT_rep2_peak_1275
chr11	57374483	57374767	285	57374628	103.22	18.0247	2.6723	14.9627	WT_rep2_peak_1276
chr11	57420495	57421161	667	57420778	202.96	157.424	13.945	153.671	WT_rep2_peak_1277
chr11	57421576	57422492	917	57422368	158.31	107.984	10.8922	104.381	WT_rep2_peak_1278
chr11	57949401	57949659	259	57949539	165.85	76.6834	6.41722	73.2043	WT_rep2_peak_1279
chr11	57950043	57950914	872	57950466	266.17	226.007	16.698	222.095	WT_rep2_peak_1280
chr11	58008362	58008626	265	58008507	70.75	27.2164	4.90538	24.0517	WT_rep2_peak_1281
chr11	58012148	58012321	174	58012232	81.18	35.4988	5.61904	32.261	WT_rep2_peak_1282
chr11	58207433	58207715	283	58207576	86.4	39.4785	5.97587	36.2095	WT_rep2_peak_1283
chr11	58236920	58237069	150	58237059	33.63	5.60964	2.36793	2.78141	WT_rep2_peak_1284
chr11	58749478	58749792	315	58749620	63.21	22.3198	4.38996	19.2056	WT_rep2_peak_1285
chr11	58751335	58751494	160	58751409	94.52	46.1004	6.53093	42.7859	WT_rep2_peak_1286
chr11	58781725	58781874	150	58781813	56.25	17.7508	3.91419	14.6903	WT_rep2_peak_1287
chr11	58845813	58846016	204	58845897	179.76	36.0022	3.01275	32.7625	WT_rep2_peak_1288
chr11	59067190	59067349	160	59067298	72.49	28.671	5.02432	25.4931	WT_rep2_peak_1289
chr11	59067983	59068191	209	59068079	150.77	99.5231	10.3767	95.9501	WT_rep2_peak_1290
chr11	59089333	59089570	238	59089426	56.25	17.7508	3.91419	14.6903	WT_rep2_peak_1291
chr11	59089921	59090072	152	59090002	77.7	32.409	5.38115	29.1972	WT_rep2_peak_1292
chr11	59090665	59091056	392	59090871	192.52	145.789	13.2314	142.067	WT_rep2_peak_1293
chr11	59328923	59329072	150	59328984	158.31	24.1935	2.52872	21.0627	WT_rep2_peak_1294
chr11	59346203	59346682	480	59346337	221.52	180.11	15.2138	176.298	WT_rep2_peak_1295
chr11	59650008	59650332	325	59650147	503.34	138.32	3.90963	134.621	WT_rep2_peak_1296
chr11	59650692	59650989	298	59650842	218.04	86.5291	5.41502	83.0085	WT_rep2_peak_1297
chr11	59682747	59683461	715	59682863	119.46	68.567	8.23578	65.1252	WT_rep2_peak_1298
chr11	59851470	59851925	456	59851731	73.65	25.2596	4.39092	22.1151	WT_rep2_peak_1299
chr11	59852601	59852751	151	59852626	64.37	23.0001	4.46926	19.8778	WT_rep2_peak_1300
chr11	59854299	59854826	528	59854497	147.29	96.3971	10.1389	92.8359	WT_rep2_peak_1301
chr11	60076638	60077047	410	60076770	131.63	29.7936	3.23498	26.6064	WT_rep2_peak_1302
chr11	60077550	60078260	711	60077939	268.49	157.552	8.98292	153.799	WT_rep2_peak_1303
chr11	60078412	60078577	166	60078468	75.39	27.275	4.60152	24.1098	WT_rep2_peak_1304
chr11	60079897	60080428	532	60080281	53.93	12.143	3.05164	9.16819	WT_rep2_peak_1305
chr11	60080763	60081295	533	60081041	131.63	46.7361	4.73694	43.4194	WT_rep2_peak_1306
chr11	60120628	60120894	267	60120856	83.5	12.4225	2.41439	9.44269	WT_rep2_peak_1307
chr11	60130262	60130674	413	60130548	149.03	73.4792	6.81959	70.014	WT_rep2_peak_1308
chr11	60332750	60333300	551	60332898	286.46	262.731	19.6543	258.748	WT_rep2_peak_1309
chr11	60622432	60622828	397	60622579	172.23	123.204	11.8437	119.551	WT_rep2_peak_1310
chr11	60668975	60669483	509	60669341	107.86	57.4701	7.44283	54.0849	WT_rep2_peak_1311
chr11	60670760	60670912	153	60670815	38.85	7.80868	2.72476	4.91926	WT_rep2_peak_1312
chr11	60674736	60675417	682	60675060	98.58	49.5217	6.80847	46.1845	WT_rep2_peak_1313
chr11	60675603	60675900	298	60675789	52.77	15.3017	3.67631	12.2754	WT_rep2_peak_1314
chr11	60755325	60755958	634	60755758	341.55	314.893	20.1502	310.827	WT_rep2_peak_1315
chr11	60961064	60961262	199	60961184	67.27	25.0799	4.6675	21.9363	WT_rep2_peak_1316
chr11	60961481	60961656	176	60961566	104.96	54.7833	7.24459	51.4133	WT_rep2_peak_1317
chr11	61299397	61299690	294	61299544	54.51	16.5108	3.79525	13.4685	WT_rep2_peak_1318
chr11	61382107	61382527	421	61382252	66.11	24.3802	4.5882	21.2442	WT_rep2_peak_1319
chr11	61408479	61408825	347	61408682	73.07	21.7265	3.80801	18.6195	WT_rep2_peak_1320
chr11	61437028	61437787	760	61437233	831.56	900.74	30.5526	896.076	WT_rep2_peak_1321
chr11	61667831	61668729	899	61668508	930.14	765.23	16.6275	760.675	WT_rep2_peak_1322
chr11	61805856	61806123	268	61805999	82.92	36.2845	5.73798	33.0401	WT_rep2_peak_1323
chr11	62008622	62009081	460	62008884	255.15	101.957	5.49678	98.3763	WT_rep2_peak_1324
chr11	62009572	62010105	534	62009814	204.7	67.4282	4.50109	63.9929	WT_rep2_peak_1325
chr11	62018979	62019144	166	62019081	118.3	41.1475	4.58834	37.8671	WT_rep2_peak_1326
chr11	62022527	62022676	150	62022607	100.9	47.6346	6.36877	44.3116	WT_rep2_peak_1327
chr11	62030046	62030403	358	62030159	117.72	66.6801	8.11684	63.2469	WT_rep2_peak_1328
chr11	62110588	62110737	150	62110716	51.61	9.47265	2.6305	6.54934	WT_rep2_peak_1329
chr11	62204697	62205633	937	62205015	153.09	94.4777	9.28254	90.9245	WT_rep2_peak_1330
chr11	62208245	62208728	484	62208590	494.64	507.042	26.0865	502.728	WT_rep2_peak_1331
chr11	62274078	62274341	264	62274211	146.13	47.2382	4.3274	43.9166	WT_rep2_peak_1332
chr11	62275613	62275793	181	62275679	341.55	72.9947	3.20143	69.5329	WT_rep2_peak_1333
chr11	62555745	62555954	210	62555838	49.29	13.5484	3.43842	10.5486	WT_rep2_peak_1334
chr11	62604630	62604988	359	62604882	222.1	181.324	15.2534	177.51	WT_rep2_peak_1335
chr11	62670635	62670950	316	62670887	40.59	8.76489	2.84371	5.85521	WT_rep2_peak_1336
chr11	62671243	62671737	495	62671532	103.8	53.8959	7.1653	50.5313	WT_rep2_peak_1337
chr11	63854850	63855031	182	63854969	67.85	25.0799	4.70714	21.9363	WT_rep2_peak_1338
chr11	65580555	65581750	1196	65581201	1866.66	2324.75	45.5526	2319.38	WT_rep2_peak_1339
chr11	65719006	65719692	687	65719234	273.13	234.806	17.1329	230.877	WT_rep2_peak_1340
chr11	66102953	66103543	591	66103299	50.45	6.48245	2.14376	3.62655	WT_rep2_peak_1341
chr11	66106704	66106955	252	66106868	86.4	19.5093	3.13835	16.431	WT_rep2_peak_1342
chr11	66107949	66108680	732	66108474	873.89	801.39	20.8307	796.806	WT_rep2_peak_1343
chr11	67568591	67569855	1265	67568921	155.41	89.3366	8.43179	85.8037	WT_rep2_peak_1344
chr11	67574110	67574365	256	67574250	466.23	101.884	3.26734	98.3028	WT_rep2_peak_1345
chr11	68705909	68706256	348	68706064	336.33	270.621	15.3334	266.626	WT_rep2_peak_1346
chr11	68951584	68951733	150	68951694	41.75	9.25841	2.923	6.33707	WT_rep2_peak_1347
chr11	68981478	68981872	395	68981778	931.3	220.004	3.49175	216.103	WT_rep2_peak_1348
chr11	68999958	69000156	199	69000102	96.84	37.9511	5.14953	34.6947	WT_rep2_peak_1349
chr11	69231900	69232597	698	69232270	289.94	199.905	11.6377	196.047	WT_rep2_peak_1350
chr11	69284614	69284763	150	69284673	48.71	12.9807	3.39877	9.99094	WT_rep2_peak_1351
chr11	69295203	69295515	313	69295421	81.18	16.8614	2.93515	13.817	WT_rep2_peak_1352
chr11	69295864	69296131	268	69296011	138.59	17.6363	2.28841	14.5816	WT_rep2_peak_1353
chr11	69445742	69446110	369	69445914	171.07	62.5861	4.91619	59.1756	WT_rep2_peak_1354
chr11	69490606	69491151	546	69490703	265.01	65.8893	3.54678	62.4607	WT_rep2_peak_1355
chr11	69514458	69514619	162	69514552	104.96	54.7833	7.24459	51.4133	WT_rep2_peak_1356
chr11	69625382	69626076	695	69625940	92.2	13.4237	2.38979	10.4305	WT_rep2_peak_1357
chr11	69668894	69669896	1003	69669285	781.11	606.882	14.8267	602.466	WT_rep2_peak_1358
chr11	69672043	69672194	152	69672176	95.68	37.2186	5.08849	33.9684	WT_rep2_peak_1359
chr11	69713999	69714149	151	69714136	367.65	129.312	4.87953	125.641	WT_rep2_peak_1360
chr11	69715755	69717018	1264	69715901	446.51	393.556	18.6464	389.374	WT_rep2_peak_1361
chr11	69717717	69718050	334	69717895	189.04	24.3132	2.3176	21.1817	WT_rep2_peak_1362
chr11	69880955	69881356	402	69881081	57.99	18.3821	4.03313	15.3128	WT_rep2_peak_1363
chr11	69889397	69889880	484	69889590	422.74	245.529	9.01569	241.578	WT_rep2_peak_1364
chr11	69890059	69890519	461	69890319	95.1	46.949	6.57058	43.6283	WT_rep2_peak_1365
chr11	69935467	69935778	312	69935571	694.7	119.321	2.80526	115.681	WT_rep2_peak_1366
chr11	70284640	70284792	153	70284766	103.22	38.5773	4.87009	35.3185	WT_rep2_peak_1367
chr11	70285033	70285679	647	70285149	289.94	137.211	6.76612	133.515	WT_rep2_peak_1368
chr11	70535080	70535499	420	70535255	100.32	16.7184	2.59796	13.6746	WT_rep2_peak_1369
chr11	70560448	70560965	518	70560578	205.28	75.6426	5.00679	72.1674	WT_rep2_peak_1370
chr11	70662006	70663375	1370	70662097	105.54	55.6748	7.28424	52.3006	WT_rep2_peak_1371
chr11	70808192	70808445	254	70808424	614.68	144.08	3.45888	140.364	WT_rep2_peak_1372
chr11	70831225	70831703	479	70831366	716.74	418.623	9.20179	414.409	WT_rep2_peak_1373
chr11	70875092	70875592	501	70875222	212.24	169.272	14.5794	165.488	WT_rep2_peak_1374
chr11	70877349	70878203	855	70877558	449.99	495.344	30.7844	491.042	WT_rep2_peak_1375
chr11	70900801	70901186	386	70900938	112.5	62.0273	7.76001	58.6183	WT_rep2_peak_1376
chr11	70916246	70916608	363	70916456	291.1	269.371	19.9715	265.377	WT_rep2_peak_1377
chr11	70922898	70923293	396	70923148	708.62	449.385	10.4356	445.135	WT_rep2_peak_1378
chr11	71679682	71680364	683	71680074	236.59	176.648	13.1267	172.845	WT_rep2_peak_1379
chr11	72045087	72045454	368	72045321	140.33	59.0113	5.6533	55.6201	WT_rep2_peak_1380
chr11	72089440	72089852	413	72089587	175.13	119.78	11.0079	116.14	WT_rep2_peak_1381
chr11	72343513	72343835	323	72343742	142.07	89.7254	9.53815	86.1916	WT_rep2_peak_1382
chr11	72358552	72358972	421	72358829	68.43	8.01413	2.10384	5.12284	WT_rep2_peak_1383
chr11	72658578	72658779	202	72658678	82.92	36.2845	5.73798	33.0401	WT_rep2_peak_1384
chr11	72659203	72659356	154	72659248	149.03	98.4782	10.2578	94.9093	WT_rep2_peak_1385
chr11	72669035	72669441	407	72669146	70.75	27.2164	4.90538	24.0517	WT_rep2_peak_1386
chr11	72931257	72932302	1046	72932071	336.91	252.377	13.5166	248.413	WT_rep2_peak_1387
chr11	73067145	73067372	228	73067223	380.99	219.288	8.88339	215.389	WT_rep2_peak_1388
chr11	73075333	73075523	191	73075458	53.35	15.9023	3.71595	12.8665	WT_rep2_peak_1389
chr11	74560246	74560645	400	74560375	124.68	73.3467	8.59261	69.882	WT_rep2_peak_1390
chr11	74708168	74708462	295	74708306	58.57	19.0207	4.07278	15.9453	WT_rep2_peak_1391
chr11	74788291	74788533	243	74788400	43.49	10.2751	3.04194	7.33445	WT_rep2_peak_1392
chr11	74796490	74796984	495	74796952	86.98	39.4785	6.01552	36.2095	WT_rep2_peak_1393
chr11	74819800	74820371	572	74820241	221.52	103.202	6.54461	99.616	WT_rep2_peak_1394
chr11	74820980	74821254	275	74821116	67.27	25.0799	4.6675	21.9363	WT_rep2_peak_1395
chr11	75068389	75069005	617	75068528	66.69	24.3802	4.62785	21.2442	WT_rep2_peak_1396
chr11	75156382	75157963	1582	75156623	724.28	351.377	7.11057	347.258	WT_rep2_peak_1397
chr11	75341688	75342210	523	75341927	274.87	246.949	18.8614	242.995	WT_rep2_peak_1398
chr11	75343318	75343474	157	75343410	77.12	32.409	5.34151	29.1972	WT_rep2_peak_1399
chr11	75343826	75344408	583	75344064	74.81	29.427	5.05369	26.2417	WT_rep2_peak_1400
chr11	75463489	75463842	354	75463588	221.52	150.379	11.1258	146.646	WT_rep2_peak_1401
chr11	75529008	75529591	584	75529184	98.58	48.5181	6.63872	45.1887	WT_rep2_peak_1402
chr11	75582893	75583494	602	75583187	684.85	638.634	21.4327	634.187	WT_rep2_peak_1403
chr11	75594070	75595226	1157	75594789	282.4	195.938	11.6868	192.09	WT_rep2_peak_1404
chr11	75596261	75596604	344	75596458	317.78	206.827	10.6259	202.955	WT_rep2_peak_1405
chr11	75656163	75656339	177	75656261	252.25	44.1874	2.78298	40.8877	WT_rep2_peak_1406
chr11	75660271	75660665	395	75660406	111.34	44.3024	5.23844	41.0022	WT_rep2_peak_1407
chr11	75662097	75662980	884	75662420	617.58	534.098	18.1935	529.757	WT_rep2_peak_1408
chr11	76101493	76101665	173	76101619	64.95	23.0001	4.50891	19.8778	WT_rep2_peak_1409
chr11	76101939	76102241	303	76102008	55.09	17.127	3.8349	14.0756	WT_rep2_peak_1410
chr11	76103093	76103249	157	76103147	57.99	18.3821	4.03313	15.3128	WT_rep2_peak_1411
chr11	76103597	76103845	249	76103801	44.07	10.7979	3.08159	7.84597	WT_rep2_peak_1412
chr11	76105199	76105621	423	76105318	69.01	26.4981	4.78644	23.3411	WT_rep2_peak_1413
chr11	76140801	76141333	533	76141184	196.58	150.416	13.5089	146.682	WT_rep2_peak_1414
chr11	76309533	76310120	588	76309863	1754.16	1592.89	20.6489	1587.82	WT_rep2_peak_1415
chr11	76312866	76313015	150	76312953	176.29	56.2413	4.32404	52.8649	WT_rep2_peak_1416
chr11	76670221	76671002	782	76670352	156.57	92.2224	8.75386	88.6795	WT_rep2_peak_1417
chr11	76672475	76673205	731	76672832	272.55	241.292	18.2365	237.349	WT_rep2_peak_1418
chr11	76936477	76937292	816	76937115	324.74	119.353	5.08963	115.713	WT_rep2_peak_1419
chr11	77079928	77080089	162	77080025	56.83	17.7508	3.95384	14.6903	WT_rep2_peak_1420
chr11	77090770	77091007	238	77090902	226.74	186.2	15.5706	182.374	WT_rep2_peak_1421
chr11	77184902	77185149	248	77185026	81.18	12.2727	2.41718	9.2969	WT_rep2_peak_1422
chr11	77340611	77340798	188	77340679	92.78	44.4168	6.41199	41.1129	WT_rep2_peak_1423
chr11	77344288	77345160	873	77344521	212.24	121.39	8.52954	117.744	WT_rep2_peak_1424
chr11	77345426	77346559	1134	77346201	799.08	738.374	21.0548	733.842	WT_rep2_peak_1425
chr11	77348660	77348847	188	77348790	85.82	37.8214	5.78822	34.5689	WT_rep2_peak_1426
chr11	77360292	77360486	195	77360412	122.36	71.4243	8.43402	67.9677	WT_rep2_peak_1427
chr11	77428539	77428929	391	77428781	406.5	129.132	4.42935	125.462	WT_rep2_peak_1428
chr11	77582342	77583228	887	77582800	441.87	430.481	23.1266	426.253	WT_rep2_peak_1429
chr11	77583478	77584066	589	77583928	147.29	83.6316	8.2384	80.1225	WT_rep2_peak_1430
chr11	77596206	77596355	150	77596280	40.01	8.76489	2.80406	5.85521	WT_rep2_peak_1431
chr11	77600391	77601054	664	77600526	245.87	187.59	13.7151	183.761	WT_rep2_peak_1432
chr11	77668705	77669236	532	77668912	270.23	95.4065	4.84334	91.8494	WT_rep2_peak_1433
chr11	77844532	77844834	303	77844737	244.13	56.61	3.35798	53.2301	WT_rep2_peak_1434
chr11	77913857	77914463	607	77913968	139.75	88.1911	9.62345	84.6627	WT_rep2_peak_1435
chr11	77920342	77920662	321	77920488	84.66	37.8714	5.85693	34.6154	WT_rep2_peak_1436
chr11	78044722	78045242	521	78045096	86.98	39.4785	6.01552	36.2095	WT_rep2_peak_1437
chr11	78045557	78046106	550	78045677	135.11	84.1615	9.30627	80.6492	WT_rep2_peak_1438
chr11	78050619	78050984	366	78050768	80.02	34.7183	5.53974	31.4876	WT_rep2_peak_1439
chr11	78123005	78123154	150	78123018	151.35	20.1393	2.34385	17.0526	WT_rep2_peak_1440
chr11	78145695	78145888	194	78145751	62.05	21.6462	4.31067	18.5398	WT_rep2_peak_1441
chr11	78162671	78163191	521	78162772	451.73	312.753	11.914	308.69	WT_rep2_peak_1442
chr11	78180560	78181028	469	78180898	348.51	232.281	11.0605	228.356	WT_rep2_peak_1443
chr11	78432136	78432285	150	78432209	78.86	33.1733	5.46045	29.9546	WT_rep2_peak_1444
chr11	78568059	78568220	162	78568145	46.39	11.8714	3.24018	8.89882	WT_rep2_peak_1445
chr11	78641428	78641906	479	78641588	143.81	92.2701	9.90098	88.7253	WT_rep2_peak_1446
chr11	78906950	78907315	366	78907090	243.55	137.149	8.43284	133.454	WT_rep2_peak_1447
chr11	78907558	78908063	506	78907669	162.95	81.9791	7.12818	78.4771	WT_rep2_peak_1448
chr11	79130963	79131112	150	79131108	38.27	7.80868	2.68511	4.91926	WT_rep2_peak_1449
chr11	79392425	79393808	1384	79393069	478.41	426.873	19.1763	422.649	WT_rep2_peak_1450
chr11	79417803	79418458	656	79417978	536.4	631.295	36.7424	626.855	WT_rep2_peak_1451
chr11	79469284	79469737	454	79469555	276.03	136.727	7.10323	133.032	WT_rep2_peak_1452
chr11	79583450	79583914	465	79583688	201.8	105.504	7.56719	101.91	WT_rep2_peak_1453
chr11	79825785	79826483	699	79826317	91.62	40.3326	5.78888	37.0586	WT_rep2_peak_1454
chr11	79826700	79826850	151	79826748	90.46	16.8754	2.77159	13.8309	WT_rep2_peak_1455
chr11	79922840	79923128	289	79923029	158.89	107.984	10.9318	104.381	WT_rep2_peak_1456
chr11	80030726	80030931	206	80030831	48.71	12.9807	3.39877	9.99094	WT_rep2_peak_1457
chr11	80251897	80252230	334	80252146	45.23	9.12131	2.71948	6.20827	WT_rep2_peak_1458
chr11	80286344	80286658	315	80286496	303.28	265.282	17.8989	261.295	WT_rep2_peak_1459
chr11	80362813	80363136	324	80362992	91.04	43.5819	6.29305	40.2843	WT_rep2_peak_1460
chr11	80369265	80369919	655	80369435	551.47	437.796	15.3039	433.559	WT_rep2_peak_1461
chr11	80370314	80370524	211	80370394	139.17	73.149	7.37752	69.6868	WT_rep2_peak_1462
chr11	80370697	80371618	922	80371327	1875.35	2058.6	32.3509	2053.32	WT_rep2_peak_1463
chr11	80771178	80771990	813	80771863	254.57	192.216	13.4511	188.377	WT_rep2_peak_1464
chr11	81016452	81016949	498	81016896	49.29	13.5484	3.43842	10.5486	WT_rep2_peak_1465
chr11	81043548	81043822	275	81043676	83.5	37.0754	5.77763	33.8259	WT_rep2_peak_1466
chr11	81044097	81044255	159	81044214	35.95	6.4551	2.52652	3.59953	WT_rep2_peak_1467
chr11	82335873	82336231	359	82336101	65.53	23.6869	4.54855	20.5589	WT_rep2_peak_1468
chr11	82655548	82656394	847	82656067	289.94	266.71	19.8922	262.721	WT_rep2_peak_1469
chr11	82656801	82656951	151	82656812	67.27	25.0799	4.6675	21.9363	WT_rep2_peak_1470
chr11	82674350	82674656	307	82674558	74.81	21.6154	3.79027	18.5135	WT_rep2_peak_1471
chr11	82692490	82692686	197	82692574	69.01	26.4981	4.78644	23.3411	WT_rep2_peak_1472
chr11	83395598	83395838	241	83395766	121.2	12.7711	2.07112	9.7888	WT_rep2_peak_1473
chr11	83672005	83672261	257	83672136	49.29	13.5484	3.43842	10.5486	WT_rep2_peak_1474
chr11	83852694	83852952	259	83852822	94.52	46.1004	6.53093	42.7859	WT_rep2_peak_1475
chr11	83899378	83900573	1196	83899568	222.68	99.1971	6.21324	95.6265	WT_rep2_peak_1476
chr11	83931586	83932178	593	83931816	282.4	257.445	19.3768	253.472	WT_rep2_peak_1477
chr11	83932521	83932955	435	83932818	107.86	44.1853	5.44295	40.8856	WT_rep2_peak_1478
chr11	83939527	83940016	490	83939883	127	75.283	8.7512	71.8087	WT_rep2_peak_1479
chr11	83970097	83970479	383	83970229	79.44	33.9432	5.5001	30.7193	WT_rep2_peak_1480
chr11	84290739	84291051	313	84290942	202.38	102.91	7.26359	99.3256	WT_rep2_peak_1481
chr11	84761967	84762116	150	84762019	63.21	22.3198	4.38996	19.2056	WT_rep2_peak_1482
chr11	84879217	84879644	428	84879339	226.74	177.322	14.2335	173.518	WT_rep2_peak_1483
chr11	85081490	85082000	511	85081788	226.74	160.645	11.9861	156.884	WT_rep2_peak_1484
chr11	85082260	85082727	468	85082383	107.86	57.4701	7.44283	54.0849	WT_rep2_peak_1485
chr11	85236486	85236984	499	85236712	95.1	46.949	6.57058	43.6283	WT_rep2_peak_1486
chr11	86098608	86098757	150	86098717	48.71	12.9807	3.39877	9.99094	WT_rep2_peak_1487
chr11	86189127	86189607	481	86189445	485.37	550.983	33.2534	546.624	WT_rep2_peak_1488
chr11	86210327	86210916	590	86210485	323.58	268.269	16.2288	264.277	WT_rep2_peak_1489
chr11	86393029	86393723	695	86393176	380.99	393.263	26.1169	389.082	WT_rep2_peak_1490
chr11	86580382	86580951	570	86580508	110.18	60.1927	7.60142	56.7929	WT_rep2_peak_1491
chr11	86831385	86831591	207	86831509	56.83	17.7508	3.95384	14.6903	WT_rep2_peak_1492
chr11	86971182	86971427	246	86971310	85.24	38.6725	5.89657	35.4099	WT_rep2_peak_1493
chr11	86976040	86976356	317	86976142	69.01	26.4981	4.78644	23.3411	WT_rep2_peak_1494
chr11	87012722	87012925	204	87012807	66.69	24.3802	4.62785	21.2442	WT_rep2_peak_1495
chr11	87117861	87118163	303	87117929	89.3	13.5226	2.44061	10.5288	WT_rep2_peak_1496
chr11	87122069	87122758	690	87122298	3041.51	3170.28	28.6219	3164.6	WT_rep2_peak_1497
chr11	87153801	87153968	168	87153893	42.91	9.76189	3.0023	6.8289	WT_rep2_peak_1498
chr11	87184407	87184564	158	87184473	39.43	8.28157	2.76441	5.38395	WT_rep2_peak_1499
chr11	87501752	87502325	574	87501956	282.4	218.91	14.1702	215.011	WT_rep2_peak_1500
chr11	87505587	87505845	259	87505710	125.26	59.0507	6.39268	55.6593	WT_rep2_peak_1501
chr11	87675789	87675938	150	87675822	83.5	37.0754	5.77763	33.8259	WT_rep2_peak_1502
chr11	87871911	87872228	318	87872216	189.04	17.6231	2.00045	14.5685	WT_rep2_peak_1503
chr11	87941722	87942163	442	87942032	283.56	198.25	11.8569	194.397	WT_rep2_peak_1504
chr11	87964134	87964288	155	87964205	64.37	23.0001	4.46926	19.8778	WT_rep2_peak_1505
chr11	88083491	88083744	254	88083615	173.39	124.31	11.923	120.654	WT_rep2_peak_1506
chr11	88084304	88084636	333	88084395	70.17	27.2164	4.86573	24.0517	WT_rep2_peak_1507
chr11	88101604	88101968	365	88101676	62.63	21.6462	4.35032	18.5398	WT_rep2_peak_1508
chr11	88735839	88736228	390	88736071	141.49	39.9447	3.85115	36.6739	WT_rep2_peak_1509
chr11	88871977	88872159	183	88872077	60.89	20.3195	4.23137	17.2272	WT_rep2_peak_1510
chr11	88930657	88931734	1078	88931157	1133.1	1692.91	77.5398	1687.78	WT_rep2_peak_1511
chr11	89926364	89926808	445	89926641	207.02	163.322	14.2226	159.553	WT_rep2_peak_1512
chr11	90228898	90229248	351	90229145	66.69	24.3802	4.62785	21.2442	WT_rep2_peak_1513
chr11	90278760	90279020	261	90278850	60.89	12.8609	2.94705	9.87789	WT_rep2_peak_1514
chr11	92990614	92991030	417	92990747	111.34	32.2507	3.87373	29.0433	WT_rep2_peak_1515
chr11	93491739	93491893	155	93491857	82.92	36.2845	5.73798	33.0401	WT_rep2_peak_1516
chr11	93994896	93995063	168	93994975	98	35.7573	4.71433	32.5186	WT_rep2_peak_1517
chr11	94016318	94016528	211	94016427	248.77	146.457	9.01702	142.735	WT_rep2_peak_1518
chr11	94104372	94105503	1132	94104732	216.88	159.959	12.8163	156.199	WT_rep2_peak_1519
chr11	94178906	94179354	449	94179047	79.44	33.9432	5.5001	30.7193	WT_rep2_peak_1520
chr11	94182366	94182516	151	94182388	84.66	12.1797	2.37954	9.20466	WT_rep2_peak_1521
chr11	94184070	94184221	152	94184112	193.68	45.0889	3.35659	41.7827	WT_rep2_peak_1522
chr11	94186805	94187033	229	94186895	623.96	289.475	6.71998	285.448	WT_rep2_peak_1523
chr11	94187715	94188123	409	94187976	1566.85	859.017	8.47489	854.387	WT_rep2_peak_1524
chr11	94229162	94229340	179	94229208	78.86	33.1733	5.46045	29.9546	WT_rep2_peak_1525
chr11	94230324	94231275	952	94230814	859.97	819.438	22.6572	814.839	WT_rep2_peak_1526
chr11	94299991	94300568	578	94300194	143.23	90.7379	9.61547	87.2006	WT_rep2_peak_1527
chr11	94550560	94550904	345	94550773	69.01	26.4981	4.78644	23.3411	WT_rep2_peak_1528
chr11	94555214	94555600	387	94555358	100.32	51.2586	6.92741	47.9099	WT_rep2_peak_1529
chr11	94882008	94882204	197	94882102	502.18	103.774	3.14489	100.186	WT_rep2_peak_1530
chr11	94882402	94882899	498	94882794	416.94	69.0038	2.72717	65.5606	WT_rep2_peak_1531
chr11	94883100	94883723	624	94883509	15748	20096.2	50.148	20088.6	WT_rep2_peak_1532
chr11	94887214	94887442	229	94887354	1259.51	832.265	11.2546	827.656	WT_rep2_peak_1533
chr11	94897280	94897707	428	94897566	372.29	104.57	3.95851	100.98	WT_rep2_peak_1534
chr11	94935569	94935868	300	94935843	59.73	19.6665	4.15208	16.5826	WT_rep2_peak_1535
chr11	95282346	95282570	225	95282438	106.7	31.859	3.98886	28.6533	WT_rep2_peak_1536
chr11	95382517	95383636	1120	95382936	2508.59	3320.58	54.9144	3314.86	WT_rep2_peak_1537
chr11	95401483	95401725	243	95401613	102.64	53.0126	7.086	49.6538	WT_rep2_peak_1538
chr11	95570954	95571574	621	95571078	196.58	150.416	13.5089	146.682	WT_rep2_peak_1539
chr11	95640225	95640901	677	95640500	231.95	51.8019	3.28105	48.4515	WT_rep2_peak_1540
chr11	95654551	95655340	790	95655059	716.16	895.057	43.9975	890.397	WT_rep2_peak_1541
chr11	95722363	95722588	226	95722510	87.56	26.9168	4.02559	23.7577	WT_rep2_peak_1542
chr11	96709550	96711207	1658	96709777	2912.19	2285.65	15.4137	2280.29	WT_rep2_peak_1543
chr11	96718166	96719141	976	96718864	734.72	550.636	13.8814	546.278	WT_rep2_peak_1544
chr11	96854954	96855156	203	96855048	58.57	19.0207	4.07278	15.9453	WT_rep2_peak_1545
chr11	97079458	97079771	314	97079664	45.81	11.3301	3.20053	8.36762	WT_rep2_peak_1546
chr11	97097587	97097817	231	97097722	233.11	185.636	14.6321	181.812	WT_rep2_peak_1547
chr11	97219353	97219885	533	97219743	218.62	156.896	12.201	153.145	WT_rep2_peak_1548
chr11	97342469	97343097	629	97342596	105.54	42.6783	5.32697	39.3889	WT_rep2_peak_1549
chr11	97392022	97392241	220	97392240	42.33	5.26558	2.06342	2.45076	WT_rep2_peak_1550
chr11	97402606	97403132	527	97402745	1044.38	1197.43	35.6176	1192.57	WT_rep2_peak_1551
chr11	97410598	97410855	258	97410711	131.63	58.5613	6.02883	55.1712	WT_rep2_peak_1552
chr11	97518257	97519312	1056	97519064	418.68	252.653	9.53814	248.689	WT_rep2_peak_1553
chr11	97607789	97609421	1633	97607978	1681.09	1134.16	11.6812	1129.34	WT_rep2_peak_1554
chr11	97637749	97638044	296	97637895	400.7	422.43	27.4649	418.212	WT_rep2_peak_1555
chr11	97733068	97733219	152	97733194	162.95	34.9558	3.15285	31.724	WT_rep2_peak_1556
chr11	97893768	97894110	343	97893984	325.32	165.487	7.41628	161.714	WT_rep2_peak_1557
chr11	97980276	97980451	176	97980413	53.35	15.9023	3.71595	12.8665	WT_rep2_peak_1558
chr11	98045950	98046865	916	98046381	448.25	396.136	18.7188	391.952	WT_rep2_peak_1559
chr11	98048524	98048892	369	98048757	129.89	16.0556	2.2568	13.0185	WT_rep2_peak_1560
chr11	98094412	98094737	326	98094554	297.48	73.5532	3.55336	70.0877	WT_rep2_peak_1561
chr11	98101322	98101940	619	98101652	311.98	296.298	21.3988	292.26	WT_rep2_peak_1562
chr11	98140595	98140744	150	98140659	44.65	10.7979	3.12124	7.84597	WT_rep2_peak_1563
chr11	98141027	98141210	184	98141150	102.64	49.3053	6.4775	45.9718	WT_rep2_peak_1564
chr11	98216465	98216696	232	98216475	65.53	16.4459	3.32636	13.4068	WT_rep2_peak_1565
chr11	98216893	98219075	2183	98218980	505.08	345.703	11.6878	341.593	WT_rep2_peak_1566
chr11	98271490	98271758	269	98271628	46.39	11.8714	3.24018	8.89882	WT_rep2_peak_1567
chr11	98655820	98655985	166	98655889	288.2	82.3462	3.98874	78.8414	WT_rep2_peak_1568
chr11	98687098	98687255	158	98687240	263.27	39.3899	2.54104	36.1246	WT_rep2_peak_1569
chr11	98689849	98690160	312	98689967	434.92	139.839	4.49397	136.136	WT_rep2_peak_1570
chr11	98690691	98691741	1051	98690963	2566.58	4018.32	95.0955	4012.43	WT_rep2_peak_1571
chr11	98697196	98697496	301	98697228	51.03	14.709	3.55736	11.6927	WT_rep2_peak_1572
chr11	98783018	98783507	490	98783368	275.45	120.886	6.14325	117.242	WT_rep2_peak_1573
chr11	98790757	98790999	243	98790865	95.68	43.1827	5.98646	39.8901	WT_rep2_peak_1574
chr11	98794004	98794153	150	98794060	53.93	12.143	3.05164	9.16819	WT_rep2_peak_1575
chr11	98864294	98864757	464	98864618	55.67	17.127	3.87454	14.0756	WT_rep2_peak_1576
chr11	99101008	99101159	152	99101050	70.17	8.18462	2.09313	5.29155	WT_rep2_peak_1577
chr11	99313411	99313776	366	99313656	79.44	33.9432	5.5001	30.7193	WT_rep2_peak_1578
chr11	99314502	99315609	1108	99315211	109.02	59.2812	7.52213	55.8868	WT_rep2_peak_1579
chr11	100239949	100240432	484	100240106	173.39	26.2707	2.52734	23.119	WT_rep2_peak_1580
chr11	100353455	100355287	1833	100354834	1133.68	1081.81	22.8766	1077.02	WT_rep2_peak_1581
chr11	100469603	100469790	188	100469735	127.58	62.6634	6.76711	59.2527	WT_rep2_peak_1582
chr11	100595804	100596117	314	100595971	60.31	14.8034	3.22675	11.786	WT_rep2_peak_1583
chr11	100913904	100914063	160	100913960	108.44	44.9448	5.47194	41.6391	WT_rep2_peak_1584
chr11	100988741	100989218	478	100989089	164.11	80.9733	6.8795	77.4757	WT_rep2_peak_1585
chr11	101016857	101017119	263	101016975	49.29	10.1695	2.79391	7.2331	WT_rep2_peak_1586
chr11	101168923	101169217	295	101169100	153.09	60.7014	5.31345	57.3	WT_rep2_peak_1587
chr11	101212632	101212784	153	101212762	51.61	9.47265	2.6305	6.54934	WT_rep2_peak_1588
chr11	101216196	101216453	258	101216299	54.51	16.5108	3.79525	13.4685	WT_rep2_peak_1589
chr11	101324300	101325182	883	101325070	90.46	42.7516	6.2534	39.4605	WT_rep2_peak_1590
chr11	101325700	101326400	701	101326254	129.89	78.2128	8.94944	74.7256	WT_rep2_peak_1591
chr11	101471589	101471927	339	101471697	196	64.7755	4.47731	61.3536	WT_rep2_peak_1592
chr11	101557632	101558216	585	101557980	167.59	117.71	11.5265	114.075	WT_rep2_peak_1593
chr11	101628937	101629257	321	101629064	93.94	19.141	2.96693	16.065	WT_rep2_peak_1594
chr11	101657645	101658116	472	101657888	116.56	65.7421	8.03755	62.3139	WT_rep2_peak_1595
chr11	101864056	101864791	736	101864450	2750.4	2601.68	22.7389	2596.21	WT_rep2_peak_1596
chr11	102181799	102182627	829	102182368	847.21	889.941	28.321	885.286	WT_rep2_peak_1597
chr11	102196613	102197289	677	102197211	125.84	32.981	3.6187	29.7665	WT_rep2_peak_1598
chr11	102327837	102329011	1175	102328453	568.87	547.386	22.7948	543.032	WT_rep2_peak_1599
chr11	102329267	102329416	150	102329286	74.81	13.5793	2.70734	10.5794	WT_rep2_peak_1600
chr11	102368921	102369197	277	102368962	49.29	13.5484	3.43842	10.5486	WT_rep2_peak_1601
chr11	102369748	102370300	553	102370063	84.66	22.5572	3.56931	19.4414	WT_rep2_peak_1602
chr11	102371427	102371650	224	102371556	319.52	168.98	7.8175	165.198	WT_rep2_peak_1603
chr11	102371792	102372695	904	102372117	1051.91	901.743	18.1537	897.079	WT_rep2_peak_1604
chr11	102577085	102577338	254	102577293	98	49.5217	6.76882	46.1845	WT_rep2_peak_1605
chr11	102691125	102691274	150	102691239	42.33	9.76189	2.96265	6.8289	WT_rep2_peak_1606
chr11	102729339	102729588	250	102729465	153.67	64.7961	5.72852	61.374	WT_rep2_peak_1607
chr11	102956540	102957510	971	102956817	135.69	66.3074	6.767	62.8774	WT_rep2_peak_1608
chr11	102958200	102958559	360	102958346	167.59	83.5575	7.02447	80.0485	WT_rep2_peak_1609
chr11	102959447	102959641	195	102959585	121.78	22.2002	2.79037	19.0908	WT_rep2_peak_1610
chr11	103007454	103007880	427	103007596	982.91	377.816	5.43596	373.659	WT_rep2_peak_1611
chr11	103008027	103009069	1043	103008772	1681.09	2115.44	46.7248	2110.14	WT_rep2_peak_1612
chr11	103285733	103285966	234	103285908	98.58	49.5217	6.80847	46.1845	WT_rep2_peak_1613
chr11	103540728	103541294	567	103541167	757.91	423.008	8.624	418.79	WT_rep2_peak_1614
chr11	103569699	103570029	331	103569830	69.59	26.4981	4.82609	23.3411	WT_rep2_peak_1615
chr11	104193747	104193935	189	104193861	109.02	19.9344	2.75047	16.8488	WT_rep2_peak_1616
chr11	104220750	104221604	855	104221234	1586.57	1329.77	17.4458	1324.83	WT_rep2_peak_1617
chr11	104314710	104315821	1112	104314926	375.77	291.865	14.491	287.834	WT_rep2_peak_1618
chr11	104395944	104396441	498	104396238	418.1	373.537	19.0499	369.386	WT_rep2_peak_1619
chr11	105070702	105071211	510	105071066	113.08	62.9504	7.79966	59.5363	WT_rep2_peak_1620
chr11	105171987	105172576	590	105172294	290.52	268.04	19.9318	264.049	WT_rep2_peak_1621
chr11	105757978	105758497	520	105758356	191.94	144.637	13.1917	140.919	WT_rep2_peak_1622
chr11	105812503	105813202	700	105812966	106.12	48.2034	6.01794	44.8753	WT_rep2_peak_1623
chr11	105813703	105814811	1109	105814113	583.95	284.297	7.13349	280.279	WT_rep2_peak_1624
chr11	105818496	105818964	469	105818644	60.89	15.8929	3.43823	12.8626	WT_rep2_peak_1625
chr11	105819113	105819265	153	105819138	110.76	60.1927	7.64107	56.7929	WT_rep2_peak_1626
chr11	105949332	105949662	331	105949542	74.81	21.6154	3.79027	18.5135	WT_rep2_peak_1627
chr11	105964026	105964399	374	105964067	58.57	19.0207	4.07278	15.9453	WT_rep2_peak_1628
chr11	106045027	106045342	316	106045250	58.57	19.0207	4.07278	15.9453	WT_rep2_peak_1629
chr11	106054622	106054812	191	106054674	80.02	26.7962	4.26444	23.6376	WT_rep2_peak_1630
chr11	106138466	106139113	648	106138765	1229.94	796.407	10.8933	791.826	WT_rep2_peak_1631
chr11	106140170	106140441	272	106140317	199.48	90.015	6.26503	86.4804	WT_rep2_peak_1632
chr11	106394206	106394355	150	106394220	56.25	14.7825	3.36759	11.7655	WT_rep2_peak_1633
chr11	106457875	106458355	481	106458208	284.14	173.248	9.50482	169.454	WT_rep2_peak_1634
chr11	106458886	106459133	248	106459035	70.17	27.2164	4.86573	24.0517	WT_rep2_peak_1635
chr11	106925909	106926556	648	106926472	206.44	143.707	11.5244	139.992	WT_rep2_peak_1636
chr11	106963677	106964740	1064	106963819	192.52	107.583	8.235	103.982	WT_rep2_peak_1637
chr11	106990476	106990755	280	106990614	293.42	160.834	8.17841	157.073	WT_rep2_peak_1638
chr11	107001643	107002381	739	107002249	202.38	157.424	13.9054	153.671	WT_rep2_peak_1639
chr11	107102634	107103408	775	107102831	161.21	111.202	11.0904	107.588	WT_rep2_peak_1640
chr11	107388424	107388574	151	107388462	59.73	17.7473	3.79552	14.6903	WT_rep2_peak_1641
chr11	107563364	107563790	427	107563673	168.17	118.803	11.5662	115.165	WT_rep2_peak_1642
chr11	107624308	107624864	557	107624723	454.63	380.973	16.8752	376.81	WT_rep2_peak_1643
chr11	107827228	107827965	738	107827363	118.88	52.9811	6.02396	49.6252	WT_rep2_peak_1644
chr11	107828116	107828596	481	107828447	101.48	44.5532	5.80624	41.2489	WT_rep2_peak_1645
chr11	107829385	107829791	407	107829517	71.33	22.5339	4.02931	19.4183	WT_rep2_peak_1646
chr11	108814352	108814598	247	108814496	165.27	115.53	11.368	111.902	WT_rep2_peak_1647
chr11	108840213	108840555	343	108840415	85.24	38.6725	5.89657	35.4099	WT_rep2_peak_1648
chr11	109286698	109287379	682	109287083	292.26	270.704	20.0508	266.708	WT_rep2_peak_1649
chr11	109380823	109381337	515	109380967	49.29	13.5484	3.43842	10.5486	WT_rep2_peak_1650
chr11	109563770	109564133	364	109563907	83.5	37.0754	5.77763	33.8259	WT_rep2_peak_1651
chr11	110403526	110403758	233	110403633	52.19	15.3017	3.63666	12.2754	WT_rep2_peak_1652
chr11	110915995	110916513	519	110916144	139.75	88.1911	9.62345	84.6627	WT_rep2_peak_1653
chr11	110963220	110964099	880	110963635	219.2	177.688	15.0552	173.882	WT_rep2_peak_1654
chr11	112676121	112677161	1041	112676516	246.45	211.025	16.9186	207.143	WT_rep2_peak_1655
chr11	112934838	112935989	1152	112935874	102.64	53.0126	7.086	49.6538	WT_rep2_peak_1656
chr11	113546896	113547276	381	113547037	59.73	19.6665	4.15208	16.5826	WT_rep2_peak_1657
chr11	113552543	113552773	231	113552681	74.81	30.1491	5.18292	26.9565	WT_rep2_peak_1658
chr11	113553885	113554202	318	113553928	85.82	17.9214	2.9939	14.8599	WT_rep2_peak_1659
chr11	113579486	113579692	207	113579627	40.59	8.76489	2.84371	5.85521	WT_rep2_peak_1660
chr11	113618396	113618750	355	113618621	52.19	9.1639	2.53285	6.25058	WT_rep2_peak_1661
chr11	113618925	113619844	920	113619513	119.46	68.567	8.23578	65.1252	WT_rep2_peak_1662
chr11	113671424	113671687	264	113671560	93.94	45.2563	6.49129	41.9463	WT_rep2_peak_1663
chr11	114682158	114682324	167	114682192	67.27	25.0799	4.6675	21.9363	WT_rep2_peak_1664
chr11	115135916	115136383	468	115136055	104.38	54.7833	7.20495	51.4133	WT_rep2_peak_1665
chr11	115140294	115140616	323	115140488	77.7	32.409	5.38115	29.1972	WT_rep2_peak_1666
chr11	115284405	115285040	636	115284633	142.07	91.2458	9.78204	87.7052	WT_rep2_peak_1667
chr11	115301326	115301733	408	115301660	96.84	46.822	6.52274	43.5048	WT_rep2_peak_1668
chr11	115321344	115322084	741	115321943	238.91	201.007	16.4032	197.147	WT_rep2_peak_1669
chr11	115426053	115426248	196	115426167	104.96	54.7833	7.24459	51.4133	WT_rep2_peak_1670
chr11	115497660	115498287	628	115498050	106.7	56.5704	7.36353	53.1907	WT_rep2_peak_1671
chr11	115498939	115499182	244	115499036	48.71	12.9807	3.39877	9.99094	WT_rep2_peak_1672
chr11	115506078	115506237	160	115506124	283.56	129.727	6.46738	126.055	WT_rep2_peak_1673
chr11	115536302	115536773	472	115536722	316.04	160.423	7.37298	156.663	WT_rep2_peak_1674
chr11	115691802	115691969	168	115691858	75.97	30.8968	5.26221	27.697	WT_rep2_peak_1675
chr11	115855176	115855628	453	115855485	137.43	86.17	9.46486	82.6501	WT_rep2_peak_1676
chr11	116058432	116058950	519	116058703	377.51	388.927	25.879	384.753	WT_rep2_peak_1677
chr11	116063909	116064058	150	116064039	45.23	9.72044	2.83627	6.79508	WT_rep2_peak_1678
chr11	116228815	116229580	766	116229095	1977.41	2579.39	52.2009	2573.93	WT_rep2_peak_1679
chr11	116428815	116429000	186	116428912	90.46	20.4431	3.15387	17.35	WT_rep2_peak_1680
chr11	116429855	116430350	496	116430140	1318.66	1396.11	29.3258	1391.14	WT_rep2_peak_1681
chr11	116877478	116877661	184	116877603	82.34	35.4686	5.55626	32.2347	WT_rep2_peak_1682
chr11	117047783	117048333	551	117047830	209.92	70.5289	4.6002	67.0769	WT_rep2_peak_1683
chr11	117611681	117614377	2697	117613724	979.43	1132.29	36.3122	1127.47	WT_rep2_peak_1684
chr11	117651620	117652001	382	117651876	68.43	25.7859	4.74679	22.6367	WT_rep2_peak_1685
chr11	117652741	117653044	304	117652875	204.12	157.528	13.6747	153.774	WT_rep2_peak_1686
chr11	117653215	117653600	386	117653335	213.4	109.742	7.39305	106.134	WT_rep2_peak_1687
chr11	118154612	118154761	150	118154670	85.24	21.9697	3.44973	18.8618	WT_rep2_peak_1688
chr11	118155641	118155925	285	118155736	104.38	54.7833	7.20495	51.4133	WT_rep2_peak_1689
chr11	118298208	118298849	642	118298712	90.46	21.4527	3.26651	18.3518	WT_rep2_peak_1690
chr11	118301792	118301977	186	118301846	58.57	19.0207	4.07278	15.9453	WT_rep2_peak_1691
chr11	118381818	118382132	315	118382023	421	254.634	9.59086	250.666	WT_rep2_peak_1692
chr11	118529768	118530041	274	118529879	100.32	25.8328	3.49381	22.6834	WT_rep2_peak_1693
chr11	118929478	118929853	376	118929613	121.78	70.4683	8.39437	67.0165	WT_rep2_peak_1694
chr11	118971072	118972771	1700	118972680	497.54	383.134	14.4087	378.969	WT_rep2_peak_1695
chr11	119161013	119161353	341	119161228	195.42	50.6296	3.63744	47.2858	WT_rep2_peak_1696
chr11	119398292	119398614	323	119398337	65.53	23.6869	4.54855	20.5589	WT_rep2_peak_1697
chr11	119433063	119433342	280	119433123	401.28	126.934	4.40615	123.27	WT_rep2_peak_1698
chr11	119789456	119789654	199	119789510	55.09	17.127	3.8349	14.0756	WT_rep2_peak_1699
chr11	119790005	119790197	193	119790075	110.76	46.4756	5.58792	43.1597	WT_rep2_peak_1700
chr11	119892153	119892759	607	119892320	922.02	644.71	12.3069	640.258	WT_rep2_peak_1701
chr11	119901299	119901649	351	119901504	237.17	86.2083	4.96195	82.6883	WT_rep2_peak_1702
chr11	119901796	119901983	188	119901847	116.56	22.3087	2.86376	19.1989	WT_rep2_peak_1703
chr11	119902266	119903083	818	119902687	1087.87	862.527	15.5552	857.894	WT_rep2_peak_1704
chr11	119981906	119982133	228	119982002	37.11	7.34647	2.60582	4.46935	WT_rep2_peak_1705
chr11	119995680	119996583	904	119996445	114.82	20.6138	2.75756	17.5199	WT_rep2_peak_1706
chr11	120167115	120167394	280	120167256	85.24	35.6729	5.39021	32.4346	WT_rep2_peak_1707
chr11	120273155	120273304	150	120273171	86.98	13.6409	2.5138	10.6407	WT_rep2_peak_1708
chr11	120356137	120356309	173	120356303	55.09	15.3735	3.50558	12.3464	WT_rep2_peak_1709
chr11	120379106	120379565	460	120379424	204.7	152.647	12.9779	148.908	WT_rep2_peak_1710
chr11	120500924	120501423	500	120501048	296.32	276.049	20.3283	272.044	WT_rep2_peak_1711
chr11	120519778	120519995	218	120519848	40.59	8.76489	2.84371	5.85521	WT_rep2_peak_1712
chr11	120520139	120520289	151	120520201	96.84	36.1023	4.89205	32.8622	WT_rep2_peak_1713
chr11	120697919	120698082	164	120698052	194.84	148.098	13.39	144.37	WT_rep2_peak_1714
chr11	120853737	120853886	150	120853767	52.19	10.7446	2.79946	7.79976	WT_rep2_peak_1715
chr11	120854330	120854778	449	120854549	382.73	320.102	16.6837	316.028	WT_rep2_peak_1716
chr11	121113263	121113453	191	121113328	149.61	98.4782	10.2975	94.9093	WT_rep2_peak_1717
chr11	121114090	121114369	280	121114179	42.91	9.76189	3.0023	6.8289	WT_rep2_peak_1718
chr11	121143747	121143896	150	121143855	68.43	25.7859	4.74679	22.6367	WT_rep2_peak_1719
chr11	121197521	121198360	840	121197950	1149.34	1374.58	40.0117	1369.62	WT_rep2_peak_1720
chr11	121247532	121247708	177	121247650	65.53	23.6869	4.54855	20.5589	WT_rep2_peak_1721
chr11	121606668	121606832	165	121606721	106.12	56.5704	7.32389	53.1907	WT_rep2_peak_1722
chr12	3284447	3284734	288	3284720	50.45	14.1246	3.51771	11.1181	WT_rep2_peak_1723
chr12	3416914	3417120	207	3417057	262.69	54.0674	3.10222	50.7024	WT_rep2_peak_1724
chr12	3550169	3550486	318	3550403	86.4	39.4785	5.97587	36.2095	WT_rep2_peak_1725
chr12	3550943	3552244	1302	3551510	184.4	136.642	12.6763	132.947	WT_rep2_peak_1726
chr12	3957599	3957889	291	3957750	1040.32	1151.92	32.5412	1147.08	WT_rep2_peak_1727
chr12	4012891	4013054	164	4013019	64.95	14.9291	3.14784	11.9107	WT_rep2_peak_1728
chr12	4015893	4016516	624	4016236	154.25	93.9434	9.13235	90.3925	WT_rep2_peak_1729
chr12	4184661	4184881	221	4184735	82.92	36.2845	5.73798	33.0401	WT_rep2_peak_1730
chr12	4297599	4298385	787	4298029	390.26	322.954	16.3027	318.876	WT_rep2_peak_1731
chr12	4298826	4299776	951	4299553	286.46	192.007	11.0563	188.168	WT_rep2_peak_1732
chr12	4345000	4345789	790	4345138	349.67	172.44	7.15657	168.648	WT_rep2_peak_1733
chr12	4516868	4517268	401	4516988	47.55	12.4216	3.31948	9.44188	WT_rep2_peak_1734
chr12	4794877	4795303	427	4794993	59.15	19.6665	4.11243	16.5826	WT_rep2_peak_1735
chr12	4900851	4901052	202	4900919	88.14	41.1054	6.09481	37.8253	WT_rep2_peak_1736
chr12	4901578	4901792	215	4901719	52.19	15.3017	3.63666	12.2754	WT_rep2_peak_1737
chr12	4930539	4930689	151	4930669	77.12	32.409	5.34151	29.1972	WT_rep2_peak_1738
chr12	5081415	5081796	382	5081648	152.51	101.621	10.4957	98.0412	WT_rep2_peak_1739
chr12	5094073	5094436	364	5094145	88.72	41.1054	6.13446	37.8253	WT_rep2_peak_1740
chr12	5130815	5131190	376	5130923	70.17	27.2164	4.86573	24.0517	WT_rep2_peak_1741
chr12	8334138	8334377	240	8334229	61.47	20.9794	4.27102	17.8811	WT_rep2_peak_1742
chr12	8392106	8392321	216	8392235	84.66	37.8714	5.85693	34.6154	WT_rep2_peak_1743
chr12	8547920	8548570	651	8548304	1493.21	1604.69	30.4941	1599.61	WT_rep2_peak_1744
chr12	8548948	8549596	649	8549089	568.87	266.345	6.78415	262.356	WT_rep2_peak_1745
chr12	9630771	9630937	167	9630827	68.43	25.7859	4.74679	22.6367	WT_rep2_peak_1746
chr12	10444447	10445316	870	10445043	213.4	106.912	7.14661	103.315	WT_rep2_peak_1747
chr12	11141054	11141203	150	11141183	43.49	10.2751	3.04194	7.33445	WT_rep2_peak_1748
chr12	11142311	11142553	243	11142450	45.23	11.3301	3.16089	8.36762	WT_rep2_peak_1749
chr12	11376204	11376574	371	11376313	1729.8	1228.71	12.7829	1223.83	WT_rep2_peak_1750
chr12	12422815	12423253	439	12423162	260.37	147.457	8.51365	143.731	WT_rep2_peak_1751
chr12	12423415	12423802	388	12423561	143.81	31.0642	3.14808	27.8637	WT_rep2_peak_1752
chr12	12987042	12987192	151	12987124	81.18	35.4988	5.61904	32.261	WT_rep2_peak_1753
chr12	14198965	14200270	1306	14199621	435.49	326.38	13.6405	322.297	WT_rep2_peak_1754
chr12	14200462	14200841	380	14200600	133.95	35.2553	3.6474	32.0222	WT_rep2_peak_1755
chr12	15843218	15844122	905	15843595	516.1	516.137	24.6238	511.814	WT_rep2_peak_1756
chr12	16709735	16710173	439	16709937	369.97	148.597	5.62072	144.868	WT_rep2_peak_1757
chr12	16875603	16875886	284	16875672	70.75	27.2164	4.90538	24.0517	WT_rep2_peak_1758
chr12	17034559	17035134	576	17034834	1059.45	1551.86	72.5046	1546.81	WT_rep2_peak_1759
chr12	17224372	17225242	871	17224761	190.2	131.191	11.2472	127.514	WT_rep2_peak_1760
chr12	17841308	17841483	176	17841400	119.46	68.567	8.23578	65.1252	WT_rep2_peak_1761
chr12	20950671	20950857	187	20950796	68.43	25.7859	4.74679	22.6367	WT_rep2_peak_1762
chr12	21605697	21606044	348	21605771	59.73	19.6665	4.15208	16.5826	WT_rep2_peak_1763
chr12	21606226	21606544	319	21606287	53.35	15.9023	3.71595	12.8665	WT_rep2_peak_1764
chr12	21610940	21611416	477	21611378	40.01	8.76489	2.80406	5.85521	WT_rep2_peak_1765
chr12	21614386	21614752	367	21614636	45.23	11.3301	3.16089	8.36762	WT_rep2_peak_1766
chr12	24715927	24716102	176	24716066	77.7	32.409	5.38115	29.1972	WT_rep2_peak_1767
chr12	25008956	25009532	577	25009177	248.19	213.547	17.0376	209.66	WT_rep2_peak_1768
chr12	25107303	25108102	800	25107692	2002.93	1566.38	15.2738	1561.32	WT_rep2_peak_1769
chr12	25144208	25144631	424	25144324	198.32	138.901	11.5884	135.202	WT_rep2_peak_1770
chr12	26528203	26528655	453	26528462	111.92	61.1081	7.72036	57.7031	WT_rep2_peak_1771
chr12	27190817	27192021	1205	27191301	396.06	400.593	24.8164	396.402	WT_rep2_peak_1772
chr12	27391112	27391425	314	27391243	218.04	162.23	12.8846	158.464	WT_rep2_peak_1773
chr12	28797071	28797337	267	28797218	110.18	37.3614	4.44714	34.1109	WT_rep2_peak_1774
chr12	28917114	28917343	230	28917253	33.63	5.60964	2.36793	2.78141	WT_rep2_peak_1775
chr12	29861436	29861698	263	29861576	2594.41	1360.59	7.98589	1355.64	WT_rep2_peak_1776
chr12	29876743	29877774	1032	29877188	4254.05	5812.81	61.1797	5806.62	WT_rep2_peak_1777
chr12	29882141	29882294	154	29882281	288.78	35.3538	2.29987	32.1204	WT_rep2_peak_1778
chr12	29971145	29971295	151	29971282	51.61	14.709	3.59701	11.6927	WT_rep2_peak_1779
chr12	29971599	29971929	331	29971742	209.34	84.6875	5.53524	81.174	WT_rep2_peak_1780
chr12	30052360	30052589	230	30052465	66.11	24.3802	4.5882	21.2442	WT_rep2_peak_1781
chr12	31381608	31382224	617	31381713	78.86	27.0258	4.43692	23.866	WT_rep2_peak_1782
chr12	31537269	31537747	479	31537351	120.04	69.5159	8.27543	66.069	WT_rep2_peak_1783
chr12	31758701	31760066	1366	31759333	1033.36	1185.65	35.6675	1180.79	WT_rep2_peak_1784
chr12	31761677	31762632	956	31762354	1555.84	1574.28	26.387	1569.21	WT_rep2_peak_1785
chr12	31976573	31976841	269	31976618	82.92	18.2851	3.10829	15.2214	WT_rep2_peak_1786
chr12	32429543	32430266	724	32429935	333.43	326.559	22.8658	322.475	WT_rep2_peak_1787
chr12	32430454	32430603	150	32430555	60.89	20.3195	4.23137	17.2272	WT_rep2_peak_1788
chr12	33184725	33185353	629	33185155	327.64	318.242	22.4693	314.17	WT_rep2_peak_1789
chr12	33417166	33417315	150	33417239	42.91	9.76189	3.0023	6.8289	WT_rep2_peak_1790
chr12	33417605	33417801	197	33417709	157.15	106.916	10.8129	103.317	WT_rep2_peak_1791
chr12	33425158	33425475	318	33425263	63.21	22.3198	4.38996	19.2056	WT_rep2_peak_1792
chr12	33487634	33488056	423	33487890	335.75	329.341	23.0243	325.253	WT_rep2_peak_1793
chr12	33489770	33489921	152	33489878	38.27	7.80868	2.68511	4.91926	WT_rep2_peak_1794
chr12	34423876	34424033	158	34423968	62.63	21.6462	4.35032	18.5398	WT_rep2_peak_1795
chr12	35194104	35194627	524	35194233	154.25	103.731	10.6146	100.143	WT_rep2_peak_1796
chr12	40085725	40086726	1002	40086293	923.18	1298.63	63.1874	1293.71	WT_rep2_peak_1797
chr12	40365318	40365467	150	40365439	48.13	12.9807	3.35912	9.99094	WT_rep2_peak_1798
chr12	40600069	40600218	150	40600171	64.95	15.9025	3.29737	12.8666	WT_rep2_peak_1799
chr12	40820407	40820581	175	40820525	89.3	34.725	5.01681	31.494	WT_rep2_peak_1800
chr12	40894266	40894673	408	40894405	388.52	45.6229	2.26468	42.3117	WT_rep2_peak_1801
chr12	41501800	41504485	2686	41501925	369.39	377.414	25.3239	373.257	WT_rep2_peak_1802
chr12	44253715	44254324	610	44253860	385.62	400.513	26.434	396.323	WT_rep2_peak_1803
chr12	44329344	44329592	249	44329542	45.81	11.3301	3.20053	8.36762	WT_rep2_peak_1804
chr12	44329780	44330027	248	44329882	84.08	27.8993	4.25418	24.7312	WT_rep2_peak_1805
chr12	44358037	44358337	301	44358169	95.68	25.3157	3.58079	22.1708	WT_rep2_peak_1806
chr12	44645042	44645767	726	44645480	520.74	462.974	19.1464	458.709	WT_rep2_peak_1807
chr12	44646165	44646603	439	44646362	112.5	50.2455	5.97358	46.9059	WT_rep2_peak_1808
chr12	46745167	46745403	237	46745306	46.39	11.8714	3.24018	8.89882	WT_rep2_peak_1809
chr12	46746716	46747717	1002	46746944	294.58	200.542	11.3686	196.683	WT_rep2_peak_1810
chr12	49431123	49431313	191	49431269	133.37	31.5698	3.33434	28.3671	WT_rep2_peak_1811
chr12	49431608	49431892	285	49431630	113.66	15.6311	2.36164	12.6023	WT_rep2_peak_1812
chr12	49432045	49433222	1178	49432638	1058.29	1005.41	22.5862	1000.67	WT_rep2_peak_1813
chr12	50062792	50063127	336	50063023	49.87	13.5484	3.47807	10.5486	WT_rep2_peak_1814
chr12	51656466	51656799	334	51656702	85.82	25.6741	3.94651	22.5275	WT_rep2_peak_1815
chr12	51795309	51795797	489	51795666	183.24	91.9214	7.08632	88.3793	WT_rep2_peak_1816
chr12	51815374	51815558	185	51815466	91.62	41.7064	6.01442	38.4239	WT_rep2_peak_1817
chr12	51815719	51815870	152	51815780	103.22	42.5825	5.39999	39.2935	WT_rep2_peak_1818
chr12	51876933	51877203	271	51877129	54.51	16.5108	3.79525	13.4685	WT_rep2_peak_1819
chr12	52562860	52564367	1508	52563082	531.18	396.929	13.6456	392.743	WT_rep2_peak_1820
chr12	52564745	52565170	426	52565024	145.55	74.9858	7.25503	71.5146	WT_rep2_peak_1821
chr12	52566124	52566722	599	52566444	1113.38	617.122	8.57217	612.696	WT_rep2_peak_1822
chr12	52589153	52589312	160	52589269	70.75	23.2772	4.22036	20.1533	WT_rep2_peak_1823
chr12	52613863	52614295	433	52613995	338.65	333.525	23.2226	329.431	WT_rep2_peak_1824
chr12	52933134	52933881	748	52933652	416.94	192.634	6.63395	188.793	WT_rep2_peak_1825
chr12	52934188	52934802	615	52934679	449.41	344.032	14.1862	339.924	WT_rep2_peak_1826
chr12	53186878	53187124	247	53186892	105.54	26.5374	3.45346	23.3802	WT_rep2_peak_1827
chr12	53188040	53188996	957	53188628	354.89	133.582	5.23369	129.897	WT_rep2_peak_1828
chr12	53189172	53189450	279	53189217	98	16.9965	2.64355	13.9514	WT_rep2_peak_1829
chr12	53194689	53195045	357	53194794	138.59	48.2036	4.6531	44.8755	WT_rep2_peak_1830
chr12	54115492	54115843	352	54115629	80.6	34.7183	5.57939	31.4876	WT_rep2_peak_1831
chr12	55723636	55723969	334	55723927	343.29	145.83	5.95148	142.109	WT_rep2_peak_1832
chr12	55915277	55915564	288	55915401	176.29	88.6073	7.09142	85.0779	WT_rep2_peak_1833
chr12	57285168	57286039	872	57285779	251.67	194.59	14.0373	190.746	WT_rep2_peak_1834
chr12	58260457	58260783	327	58260566	232.53	193.57	15.9671	189.727	WT_rep2_peak_1835
chr12	59118172	59118689	518	59118317	475.51	142.652	4.21688	138.94	WT_rep2_peak_1836
chr12	59119235	59119573	339	59119491	310.24	88.4476	3.99025	84.9186	WT_rep2_peak_1837
chr12	59248107	59248256	150	59248120	92.2	33.293	4.6601	30.0736	WT_rep2_peak_1838
chr12	59251254	59251748	495	59251374	48.13	12.9807	3.35912	9.99094	WT_rep2_peak_1839
chr12	61570095	61570433	339	61570321	193.68	113.684	8.84919	110.063	WT_rep2_peak_1840
chr12	61570772	61571595	824	61571163	310.82	263.549	16.9467	259.566	WT_rep2_peak_1841
chr12	61651689	61651865	177	61651759	103.22	53.8959	7.12565	50.5313	WT_rep2_peak_1842
chr12	61755345	61755594	250	61755471	55.09	17.127	3.8349	14.0756	WT_rep2_peak_1843
chr12	61886282	61887474	1193	61886392	285.3	261.407	19.575	257.427	WT_rep2_peak_1844
chr12	61890232	61890797	566	61890303	178.03	129.879	12.2402	126.206	WT_rep2_peak_1845
chr12	64990001	64990340	340	64990136	112.5	62.0273	7.76001	58.6183	WT_rep2_peak_1846
chr12	65004054	65004338	285	65004197	79.44	33.9432	5.5001	30.7193	WT_rep2_peak_1847
chr12	65013651	65014746	1096	65014417	524.22	612.201	35.9098	607.78	WT_rep2_peak_1848
chr12	65023370	65023519	150	65023480	61.47	20.9794	4.27102	17.8811	WT_rep2_peak_1849
chr12	66517073	66517534	462	66517220	98	49.5217	6.76882	46.1845	WT_rep2_peak_1850
chr12	66517832	66518357	526	66517981	474.93	533.957	32.5398	529.616	WT_rep2_peak_1851
chr12	66676862	66677011	150	66676961	40.01	8.76489	2.80406	5.85521	WT_rep2_peak_1852
chr12	66715351	66715628	278	66715495	74.81	30.1491	5.18292	26.9565	WT_rep2_peak_1853
chr12	67127223	67127390	168	67127256	74.81	30.1491	5.18292	26.9565	WT_rep2_peak_1854
chr12	67267829	67268951	1123	67267977	190.78	143.488	13.1124	139.774	WT_rep2_peak_1855
chr12	69229640	69229805	166	69229764	213.4	106.912	7.14661	103.315	WT_rep2_peak_1856
chr12	69232050	69232741	692	69232197	133.95	82.1656	9.22697	78.6613	WT_rep2_peak_1857
chr12	69236866	69237019	154	69236978	61.47	20.9794	4.27102	17.8811	WT_rep2_peak_1858
chr12	69245130	69245279	150	69245270	35.95	6.4551	2.52652	3.59953	WT_rep2_peak_1859
chr12	69363564	69363716	153	69363642	91.04	43.5819	6.29305	40.2843	WT_rep2_peak_1860
chr12	69419556	69420373	818	69419954	588.59	403.3	11.7917	399.106	WT_rep2_peak_1861
chr12	69631947	69632306	360	69632132	98	49.5217	6.76882	46.1845	WT_rep2_peak_1862
chr12	69664019	69664171	153	69664042	62.05	21.6462	4.31067	18.5398	WT_rep2_peak_1863
chr12	69790562	69790711	150	69790583	60.89	20.3195	4.23137	17.2272	WT_rep2_peak_1864
chr12	69793859	69794224	366	69794006	53.35	15.9023	3.71595	12.8665	WT_rep2_peak_1865
chr12	70005798	70006182	385	70006098	59.15	19.6665	4.11243	16.5826	WT_rep2_peak_1866
chr12	70022921	70023119	199	70023024	61.47	20.9794	4.27102	17.8811	WT_rep2_peak_1867
chr12	70031016	70031249	234	70031112	314.88	300.386	21.597	296.341	WT_rep2_peak_1868
chr12	70060088	70060991	904	70060878	528.28	618.552	36.1874	614.125	WT_rep2_peak_1869
chr12	70090434	70090983	550	70090861	189.62	127.109	10.8002	123.444	WT_rep2_peak_1870
chr12	70091946	70092239	294	70092063	226.16	70.7486	4.28596	67.296	WT_rep2_peak_1871
chr12	70314104	70314570	467	70314568	57.41	13.3732	3.09861	10.3803	WT_rep2_peak_1872
chr12	70946458	70946607	150	70946501	55.09	17.127	3.8349	14.0756	WT_rep2_peak_1873
chr12	71113799	71114077	279	71113962	189.62	82.0135	5.95697	78.5114	WT_rep2_peak_1874
chr12	71116536	71116685	150	71116611	107.28	53.5545	6.76744	50.1939	WT_rep2_peak_1875
chr12	71121687	71122748	1062	71121944	154.25	93.9434	9.13235	90.3925	WT_rep2_peak_1876
chr12	71170168	71170338	171	71170205	58.57	17.1429	3.72304	14.0913	WT_rep2_peak_1877
chr12	71364229	71364532	304	71364439	114.82	63.8772	7.9186	60.458	WT_rep2_peak_1878
chr12	72036339	72036889	551	72036483	212.82	45.9444	3.19132	42.6321	WT_rep2_peak_1879
chr12	72116104	72116565	462	72116213	309.66	293.58	21.2402	289.546	WT_rep2_peak_1880
chr12	72258826	72259185	360	72258962	727.18	255.232	4.92012	251.263	WT_rep2_peak_1881
chr12	72321301	72321566	266	72321427	81.76	35.4988	5.65869	32.261	WT_rep2_peak_1882
chr12	72355050	72355547	498	72355206	1221.82	1150.08	22.2331	1145.25	WT_rep2_peak_1883
chr12	72588196	72588526	331	72588393	239.49	202.253	16.4428	198.39	WT_rep2_peak_1884
chr12	72620418	72621032	615	72620955	149.03	98.4782	10.2578	94.9093	WT_rep2_peak_1885
chr12	72830568	72831203	636	72830802	781.69	449.236	8.99641	444.986	WT_rep2_peak_1886
chr12	73331588	73331774	187	73331682	70.75	27.2164	4.90538	24.0517	WT_rep2_peak_1887
chr12	73988787	73988994	208	73988930	158.89	73.3683	6.39556	69.9035	WT_rep2_peak_1888
chr12	74313425	74313798	374	74313652	346.19	228.384	10.8498	224.466	WT_rep2_peak_1889
chr12	74342289	74342449	161	74342319	131.63	80.1827	9.06838	76.6873	WT_rep2_peak_1890
chr12	74944391	74944948	558	74944805	328.8	319.624	22.5486	315.551	WT_rep2_peak_1891
chr12	75500165	75500710	546	75500314	221.52	164.54	12.937	160.768	WT_rep2_peak_1892
chr12	75540241	75540393	153	75540346	112.5	62.0273	7.76001	58.6183	WT_rep2_peak_1893
chr12	75562399	75562548	150	75562457	60.31	20.3195	4.19172	17.2272	WT_rep2_peak_1894
chr12	75762888	75763276	389	75763157	71.91	27.9407	4.98468	24.7685	WT_rep2_peak_1895
chr12	76374337	76375879	1543	76374607	772.99	647.391	17.1998	642.936	WT_rep2_peak_1896
chr12	76376111	76377264	1154	76376643	299.22	217.768	12.6944	213.872	WT_rep2_peak_1897
chr12	76377652	76377801	150	76377748	47.55	12.4216	3.31948	9.44188	WT_rep2_peak_1898
chr12	76395872	76396033	162	76395899	107.86	57.4701	7.44283	54.0849	WT_rep2_peak_1899
chr12	76396215	76396641	427	76396220	48.71	12.9807	3.39877	9.99094	WT_rep2_peak_1900
chr12	76432629	76433860	1232	76433384	400.7	422.43	27.4649	418.212	WT_rep2_peak_1901
chr12	76452731	76453309	579	76452952	634.4	105.781	2.75063	102.186	WT_rep2_peak_1902
chr12	76623078	76623300	223	76623254	45.23	11.3301	3.16089	8.36762	WT_rep2_peak_1903
chr12	76624972	76625388	417	76625070	99.74	50.388	6.88776	47.045	WT_rep2_peak_1904
chr12	76629619	76629908	290	76629764	104.96	39.8366	5.02178	36.5663	WT_rep2_peak_1905
chr12	76659570	76660175	606	76659645	369.39	146.576	5.52818	142.853	WT_rep2_peak_1906
chr12	76984674	76985425	752	76984914	286.46	262.731	19.6543	258.748	WT_rep2_peak_1907
chr12	77378750	77379097	348	77378963	168.17	118.803	11.5662	115.165	WT_rep2_peak_1908
chr12	77411615	77411995	381	77411739	138.59	87.179	9.54415	83.6549	WT_rep2_peak_1909
chr12	77521883	77522619	737	77522295	397.22	418.027	27.227	413.814	WT_rep2_peak_1910
chr12	78273085	78273243	159	78273194	69.01	26.4981	4.78644	23.3411	WT_rep2_peak_1911
chr12	78731275	78731425	151	78731291	68.43	25.7859	4.74679	22.6367	WT_rep2_peak_1912
chr12	78843715	78844108	394	78843969	450.57	337.936	13.684	333.836	WT_rep2_peak_1913
chr12	78884100	78884596	497	78884450	251.09	217.343	17.2358	213.448	WT_rep2_peak_1914
chr12	79010949	79011600	652	79011253	372.29	381.723	25.5221	377.559	WT_rep2_peak_1915
chr12	79222740	79223052	313	79222913	59.15	15.3354	3.34158	12.3089	WT_rep2_peak_1916
chr12	80383724	80383957	234	80383831	162.95	30.4871	2.87628	27.2929	WT_rep2_peak_1917
chr12	80385186	80386869	1684	80385482	808.36	832.538	26.9787	827.929	WT_rep2_peak_1918
chr12	80726365	80726920	556	80726618	334.01	327.949	22.9054	323.863	WT_rep2_peak_1919
chr12	80801143	80801613	471	80801474	69.01	26.4981	4.78644	23.3411	WT_rep2_peak_1920
chr12	80803691	80804231	541	80804083	262.11	231.394	17.9891	227.47	WT_rep2_peak_1921
chr12	80996563	80996899	337	80996710	387.94	215.697	8.45531	211.806	WT_rep2_peak_1922
chr12	81245914	81246192	279	81246045	195.42	149.256	13.4296	145.525	WT_rep2_peak_1923
chr12	81251747	81251919	173	81251805	78.28	33.1733	5.4208	29.9546	WT_rep2_peak_1924
chr12	81260862	81261071	210	81260940	86.4	39.4785	5.97587	36.2095	WT_rep2_peak_1925
chr12	81361079	81361983	905	81361500	149.61	98.4782	10.2975	94.9093	WT_rep2_peak_1926
chr12	81401822	81401971	150	81401936	67.85	25.0799	4.70714	21.9363	WT_rep2_peak_1927
chr12	81404061	81404328	268	81404200	56.83	17.7508	3.95384	14.6903	WT_rep2_peak_1928
chr12	81514477	81514626	150	81514486	54.51	7.37609	2.22037	4.49868	WT_rep2_peak_1929
chr12	81710471	81710965	495	81710597	82.92	36.2845	5.73798	33.0401	WT_rep2_peak_1930
chr12	81713000	81713206	207	81713125	87.56	40.2895	6.05516	37.0157	WT_rep2_peak_1931
chr12	81768701	81769327	627	81769090	183.24	135.509	12.597	131.818	WT_rep2_peak_1932
chr12	81770989	81771239	251	81771097	91.04	42.6604	6.13615	39.3711	WT_rep2_peak_1933
chr12	81790721	81790880	160	81790764	72.49	28.671	5.02432	25.4931	WT_rep2_peak_1934
chr12	81819527	81819681	155	81819597	56.25	17.7508	3.91419	14.6903	WT_rep2_peak_1935
chr12	81965521	81966104	584	81965957	448.83	304.728	11.5342	300.676	WT_rep2_peak_1936
chr12	82042712	82043784	1073	82042896	280.09	165.582	9.06727	161.808	WT_rep2_peak_1937
chr12	82388540	82389219	680	82388922	815.32	436.968	8.13879	432.733	WT_rep2_peak_1938
chr12	82471886	82472100	215	82471996	267.91	65.8765	3.53826	62.4479	WT_rep2_peak_1939
chr12	82479449	82479692	244	82479576	128.15	23.792	2.80772	20.6631	WT_rep2_peak_1940
chr12	83621508	83621858	351	83621727	68.43	25.7859	4.74679	22.6367	WT_rep2_peak_1941
chr12	83641245	83641434	190	83641324	193.68	110.196	8.46444	106.586	WT_rep2_peak_1942
chr12	83641641	83642052	412	83641878	262.11	221.015	16.4443	217.113	WT_rep2_peak_1943
chr12	83710646	83710992	347	83710832	364.75	54.9594	2.5757	51.589	WT_rep2_peak_1944
chr12	83714719	83715245	527	83714866	1131.36	523.602	6.74023	519.271	WT_rep2_peak_1945
chr12	83719399	83719566	168	83719513	427.96	94.6312	3.29966	91.0778	WT_rep2_peak_1946
chr12	83721006	83721164	159	83721100	266.17	96.0747	4.94756	92.516	WT_rep2_peak_1947
chr12	83780739	83781638	900	83781061	414.62	443.106	28.4164	438.863	WT_rep2_peak_1948
chr12	84218521	84218675	155	84218558	441.87	316.858	12.6535	312.789	WT_rep2_peak_1949
chr12	84219589	84220490	902	84219736	523.06	610.615	35.8305	606.195	WT_rep2_peak_1950
chr12	84464424	84464868	445	84464780	120.04	69.5159	8.27543	66.069	WT_rep2_peak_1951
chr12	84577050	84577293	244	84577162	88.14	41.1054	6.09481	37.8253	WT_rep2_peak_1952
chr12	84965663	84965813	151	84965687	183.24	57.7989	4.28475	54.4126	WT_rep2_peak_1953
chr12	84965973	84967009	1037	84966315	726.02	695.658	22.7193	691.159	WT_rep2_peak_1954
chr12	85061421	85062277	857	85062058	300.38	129.419	6.02763	125.748	WT_rep2_peak_1955
chr12	85075549	85075830	282	85075747	135.11	59.4725	5.91798	56.0772	WT_rep2_peak_1956
chr12	85076113	85076446	334	85076327	543.93	221.036	5.73615	217.134	WT_rep2_peak_1957
chr12	85076623	85077611	989	85077048	589.16	243.702	5.84322	239.755	WT_rep2_peak_1958
chr12	85087264	85087414	151	85087398	155.41	22.3152	2.4439	19.2055	WT_rep2_peak_1959
chr12	85120822	85121258	437	85120960	153.67	102.675	10.575	99.0906	WT_rep2_peak_1960
chr12	85182523	85183177	655	85183081	110.18	60.1927	7.60142	56.7929	WT_rep2_peak_1961
chr12	85313129	85313417	289	85313272	89.3	41.9261	6.17411	38.6396	WT_rep2_peak_1962
chr12	85314066	85314571	506	85314533	74.81	30.1491	5.18292	26.9565	WT_rep2_peak_1963
chr12	85348381	85348680	300	85348524	103.8	53.8959	7.1653	50.5313	WT_rep2_peak_1964
chr12	85389816	85390280	465	85390064	588.59	476.528	15.9347	472.247	WT_rep2_peak_1965
chr12	85645048	85645231	184	85645183	62.05	21.6462	4.31067	18.5398	WT_rep2_peak_1966
chr12	85685565	85686325	761	85685706	547.99	359.639	10.9799	355.509	WT_rep2_peak_1967
chr12	86928262	86929576	1315	86928658	714.42	527.743	13.4985	523.409	WT_rep2_peak_1968
chr12	87008516	87009303	788	87008659	281.82	252.974	18.855	249.009	WT_rep2_peak_1969
chr12	87136284	87136454	171	87136325	136.85	85.1642	9.42521	81.6477	WT_rep2_peak_1970
chr12	87155791	87155940	150	87155852	51.61	14.709	3.59701	11.6927	WT_rep2_peak_1971
chr12	87220863	87221143	281	87220982	205.28	160.956	14.1036	157.194	WT_rep2_peak_1972
chr12	87285878	87286480	603	87286167	372.87	322.318	17.8032	318.241	WT_rep2_peak_1973
chr12	87475381	87475868	488	87475787	128.15	77.2328	8.8305	73.7501	WT_rep2_peak_1974
chr12	87497004	87497477	474	87497146	222.68	127.463	8.60294	123.798	WT_rep2_peak_1975
chr12	88762261	88762458	198	88762369	45.23	10.267	2.94466	7.32994	WT_rep2_peak_1976
chr12	89006494	89006643	150	89006580	70.17	19.2574	3.55831	16.1805	WT_rep2_peak_1977
chr12	89564194	89564344	151	89564307	60.89	20.3195	4.23137	17.2272	WT_rep2_peak_1978
chr12	89564887	89565085	199	89564940	111.92	61.1081	7.72036	57.7031	WT_rep2_peak_1979
chr12	89567975	89568180	206	89568050	51.61	14.709	3.59701	11.6927	WT_rep2_peak_1980
chr12	89607349	89607536	188	89607458	122.36	34.9855	3.85488	31.7536	WT_rep2_peak_1981
chr12	89766364	89766516	153	89766436	88.72	41.1054	6.13446	37.8253	WT_rep2_peak_1982
chr12	89767073	89767437	365	89767312	107.28	57.4701	7.40318	54.0849	WT_rep2_peak_1983
chr12	90039100	90039416	317	90039224	70.75	26.5411	4.78308	23.3837	WT_rep2_peak_1984
chr12	90171267	90171480	214	90171443	59.73	13.2859	3.03642	10.2934	WT_rep2_peak_1985
chr12	90288850	90288999	150	90288880	44.07	7.89324	2.50397	5.00291	WT_rep2_peak_1986
chr12	90298354	90299471	1118	90299103	1431.74	1453.22	26.5322	1448.21	WT_rep2_peak_1987
chr12	90299616	90300231	616	90299732	219.2	177.688	15.0552	173.882	WT_rep2_peak_1988
chr12	90695433	90696481	1049	90696317	269.65	170.029	10.024	166.243	WT_rep2_peak_1989
chr12	90705544	90705812	269	90705671	234.27	77.4909	4.5245	74.0077	WT_rep2_peak_1990
chr12	91526349	91526731	383	91526497	200.06	155.079	13.7468	151.333	WT_rep2_peak_1991
chr12	91529695	91529898	204	91529828	80.6	34.7183	5.57939	31.4876	WT_rep2_peak_1992
chr12	91773046	91773597	552	91773482	352.57	143.92	5.70276	140.204	WT_rep2_peak_1993
chr12	91775025	91776771	1747	91775714	1022.92	1025.99	25.598	1021.23	WT_rep2_peak_1994
chr12	95745314	95745831	518	95745409	67.27	25.0799	4.6675	21.9363	WT_rep2_peak_1995
chr12	95746017	95746166	150	95746078	36.53	6.89518	2.56617	4.0308	WT_rep2_peak_1996
chr12	95746421	95747935	1515	95747394	760.81	670.19	19.0453	665.714	WT_rep2_peak_1997
chr12	98401109	98401477	369	98401333	130.47	79.1961	8.98909	75.7052	WT_rep2_peak_1998
[truncated: 7,616 more rows]

## Sheet: Replicate3
Replicate3 of m6A-RIP
chr	start	end	length	abs_summit	pileup	-LOG10(pvalue)	fold_enrichment	-LOG10(qvalue)	name
JH584304.1	46454	46608	155	46533	71.91	27.9407	4.98468	24.7685	WT_rep3_peak_1
JH584304.1	59782	60231	450	60152	126.42	74.1264	8.52276	70.6594	WT_rep3_peak_2
MU069434.1	1682	1924	243	1805	55.09	17.127	3.8349	14.0756	WT_rep3_peak_3
chr1	3275169	3275328	160	3275218	86.4	39.4785	5.97587	36.2095	WT_rep3_peak_4
chr1	3275525	3275800	276	3275672	138.59	87.179	9.54415	83.6549	WT_rep3_peak_5
chr1	3277189	3277670	482	3277374	269.07	240.439	18.4649	236.498	WT_rep3_peak_6
chr1	3283703	3284348	646	3284136	155.41	94.9327	9.20057	91.3785	WT_rep3_peak_7
chr1	3284798	3287077	2280	3284997	196	150.416	13.4693	146.682	WT_rep3_peak_8
chr1	3644777	3645112	336	3644994	84.66	12.1797	2.37954	9.20466	WT_rep3_peak_9
chr1	3689603	3689948	346	3689850	45.81	11.3301	3.20053	8.36762	WT_rep3_peak_10
chr1	3690367	3690516	150	3690434	59.73	19.6665	4.15208	16.5826	WT_rep3_peak_11
chr1	3690857	3691298	442	3690971	69.01	26.4981	4.78644	23.3411	WT_rep3_peak_12
chr1	3691539	3691816	278	3691708	102.06	53.0126	7.04635	49.6538	WT_rep3_peak_13
chr1	3741210	3741360	151	3741327	122.36	27.1649	3.16704	24.0044	WT_rep3_peak_14
chr1	6310278	6310569	292	6310420	174.55	125.419	12.0023	121.759	WT_rep3_peak_15
chr1	6314284	6314436	153	6314330	70.17	27.2164	4.86573	24.0517	WT_rep3_peak_16
chr1	6318862	6320319	1458	6320136	410.56	396.653	22.5512	392.467	WT_rep3_peak_17
chr1	6872764	6873195	432	6872907	103.22	53.8959	7.12565	50.5313	WT_rep3_peak_18
chr1	6928798	6928947	150	6928862	49.29	13.1186	3.35269	10.1279	WT_rep3_peak_19
chr1	7190324	7190797	474	7190586	318.36	113.347	4.9132	109.727	WT_rep3_peak_20
chr1	7239708	7240109	402	7239846	662.23	709.16	29.3465	704.651	WT_rep3_peak_21
chr1	8820630	8820844	215	8820696	70.17	27.2164	4.86573	24.0517	WT_rep3_peak_22
chr1	9368412	9368732	321	9368542	121.2	50.7228	5.55438	47.3787	WT_rep3_peak_23
chr1	9616462	9617158	697	9616685	322.42	147.125	6.46834	143.4	WT_rep3_peak_24
chr1	9671473	9671795	323	9671591	84.08	23.7706	3.69929	20.6419	WT_rep3_peak_25
chr1	9794690	9795360	671	9794893	1374.33	1969.94	68.7666	1964.69	WT_rep3_peak_26
chr1	9815924	9816456	533	9816311	858.23	1063.73	43.5054	1058.96	WT_rep3_peak_27
chr1	9816603	9818210	1608	9817937	342.71	307.627	19.0952	303.572	WT_rep3_peak_28
chr1	10136653	10136974	322	10136892	84.66	37.8714	5.85693	34.6154	WT_rep3_peak_29
chr1	10208673	10208852	180	10208780	66.11	10.8434	2.48545	7.89125	WT_rep3_peak_30
chr1	11671275	11671562	288	11671401	249.35	166.419	10.8848	162.642	WT_rep3_peak_31
chr1	12929351	12929526	176	12929400	50.45	14.1246	3.51771	11.1181	WT_rep3_peak_32
chr1	13212596	13212913	318	13212693	72.49	24.5929	4.3227	21.4558	WT_rep3_peak_33
chr1	13244350	13245488	1139	13244537	339.81	261.679	14.2006	257.698	WT_rep3_peak_34
chr1	14240606	14240978	373	14240864	81.76	35.4988	5.65869	32.261	WT_rep3_peak_35
chr1	15382897	15383134	238	15383046	113.08	58.7848	7.12987	55.3941	WT_rep3_peak_36
chr1	15469703	15469970	268	15469852	127.58	68.3501	7.56324	64.91	WT_rep3_peak_37
chr1	15484775	15484983	209	15484917	70.75	19.2574	3.58731	16.1805	WT_rep3_peak_38
chr1	15780282	15780970	689	15780513	146.71	95.3609	10.0992	91.8039	WT_rep3_peak_39
chr1	15781130	15782099	970	15781464	477.83	533.131	31.9218	528.791	WT_rep3_peak_40
chr1	16176053	16176216	164	16176180	51.03	14.709	3.55736	11.6927	WT_rep3_peak_41
chr1	16299803	16300022	220	16299891	119.46	58.4889	6.69204	55.099	WT_rep3_peak_42
chr1	16412970	16413322	353	16413257	59.15	19.6665	4.11243	16.5826	WT_rep3_peak_43
chr1	16414787	16415224	438	16415086	216.3	64.4298	4.09996	61.0088	WT_rep3_peak_44
chr1	16747398	16747764	367	16747459	153.09	102.675	10.5353	99.0906	WT_rep3_peak_45
chr1	17066969	17067488	520	17067199	112.5	62.0273	7.76001	58.6183	WT_rep3_peak_46
chr1	17074202	17074895	694	17074275	93.36	45.2563	6.45164	41.9463	WT_rep3_peak_47
chr1	17086269	17086451	183	17086385	95.1	46.949	6.57058	43.6283	WT_rep3_peak_48
chr1	17161600	17161914	315	17161697	975.95	708.792	13.202	704.284	WT_rep3_peak_49
chr1	18065100	18065355	256	18065147	44.65	10.7979	3.12124	7.84597	WT_rep3_peak_50
chr1	21005541	21008619	3079	21005994	1014.22	1076.1	29.215	1071.32	WT_rep3_peak_51
chr1	21469539	21470060	522	21469843	99.74	38.256	5.03703	34.9982	WT_rep3_peak_52
chr1	21472126	21473215	1090	21472443	1362.73	1901.9	63.2823	1896.67	WT_rep3_peak_53
chr1	21948308	21948549	242	21948450	53.35	13.1415	3.19703	10.1502	WT_rep3_peak_54
chr1	22358466	22358719	254	22358483	135.11	31.9056	3.31984	28.6996	WT_rep3_peak_55
chr1	23408516	23409509	994	23409075	1772.71	1805.9	26.8744	1800.72	WT_rep3_peak_56
chr1	24067534	24068275	742	24067657	171.65	89.9281	7.50637	86.3939	WT_rep3_peak_57
chr1	24068744	24068911	168	24068847	49.29	13.5484	3.43842	10.5486	WT_rep3_peak_58
chr1	24111362	24111511	150	24111441	38.27	7.80868	2.68511	4.91926	WT_rep3_peak_59
chr1	24302159	24302955	797	24302332	102.06	53.0126	7.04635	49.6538	WT_rep3_peak_60
chr1	24802524	24802673	150	24802605	55.67	12.2106	2.98259	9.23526	WT_rep3_peak_61
chr1	25107039	25107525	487	25107324	206.44	162.138	14.1829	158.373	WT_rep3_peak_62
chr1	25113786	25114015	230	25113878	125.26	60.9618	6.64503	57.5596	WT_rep3_peak_63
chr1	25132856	25133483	628	25133263	2561.36	4008.35	94.9022	4002.46	WT_rep3_peak_64
chr1	25157721	25157956	236	25157851	138.01	87.179	9.50451	83.6549	WT_rep3_peak_65
chr1	25591509	25591658	150	25591614	50.45	14.1246	3.51771	11.1181	WT_rep3_peak_66
chr1	25598941	25599090	150	25598962	80.02	13.2217	2.53201	10.2298	WT_rep3_peak_67
chr1	25847826	25848183	358	25847940	266.17	184.625	11.616	180.803	WT_rep3_peak_68
chr1	25865100	25865925	826	25865555	323	311.347	22.1521	307.286	WT_rep3_peak_69
chr1	30842950	30844674	1725	30843079	2809.55	3174.59	35.1319	3168.9	WT_rep3_peak_70
chr1	30852649	30852803	155	30852765	53.93	15.9023	3.7556	12.8665	WT_rep3_peak_71
chr1	30868975	30870418	1444	30869510	186.14	138.915	12.7953	135.213	WT_rep3_peak_72
chr1	33778595	33779566	972	33778740	132.21	81.1725	9.10803	77.6727	WT_rep3_peak_73
chr1	33815625	33816132	508	33815904	138.01	87.179	9.50451	83.6549	WT_rep3_peak_74
chr1	33816283	33816562	280	33816375	69.01	26.4981	4.78644	23.3411	WT_rep3_peak_75
chr1	33839894	33842407	2514	33841483	1101.78	1261.04	35.5737	1256.14	WT_rep3_peak_76
chr1	34230923	34231153	231	34231013	109.6	39.9932	4.80863	36.7222	WT_rep3_peak_77
chr1	34266792	34267399	608	34267037	547.99	357.44	10.8712	353.313	WT_rep3_peak_78
chr1	34346711	34347107	397	34346840	95.1	19.9399	2.98452	16.8543	WT_rep3_peak_79
chr1	34466086	34466271	186	34466136	82.92	36.2845	5.73798	33.0401	WT_rep3_peak_80
chr1	34467197	34467349	153	34467259	74.23	30.1491	5.14327	26.9565	WT_rep3_peak_81
chr1	34468005	34468154	150	34468028	51.61	14.709	3.59701	11.6927	WT_rep3_peak_82
chr1	34471794	34471943	150	34471806	37.11	7.34647	2.60582	4.46935	WT_rep3_peak_83
chr1	34626333	34627413	1081	34627264	111.34	61.1081	7.68072	57.7031	WT_rep3_peak_84
chr1	34628029	34628723	695	34628523	303.28	285.458	20.8041	281.438	WT_rep3_peak_85
chr1	34628904	34629621	718	34628997	86.4	15.0784	2.64858	12.0592	WT_rep3_peak_86
chr1	34762760	34762947	188	34762814	58.57	19.0207	4.07278	15.9453	WT_rep3_peak_87
chr1	34763234	34763540	307	34763347	95.68	46.949	6.61023	43.6283	WT_rep3_peak_88
chr1	34850764	34851347	584	34851059	233.69	126.714	7.9964	123.051	WT_rep3_peak_89
chr1	34851493	34851771	279	34851519	63.79	9.61771	2.39954	6.69303	WT_rep3_peak_90
chr1	36142717	36143628	912	36143221	622.22	754.042	40.0784	749.496	WT_rep3_peak_91
chr1	36145081	36145430	350	36145297	298.64	278.73	20.4869	274.721	WT_rep3_peak_92
chr1	36182925	36183392	468	36183253	274.87	246.949	18.8614	242.995	WT_rep3_peak_93
chr1	36374881	36375376	496	36375089	761.97	606.669	15.5708	602.254	WT_rep3_peak_94
chr1	36463092	36463370	279	36463241	113.08	28.5747	3.45691	25.3993	WT_rep3_peak_95
chr1	36511728	36512049	322	36511864	45.23	11.3301	3.16089	8.36762	WT_rep3_peak_96
chr1	36551933	36552174	242	36552081	102.06	53.0126	7.04635	49.6538	WT_rep3_peak_97
chr1	36588340	36588569	230	36588449	184.98	136.642	12.716	132.947	WT_rep3_peak_98
chr1	36831605	36831929	325	36831727	144.97	93.2974	9.98028	89.7482	WT_rep3_peak_99
chr1	37447304	37447456	153	37447314	59.73	12.4174	2.89873	9.44071	WT_rep3_peak_100
chr1	37459369	37459607	239	37459489	99.74	50.388	6.88776	47.045	WT_rep3_peak_101
chr1	37483522	37483674	153	37483554	57.41	18.3821	3.99349	15.3128	WT_rep3_peak_102
chr1	37651200	37651352	153	37651305	264.43	77.6525	4.08037	74.1687	WT_rep3_peak_103
chr1	37662958	37663531	574	37663179	561.33	271.095	7.03793	267.099	WT_rep3_peak_104
chr1	38057824	38058595	772	38058366	398.96	209.972	7.84239	206.092	WT_rep3_peak_105
chr1	38060540	38060833	294	38060687	632.66	237.95	5.28047	234.013	WT_rep3_peak_106
chr1	38061126	38061290	165	38061242	187.88	47.2659	3.56384	43.9441	WT_rep3_peak_107
chr1	38071251	38071403	153	38071363	96.26	25.8891	3.60227	22.7391	WT_rep3_peak_108
chr1	38074961	38075129	169	38075082	327.64	50.7084	2.60822	47.3645	WT_rep3_peak_109
chr1	38090698	38090847	150	38090844	37.11	5.68615	2.24193	2.85664	WT_rep3_peak_110
chr1	38127090	38127774	685	38127618	247.03	212.285	16.9583	208.4	WT_rep3_peak_111
chr1	38247096	38247260	165	38247124	211.66	99.9014	6.64558	96.3277	WT_rep3_peak_112
chr1	38248655	38249263	609	38248782	140.91	83.9154	8.86953	80.4056	WT_rep3_peak_113
chr1	38836452	38837283	832	38836776	946.38	1115.08	38.1237	1110.27	WT_rep3_peak_114
chr1	38903012	38903407	396	38903124	91.62	43.5819	6.3327	40.2843	WT_rep3_peak_115
chr1	38903745	38904954	1210	38904675	178.03	123.004	11.1891	119.353	WT_rep3_peak_116
chr1	39591416	39591615	200	39591542	77.7	32.409	5.38115	29.1972	WT_rep3_peak_117
chr1	39657742	39658225	484	39657816	1366.21	754.571	8.54508	750.025	WT_rep3_peak_118
chr1	39658903	39659129	227	39659030	64.95	23.0001	4.50891	19.8778	WT_rep3_peak_119
chr1	39660990	39661139	150	39661022	79.44	13.2968	2.57011	10.3043	WT_rep3_peak_120
chr1	39661873	39662297	425	39662156	136.85	48.5014	4.75356	45.1722	WT_rep3_peak_121
chr1	40064271	40064420	150	40064329	111.92	57.4503	7.12417	54.0676	WT_rep3_peak_122
chr1	40115094	40115369	276	40115224	41.75	9.25841	2.923	6.33707	WT_rep3_peak_123
chr1	40352289	40353051	763	40352778	134.53	83.1619	9.26662	79.654	WT_rep3_peak_124
chr1	40668489	40668719	231	40668619	99.16	50.388	6.84812	47.045	WT_rep3_peak_125
chr1	40668955	40669307	353	40669104	111.34	61.1081	7.68072	57.7031	WT_rep3_peak_126
chr1	40806997	40807474	478	40807269	84.08	37.8714	5.81728	34.6154	WT_rep3_peak_127
chr1	42630080	42630237	158	42630169	62.63	21.6462	4.35032	18.5398	WT_rep3_peak_128
chr1	42735139	42736068	930	42735521	964.35	1013.66	28.5185	1008.92	WT_rep3_peak_129
chr1	42737188	42737475	288	42737354	142.07	44.2245	4.1712	40.9246	WT_rep3_peak_130
chr1	42737913	42739317	1405	42738049	3436.41	4577.89	56.351	4571.9	WT_rep3_peak_131
chr1	42740792	42740942	151	42740900	77.12	32.409	5.34151	29.1972	WT_rep3_peak_132
chr1	43088762	43088911	150	43088768	41.75	9.25841	2.923	6.33707	WT_rep3_peak_133
chr1	43114621	43115081	461	43114947	78.86	24.0645	3.99323	20.9343	WT_rep3_peak_134
chr1	43593276	43593663	388	43593396	103.8	20.4549	2.9111	17.3618	WT_rep3_peak_135
chr1	43608625	43609151	527	43609037	132.21	81.1725	9.10803	77.6727	WT_rep3_peak_136
chr1	44182093	44182384	292	44182236	62.05	21.6462	4.31067	18.5398	WT_rep3_peak_137
chr1	44220024	44220211	188	44220122	210.5	166.886	14.4605	163.108	WT_rep3_peak_138
chr1	46874321	46875317	997	46875097	681.95	696.858	26.3686	692.359	WT_rep3_peak_139
chr1	50992666	50992899	234	50992811	95.1	13.3416	2.34394	10.349	WT_rep3_peak_140
chr1	51023626	51023790	165	51023657	66.11	24.3802	4.5882	21.2442	WT_rep3_peak_141
chr1	51224549	51224708	160	51224564	96.26	31.2126	4.22875	28.0114	WT_rep3_peak_142
chr1	51340277	51340426	150	51340375	52.19	15.3017	3.63666	12.2754	WT_rep3_peak_143
chr1	52198559	52198936	378	52198791	93.36	45.2563	6.45164	41.9463	WT_rep3_peak_144
chr1	52226826	52226997	172	52226933	85.82	38.6725	5.93622	35.4099	WT_rep3_peak_145
chr1	52529175	52529410	236	52529294	708.04	802.01	33.8445	797.426	WT_rep3_peak_146
chr1	52695827	52696161	335	52695901	82.34	26.6002	4.1672	23.4425	WT_rep3_peak_147
chr1	52696963	52697495	533	52697107	139.17	76.8269	7.87488	73.3473	WT_rep3_peak_148
chr1	52748017	52748974	958	52748249	201.22	129.406	10.111	125.735	WT_rep3_peak_149
chr1	52827882	52828209	328	52828092	99.16	50.388	6.84812	47.045	WT_rep3_peak_150
chr1	52828766	52829251	486	52829061	153.09	102.675	10.5353	99.0906	WT_rep3_peak_151
chr1	53851989	53852327	339	53852132	107.28	57.4701	7.40318	54.0849	WT_rep3_peak_152
chr1	53965360	53965564	205	53965461	84.66	37.8714	5.85693	34.6154	WT_rep3_peak_153
chr1	55117354	55117596	243	55117496	84.08	37.0321	5.67224	33.7845	WT_rep3_peak_154
chr1	55211020	55211173	154	55211125	132.79	81.1725	9.14768	77.6727	WT_rep3_peak_155
chr1	55277453	55278351	899	55277912	178.61	129.879	12.2798	126.206	WT_rep3_peak_156
chr1	55734914	55735515	602	55735403	132.21	34.6833	3.60038	31.4565	WT_rep3_peak_157
chr1	55736128	55737346	1219	55736940	271.97	243.038	18.6631	239.092	WT_rep3_peak_158
chr1	56835256	56836197	942	56835752	112.5	62.0273	7.76001	58.6183	WT_rep3_peak_159
chr1	57422004	57422767	764	57422378	180.92	132.124	12.4384	128.443	WT_rep3_peak_160
chr1	57427614	57427763	150	57427691	44.07	10.7979	3.08159	7.84597	WT_rep3_peak_161
chr1	58424049	58424199	151	58424144	75.97	30.8968	5.26221	27.697	WT_rep3_peak_162
chr1	58425460	58425609	150	58425557	53.35	15.9023	3.71595	12.8665	WT_rep3_peak_163
chr1	58500513	58500872	360	58500695	62.63	21.6462	4.35032	18.5398	WT_rep3_peak_164
chr1	58502809	58503102	294	58502859	103.22	53.8959	7.12565	50.5313	WT_rep3_peak_165
chr1	58568860	58569450	591	58569305	414.62	221.417	7.99267	217.513	WT_rep3_peak_166
chr1	58941801	58943297	1497	58942592	2372.9	2036.24	18.4023	2030.97	WT_rep3_peak_167
chr1	59202178	59202611	434	59202540	179.76	131	12.3591	127.323	WT_rep3_peak_168
chr1	59203141	59203303	163	59203274	108.44	58.3737	7.48248	54.9844	WT_rep3_peak_169
chr1	59254638	59254787	150	59254747	85.82	29.18	4.42976	25.9996	WT_rep3_peak_170
chr1	59523859	59524136	278	59523995	47.55	12.4216	3.31948	9.44188	WT_rep3_peak_171
chr1	59678654	59679171	518	59678991	544.51	644.089	37.2975	639.637	WT_rep3_peak_172
chr1	59749570	59749747	178	59749663	78.86	33.1733	5.46045	29.9546	WT_rep3_peak_173
chr1	59803475	59803708	234	59803587	329.38	273.224	16.2347	269.224	WT_rep3_peak_174
chr1	59906596	59907671	1076	59907141	402.44	196.355	7.07792	192.505	WT_rep3_peak_175
chr1	59909501	59909755	255	59909640	119.46	47.2022	5.23725	43.8807	WT_rep3_peak_176
chr1	60020639	60021487	849	60021103	648.89	814.798	44.4341	810.202	WT_rep3_peak_177
chr1	60021747	60021911	165	60021795	44.65	10.7979	3.12124	7.84597	WT_rep3_peak_178
chr1	60029753	60030238	486	60030097	139.75	88.1911	9.62345	84.6627	WT_rep3_peak_179
chr1	60515764	60516550	787	60516224	952.17	1104.89	36.5902	1100.08	WT_rep3_peak_180
chr1	60517808	60517957	150	60517948	56.83	17.5106	3.90736	14.4571	WT_rep3_peak_181
chr1	60527372	60527999	628	60527609	374.61	359.472	22.0945	355.342	WT_rep3_peak_182
chr1	62742914	62743409	496	62743187	570.03	531.156	21.1492	526.818	WT_rep3_peak_183
chr1	62758040	62758201	162	62758087	104.38	54.7833	7.20495	51.4133	WT_rep3_peak_184
chr1	62854687	62855195	509	62854935	360.11	360.469	24.074	356.337	WT_rep3_peak_185
chr1	63097079	63097613	535	63097524	155.41	104.79	10.6939	101.198	WT_rep3_peak_186
chr1	63097757	63097906	150	63097830	52.19	15.3017	3.63666	12.2754	WT_rep3_peak_187
chr1	63098087	63098266	180	63098118	73.65	29.4072	5.10362	26.2221	WT_rep3_peak_188
chr1	63125182	63125664	483	63125354	278.93	252.185	19.1389	248.221	WT_rep3_peak_189
chr1	63344119	63344268	150	63344260	48.13	8.90178	2.58582	5.99084	WT_rep3_peak_190
chr1	63346453	63346636	184	63346599	94.52	46.1004	6.53093	42.7859	WT_rep3_peak_191
chr1	63348864	63349092	229	63348972	62.63	21.6462	4.35032	18.5398	WT_rep3_peak_192
chr1	63556386	63556541	156	63556426	46.97	11.8714	3.27983	8.89882	WT_rep3_peak_193
chr1	63631849	63632594	746	63632089	364.17	370.256	24.9671	366.11	WT_rep3_peak_194
chr1	63770869	63771266	398	63771010	102.06	53.0126	7.04635	49.6538	WT_rep3_peak_195
chr1	64074021	64074978	958	64074679	262.69	231.394	18.0287	227.47	WT_rep3_peak_196
chr1	64118023	64118321	299	64118038	106.7	25.8298	3.3656	22.6804	WT_rep3_peak_197
chr1	64636258	64636982	725	64636646	322.42	311.347	22.1124	307.286	WT_rep3_peak_198
chr1	64762748	64763028	281	64762888	75.39	30.8968	5.22256	27.697	WT_rep3_peak_199
chr1	64833532	64834031	500	64833783	238.33	201.007	16.3636	197.147	WT_rep3_peak_200
chr1	64960919	64961259	341	64961212	64.37	23.0001	4.46926	19.8778	WT_rep3_peak_201
chr1	64961606	64961755	150	64961653	53.35	15.9023	3.71595	12.8665	WT_rep3_peak_202
chr1	64976919	64977464	546	64977188	274.29	215.592	14.4888	211.701	WT_rep3_peak_203
chr1	65285497	65286293	797	65285634	200.64	142.085	11.8612	138.376	WT_rep3_peak_204
chr1	65312742	65313086	345	65312828	63.21	22.3198	4.38996	19.2056	WT_rep3_peak_205
chr1	66451650	66452196	547	66451777	865.77	179.287	3.17498	175.478	WT_rep3_peak_206
chr1	66453853	66454144	292	66453918	1146.44	205.353	2.89027	201.483	WT_rep3_peak_207
chr1	66700140	66700289	150	66700185	48.13	12.9807	3.35912	9.99094	WT_rep3_peak_208
chr1	66700630	66700779	150	66700667	73.65	29.4072	5.10362	26.2221	WT_rep3_peak_209
chr1	66734421	66734958	538	66734828	1213.12	1152.02	22.6304	1147.19	WT_rep3_peak_210
chr1	66736851	66737000	150	66736937	53.35	15.9023	3.71595	12.8665	WT_rep3_peak_211
chr1	66740355	66740611	257	66740560	44.65	10.7979	3.12124	7.84597	WT_rep3_peak_212
chr1	66840291	66840979	689	66840831	133.95	82.1656	9.22697	78.6613	WT_rep3_peak_213
chr1	68077880	68078165	286	68078024	71.91	22.4631	4.05033	19.3479	WT_rep3_peak_214
chr1	68079083	68079550	468	68079371	335.75	251.229	13.4702	247.268	WT_rep3_peak_215
chr1	69005377	69005663	287	69005504	95.68	46.949	6.61023	43.6283	WT_rep3_peak_216
chr1	72340460	72340705	246	72340556	35.37	6.4551	2.48688	3.59953	WT_rep3_peak_217
chr1	72467781	72468202	422	72467916	76.55	31.6501	5.30186	28.4452	WT_rep3_peak_218
chr1	72574985	72575545	561	72575232	72.49	28.671	5.02432	25.4931	WT_rep3_peak_219
chr1	72625206	72625494	289	72625398	490	411.407	16.9312	407.203	WT_rep3_peak_220
chr1	72897670	72898530	861	72898395	245.29	78.576	4.39807	75.0877	WT_rep3_peak_221
chr1	72898678	72899681	1004	72899426	2122.39	2829.94	55.8786	2824.38	WT_rep3_peak_222
chr1	72901229	72901447	219	72901344	387.94	218.712	8.62404	214.814	WT_rep3_peak_223
chr1	73953504	73953702	199	73953612	85.24	38.6725	5.89657	35.4099	WT_rep3_peak_224
chr1	74478280	74478429	150	74478380	49.29	13.5484	3.43842	10.5486	WT_rep3_peak_225
chr1	74605833	74606270	438	74606141	73.07	28.6968	4.93772	25.5185	WT_rep3_peak_226
chr1	74609568	74609737	170	74609700	51.61	14.709	3.59701	11.6927	WT_rep3_peak_227
chr1	74718721	74719176	456	74718914	106.7	56.5704	7.36353	53.1907	WT_rep3_peak_228
chr1	74895060	74896127	1068	74895315	962.61	810.934	17.4726	806.342	WT_rep3_peak_229
chr1	75123247	75123736	490	75123592	173.39	43.9792	3.5589	40.6801	WT_rep3_peak_230
chr1	75191636	75192148	513	75191774	1425.94	1676.78	38.566	1671.67	WT_rep3_peak_231
chr1	75192290	75192541	252	75192424	2479.6	1985.09	16.0038	1979.83	WT_rep3_peak_232
chr1	75192773	75193197	425	75193054	3302.45	3415.55	28.1026	3409.79	WT_rep3_peak_233
chr1	75365241	75365600	360	75365343	187.88	20.8322	2.17107	17.7374	WT_rep3_peak_234
chr1	75408201	75408567	367	75408330	291.68	60.1366	3.11365	56.7394	WT_rep3_peak_235
chr1	75451249	75451883	635	75451432	189.62	135.007	11.9139	131.319	WT_rep3_peak_236
chr1	75452072	75452406	335	75452275	91.04	32.6021	4.60211	29.3893	WT_rep3_peak_237
chr1	75454071	75454404	334	75454220	124.1	53.0385	5.68617	49.6796	WT_rep3_peak_238
chr1	75483092	75483408	317	75483228	67.27	25.0799	4.6675	21.9363	WT_rep3_peak_239
chr1	77344938	77346418	1481	77346269	523.64	495.542	21.8599	491.24	WT_rep3_peak_240
chr1	77349579	77350606	1028	77349852	760.23	632.491	16.9163	628.051	WT_rep3_peak_241
chr1	77483302	77483884	583	77483661	1217.76	671.419	8.52281	666.941	WT_rep3_peak_242
chr1	78642109	78642283	175	78642225	201.22	121.49	9.19185	117.843	WT_rep3_peak_243
chr1	78642609	78643429	821	78643123	399.54	314.08	14.8349	310.015	WT_rep3_peak_244
chr1	78643637	78644575	939	78643872	199.48	144.569	12.2995	140.852	WT_rep3_peak_245
chr1	78659531	78659680	150	78659607	125.26	47.8008	5.05022	44.4753	WT_rep3_peak_246
chr1	78683942	78684408	467	78684084	300.38	51.6159	2.76497	48.2662	WT_rep3_peak_247
chr1	79412763	79413373	611	79413006	234.27	87.6731	5.11466	84.1478	WT_rep3_peak_248
chr1	79413639	79414320	682	79413976	1066.41	502.302	6.88653	497.992	WT_rep3_peak_249
chr1	79755597	79755756	160	79755674	51.03	14.709	3.55736	11.6927	WT_rep3_peak_250
chr1	80244679	80245086	408	80244949	252.83	102.947	5.64068	99.3618	WT_rep3_peak_251
chr1	80583161	80583335	175	80583221	57.99	18.3821	4.03313	15.3128	WT_rep3_peak_252
chr1	80595391	80595542	152	80595437	51.03	14.709	3.55736	11.6927	WT_rep3_peak_253
chr1	82215033	82215404	372	82215144	146.13	95.3609	10.0596	91.8039	WT_rep3_peak_254
chr1	82264510	82265328	819	82264622	178.03	129.879	12.2402	126.206	WT_rep3_peak_255
chr1	82265968	82266131	164	82266053	93.94	45.2563	6.49129	41.9463	WT_rep3_peak_256
chr1	83253499	83254054	556	83253753	517.84	218.015	5.96367	214.118	WT_rep3_peak_257
chr1	83256529	83257060	532	83256665	212.82	98.3568	6.48918	94.7899	WT_rep3_peak_258
chr1	84014613	84014762	150	84014757	67.27	25.0799	4.6675	21.9363	WT_rep3_peak_259
chr1	84014909	84015882	974	84015315	155.41	104.79	10.6939	101.198	WT_rep3_peak_260
chr1	84255451	84255912	462	84255518	50.45	12.5779	3.21563	9.59689	WT_rep3_peak_261
chr1	84702277	84702628	352	84702484	96.84	16.459	2.64435	13.4198	WT_rep3_peak_262
chr1	84763872	84764048	177	84763926	103.22	53.8959	7.12565	50.5313	WT_rep3_peak_263
chr1	84771247	84772161	915	84771847	712.68	437.269	9.91223	433.033	WT_rep3_peak_264
chr1	84890485	84890696	212	84890581	53.35	15.9023	3.71595	12.8665	WT_rep3_peak_265
chr1	85776967	85777704	738	85777331	672.67	551.946	16.4309	547.587	WT_rep3_peak_266
chr1	86061213	86061362	150	86061356	192.52	48.9299	3.58375	45.5977	WT_rep3_peak_267
chr1	86064564	86064715	152	86064685	246.45	58.7489	3.43683	55.3584	WT_rep3_peak_268
chr1	86278023	86278775	753	86278383	683.11	440.507	10.6892	436.268	WT_rep3_peak_269
chr1	86284168	86284523	356	86284439	1746.62	855.58	7.27417	850.953	WT_rep3_peak_270
chr1	86284715	86285066	352	86284841	1093.67	168.794	2.64412	165.012	WT_rep3_peak_271
chr1	86457398	86457704	307	86457683	458.11	40.5916	2.00485	37.3167	WT_rep3_peak_272
chr1	87165765	87165915	151	87165782	52.19	15.3017	3.63666	12.2754	WT_rep3_peak_273
chr1	87166140	87166684	545	87166648	69.01	26.4981	4.78644	23.3411	WT_rep3_peak_274
chr1	88193760	88194088	329	88193919	123.52	72.3838	8.51332	68.9237	WT_rep3_peak_275
chr1	88628017	88628437	421	88628319	55.67	17.127	3.87454	14.0756	WT_rep3_peak_276
chr1	88628604	88628983	380	88628837	336.33	236.437	12.0477	232.504	WT_rep3_peak_277
chr1	89080943	89081405	463	89081006	52.77	15.3017	3.67631	12.2754	WT_rep3_peak_278
chr1	89816403	89817030	628	89816902	171.65	80.7857	6.55205	77.2889	WT_rep3_peak_279
chr1	89818026	89818770	745	89818332	281.82	256.128	19.3371	252.157	WT_rep3_peak_280
chr1	90539942	90540091	150	90539979	91.04	21.9871	3.28722	18.8789	WT_rep3_peak_281
chr1	90540260	90540776	517	90540633	131.63	80.1827	9.06838	76.6873	WT_rep3_peak_282
chr1	91055767	91056450	684	91056239	117.72	66.6801	8.11684	63.2469	WT_rep3_peak_283
chr1	91213171	91213620	450	91213389	201.8	148.416	12.675	144.687	WT_rep3_peak_284
chr1	91344173	91344647	475	91344312	166.43	98.3148	8.81197	94.748	WT_rep3_peak_285
chr1	91345207	91345877	671	91345586	168.75	93.3878	8.08319	89.8384	WT_rep3_peak_286
chr1	91428656	91429062	407	91428865	277.77	111.654	5.57531	108.039	WT_rep3_peak_287
chr1	91482737	91483002	266	91482870	60.31	20.3195	4.19172	17.2272	WT_rep3_peak_288
chr1	91860070	91860974	905	91860796	396.64	400.593	24.8527	396.402	WT_rep3_peak_289
chr1	92847457	92848072	616	92848011	66.69	13.1372	2.82029	10.1461	WT_rep3_peak_290
chr1	93227317	93227496	180	93227431	68.43	25.7859	4.74679	22.6367	WT_rep3_peak_291
chr1	93229218	93229551	334	93229347	176.29	127.644	12.1212	123.977	WT_rep3_peak_292
chr1	93293381	93294203	823	93294056	195.42	108.742	8.18424	105.137	WT_rep3_peak_293
chr1	93779534	93779715	182	93779648	57.99	18.3821	4.03313	15.3128	WT_rep3_peak_294
chr1	95519071	95519730	660	95519474	83.5	37.0754	5.77763	33.8259	WT_rep3_peak_295
chr1	97573305	97573941	637	97573570	216.3	128.783	9.05407	125.113	WT_rep3_peak_296
chr1	104921907	104922292	386	104922157	200.06	155.079	13.7468	151.333	WT_rep3_peak_297
chr1	105958238	105959031	794	105958565	125.84	74.3131	8.67191	70.8436	WT_rep3_peak_298
chr1	106320368	106321250	883	106321028	1030.46	839.761	16.3724	835.146	WT_rep3_peak_299
chr1	106469544	106469898	355	106469656	97.42	48.6597	6.72917	45.3284	WT_rep3_peak_300
chr1	106640156	106640315	160	106640211	98.58	49.5217	6.80847	46.1845	WT_rep3_peak_301
chr1	106640584	106640733	150	106640684	59.15	19.6665	4.11243	16.5826	WT_rep3_peak_302
chr1	106652359	106652780	422	106652668	139.75	88.1911	9.62345	84.6627	WT_rep3_peak_303
chr1	111787619	111787846	228	111787734	99.16	50.388	6.84812	47.045	WT_rep3_peak_304
chr1	111789150	111789299	150	111789186	50.45	14.1246	3.51771	11.1181	WT_rep3_peak_305
chr1	111791181	111791446	266	111791302	103.22	53.8959	7.12565	50.5313	WT_rep3_peak_306
chr1	118347375	118347547	173	118347452	91.04	43.5819	6.29305	40.2843	WT_rep3_peak_307
chr1	118536394	118536968	575	118536539	432.02	368.034	17.3206	363.892	WT_rep3_peak_308
chr1	118763934	118764098	165	118764051	53.93	15.9023	3.7556	12.8665	WT_rep3_peak_309
chr1	119454909	119455533	625	119455001	60.89	20.3195	4.23137	17.2272	WT_rep3_peak_310
chr1	119586846	119587713	868	119587309	309.08	293.58	21.2006	289.546	WT_rep3_peak_311
chr1	120270377	120270810	434	120270703	168.17	96.7211	8.45836	93.1591	WT_rep3_peak_312
chr1	123261778	123262154	377	123262004	194.26	148.098	13.3503	144.37	WT_rep3_peak_313
chr1	124213515	124213664	150	124213560	56.25	17.7508	3.91419	14.6903	WT_rep3_peak_314
chr1	125796355	125796546	192	125796433	81.76	35.4988	5.65869	32.261	WT_rep3_peak_315
chr1	125800070	125800624	555	125800143	1767.49	1066.54	9.77069	1061.76	WT_rep3_peak_316
chr1	125800786	125801097	312	125800949	126.42	75.283	8.71155	71.8087	WT_rep3_peak_317
chr1	127410169	127410808	640	127410447	256.31	223.705	17.5926	219.796	WT_rep3_peak_318
chr1	127730034	127731707	1674	127731130	402.44	412.558	25.6969	408.352	WT_rep3_peak_319
chr1	127751541	127751699	159	127751657	82.34	36.2845	5.69833	33.0401	WT_rep3_peak_320
chr1	128188434	128188589	156	128188571	132.21	17.7505	2.33709	14.6903	WT_rep3_peak_321
chr1	128190407	128190630	224	128190529	255.15	103.171	5.56848	99.5854	WT_rep3_peak_322
chr1	128193950	128194100	151	128194025	128.15	77.2328	8.8305	73.7501	WT_rep3_peak_323
chr1	128226282	128226574	293	128226407	79.44	33.9432	5.5001	30.7193	WT_rep3_peak_324
chr1	128227612	128228929	1318	128227753	610.04	751.518	41.7777	746.975	WT_rep3_peak_325
chr1	128235558	128235907	350	128235618	56.25	17.7508	3.91419	14.6903	WT_rep3_peak_326
chr1	130618345	130618905	561	130618472	69.59	26.4981	4.82609	23.3411	WT_rep3_peak_327
chr1	130646584	130647406	823	130646708	113.66	62.9504	7.83931	59.5363	WT_rep3_peak_328
chr1	131056291	131057455	1165	131056435	161.79	111.202	11.1301	107.588	WT_rep3_peak_329
chr1	131107357	131107682	326	131107433	49.29	13.5484	3.43842	10.5486	WT_rep3_peak_330
chr1	131214413	131214582	170	131214464	52.19	15.3017	3.63666	12.2754	WT_rep3_peak_331
chr1	131217124	131217347	224	131217220	95.1	46.949	6.57058	43.6283	WT_rep3_peak_332
chr1	131855751	131855906	156	131855802	238.33	139.292	8.8642	135.591	WT_rep3_peak_333
chr1	131857217	131857399	183	131857352	175.71	22.6197	2.32507	19.5035	WT_rep3_peak_334
chr1	131858697	131858868	172	131858806	117.72	66.6801	8.11684	63.2469	WT_rep3_peak_335
chr1	131945759	131946181	423	131946033	284.72	260.085	19.5354	256.107	WT_rep3_peak_336
chr1	131954751	131955248	498	131954998	118.88	67.6217	8.19614	64.1836	WT_rep3_peak_337
chr1	132285502	132285653	152	132285563	50.45	14.1246	3.51771	11.1181	WT_rep3_peak_338
chr1	132286723	132286888	166	132286788	209.92	112.115	7.81181	108.499	WT_rep3_peak_339
chr1	132288035	132288746	712	132288168	1118.6	906.516	16.2261	901.848	WT_rep3_peak_340
chr1	132318920	132319290	371	132319022	340.39	162.097	6.82787	158.332	WT_rep3_peak_341
chr1	132377019	132377619	601	132377365	110.18	60.1927	7.60142	56.7929	WT_rep3_peak_342
chr1	132431519	132431945	427	132431629	161.21	57.3242	4.77084	53.9419	WT_rep3_peak_343
chr1	132441752	132442548	797	132442498	70.75	27.2164	4.90538	24.0517	WT_rep3_peak_344
chr1	132442714	132443242	529	132442813	104.96	54.7833	7.24459	51.4133	WT_rep3_peak_345
chr1	132496902	132497692	791	132497393	177.45	98.5058	8.11115	94.9369	WT_rep3_peak_346
chr1	132525238	132525387	150	132525361	51.61	14.709	3.59701	11.6927	WT_rep3_peak_347
chr1	132526255	132526676	422	132526565	116.56	55.9518	6.53096	52.5767	WT_rep3_peak_348
chr1	132535308	132535915	608	132535424	80.02	34.7183	5.53974	31.4876	WT_rep3_peak_349
chr1	132865456	132867664	2209	132866452	909.26	589.042	10.8365	584.644	WT_rep3_peak_350
chr1	132919371	132920052	682	132919666	627.44	563.046	19.6387	558.675	WT_rep3_peak_351
chr1	132994468	132994647	180	132994542	38.85	7.80868	2.72476	4.91926	WT_rep3_peak_352
chr1	133060323	133061269	947	133060828	299.8	249.852	16.3479	245.893	WT_rep3_peak_353
chr1	133064309	133064570	262	133064432	60.31	17.0741	3.60637	14.0282	WT_rep3_peak_354
chr1	133227961	133228110	150	133228069	242.97	47.002	2.97527	43.6811	WT_rep3_peak_355
chr1	133228640	133229022	383	133228674	86.4	34.0435	5.08158	30.8191	WT_rep3_peak_356
chr1	133547831	133548328	498	133548065	383.31	314.364	16.0127	310.298	WT_rep3_peak_357
chr1	133548832	133549564	733	133549416	236.01	127.424	7.90046	123.759	WT_rep3_peak_358
chr1	133584555	133584705	151	133584686	98	45.9809	6.18755	42.6683	WT_rep3_peak_359
chr1	133584960	133586053	1094	133585080	100.32	51.2586	6.92741	47.9099	WT_rep3_peak_360
chr1	133586914	133587740	827	133587271	513.2	308.655	9.52222	304.598	WT_rep3_peak_361
chr1	133634165	133634842	678	133634457	110.18	60.1927	7.60142	56.7929	WT_rep3_peak_362
chr1	133680969	133681457	489	133681178	461.01	513.978	31.5882	509.658	WT_rep3_peak_363
chr1	133840063	133840325	263	133840205	176.29	127.644	12.1212	123.977	WT_rep3_peak_364
chr1	133842199	133842613	415	133842410	242.39	87.9703	4.9672	84.4441	WT_rep3_peak_365
chr1	134004797	134005209	413	134005097	174.55	118.711	10.9716	115.074	WT_rep3_peak_366
chr1	134127065	134127450	386	134127385	151.93	43.0449	3.89631	39.7527	WT_rep3_peak_367
chr1	134128987	134129445	459	134129303	536.98	209.688	5.48954	205.81	WT_rep3_peak_368
chr1	134129683	134131039	1357	134129802	1670.65	1824.5	31.8714	1819.32	WT_rep3_peak_369
chr1	134162292	134162519	228	134162376	159.47	49.7169	4.22286	46.3791	WT_rep3_peak_370
chr1	134226012	134226162	151	134226023	48.13	12.9807	3.35912	9.99094	WT_rep3_peak_371
chr1	134359651	134359938	288	134359829	52.19	15.3017	3.63666	12.2754	WT_rep3_peak_372
chr1	134433833	134434392	560	134434158	162.37	112.28	11.1697	108.662	WT_rep3_peak_373
chr1	134558165	134558471	307	134558201	208.76	128.433	9.53451	124.764	WT_rep3_peak_374
chr1	134558728	134559357	630	134559034	211.66	105.178	7.08862	101.585	WT_rep3_peak_375
chr1	134675856	134676415	560	134676158	101.48	52.1335	7.00671	48.7804	WT_rep3_peak_376
chr1	134676565	134676715	151	134676661	54.51	16.5108	3.79525	13.4685	WT_rep3_peak_377
chr1	134682565	134682714	150	134682680	67.27	25.0799	4.6675	21.9363	WT_rep3_peak_378
chr1	134682951	134683348	398	134683051	183.82	122.793	10.7456	119.142	WT_rep3_peak_379
chr1	135088110	135088259	150	135088135	65.53	12.6697	2.77197	9.68794	WT_rep3_peak_380
chr1	135088708	135089299	592	135089047	111.92	22.5544	2.97153	19.4386	WT_rep3_peak_381
chr1	135094963	135095112	150	135095002	95.68	22.0472	3.22271	18.9387	WT_rep3_peak_382
chr1	135229397	135229657	261	135229533	128.73	46.3601	4.80499	43.0446	WT_rep3_peak_383
chr1	135298826	135299077	252	135298959	62.05	12.0979	2.74121	9.12355	WT_rep3_peak_384
chr1	135310759	135310986	228	135310859	52.77	15.3017	3.67631	12.2754	WT_rep3_peak_385
chr1	135312694	135313222	529	135312974	944.64	1144.22	41.1146	1139.39	WT_rep3_peak_386
chr1	135366336	135366704	369	135366473	127.58	76.2562	8.79085	72.7781	WT_rep3_peak_387
chr1	135368122	135369625	1504	135369140	1188.77	1230.13	27.669	1225.25	WT_rep3_peak_388
chr1	135397453	135397785	333	135397515	67.27	14.4988	2.96812	11.4892	WT_rep3_peak_389
chr1	135512309	135512619	311	135512495	130.47	37.2098	3.8669	33.9598	WT_rep3_peak_390
chr1	136103391	136104112	722	136103857	67.85	25.0799	4.70714	21.9363	WT_rep3_peak_391
chr1	136104732	136104885	154	136104760	85.82	38.6725	5.93622	35.4099	WT_rep3_peak_392
chr1	136198146	136198955	810	136198640	993.93	1067.38	30.1493	1062.6	WT_rep3_peak_393
chr1	136204330	136204631	302	136204493	419.26	97.6362	3.41673	94.071	WT_rep3_peak_394
chr1	136204960	136205213	254	136205073	292.84	153.704	7.73271	149.962	WT_rep3_peak_395
chr1	136208052	136208783	732	136208348	474.35	286.785	9.58362	282.762	WT_rep3_peak_396
chr1	136553288	136554624	1337	136554204	551.47	488.896	19.0508	484.602	WT_rep3_peak_397
chr1	136554810	136555683	874	136555341	464.49	518.575	31.8261	514.25	WT_rep3_peak_398
chr1	139351310	139351809	500	139351601	211.66	110.893	7.59495	107.282	WT_rep3_peak_399
chr1	139374742	139375163	422	139374880	171.65	122.1	11.8041	118.451	WT_rep3_peak_400
chr1	143516572	143517031	460	143516750	132.79	39.7667	4.05437	36.4965	WT_rep3_peak_401
chr1	143521613	143521800	188	143521722	244.13	156.86	10.2139	153.109	WT_rep3_peak_402
chr1	143521948	143523207	1260	143522283	967.25	1146.19	38.73	1141.36	WT_rep3_peak_403
chr1	143633347	143633500	154	143633362	113.08	17.9528	2.53506	14.8912	WT_rep3_peak_404
chr1	143646345	143646706	362	143646443	312.56	297.659	21.4384	293.619	WT_rep3_peak_405
chr1	143877142	143877606	465	143877279	143.81	92.2701	9.90098	88.7253	WT_rep3_peak_406
chr1	146777243	146777814	572	146777377	208.76	164.508	14.3415	160.736	WT_rep3_peak_407
chr1	150315707	150315856	150	150315812	131.05	37.8129	3.88395	34.5606	WT_rep3_peak_408
chr1	150316066	150316217	152	150316142	71.33	27.9407	4.94503	24.7685	WT_rep3_peak_409
chr1	151694031	151695123	1093	151694398	1219.5	1743.69	67.8057	1738.55	WT_rep3_peak_410
chr1	151767036	151767370	335	151767306	77.12	32.409	5.34151	29.1972	WT_rep3_peak_411
chr1	151768539	151769141	603	151769061	371.13	380.285	25.4428	376.124	WT_rep3_peak_412
chr1	152393735	152395058	1324	152394765	513.2	509.237	24.1976	504.921	WT_rep3_peak_413
chr1	152397110	152397259	150	152397180	53.35	15.9023	3.71595	12.8665	WT_rep3_peak_414
chr1	152400477	152400652	176	152400563	86.98	15.8513	2.74947	12.8214	WT_rep3_peak_415
chr1	152713496	152713989	494	152713864	370.55	169.47	6.51838	165.686	WT_rep3_peak_416
chr1	152991391	152991540	150	152991460	59.73	19.6665	4.15208	16.5826	WT_rep3_peak_417
chr1	153096887	153097543	657	153097452	93.36	45.2563	6.45164	41.9463	WT_rep3_peak_418
chr1	153568348	153568947	600	153568662	154.25	75.0933	6.74999	71.6217	WT_rep3_peak_419
chr1	153569846	153569995	150	153569966	98	14.5178	2.41465	11.5081	WT_rep3_peak_420
chr1	153571384	153571580	197	153571497	85.82	38.6725	5.93622	35.4099	WT_rep3_peak_421
chr1	153571723	153572328	606	153571861	99.74	50.388	6.88776	47.045	WT_rep3_peak_422
chr1	153619750	153619936	187	153619801	132.21	81.1725	9.10803	77.6727	WT_rep3_peak_423
chr1	153783692	153784440	749	153783883	2919.15	2061.61	12.6963	2056.32	WT_rep3_peak_424
chr1	154267231	154267493	263	154267240	109.6	15.9543	2.42807	12.9181	WT_rep3_peak_425
chr1	154273452	154274567	1116	154274111	5979.21	5109.94	18.3442	5103.88	WT_rep3_peak_426
chr1	154294864	154295240	377	154294947	74.81	30.1491	5.18292	26.9565	WT_rep3_peak_427
chr1	154347843	154348214	372	154347956	1635.86	1054.27	10.8401	1049.5	WT_rep3_peak_428
chr1	154602055	154602402	348	154602118	168.75	87.5465	7.41253	84.0215	WT_rep3_peak_429
chr1	154973452	154974401	950	154974181	439.55	415.995	21.6488	411.785	WT_rep3_peak_430
chr1	155077752	155078394	643	155078134	192.52	109.25	8.41402	105.644	WT_rep3_peak_431
chr1	155152284	155152447	164	155152433	39.43	8.28157	2.76441	5.38395	WT_rep3_peak_432
chr1	155156336	155156826	491	155156542	295.16	274.71	20.249	270.708	WT_rep3_peak_433
chr1	155655222	155655628	407	155655358	126.42	75.283	8.71155	71.8087	WT_rep3_peak_434
chr1	155722736	155723274	539	155722925	220.36	178.898	15.1345	175.089	WT_rep3_peak_435
chr1	155723494	155723643	150	155723530	47.55	12.4216	3.31948	9.44188	WT_rep3_peak_436
chr1	155723825	155724108	284	155723970	73.07	29.4072	5.06397	26.2221	WT_rep3_peak_437
chr1	155737506	155737727	222	155737585	81.18	35.4988	5.61904	32.261	WT_rep3_peak_438
chr1	155738107	155738387	281	155738247	143.23	92.2701	9.86134	88.7253	WT_rep3_peak_439
chr1	155803931	155804095	165	155804004	71.91	27.2538	4.8604	24.0887	WT_rep3_peak_440
chr1	155804317	155804909	593	155804788	76.55	21.5405	3.69262	18.4391	WT_rep3_peak_441
chr1	155808600	155809023	424	155808833	140.91	18.9799	2.36521	15.9071	WT_rep3_peak_442
chr1	155828954	155829389	436	155829141	727.76	949.384	49.8261	944.683	WT_rep3_peak_443
chr1	155882530	155883439	910	155882678	288.2	265.382	19.7732	261.395	WT_rep3_peak_444
chr1	155927062	155927614	553	155927385	451.15	480.455	28.2595	476.169	WT_rep3_peak_445
chr1	155940836	155941476	641	155941161	77.7	32.409	5.38115	29.1972	WT_rep3_peak_446
chr1	156468519	156468876	358	156468739	103.22	21.336	2.97771	18.2359	WT_rep3_peak_447
chr1	156469020	156470625	1606	156470407	547.41	342.697	10.1558	338.591	WT_rep3_peak_448
chr1	156508414	156509291	878	156508968	289.94	204.832	12.1226	200.964	WT_rep3_peak_449
chr1	156533307	156533536	230	156533373	53.93	15.9023	3.7556	12.8665	WT_rep3_peak_450
chr1	156636378	156636639	262	156636521	64.95	23.0001	4.50891	19.8778	WT_rep3_peak_451
chr1	156967945	156968470	526	156968262	78.86	33.1733	5.46045	29.9546	WT_rep3_peak_452
chr1	156975275	156975509	235	156975392	78.86	21.4849	3.63021	18.3839	WT_rep3_peak_453
chr1	156984519	156985149	631	156984607	175.13	92.9215	7.59163	89.3752	WT_rep3_peak_454
chr1	157003386	157003751	366	157003571	340.39	336.321	23.3415	332.223	WT_rep3_peak_455
chr1	157096536	157096953	418	157096616	51.03	14.709	3.55736	11.6927	WT_rep3_peak_456
chr1	158073392	158073840	449	158073539	1056.55	819.411	14.8951	814.812	WT_rep3_peak_457
chr1	158074047	158074417	371	158074278	1202.11	981.914	16.4809	977.189	WT_rep3_peak_458
chr1	158123325	158123475	151	158123372	74.23	27.607	4.70159	24.4402	WT_rep3_peak_459
chr1	158183153	158183465	313	158183367	111.92	48.4393	5.80556	45.1104	WT_rep3_peak_460
chr1	158516046	158517102	1057	158516292	966.67	605.659	10.2944	601.245	WT_rep3_peak_461
chr1	158517473	158517628	156	158517503	91.62	26.6817	3.85925	23.5236	WT_rep3_peak_462
chr1	159401094	159401260	167	159401201	99.16	36.4573	4.76955	33.2122	WT_rep3_peak_463
chr1	159585034	159585532	499	159585305	53.35	13.1415	3.19703	10.1502	WT_rep3_peak_464
chr1	159677593	159678040	448	159677935	226.16	44.5707	2.98889	41.2662	WT_rep3_peak_465
chr1	159679534	159679992	459	159679655	377.51	180.357	6.88193	176.545	WT_rep3_peak_466
chr1	159751871	159752049	179	159751977	60.89	20.3195	4.23137	17.2272	WT_rep3_peak_467
chr1	159753641	159755032	1392	159753845	345.03	186.463	8.04727	182.637	WT_rep3_peak_468
chr1	160051593	160052086	494	160051938	510.88	487.389	22.2557	483.096	WT_rep3_peak_469
chr1	160054055	160054298	244	160054181	230.79	92.422	5.51893	88.8769	WT_rep3_peak_470
chr1	160847077	160847555	479	160847439	259.21	227.542	17.7909	223.625	WT_rep3_peak_471
chr1	160859486	160859774	289	160859581	156.57	105.852	10.7732	102.257	WT_rep3_peak_472
chr1	160978476	160978780	305	160978739	44.07	10.7979	3.08159	7.84597	WT_rep3_peak_473
chr1	161645876	161646407	532	161646085	729.5	952.842	49.9451	948.137	WT_rep3_peak_474
chr1	161661823	161661983	161	161661934	52.19	15.3017	3.63666	12.2754	WT_rep3_peak_475
chr1	161662138	161662524	387	161662285	80.02	34.7183	5.53974	31.4876	WT_rep3_peak_476
chr1	161798179	161798330	152	161798321	85.82	37.8214	5.78822	34.5689	WT_rep3_peak_477
chr1	161798783	161799014	232	161798926	103.22	53.8959	7.12565	50.5313	WT_rep3_peak_478
chr1	162476220	162476750	531	162476368	93.36	45.2563	6.45164	41.9463	WT_rep3_peak_479
chr1	162532551	162533846	1296	162532974	361.27	142.585	5.48893	138.874	WT_rep3_peak_480
chr1	162534005	162534154	150	162534077	139.17	23.2732	2.64477	20.1494	WT_rep3_peak_481
chr1	162537127	162537342	216	162537245	130.47	51.1953	5.23073	47.8496	WT_rep3_peak_482
chr1	162537884	162538284	401	162538089	851.85	101.482	2.30501	97.9033	WT_rep3_peak_483
chr1	163779772	163780003	232	163779908	95.68	46.949	6.61023	43.6283	WT_rep3_peak_484
chr1	164107795	164108116	322	164107925	119.46	49.1966	5.4753	45.8636	WT_rep3_peak_485
chr1	164265830	164266007	178	164265904	1304.75	287.938	3.33098	283.914	WT_rep3_peak_486
chr1	165138012	165138543	532	165138407	203.54	112.928	8.18161	109.31	WT_rep3_peak_487
chr1	165144679	165144865	187	165144788	84.08	37.8714	5.81728	34.6154	WT_rep3_peak_488
chr1	165146230	165146418	189	165146312	180.34	132.124	12.3988	128.443	WT_rep3_peak_489
chr1	165148994	165149982	989	165149216	472.03	389.153	16.3113	384.978	WT_rep3_peak_490
chr1	165421060	165421237	178	165421110	53.35	15.9023	3.71595	12.8665	WT_rep3_peak_491
chr1	165702940	165703332	393	165703085	309.08	293.58	21.2006	289.546	WT_rep3_peak_492
chr1	166138389	166140262	1874	166139639	1025.82	1472.77	68.0013	1467.76	WT_rep3_peak_493
chr1	166142114	166142265	152	166142211	64.37	17.0035	3.44039	13.9582	WT_rep3_peak_494
chr1	166226044	166227121	1078	166226770	142.65	70.1597	6.84058	66.7109	WT_rep3_peak_495
chr1	166832613	166832961	349	166832818	70.75	17.0235	3.26119	13.9781	WT_rep3_peak_496
chr1	166906230	166907095	866	166906880	267.33	237.847	18.3459	233.91	WT_rep3_peak_497
chr1	166915422	166915603	182	166915536	127.58	76.2562	8.79085	72.7781	WT_rep3_peak_498
chr1	166915767	166916150	384	166916100	68.43	25.7859	4.74679	22.6367	WT_rep3_peak_499
chr1	167053759	167053988	230	167053844	131.63	78.7915	8.84229	75.3026	WT_rep3_peak_500
chr1	169761494	169761870	377	169761694	75.97	30.8968	5.26221	27.697	WT_rep3_peak_501
chr1	169994277	169994514	238	169994379	69.01	26.4981	4.78644	23.3411	WT_rep3_peak_502
chr1	170143192	170144571	1380	170143969	520.16	128.854	3.5942	125.184	WT_rep3_peak_503
chr1	170146010	170146321	312	170146201	367.07	153.34	5.84235	149.598	WT_rep3_peak_504
chr1	170496497	170496736	240	170496669	44.65	10.7979	3.12124	7.84597	WT_rep3_peak_505
chr1	170509555	170509899	345	170509704	257.47	208.013	15.2041	204.138	WT_rep3_peak_506
chr1	170537421	170537585	165	170537479	115.4	63.6046	7.75983	60.1886	WT_rep3_peak_507
chr1	171001195	171001344	150	171001246	62.05	17.0287	3.50266	13.9832	WT_rep3_peak_508
chr1	171045506	171045782	277	171045634	115.4	64.8078	7.95825	61.3834	WT_rep3_peak_509
chr1	171168614	171168866	253	171168719	50.45	14.1246	3.51771	11.1181	WT_rep3_peak_510
chr1	171169851	171170111	261	171169983	91.04	43.5819	6.29305	40.2843	WT_rep3_peak_511
chr1	171245563	171246220	658	171246001	242.39	203.306	16.2262	199.441	WT_rep3_peak_512
chr1	171291187	171291440	254	171291311	82.92	36.2845	5.73798	33.0401	WT_rep3_peak_513
chr1	171893952	171894265	314	171894147	114.82	62.6857	7.72117	59.2748	WT_rep3_peak_514
chr1	172022215	172022368	154	172022318	212.82	32.7643	2.57613	29.5508	WT_rep3_peak_515
chr1	172101623	172101796	174	172101684	2248.22	387.713	2.83277	383.54	WT_rep3_peak_516
chr1	172148883	172149321	439	172149013	165.85	78.505	6.6026	75.017	WT_rep3_peak_517
chr1	172150163	172150522	360	172150388	140.33	38.1001	3.71928	34.843	WT_rep3_peak_518
chr1	172153101	172153350	250	172153239	147.29	69.2142	6.44744	65.7704	WT_rep3_peak_519
chr1	172196817	172197477	661	172197138	161.79	54.0463	4.5219	50.6813	WT_rep3_peak_520
chr1	172197672	172198426	755	172197891	419.26	325.396	14.4917	321.314	WT_rep3_peak_521
chr1	172199019	172199626	608	172199486	821.12	980.12	39.1486	975.396	WT_rep3_peak_522
chr1	172199796	172199946	151	172199917	63.79	12.9053	2.86671	9.92202	WT_rep3_peak_523
chr1	172200286	172200703	418	172200483	114.82	19.8388	2.69343	16.7536	WT_rep3_peak_524
chr1	174330297	174330501	205	174330352	88.14	20.0994	3.14992	17.0128	WT_rep3_peak_525
chr1	174436047	174436686	640	174436350	306.18	187.435	9.59938	183.606	WT_rep3_peak_526
chr1	174663609	174663919	311	174663775	342.13	339.121	23.4605	335.02	WT_rep3_peak_527
chr1	174886855	174887081	227	174886984	55.67	17.127	3.87454	14.0756	WT_rep3_peak_528
chr1	176562624	176562989	366	176562702	41.75	9.25841	2.923	6.33707	WT_rep3_peak_529
chr1	176563209	176563555	347	176563298	104.38	43.967	5.5463	40.668	WT_rep3_peak_530
chr1	176577596	176577775	180	176577693	75.39	30.8968	5.22256	27.697	WT_rep3_peak_531
chr1	176582737	176583365	629	176583026	269.07	101.838	5.1936	98.2575	WT_rep3_peak_532
chr1	176583550	176584367	818	176584227	225	37.1559	2.69043	33.9062	WT_rep3_peak_533
chr1	176602132	176602464	333	176602319	74.81	11.4236	2.44534	8.46048	WT_rep3_peak_534
chr1	177274567	177276386	1820	177275533	5038.06	4374.28	18.9438	4368.32	WT_rep3_peak_535
chr1	177277375	177277726	352	177277518	233.11	66.7795	3.96804	63.346	WT_rep3_peak_536
chr1	177811806	177811958	153	177811868	63.79	22.3198	4.42961	19.2056	WT_rep3_peak_537
chr1	177812103	177812262	160	177812246	56.25	17.7508	3.91419	14.6903	WT_rep3_peak_538
chr1	177812969	177813244	276	177813101	64.37	7.1702	2.04273	4.3031	WT_rep3_peak_539
chr1	177815378	177815652	275	177815506	103.22	37.5255	4.73727	34.2742	WT_rep3_peak_540
chr1	177926254	177926412	159	177926313	64.37	23.0001	4.46926	19.8778	WT_rep3_peak_541
chr1	177931446	177931604	159	177931517	83.5	37.0754	5.77763	33.8259	WT_rep3_peak_542
chr1	177971138	177971326	189	177971268	52.77	15.3017	3.67631	12.2754	WT_rep3_peak_543
chr1	178076926	178077139	214	178077069	70.17	27.2164	4.86573	24.0517	WT_rep3_peak_544
chr1	178156833	178157070	238	178156963	165.27	39.5678	3.39322	36.2984	WT_rep3_peak_545
chr1	178157786	178157936	151	178157879	171.07	26.8235	2.56816	23.6648	WT_rep3_peak_546
chr1	178742550	178742725	176	178742687	54.51	16.5108	3.79525	13.4685	WT_rep3_peak_547
chr1	178759780	178760224	445	178759874	96.84	47.8022	6.68953	44.4753	WT_rep3_peak_548
chr1	179437584	179438134	551	179437915	541.61	614.99	33.5984	610.566	WT_rep3_peak_549
chr1	179452628	179453094	467	179452796	212.82	169.272	14.619	165.488	WT_rep3_peak_550
chr1	179580334	179580688	355	179580558	94.52	33.001	4.54864	29.7864	WT_rep3_peak_551
chr1	179581054	179581415	362	179581278	295.74	274.71	20.2887	270.708	WT_rep3_peak_552
chr1	179788474	179788648	175	179788600	238.33	34.5931	2.49306	31.3666	WT_rep3_peak_553
chr1	179971966	179972450	485	179972109	207.02	99.1026	6.71031	95.5322	WT_rep3_peak_554
chr1	179989518	179990023	506	179989830	221.52	49.6037	3.27231	46.2662	WT_rep3_peak_555
chr1	180160416	180161482	1067	180161097	187.3	140.055	12.8746	136.35	WT_rep3_peak_556
chr1	180264437	180265275	839	180264875	4800.3	6220.93	52.0749	6214.67	WT_rep3_peak_557
chr1	180574308	180574625	318	180574484	155.41	103.117	10.4273	99.5318	WT_rep3_peak_558
chr1	180579643	180579807	165	180579703	78.86	33.1733	5.46045	29.9546	WT_rep3_peak_559
chr1	180579957	180580106	150	180579961	38.85	7.80868	2.72476	4.91926	WT_rep3_peak_560
chr1	180690029	180690266	238	180690166	236.59	152.832	10.3302	149.092	WT_rep3_peak_561
chr1	180693615	180693835	221	180693702	86.98	39.4785	6.01552	36.2095	WT_rep3_peak_562
chr1	181004889	181005516	628	181005119	1540.76	1968.93	48.7898	1963.68	WT_rep3_peak_563
chr1	181008891	181009040	150	181009018	153.67	102.675	10.575	99.0906	WT_rep3_peak_564
chr1	181286768	181287934	1167	181287530	419.84	450.54	28.7733	446.289	WT_rep3_peak_565
chr1	181724079	181724228	150	181724215	47.55	12.4216	3.31948	9.44188	WT_rep3_peak_566
chr1	181730675	181731047	373	181730812	120.62	69.5159	8.31508	66.069	WT_rep3_peak_567
chr1	181732968	181733577	610	181733324	886.07	761.023	18.1034	756.472	WT_rep3_peak_568
chr1	181734002	181734151	150	181734094	99.74	50.388	6.88776	47.045	WT_rep3_peak_569
chr1	181749477	181750045	569	181749615	141.49	74.0507	7.38302	70.584	WT_rep3_peak_570
chr1	182103992	182104540	549	182104453	116.56	65.7421	8.03755	62.3139	WT_rep3_peak_571
chr1	182106553	182107119	567	182106687	152.51	101.621	10.4957	98.0412	WT_rep3_peak_572
chr1	182144158	182144826	669	182144590	287.62	135.534	6.71218	131.843	WT_rep3_peak_573
chr1	182275909	182276575	667	182276290	97.42	48.6597	6.72917	45.3284	WT_rep3_peak_574
chr1	182289255	182289437	183	182289295	47.55	12.4216	3.31948	9.44188	WT_rep3_peak_575
chr1	182317471	182318070	600	182317766	78.86	33.1733	5.46045	29.9546	WT_rep3_peak_576
chr1	182318258	182318440	183	182318368	114.82	63.8772	7.9186	60.458	WT_rep3_peak_577
chr1	182320160	182320869	710	182320764	823.44	1117.91	56.368	1113.1	WT_rep3_peak_578
chr1	182321162	182321405	244	182321257	49.87	13.5484	3.47807	10.5486	WT_rep3_peak_579
chr1	182722695	182723497	803	182723248	830.4	974.99	37.5349	970.27	WT_rep3_peak_580
chr1	182867977	182868181	205	182868122	129.31	78.2128	8.90979	74.7256	WT_rep3_peak_581
chr1	183103832	183104215	384	183103913	97.42	48.6597	6.72917	45.3284	WT_rep3_peak_582
chr1	183138720	183139279	560	183138779	265.01	75.6495	3.97027	72.1743	WT_rep3_peak_583
chr1	183139654	183140138	485	183139781	60.89	11.3807	2.72036	8.418	WT_rep3_peak_584
chr1	183140340	183140489	150	183140350	70.75	17.0235	3.26119	13.9781	WT_rep3_peak_585
chr1	184629747	184629898	152	184629757	36.53	6.89518	2.56617	4.0308	WT_rep3_peak_586
chr1	184630583	184631079	497	184630826	202.38	157.424	13.9054	153.671	WT_rep3_peak_587
chr1	185088667	185089113	447	185088832	63.79	22.3198	4.42961	19.2056	WT_rep3_peak_588
chr1	185139650	185139938	289	185139791	139.17	29.9929	3.11495	26.805	WT_rep3_peak_589
chr1	185196558	185197148	591	185196696	169.33	119.9	11.6455	116.257	WT_rep3_peak_590
chr1	186356643	186357854	1212	186357002	604.82	741.619	41.4209	737.084	WT_rep3_peak_591
chr1	186958091	186958308	218	186958226	291.68	136.343	6.65189	132.65	WT_rep3_peak_592
chr1	187082088	187082237	150	187082091	57.41	18.3821	3.99349	15.3128	WT_rep3_peak_593
chr1	187943234	187943442	209	187943331	73.65	29.4072	5.10362	26.2221	WT_rep3_peak_594
chr1	187943806	187944054	249	187943906	169.33	119.9	11.6455	116.257	WT_rep3_peak_595
chr1	187944669	187944818	150	187944707	42.33	9.76189	2.96265	6.8289	WT_rep3_peak_596
chr1	188704372	188704778	407	188704639	347.35	205.291	9.16716	201.422	WT_rep3_peak_597
chr1	188941922	188942142	221	188942030	82.92	36.2845	5.73798	33.0401	WT_rep3_peak_598
chr1	189075376	189075592	217	189075464	187.88	95.4137	7.26474	91.8566	WT_rep3_peak_599
chr1	189854762	189855004	243	189854910	53.93	13.1415	3.23115	10.1502	WT_rep3_peak_600
chr1	189892805	189893602	798	189892871	212.24	91.2399	5.92329	87.7012	WT_rep3_peak_601
chr1	189893761	189894532	772	189894117	227.32	119.277	7.61052	115.637	WT_rep3_peak_602
chr1	190505173	190505819	647	190505674	216.88	125.204	8.71511	121.545	WT_rep3_peak_603
chr1	190532079	190532348	270	190532221	53.35	15.4258	3.62331	12.3982	WT_rep3_peak_604
chr1	190757310	190757459	150	190757409	48.71	12.9807	3.39877	9.99094	WT_rep3_peak_605
chr1	191084898	191085200	303	191085053	52.19	12.61	3.12881	9.62872	WT_rep3_peak_606
chr1	191510581	191510948	368	191510875	294.58	210.359	12.3159	206.478	WT_rep3_peak_607
chr1	191640879	191641941	1063	191641698	278.93	252.185	19.1389	248.221	WT_rep3_peak_608
chr1	191784915	191785354	440	191785234	52.19	15.3017	3.63666	12.2754	WT_rep3_peak_609
chr1	192188238	192189323	1086	192188409	410.56	371.441	19.5981	367.294	WT_rep3_peak_610
chr1	192528572	192529119	548	192529010	63.79	22.3198	4.42961	19.2056	WT_rep3_peak_611
chr1	192579303	192579859	557	192579715	255.15	205.599	15.0677	201.729	WT_rep3_peak_612
chr1	192612876	192613175	300	192613024	133.37	82.1656	9.18733	78.6613	WT_rep3_peak_613
chr1	192666048	192666677	630	192666349	146.13	95.3609	10.0596	91.8039	WT_rep3_peak_614
chr1	192856729	192856880	152	192856790	100.32	51.2586	6.92741	47.9099	WT_rep3_peak_615
chr1	194325866	194326761	896	194326152	89.3	28.1789	4.10466	25.0052	WT_rep3_peak_616
chr1	194494308	194495596	1289	194494688	402.44	373.063	20.5837	368.913	WT_rep3_peak_617
chr1	194496230	194497024	795	194496546	136.27	85.1642	9.38556	81.6477	WT_rep3_peak_618
chr1	194712349	194712508	160	194712449	63.21	16.4434	3.37935	13.4044	WT_rep3_peak_619
chr1	194718385	194718670	286	194718531	181.5	66.1133	4.93256	62.6838	WT_rep3_peak_620
chr1	194779209	194779681	473	194779544	117.72	66.6801	8.11684	63.2469	WT_rep3_peak_621
chr1	194780754	194780992	239	194780902	99.74	50.388	6.88776	47.045	WT_rep3_peak_622
chr10	3907831	3908083	253	3907973	119.46	68.567	8.23578	65.1252	WT_rep3_peak_623
chr10	3913449	3914256	808	3913550	95.1	46.949	6.57058	43.6283	WT_rep3_peak_624
chr10	4306535	4306789	255	4306677	138.59	87.179	9.54415	83.6549	WT_rep3_peak_625
chr10	4318313	4318820	508	4318636	105.54	55.6748	7.28424	52.3006	WT_rep3_peak_626
chr10	4377301	4377454	154	4377355	55.67	17.127	3.87454	14.0756	WT_rep3_peak_627
chr10	4403660	4403997	338	4403795	52.19	15.3017	3.63666	12.2754	WT_rep3_peak_628
chr10	4970493	4970930	438	4970811	92.78	44.4168	6.41199	41.1129	WT_rep3_peak_629
chr10	4971101	4972213	1113	4971638	1045.54	1235.59	38.6176	1230.7	WT_rep3_peak_630
chr10	5178813	5179020	208	5178957	179.76	58.1196	4.40353	54.7323	WT_rep3_peak_631
chr10	5179443	5179718	276	5179574	88.14	22.1301	3.38303	19.0212	WT_rep3_peak_632
chr10	5218446	5218603	158	5218519	41.75	7.32449	2.51481	4.45579	WT_rep3_peak_633
chr10	5287104	5287253	150	5287124	92.2	17.8022	2.8243	14.7414	WT_rep3_peak_634
chr10	5288834	5289193	360	5289075	236.01	85.0654	4.91221	81.5509	WT_rep3_peak_635
chr10	5782176	5782390	215	5782268	222.68	134.674	9.31985	130.986	WT_rep3_peak_636
chr10	5782828	5783194	367	5782957	118.3	60.3426	7.01746	56.9423	WT_rep3_peak_637
chr10	6839859	6840270	412	6840008	122.36	71.4243	8.43402	67.9677	WT_rep3_peak_638
chr10	7499354	7499708	355	7499628	255.15	132.466	7.53383	128.784	WT_rep3_peak_639
chr10	7577833	7578837	1005	7578706	245.29	176.572	12.3146	172.769	WT_rep3_peak_640
chr10	7581158	7581758	601	7581320	173.39	124.31	11.923	120.654	WT_rep3_peak_641
chr10	7586115	7586264	150	7586233	46.97	11.8714	3.27983	8.89882	WT_rep3_peak_642
chr10	7588319	7588774	456	7588630	182.08	134.378	12.5177	130.691	WT_rep3_peak_643
chr10	7696678	7697030	353	7696821	148.45	37.9438	3.55836	34.6875	WT_rep3_peak_644
chr10	7781751	7782162	412	7782074	60.89	10.4298	2.57867	7.48778	WT_rep3_peak_645
chr10	7782697	7783214	518	7782839	149.61	82.2283	7.92688	78.7238	WT_rep3_peak_646
chr10	7787227	7787408	182	7787312	105.54	55.6748	7.28424	52.3006	WT_rep3_peak_647
chr10	7794935	7796367	1433	7795946	516.68	551.327	28.7599	546.968	WT_rep3_peak_648
chr10	8083205	8083379	175	8083240	115.4	24.5238	3.06309	21.387	WT_rep3_peak_649
chr10	8600665	8601492	828	8601151	241.81	204.751	16.6014	200.882	WT_rep3_peak_650
chr10	8605400	8605996	597	8605509	144.97	49.0179	4.56161	45.6855	WT_rep3_peak_651
chr10	9485766	9485915	150	9485806	62.63	12.9464	2.89217	9.96287	WT_rep3_peak_652
[truncated: 8,962 more rows]
