# Supplementary material for: Single-cell discovery of m6A RNA modifications in the hippocampus
Source: Genome Res. 2024 Jun;34(6):822–36. doi: 10.1101/gr.278424.123 (PMC11293556; doi:10.1101/gr.278424.123)
Supplement: Supplement 17 [file Supplemental_Table_S7.xlsx]

## Sheet: Supplemental_Table_S7
m6A sites in bulk seq and m6A-RIP
chr	start	end	strand	peak_score	focus_ratio_region_size	annotation	chr	start	end	peak_id	fold_enrichment	‘=-LOG10(pvalue)	‘=-LOG10(qvalue)
chr4	131931865	131931866	-	56	NA	exon (NM_145393.4, exon 4 of 5)	chr4	131931444	131932414	WT_rep1_peak_6373	27.7197	580.883	576.489
chr4	131931889	131931890	-	49	NA	exon (NM_145393.4, exon 4 of 5)	chr4	131931444	131932414	WT_rep1_peak_6373	27.7197	580.883	576.489
chr4	131931997	131931998	+	44	NA	exon (NM_145393.4, exon 4 of 5)	chr4	131931444	131932414	WT_rep1_peak_6373	27.7197	580.883	576.489
chr13	108184284	108184285	+	32	NA	exon (NM_001048250.2, exon 3 of 3)	chr13	108183989	108184602	WT_rep1_peak_2479	21.5698	266.285	262.292
chr7	109335280	109335281	-	25	NA	exon (NM_020050.1, exon 5 of 5)	chr7	109335052	109335408	WT_rep1_peak_8097	11.2555	100.986	97.4004
chr10	34175293	34175294	+	20	NA	exon (NM_030203.2, exon 1 of 1)	chr10	34174787	34175397	WT_rep1_peak_733	46.3489	3495.65	3489.88
chr4	58437234	58437235	-	19	NA	exon (NM_001290486.1, exon 3 of 3)	chr4	58436993	58437376	WT_rep1_peak_6141	15.1652	183.692	179.868
chrX	151395410	151395411	-	17	NA	exon (NM_001290684.1, exon 10 of 10)	chrX	151395389	151395740	WT_rep1_peak_9575	19.0907	523.153	518.819
chr19	5131839	5131840	-	17	NA	exon (NM_001001885.2, exon 2 of 2)	chr19	5131102	5131899	WT_rep1_peak_4403	8.82051	205.661	201.787
chr6	126712986	126712987	-	15	NA	exon (NM_013568.6, exon 1 of 2)	chr6	126712387	126712987	WT_rep1_peak_7552	12.1193	113.117	109.489
chr5	148442809	148442810	-	15	NA	exon (NM_001359199.1, exon 7 of 7)	chr5	148442570	148442954	WT_rep1_peak_7150	28.701	3527.06	3521.28
chr19	44291745	44291746	+	14	NA	exon (NM_009128.2, exon 6 of 6)	chr19	44291446	44291959	WT_rep1_peak_4569	10.4779	1957.79	1952.54
chr13	74179594	74179595	+	13	NA	exon (NM_182839.2, exon 4 of 4)	chr13	74179267	74180413	WT_rep1_peak_2384	9.63083	709.266	704.757
chr6	107546444	107546445	+	13	NA	exon (NM_008516.4, exon 2 of 2)	chr6	107544124	107546771	WT_rep1_peak_7456	45.8433	1211	1206.12
chr2	127476836	127476837	-	13	NA	exon (NM_001171187.1, exon 3 of 3)	chr2	127476672	127477051	WT_rep1_peak_5148	6.0535	112.703	109.076
chr10	80451257	80451258	+	12	NA	exon (NM_019575.4, exon 7 of 7)	chr10	80451198	80451467	WT_rep1_peak_891	4.44702	20.3375	17.2345
chr3	81862125	81862126	+	12	NA	exon (NM_177662.3, exon 8 of 8)	chr3	81861532	81862182	WT_rep1_peak_5640	5.3616	29.0663	25.8712
chr14	63380126	63380127	+	12	NA	exon (NM_007798.3, exon 10 of 10)	chr14	63379929	63380471	WT_rep1_peak_2715	6.95982	822.744	818.14
chr14	63380165	63380166	+	12	NA	exon (NM_007798.3, exon 10 of 10)	chr14	63379929	63380471	WT_rep1_peak_2715	6.95982	822.744	818.14
chr5	148442613	148442614	-	11	NA	exon (NM_001359199.1, exon 7 of 7)	chr5	148442570	148442954	WT_rep1_peak_7150	28.701	3527.06	3521.28
chr14	93252895	93252896	-	11	NA	exon (NM_001081377.3, exon 5 of 5)	chr14	93252627	93253045	WT_rep1_peak_2790	5.24791	28.7401	25.5509
chr15	27593751	27593752	+	10	NA	exon (NM_020332.4, exon 12 of 12)	chr15	27593379	27593967	WT_rep1_peak_2908	6.84874	146.953	143.222
chr3	88636827	88636828	+	10	NA	exon (NM_001163310.1, exon 5 of 5)	chr3	88636427	88636961	WT_rep1_peak_5681	3.74001	28.7483	25.5591
chr10	88203671	88203672	-	10	NA	exon (NR_168606.1, exon 3 of 3)	chr10	88203430	88203766	WT_rep1_peak_940	5.61564	31.3948	28.181
chr10	34174999	34175000	+	10	NA	exon (NM_030203.2, exon 1 of 1)	chr10	34174787	34175397	WT_rep1_peak_733	46.3489	3495.65	3489.88
chr13	24997031	24997032	+	10	NA	TTS (NM_024473.3) NA NA NA chr13	24996578	24997204	WT_rep1_peak_2185	9261	930.883	926.199	418
chr10	88203659	88203660	-	10	NA	exon (NR_168606.1, exon 3 of 3)	chr10	88203430	88203766	WT_rep1_peak_940	5.61564	31.3948	28.181
chr8	41446208	41446209	-	10	NA	exon (NM_001005863.2, exon 14 of 14)	chr8	41445906	41446455	WT_rep1_peak_8413	11.0523	97.7387	94.1649
chr10	80451386	80451387	+	9	NA	exon (NM_019575.4, exon 7 of 7)	chr10	80451198	80451467	WT_rep1_peak_891	4.44702	20.3375	17.2345
chr4	131931622	131931623	-	9	NA	exon (NM_145393.4, exon 4 of 5)	chr4	131931444	131932414	WT_rep1_peak_6373	27.7197	580.883	576.489
chr16	43439147	43439148	+	9	NA	exon (NM_001285805.1, exon 11 of 11)	chr16	43438898	43440230	WT_rep1_peak_3452	20.5719	805.887	801.295
chr3	88636806	88636807	+	9	NA	exon (NM_001163310.1, exon 5 of 5)	chr3	88636427	88636961	WT_rep1_peak_5681	3.74001	28.7483	25.5591
chr2	124507573	124507574	+	9	NA	exon (NM_001290997.1, exon 21 of 21)	chr2	124506036	124507873	WT_rep1_peak_5133	46.4157	765.804	761.246
chr6	107546422	107546423	+	9	NA	exon (NM_008516.4, exon 2 of 2)	chr6	107544124	107546771	WT_rep1_peak_7456	45.8433	1211	1206.12
chr14	93252649	93252650	-	9	NA	exon (NM_001081377.3, exon 5 of 5)	chr14	93252627	93253045	WT_rep1_peak_2790	5.24791	28.7401	25.5509
chr5	81943037	81943038	+	9	NA	exon (NM_001347367.2, exon 28 of 28)	chr5	81942106	81943547	WT_rep1_peak_6793	33.642	671.59	667.113
chr11	3594899	3594900	-	9	NA	exon (NR_002321.2, exon 3 of 4)	chr11	3594842	3595611	WT_rep1_peak_1086	18.848	318.896	314.815
chr10	34175123	34175124	+	9	NA	exon (NM_030203.2, exon 1 of 1)	chr10	34174787	34175397	WT_rep1_peak_733	46.3489	3495.65	3489.88
chr7	6710315	6710316	-	9	NA	exon (NM_008817.2, exon 9 of 9)	chr7	6710123	6710653	WT_rep1_peak_7640	6.22658	359.808	355.667
chr14	63380157	63380158	+	9	NA	exon (NM_007798.3, exon 10 of 10)	chr14	63379929	63380471	WT_rep1_peak_2715	6.95982	822.744	818.14
chr6	32769564	32769565	-	9	NA	exon (NM_001355667.1, exon 9 of 9)	chr6	32769330	32769762	WT_rep1_peak_7242	5.95573	55.257	51.8794
chr6	126714372	126714373	-	9	NA	exon (NM_013568.6, exon 1 of 2)	chr6	126714227	126715640	WT_rep1_peak_7553	25.4934	390.381	386.199
chr17	34831888	34831889	+	9	NA	exon (NM_001163379.1, exon 7 of 7)	chr17	34831541	34831908	WT_rep1_peak_3798	2.12967	9.71904	6.77775
chr1	155927544	155927545	+	9	NA	exon (NM_001160180.1, exon 3 of 3)	chr1	155927062	155927613	WT_rep1_peak_457	19.1664	392.617	388.431
chr2	69626053	69626054	+	9	NA	exon (NM_028521.2, exon 4 of 4)	chr2	69625852	69626431	WT_rep1_peak_4924	10.849	95.5892	92.0235
chr3	84072319	84072320	-	9	NA	exon (NM_001271725.1, exon 12 of 12)	chr3	84071891	84072524	WT_rep1_peak_5649	29.4646	675.556	671.075
chr2	18848972	18848973	-	9	NA	exon (NM_001355146.1, exon 9 of 9)	chr2	18848643	18849296	WT_rep1_peak_4713	14.3549	146.652	142.922
chr6	25668921	25668922	-	8	NA	exon (NM_010338.2, exon 2 of 2)	chr6	25668703	25669824	WT_rep1_peak_7207	14.4992	830.473	825.863
chr2	18848984	18848985	-	8	NA	exon (NM_001355146.1, exon 9 of 9)	chr2	18848643	18849296	WT_rep1_peak_4713	14.3549	146.652	142.922
chr2	180623417	180623418	+	8	NA	exon (NM_001177706.2, exon 12 of 12)	chr2	180622826	180623955	WT_rep1_peak_5430	5.63077	89.4646	85.9229
chr11	3597068	3597069	-	8	NA	exon (NR_002321.2, exon 2 of 4)	chr11	3596525	3597098	WT_rep1_peak_1087	24.5676	320.795	316.711
chr9	45773446	45773447	+	8	NA	exon (NM_001145947.2, exon 8 of 8)	chr9	45773042	45773528	WT_rep1_peak_8939	4.62151	59.5822	56.1797
chr11	115136186	115136187	+	8	NA	exon (NM_001033393.2, exon 10 of 10)	chr11	115135916	115136377	WT_rep1_peak_1654	7.59722	53.6206	50.2501
chr6	107546545	107546546	+	8	NA	exon (NM_008516.4, exon 2 of 2)	chr6	107544124	107546771	WT_rep1_peak_7456	45.8433	1211	1206.12
chr1	153783938	153783939	+	8	NA	exon (NM_008131.4, exon 7 of 7)	chr1	153783705	153784028	WT_rep1_peak_437	10.0968	1769.13	1763.96
chr17	12438072	12438073	+	8	NA	exon (NM_026644.2, exon 9 of 9)	chr17	12437958	12438256	WT_rep1_peak_3628	6.87916	154.689	150.937
chr15	12834092	12834093	+	8	NA	exon (NM_001130149.1, exon 4 of 35)	chr15	12834050	12834200	WT_rep1_peak_2892	5.43989	49.9393	46.5934
chr8	26471878	26471879	-	8	NA	exon (NM_029037.4, exon 5 of 5)	chr8	26471862	26472014	WT_rep1_peak_8376	5.25998	27.5449	24.3638
chr11	76670591	76670592	-	8	NA	exon (NM_007754.2, exon 21 of 21)	chr11	76670220	76670999	WT_rep1_peak_1411	10.4177	128.488	124.81
chr5	67212913	67212914	+	8	NA	exon (NM_001001980.3, exon 26 of 26)	chr5	67212717	67213476	WT_rep1_peak_6767	14.2461	166.929	163.146
chr18	36816130	36816131	+	8	NA	exon (NM_001083317.1, exon 4 of 4)	chr18	36816038	36816188	WT_rep1_peak_4133	4.26799	21.7265	18.6077
chr17	5803814	5803815	+	8	NA	exon (NM_146073.3, exon 9 of 9)	chr17	5803063	5803966	WT_rep1_peak_3603	35.7546	582.749	578.353
chr8	70160166	70160167	-	8	NA	exon (NM_001039965.1, exon 5 of 5)	chr8	70159675	70160296	WT_rep1_peak_8473	9.98527	83.9924	80.4728
chr6	72543351	72543352	-	8	NA	exon (NM_001253692.1, exon 12 of 12)	chr6	72543046	72543528	WT_rep1_peak_7356	7.44479	51.794	48.4339
chr11	101864291	101864292	-	8	NA	exon (NM_028207.3, exon 3 of 3)	chr11	101864055	101864791	WT_rep1_peak_1579	29.6981	3078.87	3073.21
chr4	115855482	115855483	-	8	NA	exon (NM_010173.5, exon 15 of 15)	chr4	115855203	115855607	WT_rep1_peak_6261	3.66671	45.1786	41.8607
chr4	49586724	49586725	-	8	NA	exon (NM_001355503.1, exon 2 of 2)	chr4	49585453	49586760	WT_rep1_peak_6118	20.8724	330.951	326.851
chrX	72987514	72987515	-	8	NA	exon (NM_008224.4, exon 26 of 26)	chrX	72987511	72988004	WT_rep1_peak_9446	7.9262	144.187	140.463
chr4	118994293	118994294	+	8	NA	exon (NM_011400.3, exon 10 of 10)	chr4	118993569	118994491	WT_rep1_peak_6273	6.66653	130.548	126.864
chr14	63380342	63380343	+	8	NA	exon (NM_007798.3, exon 10 of 10)	chr14	63379929	63380471	WT_rep1_peak_2715	6.95982	822.744	818.14
chr11	76670871	76670872	-	8	NA	exon (NM_007754.2, exon 21 of 21)	chr11	76670220	76670999	WT_rep1_peak_1411	10.4177	128.488	124.81
chr2	121268219	121268220	+	8	NA	exon (NM_007952.2, exon 13 of 13)	chr2	121268007	121268336	WT_rep1_peak_5125	7.6135	142.632	138.912
chr12	85390076	85390077	-	8	NA	exon (NM_026775.4, exon 5 of 5)	chr12	85389815	85390273	WT_rep1_peak_1962	30.3783	659.604	655.136
chr13	112641528	112641529	+	8	NA	exon (NM_010560.3, exon 17 of 17)	chr13	112640642	112642188	WT_rep1_peak_2491	28.3275	390.722	386.539
chr14	61201704	61201705	-	7	NA	exon (NM_001164155.1, exon 10 of 10)	chr14	61201481	61202184	WT_rep1_peak_2694	16.184	175.912	172.107
chr15	72680372	72680373	-	7	NA	exon (NR_002864.2, exon 1 of 1)	chr15	72678304	72681373	WT_rep1_peak_3011	49.0728	2477.69	2472.26
chr2	18848954	18848955	-	7	NA	exon (NM_001355146.1, exon 9 of 9)	chr2	18848643	18849296	WT_rep1_peak_4713	14.3549	146.652	142.922
chr5	115472359	115472360	-	7	NA	exon (NM_029645.3, exon 3 of 3)	chr5	115472310	115472523	WT_rep1_peak_6938	3.83731	15.106	12.0697
chr5	105633795	105633796	+	7	NA	exon (NM_001033550.3, exon 5 of 5)	chr5	105633650	105634163	WT_rep1_peak_6863	27.0561	589.252	584.849
chr18	36421548	36421549	+	7	NA	exon (NM_008989.4, exon 2 of 2)	chr18	36420397	36421581	WT_rep1_peak_4125	19.5852	4231.47	4225.56
chr5	148442833	148442834	-	7	NA	exon (NM_001359199.1, exon 7 of 7)	chr5	148442570	148442954	WT_rep1_peak_7150	28.701	3527.06	3521.28
chr1	172197885	172197886	+	7	NA	exon (NM_001039484.1, exon 2 of 2)	chr1	172197671	172198401	WT_rep1_peak_533	22.5057	480.5	476.21
chr2	84432590	84432591	-	7	NA	exon (NM_001085448.1, exon 18 of 18)	chr2	84432447	84433168	WT_rep1_peak_4974	25.8378	343.776	339.657
chr4	106519783	106519784	-	7	NA	exon (NM_001172073.1, exon 10 of 10)	chr4	106519546	106520188	WT_rep1_peak_6232	9.68041	79.8741	76.3721
chr1	172199559	172199560	+	7	NA	exon (NM_001039484.1, exon 2 of 2)	chr1	172199037	172199626	WT_rep1_peak_534	35.8361	1152.66	1147.82
chr14	61604595	61604596	-	7	NA	exon (NM_008466.5, exon 17 of 17)	chr14	61604458	61604749	WT_rep1_peak_2707	17.1494	190.999	187.157
chr10	34175090	34175091	+	7	NA	exon (NM_030203.2, exon 1 of 1)	chr10	34174787	34175397	WT_rep1_peak_733	46.3489	3495.65	3489.88
chr14	84771132	84771133	+	7	NA	exon (NM_001013753.2, exon 4 of 4)	chr14	84770287	84771599	WT_rep1_peak_2787	55.7139	974.886	970.17
chr12	117720394	117720395	+	7	NA	exon (NM_001373989.1, exon 26 of 26)	chr12	117719824	117720663	WT_rep1_peak_2098	29.4803	848.75	844.127
chr4	57710366	57710367	+	7	NA	exon (NM_001384149.1, exon 7 of 7)	chr4	57709485	57710616	WT_rep1_peak_6136	12.3733	116.485	112.845
chr14	93253043	93253044	-	7	NA	exon (NM_001081377.3, exon 5 of 5)	chr14	93252627	93253045	WT_rep1_peak_2790	5.24791	28.7401	25.5509
chr6	107546547	107546548	+	7	NA	exon (NM_008516.4, exon 2 of 2)	chr6	107544124	107546771	WT_rep1_peak_7456	45.8433	1211	1206.12
chr4	47470129	47470130	-	7	NA	exon (NM_001355496.1, exon 2 of 2)	chr4	47469985	47470741	WT_rep1_peak_6110	18.4626	354.051	349.919
chr10	88203735	88203736	-	7	NA	exon (NR_168606.1, exon 3 of 3)	chr10	88203430	88203766	WT_rep1_peak_940	5.61564	31.3948	28.181
chr4	59772079	59772080	-	7	NA	exon (NM_001013577.1, exon 5 of 5)	chr4	59771868	59772395	WT_rep1_peak_6148	12.1701	114.237	110.605
chr8	120235230	120235231	-	7	NA	exon (NM_001167910.1, exon 23 of 23)	chr8	120235030	120235437	WT_rep1_peak_8685	7.81409	148.933	145.196
chr3	84072198	84072199	-	7	NA	exon (NM_001271725.1, exon 12 of 12)	chr3	84071891	84072524	WT_rep1_peak_5649	29.4646	675.556	671.075
chr5	67779686	67779687	-	7	NA	exon (NM_001038999.2, exon 37 of 37)	chr5	67779391	67779843	WT_rep1_peak_6770	22.8059	548.762	544.401
chr4	149732963	149732964	+	7	NA	exon (NM_001290989.1, exon 18 of 18)	chr4	149732789	149733224	WT_rep1_peak_6484	5.63964	418.866	414.648
chr5	115472361	115472362	-	7	NA	exon (NM_029645.3, exon 3 of 3)	chr5	115472310	115472523	WT_rep1_peak_6938	3.83731	15.106	12.0697
chr10	94422912	94422913	+	7	NA	exon (NM_001168684.1, exon 4 of 4)	chr10	94422671	94423256	WT_rep1_peak_960	11.2555	100.986	97.4004
chr3	84072033	84072034	-	7	NA	exon (NM_001271725.1, exon 12 of 12)	chr3	84071891	84072524	WT_rep1_peak_5649	29.4646	675.556	671.075
chr11	76670944	76670945	-	7	NA	exon (NM_007754.2, exon 21 of 21)	chr11	76670220	76670999	WT_rep1_peak_1411	10.4177	128.488	124.81
chr8	71945700	71945701	+	6	NA	exon (NM_032544.4, exon 9 of 9)	chr8	71945633	71945783	WT_rep1_peak_8498	3.99137	22.9496	19.8192
chr7	61999406	61999407	+	6	NA	exon (NM_010882.3, exon 1 of 1)	chr7	61999345	61999650	WT_rep1_peak_7902	29.6277	605.392	600.973
chr2	16756194	16756195	+	6	NA	exon (NM_026162.6, exon 14 of 14)	chr2	16755921	16756833	WT_rep1_peak_4705	22.1288	275.904	271.893
chr8	13306470	13306471	-	6	NA	exon (NM_001024504.2, exon 7 of 7)	chr8	13306245	13306916	WT_rep1_peak_8305	111.17	2386.22	2380.82
chr14	63380367	63380368	+	6	NA	exon (NM_007798.3, exon 10 of 10)	chr14	63379929	63380471	WT_rep1_peak_2715	6.95982	822.744	818.14
chr14	103941486	103941487	+	6	NA	exon (NM_001361639.1, exon 8 of 8)	chr14	103941217	103941610	WT_rep1_peak_2813	10.8401	283.233	279.211
chr10	110780116	110780117	-	6	NA	exon (NM_001359622.1, exon 17 of 17)	chr10	110779943	110780303	WT_rep1_peak_999	103.068	2154.85	2149.53
chr18	36896560	36896561	+	6	NA	exon (NM_026464.3, exon 7 of 7)	chr18	36896274	36896704	WT_rep1_peak_4134	7.85126	56.3935	53.008
chr10	34159680	34159681	+	6	NA	exon (NM_009433.3, exon 1 of 1)	chr10	34158549	34160201	WT_rep1_peak_732	9.57526	734.314	729.784
chr4	131931587	131931588	-	6	NA	exon (NM_145393.4, exon 4 of 5)	chr4	131931444	131932414	WT_rep1_peak_6373	27.7197	580.883	576.489
chrX	158272348	158272349	-	6	NA	exon (NM_001081124.2, exon 11 of 17)	chrX	158272143	158272455	WT_rep1_peak_9583	4.5243	141.815	138.098
chr9	103924534	103924535	-	6	NA	exon (NM_025692.3, exon 12 of 12)	chr9	103924247	103924916	WT_rep1_peak_9201	18.7753	218.072	214.171
chr12	85390111	85390112	-	6	NA	exon (NM_026775.4, exon 5 of 5)	chr12	85389815	85390273	WT_rep1_peak_1962	30.3783	659.604	655.136
chr15	27593700	27593701	+	6	NA	exon (NM_020332.4, exon 12 of 12)	chr15	27593379	27593967	WT_rep1_peak_2908	6.84874	146.953	143.222
chr10	88203433	88203434	-	6	NA	exon (NR_168606.1, exon 3 of 3)	chr10	88203430	88203766	WT_rep1_peak_940	5.61564	31.3948	28.181
chr17	35992759	35992760	-	6	NA	exon (NM_001198831.1, exon 18 of 18)	chr17	35992584	35993061	WT_rep1_peak_3811	10.2268	86.7671	83.2372
chr10	80451349	80451350	+	6	NA	exon (NM_019575.4, exon 7 of 7)	chr10	80451198	80451467	WT_rep1_peak_891	4.44702	20.3375	17.2345
chr18	58077304	58077305	+	6	NA	exon (NM_009194.3, exon 27 of 27)	chr18	58077055	58077391	WT_rep1_peak_4255	4.43218	21.9793	18.8593
chr12	26528331	26528332	+	6	NA	exon (NM_020557.4, exon 5 of 5)	chr12	26528202	26528655	WT_rep1_peak_1760	8.66422	65.9077	62.4706
chr5	92202468	92202469	-	6	NA	exon (NM_001080794.2, exon 12 of 12)	chr5	92201982	92202903	WT_rep1_peak_6820	9.4688	393.893	389.706
chr4	58437229	58437230	-	6	NA	exon (NM_001290486.1, exon 3 of 3)	chr4	58436993	58437376	WT_rep1_peak_6141	15.1652	183.692	179.868
chr8	125070747	125070748	+	6	NA	exon (NM_139272.2, exon 16 of 16)	chr8	125070655	125070961	WT_rep1_peak_8746	11.1031	98.818	95.2407
chr11	101864746	101864747	-	6	NA	exon (NM_028207.3, exon 3 of 3)	chr11	101864055	101864791	WT_rep1_peak_1579	29.6981	3078.87	3073.21
chr6	148082993	148082994	-	6	NA	exon (NM_001286560.1, exon 13 of 13)	chr6	148082778	148083247	WT_rep1_peak_7602	24.8497	425.115	420.888
chr18	40339210	40339211	-	6	NA	exon (NM_023311.3, exon 6 of 6)	chr18	40339072	40339364	WT_rep1_peak_4210	17.0986	189.731	185.892
chr13	74179583	74179584	+	6	NA	exon (NM_182839.2, exon 4 of 4)	chr13	74179267	74180413	WT_rep1_peak_2384	9.63083	709.266	704.757
chr6	136807785	136807786	-	6	NA	exon (NM_001039558.2, exon 2 of 2)	chr6	136807705	136807922	WT_rep1_peak_7581	4.8535	23.8549	20.7118
chr5	149540869	149540870	-	6	NA	exon (NM_001347534.1, exon 17 of 17)	chr5	149540849	149541238	WT_rep1_peak_7155	6.58003	131.904	128.216
chr8	26473294	26473295	-	6	NA	exon (NM_029037.4, exon 5 of 5)	chr8	26472991	26473685	WT_rep1_peak_8378	9.31782	75.4939	72.0124
chr3	88636899	88636900	+	6	NA	exon (NM_001163310.1, exon 5 of 5)	chr3	88636427	88636961	WT_rep1_peak_5681	3.74001	28.7483	25.5591
chr13	23924034	23924035	+	6	NA	TTS (NM_015786.3) NA NA NA chr13	23923821	23924090	WT_rep1_peak_2182	784	81.9265	78.4154	138
chrX	151393828	151393829	-	6	NA	exon (NM_001290684.1, exon 10 of 10)	chrX	151393728	151394358	WT_rep1_peak_9574	8.46098	63.9727	60.5453
chr16	38346050	38346051	-	6	NA	exon (NM_001300827.1, exon 11 of 11)	chr16	38345799	38346078	WT_rep1_peak_3419	7.80046	55.4649	52.084
chr5	105961879	105961880	+	6	NA	exon (NM_001122768.1, exon 3 of 3)	chr5	105961449	105962303	WT_rep1_peak_6867	19.9439	237.897	233.955
chr19	15883344	15883345	-	6	NA	exon (NM_001205339.1, exon 9 of 9)	chr19	15883336	15883512	WT_rep1_peak_4472	5.00156	32.9592	29.7344
chr8	66921206	66921207	+	6	NA	exon (NM_001166372.1, exon 8 of 8)	chr8	66920894	66921565	WT_rep1_peak_8456	20.1472	241.908	237.959
chr19	23143051	23143052	+	6	NA	exon (NM_010638.5, exon 2 of 2)	chr19	23142074	23143203	WT_rep1_peak_4485	34.9381	1006.72	1001.98
chr11	120501241	120501242	-	6	NA	exon (NM_001347615.2, exon 13 of 13)	chr11	120500923	120501411	WT_rep1_peak_1701	10.9261	153.239	149.49
chr2	28120055	28120056	+	6	NA	exon (NM_001038613.1, exon 6 of 6)	chr2	28119102	28120657	WT_rep1_peak_4775	17.4866	2602.11	2596.63
chr7	79999872	79999873	-	6	NA	exon (NM_172903.4, exon 24 of 24)	chr7	79999747	80000536	WT_rep1_peak_7975	4.29765	72.4926	69.0244
chr11	70901100	70901101	-	6	NA	exon (NM_001291146.1, exon 7 of 7)	chr11	70900803	70901186	WT_rep1_peak_1370	7.69884	54.5406	51.1655
chr15	44503977	44503978	+	6	NA	exon (NM_001357690.1, exon 7 of 7)	chr15	44503557	44504079	WT_rep1_peak_2963	4.07521	49.8871	46.5414
chr4	147959741	147959742	-	6	NA	exon (NM_001285920.1, exon 20 of 20)	chr4	147959148	147959924	WT_rep1_peak_6468	19.285	617.695	613.265
chr2	151951427	151951428	+	6	NA	exon (NM_029688.5, exon 2 of 2)	chr2	151951109	151951887	WT_rep1_peak_5240	8.84486	282.956	278.934
chr5	127673576	127673577	-	6	NA	exon (NM_133895.1, exon 8 of 8)	chr5	127673454	127673710	WT_rep1_peak_7020	7.19074	48.1948	44.8565
chr5	143838835	143838836	+	6	NA	exon (NM_013557.2, exon 15 of 15)	chr5	143838710	143839014	WT_rep1_peak_7121	16.184	175.912	172.107
chr9	7833935	7833936	-	6	NA	exon (NM_001291503.1, exon 2 of 8)	chr9	7833617	7834102	WT_rep1_peak_8786	4.44702	20.3375	17.2345
chr13	54809311	54809312	+	6	NA	exon (NM_178397.3, exon 11 of 11)	chr13	54808772	54809403	WT_rep1_peak_2295	42.0721	878.128	873.483
chr5	148442782	148442783	-	6	NA	exon (NM_001359199.1, exon 7 of 7)	chr5	148442570	148442954	WT_rep1_peak_7150	28.701	3527.06	3521.28
chr7	7286403	7286404	-	6	NA	exon (NM_001302386.1, exon 11 of 11)	chr7	7286316	7287317	WT_rep1_peak_7651	16.0667	508.116	503.798
chr10	34159563	34159564	+	6	NA	exon (NM_009433.3, exon 1 of 1)	chr10	34158549	34160201	WT_rep1_peak_732	9.57526	734.314	729.784
chr5	9562037	9562038	-	6	NA	exon (NM_181850.2, exon 4 of 6)	chr5	9561713	9562628	WT_rep1_peak_6557	15.5743	166.019	162.238
chr19	5851501	5851502	-	6	NA	exon (NR_002847.3, exon 1 of 1)	chr19	5851029	5852322	WT_rep1_peak_4414	9.25651	29693.2	29683.8
chr14	70774980	70774981	+	6	NA	exon (NM_145219.4, exon 8 of 8)	chr14	70774852	70775204	WT_rep1_peak_2749	2.83422	16.5632	13.5079
chr10	110780165	110780166	-	6	NA	exon (NM_001359622.1, exon 17 of 17)	chr10	110779943	110780303	WT_rep1_peak_999	103.068	2154.85	2149.53
chr13	112641288	112641289	+	6	NA	exon (NM_010560.3, exon 17 of 17)	chr13	112640642	112642188	WT_rep1_peak_2491	28.3275	390.722	386.539
chr15	78913638	78913639	+	6	NA	exon (NM_008197.3, exon 1 of 1)	chr15	78913242	78913907	WT_rep1_peak_3065	17.352	324.886	320.796
chr1	171894156	171894157	-	6	NA	exon (NM_021607.3, exon 17 of 17)	chr1	171893999	171894255	WT_rep1_peak_526	6.6681	51.8426	48.4822
chrX	52644736	52644737	-	5	NA	exon (NM_024170.2, exon 1 of 1)	chrX	52644509	52644968	WT_rep1_peak_9408	13.0161	247.966	244.006
chr17	22593979	22593980	+	5	NA	exon (NM_001347330.1, exon 3 of 3)	chr17	22593836	22594205	WT_rep1_peak_3679	6.17455	37.0328	33.7726
chrX	52644768	52644769	-	5	NA	exon (NM_024170.2, exon 1 of 1)	chrX	52644509	52644968	WT_rep1_peak_9408	13.0161	247.966	244.006
chr2	153051296	153051297	+	5	NA	exon (NM_133847.3, exon 18 of 18)	chr2	153051184	153051357	WT_rep1_peak_5249	10.6377	94.9042	91.3423
chr6	86365622	86365623	-	5	NA	exon (NM_001355687.1, exon 5 of 5)	chr6	86365260	86366401	WT_rep1_peak_7405	24.0595	310.851	306.782
chr3	35949542	35949543	-	5	NA	exon (NM_001205361.1, exon 7 of 7)	chr3	35948988	35949868	WT_rep1_peak_5522	12.2209	114.237	110.605
chr2	84432831	84432832	-	5	NA	exon (NM_001085448.1, exon 18 of 18)	chr2	84432447	84433168	WT_rep1_peak_4974	25.8378	343.776	339.657
chr9	27009338	27009339	-	5	NA	exon (NM_023277.4, exon 9 of 9)	chr9	27009145	27009421	WT_rep1_peak_8857	5.56483	30.6126	27.4041
chrX	73348051	73348052	+	5	NA	exon (NM_001358375.1, exon 9 of 9)	chrX	73347981	73348218	WT_rep1_peak_9450	3.90179	48.3207	44.9821
chr6	107546305	107546306	+	5	NA	exon (NM_008516.4, exon 2 of 2)	chr6	107544124	107546771	WT_rep1_peak_7456	45.8433	1211	1206.12
chr1	21006544	21006545	+	5	NA	exon (NM_001355122.1, exon 3 of 3)	chr1	21005540	21008076	WT_rep1_peak_49	34.3333	972.363	967.649
chr7	83547493	83547494	+	5	NA	exon (NM_001374090.1, exon 3 of 3)	chr7	83546856	83547927	WT_rep1_peak_7994	19.1063	407.794	403.59
chr9	67128365	67128366	-	5	NA	exon (NM_001081242.2, exon 58 of 58)	chr9	67128058	67128707	WT_rep1_peak_9069	15.6028	192.215	188.371
chr10	34174912	34174913	+	5	NA	exon (NM_030203.2, exon 1 of 1)	chr10	34174787	34175397	WT_rep1_peak_733	46.3489	3495.65	3489.88
chr8	14946979	14946980	+	5	NA	exon (NM_012000.3, exon 3 of 3)	chr8	14946626	14947351	WT_rep1_peak_8321	30.868	440.41	436.165
chr8	95302184	95302185	-	5	NA	exon (NM_001363456.1, exon 8 of 8)	chr8	95301948	95302264	WT_rep1_peak_8597	10.4934	90.2698	86.725
chr7	90118115	90118116	-	5	NA	exon (NM_026734.2, exon 5 of 5)	chr7	90117592	90118264	WT_rep1_peak_8023	5.91919	78.7216	75.2257
chr1	172197824	172197825	+	5	NA	exon (NM_001039484.1, exon 2 of 2)	chr1	172197671	172198401	WT_rep1_peak_533	22.5057	480.5	476.21
chr17	85371040	85371041	-	5	NA	exon (NM_001163622.1, exon 15 of 15)	chr17	85370969	85371392	WT_rep1_peak_3983	2.17649	129.607	125.927
chr10	34159671	34159672	+	5	NA	exon (NM_009433.3, exon 1 of 1)	chr10	34158549	34160201	WT_rep1_peak_732	9.57526	734.314	729.784
chr5	29437677	29437678	-	5	NA	exon (NM_020295.3, exon 17 of 17)	chr5	29437599	29437967	WT_rep1_peak_6631	9.88365	81.9265	78.4154
chr11	29171764	29171765	-	5	NA	exon (NM_025740.3, exon 10 of 10)	chr11	29171624	29172114	WT_rep1_peak_1160	23.0861	469.977	465.699
chr14	76744796	76744797	+	5	NA	exon (NM_001177751.2, exon 3 of 3)	chr14	76744701	76745118	WT_rep1_peak_2772	4.90806	399.54	395.346
chr6	91441957	91441958	-	5	NA	exon (NM_133928.2, exon 3 of 3)	chr6	91441866	91442245	WT_rep1_peak_7425	5.23079	31.6517	28.4365
chr10	34159669	34159670	+	5	NA	exon (NM_009433.3, exon 1 of 1)	chr10	34158549	34160201	WT_rep1_peak_732	9.57526	734.314	729.784
chr2	163311374	163311375	-	5	NA	exon (NM_173397.4, exon 2 of 2)	chr2	163311216	163311617	WT_rep1_peak_5321	11.916	109.774	106.157
chrX	151393802	151393803	-	5	NA	exon (NM_001290684.1, exon 10 of 10)	chrX	151393728	151394358	WT_rep1_peak_9574	8.46098	63.9727	60.5453
chr19	29589697	29589698	-	5	NA	exon (NM_001081213.2, exon 15 of 15)	chr19	29589615	29590028	WT_rep1_peak_4505	8.91827	69.8243	66.3675
chr6	39313485	39313486	-	5	NA	exon (NM_001361617.1, exon 17 of 17)	chr6	39313349	39314148	WT_rep1_peak_7270	12.983	125.584	121.915
chr5	135093902	135093903	+	5	NA	exon (NM_025362.3, exon 1 of 1)	chr5	135093736	135094368	WT_rep1_peak_7053	18.4197	211.552	207.664
chr16	38346882	38346883	-	5	NA	exon (NM_001300827.1, exon 11 of 11)	chr16	38346841	38347181	WT_rep1_peak_3420	17.2002	192.269	188.424
chr19	29589813	29589814	-	5	NA	exon (NM_001081213.2, exon 15 of 15)	chr19	29589615	29590028	WT_rep1_peak_4505	8.91827	69.8243	66.3675
chr7	65699008	65699009	+	5	NA	exon (NM_001291184.1, exon 21 of 21)	chr7	65698931	65699311	WT_rep1_peak_7921	10.4934	90.2698	86.725
chr13	24996816	24996817	+	5	NA	exon (NM_024473.3, exon 5 of 5)	chr13	24996578	24997204	WT_rep1_peak_2185	39.438	930.883	926.199
chr18	68388003	68388004	+	5	NA	exon (NM_001357444.1, exon 4 of 4)	chr18	68387116	68388173	WT_rep1_peak_4298	31.1324	448.435	444.181
chr18	58077235	58077236	+	5	NA	exon (NM_009194.3, exon 27 of 27)	chr18	58077055	58077391	WT_rep1_peak_4255	4.43218	21.9793	18.8593
chr15	78913719	78913720	+	5	NA	exon (NM_008197.3, exon 1 of 1)	chr15	78913242	78913907	WT_rep1_peak_3065	17.352	324.886	320.796
chr8	14946937	14946938	+	5	NA	exon (NM_012000.3, exon 3 of 3)	chr8	14946626	14947351	WT_rep1_peak_8321	30.868	440.41	436.165
chr15	78913564	78913565	+	5	NA	exon (NM_008197.3, exon 1 of 1)	chr15	78913242	78913907	WT_rep1_peak_3065	17.352	324.886	320.796
chr13	55873735	55873736	+	5	NA	exon (NM_175150.3, exon 5 of 5)	chr13	55873483	55873973	WT_rep1_peak_2316	40.5218	638.674	634.226
chr19	42064215	42064216	-	5	NA	exon (NM_198108.2, exon 5 of 5)	chr19	42063952	42064390	WT_rep1_peak_4552	8.0545	59.2048	55.8037
chr11	71680133	71680134	+	5	NA	exon (NM_001357960.1, exon 9 of 9)	chr11	71679899	71680364	WT_rep1_peak_1373	8.98133	109.829	106.211
chrX	151394232	151394233	-	5	NA	exon (NM_001290684.1, exon 10 of 10)	chrX	151393728	151394358	WT_rep1_peak_9574	8.46098	63.9727	60.5453
chr3	84072315	84072316	-	5	NA	exon (NM_001271725.1, exon 12 of 12)	chr3	84071891	84072524	WT_rep1_peak_5649	29.4646	675.556	671.075
chr4	10898243	10898244	+	5	NA	exon (NM_026005.3, exon 6 of 6)	chr4	10898021	10898482	WT_rep1_peak_5978	15.1678	158.69	154.926
chr7	100486446	100486447	+	5	NA	exon (NM_001362169.1, exon 9 of 9)	chr7	100486109	100487107	WT_rep1_peak_8067	38.7467	1844.25	1839.04
chr4	131931841	131931842	-	5	NA	exon (NM_145393.4, exon 4 of 5)	chr4	131931444	131932414	WT_rep1_peak_6373	27.7197	580.883	576.489
chr1	106652568	106652569	-	5	NA	exon (NM_027534.2, exon 10 of 10)	chr1	106652381	106652779	WT_rep1_peak_315	9.93446	82.9578	79.443
chr5	115235929	115235930	+	5	NA	exon (NM_029012.2, exon 11 of 11)	chr5	115235269	115236137	WT_rep1_peak_6932	27.414	2053.55	2048.27
chr17	35992798	35992799	-	5	NA	exon (NM_001198831.1, exon 18 of 18)	chr17	35992584	35993061	WT_rep1_peak_3811	10.2268	86.7671	83.2372
chr13	99558640	99558641	-	5	NA	exon (NM_008634.2, exon 7 of 7)	chr13	99558172	99558762	WT_rep1_peak_2448	18.6816	2692.97	2687.45
chr16	43439739	43439740	+	5	NA	exon (XM_006522407.5, exon 7 of 7)	chr16	43438898	43440230	WT_rep1_peak_3452	20.5719	805.887	801.295
chr18	67339456	67339457	+	5	NA	exon (NM_024190.2, exon 1 of 1)	chr18	67338528	67339526	WT_rep1_peak_4293	16.4889	180.909	177.091
chr1	172197811	172197812	+	5	NA	exon (NM_001039484.1, exon 2 of 2)	chr1	172197671	172198401	WT_rep1_peak_533	22.5057	480.5	476.21
chr19	23142920	23142921	+	5	NA	exon (NM_010638.5, exon 2 of 2)	chr19	23142074	23143203	WT_rep1_peak_4485	34.9381	1006.72	1001.98
chr13	112641156	112641157	+	5	NA	exon (NM_010560.3, exon 17 of 17)	chr13	112640642	112642188	WT_rep1_peak_2491	28.3275	390.722	386.539
chr16	38345800	38345801	-	5	NA	exon (NM_001300827.1, exon 11 of 11)	chr16	38345799	38346078	WT_rep1_peak_3419	7.80046	55.4649	52.084
chr18	54772220	54772221	+	5	NA	exon (NR_045400.1, exon 3 of 3)	chr18	54771992	54772329	WT_rep1_peak_4246	4.19298	18.3158	15.2352
chr14	66102811	66102812	+	5	NA	exon (NM_145944.5, exon 9 of 9)	chr14	66102488	66102823	WT_rep1_peak_2729	4.14217	17.6575	14.587
chr6	35238423	35238424	+	5	NA	exon (NM_001384235.1, exon 3 of 3)	chr6	35238399	35238549	WT_rep1_peak_7251	4.09136	17.0072	13.9434
chr1	13244378	13244379	-	5	NA	exon (NM_001302702.1, exon 11 of 22)	chr1	13244349	13245453	WT_rep1_peak_33	16.7024	254.481	250.508
chr10	34174960	34174961	+	5	NA	exon (NM_030203.2, exon 1 of 1)	chr10	34174787	34175397	WT_rep1_peak_733	46.3489	3495.65	3489.88
chr4	109242719	109242720	+	5	NA	exon (NM_001159964.1, exon 13 of 13)	chr4	109242450	109242810	WT_rep1_peak_6253	2.18167	12.2713	9.27769
chr15	19013820	19013821	+	5	NA	exon (NM_001316758.1, exon 12 of 12)	chr15	19013411	19013867	WT_rep1_peak_2897	15.6759	167.249	163.464
chr19	8857662	8857663	-	5	NA	exon (NM_001160356.1, exon 2 of 2)	chr19	8857404	8858000	WT_rep1_peak_4443	16.1332	174.668	170.866
chr11	115136189	115136190	+	5	NA	exon (NM_001033393.2, exon 10 of 10)	chr11	115135916	115136377	WT_rep1_peak_1654	7.59722	53.6206	50.2501
chr5	30815430	30815431	+	5	NA	exon (NM_175675.3, exon 6 of 6)	chr5	30815382	30815531	WT_rep1_peak_6635	4.24378	18.3158	15.2352
chr9	45772093	45772094	+	5	NA	exon (NM_001145947.2, exon 8 of 8)	chr9	45771501	45772390	WT_rep1_peak_8938	52.9933	1589	1583.93
chr7	83547578	83547579	+	5	NA	exon (NM_001374090.1, exon 3 of 3)	chr7	83546856	83547927	WT_rep1_peak_7994	19.1063	407.794	403.59
chr11	112935027	112935028	-	5	NA	exon (NR_015556.2, exon 3 of 3)	chr11	112934837	112935964	WT_rep1_peak_1644	9.32474	74.8043	71.3248
chr14	93252855	93252856	-	5	NA	exon (NM_001081377.3, exon 5 of 5)	chr14	93252627	93253045	WT_rep1_peak_2790	5.24791	28.7401	25.5509
chr2	91041346	91041347	+	5	NA	exon (NM_001357067.1, exon 11 of 11)	chr2	91041100	91041880	WT_rep1_peak_4989	12.8141	242.324	238.373
chrX	52610775	52610776	+	5	NA	exon (NM_028375.3, exon 2 of 2)	chrX	52610579	52611041	WT_rep1_peak_9407	5.09333	59.0988	55.7006
chr9	115072595	115072596	-	5	NA	exon (NM_024222.3, exon 16 of 16)	chr9	115072120	115072878	WT_rep1_peak_9295	3.17599	28.1941	25.0096
chr5	148442835	148442836	-	5	NA	exon (NM_001359199.1, exon 7 of 7)	chr5	148442570	148442954	WT_rep1_peak_7150	28.701	3527.06	3521.28
chr11	70901048	70901049	-	5	NA	exon (NM_001291146.1, exon 7 of 7)	chr11	70900803	70901186	WT_rep1_peak_1370	7.69884	54.5406	51.1655
chr14	20366561	20366562	+	5	NA	exon (NM_001359868.1, exon 10 of 10)	chr14	20366345	20366622	WT_rep1_peak_2534	15.0154	156.264	152.507
chr9	115072702	115072703	-	4	NA	exon (NM_024222.3, exon 16 of 16)	chr9	115072120	115072878	WT_rep1_peak_9295	3.17599	28.1941	25.0096
chr2	120148345	120148346	-	4	NA	exon (NM_001363053.1, exon 24 of 24)	chr2	120147990	120148500	WT_rep1_peak_5100	13.9141	192.25	188.406
chr3	84072301	84072302	-	4	NA	exon (NM_001271725.1, exon 12 of 12)	chr3	84071891	84072524	WT_rep1_peak_5649	29.4646	675.556	671.075
chr14	14518875	14518876	-	4	NA	exon (NM_001081427.1, exon 46 of 46)	chr14	14518862	14519126	WT_rep1_peak_2533	5.05674	26.0491	22.8824
chr2	25949859	25949860	-	4	NA	exon (NM_001037098.1, exon 6 of 6)	chr2	25949737	25950084	WT_rep1_peak_4757	5.66645	32.183	28.9616
chr16	21471794	21471795	-	4	NA	exon (NM_001001881.2, exon 2 of 2)	chr16	21471696	21472589	WT_rep1_peak_3346	35.8286	543.533	539.178
chr5	9562042	9562043	-	4	NA	exon (NM_181850.2, exon 4 of 6)	chr5	9561713	9562628	WT_rep1_peak_6557	15.5743	166.019	162.238
chr9	44548280	44548281	+	4	NA	exon (NM_001110826.1, exon 14 of 14)	chr9	44547728	44548864	WT_rep1_peak_8922	26.1809	1006.87	1002.13
chr11	3594981	3594982	-	4	NA	exon (NR_002321.2, exon 3 of 4)	chr11	3594842	3595611	WT_rep1_peak_1086	18.848	318.896	314.815
chr9	45772083	45772084	+	4	NA	exon (NM_001145947.2, exon 8 of 8)	chr9	45771501	45772390	WT_rep1_peak_8938	52.9933	1589	1583.93
chr11	32694905	32694906	+	4	NA	exon (NM_001271347.1, exon 13 of 13)	chr11	32694643	32694956	WT_rep1_peak_1183	8.44361	86.4696	82.9408
chr13	23924075	23924076	+	4	NA	TTS (NM_015786.3) NA NA NA chr13	23923821	23924090	WT_rep1_peak_2182	784	81.9265	78.4154	138
chr14	21843146	21843147	+	4	NA	exon (NM_001359953.1, exon 6 of 6)	chr14	21843021	21843492	WT_rep1_peak_2550	6.55447	94.9171	91.3551
chr3	129428197	129428198	+	4	NA	exon (NM_130450.2, exon 5 of 5)	chr3	129427839	129428648	WT_rep1_peak_5884	5.45718	86.6761	83.1467
chr9	50576858	50576859	-	4	NA	exon (NM_001311069.1, exon 20 of 20)	chr9	50576423	50577363	WT_rep1_peak_8960	33.1756	526.248	521.911
chr2	155660238	155660239	-	4	NA	exon (NM_001384169.1, exon 2 of 2)	chr2	155659735	155660250	WT_rep1_peak_5275	2.6154	13.3846	10.3723
chr15	73077322	73077323	-	4	NA	exon (NM_001358045.1, exon 34 of 34)	chr15	73077185	73077994	WT_rep1_peak_3015	13.796	138.365	134.657
chr11	95382856	95382857	+	4	NA	exon (NM_001359107.1, exon 10 of 10)	chr11	95382516	95383633	WT_rep1_peak_1525	56.0413	2887.9	2882.31
chr18	47381559	47381560	-	4	NA	exon (NM_001311097.1, exon 18 of 18)	chr18	47381040	47382400	WT_rep1_peak_4237	22.8401	289.773	285.739
chr9	56402928	56402929	+	4	NA	exon (NM_025812.3, exon 10 of 10)	chr9	56401735	56403070	WT_rep1_peak_8998	18.201	318.6	314.519
chr7	109908276	109908277	-	4	NA	exon (NM_177324.2, exon 41 of 41)	chr7	109907832	109908413	WT_rep1_peak_8102	28.1531	389.696	385.514
chr7	130586993	130586994	+	4	NA	exon (NM_019564.3, exon 9 of 9)	chr7	130586677	130587127	WT_rep1_peak_8200	13.6137	405.043	400.843
chrX	151393966	151393967	-	4	NA	exon (NM_001290684.1, exon 10 of 10)	chrX	151393728	151394358	WT_rep1_peak_9574	8.46098	63.9727	60.5453
chr10	34175296	34175297	+	4	NA	exon (NM_030203.2, exon 1 of 1)	chr10	34174787	34175397	WT_rep1_peak_733	46.3489	3495.65	3489.88
chr3	132545713	132545714	+	4	NA	exon (NM_001163455.2, exon 26 of 26)	chr3	132545155	132545805	WT_rep1_peak_5891	10.1577	117.22	113.578
chr4	147959316	147959317	-	4	NA	exon (NM_001285920.1, exon 20 of 20)	chr4	147959148	147959924	WT_rep1_peak_6468	19.285	617.695	613.265
chr6	39313951	39313952	-	4	NA	exon (NM_001361617.1, exon 17 of 17)	chr6	39313349	39314148	WT_rep1_peak_7270	12.983	125.584	121.915
chr8	26472600	26472601	-	4	NA	exon (NM_029037.4, exon 5 of 5)	chr8	26472412	26472738	WT_rep1_peak_8377	5.10755	26.0491	22.8824
chr19	59287153	59287154	-	4	NA	exon (NM_001033222.3, exon 5 of 5)	chr19	59286751	59287179	WT_rep1_peak_4638	5.97131	35.3937	32.1463
chr14	122396409	122396410	+	4	NA	exon (NM_080556.3, exon 17 of 17)	chr14	122396127	122396411	WT_rep1_peak_2844	4.54864	21.0265	17.9141
chr6	32769703	32769704	-	4	NA	exon (NM_001355667.1, exon 9 of 9)	chr6	32769330	32769762	WT_rep1_peak_7242	5.95573	55.257	51.8794
chr19	42064322	42064323	-	4	NA	exon (NM_198108.2, exon 5 of 5)	chr19	42063952	42064390	WT_rep1_peak_4552	8.0545	59.2048	55.8037
chr4	49586551	49586552	-	4	NA	exon (NM_001355503.1, exon 2 of 2)	chr4	49585453	49586760	WT_rep1_peak_6118	20.8724	330.951	326.851
chr16	96120865	96120866	+	4	NA	exon (NM_001122993.1, exon 4 of 4)	chr16	96120631	96120985	WT_rep1_peak_3591	8.95419	96.1129	92.5457
chr7	61999374	61999375	+	4	NA	exon (NM_010882.3, exon 1 of 1)	chr7	61999345	61999650	WT_rep1_peak_7902	29.6277	605.392	600.973
chr9	21265552	21265553	+	4	NA	exon (NM_001199186.1, exon 22 of 22)	chr9	21265320	21265869	WT_rep1_peak_8839	7.49994	52.4575	49.0951
chr14	103941499	103941500	+	4	NA	exon (NM_001361639.1, exon 8 of 8)	chr14	103941217	103941610	WT_rep1_peak_2813	10.8401	283.233	279.211
chr9	100984515	100984516	-	4	NA	exon (NM_001161362.3, exon 14 of 14)	chr9	100984431	100984847	WT_rep1_peak_9191	5.25998	27.5449	24.3638
chr2	83709976	83709977	+	4	NA	exon (NM_175514.3, exon 8 of 8)	chr2	83709356	83710910	WT_rep1_peak_4970	13.1408	1344.8	1339.84
chr13	34366422	34366423	-	4	NA	exon (NM_001033167.3, exon 11 of 11)	chr13	34365718	34367085	WT_rep1_peak_2208	24.0087	310.851	306.782
chr8	125070769	125070770	+	4	NA	exon (NM_139272.2, exon 16 of 16)	chr8	125070655	125070961	WT_rep1_peak_8746	11.1031	98.818	95.2407
chr3	51400995	51400996	+	4	NA	exon (NM_016858.2, exon 2 of 2)	chr3	51400858	51401299	WT_rep1_peak_5570	16.1332	174.668	170.866
chr6	34134918	34134919	-	4	NA	exon (NM_021435.3, exon 10 of 10)	chr6	34133584	34135460	WT_rep1_peak_7243	19.6899	233.901	229.968
chr1	60516406	60516407	+	4	NA	exon (NM_001198571.1, exon 11 of 11)	chr1	60515763	60516524	WT_rep1_peak_189	26.0999	821.061	816.458
chr13	108184580	108184581	+	4	NA	exon (NM_001048250.2, exon 3 of 3)	chr13	108183989	108184602	WT_rep1_peak_2479	21.5698	266.285	262.292
chr4	147959472	147959473	-	4	NA	exon (NM_001285920.1, exon 20 of 20)	chr4	147959148	147959924	WT_rep1_peak_6468	19.285	617.695	613.265
chr9	58784147	58784148	-	4	NA	exon (NM_001042752.1, exon 28 of 28)	chr9	58784092	58784640	WT_rep1_peak_9024	6.44445	57.6	54.2078
chr4	155240640	155240641	-	4	NA	exon (NM_001357191.1, exon 6 of 6)	chr4	155240182	155241815	WT_rep1_peak_6522	12.9259	376.195	372.032
chr10	41404872	41404873	+	4	NA	exon (NM_016898.2, exon 6 of 6)	chr10	41404734	41404903	WT_rep1_peak_749	3.46277	26.9248	23.7515
chr11	17028607	17028608	+	4	NA	exon (NM_029861.3, exon 3 of 3)	chr11	17028464	17028705	WT_rep1_peak_1124	5.43345	81.6821	78.174
chr2	124507636	124507637	+	4	NA	exon (NM_001290997.1, exon 21 of 21)	chr2	124506036	124507873	WT_rep1_peak_5133	46.4157	765.804	761.246
chr6	107546451	107546452	+	4	NA	exon (NM_008516.4, exon 2 of 2)	chr6	107544124	107546771	WT_rep1_peak_7456	45.8433	1211	1206.12
chr8	26472524	26472525	-	4	NA	exon (NM_029037.4, exon 5 of 5)	chr8	26472412	26472738	WT_rep1_peak_8377	5.10755	26.0491	22.8824
chr1	172199512	172199513	+	4	NA	exon (NM_001039484.1, exon 2 of 2)	chr1	172199037	172199626	WT_rep1_peak_534	35.8361	1152.66	1147.82
chr3	88636885	88636886	+	4	NA	exon (NM_001163310.1, exon 5 of 5)	chr3	88636427	88636961	WT_rep1_peak_5681	3.74001	28.7483	25.5591
chr6	67261026	67261027	-	4	NA	exon (NM_001113564.1, exon 8 of 8)	chr6	67260860	67261119	WT_rep1_peak_7341	7.6125	84.2335	80.7133
chr4	115855462	115855463	-	4	NA	exon (NM_010173.5, exon 15 of 15)	chr4	115855203	115855607	WT_rep1_peak_6261	3.66671	45.1786	41.8607
chr5	114947079	114947080	-	4	NA	exon (NR_027817.1, exon 2 of 2)	chr5	114946911	114947232	WT_rep1_peak_6930	19.4855	439.973	435.729
chr9	53484054	53484055	+	4	NA	exon (NM_001081152.1, exon 18 of 18)	chr9	53483846	53484150	WT_rep1_peak_8980	6.02212	35.3937	32.1463
chr10	34175034	34175035	+	4	NA	exon (NM_030203.2, exon 1 of 1)	chr10	34174787	34175397	WT_rep1_peak_733	46.3489	3495.65	3489.88
chr9	56825251	56825252	-	4	NA	exon (NM_175483.5, exon 2 of 2)	chr9	56825176	56825532	WT_rep1_peak_9004	11.4079	103.165	99.5722
chr4	41190917	41190918	+	4	NA	exon (NM_026275.4, exon 5 of 5)	chr4	41190600	41191222	WT_rep1_peak_6043	19.5079	250.534	246.569
chr14	76744901	76744902	+	4	NA	exon (NM_001177751.2, exon 3 of 3)	chr14	76744701	76745118	WT_rep1_peak_2772	4.90806	399.54	395.346
chr2	131836591	131836592	-	4	NA	exon (NM_001362866.1, exon 11 of 11)	chr2	131836525	131837212	WT_rep1_peak_5184	16.6921	183.42	179.596
chr10	69860370	69860371	+	4	NA	exon (NM_009670.4, exon 20 of 20)	chr10	69859778	69860560	WT_rep1_peak_830	9.26756	320.85	316.766
chr19	29589830	29589831	-	4	NA	exon (NM_001081213.2, exon 15 of 15)	chr19	29589615	29590028	WT_rep1_peak_4505	8.91827	69.8243	66.3675
chr7	35247366	35247367	-	4	NA	exon (NM_033080.2, exon 3 of 3)	chr7	35247194	35247504	WT_rep1_peak_7802	5.1174	33.6907	30.4606
chr7	140433937	140433938	-	4	NA	exon (NM_018742.5, exon 4 of 4)	chr7	140433584	140433978	WT_rep1_peak_8231	6.58103	42.0786	38.7814
chr11	75594833	75594834	+	4	NA	exon (NM_001277219.1, exon 3 of 3)	chr11	75594071	75595044	WT_rep1_peak_1399	13.1759	208.494	204.614
chr7	83547308	83547309	+	4	NA	exon (NM_001374090.1, exon 3 of 3)	chr7	83546856	83547927	WT_rep1_peak_7994	19.1063	407.794	403.59
chr8	103360652	103360653	-	4	NA	exon (NM_009866.5, exon 13 of 13)	chr8	103360357	103361318	WT_rep1_peak_8612	36.2901	826.164	821.557
chr11	80286527	80286528	+	4	NA	exon (NM_001130169.1, exon 12 of 12)	chr11	80286343	80286658	WT_rep1_peak_1454	18.5651	253.582	249.611
chr5	123668307	123668308	-	4	NA	exon (NM_001359513.1, exon 12 of 12)	chr5	123668179	123668334	WT_rep1_peak_6990	5.71726	32.183	28.9616
chr10	69860374	69860375	+	4	NA	exon (NM_009670.4, exon 20 of 20)	chr10	69859778	69860560	WT_rep1_peak_830	9.26756	320.85	316.766
chr9	53529022	53529023	-	4	NA	exon (NM_001161618.2, exon 18 of 18)	chr9	53528841	53529352	WT_rep1_peak_8981	8.15639	60.826	57.4182
chr3	129428232	129428233	+	4	NA	exon (NM_130450.2, exon 5 of 5)	chr3	129427839	129428648	WT_rep1_peak_5884	5.45718	86.6761	83.1467
chr12	17841352	17841353	+	4	NA	exon (NM_001361645.1, exon 5 of 5)	chr12	17841314	17841483	WT_rep1_peak_1750	5.52603	41.4578	38.1667
chr4	106906421	106906422	+	4	NA	exon (NM_001355532.1, exon 15 of 15)	chr4	106906281	106906444	WT_rep1_peak_6236	2.55514	9.86492	6.92225
chr10	13391146	13391147	+	4	NA	exon (NM_001330198.1, exon 8 of 8)	chr10	13390850	13391216	WT_rep1_peak_668	10.2901	87.1164	83.5837
chr11	65581178	65581179	-	4	NA	exon (NM_001316367.1, exon 12 of 12)	chr11	65580555	65581750	WT_rep1_peak_1333	41.1217	2270.32	2264.96
chr12	72259043	72259044	+	4	NA	exon (NM_001007596.2, exon 7 of 7)	chr12	72258826	72259181	WT_rep1_peak_1871	2.00191	51.0761	47.7216
chr4	47470110	47470111	-	4	NA	exon (NM_001355496.1, exon 2 of 2)	chr4	47469985	47470741	WT_rep1_peak_6110	18.4626	354.051	349.919
chrX	52610802	52610803	+	4	NA	exon (NM_028375.3, exon 2 of 2)	chrX	52610579	52611041	WT_rep1_peak_9407	5.09333	59.0988	55.7006
chr5	139459065	139459066	-	4	NA	exon (NM_001159908.1, exon 7 of 7)	chr5	139458852	139459162	WT_rep1_peak_7094	13.0338	126.733	123.061
chr9	56825336	56825337	-	4	NA	exon (NM_175483.5, exon 2 of 2)	chr9	56825176	56825532	WT_rep1_peak_9004	11.4079	103.165	99.5722
chr2	151951259	151951260	+	4	NA	exon (NM_029688.5, exon 2 of 2)	chr2	151951109	151951887	WT_rep1_peak_5240	8.84486	282.956	278.934
chr3	152491290	152491291	+	4	NA	exon (NM_025662.5, exon 11 of 11)	chr3	152491085	152491370	WT_rep1_peak_5928	17.1783	220.844	216.937
chr11	6056780	6056781	-	4	NA	exon (NM_001363446.1, exon 5 of 5)	chr11	6056616	6057200	WT_rep1_peak_1107	21.8925	1084.92	1080.12
chr3	84072170	84072171	-	4	NA	exon (NM_001271725.1, exon 12 of 12)	chr3	84071891	84072524	WT_rep1_peak_5649	29.4646	675.556	671.075
chr9	107416944	107416945	-	4	NA	exon (NM_001357289.1, exon 4 of 4)	chr9	107416817	107416972	WT_rep1_peak_9224	5.86969	33.7769	30.5425
chr5	135093846	135093847	+	4	NA	exon (NM_025362.3, exon 1 of 1)	chr5	135093736	135094368	WT_rep1_peak_7053	18.4197	211.552	207.664
chr2	30174598	30174599	-	4	NA	exon (NM_177648.3, exon 1 of 1)	chr2	30174362	30174730	WT_rep1_peak_4798	21.9763	273.148	269.143
chr2	124506980	124506981	+	4	NA	exon (NM_001290997.1, exon 21 of 21)	chr2	124506036	124507873	WT_rep1_peak_5133	46.4157	765.804	761.246
chr15	44503872	44503873	+	4	NA	exon (NM_001357690.1, exon 7 of 7)	chr15	44503557	44504079	WT_rep1_peak_2963	4.07521	49.8871	46.5414
chr16	84749825	84749826	-	4	NA	Intergenic NA NA NA chr16 84749591	84750024	WT_rep1_peak_3534	218	.	21.8436	391
chr9	45772095	45772096	+	4	NA	exon (NM_001145947.2, exon 8 of 8)	chr9	45771501	45772390	WT_rep1_peak_8938	52.9933	1589	1583.93
chr1	132443127	132443128	-	4	NA	exon (NM_177129.5, exon 23 of 23)	chr1	132442714	132443242	WT_rep1_peak_359	7.4956	51.794	48.4339
chr11	88930809	88930810	-	4	NA	exon (NM_001362845.1, exon 11 of 11)	chr11	88930656	88931718	WT_rep1_peak_1500	63.5035	1513.64	1508.6
chr6	86249264	86249265	+	4	NA	exon (NM_031199.5, exon 6 of 6)	chr6	86249019	86249297	WT_rep1_peak_7402	6.88588	44.6706	41.3547
chr18	54772217	54772218	+	4	NA	exon (NR_045400.1, exon 3 of 3)	chr18	54771992	54772329	WT_rep1_peak_4246	4.19298	18.3158	15.2352
chr8	78323641	78323642	-	4	NA	exon (NM_001364445.1, exon 11 of 11)	chr8	78322971	78323768	WT_rep1_peak_8524	36.2798	717.85	713.333
chr8	65171890	65171891	-	4	NA	exon (NM_025436.3, exon 6 of 6)	chr8	65171686	65172218	WT_rep1_peak_8452	10.5481	251.47	247.503
chr18	37860552	37860553	+	3	NA	exon (NM_033591.3, exon 1 of 4)	chr18	37860467	37860979	WT_rep1_peak_4186	8.30855	62.0534	58.6372
chr15	39734676	39734677	-	3	NA	exon (NM_001347036.2, exon 6 of 6)	chr15	39734624	39734857	WT_rep1_peak_2948	5.66645	32.183	28.9616
chr4	59772120	59772121	-	3	NA	exon (NM_001013577.1, exon 5 of 5)	chr4	59771868	59772395	WT_rep1_peak_6148	12.1701	114.237	110.605
chr18	24147102	24147103	-	3	NA	exon (NM_001357447.1, exon 4 of 4)	chr18	24146951	24147537	WT_rep1_peak_4070	51.7517	1024.04	1019.29
chrX	55838522	55838523	+	3	NA	exon (NM_001077361.1, exon 8 of 8)	chrX	55838393	55838543	WT_rep1_peak_9415	4.90431	24.5796	21.4301
chr2	124507366	124507367	+	3	NA	exon (NM_001290997.1, exon 21 of 21)	chr2	124506036	124507873	WT_rep1_peak_5133	46.4157	765.804	761.246
chrX	52671468	52671469	-	3	NA	exon (NM_001018063.2, exon 1 of 1)	chrX	52671161	52671611	WT_rep1_peak_9409	6.89315	142.278	138.56
chr3	152491324	152491325	+	3	NA	exon (NM_025662.5, exon 11 of 11)	chr3	152491085	152491370	WT_rep1_peak_5928	17.1783	220.844	216.937
chr8	129229597	129229598	+	3	NA	exon (NM_001358959.1, exon 17 of 17)	chr8	129229029	129230261	WT_rep1_peak_8769	108.273	3375.3	3369.57
chr16	11623037	11623038	-	3	NA	exon (NM_146067.3, exon 4 of 4)	chr16	11622449	11623301	WT_rep1_peak_3297	8.30855	62.0534	58.6372
chr5	66459354	66459355	-	3	NA	exon (NM_001201413.1, exon 17 of 17)	chr5	66459106	66459919	WT_rep1_peak_6765	22.586	284.207	280.184
chr10	98859101	98859102	+	3	NA	exon (NM_001359506.1, exon 22 of 22)	chr10	98858603	98859526	WT_rep1_peak_969	38.3232	3871.01	3865.17
chr4	155643444	155643445	+	3	NA	exon (NM_001160016.1, exon 12 of 12)	chr4	155643439	155643652	WT_rep1_peak_6525	6.84316	176.393	172.586
chr16	96117322	96117323	+	3	NA	exon (NM_001122993.1, exon 4 of 4)	chr16	96116516	96117635	WT_rep1_peak_3589	31.935	461.854	457.585
chr6	107546516	107546517	+	3	NA	exon (NM_008516.4, exon 2 of 2)	chr6	107544124	107546771	WT_rep1_peak_7456	45.8433	1211	1206.12
chr7	41023037	41023038	-	3	NA	exon (NM_001199330.1, exon 5 of 5)	chr7	41022963	41023355	WT_rep1_peak_7820	8.81665	67.8584	64.4111
chr11	3595055	3595056	-	3	NA	exon (NR_002321.2, exon 3 of 4)	chr11	3594842	3595611	WT_rep1_peak_1086	18.848	318.896	314.815
chr11	52013040	52013041	+	3	NA	exon (NM_019411.4, exon 7 of 7)	chr11	52012689	52013521	WT_rep1_peak_1241	3.12598	147.81	144.077
chr16	19941935	19941936	+	3	NA	exon (NM_029436.3, exon 8 of 8)	chr16	19941676	19942092	WT_rep1_peak_3336	9.09244	160.465	156.697
chr1	13212686	13212687	-	3	NA	exon (NM_001302702.1, exon 22 of 22)	chr1	13212634	13212839	WT_rep1_peak_32	2.53939	13.9185	10.8996
chr7	65698954	65698955	+	3	NA	exon (NM_001291184.1, exon 21 of 21)	chr7	65698931	65699311	WT_rep1_peak_7921	10.4934	90.2698	86.725
chr7	63989852	63989853	+	3	NA	exon (NM_172742.2, exon 16 of 16)	chr7	63989777	63990010	WT_rep1_peak_7911	10.0869	85.0304	81.5061
chr3	32574668	32574669	+	3	NA	exon (NM_001161818.1, exon 7 of 7)	chr3	32573973	32574690	WT_rep1_peak_5512	16.0347	263.349	259.362
chr9	106341330	106341331	-	3	NA	exon (NM_001159652.2, exon 1 of 1)	chr9	106341046	106341392	WT_rep1_peak_9212	3.67895	28.6895	25.5006
chr5	127673492	127673493	-	3	NA	exon (NM_133895.1, exon 8 of 8)	chr5	127673454	127673710	WT_rep1_peak_7020	7.19074	48.1948	44.8565
chr4	57710407	57710408	+	3	NA	exon (NM_001384149.1, exon 7 of 7)	chr4	57709485	57710616	WT_rep1_peak_6136	12.3733	116.485	112.845
chr10	62395155	62395156	-	3	NA	exon (NM_028197.2, exon 7 of 7)	chr10	62394900	62395397	WT_rep1_peak_797	3.78883	74.6057	71.128
chr12	17035130	17035131	+	3	NA	exon (NM_009072.2, exon 33 of 33)	chr12	17034558	17035134	WT_rep1_peak_1748	78.3224	1612.85	1607.76
chr9	100984582	100984583	-	3	NA	exon (NM_001161362.3, exon 14 of 14)	chr9	100984431	100984847	WT_rep1_peak_9191	5.25998	27.5449	24.3638
chr9	56402834	56402835	+	3	NA	exon (NM_025812.3, exon 10 of 10)	chr9	56401735	56403070	WT_rep1_peak_8998	18.201	318.6	314.519
chr2	120148079	120148080	-	3	NA	exon (NM_001363053.1, exon 24 of 24)	chr2	120147990	120148500	WT_rep1_peak_5100	13.9141	192.25	188.406
chr4	109242632	109242633	+	3	NA	exon (NM_001159964.1, exon 13 of 13)	chr4	109242450	109242810	WT_rep1_peak_6253	2.18167	12.2713	9.27769
chr12	84966000	84966001	-	3	NA	exon (NM_001364189.1, exon 20 of 20)	chr12	84965972	84967009	WT_rep1_peak_1950	22.0465	624.824	620.387
chr9	46113818	46113819	+	3	NA	intron (XM_006510590.4, intron 14 of 23)	chr9	46113423	46113853	WT_rep1_peak_8942	18.9199	258.725	254.745
chr12	117720519	117720520	+	3	NA	exon (NM_001373989.1, exon 26 of 26)	chr12	117719824	117720663	WT_rep1_peak_2098	29.4803	848.75	844.127
chr1	21007634	21007635	+	3	NA	exon (NM_001355122.1, exon 3 of 3)	chr1	21005540	21008076	WT_rep1_peak_49	34.3333	972.363	967.649
chr11	3595003	3595004	-	3	NA	exon (NR_002321.2, exon 3 of 4)	chr11	3594842	3595611	WT_rep1_peak_1086	18.848	318.896	314.815
chr12	25009251	25009252	+	3	NA	exon (NM_001083341.1, exon 12 of 12)	chr12	25008962	25009447	WT_rep1_peak_1757	17.9116	203.788	199.917
chr7	100489125	100489126	+	3	NA	exon (NM_001362169.1, exon 9 of 9)	chr7	100488380	100489165	WT_rep1_peak_8068	5.19921	62.0038	58.5891
chr11	3594973	3594974	-	3	NA	exon (NR_002321.2, exon 3 of 4)	chr11	3594842	3595611	WT_rep1_peak_1086	18.848	318.896	314.815
chr4	57710354	57710355	+	3	NA	exon (NM_001384149.1, exon 7 of 7)	chr4	57709485	57710616	WT_rep1_peak_6136	12.3733	116.485	112.845
chr4	59772288	59772289	-	3	NA	exon (NM_001013577.1, exon 5 of 5)	chr4	59771868	59772395	WT_rep1_peak_6148	12.1701	114.237	110.605
chr9	111101704	111101705	+	3	NA	exon (NM_175266.4, exon 1 of 1)	chr9	111101378	111103171	WT_rep1_peak_9279	23.586	800.917	796.329
chr11	20598850	20598851	+	3	NA	exon (NM_001038625.1, exon 2 of 2)	chr11	20598510	20599026	WT_rep1_peak_1132	6.53022	41.2246	37.9343
chr7	7286414	7286415	-	3	NA	exon (NM_001302386.1, exon 11 of 11)	chr7	7286316	7287317	WT_rep1_peak_7651	16.0667	508.116	503.798
chr6	38675176	38675177	-	3	NA	exon (NM_001136065.2, exon 15 of 15)	chr6	38674756	38675522	WT_rep1_peak_7267	30.6308	811.133	806.537
chr1	134359853	134359854	+	3	NA	exon (NM_001306069.1, exon 8 of 8)	chr1	134359813	134359936	WT_rep1_peak_388	3.98974	16.3651	13.3114
chr7	16231305	16231306	-	3	NA	exon (NM_172739.4, exon 7 of 7)	chr7	16230748	16231832	WT_rep1_peak_7674	8.69053	520.184	515.853
chr10	69860404	69860405	+	3	NA	exon (NM_009670.4, exon 20 of 20)	chr10	69859778	69860560	WT_rep1_peak_830	9.26756	320.85	316.766
chr10	79511918	79511919	+	3	NA	exon (NM_148934.3, exon 2 of 2)	chr10	79511665	79511932	WT_rep1_peak_871	14.2533	145.461	141.734
chr5	142549436	142549437	-	3	NA	exon (NM_175217.6, exon 7 of 7)	chr5	142549272	142549560	WT_rep1_peak_7103	13.2499	189.068	185.232
chr17	53813557	53813558	+	3	NA	exon (NM_025887.4, exon 6 of 6)	chr17	53813463	53813614	WT_rep1_peak_3887	3.23822	17.0235	13.9595
chr12	91776022	91776023	-	3	NA	exon (NM_001039089.1, exon 21 of 21)	chr12	91775082	91776564	WT_rep1_peak_1989	25.87	991.174	986.445
chr14	27124808	27124809	+	3	NA	exon (NM_001289686.1, exon 13 of 13)	chr14	27124461	27125231	WT_rep1_peak_2566	3.71297	44.6979	41.3819
chr9	50576985	50576986	-	3	NA	exon (NM_001311069.1, exon 20 of 20)	chr9	50576423	50577363	WT_rep1_peak_8960	33.1756	526.248	521.911
chr14	14518997	14518998	-	3	NA	exon (NM_001081427.1, exon 46 of 46)	chr14	14518862	14519126	WT_rep1_peak_2533	5.05674	26.0491	22.8824
chr2	125581971	125581972	-	3	NA	exon (NM_001369056.1, exon 13 of 13)	chr2	125581452	125582652	WT_rep1_peak_5138	8.9921	688.716	684.225
chr5	19408566	19408567	-	3	NA	exon (NR_102341.1, exon 4 of 4)	chr5	19408388	19408661	WT_rep1_peak_6580	9.17231	72.8013	69.331
chr18	58077128	58077129	+	3	NA	exon (NM_009194.3, exon 27 of 27)	chr18	58077055	58077391	WT_rep1_peak_4255	4.43218	21.9793	18.8593
chr12	77522412	77522413	+	3	NA	exon (NM_001252614.1, exon 13 of 13)	chr12	77521882	77522614	WT_rep1_peak_1900	30.3091	429.767	425.535
chr5	139459067	139459068	-	3	NA	exon (NM_001159908.1, exon 7 of 7)	chr5	139458852	139459162	WT_rep1_peak_7094	13.0338	126.733	123.061
chr4	109242753	109242754	+	3	NA	exon (NM_001159964.1, exon 13 of 13)	chr4	109242450	109242810	WT_rep1_peak_6253	2.18167	12.2713	9.27769
chr16	84749758	84749759	-	3	NA	Intergenic NA NA NA chr16 84749591	84750024	WT_rep1_peak_3534	218	.	21.8436	391
chr7	35247346	35247347	-	3	NA	exon (NM_033080.2, exon 3 of 3)	chr7	35247194	35247504	WT_rep1_peak_7802	5.1174	33.6907	30.4606
chr2	91041858	91041859	+	3	NA	exon (NM_001357067.1, exon 11 of 11)	chr2	91041100	91041880	WT_rep1_peak_4989	12.8141	242.324	238.373
chr16	17719916	17719917	-	3	NA	exon (NM_001081633.1, exon 10 of 10)	chr16	17719789	17720008	WT_rep1_peak_3325	11.6112	106.457	102.851
chr11	3596885	3596886	-	3	NA	exon (NR_002321.2, exon 2 of 4)	chr11	3596525	3597098	WT_rep1_peak_1087	24.5676	320.795	316.711
chr7	65699038	65699039	+	3	NA	exon (NM_001291184.1, exon 21 of 21)	chr7	65698931	65699311	WT_rep1_peak_7921	10.4934	90.2698	86.725
chr11	76670892	76670893	-	3	NA	exon (NM_007754.2, exon 21 of 21)	chr11	76670220	76670999	WT_rep1_peak_1411	10.4177	128.488	124.81
chr6	91441912	91441913	-	3	NA	exon (NM_133928.2, exon 3 of 3)	chr6	91441866	91442245	WT_rep1_peak_7425	5.23079	31.6517	28.4365
chr6	38675407	38675408	-	3	NA	exon (NM_001136065.2, exon 15 of 15)	chr6	38674756	38675522	WT_rep1_peak_7267	30.6308	811.133	806.537
chr16	91067664	91067665	+	3	NA	exon (NM_016968.4, exon 1 of 1)	chr16	91067445	91067790	WT_rep1_peak_3551	5.05725	60.1421	56.7379
chr4	101010418	101010419	-	3	NA	exon (NM_013567.1, exon 23 of 23)	chr4	101010283	101010490	WT_rep1_peak_6210	7.86899	91.1884	87.6411
chr17	43954404	43954405	-	3	NA	exon (NM_001357122.1, exon 9 of 9)	chr17	43954031	43954431	WT_rep1_peak_3828	6.88588	44.6706	41.3547
chr3	115821497	115821498	+	3	NA	exon (NM_001163514.1, exon 5 of 5)	chr3	115820703	115821861	WT_rep1_peak_5847	12.2988	277.937	273.924
chr4	118994425	118994426	+	3	NA	exon (NM_011400.3, exon 10 of 10)	chr4	118993569	118994491	WT_rep1_peak_6273	6.66653	130.548	126.864
chr2	155965824	155965825	-	3	NA	exon (NM_010911.2, exon 13 of 13)	chr2	155965730	155965948	WT_rep1_peak_5281	4.49783	21.0265	17.9141
chr17	33910777	33910778	-	3	NA	exon (NM_001252480.1, exon 5 of 5)	chr17	33910542	33910968	WT_rep1_peak_3788	10.5861	138.743	135.034
chr9	71753502	71753503	-	3	NA	exon (NM_001253862.1, exon 20 of 20)	chr9	71753460	71753612	WT_rep1_peak_9088	3.91918	18.9772	15.893
chr9	44548150	44548151	+	3	NA	exon (NM_001110826.1, exon 14 of 14)	chr9	44547728	44548864	WT_rep1_peak_8922	26.1809	1006.87	1002.13
chr16	84749857	84749858	-	3	NA	Intergenic NA NA NA chr16 84749591	84750024	WT_rep1_peak_3534	218	.	21.8436	391
chr7	7286621	7286622	-	3	NA	exon (NM_001302386.1, exon 11 of 11)	chr7	7286316	7287317	WT_rep1_peak_7651	16.0667	508.116	503.798
chr7	16296272	16296273	-	3	NA	exon (NM_172739.4, exon 2 of 7)	chr7	16295447	16297538	WT_rep1_peak_7675	5.21599	125.104	121.437
chr2	155939988	155939989	-	3	NA	exon (NM_029397.3, exon 3 of 3)	chr2	155938415	155940253	WT_rep1_peak_5280	6.47552	98.2338	94.6587
chr11	112934942	112934943	-	3	NA	exon (NR_015556.2, exon 3 of 3)	chr11	112934837	112935964	WT_rep1_peak_1644	9.32474	74.8043	71.3248
chr18	69816473	69816474	+	3	NA	exon (NM_001083967.1, exon 20 of 20)	chr18	69816057	69816752	WT_rep1_peak_4303	12.7762	719.341	714.823
chr6	126615924	126615925	-	3	NA	exon (NM_010595.3, exon 2 of 2)	chr6	126615639	126617298	WT_rep1_peak_7547	30.4286	887.561	882.909
chr18	58077232	58077233	+	3	NA	exon (NM_009194.3, exon 27 of 27)	chr18	58077055	58077391	WT_rep1_peak_4255	4.43218	21.9793	18.8593
chr5	67779806	67779807	-	3	NA	exon (NM_001038999.2, exon 37 of 37)	chr5	67779391	67779843	WT_rep1_peak_6770	22.8059	548.762	544.401
chr11	69514579	69514580	+	3	NA	exon (NM_001356468.1, exon 7 of 7)	chr11	69514460	69514613	WT_rep1_peak_1350	8.15612	60.1502	56.7447
chr18	88887391	88887392	-	3	NA	exon (NM_018821.5, exon 3 of 3)	chr18	88887181	88888129	WT_rep1_peak_4376	20.7569	252.678	248.709
chr13	67664588	67664589	-	3	NA	exon (NM_133228.3, exon 4 of 4)	chr13	67663988	67665287	WT_rep1_peak_2356	6.93669	45.5445	42.2235
chr6	120870711	120870712	-	3	NA	exon (NM_007544.4, exon 6 of 6)	chr6	120870574	120870719	WT_rep1_peak_7531	3.58326	13.2827	10.2711
chr8	120235225	120235226	-	3	NA	exon (NM_001167910.1, exon 23 of 23)	chr8	120235030	120235437	WT_rep1_peak_8685	7.81409	148.933	145.196
chrX	104166054	104166055	+	3	NA	exon (NM_053201.4, exon 1 of 1)	chrX	104165517	104166487	WT_rep1_peak_9506	11.8561	735.284	730.753
chr8	78322984	78322985	-	3	NA	exon (NM_001364445.1, exon 11 of 11)	chr8	78322971	78323768	WT_rep1_peak_8524	36.2798	717.85	713.333
chr13	19050835	19050836	+	3	NA	exon (NM_172120.4, exon 29 of 29)	chr13	19050507	19050842	WT_rep1_peak_2167	3.43771	30.2209	27.0184
chr6	117848011	117848012	+	3	NA	exon (NM_001001792.2, exon 4 of 4)	chr6	117847887	117848254	WT_rep1_peak_7500	9.32474	74.8043	71.3248
chr11	3594984	3594985	-	3	NA	exon (NR_002321.2, exon 3 of 4)	chr11	3594842	3595611	WT_rep1_peak_1086	18.848	318.896	314.815
chr9	50577107	50577108	-	3	NA	exon (NM_001311069.1, exon 20 of 20)	chr9	50576423	50577363	WT_rep1_peak_8960	33.1756	526.248	521.911
chr2	83710061	83710062	+	3	NA	exon (NM_175514.3, exon 8 of 8)	chr2	83709356	83710910	WT_rep1_peak_4970	13.1408	1344.8	1339.84
chr11	52012949	52012950	+	3	NA	exon (NM_019411.4, exon 7 of 7)	chr11	52012689	52013521	WT_rep1_peak_1241	3.12598	147.81	144.077
chr3	126717363	126717364	-	3	NA	exon (NM_001034168.1, exon 10 of 10)	chr3	126716522	126717696	WT_rep1_peak_5877	14.6232	2164.29	2158.97
chr12	84966701	84966702	-	3	NA	exon (NM_001364189.1, exon 20 of 20)	chr12	84965972	84967009	WT_rep1_peak_1950	22.0465	624.824	620.387
chr11	75068467	75068468	-	3	NA	exon (NM_027136.3, exon 2 of 2)	chr11	75068388	75069005	WT_rep1_peak_1391	7.19074	48.1948	44.8565
chr5	67779496	67779497	-	3	NA	exon (NM_001038999.2, exon 37 of 37)	chr5	67779391	67779843	WT_rep1_peak_6770	22.8059	548.762	544.401
chr13	99558561	99558562	-	3	NA	exon (NM_008634.2, exon 7 of 7)	chr13	99558172	99558762	WT_rep1_peak_2448	18.6816	2692.97	2687.45
chr2	14151229	14151230	+	3	NA	exon (NM_001356337.1, exon 13 of 13)	chr2	14151187	14151568	WT_rep1_peak_4699	6.47941	40.3758	37.0906
chr3	115821249	115821250	+	3	NA	exon (NM_001163514.1, exon 5 of 5)	chr3	115820703	115821861	WT_rep1_peak_5847	12.2988	277.937	273.924
chr18	54772203	54772204	+	3	NA	exon (NR_045400.1, exon 3 of 3)	chr18	54771992	54772329	WT_rep1_peak_4246	4.19298	18.3158	15.2352
chr12	91775720	91775721	-	3	NA	exon (NM_001039089.1, exon 21 of 21)	chr12	91775082	91776564	WT_rep1_peak_1989	25.87	991.174	986.445
chr6	133083357	133083358	+	3	NA	exon (NM_001163445.2, exon 1 of 1)	chr6	133082702	133084023	WT_rep1_peak_7564	19.5687	1136.34	1131.51
chr4	86495259	86495260	+	3	NA	exon (NM_178376.3, exon 1 of 1)	chr4	86494877	86495408	WT_rep1_peak_6180	4.87107	46.7915	43.4631
chr2	163295972	163295973	+	3	NA	exon (NM_144891.2, exon 6 of 6)	chr2	163295895	163296048	WT_rep1_peak_5320	8.47538	67.7786	64.3341
chr3	138608777	138608778	+	3	NA	exon (NM_019571.5, exon 8 of 8)	chr3	138608176	138609123	WT_rep1_peak_5904	41.1978	1735.69	1730.53
chr16	13764885	13764886	+	3	NA	exon (NM_001289561.1, exon 4 of 4)	chr16	13764746	13764899	WT_rep1_peak_3304	6.68264	42.9376	39.6335
chr11	62208300	62208301	-	3	NA	exon (NM_001252313.1, exon 45 of 45)	chr11	62208281	62208728	WT_rep1_peak_1325	16.9972	328.82	324.723
chr12	72259038	72259039	+	3	NA	exon (NM_001007596.2, exon 7 of 7)	chr12	72258826	72259181	WT_rep1_peak_1871	2.00191	51.0761	47.7216
chr2	118849111	118849112	-	3	NA	exon (NM_199310.2, exon 4 of 4)	chr2	118848920	118849651	WT_rep1_peak_5081	15.2515	339.969	335.855
chr17	35457232	35457233	+	3	NA	exon (NM_001347351.1, exon 4 of 4)	chr17	35456894	35457627	WT_rep1_peak_3810	2.91663	93.8301	90.2718
chr19	29003139	29003140	+	3	NA	exon (NM_001302380.2, exon 7 of 7)	chr19	29002324	29003386	WT_rep1_peak_4499	7.59722	53.6206	50.2501
chr9	21155251	21155252	-	3	NA	exon (NM_053190.2, exon 3 of 3)	chr9	21154678	21155370	WT_rep1_peak_8836	28.4291	393.698	389.511
chr5	66459486	66459487	-	3	NA	exon (NM_001201413.1, exon 17 of 17)	chr5	66459106	66459919	WT_rep1_peak_6765	22.586	284.207	280.184
chr9	45664616	45664617	+	3	NA	exon (NM_001081270.2, exon 33 of 33)	chr9	45664398	45664903	WT_rep1_peak_8936	12.0767	203.732	199.862
chr6	97209594	97209595	+	3	NA	exon (NM_022992.2, exon 3 of 3)	chr6	97209549	97209857	WT_rep1_peak_7443	4.58738	61.7525	58.3389
chrX	52644791	52644792	-	3	NA	exon (NM_024170.2, exon 1 of 1)	chrX	52644509	52644968	WT_rep1_peak_9408	13.0161	247.966	244.006
chr6	34135165	34135166	-	3	NA	exon (NM_021435.3, exon 10 of 10)	chr6	34133584	34135460	WT_rep1_peak_7243	19.6899	233.901	229.968
chr3	115821247	115821248	+	3	NA	exon (NM_001163514.1, exon 5 of 5)	chr3	115820703	115821861	WT_rep1_peak_5847	12.2988	277.937	273.924
chr11	75596493	75596494	+	3	NA	exon (NM_001277219.1, exon 3 of 3)	chr11	75596262	75596601	WT_rep1_peak_1400	12.0314	218.987	215.084
chr2	153253534	153253535	-	3	NA	exon (NM_001001986.2, exon 8 of 8)	chr2	153253174	153253795	WT_rep1_peak_5263	12.1221	121.985	118.329
chr10	52314670	52314671	+	3	NA	exon (NM_030250.2, exon 5 of 5)	chr10	52314551	52314701	WT_rep1_peak_770	3.7865	14.4893	11.4598
chr9	83479576	83479577	+	3	NA	exon (NM_172507.5, exon 4 of 4)	chr9	83479513	83479882	WT_rep1_peak_9136	7.24155	49.0877	45.7448
chr7	100488549	100488550	+	3	NA	exon (NM_001362169.1, exon 9 of 9)	chr7	100488380	100489165	WT_rep1_peak_8068	5.19921	62.0038	58.5891
chr15	39734666	39734667	-	3	NA	exon (NM_001347036.2, exon 6 of 6)	chr15	39734624	39734857	WT_rep1_peak_2948	5.66645	32.183	28.9616
chr4	45105461	45105462	-	3	NA	exon (NM_001099675.1, exon 2 of 2)	chr4	45105253	45105689	WT_rep1_peak_6096	6.47941	40.3758	37.0906
chr8	72076379	72076380	+	3	NA	exon (NM_146211.3, exon 12 of 12)	chr8	72076220	72076571	WT_rep1_peak_8499	4.31175	21.7265	18.6077
chr18	25612683	25612684	-	3	NA	exon (NM_001146292.2, exon 13 of 13)	chr18	25611766	25612853	WT_rep1_peak_4077	17.8002	1369.79	1364.82
chr9	46113627	46113628	+	3	NA	intron (XM_006510590.4, intron 14 of 23)	chr9	46113423	46113853	WT_rep1_peak_8942	18.9199	258.725	254.745
chr8	125070765	125070766	+	3	NA	exon (NM_139272.2, exon 16 of 16)	chr8	125070655	125070961	WT_rep1_peak_8746	11.1031	98.818	95.2407
chr19	29589655	29589656	-	2	NA	exon (NM_001081213.2, exon 15 of 15)	chr19	29589615	29590028	WT_rep1_peak_4505	8.91827	69.8243	66.3675
chr9	58784480	58784481	-	2	NA	exon (NM_001042752.1, exon 28 of 28)	chr9	58784092	58784640	WT_rep1_peak_9024	6.44445	57.6	54.2078
chr8	94682938	94682939	+	2	NA	exon (NM_001113384.1, exon 8 of 8)	chr8	94682762	94683249	WT_rep1_peak_8592	8.04877	110.146	106.528
chr18	24147138	24147139	-	2	NA	exon (NM_001357447.1, exon 4 of 4)	chr18	24146951	24147537	WT_rep1_peak_4070	51.7517	1024.04	1019.29
chr5	29437646	29437647	-	2	NA	exon (NM_020295.3, exon 17 of 17)	chr5	29437599	29437967	WT_rep1_peak_6631	9.88365	81.9265	78.4154
chr9	69286493	69286494	+	2	NA	exon (NM_001289916.1, exon 10 of 10)	chr9	69286069	69286708	WT_rep1_peak_9075	17.5051	197.37	193.513
chr15	87642250	87642251	+	2	NA	exon (NM_001252310.1, exon 4 of 4)	chr15	87641496	87642436	WT_rep1_peak_3139	20.6859	1671.86	1666.74
chr12	105803243	105803244	+	2	NA	exon (NM_001347440.1, exon 21 of 21)	chr12	105802950	105803511	WT_rep1_peak_2042	21.9689	295.512	291.47
chr5	29437670	29437671	-	2	NA	exon (NM_020295.3, exon 17 of 17)	chr5	29437599	29437967	WT_rep1_peak_6631	9.88365	81.9265	78.4154
chr8	13306369	13306370	-	2	NA	exon (NM_001024504.2, exon 7 of 7)	chr8	13306245	13306916	WT_rep1_peak_8305	111.17	2386.22	2380.82
chr2	180359904	180359905	+	2	NA	exon (NM_001289651.1, exon 5 of 5)	chr2	180359582	180360309	WT_rep1_peak_5427	9.39431	120.337	116.686
chr16	21471797	21471798	-	2	NA	exon (NM_001001881.2, exon 2 of 2)	chr16	21471696	21472589	WT_rep1_peak_3346	35.8286	543.533	539.178
chr19	8873377	8873378	+	2	NA	exon (NM_176843.3, exon 2 of 2)	chr19	8873341	8873488	WT_rep1_peak_4446	4.80269	23.8549	20.7118
chr13	19334449	19334450	+	2	NA	exon (NM_001289546.1, exon 21 of 21)	chr13	19333961	19334496	WT_rep1_peak_2168	11.4086	1190.32	1185.46
chr2	84432619	84432620	-	2	NA	exon (NM_001085448.1, exon 18 of 18)	chr2	84432447	84433168	WT_rep1_peak_4974	25.8378	343.776	339.657
chr16	43439267	43439268	+	2	NA	exon (NM_001285805.1, exon 11 of 11)	chr16	43438898	43440230	WT_rep1_peak_3452	20.5719	805.887	801.295
chr1	172197798	172197799	+	2	NA	exon (NM_001039484.1, exon 2 of 2)	chr1	172197671	172198401	WT_rep1_peak_533	22.5057	480.5	476.21
chr9	56845444	56845445	+	2	NA	exon (NM_133976.2, exon 1 of 1)	chr9	56845124	56845587	WT_rep1_peak_9006	20.198	241.908	237.959
chr1	33778753	33778754	+	2	NA	exon (NM_001159729.1, exon 8 of 8)	chr1	33778594	33779115	WT_rep1_peak_75	9.01989	70.8129	67.3519
chr9	103924694	103924695	-	2	NA	exon (NM_025692.3, exon 12 of 12)	chr9	103924247	103924916	WT_rep1_peak_9201	18.7753	218.072	214.171
chr16	91304093	91304094	+	2	NA	exon (NM_010508.2, exon 11 of 11)	chr16	91303922	91304124	WT_rep1_peak_3554	7.75993	102.821	99.2291
chr4	101010326	101010327	-	2	NA	exon (NM_013567.1, exon 23 of 23)	chr4	101010283	101010490	WT_rep1_peak_6210	7.86899	91.1884	87.6411
chr11	32694661	32694662	+	2	NA	exon (NM_001271347.1, exon 13 of 13)	chr11	32694643	32694956	WT_rep1_peak_1183	8.44361	86.4696	82.9408
chr15	57917967	57917968	-	2	NA	exon (NM_001042438.2, exon 4 of 5)	chr15	57917599	57918394	WT_rep1_peak_2982	13.857	149.46	145.722
chr2	125516403	125516404	+	2	NA	exon (NM_025613.3, exon 1 of 1)	chr2	125516264	125516414	WT_rep1_peak_5136	2.33982	13.5281	10.515
chr7	65699294	65699295	+	2	NA	exon (NM_001291184.1, exon 21 of 21)	chr7	65698931	65699311	WT_rep1_peak_7921	10.4934	90.2698	86.725
chr2	125581678	125581679	-	2	NA	exon (NM_001369056.1, exon 13 of 13)	chr2	125581452	125582652	WT_rep1_peak_5138	8.9921	688.716	684.225
chr2	125581914	125581915	-	2	NA	exon (NM_001369056.1, exon 13 of 13)	chr2	125581452	125582652	WT_rep1_peak_5138	8.9921	688.716	684.225
chr8	95507466	95507467	+	2	NA	exon (NM_009142.3, exon 3 of 3)	chr8	95507436	95507689	WT_rep1_peak_8600	6.58758	217.469	213.569
chr18	25612695	25612696	-	2	NA	exon (NM_001146292.2, exon 13 of 13)	chr18	25611766	25612853	WT_rep1_peak_4077	17.8002	1369.79	1364.82
chr3	152491341	152491342	+	2	NA	exon (NM_025662.5, exon 11 of 11)	chr3	152491085	152491370	WT_rep1_peak_5928	17.1783	220.844	216.937
chr16	84749832	84749833	-	2	NA	Intergenic NA NA NA chr16 84749591	84750024	WT_rep1_peak_3534	218	.	21.8436	391
chr6	86249186	86249187	+	2	NA	exon (NM_031199.5, exon 6 of 6)	chr6	86249019	86249297	WT_rep1_peak_7402	6.88588	44.6706	41.3547
chr8	94699594	94699595	-	2	NA	exon (NM_011787.2, exon 14 of 14)	chr8	94699273	94699702	WT_rep1_peak_8594	6.07586	88.8259	85.2881
chr6	13836734	13836735	-	2	NA	exon (NM_001330666.1, exon 4 of 4)	chr6	13835251	13837213	WT_rep1_peak_7191	8.71032	139.614	135.903
chr5	19408622	19408623	-	2	NA	exon (NR_102341.1, exon 4 of 4)	chr5	19408388	19408661	WT_rep1_peak_6580	9.17231	72.8013	69.331
chr15	87641908	87641909	+	2	NA	exon (NM_001252310.1, exon 4 of 4)	chr15	87641496	87642436	WT_rep1_peak_3139	20.6859	1671.86	1666.74
chr9	15649651	15649652	+	2	NA	exon (NM_001357565.1, exon 11 of 11)	chr9	15649467	15650043	WT_rep1_peak_8811	27.4638	374.441	370.281
chr14	14413904	14413905	-	2	NA	exon (NM_001331064.1, exon 9 of 9)	chr14	14413137	14414078	WT_rep1_peak_2532	27.9914	530.641	526.299
chr14	93253015	93253016	-	2	NA	exon (NM_001081377.3, exon 5 of 5)	chr14	93252627	93253045	WT_rep1_peak_2790	5.24791	28.7401	25.5509
chr13	34366238	34366239	-	2	NA	exon (NM_001033167.3, exon 11 of 11)	chr13	34365718	34367085	WT_rep1_peak_2208	24.0087	310.851	306.782
chr5	124478982	124478983	+	2	NA	exon (NM_001134717.2, exon 3 of 3)	chr5	124478644	124478992	WT_rep1_peak_7000	8.99448	80.751	77.2464
chr11	101864350	101864351	-	2	NA	exon (NM_028207.3, exon 3 of 3)	chr11	101864055	101864791	WT_rep1_peak_1579	29.6981	3078.87	3073.21
chr2	125582111	125582112	-	2	NA	exon (NM_001369056.1, exon 13 of 13)	chr2	125581452	125582652	WT_rep1_peak_5138	8.9921	688.716	684.225
chr18	25612559	25612560	-	2	NA	exon (NM_001146292.2, exon 13 of 13)	chr18	25611766	25612853	WT_rep1_peak_4077	17.8002	1369.79	1364.82
chr18	25612692	25612693	-	2	NA	exon (NM_001146292.2, exon 13 of 13)	chr18	25611766	25612853	WT_rep1_peak_4077	17.8002	1369.79	1364.82
chr17	51042881	51042882	-	2	NA	exon (NM_001285991.1, exon 23 of 23)	chr17	51042755	51042992	WT_rep1_peak_3885	5.00593	25.311	22.1528
chr4	10898301	10898302	+	2	NA	exon (NM_026005.3, exon 6 of 6)	chr4	10898021	10898482	WT_rep1_peak_5978	15.1678	158.69	154.926
chr15	72679887	72679888	-	2	NA	exon (NR_002864.2, exon 1 of 1)	chr15	72678304	72681373	WT_rep1_peak_3011	49.0728	2477.69	2472.26
chr7	80000067	80000068	-	2	NA	exon (NM_172903.4, exon 24 of 24)	chr7	79999747	80000536	WT_rep1_peak_7975	4.29765	72.4926	69.0244
chr16	17719808	17719809	-	2	NA	exon (NM_001081633.1, exon 10 of 10)	chr16	17719789	17720008	WT_rep1_peak_3325	11.6112	106.457	102.851
chr3	34123268	34123269	+	2	NA	exon (NM_001113188.1, exon 17 of 17)	chr3	34123054	34123295	WT_rep1_peak_5519	3.0708	12.0865	9.10178
chr9	96569399	96569400	-	2	NA	exon (NM_001359959.1, exon 3 of 3)	chr9	96569271	96569709	WT_rep1_peak_9172	8.54275	187.397	183.564
chr13	34366526	34366527	-	2	NA	exon (NM_001033167.3, exon 11 of 11)	chr13	34365718	34367085	WT_rep1_peak_2208	24.0087	310.851	306.782
chr12	84967003	84967004	-	2	NA	exon (NM_001364189.1, exon 20 of 20)	chr12	84965972	84967009	WT_rep1_peak_1950	22.0465	624.824	620.387
chr19	58226333	58226334	-	2	NA	exon (NM_001285457.2, exon 10 of 10)	chr19	58226289	58226871	WT_rep1_peak_4633	37.3208	572.041	567.656
chr11	76672943	76672944	-	2	NA	exon (NM_007754.2, exon 21 of 21)	chr11	76672474	76673203	WT_rep1_peak_1412	13.5327	223.448	219.536
chr17	31333338	31333339	+	2	NA	exon (NM_009593.2, exon 15 of 15)	chr17	31333123	31333450	WT_rep1_peak_3757	4.07419	60.9729	57.5645
chr6	67261059	67261060	+	2	NA	exon (NM_001113564.1, exon 8 of 8)	chr6	67260860	67261119	WT_rep1_peak_7341	7.6125	84.2335	80.7133
chr1	172199377	172199378	+	2	NA	exon (NM_001039484.1, exon 2 of 2)	chr1	172199037	172199626	WT_rep1_peak_534	35.8361	1152.66	1147.82
chr2	28120334	28120335	+	2	NA	exon (NM_001038613.1, exon 6 of 6)	chr2	28119102	28120657	WT_rep1_peak_4775	17.4866	2602.11	2596.63
chr1	21008440	21008441	+	2	NA	exon (NM_001355122.1, exon 3 of 3)	chr1	21008216	21008619	WT_rep1_peak_49	34.3333	972.363	967.649
chr11	109287104	109287105	+	2	NA	exon (NM_010303.3, exon 4 of 4)	chr11	109286699	109287379	WT_rep1_peak_1635	25.6346	340.885	336.77
chr4	26327959	26327960	-	2	NA	exon (NM_172865.2, exon 5 of 5)	chr4	26327674	26328123	WT_rep1_peak_6006	15.93	170.949	167.155
chr18	24147089	24147090	-	2	NA	exon (NM_001357447.1, exon 4 of 4)	chr18	24146951	24147537	WT_rep1_peak_4070	51.7517	1024.04	1019.29
chr10	78109430	78109431	-	2	NA	exon (NM_053014.3, exon 10 of 10)	chr10	78109245	78109981	WT_rep1_peak_864	8.31882	420.589	416.368
chr5	92202433	92202434	-	2	NA	exon (NM_001080794.2, exon 12 of 12)	chr5	92201982	92202903	WT_rep1_peak_6820	9.4688	393.893	389.706
chr11	94230513	94230514	+	2	NA	exon (NM_027799.2, exon 5 of 5)	chr11	94230323	94231274	WT_rep1_peak_1514	19.1842	794.594	790.011
chr18	84031209	84031210	-	2	NA	exon (NM_001081300.2, exon 2 of 2)	chr18	84031170	84031529	WT_rep1_peak_4363	18.064	206.368	202.492
chr9	58784272	58784273	-	2	NA	exon (NM_001042752.1, exon 28 of 28)	chr9	58784092	58784640	WT_rep1_peak_9024	6.44445	57.6	54.2078
chr1	106652461	106652462	-	2	NA	exon (NM_027534.2, exon 10 of 10)	chr1	106652381	106652779	WT_rep1_peak_315	9.93446	82.9578	79.443
chr2	125582102	125582103	-	2	NA	exon (NM_001369056.1, exon 13 of 13)	chr2	125581452	125582652	WT_rep1_peak_5138	8.9921	688.716	684.225
chr19	58226329	58226330	-	2	NA	exon (NM_001285457.2, exon 10 of 10)	chr19	58226289	58226871	WT_rep1_peak_4633	37.3208	572.041	567.656
chr18	25612669	25612670	-	2	NA	exon (NM_001146292.2, exon 13 of 13)	chr18	25611766	25612853	WT_rep1_peak_4077	17.8002	1369.79	1364.82
chr5	29437622	29437623	-	2	NA	exon (NM_020295.3, exon 17 of 17)	chr5	29437599	29437967	WT_rep1_peak_6631	9.88365	81.9265	78.4154
chrY	90749606	90749607	+	2	NA	Intergenic NA NA NA chrY 90748768	90750024	WT_rep1_peak_9606	244	.	24.4592	170
chr11	29171775	29171776	-	2	NA	exon (NM_025740.3, exon 10 of 10)	chr11	29171624	29172114	WT_rep1_peak_1160	23.0861	469.977	465.699
chr6	65680275	65680276	+	2	NA	exon (NM_172399.3, exon 4 of 4)	chr6	65680078	65680787	WT_rep1_peak_7337	6.88588	44.6706	41.3547
chr15	93398464	93398465	-	2	NA	exon (NM_001033217.5, exon 8 of 8)	chr15	93397786	93399315	WT_rep1_peak_3162	23.3984	791.233	786.652
chr15	72680247	72680248	-	2	NA	exon (NR_002864.2, exon 1 of 1)	chr15	72678304	72681373	WT_rep1_peak_3011	49.0728	2477.69	2472.26
chr19	29589633	29589634	-	2	NA	exon (NM_001081213.2, exon 15 of 15)	chr19	29589615	29590028	WT_rep1_peak_4505	8.91827	69.8243	66.3675
chr3	35949598	35949599	-	2	NA	exon (NM_001205361.1, exon 7 of 7)	chr3	35948988	35949868	WT_rep1_peak_5522	12.2209	114.237	110.605
chr7	130993878	130993879	-	2	NA	exon (NM_175115.4, exon 4 of 4)	chr7	130993609	130994259	WT_rep1_peak_8203	9.02698	117.569	113.927
chr6	116383137	116383138	+	2	NA	exon (NM_001302383.1, exon 8 of 8)	chr6	116382983	116383244	WT_rep1_peak_7495	9.37555	75.8112	72.3266
chr6	65681602	65681603	+	2	NA	exon (NM_172399.3, exon 4 of 4)	chr6	65681039	65681617	WT_rep1_peak_7338	18.0132	205.077	201.203
chr6	65681412	65681413	+	2	NA	exon (NM_172399.3, exon 4 of 4)	chr6	65681039	65681617	WT_rep1_peak_7338	18.0132	205.077	201.203
chr1	21006221	21006222	+	2	NA	exon (NM_001355122.1, exon 3 of 3)	chr1	21005540	21008076	WT_rep1_peak_49	34.3333	972.363	967.649
chr7	109907984	109907985	-	2	NA	exon (NM_177324.2, exon 41 of 41)	chr7	109907832	109908413	WT_rep1_peak_8102	28.1531	389.696	385.514
chr17	32992841	32992842	-	2	NA	exon (NM_001346705.1, exon 4 of 4)	chr17	32992343	32995018	WT_rep1_peak_3765	58.8133	1046.59	1041.82
chr7	55881013	55881014	+	2	NA	exon (NM_001360080.1, exon 93 of 93)	chr7	55880656	55881148	WT_rep1_peak_7868	21.2874	1080.12	1075.32
chr9	44548207	44548208	+	2	NA	exon (NM_001110826.1, exon 14 of 14)	chr9	44547728	44548864	WT_rep1_peak_8922	26.1809	1006.87	1002.13
chr1	33778771	33778772	+	2	NA	exon (NM_001159729.1, exon 8 of 8)	chr1	33778594	33779115	WT_rep1_peak_75	9.01989	70.8129	67.3519
chr3	152491316	152491317	+	2	NA	exon (NM_025662.5, exon 11 of 11)	chr3	152491085	152491370	WT_rep1_peak_5928	17.1783	220.844	216.937
chr7	130993855	130993856	-	2	NA	exon (NM_175115.4, exon 4 of 4)	chr7	130993609	130994259	WT_rep1_peak_8203	9.02698	117.569	113.927
chr5	37111505	37111506	+	2	NA	exon (NM_001360003.1, exon 9 of 9)	chr5	37111168	37111616	WT_rep1_peak_6677	5.21086	226.706	222.787
chr16	84749814	84749815	-	2	NA	Intergenic NA NA NA chr16 84749591	84750024	WT_rep1_peak_3534	218	.	21.8436	391
chr11	4843321	4843322	+	2	NA	exon (NM_008698.3, exon 10 of 10)	chr11	4843213	4843369	WT_rep1_peak_1096	2.91634	10.5653	7.60431
chr19	29589662	29589663	-	2	NA	exon (NM_001081213.2, exon 15 of 15)	chr19	29589615	29590028	WT_rep1_peak_4505	8.91827	69.8243	66.3675
chr5	105961986	105961987	+	2	NA	exon (NM_001122768.1, exon 3 of 3)	chr5	105961449	105962303	WT_rep1_peak_6867	19.9439	237.897	233.955
chr3	88619917	88619918	+	2	NA	exon (NM_028814.4, exon 14 of 14)	chr3	88619836	88620065	WT_rep1_peak_5680	19.133	525.744	521.408
chr15	72678890	72678891	-	2	NA	exon (NR_002864.2, exon 1 of 1)	chr15	72678304	72681373	WT_rep1_peak_3011	49.0728	2477.69	2472.26
chr3	129777089	129777090	-	2	NA	exon (NM_207209.3, exon 24 of 24)	chr3	129777026	129777575	WT_rep1_peak_5885	11.8364	142.085	138.367
chr4	75862988	75862989	-	2	NA	exon (NM_001352628.1, exon 31 of 31)	chr4	75862740	75863316	WT_rep1_peak_6163	50.3281	853.498	848.871
chr15	72678917	72678918	-	2	NA	exon (NR_002864.2, exon 1 of 1)	chr15	72678304	72681373	WT_rep1_peak_3011	49.0728	2477.69	2472.26
chr16	43439264	43439265	+	2	NA	exon (NM_001285805.1, exon 11 of 11)	chr16	43438898	43440230	WT_rep1_peak_3452	20.5719	805.887	801.295
chr1	135298957	135298958	-	2	NA	TTS (NM_175259.4) NA NA NA chr1	135298826	135299074	WT_rep1_peak_400	56	8.61121	5.69263	133
chr3	33004571	33004572	-	2	NA	exon (NM_001163516.3, exon 13 of 13)	chr3	33004281	33005119	WT_rep1_peak_5514	24.9084	1084.53	1079.74
chr16	35854642	35854643	+	2	NA	exon (NM_008465.5, exon 14 of 14)	chr16	35854476	35854685	WT_rep1_peak_3401	11.9278	207.171	203.294
chr6	65681492	65681493	+	2	NA	exon (NM_172399.3, exon 4 of 4)	chr6	65681039	65681617	WT_rep1_peak_7338	18.0132	205.077	201.203
chr1	34346896	34346897	+	2	NA	exon (NM_001276764.1, exon 103 of 103)	chr1	34346723	34347061	WT_rep1_peak_83	3.54868	22.8779	19.7477
chr11	59089406	59089407	-	2	NA	exon (NR_037964.1, exon 3 of 3)	chr11	59089354	59089568	WT_rep1_peak_1289	2.77031	7.34946	4.45702
chr19	29787420	29787421	-	2	NA	exon (NM_177721.4, exon 1 of 1)	chr19	29786979	29788724	WT_rep1_peak_4510	18.968	239.112	235.169
chr17	6187746	6187747	+	2	NA	exon (XM_006523248.4, exon 2 of 16)	chr17	6187607	6188171	WT_rep1_peak_3611	38.4652	2609.46	2603.97
chr2	97460418	97460419	+	2	NA	exon (NM_001289742.1, exon 8 of 8)	chr2	97459705	97461571	WT_rep1_peak_5012	73.4486	1405.73	1400.74
chr10	22581604	22581605	-	2	NA	exon (NM_011603.5, exon 7 of 7)	chr10	22581467	22581696	WT_rep1_peak_691	8.10531	59.2048	55.8037
chr9	21659960	21659961	+	2	NA	exon (NM_001252658.1, exon 17 of 17)	chr9	21659923	21660094	WT_rep1_peak_8842	5.10755	26.0491	22.8824
chr15	72679011	72679012	-	2	NA	exon (NR_002864.2, exon 1 of 1)	chr15	72678304	72681373	WT_rep1_peak_3011	49.0728	2477.69	2472.26
chr4	75863013	75863014	-	2	NA	exon (NM_001352628.1, exon 31 of 31)	chr4	75862740	75863316	WT_rep1_peak_6163	50.3281	853.498	848.871
chr1	42738230	42738231	+	2	NA	exon (NM_008900.3, exon 1 of 1)	chr1	42737913	42739316	WT_rep1_peak_139	54.9571	5007.06	5001.02
chr2	121135177	121135178	+	2	NA	exon (NM_001173506.1, exon 4 of 6)	chr2	121133761	121135631	WT_rep1_peak_5120	9.91571	3471.91	3466.14
chr15	72680066	72680067	-	2	NA	exon (NR_002864.2, exon 1 of 1)	chr15	72678304	72681373	WT_rep1_peak_3011	49.0728	2477.69	2472.26
chr10	69860240	69860241	+	2	NA	exon (NM_009670.4, exon 20 of 20)	chr10	69859778	69860560	WT_rep1_peak_830	9.26756	320.85	316.766
chr13	112641442	112641443	+	2	NA	exon (NM_010560.3, exon 17 of 17)	chr13	112640642	112642188	WT_rep1_peak_2491	28.3275	390.722	386.539
chr5	115235891	115235892	+	2	NA	exon (NM_029012.2, exon 11 of 11)	chr5	115235269	115236137	WT_rep1_peak_6932	27.414	2053.55	2048.27
chr14	20366599	20366600	+	2	NA	exon (NM_001359868.1, exon 10 of 10)	chr14	20366345	20366622	WT_rep1_peak_2534	15.0154	156.264	152.507
chr8	111884208	111884209	-	2	NA	exon (NM_001368315.1, exon 26 of 26)	chr8	111883750	111884485	WT_rep1_peak_8666	34.3609	1168.82	1163.97
chr9	50577264	50577265	-	2	NA	exon (NM_001311069.1, exon 20 of 20)	chr9	50576423	50577363	WT_rep1_peak_8960	33.1756	526.248	521.911
chr12	35194236	35194237	+	2	NA	exon (NM_001014973.2, exon 26 of 26)	chr12	35194108	35194578	WT_rep1_peak_1784	13.9484	140.721	137.006
chr10	69860322	69860323	+	2	NA	exon (NM_009670.4, exon 20 of 20)	chr10	69859778	69860560	WT_rep1_peak_830	9.26756	320.85	316.766
chr15	57734968	57734969	-	2	NA	exon (NM_024207.4, exon 8 of 8)	chr15	57734578	57735090	WT_rep1_peak_2979	9.88365	81.9265	78.4154
