# Supplementary material for: Single-cell discovery of m6A RNA modifications in the hippocampus
Source: Genome Res. 2024 Jun;34(6):822–36. doi: 10.1101/gr.278424.123 (PMC11293556; doi:10.1101/gr.278424.123)
Supplement: Supplement 18 [file Supplemental_Table_S8.xlsx]

## Sheet: Table S8
Quality Control of single cell sequencing
Samples profling	YTH	YTHmut
Cells loading to the nano-well chip	30000	23000
Cells analyzed after filtering	11561	16243
Mean number of mapped reads per cell by animal	35717	18173.5
Mean number of UMI counts detected per cell by animal	8769.13	6731.33
Mean number of genes detected per cell by animal	2800.06	2373.87
Percent of sequencing saturation by animal	93.35	86.28
