# Supplementary material for: Single-cell discovery of m6A RNA modifications in the hippocampus
Source: Genome Res. 2024 Jun;34(6):822–36. doi: 10.1101/gr.278424.123 (PMC11293556; doi:10.1101/gr.278424.123)
Supplement: Supplement 19 [file Supplemental_Table_S9.xlsx]

## Sheet: Table S9
m6A sites information in each cluster
Cluster	Cell type	Number of cells	Total variants	Average of variants
0	IMC	1475	91640	62.1288
1	IMC	1006	77423	76.9612
2	OLG lineage	1415	124983	88.3272
3	OLG lineage	1280	108794	84.9953
4	IMC	345	21383	61.9797
5	OLG lineage	1178	116812	99.1613
6	OLG lineage	950	120245	126.574
7	OLG lineage	831	97428	117.242
8	IMC	313	6382	20.3898
9	IMC	379	22477	59.3061
10	IMC	238	18361	77.1471
11	NEUR	232	28112	121.172
12	OLG lineage	106	14971	141.236
13	OLG lineage	194	28447	146.634
14	IMC	131	6205	47.3664
15	IMC	267	15078	56.4719
16	OLG lineage	18	1025	56.9444
17	IMC	89	3752	42.1573
18	IMC	66	1204	18.2424
19	IMC	39	3040	77.9487
20	IMC	9	852	94.6667
21	IMC	63	2252	35.746
22	ASC	43	7667	178.302
24	IMC	16	1203	75.1875
25	IMC	27	1284	47.5556
26	EC	23	595	25.8696
27	IMC	24	1634	68.0833
	Total cell number	10757	923249
