# Supplementary material for: Single-cell discovery of m6A RNA modifications in the hippocampus
Source: Genome Res. 2024 Jun;34(6):822–36. doi: 10.1101/gr.278424.123 (PMC11293556; doi:10.1101/gr.278424.123)
Supplement: Supplement 20 [file Supplemental_Table_S10.xlsx]

## Sheet: Read me
Differential expression of genes in different clusters from single cell data
Sheet name	Legend	Terms
Supplemental_Table_S10_1	Differential expression of genes in different clusters from single cell data. Average log fold change describes the log fold change difference in expression of that gene in that cluster versus all other clusters. The larger the log fold change is, the more specific the gene expression is for the correspoinding cluster.	p_val: p-value avg_logFC: Average log(Fold change) between two groups. pct.1: The percentage of cells in the E-YTH that detected this feature. pct.2: The percentage of cells in the E-YTHmut that detected this feature. p_val_adj: Adjust p-values ​​based on Bonferroni correction using all features in the dataset. max_pval: The p-value of the maximum p-value calculated for each group minimump_p_val:…
Supplemental_Table_S10_2	Genes that are present in cluster 23 but absent from all other clusters.

## Sheet: Supplemental_Table_S10_1
Cluster_id	Gene	E-YTH_p_val	E-YTH_avg_logFC	E-YTH_pct.1	E-YTH_pct.2	E-YTH__p_val_adj	E-YTHmut_p_val	E-YTHmut_avg_logFC	E-YTHmut_pct.1	E-YTHmut_pct.2	E-YTHmut_p_val_adj	max_pval	minimump_p_val
0	Lyz2	0	2.9901	0.999	0.712	0	0	2.73499	0.994	0.554	0	0	0
0	Tgfbi	0	2.51497	0.972	0.143	0	0	2.62465	0.976	0.155	0	0	0
0	Gpnmb	0	2.41002	0.839	0.23	0	0	2.22742	0.536	0.109	0	0	0
0	Cybb	0	2.30275	0.996	0.266	0	0	1.85805	0.962	0.358	0	0	0
0	Ly6i	0	2.27076	0.857	0.238	0	0	2.01525	0.746	0.218	0	0	0
0	Ms4a7	0	2.24576	0.962	0.146	0	0	2.25575	0.891	0.078	0	0	0
0	Ms4a6c	0	1.99435	0.988	0.222	0	0	2.04242	0.968	0.302	0	0	0
0	Vim	0	1.78784	0.983	0.383	0	0	1.6688	0.949	0.345	0	0	0
0	Cxcr4	0	1.74458	0.953	0.23	0	0	1.78947	0.947	0.268	0	0	0
0	Apoe	0	1.70858	0.999	0.966	0	0	1.82257	0.987	0.819	0	0	0
0	Lgals3	0	1.68232	0.894	0.18	0	0	2.07783	0.948	0.233	0	0	0
0	H2-Ab1	0	1.64698	0.991	0.75	0	0	1.35877	0.962	0.736	0	0	0
0	Ly6c2	0	1.5434	0.564	0.089	0	0	1.93251	0.853	0.174	0	0	0
0	Cd74	0	1.48698	0.997	0.714	0	0	1.18264	0.971	0.691	0	0	0
0	H2-Aa	0	1.46853	0.994	0.751	0	0	1.22538	0.962	0.702	0	0	0
0	C3	0	1.45187	0.894	0.221	0	0	1.13821	0.699	0.226	0	0	0
0	Cd93	0	1.43783	0.762	0.043	0	0	1.27639	0.595	0.031	0	0	0
0	Pla2g7	0	1.43464	0.833	0.095	0	0	1.07009	0.544	0.048	0	0	0
0	Ms4a6d	0	1.4246	0.924	0.188	0	0	1.23721	0.8	0.215	0	0	0
0	H2-Eb1	0	1.41772	0.974	0.522	0	0	1.16583	0.93	0.585	0	0	0
0	Psap	0	1.41212	1	0.979	0	0	0.712143	0.997	0.961	0	0	0
0	Mgst1	0	1.39716	0.748	0.079	0	0	0.879276	0.425	0.023	0	0	0
0	Fcer1g	0	1.37165	0.999	0.457	0	0	0.760331	0.999	0.613	0	0	0
0	Cd68	0	1.35053	0.982	0.337	0	0	0.937823	0.946	0.5	0	0	0
0	Rgs2	0	1.34223	0.904	0.329	0	0	1.32306	0.917	0.522	0	0	0
0	Ifitm3	0	1.33749	0.942	0.366	0	0	1.20235	0.977	0.576	0	0	0
0	Slamf7	0	1.31005	0.952	0.211	0	0	1.30958	0.904	0.211	0	0	0
0	Sirpb1c	0	1.29391	0.728	0.024	0	0	1.31721	0.665	0.026	0	0	0
0	C3ar1	0	1.27956	0.913	0.229	0	0	0.962857	0.844	0.369	0	0	0
0	Dusp1	0	1.2764	0.886	0.513	0	0	1.30675	0.935	0.625	0	0	0
0	ENSMUSG00000120878	0	1.27502	0.634	0.059	0	0	1.36481	0.593	0.041	0	0	0
0	Sdcbp	0	1.27296	0.986	0.666	0	0	1.01335	0.96	0.703	0	0	0
0	Thbs1	0	1.2523	0.391	0.059	0	0	2.24032	0.559	0.161	0	0	0
0	Mmp14	0	1.25201	0.833	0.11	0	0	1.2037	0.776	0.187	0	0	0
0	Ccrl2	0	1.25068	0.67	0.195	0	0	0.936986	0.797	0.419	0	0	0
0	Ctsc	0	1.25025	0.985	0.378	0	0	0.809709	0.967	0.576	0	0	0
0	Gm36161	0	1.24532	0.658	0.052	0	0	1.4301	0.742	0.054	0	0	0
0	Cxcl16	0	1.23896	0.954	0.306	0	0	1.0068	0.936	0.467	0	0	0
0	Dusp6	0	1.23435	0.851	0.266	0	0	1.06189	0.72	0.319	0	0	0
0	Ctss	0	1.22095	1	0.746	0	1.26926e-213	0.424921	1	0.81	5.02906e-209	1.26926e-213	0
0	Mafb	0	1.22062	0.921	0.264	0	0	0.942356	0.849	0.41	0	0	0
0	Lilrb4b	0	1.21322	0.806	0.151	0	0	1.20993	0.769	0.176	0	0	0
0	Smpdl3a	0	1.20751	0.829	0.199	0	0	0.74935	0.575	0.19	0	0	0
0	Clec7a	0	1.207	0.922	0.281	0	0	1.17372	0.868	0.387	0	0	0
0	Axl	0	1.20179	0.927	0.253	0	0	0.918086	0.931	0.468	0	0	0
0	Calhm6	0	1.20071	0.765	0.153	0	0	1.37002	0.718	0.175	0	0	0
0	Ctsh	0	1.19247	0.976	0.33	0	0	0.684185	0.944	0.528	0	0	0
0	Clec4d	0	1.18868	0.563	0.027	0	0	0.676515	0.285	0.011	0	0	0
0	Tnfaip2	0	1.17643	0.716	0.122	0	0	0.713783	0.528	0.212	0	0	0
0	Klf4	0	1.16109	0.622	0.14	0	0	1.30566	0.741	0.246	0	0	0
0	Mpeg1	0	1.1608	0.994	0.363	0	3.10912e-214	0.365254	0.959	0.541	1.23189e-209	3.10912e-214	0
0	Atf3	0	1.15837	0.8	0.284	0	0	1.05262	0.866	0.473	0	0	0
0	Gda	0	1.14703	0.593	0.019	0	0	0.509591	0.241	0.015	0	0	0
0	Igsf6	0	1.1412	0.844	0.162	0	0	0.706235	0.568	0.183	0	0	0
0	Ly6a	0	1.13972	0.872	0.32	0	0	0.795336	0.872	0.513	0	0	0
0	Klra2	0	1.13815	0.623	0.039	0	0	1.19033	0.535	0.028	0	0	0
0	Cebpb	0	1.13527	0.866	0.414	0	0	0.928335	0.781	0.371	0	0	0
0	Il18bp	0	1.13238	0.811	0.332	0	0	1.00475	0.683	0.308	0	0	0
0	Fcgr2b	0	1.13001	0.948	0.264	0	0	0.498433	0.868	0.451	0	0	0
0	Soat1	0	1.12623	0.921	0.372	0	0	0.780128	0.806	0.449	0	0	0
0	Myof	0	1.12168	0.711	0.084	0	0	0.997899	0.567	0.044	0	0	0
0	Alox5ap	0	1.1033	0.888	0.233	0	0	0.735195	0.856	0.441	0	0	0
0	AW112010	0	1.10088	0.948	0.353	0	0	0.792249	0.872	0.458	0	0	0
0	Fyb	0	1.09477	0.98	0.327	0	0	0.760131	0.945	0.538	0	0	0
0	Zfp36	0	1.07509	0.971	0.72	0	0	0.898749	0.971	0.793	0	0	0
0	Ifi203	0	1.07443	0.849	0.161	0	0	0.886089	0.786	0.194	0	0	0
0	Ly6e	0	1.07325	0.993	0.483	0	0	0.638853	0.997	0.734	0	0	0
0	Tyrobp	0	1.06281	0.993	0.405	0	2.02591e-262	0.428185	0.995	0.606	8.02707e-258	2.02591e-262	0
0	Fos	0	1.0579	0.953	0.773	0	0	1.02534	0.97	0.79	0	0	0
0	Clec12a	0	1.05453	0.734	0.084	0	0	1.18327	0.706	0.079	0	0	0
0	Adgre1	0	1.04246	0.887	0.229	0	0	0.601329	0.749	0.402	0	0	0
0	Cyba	0	1.03832	0.911	0.312	0	0	0.737961	0.824	0.438	0	0	0
0	Tmem176b	0	1.0369	0.812	0.266	0	7.84538e-222	0.56027	0.639	0.38	3.1085e-217	7.84538e-222	0
0	Csf2ra	0	1.03582	0.953	0.444	0	0	0.839182	0.949	0.568	0	0	0
0	Ifi207	0	1.02845	0.841	0.203	0	0	1.01264	0.796	0.299	0	0	0
0	Ms4a4c	0	1.02604	0.58	0.101	0	0	1.42941	0.792	0.188	0	0	0
0	Slfn4	0	1.02534	0.346	0.025	0	0	1.78538	0.517	0.042	0	0	0
0	Slfn5	0	1.016	0.894	0.31	0	0	0.861939	0.85	0.405	0	0	0
0	Cd300a	0	1.01183	0.759	0.149	0	0	0.811569	0.601	0.196	0	0	0
0	Wfdc17	0	1.00912	0.63	0.095	0	0	1.12055	0.536	0.074	0	0	0
0	Cd14	0	1.00909	0.672	0.191	0	0	0.686545	0.758	0.377	0	0	0
0	Apobec1	0	1.0027	0.801	0.189	0	0	1.0791	0.783	0.262	0	0	0
0	Glipr1	0	0.991624	0.729	0.146	0	9.29269e-305	0.596023	0.507	0.214	3.68195e-300	9.29269e-305	0
0	Sat1	0	0.990631	0.993	0.736	0	0	0.64414	0.985	0.748	0	0	0
0	Cstb	0	0.990084	0.934	0.794	0	0	1.17187	0.913	0.687	0	0	0
0	Mndal	0	0.989417	0.897	0.177	0	0	0.907819	0.855	0.219	0	0	0
0	Ifi204	0	0.986984	0.854	0.253	0	0	0.867798	0.847	0.424	0	0	0
0	Rab32	0	0.985837	0.833	0.231	0	0	0.658203	0.692	0.326	0	0	0
0	Cd84	0	0.985155	0.902	0.249	0	4.07544e-275	0.497949	0.683	0.37	1.61477e-270	4.07544e-275	0
0	Lipa	0	0.982895	0.882	0.567	0	0	0.71024	0.734	0.51	0	0	0
0	Ifi30	0	0.979221	0.939	0.357	0	0	0.897256	0.952	0.526	0	0	0
0	Iqgap1	0	0.978984	0.878	0.284	0	0	0.810619	0.786	0.292	0	0	0
0	Pnp	0	0.9558	0.844	0.377	0	0	0.965899	0.823	0.446	0	0	0
0	Zfp36l2	0	0.953811	0.901	0.491	0	0	0.845129	0.87	0.589	0	0	0
0	Npc2	0	0.946282	0.998	0.831	0	0	0.774262	0.986	0.825	0	0	0
0	Asah1	0	0.933165	0.942	0.572	0	1.09845e-199	0.39206	0.822	0.612	4.35229e-195	1.09845e-199	0
0	Ctsz	0	0.930445	0.967	0.458	0	6.58597e-209	0.320123	0.893	0.558	2.60949e-204	6.58597e-209	0
0	Prdx5	0	0.927239	0.878	0.543	0	0	0.943781	0.831	0.518	0	0	0
0	Tgfbr1	0	0.923223	0.896	0.391	0	3.06245e-246	0.429136	0.849	0.531	1.2134e-241	3.06245e-246	0
0	Ptafr	0	0.919132	0.718	0.216	0	0	0.791354	0.687	0.361	0	0	0
0	Clec4e	0	0.911593	0.237	0.01	0	0	0.94151	0.259	0.013	0	0	0
0	Tnfrsf1b	0	0.908677	0.796	0.256	0	1.02894e-230	0.474749	0.667	0.394	4.07685e-226	1.02894e-230	0
0	Prkcd	0	0.907111	0.868	0.273	0	5.29788e-220	0.449173	0.734	0.443	2.09913e-215	5.29788e-220	0
0	Nfe2l2	0	0.903451	0.897	0.585	0	0	0.689146	0.86	0.561	0	0	0
0	Hpse	0	0.902317	0.725	0.159	0	0	0.528726	0.412	0.113	0	0	0
0	Gvin-ps7	0	0.898267	0.906	0.285	0	0	0.7487	0.863	0.479	0	0	0
0	Msr1	0	0.897826	0.555	0.075	0	0	0.909704	0.458	0.039	0	0	0
0	F13a1	0	0.897599	0.455	0.038	0	0	0.484649	0.238	0.018	0	0	0
0	Il10rb	0	0.896503	0.864	0.256	0	0	0.546405	0.661	0.345	0	0	0
0	AB124611	0	0.894535	0.72	0.149	0	0	0.889401	0.657	0.177	0	0	0
0	Fgl2	0	0.893388	0.904	0.365	0	1.85713e-223	0.506195	0.806	0.517	7.35834e-219	1.85713e-223	0
0	Ccr5	0	0.888181	0.752	0.229	0	1.52879e-221	0.455892	0.79	0.473	6.05737e-217	1.52879e-221	0
0	Adam17	0	0.8859	0.895	0.559	0	0	0.607432	0.787	0.566	0	0	0
0	Pim1	0	0.884705	0.802	0.289	0	0	1.01853	0.905	0.469	0	0	0
0	Fxyd5	0	0.883182	0.797	0.189	0	0	0.773532	0.801	0.284	0	0	0
0	Tgif1	0	0.881881	0.821	0.268	0	0	0.681771	0.856	0.475	0	0	0
0	Rbms1	0	0.876406	0.825	0.277	0	0	0.662532	0.742	0.343	0	0	0
0	Mdfic	0	0.873562	0.703	0.133	0	0	0.76357	0.54	0.101	0	0	0
0	Unc93b1	0	0.862805	0.915	0.37	0	4.83658e-271	0.417671	0.921	0.561	1.91635e-266	4.83658e-271	0
0	Aif1	0	0.859159	0.93	0.287	0	0	0.518222	0.962	0.531	0	0	0
0	Tlr2	0	0.855188	0.734	0.182	0	0	0.662825	0.782	0.363	0	0	0
0	Ctsb	0	0.854569	0.998	0.979	0	2.36392e-158	0.331226	0.994	0.958	9.36631e-154	2.36392e-158	0
0	Snx5	0	0.854568	0.965	0.755	0	0	0.584907	0.93	0.75	0	0	0
0	Abca1	0	0.85439	0.915	0.648	0	1.90389e-84	0.301124	0.674	0.525	7.54359e-80	1.90389e-84	0
0	Iqgap2	0	0.85154	0.616	0.063	0	0	0.486282	0.354	0.073	0	0	0
0	Rps20	0	0.849708	0.998	0.904	0	1.70414e-303	0.411043	0.992	0.921	6.75214e-299	1.70414e-303	0
0	Anxa5	0	0.848159	0.927	0.622	0	0	0.955487	0.846	0.432	0	0	0
0	Ms4a6b	0	0.846788	0.772	0.171	0	0	0.728143	0.723	0.234	0	0	0
0	Gpr65	0	0.845263	0.732	0.215	0	0	0.818211	0.709	0.335	0	0	0
0	Rpl31	0	0.844951	0.997	0.923	0	0	0.477043	0.99	0.944	0	0	0
0	Ucp2	0	0.84474	0.927	0.369	0	0	0.702578	0.974	0.64	0	0	0
0	Plxna1	0	0.843355	0.607	0.154	0	0	0.559131	0.345	0.079	0	0	0
0	Cd300lf	0	0.839901	0.675	0.133	0	0	0.773577	0.622	0.215	0	0	0
0	Aoah	0	0.832986	0.656	0.091	0	0	0.575302	0.374	0.063	0	0	0
0	Lat2	0	0.829821	0.721	0.202	0	4.01559e-303	0.534426	0.745	0.406	1.59106e-298	4.01559e-303	0
0	Rps29	0	0.827458	1	0.973	0	0	0.43052	0.999	0.965	0	0	0
0	Cmklr1	0	0.826235	0.72	0.165	0	0	0.609668	0.665	0.303	0	0	0
0	Hck	0	0.818706	0.753	0.207	0	0	0.574897	0.721	0.379	0	0	0
0	Gpx1	0	0.818258	0.832	0.393	0	0	0.645581	0.835	0.555	0	0	0
0	Rps4x	0	0.816507	0.989	0.93	0	6.03827e-237	0.35024	0.97	0.937	2.39248e-232	6.03827e-237	0
0	Arhgdib	0	0.810556	0.843	0.264	0	0	0.591111	0.902	0.541	0	0	0
0	Gngt2	0	0.810434	0.669	0.138	0	0	0.736864	0.66	0.289	0	0	0
0	Rpl23	0	0.800288	0.998	0.958	0	0	0.418699	0.993	0.968	0	0	0
0	Rps28	0	0.799796	0.986	0.782	0	0	0.470186	0.981	0.872	0	0	0
0	Zfp36l1	0	0.799315	0.965	0.426	0	8.8075e-181	0.397604	0.871	0.615	3.48971e-176	8.8075e-181	0
0	Rap2b	0	0.798931	0.801	0.304	0	0	0.677788	0.642	0.288	0	0	0
0	Bst2	0	0.796669	0.924	0.625	0	0	0.614356	0.856	0.618	0	0	0
0	Rpl35a	0	0.791646	0.995	0.918	0	5.43662e-225	0.342895	0.986	0.939	2.1541e-220	5.43662e-225	0
0	Ifi213	0	0.785134	0.647	0.163	0	0	0.665573	0.579	0.245	0	0	0
0	Acp2	0	0.782407	0.86	0.512	0	6.58616e-137	0.399903	0.678	0.521	2.60957e-132	6.58616e-137	0
0	Cebpa	0	0.778749	0.648	0.151	0	0	0.665985	0.545	0.227	0	0	0
0	Dhrs3	0	0.77632	0.723	0.217	0	2.30429e-286	0.597041	0.579	0.291	9.13006e-282	2.30429e-286	0
0	Rpl5	0	0.775682	0.993	0.968	0	9.98956e-223	0.315231	0.979	0.965	3.95806e-218	9.98956e-223	0
0	Myo1f	0	0.775104	0.824	0.245	0	5.07379e-250	0.47189	0.652	0.367	2.01034e-245	5.07379e-250	0
0	AI504432	0	0.77392	0.645	0.205	0	0	0.998847	0.679	0.201	0	0	0
0	Rps12	0	0.773757	0.995	0.9	0	4.13857e-245	0.354113	0.991	0.945	1.63978e-240	4.13857e-245	0
0	Slc25a37	0	0.773743	0.567	0.159	0	6.90807e-136	0.457985	0.355	0.184	2.73712e-131	6.90807e-136	0
0	Cd48	0	0.766859	0.803	0.256	0	1.35263e-195	0.414164	0.613	0.359	5.35938e-191	1.35263e-195	0
0	Esyt1	0	0.764533	0.677	0.182	0	0	0.724938	0.633	0.22	0	0	0
0	Tmem86a	0	0.764496	0.736	0.215	0	1.61427e-258	0.5268	0.655	0.363	6.39604e-254	1.61427e-258	0
0	Il2rg	0	0.757969	0.837	0.274	0	4.62511e-246	0.372159	0.802	0.468	1.83256e-241	4.62511e-246	0
0	Cers6	0	0.749243	0.637	0.144	0	0	0.598477	0.475	0.165	0	0	0
0	Tpt1	0	0.747416	1	0.999	0	0	0.48815	0.995	0.996	0	0	0
0	Cd44	0	0.744581	0.624	0.146	0	2.10337e-258	0.438747	0.429	0.163	8.33396e-254	2.10337e-258	0
0	Il6ra	0	0.740473	0.77	0.212	0	2.60938e-150	0.3075	0.665	0.396	1.03389e-145	2.60938e-150	0
0	Tmem106a	0	0.737705	0.683	0.178	0	0	0.752131	0.601	0.19	0	0	0
0	Tgm2	0	0.730391	0.517	0.107	0	9.05635e-227	0.650368	0.453	0.21	3.58831e-222	9.05635e-227	0
0	Msn	0	0.727215	0.929	0.575	0	3.95069e-200	0.381399	0.854	0.643	1.56534e-195	3.95069e-200	0
0	Arl4c	0	0.726577	0.856	0.328	0	4.03729e-297	0.56803	0.86	0.54	1.59966e-292	4.03729e-297	0
0	Ly9	0	0.726418	0.725	0.191	0	6.2751e-149	0.316462	0.562	0.316	2.48632e-144	6.2751e-149	0
0	Dram1	0	0.719469	0.514	0.083	0	0	0.49793	0.307	0.044	0	0	0
0	Rps9	0	0.718636	0.984	0.819	0	1.48075e-237	0.360591	0.987	0.953	5.86701e-233	1.48075e-237	0
0	Anpep	0	0.715119	0.42	0.044	0	4.51411e-183	0.351123	0.178	0.039	1.78858e-178	4.51411e-183	0
0	Rps23	0	0.714113	0.978	0.797	0	0	0.425071	0.964	0.872	0	0	0
0	Ifi209	0	0.71136	0.742	0.25	0	0	0.63685	0.695	0.356	0	0	0
0	Rps25	0	0.710823	0.997	0.945	0	4.25117e-237	0.336352	0.986	0.95	1.6844e-232	4.25117e-237	0
0	Nrros	0	0.7071	0.715	0.225	0	2.85463e-146	0.344926	0.605	0.367	1.13106e-141	2.85463e-146	0
0	Scpep1	0	0.706133	0.934	0.544	0	4.44855e-235	0.422368	0.804	0.542	1.7626e-230	4.44855e-235	0
0	Rplp1	0	0.699972	0.984	0.807	0	4.34128e-178	0.324082	0.94	0.82	1.7201e-173	4.34128e-178	0
0	Cd52	0	0.697186	0.889	0.319	0	4.55955e-218	0.361814	0.931	0.598	1.80658e-213	4.55955e-218	0
0	Themis2	0	0.686408	0.645	0.184	0	0	0.602927	0.666	0.339	0	0	0
0	Plbd1	0	0.686233	0.572	0.063	0	0	0.749827	0.633	0.092	0	0	0
0	Pltp	0	0.685806	0.48	0.081	0	0	1.16456	0.548	0.07	0	0	0
0	Rpl32	0	0.685403	0.974	0.714	0	6.13792e-224	0.334501	0.98	0.854	2.43197e-219	6.13792e-224	0
0	Neurl3	0	0.684938	0.662	0.183	0	0	0.691789	0.78	0.4	0	0	0
0	Clec4a1	0	0.678338	0.378	0.05	0	0	0.481955	0.231	0.028	0	0	0
0	Rpl17	0	0.675207	0.994	0.895	0	2.52362e-244	0.310199	0.991	0.965	9.9991e-240	2.52362e-244	0
0	Acp5	0	0.672606	0.406	0.025	0	0	0.319066	0.176	0.015	0	0	0
0	Plxnc1	0	0.671242	0.673	0.134	0	0	0.455781	0.425	0.111	0	0	0
0	Ifi206	0	0.669876	0.583	0.157	0	0	0.549023	0.554	0.234	0	0	0
0	Rps17	0	0.669354	0.959	0.781	0	4.2061e-200	0.337422	0.925	0.854	1.66654e-195	4.2061e-200	0
0	Csf2rb2	0	0.667378	0.61	0.17	0	4.26508e-130	0.338444	0.487	0.288	1.68991e-125	4.26508e-130	0
0	Rps27	0	0.666047	0.995	0.957	0	0	0.346769	0.99	0.973	0	0	0
0	Gpr141	0	0.66577	0.377	0.022	0	0	0.792536	0.387	0.039	0	0	0
0	Pirb	0	0.66477	0.528	0.093	0	0	0.48931	0.351	0.08	0	0	0
0	Ptpn6	0	0.656482	0.866	0.307	0	7.862e-194	0.379098	0.806	0.501	3.11508e-189	7.862e-194	0
0	Ifngr2	0	0.653495	0.771	0.291	0	3.02987e-148	0.355977	0.673	0.442	1.20049e-143	3.02987e-148	0
0	Hacd4	0	0.651677	0.509	0.091	0	1.57595e-191	0.390701	0.329	0.128	6.24422e-187	1.57595e-191	0
0	Sp100	0	0.65033	0.822	0.292	0	1.08247e-251	0.458138	0.803	0.495	4.28896e-247	1.08247e-251	0
0	Rps26	0	0.64974	0.986	0.896	0	2.36702e-253	0.348024	0.982	0.909	9.3786e-249	2.36702e-253	0
0	Rpl6	0	0.649458	0.995	0.964	0	2.26364e-233	0.317095	0.979	0.946	8.96898e-229	2.26364e-233	0
0	Cyp4f18	0	0.645758	0.45	0.044	0	0	0.810439	0.48	0.05	0	0	0
0	Stab1	0	0.637868	0.58	0.114	0	0	0.62399	0.542	0.19	0	0	0
0	Spi1	0	0.634988	0.714	0.235	0	4.17315e-150	0.359625	0.63	0.396	1.65349e-145	4.17315e-150	0
0	Frrs1	0	0.634541	0.591	0.149	0	1.05749e-150	0.378798	0.412	0.211	4.18997e-146	1.05749e-150	0
0	Dse	0	0.629867	0.585	0.121	0	0	0.577002	0.442	0.114	0	0	0
0	Dab2	0	0.623521	0.557	0.11	0	1.51933e-284	0.392215	0.304	0.077	6.01988e-280	1.51933e-284	0
0	Maf	0	0.621226	0.765	0.245	0	1.37179e-174	0.305829	0.676	0.413	5.43529e-170	1.37179e-174	0
0	Ahnak	0	0.618199	0.609	0.1	0	6.94257e-299	0.3392	0.469	0.155	2.75079e-294	6.94257e-299	0
0	Capg	0	0.618011	0.521	0.097	0	0	0.644972	0.476	0.149	0	0	0
0	Naip2	0	0.617598	0.557	0.127	0	4.02503e-162	0.397555	0.403	0.201	1.5948e-157	4.02503e-162	0
0	Csf2rb	0	0.617105	0.696	0.218	0	1.72687e-197	0.352941	0.727	0.433	6.8422e-193	1.72687e-197	0
0	Rps5	0	0.614082	0.995	0.948	0	1.66036e-218	0.309141	0.975	0.933	6.57866e-214	1.66036e-218	0
0	ENSMUSG00000120849	0	0.602935	0.468	0.049	0	0	0.437166	0.299	0.052	0	0	0
0	Osbpl3	0	0.600892	0.457	0.07	0	0	0.450199	0.311	0.066	0	0	0
0	Abracl	0	0.589659	0.658	0.202	0	1.9428e-249	0.424861	0.581	0.299	7.69774e-245	1.9428e-249	0
0	Gas2l3	0	0.581359	0.418	0.069	0	9.76884e-223	0.425276	0.281	0.085	3.87061e-218	9.76884e-223	0
0	Pid1	0	0.574057	0.449	0.09	0	1.75466e-222	0.41814	0.338	0.122	6.95233e-218	1.75466e-222	0
0	Abcc3	0	0.571153	0.496	0.113	0	2.0994e-185	0.410613	0.368	0.16	8.31825e-181	2.0994e-185	0
0	AI662270	0	0.55541	0.549	0.108	0	0	0.464591	0.471	0.141	0	0	0
0	Cd300c2	0	0.552035	0.58	0.149	0	1.36078e-200	0.406174	0.595	0.33	5.39167e-196	1.36078e-200	0
0	Xdh	0	0.55038	0.473	0.092	0	0	0.563892	0.366	0.057	0	0	0
0	Lst1	0	0.546525	0.498	0.109	0	0	0.832764	0.723	0.275	0	0	0
0	Ms4a14	0	0.544732	0.318	0.034	0	0	0.345121	0.167	0.013	0	0	0
0	Itga4	0	0.540268	0.775	0.185	0	0	0.386211	0.561	0.184	0	0	0
0	Arhgap19	0	0.535076	0.431	0.08	0	2.65182e-192	0.364671	0.252	0.078	1.0507e-187	2.65182e-192	0
0	Sirpb1b	0	0.496388	0.339	0.01	0	0	0.605514	0.336	0.014	0	0	0
0	S1pr2	0	0.495232	0.422	0.073	0	0	0.450058	0.288	0.057	0	0	0
0	X4930430E12Rik	0	0.479263	0.312	0.014	0	0	0.571526	0.29	0.016	0	0	0
0	Arl11	0	0.467524	0.374	0.052	0	3.90561e-239	0.412169	0.283	0.082	1.54748e-234	3.90561e-239	0
0	Mefv	0	0.332229	0.224	0.006	0	0	0.400018	0.209	0.01	0	0	0
0	Dpep2	0	0.317926	0.212	0.007	0	0	0.427232	0.216	0.009	0	0	0
0	Runx3	1.17705e-306	0.468287	0.479	0.096	4.66372e-302	0	0.792176	0.595	0.144	0	1.17705e-306	0
0	Ier5	2.01448e-304	0.74251	0.869	0.358	7.98179e-300	0	0.646253	0.891	0.579	0	2.01448e-304	0
0	Plaur	3.56298e-301	0.708315	0.437	0.09	1.41173e-296	0	1.11364	0.626	0.202	0	3.56298e-301	0
0	Rgs1	3.61586e-301	1.10162	0.738	0.29	1.43267e-296	0	1.0228	0.726	0.388	0	3.61586e-301	0
0	Ifi211	4.72361e-298	0.599737	0.597	0.165	1.87159e-293	0	0.698472	0.579	0.211	0	4.72361e-298	0
0	Osm	7.47834e-296	0.986321	0.563	0.163	2.96307e-291	0	0.992736	0.65	0.293	0	7.47834e-296	0
0	Rps16	5.48664e-295	0.661458	0.953	0.683	2.17391e-290	0	0.425842	0.99	0.917	0	5.48664e-295	0
0	Mcl1	1.183e-287	0.721388	0.966	0.852	4.6873e-283	0	0.947436	0.97	0.8	0	1.183e-287	0
0	Arpc2	2.0457e-280	0.573549	0.977	0.88	8.10546e-276	0	0.447815	0.966	0.889	0	2.0457e-280	0
0	Mpp1	1.42532e-276	0.597575	0.622	0.223	5.6474e-272	0	0.704961	0.534	0.186	0	1.42532e-276	0
0	Cited2	4.7968e-275	0.877541	0.603	0.198	1.90059e-270	0	0.895748	0.567	0.26	0	4.7968e-275	0
0	Rpl38	1.40097e-273	0.56629	0.982	0.819	5.55093e-269	0	0.395209	0.985	0.915	0	1.40097e-273	0
0	Anxa4	2.85729e-272	0.744176	0.801	0.451	1.13211e-267	0	0.80095	0.692	0.298	0	2.85729e-272	0
0	Slfn1	2.17696e-267	0.53219	0.468	0.106	8.62554e-263	0	0.778342	0.52	0.143	0	2.17696e-267	0
0	Aldh2	1.48088e-266	0.557791	0.563	0.18	5.86753e-262	0	0.623033	0.56	0.231	0	1.48088e-266	0
0	Fosb	3.30447e-266	0.825122	0.714	0.298	1.3093e-261	0	0.609542	0.802	0.517	0	3.30447e-266	0
0	Emp3	1.15963e-264	0.388174	0.295	0.041	4.59469e-260	0	0.422928	0.303	0.062	0	1.15963e-264	0
0	Dnase1l1	1.57807e-259	0.416962	0.368	0.072	6.25265e-255	0	0.452962	0.303	0.048	0	1.57807e-259	0
0	Tnfsf12	8.0208e-257	0.460082	0.4	0.087	3.178e-252	0	0.639528	0.505	0.167	0	8.0208e-257	0
0	Arpc1b	2.05002e-256	0.549073	0.976	0.834	8.12261e-252	0	0.523642	0.971	0.833	0	2.05002e-256	0
0	Klf6	7.29652e-256	0.685129	0.929	0.683	2.89103e-251	0	0.841544	0.918	0.703	0	7.29652e-256	0
0	Gm6377	5.09068e-255	0.513638	0.409	0.086	2.01703e-250	0	0.781456	0.526	0.113	0	5.09068e-255	0
0	Atp6v0c	1.09224e-250	0.6511	0.888	0.678	4.32769e-246	0	0.500668	0.968	0.893	0	1.09224e-250	0
0	Samhd1	6.11992e-248	0.56051	0.879	0.49	2.42484e-243	0	0.580459	0.877	0.569	0	6.11992e-248	0
0	Flt1	1.07254e-247	0.3524	0.299	0.045	4.2496e-243	0	0.360196	0.215	0.029	0	1.07254e-247	0
0	Vegfa	1.26747e-243	1.02868	0.436	0.117	5.02196e-239	0	1.37064	0.541	0.185	0	1.26747e-243	0
0	Rab7b	1.68103e-242	0.440756	0.351	0.068	6.66059e-238	0	0.650907	0.451	0.116	0	1.68103e-242	0
0	Fth1	1.26651e-241	0.602093	1	0.981	5.01816e-237	0	0.691531	0.999	0.989	0	1.26651e-241	0
0	Lmo4	2.05137e-236	0.755531	0.711	0.353	8.12793e-232	0	0.761906	0.665	0.332	0	2.05137e-236	0
0	Sik1	1.67522e-228	0.584849	0.499	0.151	6.63755e-224	0	0.785566	0.647	0.213	0	1.67522e-228	0
0	Plin2	2.24421e-227	0.47777	0.451	0.129	8.89199e-223	0	1.00703	0.629	0.172	0	2.24421e-227	0
0	Sh3bgrl3	5.65531e-225	0.576876	0.92	0.704	2.24075e-220	0	0.457778	0.951	0.82	0	5.65531e-225	0
0	Txn1	1.31014e-224	0.593445	0.944	0.802	5.19105e-220	0	0.583984	0.922	0.739	0	1.31014e-224	0
0	Nampt	5.39649e-220	0.614553	0.94	0.823	2.1382e-215	0	0.769889	0.885	0.682	0	5.39649e-220	0
0	Actr3	8.5756e-213	0.477681	0.955	0.867	3.39783e-208	0	0.425477	0.944	0.865	0	8.5756e-213	0
0	Rasgef1b	2.27672e-210	0.622715	0.54	0.191	9.02084e-206	0	0.785155	0.745	0.409	0	2.27672e-210	0
0	H3f3b	2.6196e-207	0.552052	0.993	0.983	1.03794e-202	0	0.898978	0.991	0.976	0	2.6196e-207	0
0	Hspa8	2.40689e-186	0.414178	0.989	0.98	9.53658e-182	0	0.502818	0.997	0.99	0	2.40689e-186	0
0	Il1b	2.53436e-178	1.13101	0.457	0.156	1.00416e-173	0	1.08044	0.74	0.373	0	2.53436e-178	0
0	Haus8	3.01279e-174	0.416655	0.353	0.098	1.19373e-169	0	0.535431	0.367	0.108	0	3.01279e-174	0
0	Gpr35	7.67293e-170	0.368727	0.379	0.108	3.04017e-165	0	0.664045	0.544	0.228	0	7.67293e-170	0
0	H2-DMb1	1.26885e-141	0.305517	0.3	0.081	5.02743e-137	0	0.611342	0.587	0.265	0	1.26885e-141	0
0	Msrb1	2.46043e-141	0.523042	0.709	0.459	9.74873e-137	0	1.03895	0.758	0.311	0	2.46043e-141	0
0	Irf2bp2	2.82402e-140	0.4594	0.917	0.82	1.11893e-135	0	0.561612	0.927	0.749	0	2.82402e-140	0
0	Irf7	7.42289e-105	0.460062	0.641	0.404	2.9411e-100	0	0.649586	0.682	0.382	0	7.42289e-105	0
0	Fosl2	5.32356e-91	0.553993	0.492	0.285	2.1093e-86	0	0.842062	0.726	0.385	0	5.32356e-91	0
0	Nfil3	9.03364e-65	0.372561	0.409	0.234	3.57931e-60	0	1.04611	0.688	0.293	0	9.03364e-65	0
0	Ccr2	5.61997e-22	0.436622	0.123	0.056	2.22674e-17	0	1.11406	0.477	0.102	0	5.61997e-22	0
0	Rpl22	4.50323e-308	0.636181	0.979	0.831	1.78427e-303	1.73519e-182	0.305125	0.932	0.833	6.87518e-178	1.73519e-182	9.00646e-308
0	Lpar6	7.9262e-281	0.704713	0.6	0.196	3.14052e-276	5.19035e-308	0.673006	0.491	0.207	2.05652e-303	7.9262e-281	1.03807e-307
0	Ftl1-ps1	4.88846e-307	0.6717	0.685	0.267	1.93691e-302	5.43482e-200	0.448867	0.501	0.277	2.15338e-195	5.43482e-200	9.77692e-307
0	Ckap4	2.56838e-306	0.519167	0.384	0.064	1.01764e-301	2.5646e-194	0.454735	0.336	0.133	1.01615e-189	2.5646e-194	5.13677e-306
0	Anxa1	8.71528e-306	0.368761	0.269	0.024	3.45317e-301	2.11148e-286	0.419788	0.222	0.037	8.36611e-282	2.11148e-286	1.74306e-305
0	Gusb	7.71185e-305	0.68606	0.822	0.385	3.05559e-300	5.94958e-146	0.326399	0.703	0.474	2.35734e-141	5.94958e-146	1.54237e-304
0	Fgr	9.92988e-259	0.461817	0.371	0.071	3.93442e-254	4.70425e-303	0.491891	0.367	0.111	1.86392e-298	9.92988e-259	9.40851e-303
0	Trim30a	2.11533e-302	0.69823	0.865	0.364	8.38135e-298	9.0175e-181	0.367321	0.825	0.55	3.57291e-176	9.0175e-181	4.23066e-302
0	Tuba1c	2.01345e-188	0.442792	0.473	0.155	7.9777e-184	7.01492e-301	0.536495	0.504	0.213	2.77945e-296	2.01345e-188	1.40298e-300
0	Rpl26	1.94291e-300	0.662595	0.961	0.707	7.69822e-296	4.20325e-274	0.401235	0.971	0.851	1.66541e-269	4.20325e-274	3.88583e-300
0	Sp140	9.95791e-299	0.533507	0.751	0.258	3.94552e-294	1.05237e-283	0.502735	0.719	0.403	4.16969e-279	1.05237e-283	1.99158e-298
0	Pfn1	1.2855e-196	0.470356	0.911	0.733	5.09341e-192	4.24323e-295	0.369118	0.959	0.868	1.68125e-290	1.2855e-196	8.48645e-295
0	Plekhf2	9.19334e-220	0.515048	0.536	0.18	3.64259e-215	7.37292e-295	0.563192	0.541	0.255	2.9213e-290	9.19334e-220	1.47458e-294
0	Clec4a3	2.73391e-294	0.612361	0.452	0.096	1.08323e-289	3.20171e-171	0.394745	0.271	0.096	1.26858e-166	3.20171e-171	5.46781e-294
0	Rps24	2.40904e-293	0.648724	0.998	0.952	9.54509e-289	1.74737e-237	0.316757	0.993	0.958	6.92345e-233	1.74737e-237	4.81808e-293
0	Ncapg2	6.79699e-254	0.405439	0.32	0.054	2.6931e-249	2.76029e-293	0.342142	0.213	0.034	1.09368e-288	6.79699e-254	5.52059e-293
0	Fcgr1	6.40499e-290	0.562232	0.615	0.176	2.53779e-285	2.79533e-204	0.430883	0.607	0.332	1.10756e-199	2.79533e-204	1.281e-289
0	Rps8	4.55584e-289	0.661931	0.955	0.737	1.80511e-284	3.04759e-271	0.39398	0.968	0.893	1.20752e-266	3.04759e-271	9.11168e-289
0	Syk	6.78819e-289	0.524113	0.515	0.132	2.68962e-284	1.44833e-127	0.345428	0.405	0.224	5.73857e-123	1.44833e-127	1.35764e-288
0	Mfsd1	8.16909e-288	0.693105	0.799	0.405	3.23676e-283	1.25479e-128	0.351367	0.614	0.437	4.97173e-124	1.25479e-128	1.63382e-287
0	Slamf9	4.35535e-287	0.624983	0.582	0.167	1.72568e-282	3.45858e-202	0.478278	0.594	0.332	1.37036e-197	3.45858e-202	8.7107e-287
0	Gm9794	5.12602e-285	0.645122	0.934	0.619	2.03103e-280	1.19296e-178	0.330615	0.854	0.681	4.72674e-174	1.19296e-178	1.0252e-284
0	Abr	2.32776e-284	0.475449	0.445	0.098	9.22307e-280	2.01429e-162	0.352046	0.314	0.132	7.98102e-158	2.01429e-162	4.65553e-284
0	Oas3	2.37578e-260	0.448175	0.347	0.061	9.4133e-256	4.92132e-284	0.494156	0.378	0.125	1.94993e-279	2.37578e-260	9.84265e-284
0	Fes	8.71836e-284	0.53195	0.493	0.123	3.45439e-279	6.76318e-171	0.390319	0.351	0.156	2.67971e-166	6.76318e-171	1.74367e-283
0	Fn1	1.83335e-203	0.390905	0.222	0.028	7.26412e-199	1.87783e-283	0.497536	0.218	0.037	7.44035e-279	1.83335e-203	3.75567e-283
0	Ifitm2	9.86516e-281	0.539015	0.468	0.107	3.90877e-276	9.54232e-264	0.447606	0.381	0.13	3.78086e-259	9.54232e-264	1.97303e-280
0	Rpl41	1.18859e-279	0.555915	0.997	0.959	4.70943e-275	1.94064e-249	0.318037	0.994	0.957	7.6892e-245	1.94064e-249	2.37718e-279
0	AU020206	2.36797e-279	0.617472	0.868	0.414	9.38236e-275	9.30994e-155	0.304924	0.746	0.491	3.68878e-150	9.30994e-155	4.73593e-279
0	Tmem176a	3.15363e-279	0.544566	0.473	0.112	1.24953e-274	2.27528e-119	0.334251	0.383	0.204	9.01511e-115	2.27528e-119	6.30725e-279
0	Rbm47	5.72588e-279	0.531716	0.529	0.142	2.26871e-274	2.60465e-233	0.457762	0.433	0.187	1.03201e-228	2.60465e-233	1.14518e-278
0	Gla	1.63322e-192	0.612324	0.575	0.257	6.47116e-188	6.40561e-278	0.582384	0.51	0.239	2.53803e-273	1.63322e-192	1.28112e-277
0	Rpl13	2.05267e-277	0.598139	0.974	0.759	8.13309e-273	8.26833e-178	0.304226	0.949	0.816	3.27608e-173	8.26833e-178	4.10534e-277
0	Acod1	2.82093e-267	0.875227	0.428	0.096	1.11771e-262	1.6467e-276	0.764748	0.405	0.14	6.52456e-272	2.82093e-267	3.2934e-276
0	Sh3bgrl	1.11818e-263	0.686414	0.761	0.395	4.43045e-259	4.36825e-276	0.491744	0.567	0.281	1.73079e-271	1.11818e-263	8.7365e-276
0	Vasp	3.81055e-272	0.675123	0.806	0.378	1.50982e-267	4.06469e-163	0.359597	0.795	0.567	1.61051e-158	4.06469e-163	7.62109e-272
0	Atp2b1	1.84253e-127	0.471934	0.882	0.763	7.30048e-123	6.29436e-272	0.53427	0.837	0.687	2.49395e-267	1.84253e-127	1.25887e-271
0	H2-DMa	1.08973e-271	0.590342	0.625	0.204	4.31771e-267	4.54771e-158	0.378287	0.556	0.328	1.80189e-153	4.54771e-158	2.17945e-271
0	Akr1a1	1.79594e-268	0.607731	0.955	0.849	7.11587e-264	3.55334e-271	0.435948	0.913	0.811	1.40791e-266	1.79594e-268	7.10668e-271
0	Gsdmd	1.65378e-269	0.554881	0.673	0.23	6.55259e-265	3.79974e-142	0.369635	0.519	0.312	1.50553e-137	3.79974e-142	3.30755e-269
0	Dck	4.80498e-188	0.384483	0.373	0.098	1.90383e-183	5.0978e-269	0.482636	0.417	0.159	2.01985e-264	4.80498e-188	1.01956e-268
0	Rps2	1.47729e-267	0.62986	0.929	0.691	5.85333e-263	1.66394e-212	0.369813	0.885	0.754	6.59286e-208	1.66394e-212	2.95459e-267
0	Ncf2	1.60218e-265	0.535935	0.581	0.176	6.34815e-261	2.76591e-133	0.333752	0.525	0.315	1.09591e-128	2.76591e-133	3.20436e-265
0	Rack1	1.78842e-232	0.577149	0.861	0.52	7.08606e-228	2.57914e-264	0.385972	0.94	0.802	1.02191e-259	1.78842e-232	5.15829e-264
0	Rpl9	6.77008e-248	0.558926	0.971	0.903	2.68244e-243	8.72184e-264	0.317963	0.985	0.955	3.45577e-259	6.77008e-248	1.74437e-263
0	Junb	1.14878e-263	0.769142	0.929	0.701	4.5517e-259	3.98878e-215	0.495715	0.923	0.78	1.58043e-210	3.98878e-215	2.29756e-263
0	Bcl2l11	6.64017e-144	0.393735	0.423	0.153	2.63097e-139	1.95965e-263	0.520375	0.443	0.176	7.76452e-259	6.64017e-144	3.9193e-263
0	Ptgs2	9.00569e-178	1.06628	0.335	0.085	3.56823e-173	6.88092e-261	0.888052	0.474	0.201	2.72636e-256	9.00569e-178	1.37618e-260
0	Tep1	1.82544e-259	0.527633	0.519	0.156	7.23277e-255	1.10628e-249	0.470848	0.418	0.173	4.3833e-245	1.10628e-249	3.65089e-259
0	Tent5a	5.81524e-146	0.571664	0.723	0.435	2.30411e-141	4.24078e-257	0.6321	0.638	0.373	1.68028e-252	5.81524e-146	8.48156e-257
0	Casp8	7.81593e-257	0.55057	0.633	0.212	3.09683e-252	7.23346e-139	0.327826	0.567	0.348	2.86604e-134	7.23346e-139	1.56319e-256
0	AA467197	6.80072e-153	0.4649	0.294	0.071	2.69458e-148	4.60551e-256	0.510321	0.266	0.064	1.8248e-251	6.80072e-153	9.21102e-256
0	Il1rn	1.82101e-102	0.455041	0.184	0.041	7.21522e-98	1.30648e-255	1.04555	0.355	0.123	5.17653e-251	1.82101e-102	2.61296e-255
0	Ccnl1	9.01485e-168	0.514778	0.829	0.561	3.57186e-163	8.7261e-255	0.476454	0.888	0.688	3.45746e-250	9.01485e-168	1.74522e-254
0	Rpl37a	5.00731e-241	0.557722	0.872	0.519	1.984e-236	1.26574e-251	0.352039	0.983	0.897	5.01512e-247	5.00731e-241	2.53148e-251
0	Psen2	7.05297e-115	0.391027	0.472	0.226	2.79453e-110	1.82537e-250	0.499458	0.461	0.211	7.23248e-246	7.05297e-115	3.65074e-250
0	Ptger4	1.19268e-145	0.386708	0.49	0.181	4.72565e-141	1.27852e-249	0.612803	0.497	0.219	5.06575e-245	1.19268e-145	2.55704e-249
0	Tpd52	1.69181e-76	0.338768	0.875	0.783	6.70328e-72	2.30424e-249	0.50042	0.829	0.684	9.12988e-245	1.69181e-76	4.60849e-249
0	Runx1	6.14199e-249	0.566479	0.641	0.229	2.43358e-244	1.2866e-106	0.308945	0.497	0.311	5.09775e-102	1.2866e-106	1.2284e-248
0	Rpl10	2.17292e-246	0.600621	0.803	0.439	8.60955e-242	1.16907e-225	0.444002	0.75	0.536	4.6321e-221	1.16907e-225	4.34584e-246
0	Rab20	3.93537e-246	0.529158	0.492	0.136	1.55927e-241	5.25332e-104	0.306188	0.461	0.278	2.08147e-99	5.25332e-104	7.87075e-246
0	Tcirg1	4.13254e-192	0.474465	0.511	0.186	1.6374e-187	1.33329e-245	0.481386	0.615	0.343	5.28275e-241	4.13254e-192	2.66658e-245
0	Crlf2	4.65182e-244	0.48907	0.518	0.152	1.84314e-239	6.90879e-191	0.370302	0.339	0.133	2.7374e-186	6.90879e-191	9.30364e-244
0	Tifab	6.37701e-243	0.528128	0.508	0.146	2.5267e-238	4.08464e-169	0.417816	0.495	0.272	1.61842e-164	4.08464e-169	1.2754e-242
0	Dynlt2b	1.94667e-145	0.416223	0.468	0.193	7.71311e-141	1.6822e-239	0.465752	0.446	0.203	6.66522e-235	1.94667e-145	3.3644e-239
0	Hpcal1	4.26963e-181	0.509746	0.683	0.36	1.69171e-176	2.1192e-238	0.469709	0.649	0.404	8.39668e-234	4.26963e-181	4.23839e-238
0	Gabarap	7.28931e-182	0.37358	0.984	0.967	2.88817e-177	2.90071e-238	0.324945	0.961	0.938	1.14932e-233	7.28931e-182	5.80142e-238
0	Gng5	1.4073e-191	0.499457	0.922	0.74	5.57599e-187	1.90406e-237	0.416408	0.881	0.712	7.54425e-233	1.4073e-191	3.80811e-237
0	Dennd1b	1.97887e-235	0.537956	0.559	0.183	7.84067e-231	1.65793e-109	0.305334	0.392	0.221	6.56905e-105	1.65793e-109	3.95774e-235
0	Tlr1	2.71239e-234	0.510337	0.456	0.121	1.0747e-229	5.73271e-144	0.370963	0.374	0.186	2.27141e-139	5.73271e-144	5.42477e-234
0	Mtpn	1.17556e-233	0.601737	0.909	0.738	4.65782e-229	8.48004e-176	0.402137	0.8	0.683	3.35996e-171	8.48004e-176	2.35113e-233
0	Sema4d	2.4193e-233	0.640638	0.848	0.558	9.58576e-229	2.37134e-159	0.385502	0.804	0.626	9.39573e-155	2.37134e-159	4.83861e-233
0	Snx18	2.87115e-148	0.490159	0.688	0.401	1.13761e-143	1.4726e-232	0.521098	0.698	0.455	5.83475e-228	2.87115e-148	2.94521e-232
0	Rnf213	1.47527e-204	0.642058	0.855	0.577	5.84533e-200	2.55043e-232	0.445225	0.843	0.637	1.01053e-227	1.47527e-204	5.10086e-232
0	Ciita	1.06979e-138	0.33095	0.323	0.093	4.23872e-134	3.18469e-232	0.453101	0.387	0.147	1.26184e-227	1.06979e-138	6.36937e-232
0	Nadk	1.23475e-196	0.564982	0.649	0.322	4.89233e-192	3.24046e-231	0.490482	0.576	0.34	1.28393e-226	1.23475e-196	6.48092e-231
0	Kdm7a	6.43556e-231	0.629179	0.685	0.304	2.5499e-226	1.64576e-178	0.45943	0.61	0.393	6.52082e-174	1.64576e-178	1.28711e-230
0	Pqlc3	2.23351e-131	0.385953	0.502	0.232	8.8496e-127	2.44859e-230	0.357431	0.338	0.115	9.70182e-226	2.23351e-131	4.89719e-230
0	Rpl34	1.58532e-213	0.496164	0.926	0.653	6.28136e-209	5.00005e-228	0.336503	0.97	0.873	1.98112e-223	1.58532e-213	1.00001e-227
0	Gm15832	2.04986e-220	0.335329	0.266	0.04	8.12196e-216	3.50035e-227	0.39277	0.247	0.065	1.38691e-222	2.04986e-220	7.0007e-227
0	Rrbp1	4.49126e-225	0.611416	0.83	0.539	1.77953e-220	9.90296e-113	0.31371	0.704	0.545	3.92375e-108	9.90296e-113	8.98251e-225
0	Bri3	1.20165e-98	0.404913	0.687	0.477	4.76118e-94	5.68474e-225	0.444967	0.8	0.616	2.25241e-220	1.20165e-98	1.13695e-224
0	Mapkapk3	2.12418e-224	0.416648	0.403	0.099	8.41643e-220	3.03473e-188	0.333811	0.303	0.11	1.20242e-183	3.03473e-188	4.24836e-224
0	Cast	3.34823e-222	0.43178	0.512	0.16	1.32663e-217	8.17397e-152	0.30009	0.409	0.201	3.23869e-147	8.17397e-152	6.69645e-222
0	Itga5	3.16405e-220	0.416118	0.329	0.066	1.25366e-215	2.56815e-164	0.385086	0.297	0.117	1.01755e-159	2.56815e-164	6.3281e-220
0	Map3k1	4.16551e-220	0.46451	0.607	0.215	1.65046e-215	1.51666e-179	0.390936	0.513	0.28	6.00931e-175	1.51666e-179	8.33101e-220
0	Myo5a	4.54733e-220	0.618427	0.736	0.378	1.80174e-215	8.44514e-124	0.33816	0.518	0.331	3.34613e-119	8.44514e-124	9.09466e-220
0	Pnrc1	5.41341e-180	0.545728	0.839	0.611	2.1449e-175	1.08952e-219	0.46841	0.782	0.601	4.31689e-215	5.41341e-180	2.17904e-219
0	Capza2	2.10055e-218	0.553219	0.922	0.781	8.3228e-214	3.01985e-145	0.30594	0.877	0.759	1.19652e-140	3.01985e-145	4.2011e-218
0	Btg1	1.76896e-216	0.454662	0.849	0.413	7.00899e-212	4.03032e-191	0.354256	0.898	0.645	1.59689e-186	4.03032e-191	3.53793e-216
0	Skil	2.66887e-214	0.56333	0.827	0.438	1.05746e-209	7.95467e-141	0.303048	0.866	0.639	3.1518e-136	7.95467e-141	5.33773e-214
0	Fau	1.07536e-205	0.496568	0.871	0.52	4.26079e-201	4.00135e-213	0.365093	0.914	0.716	1.58541e-208	1.07536e-205	8.0027e-213
0	Efhd2	8.10646e-213	0.469622	0.646	0.242	3.21194e-208	1.94464e-142	0.319842	0.688	0.442	7.70504e-138	1.94464e-142	1.62129e-212
0	Arrdc4	1.98893e-212	0.596114	0.561	0.207	7.88055e-208	4.38253e-60	0.301602	0.347	0.228	1.73644e-55	4.38253e-60	3.97787e-212
0	Ehd4	1.33347e-211	0.532881	0.667	0.282	5.28348e-207	3.16972e-180	0.393277	0.615	0.381	1.25591e-175	3.16972e-180	2.66694e-211
0	Gsto1	1.16422e-209	0.574061	0.616	0.271	4.61287e-205	3.12938e-138	0.377864	0.478	0.294	1.23992e-133	3.12938e-138	2.32844e-209
0	Ctbp2	3.38891e-209	0.44494	0.494	0.152	1.34275e-204	2.04145e-104	0.310652	0.388	0.226	8.08863e-100	2.04145e-104	6.77782e-209
0	Notch2	5.80488e-208	0.486486	0.58	0.216	2.30001e-203	7.12206e-115	0.326461	0.444	0.266	2.8219e-110	7.12206e-115	1.16098e-207
0	Sema4a	3.4794e-207	0.434158	0.515	0.158	1.37861e-202	1.95164e-128	0.305675	0.413	0.218	7.73278e-124	1.95164e-128	6.9588e-207
0	Clec2d	2.02091e-206	0.498995	0.739	0.31	8.00723e-202	5.83962e-116	0.341809	0.603	0.399	2.31377e-111	5.83962e-116	4.04181e-206
0	Tent5c	1.20554e-205	0.55608	0.633	0.234	4.77659e-201	2.56514e-125	0.378826	0.686	0.444	1.01636e-120	2.56514e-125	2.41108e-205
0	Ets2	5.01698e-118	0.368704	0.365	0.131	1.98783e-113	6.70485e-205	0.480562	0.492	0.251	2.65659e-200	5.01698e-118	1.34097e-204
0	Slc3a2	1.21327e-108	0.417671	0.816	0.676	4.80724e-104	7.20863e-205	0.402818	0.831	0.659	2.8562e-200	1.21327e-108	1.44173e-204
0	P2rx4	1.86546e-195	0.503191	0.551	0.22	7.39134e-191	4.92585e-204	0.441798	0.473	0.245	1.95172e-199	1.86546e-195	9.85169e-204
0	Ybx1	1.23654e-203	0.47501	0.949	0.86	4.89942e-199	7.34661e-178	0.343833	0.867	0.801	2.91087e-173	7.34661e-178	2.47308e-203
0	Cmtm7	1.65525e-203	0.445846	0.497	0.158	6.55842e-199	5.02788e-110	0.304815	0.453	0.274	1.99215e-105	5.02788e-110	3.31049e-203
0	Fnip2	1.41095e-82	0.444493	0.506	0.305	5.59047e-78	8.49227e-203	0.536428	0.447	0.232	3.36481e-198	1.41095e-82	1.69845e-202
0	Trim30d	1.59197e-201	0.487642	0.624	0.231	6.3077e-197	2.55221e-114	0.322058	0.567	0.366	1.01124e-109	2.55221e-114	3.18394e-201
0	Clcn7	4.1057e-201	0.543151	0.545	0.223	1.62676e-196	3.6639e-157	0.424645	0.4	0.21	1.45171e-152	3.6639e-157	8.21141e-201
0	Tiparp	5.61569e-46	0.348943	0.39	0.246	2.22505e-41	7.25651e-200	0.531211	0.486	0.256	2.87517e-195	5.61569e-46	1.4513e-199
0	Ptbp3	3.86524e-196	0.559395	0.864	0.608	1.53148e-191	1.0154e-137	0.316715	0.786	0.645	4.02324e-133	1.0154e-137	7.73048e-196
0	Slamf8	1.02677e-189	0.446557	0.422	0.122	4.06829e-185	9.39804e-128	0.400747	0.364	0.192	3.72369e-123	9.39804e-128	2.05355e-189
0	Mef2a	4.37825e-151	0.526335	0.838	0.644	1.73475e-146	4.50259e-189	0.423947	0.786	0.621	1.78401e-184	4.37825e-151	9.00517e-189
0	Ptpn1	5.89256e-187	0.574296	0.761	0.451	2.33475e-182	3.6552e-102	0.325747	0.669	0.506	1.44826e-97	3.6552e-102	1.17851e-186
0	Slfn2	8.44543e-186	0.409311	0.454	0.139	3.34625e-181	1.14149e-123	0.382449	0.429	0.24	4.52281e-119	1.14149e-123	1.68909e-185
0	Pitpna	1.84884e-89	0.379522	0.786	0.659	7.32547e-85	8.90665e-186	0.422661	0.768	0.637	3.52899e-181	1.84884e-89	1.78133e-185
0	Jun	4.42703e-185	0.83178	0.934	0.82	1.75408e-180	9.17831e-154	0.622399	0.886	0.766	3.63663e-149	9.17831e-154	8.85405e-185
0	Sestd1	1.24372e-182	0.463183	0.423	0.136	4.92787e-178	4.42133e-167	0.320288	0.247	0.084	1.75182e-162	4.42133e-167	2.48744e-182
0	Btg2	3.10339e-178	0.459232	0.743	0.359	1.22963e-173	2.9597e-175	0.394105	0.873	0.625	1.17269e-170	2.9597e-175	6.20678e-178
0	Sap30	1.16869e-177	0.337768	0.287	0.061	4.6306e-173	2.21266e-166	0.343169	0.252	0.087	8.76699e-162	2.21266e-166	2.33739e-177
0	Phf11b	7.2228e-172	0.439002	0.569	0.216	2.86182e-167	2.16329e-176	0.426987	0.628	0.372	8.5714e-172	7.2228e-172	4.32659e-176
0	Snx20	4.03718e-175	0.422532	0.472	0.159	1.59961e-170	6.17819e-87	0.314272	0.415	0.263	2.44792e-82	6.17819e-87	8.07436e-175
0	Tpi1	6.35856e-174	0.530654	0.573	0.257	2.51939e-169	1.3288e-168	0.48574	0.603	0.406	5.26495e-164	1.3288e-168	1.27171e-173
0	Trps1	3.13178e-161	0.58308	0.598	0.302	1.24087e-156	8.01031e-174	0.386703	0.367	0.162	3.17385e-169	3.13178e-161	1.60206e-173
0	Cndp2	1.26361e-171	0.498044	0.608	0.296	5.00667e-167	3.29345e-164	0.42494	0.634	0.443	1.30493e-159	3.29345e-164	2.52722e-171
0	Jund	1.39987e-97	0.476494	0.972	0.972	5.54657e-93	1.77955e-170	0.459924	0.966	0.933	7.05095e-166	1.39987e-97	3.55911e-170
0	N4bp1	3.16895e-170	0.573441	0.661	0.355	1.2556e-165	1.42333e-166	0.476365	0.607	0.408	5.63951e-162	1.42333e-166	6.33789e-170
0	Mknk2	7.28411e-116	0.345871	0.494	0.228	2.88611e-111	3.32342e-169	0.393283	0.533	0.308	1.31681e-164	7.28411e-116	6.64684e-169
0	Tapbp	3.98701e-116	0.396711	0.917	0.77	1.57973e-111	7.88934e-166	0.342366	0.932	0.829	3.12591e-161	3.98701e-116	1.57787e-165
0	Hmox1	2.11791e-164	0.693073	0.599	0.3	8.39159e-160	7.64623e-126	0.597254	0.446	0.269	3.02959e-121	7.64623e-126	4.23582e-164
0	Ifnar1	2.33281e-164	0.507934	0.606	0.301	9.24307e-160	6.93904e-159	0.408435	0.478	0.278	2.74938e-154	6.93904e-159	4.66563e-164
0	Rnf19b	1.69297e-95	0.38888	0.704	0.464	6.70787e-91	7.52411e-161	0.433635	0.714	0.511	2.9812e-156	1.69297e-95	1.50482e-160
0	Hk3	2.63043e-159	0.340076	0.341	0.093	1.04223e-154	4.14379e-106	0.352065	0.308	0.161	1.64185e-101	4.14379e-106	5.26086e-159
0	Slfn8	2.13251e-154	0.495677	0.704	0.378	8.44941e-150	4.21769e-141	0.401159	0.541	0.338	1.67114e-136	4.21769e-141	4.26501e-154
0	Skap2	1.16663e-153	0.486123	0.765	0.503	4.6224e-149	2.4841e-148	0.36269	0.671	0.481	9.84249e-144	2.4841e-148	2.33325e-153
0	Sem1	2.218e-86	0.360295	0.7	0.533	8.78814e-82	1.81947e-151	0.366916	0.688	0.529	7.20909e-147	2.218e-86	3.63893e-151
0	Flna	2.76346e-147	0.350259	0.431	0.154	1.09494e-142	4.74275e-129	0.311853	0.406	0.218	1.87917e-124	4.74275e-129	5.52692e-147
0	Plau	3.02966e-147	0.408076	0.336	0.098	1.20041e-142	1.58129e-74	0.489699	0.269	0.147	6.2654e-70	1.58129e-74	6.05932e-147
0	Irak2	1.4983e-142	0.379914	0.411	0.145	5.93656e-138	5.86677e-93	0.318326	0.393	0.242	2.32453e-88	5.86677e-93	2.9966e-142
0	Rpl35	1.76489e-140	0.390488	0.576	0.273	6.99285e-136	2.25408e-141	0.338873	0.818	0.644	8.93111e-137	1.76489e-140	4.50816e-141
0	Rasa4	2.01791e-137	0.316583	0.325	0.096	7.99535e-133	7.18533e-139	0.341324	0.355	0.175	2.84697e-134	2.01791e-137	1.43707e-138
0	Hspa1a	4.15143e-13	0.76759	0.386	0.347	1.64488e-08	3.60548e-136	0.980131	0.456	0.271	1.42856e-131	4.15143e-13	7.21096e-136
0	Nceh1	2.31653e-113	0.466168	0.589	0.355	9.17855e-109	1.91237e-135	0.380676	0.381	0.207	7.57721e-131	2.31653e-113	3.82475e-135
0	Prdx6	1.59351e-72	0.403026	0.674	0.553	6.31382e-68	9.18989e-135	0.429057	0.595	0.429	3.64122e-130	1.59351e-72	1.83798e-134
0	Ier3	7.66708e-133	0.380742	0.306	0.088	3.03785e-128	2.5706e-116	0.461622	0.371	0.203	1.01852e-111	2.5706e-116	1.53342e-132
0	Rest	2.33717e-132	0.484496	0.517	0.246	9.26033e-128	1.12553e-89	0.322434	0.389	0.241	4.45957e-85	1.12553e-89	4.67434e-132
0	Ubc	7.59307e-113	0.397282	0.993	0.99	3.00853e-108	1.87436e-129	0.361643	0.991	0.982	7.42661e-125	7.59307e-113	3.74873e-129
0	Txnip	1.38113e-89	0.305304	0.525	0.274	5.4723e-85	1.77538e-126	0.380779	0.54	0.34	7.03443e-122	1.38113e-89	3.55077e-126
0	Grb2	1.11739e-98	0.362968	0.817	0.664	4.42732e-94	3.40459e-122	0.30181	0.782	0.661	1.34897e-117	1.11739e-98	6.80918e-122
0	Cxcl9	1.34413e-71	0.815234	0.363	0.174	5.32573e-67	5.09457e-119	0.798778	0.319	0.154	2.01857e-114	1.34413e-71	1.01891e-118
0	Resf1	8.26181e-114	0.507884	0.695	0.448	3.27349e-109	3.94394e-118	0.39368	0.556	0.381	1.56267e-113	8.26181e-114	7.88787e-118
0	Sod2	4.80227e-88	0.705367	0.673	0.532	1.90275e-83	4.36037e-117	0.597337	0.539	0.41	1.72767e-112	4.80227e-88	8.72074e-117
0	Tmem219	2.98636e-72	0.303892	0.439	0.246	1.18326e-67	5.33783e-116	0.32755	0.522	0.355	2.11495e-111	2.98636e-72	1.06757e-115
0	Hspa5	2.69825e-112	0.522338	0.967	0.957	1.0691e-107	1.43378e-97	0.404636	0.948	0.923	5.68091e-93	1.43378e-97	5.39651e-112
0	Irf2	7.3458e-81	0.3421	0.767	0.596	2.91055e-76	1.06462e-109	0.336049	0.688	0.553	4.21825e-105	7.3458e-81	2.12925e-109
0	Gna13	1.99342e-52	0.319207	0.774	0.702	7.89833e-48	5.86276e-109	0.344588	0.806	0.706	2.32294e-104	1.99342e-52	1.17255e-108
0	Spp1	2.17725e-101	0.524376	0.236	0.067	8.62668e-97	2.29148e-87	0.834703	0.176	0.07	9.07929e-83	2.29148e-87	4.35449e-101
0	Pgam1	1.00209e-100	0.477715	0.852	0.789	3.97048e-96	1.53668e-69	0.328357	0.738	0.682	6.08863e-65	1.53668e-69	2.00418e-100
0	X1600014C10Rik	2.40036e-86	0.319892	0.364	0.163	9.51069e-82	2.13215e-99	0.34511	0.419	0.264	8.448e-95	2.40036e-86	4.2643e-99
0	Cxcl2	2.03157e-67	0.345847	0.102	0.019	8.04947e-63	2.69178e-99	0.373911	0.118	0.03	1.06654e-94	2.03157e-67	5.38357e-99
0	Prdx1	1.20875e-29	0.312149	0.955	0.933	4.78932e-25	4.77189e-99	0.332798	0.872	0.801	1.89072e-94	1.20875e-29	9.54379e-99
0	Tmem14c	5.0475e-98	0.410277	0.657	0.47	1.99992e-93	4.00866e-89	0.318056	0.582	0.466	1.58831e-84	4.00866e-89	1.0095e-97
0	Spg21	8.33834e-95	0.374175	0.577	0.35	3.30382e-90	5.58993e-94	0.304549	0.536	0.395	2.21484e-89	5.58993e-94	1.66767e-94
0	Pgd	1.14128e-93	0.311658	0.358	0.153	4.52198e-89	2.53634e-93	0.303389	0.498	0.349	1.00495e-88	2.53634e-93	2.28256e-93
0	Ang	2.3191e-93	0.393908	0.403	0.182	9.18872e-89	5.34714e-76	0.301904	0.415	0.271	2.11865e-71	5.34714e-76	4.63819e-93
0	Cpt1a	1.05053e-81	0.373703	0.582	0.38	4.16242e-77	1.11469e-90	0.307541	0.482	0.337	4.41663e-86	1.05053e-81	2.22938e-90
0	Slc43a2	9.07139e-73	0.380769	0.592	0.416	3.59427e-68	2.24183e-79	0.322155	0.511	0.387	8.88259e-75	9.07139e-73	4.48367e-79
0	Acsl1	3.22492e-42	0.433012	0.559	0.461	1.27778e-37	1.78565e-73	0.397703	0.41	0.291	7.07508e-69	3.22492e-42	3.57129e-73
0	Fabp5	1.31043e-72	0.705222	0.815	0.754	5.19219e-68	3.26147e-06	0.446443	0.458	0.454	0.129226	3.26147e-06	2.62086e-72
0	Osbpl8	2.27282e-59	0.378528	0.527	0.366	9.00535e-55	4.81215e-69	0.345301	0.394	0.276	1.90667e-64	2.27282e-59	9.6243e-69
0	Ifih1	1.43123e-49	0.301861	0.572	0.41	5.67084e-45	3.24354e-66	0.30821	0.452	0.329	1.28515e-61	1.43123e-49	6.48707e-66
0	Hspa1b	0.412592	0.589698	0.407	0.446	1	2.34395e-51	0.852616	0.407	0.301	9.2872e-47	0.412592	4.6879e-51
0	Cxcl10	1.99544e-20	0.612333	0.204	0.119	7.90632e-16	2.66702e-18	0.548659	0.324	0.256	1.05673e-13	2.66702e-18	3.99087e-20
1	Hexb	0	2.10647	1	0.594	0	0	1.45769	1	0.678	0	0	0
1	Cst7	0	1.99965	0.962	0.226	0	0	1.48385	0.891	0.251	0	0	0
1	Cx3cr1	0	1.91775	0.991	0.294	0	0	1.32681	0.993	0.443	0	0	0
1	Ly86	0	1.78323	1	0.442	0	0	1.29651	0.999	0.627	0	0	0
1	C1qc	0	1.70671	1	0.52	0	0	1.27736	1	0.577	0	0	0
1	C1qb	0	1.6647	1	0.586	0	0	1.15517	1	0.636	0	0	0
1	Ctss	0	1.66459	1	0.758	0	0	1.05409	1	0.821	0	0	0
1	Trem2	0	1.65997	0.999	0.331	0	0	1.09505	0.994	0.456	0	0	0
1	P2ry12	0	1.6373	0.92	0.222	0	0	1.29145	0.964	0.278	0	0	0
1	Serpine2	0	1.61762	0.916	0.119	0	0	1.03985	0.944	0.268	0	0	0
1	Cd180	0	1.60255	0.969	0.238	0	0	1.22248	0.984	0.441	0	0	0
1	C1qa	0	1.59316	0.997	0.322	0	0	1.22998	0.993	0.431	0	0	0
1	Lag3	0	1.54197	0.933	0.13	0	0	1.08022	0.875	0.189	0	0	0
1	Ctsd	0	1.53298	0.99	0.406	0	0	1.18202	0.985	0.458	0	0	0
1	Csf1r	0	1.52624	0.998	0.354	0	0	1.22702	0.997	0.544	0	0	0
1	Itgam	0	1.52236	0.974	0.259	0	0	1.25196	0.983	0.402	0	0	0
1	Lgals3bp	0	1.51355	0.998	0.574	0	0	1.13786	0.999	0.756	0	0	0
1	Fcgr3	0	1.45713	0.994	0.29	0	0	1.0488	0.983	0.436	0	0	0
1	Mpeg1	0	1.44888	1	0.393	0	0	0.994172	0.997	0.556	0	0	0
1	Lair1	0	1.44342	0.981	0.255	0	0	0.980052	0.974	0.417	0	0	0
1	P2ry13	0	1.41758	0.952	0.184	0	0	1.07622	0.928	0.267	0	0	0
1	Sat1	0	1.36266	0.998	0.748	0	0	0.804582	0.999	0.758	0	0	0
1	Ptgs1	0	1.36106	0.882	0.139	0	0	1.25882	0.941	0.217	0	0	0
1	Timp2	0	1.33994	0.958	0.48	0	0	1.05684	0.969	0.568	0	0	0
1	Sirpa	0	1.32986	0.972	0.28	0	0	0.920682	0.971	0.43	0	0	0
1	Ccl5	0	1.32979	0.904	0.376	0	2.28027e-170	0.538952	0.733	0.45	9.03489e-166	2.28027e-170	0
1	Ccl12	0	1.32602	0.761	0.219	0	0	1.15101	0.83	0.324	0	0	0
1	Cd33	0	1.31434	0.961	0.243	0	0	1.09383	0.964	0.339	0	0	0
1	Fcer1g	0	1.29447	1	0.483	0	0	0.715523	0.999	0.635	0	0	0
1	Ctsl	0	1.28932	0.97	0.54	0	0	0.992156	0.973	0.519	0	0	0
1	Tyrobp	0	1.28782	0.996	0.433	0	0	0.836529	0.998	0.627	0	0	0
1	Laptm5	0	1.27129	0.995	0.409	0	0	0.870452	0.996	0.638	0	0	0
1	Ccl4	0	1.2527	0.772	0.232	0	0	0.738455	0.868	0.432	0	0	0
1	Lgmn	0	1.25101	0.998	0.646	0	0	1.06623	0.995	0.679	0	0	0
1	Lpcat2	0	1.2429	0.971	0.323	0	0	1.06241	0.979	0.453	0	0	0
1	Tgfbr2	0	1.23263	0.976	0.289	0	0	0.912783	0.964	0.424	0	0	0
1	Ctsb	0	1.22757	1	0.979	0	0	0.9471	1	0.958	0	0	0
1	Ccl3	0	1.22026	0.783	0.234	0	0	0.688238	0.745	0.344	0	0	0
1	Grn	0	1.20475	0.998	0.641	0	0	1.09896	0.999	0.782	0	0	0
1	Gpr34	0	1.19996	0.805	0.089	0	0	0.818994	0.76	0.175	0	0	0
1	Marcks	0	1.19973	0.997	0.437	0	0	0.842566	0.998	0.658	0	0	0
1	Olfml3	0	1.19085	0.909	0.171	0	0	1.34432	0.995	0.423	0	0	0
1	Mafb	0	1.1902	0.975	0.29	0	0	0.520769	0.922	0.42	0	0	0
1	Siglech	0	1.18589	0.708	0.078	0	0	1.23718	0.947	0.204	0	0	0
1	Vsir	0	1.18544	0.937	0.248	0	0	0.916668	0.946	0.398	0	0	0
1	Cst3	0	1.18031	1	0.729	0	0	0.925061	0.999	0.915	0	0	0
1	Golm1	0	1.18028	0.869	0.144	0	0	0.944433	0.867	0.235	0	0	0
1	Ctsz	0	1.18013	0.992	0.479	0	0	0.87141	0.977	0.56	0	0	0
1	Tent5c	0	1.18	0.879	0.228	0	0	0.791705	0.906	0.412	0	0	0
1	Aif1	0	1.17001	0.972	0.314	0	0	0.822416	0.991	0.55	0	0	0
1	Fcgr2b	0	1.16525	0.984	0.293	0	0	0.808723	0.96	0.455	0	0	0
1	Rgs10	0	1.15046	0.982	0.386	0	0	0.927216	0.986	0.552	0	0	0
1	Sall1	0	1.15004	0.872	0.329	0	0	1.13408	0.902	0.262	0	0	0
1	Plek	0	1.14775	0.988	0.355	0	0	0.527843	0.975	0.546	0	0	0
1	Mertk	0	1.14577	0.928	0.208	0	0	0.961896	0.921	0.304	0	0	0
1	Il1a	0	1.13783	0.78	0.154	0	0	0.65446	0.878	0.251	0	0	0
1	Cd68	0	1.13615	0.98	0.368	0	4.34583e-302	0.432731	0.958	0.522	1.72191e-297	4.34583e-302	0
1	Pde3b	0	1.11267	0.876	0.169	0	0	0.881042	0.884	0.271	0	0	0
1	Tgfbr1	0	1.10214	0.964	0.408	0	0	0.689713	0.96	0.526	0	0	0
1	Kctd12	0	1.09783	0.924	0.317	0	0	0.800664	0.971	0.47	0	0	0
1	Slco2b1	0	1.08575	0.778	0.098	0	0	1.0586	0.883	0.19	0	0	0
1	Cd84	0	1.07298	0.958	0.274	0	0	0.504861	0.788	0.366	0	0	0
1	Man2b1	0	1.07173	0.931	0.344	0	0	0.893906	0.943	0.457	0	0	0
1	Serinc3	0	1.06636	1	0.944	0	0	0.862752	0.998	0.909	0	0	0
1	Creg1	0	1.06413	0.954	0.438	0	0	0.725374	0.929	0.484	0	0	0
1	Gm2629	0	1.0625	0.763	0.088	0	0	0.766623	0.7	0.162	0	0	0
1	Hpgds	0	1.06202	0.895	0.2	0	0	0.705806	0.852	0.309	0	0	0
1	Mef2c	0	1.06136	0.854	0.166	0	0	0.844525	0.854	0.269	0	0	0
1	Fcrls	0	1.05945	0.714	0.114	0	0	0.730183	0.704	0.222	0	0	0
1	E230029C05Rik	0	1.05466	0.726	0.105	0	0	0.797532	0.722	0.207	0	0	0
1	Gns	0	1.05249	0.974	0.519	0	0	0.81407	0.982	0.626	0	0	0
1	Adgre1	0	1.04286	0.952	0.254	0	0	0.637973	0.924	0.385	0	0	0
1	Arl4c	0	1.04194	0.949	0.344	0	0	0.573477	0.941	0.541	0	0	0
1	F11r	0	1.03927	0.9	0.228	0	0	0.785542	0.924	0.4	0	0	0
1	Ctsc	0	1.03523	0.999	0.406	0	0	0.600307	0.994	0.593	0	0	0
1	Pld4	0	1.02629	0.938	0.286	0	0	0.856759	0.969	0.484	0	0	0
1	Lyn	0	1.01846	0.929	0.264	0	0	0.811914	0.929	0.403	0	0	0
1	Fyb	0	1.01774	0.985	0.358	0	8.0514e-248	0.411219	0.964	0.557	3.19012e-243	8.0514e-248	0
1	Tmem119	0	1.01561	0.728	0.09	0	0	0.922521	0.779	0.179	0	0	0
1	Cyth4	0	1.00949	0.953	0.31	0	0	0.661366	0.935	0.481	0	0	0
1	Asph	0	1.00622	0.789	0.14	0	0	0.765311	0.79	0.234	0	0	0
1	Itgb5	0	1.00466	0.88	0.215	0	0	0.844809	0.899	0.327	0	0	0
1	Bin2	0	1.00308	0.881	0.22	0	0	0.832591	0.89	0.359	0	0	0
1	Abhd12	0	0.989589	0.956	0.642	0	0	0.786789	0.958	0.592	0	0	0
1	Entpd1	0	0.985773	0.917	0.248	0	0	0.622235	0.864	0.394	0	0	0
1	Havcr2	0	0.981797	0.875	0.203	0	0	0.577339	0.809	0.335	0	0	0
1	Epb41l2	0	0.979551	0.977	0.645	0	0	0.726766	0.984	0.649	0	0	0
1	Lmo2	0	0.975274	0.887	0.203	0	0	0.642608	0.782	0.291	0	0	0
1	Pycard	0	0.970545	0.882	0.232	0	0	0.736769	0.823	0.326	0	0	0
1	Mylip	0	0.967715	0.844	0.226	0	0	0.641666	0.772	0.304	0	0	0
1	Pou2f2	0	0.966763	0.845	0.201	0	0	0.709481	0.807	0.313	0	0	0
1	Anxa3	0	0.964689	0.875	0.213	0	0	0.855711	0.888	0.289	0	0	0
1	Itgax	0	0.959953	0.772	0.177	0	0	0.664618	0.775	0.322	0	0	0
1	Cd53	0	0.95975	0.983	0.36	0	0	0.531878	0.982	0.572	0	0	0
1	Unc93b1	0	0.956274	0.959	0.391	0	0	0.730297	0.983	0.569	0	0	0
1	Itgb2	0	0.954282	0.97	0.337	0	0	0.671018	0.965	0.529	0	0	0
1	Ptpn6	0	0.953487	0.942	0.326	0	0	0.567708	0.922	0.494	0	0	0
1	Hcar2	0	0.950405	0.611	0.075	0	0	0.780217	0.543	0.104	0	0	0
1	Ctsh	0	0.944892	0.985	0.36	0	0	0.572146	0.977	0.545	0	0	0
1	Lpl	0	0.934834	0.39	0.041	0	9.02526e-186	0.430472	0.267	0.075	3.57599e-181	9.02526e-186	0
1	Abca1	0	0.928994	0.983	0.653	0	0	0.655519	0.898	0.487	0	0	0
1	Pros1	0	0.925839	0.849	0.337	0	0	0.86758	0.812	0.233	0	0	0
1	Ifi204	0	0.914413	0.886	0.279	0	0	0.501506	0.877	0.442	0	0	0
1	Cfh	0	0.907128	0.809	0.105	0	0	0.807768	0.76	0.17	0	0	0
1	Hk2	0	0.896684	0.847	0.197	0	0	0.781673	0.83	0.299	0	0	0
1	Pabpc1	0	0.891702	0.993	0.895	0	0	0.547227	0.993	0.896	0	0	0
1	Tmem86a	0	0.890786	0.844	0.228	0	0	0.550456	0.79	0.352	0	0	0
1	Ctsa	0	0.887046	0.975	0.701	0	0	0.565076	0.934	0.626	0	0	0
1	Ly9	0	0.880481	0.774	0.212	0	6.23726e-277	0.528941	0.665	0.309	2.47133e-272	6.23726e-277	0
1	Tlr7	0	0.87603	0.822	0.178	0	0	0.550268	0.694	0.242	0	0	0
1	Lhfpl2	0	0.874975	0.886	0.389	0	0	0.877445	0.847	0.353	0	0	0
1	Apbb1ip	0	0.867077	0.91	0.329	0	0	0.678136	0.914	0.465	0	0	0
1	Tlr2	0	0.865618	0.793	0.203	0	6.50738e-299	0.535309	0.8	0.383	2.57835e-294	6.50738e-299	0
1	Ikzf1	0	0.864415	0.88	0.262	0	0	0.603819	0.888	0.423	0	0	0
1	Fcgr4	0	0.86346	0.683	0.12	0	0	0.885909	0.781	0.246	0	0	0
1	Cd83	0	0.863366	0.942	0.334	0	0	0.434676	0.962	0.545	0	0	0
1	Man1c1	0	0.852633	0.81	0.212	0	0	0.493344	0.705	0.294	0	0	0
1	Ppfia4	0	0.832577	0.728	0.14	0	0	0.884313	0.908	0.355	0	0	0
1	Sdc3	0	0.83022	0.897	0.321	0	0	0.497225	0.917	0.532	0	0	0
1	Abcd2	0	0.829308	0.702	0.105	0	0	0.44075	0.441	0.113	0	0	0
1	Cd37	0	0.828464	0.874	0.242	0	0	0.648099	0.843	0.342	0	0	0
1	Sting1	0	0.827423	0.804	0.222	0	0	0.680309	0.826	0.333	0	0	0
1	Zfhx3	0	0.824945	0.795	0.221	0	0	0.747692	0.778	0.269	0	0	0
1	Kcnk6	0	0.816768	0.761	0.16	0	0	0.773557	0.759	0.216	0	0	0
1	Slc11a1	0	0.81148	0.77	0.181	0	0	0.879295	0.919	0.343	0	0	0
1	Pik3ap1	0	0.809513	0.814	0.211	0	0	0.660932	0.837	0.367	0	0	0
1	Rin2	0	0.806365	0.773	0.236	0	0	0.519208	0.626	0.246	0	0	0
1	Itm2b	0	0.803206	1	0.997	0	0	0.853541	0.999	0.991	0	0	0
1	Csf3r	0	0.797275	0.745	0.141	0	0	0.786915	0.89	0.326	0	0	0
1	Srgap2	0	0.79511	0.801	0.248	0	0	0.65749	0.783	0.298	0	0	0
1	Cd34	0	0.79463	0.623	0.071	0	0	0.907608	0.763	0.155	0	0	0
1	Myo1f	0	0.790524	0.865	0.269	0	1.20251e-218	0.35417	0.73	0.366	4.76457e-214	1.20251e-218	0
1	Pdyn	0	0.789462	0.484	0.031	0	0	0.547748	0.315	0.032	0	0	0
1	Abca9	0	0.786882	0.69	0.114	0	2.16474e-271	0.400905	0.429	0.135	8.57712e-267	2.16474e-271	0
1	Fcgr1	0	0.785311	0.773	0.181	0	0	0.584371	0.775	0.313	0	0	0
1	Ncf1	0	0.782909	0.877	0.287	0	0	0.529007	0.837	0.394	0	0	0
1	Il6ra	0	0.775244	0.805	0.236	0	0	0.587053	0.835	0.376	0	0	0
1	Pag1	0	0.768338	0.732	0.18	0	0	0.595888	0.669	0.226	0	0	0
1	Otulinl	0	0.767122	0.822	0.228	0	2.7254e-273	0.444016	0.738	0.354	1.07986e-268	2.7254e-273	0
1	Adora3	0	0.758221	0.573	0.046	0	0	0.852625	0.682	0.103	0	0	0
1	Cd86	0	0.753112	0.875	0.247	0	0	0.5803	0.833	0.344	0	0	0
1	Clec5a	0	0.744188	0.695	0.154	0	0	0.500204	0.562	0.195	0	0	0
1	Nckap1l	0	0.7337	0.854	0.266	0	0	0.539391	0.827	0.378	0	0	0
1	Lacc1	0	0.728026	0.729	0.19	0	0	0.544492	0.755	0.313	0	0	0
1	Ophn1	0	0.723101	0.665	0.111	0	0	0.579351	0.645	0.204	0	0	0
1	Adap2	0	0.721799	0.724	0.162	0	0	0.532725	0.668	0.25	0	0	0
1	Spint1	0	0.721655	0.638	0.093	0	0	0.685594	0.705	0.187	0	0	0
1	Pla2g15	0	0.715644	0.726	0.168	0	0	0.602553	0.677	0.219	0	0	0
1	Gcnt1	0	0.703394	0.645	0.104	0	0	0.479183	0.487	0.128	0	0	0
1	B4galt1	0	0.698523	0.808	0.231	0	0	0.477774	0.821	0.392	0	0	0
1	Basp1	0	0.697185	0.967	0.357	0	0	0.501412	0.978	0.553	0	0	0
1	Npnt	0	0.696747	0.533	0.043	0	0	0.823826	0.649	0.122	0	0	0
1	Inpp5d	0	0.695173	0.76	0.203	0	0	0.561121	0.814	0.347	0	0	0
1	Irf8	0	0.690402	0.92	0.332	0	0	0.498687	0.914	0.469	0	0	0
1	Ldhb	0	0.683997	0.684	0.141	0	0	0.844261	0.816	0.247	0	0	0
1	Blnk	0	0.66559	0.659	0.142	0	0	0.492684	0.615	0.21	0	0	0
1	Sall3	0	0.664987	0.505	0.039	0	0	0.692893	0.548	0.104	0	0	0
1	Pald1	0	0.626704	0.626	0.143	0	0	0.499659	0.551	0.163	0	0	0
1	Nrp1	0	0.626361	0.666	0.159	0	8.12794e-225	0.349035	0.556	0.232	3.22045e-220	8.12794e-225	0
1	Slamf9	0	0.619534	0.702	0.174	0	8.13986e-263	0.412597	0.706	0.323	3.22517e-258	8.13986e-263	0
1	Chst1	0	0.616888	0.516	0.046	0	0	0.419729	0.376	0.069	0	0	0
1	Slc7a8	0	0.61515	0.61	0.121	0	0	0.675208	0.784	0.274	0	0	0
1	St3gal6	0	0.608819	0.598	0.1	0	0	0.618892	0.694	0.195	0	0	0
1	Ncf2	0	0.599424	0.713	0.182	0	1.45118e-252	0.382181	0.666	0.298	5.74988e-248	1.45118e-252	0
1	Rhoh	0	0.58337	0.651	0.134	0	0	0.58152	0.72	0.24	0	0	0
1	Pon3	0	0.567778	0.595	0.116	0	0	0.435263	0.486	0.134	0	0	0
1	Rab3il1	0	0.563194	0.562	0.106	0	0	0.511805	0.519	0.134	0	0	0
1	Xlr	0	0.542716	0.488	0.049	0	0	0.312038	0.297	0.059	0	0	0
1	Mlph	0	0.504653	0.381	0.028	0	1.89689e-300	0.338533	0.286	0.056	7.51585e-296	1.89689e-300	0
1	Lrrc3	0	0.471826	0.412	0.039	0	0	0.774596	0.669	0.13	0	0	0
1	Siglecf	0	0.445914	0.314	0.024	0	0	0.594471	0.482	0.087	0	0	0
1	Rtn4rl1	0	0.352666	0.305	0.024	0	0	0.346131	0.332	0.067	0	0	0
1	Fgl2	3.98481e-305	0.966915	0.94	0.387	1.57886e-300	0	0.64068	0.918	0.51	0	3.98481e-305	0
1	Itga6	5.47674e-305	0.585941	0.577	0.121	2.16999e-300	0	0.527738	0.644	0.228	0	5.47674e-305	0
1	Cd300c2	1.07362e-304	0.605679	0.662	0.162	4.2539e-300	0	0.491591	0.751	0.313	0	1.07362e-304	0
1	Asah1	6.87844e-301	0.822887	0.968	0.587	2.72538e-296	0	0.56615	0.949	0.597	0	6.87844e-301	0
1	Cmtm6	1.4554e-298	0.800412	0.905	0.417	5.76659e-294	0	0.716818	0.889	0.431	0	1.4554e-298	0
1	Klhl6	2.41891e-298	0.508835	0.516	0.097	9.58419e-294	0	0.415748	0.501	0.158	0	2.41891e-298	0
1	Lat2	3.64677e-298	0.74703	0.756	0.223	1.44492e-293	0	0.558938	0.836	0.406	0	3.64677e-298	0
1	Prkcd	5.22236e-298	0.703517	0.886	0.3	2.0692e-293	0	0.463047	0.859	0.433	0	5.22236e-298	0
1	Smap2	1.53951e-294	0.84615	0.953	0.647	6.09986e-290	0	0.771438	0.952	0.599	0	1.53951e-294	0
1	Scn1b	1.43657e-293	0.564299	0.553	0.121	5.69199e-289	0	0.365749	0.386	0.094	0	1.43657e-293	0
1	Adcy7	9.92234e-293	0.637467	0.792	0.236	3.93143e-288	0	0.475695	0.763	0.35	0	9.92234e-293	0
1	Ecscr	2.06092e-291	0.309876	0.276	0.022	8.16577e-287	0	0.334863	0.282	0.052	0	2.06092e-291	0
1	Nectin4	1.06788e-289	0.398203	0.391	0.054	4.23117e-285	0	0.366678	0.357	0.078	0	1.06788e-289	0
1	Ifngr2	6.82343e-288	0.720052	0.838	0.307	2.70358e-283	0	0.530262	0.839	0.421	0	6.82343e-288	0
1	Fgd2	3.47812e-287	0.532847	0.528	0.107	1.3781e-282	0	0.555498	0.63	0.193	0	3.47812e-287	0
1	Treml2	1.3408e-286	0.48638	0.501	0.094	5.31253e-282	0	0.444946	0.5	0.159	0	1.3408e-286	0
1	Nav3	1.30022e-285	0.536181	0.405	0.061	5.15174e-281	0	0.484164	0.438	0.111	0	1.30022e-285	0
1	Selplg	2.42221e-282	0.61061	0.677	0.176	9.59728e-278	0	0.633292	0.808	0.326	0	2.42221e-282	0
1	Ly6e	1.5965e-281	0.883136	0.99	0.508	6.32564e-277	0	0.539497	0.996	0.749	0	1.5965e-281	0
1	Ivns1abp	1.13101e-280	0.897133	0.958	0.632	4.4813e-276	0	0.764442	0.968	0.656	0	1.13101e-280	0
1	B2m	2.10497e-279	0.425846	1	1	8.34033e-275	0	0.439197	1	0.995	0	2.10497e-279	0
1	Slc1a3	1.99293e-275	0.727441	0.75	0.272	7.89639e-271	0	0.546061	0.649	0.241	0	1.99293e-275	0
1	Camk1	4.30646e-274	0.659586	0.711	0.228	1.70631e-269	0	0.467589	0.631	0.244	0	4.30646e-274	0
1	Rasal3	2.95797e-272	0.438914	0.522	0.105	1.17201e-267	0	0.428203	0.585	0.185	0	2.95797e-272	0
1	Abi3	6.64865e-270	0.505303	0.55	0.121	2.63433e-265	0	0.465583	0.605	0.211	0	6.64865e-270	0
1	Rab27a	7.29902e-269	0.413104	0.434	0.074	2.89202e-264	0	0.384415	0.45	0.133	0	7.29902e-269	0
1	Syngr1	1.74779e-265	0.605222	0.564	0.136	6.9251e-261	0	0.464433	0.586	0.215	0	1.74779e-265	0
1	Cd36	6.80153e-264	0.468884	0.377	0.054	2.6949e-259	0	0.621751	0.453	0.091	0	6.80153e-264	0
1	Ntpcr	4.43083e-262	0.756061	0.737	0.271	1.75558e-257	0	0.592015	0.691	0.262	0	4.43083e-262	0
1	Hexa	2.48378e-261	0.736663	0.768	0.287	9.84123e-257	0	0.547692	0.733	0.298	0	2.48378e-261	0
1	Cyfip1	8.56325e-261	0.768702	0.942	0.646	3.39293e-256	0	0.726439	0.951	0.625	0	8.56325e-261	0
1	H2-D1	4.94162e-260	0.456385	1	0.998	1.95797e-255	0	0.430358	1	0.991	0	4.94162e-260	0
1	Psap	1.13708e-255	0.644967	1	0.98	4.50535e-251	0	0.537168	1	0.963	0	1.13708e-255	0
1	Spata13	8.90639e-255	0.662458	0.696	0.229	3.52889e-250	0	0.619388	0.803	0.341	0	8.90639e-255	0
1	Clta	4.56353e-251	0.704046	0.978	0.827	1.80816e-246	0	0.610999	0.966	0.729	0	4.56353e-251	0
1	Dtx4	6.26084e-249	0.569324	0.557	0.141	2.48067e-244	0	0.586771	0.679	0.243	0	6.26084e-249	0
1	H2-K1	6.47417e-249	0.54809	1	0.99	2.5652e-244	0	0.365305	0.999	0.969	0	6.47417e-249	0
1	Daglb	2.71685e-247	0.591572	0.676	0.225	1.07647e-242	0	0.58755	0.692	0.246	0	2.71685e-247	0
1	Frmd4a	1.62713e-246	0.697768	0.778	0.318	6.447e-242	0	0.457945	0.784	0.346	0	1.62713e-246	0
1	Parvg	3.0974e-246	0.545738	0.666	0.19	1.22725e-241	0	0.547002	0.783	0.347	0	3.0974e-246	0
1	Cd63	3.49502e-246	0.714821	0.992	0.89	1.3848e-241	0	0.620081	0.975	0.69	0	3.49502e-246	0
1	Scpep1	1.11628e-244	0.708422	0.952	0.56	4.42292e-240	0	0.475437	0.903	0.536	0	1.11628e-244	0
1	Man2b2	1.81769e-243	0.631724	0.714	0.258	7.20204e-239	0	0.627002	0.737	0.293	0	1.81769e-243	0
1	Gpr84	4.31997e-242	0.412732	0.332	0.046	1.71166e-237	0	0.340507	0.52	0.157	0	4.31997e-242	0
1	Gcnt2	1.15968e-234	0.454083	0.452	0.091	4.59489e-230	0	0.534698	0.577	0.204	0	1.15968e-234	0
1	Ints6l	2.04886e-229	0.717446	0.743	0.304	8.11801e-225	0	0.59638	0.682	0.276	0	2.04886e-229	0
1	Cox6a2	2.19569e-229	0.301744	0.255	0.026	8.69974e-225	0	0.465679	0.341	0.069	0	2.19569e-229	0
1	Efhd2	2.66487e-228	0.577322	0.738	0.252	1.05587e-223	0	0.499512	0.844	0.424	0	2.66487e-228	0
1	Pnpla7	8.92661e-228	0.498825	0.572	0.159	3.5369e-223	0	0.535086	0.726	0.303	0	8.92661e-228	0
1	P4ha1	4.49163e-226	0.689146	0.887	0.491	1.77967e-221	0	0.574593	0.811	0.441	0	4.49163e-226	0
1	Ccr5	3.1541e-222	0.697442	0.753	0.254	1.24972e-217	0	0.58129	0.88	0.472	0	3.1541e-222	0
1	Sparc	7.20629e-220	1.06836	0.941	0.665	2.85528e-215	0	1.43806	0.992	0.529	0	7.20629e-220	0
1	Dpy19l4	5.04916e-215	0.744686	0.801	0.416	2.00058e-210	0	0.608253	0.698	0.298	0	5.04916e-215	0
1	Rnase4	9.25732e-215	0.65607	0.908	0.458	3.66794e-210	0	0.558891	0.863	0.385	0	9.25732e-215	0
1	Scamp2	1.44409e-212	0.638591	0.837	0.43	5.72179e-208	0	0.563598	0.812	0.418	0	1.44409e-212	0
1	Slc16a6	1.12475e-208	0.600205	0.643	0.223	4.45647e-204	0	0.623617	0.718	0.286	0	1.12475e-208	0
1	Comt	6.07635e-208	0.676822	0.916	0.619	2.40757e-203	0	0.561751	0.867	0.524	0	6.07635e-208	0
1	Fam102b	2.42207e-204	0.556949	0.604	0.188	9.59672e-200	0	0.573224	0.723	0.295	0	2.42207e-204	0
1	Pfkfb3	3.73604e-202	0.472357	0.836	0.393	1.48029e-197	0	0.680042	0.857	0.412	0	3.73604e-202	0
1	Slc7a7	3.58221e-198	0.32859	0.344	0.062	1.41934e-193	0	0.507052	0.58	0.173	0	3.58221e-198	0
1	Ptprj	1.01922e-195	0.54512	0.757	0.307	4.03836e-191	0	0.508578	0.762	0.361	0	1.01922e-195	0
1	X1700017B05Rik	2.4309e-195	0.382572	0.426	0.096	9.63171e-191	0	0.481737	0.595	0.214	0	2.4309e-195	0
1	Naglu	1.7415e-193	0.478668	0.547	0.167	6.90019e-189	0	0.503053	0.592	0.22	0	1.7415e-193	0
1	Ccl2	2.56634e-189	0.735362	0.46	0.117	1.01683e-184	0	0.733902	0.538	0.179	0	2.56634e-189	0
1	Scoc	3.08292e-186	0.733511	0.933	0.75	1.22151e-181	0	0.686265	0.888	0.531	0	3.08292e-186	0
1	Fam217b	2.37655e-185	0.344666	0.351	0.069	9.41638e-181	0	0.443077	0.434	0.113	0	2.37655e-185	0
1	Ltc4s	2.89548e-181	0.324682	0.305	0.052	1.14725e-176	0	0.506607	0.455	0.106	0	2.89548e-181	0
1	Slc29a3	2.41931e-175	0.583315	0.784	0.407	9.58577e-171	0	0.525158	0.8	0.432	0	2.41931e-175	0
1	Tor3a	4.87728e-172	0.548935	0.651	0.252	1.93248e-167	0	0.589315	0.713	0.313	0	4.87728e-172	0
1	Cd81	3.81474e-166	0.564528	0.998	0.874	1.51147e-161	0	0.872308	0.996	0.668	0	3.81474e-166	0
1	Ccni	2.15153e-165	0.531792	0.954	0.822	8.52478e-161	0	0.568527	0.955	0.753	0	2.15153e-165	0
1	Lgals9	1.74257e-164	0.592441	0.881	0.519	6.90441e-160	0	0.551603	0.918	0.581	0	1.74257e-164	0
1	Cxcl13	2.78581e-163	1.18587	0.203	0.025	1.1038e-158	0	1.31454	0.301	0.05	0	2.78581e-163	0
1	Tanc2	3.2953e-162	0.530649	0.609	0.236	1.30566e-157	0	0.728406	0.772	0.281	0	3.2953e-162	0
1	Itm2c	2.84305e-157	0.53684	0.912	0.687	1.12647e-152	0	0.545136	0.968	0.788	0	2.84305e-157	0
1	Ywhah	1.73938e-154	0.510296	0.957	0.774	6.89176e-150	0	0.502758	0.958	0.767	0	1.73938e-154	0
1	Plxdc2	1.62819e-152	0.682159	0.927	0.627	6.45121e-148	0	0.85929	0.927	0.402	0	1.62819e-152	0
1	Cd9	6.88568e-136	0.526767	0.995	0.854	2.72824e-131	0	0.482469	0.99	0.767	0	6.88568e-136	0
1	Adgrg1	1.14085e-116	0.389766	0.396	0.13	4.52029e-112	0	0.589198	0.62	0.199	0	1.14085e-116	0
1	Lamp2	1.51255e-111	0.366524	0.991	0.926	5.99301e-107	0	0.447931	0.981	0.815	0	1.51255e-111	0
1	Cttnbp2nl	4.24697e-110	0.474266	0.881	0.644	1.68273e-105	0	0.533518	0.858	0.513	0	4.24697e-110	0
1	Rasgrp3	2.23722e-83	0.436468	0.867	0.608	8.86433e-79	0	0.603064	0.834	0.408	0	2.23722e-83	0
1	Capza2	7.11287e-208	0.618479	0.97	0.783	2.81826e-203	9.34291e-308	0.459838	0.953	0.75	3.70185e-303	7.11287e-208	1.86858e-307
1	Axl	1.32775e-307	0.748661	0.893	0.289	5.2608e-303	5.67503e-285	0.466475	0.91	0.498	2.24856e-280	5.67503e-285	2.65549e-307
1	Trpm2	1.20654e-172	0.438282	0.496	0.141	4.78057e-168	2.0266e-306	0.44911	0.509	0.174	8.02978e-302	1.20654e-172	4.05319e-306
1	C5ar1	4.831e-163	0.390616	0.482	0.136	1.91414e-158	2.35601e-305	0.396016	0.632	0.241	9.33499e-301	4.831e-163	4.71202e-305
1	Gnas	5.39875e-186	0.609332	0.999	0.985	2.13909e-181	4.73155e-304	0.425469	0.995	0.969	1.87473e-299	5.39875e-186	9.46309e-304
1	Cyp4v3	4.78042e-303	0.649145	0.715	0.196	1.8941e-298	1.2387e-256	0.395658	0.544	0.214	4.90797e-252	1.2387e-256	9.56084e-303
1	Lcp2	5.7445e-302	0.60887	0.689	0.176	2.27608e-297	8.83574e-256	0.402151	0.652	0.289	3.5009e-251	8.83574e-256	1.1489e-301
1	Tnfrsf21	8.35014e-302	0.560001	0.662	0.162	3.30849e-297	4.11778e-277	0.37698	0.637	0.267	1.63155e-272	4.11778e-277	1.67003e-301
1	Tifab	4.52597e-301	0.596463	0.64	0.15	1.79328e-296	4.72055e-275	0.434434	0.619	0.259	1.87038e-270	4.72055e-275	9.05193e-301
1	Naip5	8.57626e-300	0.532001	0.555	0.113	3.39809e-295	2.09379e-285	0.40119	0.487	0.166	8.29602e-281	2.09379e-285	1.71525e-299
1	Il10rb	1.7527e-298	0.704249	0.865	0.285	6.94454e-294	6.45867e-182	0.308877	0.692	0.356	2.55906e-177	6.45867e-182	3.50539e-298
1	Rps29	5.96424e-298	0.858621	1	0.974	2.36315e-293	5.62833e-217	0.35498	0.999	0.966	2.23006e-212	5.62833e-217	1.19285e-297
1	Ang	9.03098e-244	0.523864	0.617	0.17	3.57825e-239	8.57393e-297	0.416387	0.611	0.238	3.39716e-292	9.03098e-244	1.71479e-296
1	Fmnl3	2.48373e-273	0.456868	0.485	0.093	9.84104e-269	1.2389e-294	0.389317	0.478	0.157	4.90878e-290	2.48373e-273	2.47781e-294
1	Il10ra	1.77433e-255	0.579522	0.663	0.187	7.03025e-251	3.87445e-293	0.449889	0.829	0.41	1.53513e-288	1.77433e-255	7.7489e-293
1	Snx5	1.08566e-285	0.825215	0.986	0.763	4.3016e-281	4.66443e-292	0.439065	0.976	0.75	1.84814e-287	1.08566e-285	9.32886e-292
1	Bhlhe41	3.51632e-40	0.324548	0.698	0.515	1.39324e-35	4.25075e-290	0.53446	0.629	0.288	1.68423e-285	3.51632e-40	8.5015e-290
1	Cmklr1	4.72849e-272	0.598358	0.706	0.193	1.87352e-267	1.34739e-289	0.445201	0.713	0.314	5.33864e-285	4.72849e-272	2.69478e-289
1	Macf1	3.55946e-213	0.63749	0.97	0.754	1.41033e-208	3.97913e-289	0.449393	0.948	0.719	1.57661e-284	3.55946e-213	7.95826e-289
1	Pmepa1	5.78553e-193	0.640375	0.872	0.488	2.29234e-188	1.0029e-287	0.468538	0.829	0.458	3.97368e-283	5.78553e-193	2.00579e-287
1	Fbrsl1	4.20446e-116	0.473158	0.68	0.361	1.66589e-111	8.34471e-287	0.467247	0.767	0.402	3.30634e-282	4.20446e-116	1.66894e-286
1	Etv5	1.43385e-285	0.470459	0.471	0.084	5.68121e-281	4.21243e-275	0.366802	0.414	0.126	1.66905e-270	4.21243e-275	2.86771e-285
1	Cd22	4.20481e-285	0.552001	0.607	0.139	1.66603e-280	2.44772e-247	0.332341	0.393	0.122	9.69837e-243	2.44772e-247	8.40962e-285
1	Plxnb2	9.58996e-226	0.398885	0.446	0.093	3.79973e-221	1.60524e-284	0.367019	0.445	0.14	6.36029e-280	9.58996e-226	3.21048e-284
1	AU020206	6.46069e-284	0.762355	0.932	0.429	2.55986e-279	5.69142e-253	0.39897	0.849	0.484	2.25506e-248	5.69142e-253	1.29214e-283
1	Tnfsf13b	1.89354e-248	0.427848	0.455	0.091	7.50258e-244	2.50818e-283	0.330386	0.37	0.099	9.93789e-279	1.89354e-248	5.01635e-283
1	Sgpl1	3.37557e-277	0.791441	0.97	0.626	1.33747e-272	1.99446e-282	0.45925	0.904	0.613	7.90244e-278	3.37557e-277	3.98892e-282
1	Ttc28	2.07437e-182	0.390065	0.444	0.112	8.21905e-178	2.63018e-282	0.400527	0.451	0.148	1.04213e-277	2.07437e-182	5.26036e-282
1	Slc15a3	1.14705e-258	0.517579	0.555	0.128	4.54483e-254	4.37857e-281	0.465434	0.641	0.273	1.73488e-276	1.14705e-258	8.75715e-281
1	Gm44250	1.06856e-279	0.541677	0.52	0.105	4.23386e-275	9.83625e-246	0.340159	0.359	0.105	3.89732e-241	9.83625e-246	2.13712e-279
1	Plcg2	5.97804e-278	0.581851	0.687	0.188	2.36862e-273	1.21961e-263	0.400701	0.665	0.3	4.83235e-259	1.21961e-263	1.19561e-277
1	Slc36a1	1.05797e-206	0.521823	0.623	0.201	4.19189e-202	7.57792e-278	0.403212	0.53	0.199	3.00252e-273	1.05797e-206	1.51558e-277
1	Pik3cg	2.96853e-267	0.567541	0.636	0.166	1.17619e-262	8.35615e-278	0.400286	0.551	0.208	3.31087e-273	2.96853e-267	1.67123e-277
1	Celf2	1.12428e-277	0.715066	0.934	0.35	4.45461e-273	2.3991e-194	0.331306	0.908	0.573	9.5057e-190	2.3991e-194	2.24855e-277
1	Ssh2	1.612e-202	0.708148	0.847	0.446	6.38708e-198	3.13621e-277	0.491777	0.801	0.445	1.24263e-272	1.612e-202	6.27242e-277
1	Icosl	1.03408e-180	0.419682	0.542	0.156	4.09722e-176	2.50278e-276	0.384268	0.581	0.225	9.9165e-272	1.03408e-180	5.00555e-276
1	Trappc14	3.27544e-206	0.480035	0.506	0.134	1.29779e-201	4.51283e-275	0.393612	0.425	0.135	1.78807e-270	3.27544e-206	9.02566e-275
1	Ccl6	1.47547e-246	0.463446	0.558	0.129	5.84609e-242	4.88836e-274	0.367124	0.546	0.203	1.93687e-269	1.47547e-246	9.77673e-274
1	Adam10	4.08464e-65	0.350035	0.899	0.781	1.61841e-60	1.79438e-273	0.490259	0.881	0.631	7.10969e-269	4.08464e-65	3.58876e-273
1	Gusb	2.64306e-218	0.698272	0.857	0.402	1.04724e-213	1.9281e-273	0.477366	0.817	0.463	7.63952e-269	2.64306e-218	3.8562e-273
1	Itpripl2	1.70075e-216	0.571522	0.701	0.246	6.73871e-212	6.87137e-272	0.411024	0.621	0.26	2.72257e-267	1.70075e-216	1.37427e-271
1	Cd52	3.23829e-269	0.710278	0.907	0.345	1.28307e-264	6.17157e-198	0.35638	0.947	0.614	2.4453e-193	6.17157e-198	6.47657e-269
1	H2-Q7	8.31252e-217	0.623978	0.958	0.617	3.29359e-212	6.3963e-266	0.379798	0.953	0.674	2.53434e-261	8.31252e-217	1.27926e-265
1	Zfas1	4.90046e-153	0.592603	0.884	0.611	1.94166e-148	5.07598e-265	0.493434	0.923	0.679	2.0112e-260	4.90046e-153	1.0152e-264
1	Mgat4a	5.23359e-264	0.592375	0.663	0.193	2.07365e-259	5.69951e-263	0.401898	0.599	0.248	2.25826e-258	5.69951e-263	1.04672e-263
1	Tpp1	1.00826e-195	0.605457	0.963	0.76	3.99492e-191	3.92931e-263	0.460129	0.902	0.636	1.55687e-258	1.00826e-195	7.85862e-263
1	Rrbp1	2.17128e-194	0.620353	0.897	0.546	8.60305e-190	1.42351e-260	0.441308	0.846	0.524	5.64023e-256	2.17128e-194	2.84702e-260
1	Ski	1.22523e-141	0.519838	0.84	0.539	4.85461e-137	1.97326e-260	0.444178	0.875	0.573	7.81844e-256	1.22523e-141	3.94652e-260
1	Npc2	9.54332e-260	0.755945	0.998	0.839	3.78125e-255	4.14941e-231	0.357285	0.991	0.833	1.64408e-226	4.14941e-231	1.90866e-259
1	Gm2a	4.86427e-161	0.510498	0.853	0.505	1.92732e-156	1.57311e-257	0.39556	0.939	0.694	6.23296e-253	4.86427e-161	3.14621e-257
1	Ttyh3	6.05098e-157	0.411485	0.694	0.273	2.39752e-152	1.94481e-257	0.422746	0.801	0.442	7.70574e-253	6.05098e-157	3.88962e-257
1	Clip1	6.15805e-170	0.508672	0.687	0.282	2.43994e-165	7.29702e-255	0.426496	0.649	0.3	2.89123e-250	6.15805e-170	1.4594e-254
1	Il13ra1	1.96827e-231	0.491481	0.539	0.134	7.79868e-227	3.11027e-254	0.360077	0.476	0.169	1.23235e-249	1.96827e-231	6.22053e-254
1	Rpl35a	3.6529e-254	0.751837	0.999	0.921	1.44735e-249	1.81685e-187	0.324909	0.997	0.94	7.19874e-183	1.81685e-187	7.30579e-254
1	I830077J02Rik	3.24824e-228	0.372183	0.37	0.061	1.28702e-223	1.02033e-253	0.335928	0.394	0.12	4.04275e-249	3.24824e-228	2.04066e-253
1	Nuak1	9.45931e-127	0.494817	0.625	0.301	3.74797e-122	1.58561e-253	0.460846	0.502	0.198	6.28249e-249	9.45931e-127	3.17121e-253
1	Smim3	1.97472e-192	0.495346	0.622	0.205	7.82422e-188	4.06521e-252	0.437813	0.735	0.372	1.61072e-247	1.97472e-192	8.13043e-252
1	Hvcn1	5.79149e-201	0.414408	0.485	0.122	2.29471e-196	8.86966e-251	0.356984	0.454	0.157	3.51434e-246	5.79149e-201	1.77393e-250
1	Pitpnc1	1.65137e-237	0.505449	0.497	0.109	6.54305e-233	1.61007e-250	0.371723	0.516	0.193	6.37943e-246	1.65137e-237	3.22015e-250
1	Cotl1	2.3686e-248	0.642403	0.77	0.269	9.38485e-244	4.08593e-243	0.410839	0.785	0.415	1.61893e-238	4.08593e-243	4.73719e-248
1	Akap13	2.73255e-247	0.605137	0.83	0.304	1.08269e-242	1.57003e-217	0.323466	0.776	0.41	6.22075e-213	1.57003e-217	5.46511e-247
1	Acp2	1.27047e-182	0.588407	0.878	0.527	5.03385e-178	2.79042e-247	0.42071	0.83	0.499	1.10562e-242	1.27047e-182	5.58085e-247
1	Vcam1	8.06997e-247	0.374417	0.577	0.139	3.19749e-242	6.23288e-239	0.313117	0.398	0.127	2.46959e-234	6.23288e-239	1.61399e-246
1	Slc31a1	5.48522e-222	0.580865	0.647	0.211	2.17335e-217	4.27228e-246	0.417093	0.581	0.254	1.69276e-241	5.48522e-222	8.54457e-246
1	ENSMUSG00000121092	6.23122e-246	0.482402	0.546	0.127	2.46893e-241	5.20112e-203	0.318455	0.471	0.185	2.06079e-198	5.20112e-203	1.24624e-245
1	Gtf2h2	5.94806e-113	0.37552	0.453	0.171	2.35674e-108	2.01683e-245	0.377087	0.494	0.19	7.99108e-241	5.94806e-113	4.03366e-245
1	Rab11fip5	2.76868e-192	0.341565	0.372	0.074	1.09701e-187	3.26912e-245	0.361648	0.409	0.134	1.29529e-240	2.76868e-192	6.53824e-245
1	Znrf2	1.18466e-244	0.619756	0.778	0.282	4.69385e-240	2.9214e-244	0.403782	0.692	0.34	1.15752e-239	2.9214e-244	2.36931e-244
1	Sipa1l2	5.40659e-173	0.400731	0.459	0.129	2.1422e-168	1.23838e-244	0.342058	0.395	0.129	4.9067e-240	5.40659e-173	2.47675e-244
1	Acer3	2.11283e-194	0.548894	0.617	0.214	8.37144e-190	1.72895e-244	0.40066	0.56	0.236	6.85046e-240	2.11283e-194	3.45791e-244
1	Aim2	1.37443e-154	0.437002	0.562	0.201	5.44575e-150	8.01062e-244	0.391166	0.601	0.264	3.17397e-239	1.37443e-154	1.60212e-243
1	H2-DMa	6.42996e-243	0.596906	0.693	0.217	2.54768e-238	2.61518e-222	0.375261	0.663	0.319	1.03618e-217	2.61518e-222	1.28599e-242
1	Ehd4	6.85676e-243	0.596319	0.784	0.288	2.71679e-238	6.93905e-211	0.362981	0.718	0.373	2.74939e-206	6.93905e-211	1.37135e-242
1	Cmtm3	7.97921e-192	0.4747	0.624	0.211	3.16152e-187	2.26016e-242	0.376162	0.638	0.291	8.95521e-238	7.97921e-192	4.52032e-242
1	Spi1	4.11787e-241	0.571606	0.764	0.253	1.63158e-236	5.39142e-219	0.347244	0.757	0.383	2.13619e-214	5.39142e-219	8.23574e-241
1	Tpst2	1.04867e-240	0.649913	0.782	0.306	4.15503e-236	1.39374e-236	0.395601	0.734	0.382	5.52226e-232	1.39374e-236	2.09733e-240
1	Rhoq	9.73645e-143	0.497142	0.713	0.359	3.85777e-138	4.452e-238	0.401273	0.61	0.283	1.76397e-233	9.73645e-143	8.90399e-238
1	Nucb1	5.57398e-103	0.417388	0.658	0.359	2.20852e-98	6.58404e-238	0.426874	0.806	0.505	2.60873e-233	5.57398e-103	1.31681e-237
1	Sp110	1.28716e-236	0.614853	0.847	0.307	5.09997e-232	7.96732e-190	0.327652	0.839	0.482	3.15681e-185	7.96732e-190	2.57431e-236
1	Dock2	5.79011e-208	0.459839	0.676	0.216	2.29416e-203	3.90942e-236	0.337306	0.672	0.309	1.54899e-231	5.79011e-208	7.81884e-236
1	H2-Q6	2.73823e-212	0.501558	0.767	0.276	1.08494e-207	3.57444e-235	0.370096	0.829	0.449	1.41627e-230	2.73823e-212	7.14888e-235
1	Ctsf	9.92323e-72	0.350555	0.537	0.287	3.93178e-67	9.77525e-235	0.403812	0.51	0.211	3.87315e-230	9.92323e-72	1.95505e-234
1	Col27a1	1.40561e-178	0.354608	0.294	0.05	5.56932e-174	2.77501e-233	0.36836	0.355	0.108	1.09951e-228	1.40561e-178	5.55001e-233
1	Hsp90b1	4.55304e-108	0.402919	0.996	0.982	1.80401e-103	1.09955e-231	0.379194	0.984	0.93	4.35662e-227	4.55304e-108	2.19909e-231
1	Ucp2	1.62042e-231	0.635438	0.935	0.395	6.42042e-227	1.21584e-192	0.333815	0.981	0.657	4.81741e-188	1.21584e-192	3.24084e-231
1	Pdgfb	1.52172e-190	0.382724	0.387	0.081	6.02935e-186	1.72909e-231	0.358571	0.448	0.159	6.85101e-227	1.52172e-190	3.45819e-231
1	Camk1d	6.4268e-202	0.459011	0.545	0.146	2.54643e-197	4.34325e-231	0.376397	0.564	0.24	1.72088e-226	6.4268e-202	8.6865e-231
1	Skil	2.41064e-229	0.674158	0.912	0.448	9.55144e-225	2.1429e-169	0.313697	0.931	0.638	8.49061e-165	2.1429e-169	4.82128e-229
1	Sppl2a	5.23656e-108	0.4471	0.923	0.777	2.07483e-103	2.7552e-229	0.436817	0.913	0.69	1.09166e-224	5.23656e-108	5.51039e-229
1	Btk	1.38497e-228	0.487706	0.576	0.155	5.48753e-224	7.62518e-226	0.337722	0.492	0.191	3.02125e-221	7.62518e-226	2.76994e-228
1	Arhgap25	2.70818e-228	0.473452	0.541	0.135	1.07304e-223	1.34335e-203	0.330516	0.502	0.206	5.32263e-199	1.34335e-203	5.41637e-228
1	Pkig	1.66022e-88	0.362622	0.63	0.344	6.57813e-84	3.28893e-227	0.390253	0.598	0.277	1.30314e-222	1.66022e-88	6.57786e-227
1	Fermt3	6.72541e-212	0.447276	0.566	0.154	2.66474e-207	2.50041e-224	0.340178	0.584	0.251	9.90713e-220	6.72541e-212	5.00082e-224
1	Nek7	1.65402e-91	0.39227	0.872	0.672	6.55356e-87	7.38562e-224	0.413529	0.85	0.576	2.92633e-219	1.65402e-91	1.47712e-223
1	Runx1	7.67396e-224	0.609808	0.711	0.242	3.04058e-219	2.11118e-186	0.33996	0.616	0.297	8.36492e-182	2.11118e-186	1.53479e-223
1	Acsl4	8.27949e-126	0.440682	0.579	0.244	3.2805e-121	1.47455e-223	0.397417	0.554	0.246	5.84245e-219	8.27949e-126	2.94909e-223
1	Csf2rb	4.98489e-187	0.383005	0.715	0.239	1.97512e-182	2.78526e-223	0.333663	0.823	0.43	1.10358e-218	4.98489e-187	5.57052e-223
1	Sipa1	5.92723e-223	0.507146	0.676	0.216	2.34849e-218	6.02228e-183	0.309037	0.558	0.257	2.38615e-178	6.02228e-183	1.18545e-222
1	Hck	1.19805e-222	0.527082	0.728	0.236	4.74691e-218	8.30429e-211	0.343728	0.758	0.391	3.29032e-206	8.30429e-211	2.3961e-222
1	Gmip	2.79473e-175	0.403198	0.494	0.14	1.10733e-170	4.23906e-222	0.351313	0.587	0.256	1.6796e-217	2.79473e-175	8.47812e-222
1	Nfe2l2	1.13139e-199	0.632845	0.921	0.598	4.48281e-195	6.85151e-222	0.379077	0.908	0.568	2.7147e-217	1.13139e-199	1.3703e-221
1	Ssr4	4.04379e-90	0.394141	0.636	0.358	1.60223e-85	3.02739e-221	0.408951	0.807	0.514	1.19951e-216	4.04379e-90	6.05477e-221
1	Gpr157	2.3013e-209	0.621847	0.578	0.168	9.11821e-205	1.02053e-219	0.437401	0.475	0.187	4.04353e-215	2.3013e-209	2.04106e-219
1	Tbc1d9	1.76835e-219	0.521394	0.675	0.213	7.00654e-215	3.58095e-191	0.318749	0.64	0.308	1.41884e-186	3.58095e-191	3.53669e-219
1	Akr1b10	1.54054e-210	0.423445	0.472	0.111	6.10393e-206	3.12734e-219	0.314561	0.4	0.138	1.23912e-214	1.54054e-210	6.25469e-219
1	ENSMUSG00000120224	1.96789e-168	0.512419	0.541	0.187	7.79717e-164	8.86402e-219	0.351571	0.42	0.155	3.5121e-214	1.96789e-168	1.7728e-218
1	Trim30a	7.95076e-218	0.67469	0.902	0.384	3.15025e-213	6.35131e-212	0.374304	0.904	0.549	2.51651e-207	6.35131e-212	1.59015e-217
1	Sema4d	1.64145e-166	0.563154	0.89	0.568	6.50375e-162	4.14558e-215	0.379748	0.899	0.616	1.64256e-210	1.64145e-166	8.29117e-215
1	Mfsd1	1.70831e-214	0.622305	0.851	0.418	6.76867e-210	3.22184e-169	0.339491	0.722	0.424	1.27656e-164	3.22184e-169	3.41662e-214
1	Elk3	2.20783e-214	0.465427	0.548	0.145	8.74785e-210	7.11325e-191	0.318401	0.565	0.256	2.81841e-186	7.11325e-191	4.41565e-214
1	Coa5	8.44841e-86	0.300623	0.545	0.26	3.34743e-81	8.71044e-213	0.397068	0.74	0.44	3.45125e-208	8.44841e-86	1.74209e-212
1	Amz1	1.17863e-189	0.364724	0.384	0.08	4.66996e-185	2.59408e-212	0.336589	0.437	0.164	1.02783e-207	1.17863e-189	5.18816e-212
1	Ncstn	3.21924e-97	0.410769	0.753	0.478	1.27553e-92	5.40091e-211	0.405194	0.814	0.549	2.13995e-206	3.21924e-97	1.08018e-210
1	Hps3	5.42711e-150	0.465097	0.557	0.205	2.15033e-145	4.96188e-206	0.33121	0.48	0.196	1.966e-201	5.42711e-150	9.92376e-206
1	Sec14l1	1.63969e-85	0.370778	0.703	0.431	6.49678e-81	1.03171e-205	0.390415	0.667	0.358	4.08784e-201	1.63969e-85	2.06342e-205
1	Cd2ap	3.39844e-159	0.543078	0.819	0.44	1.34653e-154	4.04416e-205	0.391815	0.718	0.402	1.60238e-200	3.39844e-159	8.08833e-205
1	Slc25a5	7.98857e-158	0.529376	0.948	0.809	3.16523e-153	2.70682e-204	0.353976	0.952	0.814	1.0725e-199	7.98857e-158	5.41364e-204
1	Rps11	1.95495e-173	0.586895	0.915	0.567	7.7459e-169	3.44184e-204	0.325284	0.995	0.918	1.36372e-199	1.95495e-173	6.88367e-204
1	Dock8	1.31176e-189	0.446214	0.701	0.239	5.19747e-185	3.72366e-204	0.327101	0.702	0.347	1.47539e-199	1.31176e-189	7.44731e-204
1	Fuca2	3.53713e-165	0.52287	0.735	0.336	1.40148e-160	4.09671e-203	0.370034	0.631	0.324	1.6232e-198	3.53713e-165	8.19343e-203
1	Tor1aip1	3.42673e-109	0.44784	0.937	0.8	1.35774e-104	3.0294e-200	0.398596	0.924	0.734	1.20031e-195	3.42673e-109	6.05881e-200
1	Bach1	2.05318e-65	0.349912	0.682	0.435	8.13512e-61	4.73961e-200	0.443693	0.749	0.45	1.87793e-195	2.05318e-65	9.47922e-200
1	Fli1	2.63745e-199	0.432545	0.554	0.152	1.04501e-194	2.39272e-194	0.326345	0.58	0.264	9.48045e-190	2.39272e-194	5.27491e-199
1	Tlr3	1.20758e-120	0.420306	0.503	0.196	4.78467e-116	3.82042e-199	0.331033	0.39	0.144	1.51373e-194	1.20758e-120	7.64084e-199
1	Ppm1h	1.32488e-170	0.445268	0.576	0.193	5.24946e-166	1.32997e-198	0.333297	0.529	0.233	5.26963e-194	1.32488e-170	2.65995e-198
1	Oxct1	5.08591e-132	0.54071	0.903	0.696	2.01514e-127	5.60337e-198	0.41469	0.825	0.554	2.22017e-193	5.08591e-132	1.12067e-197
1	Pbxip1	1.10689e-115	0.348886	0.501	0.192	4.3857e-111	1.34164e-197	0.335856	0.573	0.267	5.31584e-193	1.10689e-115	2.68327e-197
1	Erp29	6.60582e-161	0.509842	0.783	0.403	2.61736e-156	2.19841e-197	0.368339	0.743	0.435	8.71053e-193	6.60582e-161	4.39682e-197
1	Prkcb	2.76966e-107	0.416228	0.713	0.404	1.09739e-102	2.39906e-197	0.370354	0.669	0.359	9.50554e-193	2.76966e-107	4.79811e-197
1	Pdia3	1.03585e-123	0.466549	0.972	0.911	4.10425e-119	3.22487e-196	0.356838	0.958	0.83	1.27776e-191	1.03585e-123	6.44974e-196
1	Mlec	5.90341e-71	0.343041	0.654	0.405	2.33905e-66	8.5682e-196	0.389554	0.698	0.405	3.39489e-191	5.90341e-71	1.71364e-195
1	Man1a2	3.11301e-75	0.381883	0.787	0.566	1.23344e-70	4.2034e-194	0.384365	0.759	0.46	1.66547e-189	3.11301e-75	8.4068e-194
1	ENSMUSG00000120992	1.34202e-157	0.363177	0.443	0.121	5.31733e-153	1.07986e-193	0.338385	0.497	0.208	4.27863e-189	1.34202e-157	2.15973e-193
1	Bsg	4.695e-95	0.3616	0.714	0.434	1.86025e-90	1.50943e-193	0.378742	0.778	0.516	5.98068e-189	4.695e-95	3.01887e-193
1	Ptms	1.61915e-171	0.571873	0.865	0.492	6.41541e-167	5.09934e-192	0.360753	0.859	0.576	2.02046e-187	1.61915e-171	1.01987e-191
1	Acod1	1.63392e-191	0.681889	0.451	0.109	6.47392e-187	5.52001e-134	0.50904	0.368	0.163	2.18714e-129	5.52001e-134	3.26784e-191
1	Tgs1	6.32068e-65	0.34297	0.714	0.471	2.50438e-60	6.62085e-191	0.404675	0.659	0.372	2.62331e-186	6.32068e-65	1.32417e-190
1	Ch25h	9.55987e-191	0.481728	0.232	0.027	3.78781e-186	6.86556e-97	0.333099	0.139	0.039	2.72027e-92	6.86556e-97	1.91197e-190
1	Parp9	9.32365e-85	0.425406	0.788	0.537	3.69422e-80	5.53505e-190	0.391852	0.771	0.467	2.1931e-185	9.32365e-85	1.10701e-189
1	Abhd17c	3.12891e-98	0.373962	0.53	0.244	1.23974e-93	2.09783e-187	0.349962	0.487	0.219	8.31202e-183	3.12891e-98	4.19566e-187
1	Gdi2	4.94716e-130	0.419299	0.977	0.896	1.96016e-125	2.7457e-187	0.330663	0.962	0.84	1.0879e-182	4.94716e-130	5.49141e-187
1	Nrros	1.23992e-186	0.471319	0.711	0.249	4.9128e-182	5.35957e-177	0.300665	0.697	0.361	2.12357e-172	5.35957e-177	2.47983e-186
1	Rpl21	9.99033e-178	0.564354	0.888	0.531	3.95837e-173	6.73292e-186	0.310152	0.976	0.844	2.66772e-181	9.99033e-178	1.34658e-185
1	Diaph2	2.50051e-135	0.495255	0.688	0.328	9.90753e-131	8.08755e-186	0.365196	0.605	0.311	3.20445e-181	2.50051e-135	1.61751e-185
1	Cyrib	2.57787e-164	0.512781	0.922	0.672	1.0214e-159	2.30625e-185	0.318713	0.931	0.71	9.13784e-181	2.57787e-164	4.61251e-185
1	Leprot	1.5673e-53	0.309719	0.754	0.571	6.20994e-49	2.72944e-185	0.367943	0.79	0.528	1.08146e-180	1.5673e-53	5.45888e-185
1	Tcirg1	8.98861e-168	0.421979	0.573	0.195	3.56147e-163	8.19333e-185	0.335524	0.665	0.348	3.24636e-180	8.98861e-168	1.63867e-184
1	Rtcb	1.29636e-129	0.471198	0.746	0.421	5.13642e-125	5.42186e-184	0.379653	0.808	0.554	2.14825e-179	1.29636e-129	1.08437e-183
1	Herc2	6.6544e-76	0.388484	0.722	0.483	2.63661e-71	5.57532e-184	0.379572	0.636	0.349	2.20905e-179	6.6544e-76	1.11506e-183
1	Rpl10a	3.94101e-143	0.416134	0.586	0.227	1.56151e-138	1.60929e-183	0.34318	0.744	0.439	6.37633e-179	3.94101e-143	3.21858e-183
1	Rab20	6.96802e-130	0.366391	0.475	0.155	2.76087e-125	3.04014e-183	0.318859	0.574	0.265	1.20456e-178	6.96802e-130	6.08028e-183
1	Tnfrsf11a	1.87278e-157	0.388005	0.468	0.133	7.42034e-153	3.33246e-183	0.311042	0.414	0.162	1.32039e-178	1.87278e-157	6.66492e-183
1	Rap1b	1.52252e-167	0.497296	0.964	0.752	6.03254e-163	3.04777e-182	0.317158	0.964	0.774	1.20759e-177	1.52252e-167	6.09555e-182
1	Usp8	2.05808e-91	0.411149	0.83	0.609	8.15451e-87	1.0329e-181	0.383378	0.781	0.519	4.09257e-177	2.05808e-91	2.06581e-181
1	Slc25a45	4.61462e-108	0.392922	0.538	0.231	1.82841e-103	1.31612e-181	0.305751	0.462	0.196	5.21475e-177	4.61462e-108	2.63225e-181
1	Serpina3f	6.41324e-154	0.308705	0.271	0.049	2.54106e-149	4.46428e-180	0.396832	0.3	0.096	1.76884e-175	6.41324e-154	8.92857e-180
1	Laptm4a	1.08911e-86	0.326809	0.974	0.894	4.31525e-82	1.86386e-178	0.311213	0.964	0.824	7.385e-174	1.08911e-86	3.72773e-178
1	Serpine1	4.28178e-176	0.813745	0.409	0.099	1.69653e-171	2.7291e-149	0.470198	0.281	0.096	1.08132e-144	2.7291e-149	8.56356e-176
1	Ptpn1	4.39842e-166	0.577424	0.824	0.46	1.74274e-161	1.14099e-174	0.354572	0.782	0.492	4.52085e-170	4.39842e-166	2.28199e-174
1	Srsf9	3.07647e-90	0.41631	0.648	0.369	1.21896e-85	2.90659e-173	0.349673	0.756	0.48	1.15165e-168	3.07647e-90	5.81319e-173
1	Trim30d	7.31039e-167	0.516397	0.673	0.245	2.89652e-162	1.13213e-170	0.343861	0.674	0.355	4.48573e-166	7.31039e-167	2.26426e-170
1	Camk2d	6.48049e-134	0.418659	0.598	0.249	2.5677e-129	2.02059e-168	0.323996	0.537	0.261	8.006e-164	6.48049e-134	4.04119e-168
1	Morc3	4.0711e-156	0.499692	0.732	0.334	1.61305e-151	2.92781e-168	0.341718	0.631	0.338	1.16006e-163	4.0711e-156	5.85561e-168
1	Irf2bp2	1.60369e-92	0.41193	0.945	0.821	6.35415e-88	9.29325e-164	0.323895	0.943	0.755	3.68217e-159	1.60369e-92	1.85865e-163
1	Rassf4	4.28812e-53	0.306792	0.758	0.53	1.69904e-48	1.87938e-161	0.332644	0.686	0.392	7.44647e-157	4.28812e-53	3.75876e-161
1	Bri3	3.70818e-104	0.432206	0.765	0.479	1.46926e-99	2.79967e-161	0.325642	0.862	0.614	1.10929e-156	3.70818e-104	5.59935e-161
1	Ralb	1.07625e-121	0.348478	0.525	0.201	4.26433e-117	5.78074e-160	0.305201	0.55	0.274	2.29045e-155	1.07625e-121	1.15615e-159
1	Cndp2	2.07626e-114	0.410848	0.639	0.308	8.22655e-110	3.75687e-155	0.304162	0.721	0.436	1.48855e-150	2.07626e-114	7.51373e-155
1	Colgalt1	1.51405e-79	0.33377	0.541	0.267	5.99898e-75	5.76827e-155	0.319952	0.633	0.356	2.28551e-150	1.51405e-79	1.15365e-154
1	Acox3	8.82393e-105	0.408518	0.58	0.274	3.49622e-100	9.14916e-155	0.307779	0.531	0.269	3.62508e-150	8.82393e-105	1.82983e-154
1	Wsb1	3.84912e-139	0.536499	0.787	0.45	1.5251e-134	1.01703e-150	0.324434	0.782	0.498	4.02969e-146	3.84912e-139	2.03407e-150
1	Igbp1	4.70181e-149	0.530351	0.872	0.599	1.86295e-144	1.74021e-140	0.318054	0.772	0.529	6.89505e-136	1.74021e-140	9.40363e-149
1	Rp2	7.83597e-135	0.416952	0.662	0.296	3.10477e-130	1.07302e-148	0.303346	0.563	0.294	4.25151e-144	7.83597e-135	2.14604e-148
1	Crlf3	4.46765e-137	0.465707	0.74	0.356	1.77017e-132	2.92052e-148	0.306915	0.687	0.397	1.15717e-143	4.46765e-137	5.84104e-148
1	Dram2	3.16175e-105	0.431438	0.736	0.446	1.25275e-100	2.52685e-143	0.305233	0.592	0.334	1.00119e-138	3.16175e-105	5.05369e-143
1	Mtdh	8.43743e-62	0.313905	0.943	0.862	3.34308e-57	1.34146e-142	0.327126	0.911	0.742	5.31513e-138	8.43743e-62	2.68292e-142
1	Os9	8.80236e-80	0.39048	0.836	0.652	3.48767e-75	3.37804e-138	0.33064	0.771	0.542	1.33845e-133	8.80236e-80	6.75608e-138
1	Hivep3	3.43467e-78	0.338578	0.386	0.155	1.36088e-73	1.95755e-137	0.324118	0.407	0.184	7.75621e-133	3.43467e-78	3.9151e-137
1	Hltf	1.38668e-65	0.351355	0.656	0.412	5.49431e-61	5.78269e-129	0.306398	0.533	0.292	2.29122e-124	1.38668e-65	1.15654e-128
1	Flcn	1.085e-50	0.316241	0.684	0.481	4.29898e-46	6.84948e-129	0.31642	0.632	0.382	2.7139e-124	1.085e-50	1.3699e-128
1	Ergic3	3.52007e-63	0.314062	0.781	0.587	1.39472e-58	1.51552e-122	0.303506	0.755	0.537	6.00479e-118	3.52007e-63	3.03104e-122
1	Cxcl10	3.59868e-74	1.14624	0.308	0.112	1.42587e-69	1.1692e-89	0.739068	0.419	0.24	4.63262e-85	3.59868e-74	2.33841e-89
1	Klf2	4.66695e-63	0.586635	0.36	0.155	1.84914e-58	2.18707e-53	0.394982	0.286	0.162	8.66559e-49	2.18707e-53	9.3339e-63
2	Mal	0	1.06569	1	0.655	0	0	2.06036	0.999	0.248	0	0	0
2	Ccp110	0	0.978442	0.969	0.531	0	0	1.47669	0.958	0.236	0	0	0
2	Tspan2	0	0.960996	0.999	0.645	0	0	1.8305	1	0.276	0	0	0
2	Qdpr	0	0.948385	1	0.757	0	0	1.70152	1	0.451	0	0	0
2	Plp1	0	0.882834	1	0.975	0	0	1.92109	1	0.707	0	0	0
2	Tnfaip6	0	0.8689	0.97	0.528	0	0	1.54701	0.967	0.215	0	0	0
2	Il33	0	0.847222	0.996	0.58	0	0	1.64329	0.986	0.198	0	0	0
2	Ptprd	0	0.837098	0.998	0.564	0	0	1.64487	0.998	0.248	0	0	0
2	Aplp1	0	0.821354	1	0.788	0	0	1.73457	1	0.408	0	0	0
2	Tmod2	0	0.820164	0.999	0.585	0	0	1.4404	0.995	0.263	0	0	0
2	Clmn	0	0.814581	0.917	0.456	0	0	1.32771	0.896	0.163	0	0	0
2	Syt11	0	0.813394	0.999	0.673	0	0	1.59594	1	0.403	0	0	0
2	Slc12a2	0	0.811784	1	0.726	0	0	1.50248	1	0.474	0	0	0
2	Gpr37	0	0.801125	0.995	0.541	0	0	1.52973	0.998	0.202	0	0	0
2	Septin4	0	0.782902	1	0.649	0	0	1.69722	1	0.263	0	0	0
2	Mapt	0	0.781862	0.999	0.617	0	0	1.48946	1	0.301	0	0	0
2	Prr18	0	0.780625	0.934	0.462	0	0	1.29682	0.927	0.181	0	0	0
2	Gjc3	0	0.780618	0.996	0.55	0	0	1.12285	0.986	0.253	0	0	0
2	Ttll7	0	0.775614	0.996	0.536	0	0	1.41386	0.975	0.2	0	0	0
2	Gatm	0	0.764321	1	0.862	0	0	1.12381	1	0.785	0	0	0
2	Tmem229a	0	0.754781	0.951	0.48	0	0	1.08745	0.861	0.171	0	0	0
2	Gpm6b	0	0.751547	1	0.633	0	0	1.39397	0.998	0.321	0	0	0
2	Grb14	0	0.748673	0.976	0.528	0	0	1.37914	0.97	0.211	0	0	0
2	Efhd1	0	0.744218	0.914	0.444	0	0	1.1341	0.882	0.161	0	0	0
2	Gprc5b	0	0.742507	0.955	0.493	0	0	1.23405	0.942	0.192	0	0	0
2	Fa2h	0	0.737783	0.996	0.535	0	0	1.59274	0.998	0.235	0	0	0
2	Agap1	0	0.736825	0.969	0.547	0	0	1.16629	0.924	0.246	0	0	0
2	Tppp	0	0.731629	0.999	0.57	0	0	1.33516	0.999	0.279	0	0	0
2	Plekhh1	0	0.725394	0.986	0.532	0	0	1.34664	0.963	0.192	0	0	0
2	Tmeff1	0	0.717062	0.968	0.527	0	0	1.11958	0.914	0.221	0	0	0
2	Ywhaq	0	0.683288	0.998	0.844	0	0	1.30931	0.999	0.628	0	0	0
2	Qk	0	0.682242	1	0.928	0	0	1.13501	1	0.854	0	0	0
2	Grm3	0	0.682094	0.835	0.362	0	0	1.0186	0.78	0.132	0	0	0
2	Cnp	5.15027e-308	0.741887	1	0.744	2.04064e-303	0	1.60125	1	0.471	0	5.15027e-308	0
2	Kif21a	1.76908e-307	0.73181	0.945	0.495	7.00945e-303	0	1.18853	0.915	0.215	0	1.76908e-307	0
2	Kif1b	1.17355e-306	0.724618	1	0.746	4.64984e-302	0	1.45828	1	0.479	0	1.17355e-306	0
2	Opalin	4.8641e-304	0.695964	0.891	0.397	1.92725e-299	0	1.40212	0.946	0.171	0	4.8641e-304	0
2	Edil3	6.98756e-304	0.718822	0.996	0.545	2.76861e-299	0	1.28065	0.978	0.225	0	6.98756e-304	0
2	Ptn	4.38335e-303	0.710269	0.962	0.489	1.73677e-298	0	1.33133	0.99	0.23	0	4.38335e-303	0
2	Kndc1	3.46765e-302	0.734999	0.947	0.492	1.37395e-297	0	1.16785	0.875	0.175	0	3.46765e-302	0
2	Mog	1.81049e-301	0.723117	0.997	0.578	7.17351e-297	0	1.59893	0.998	0.225	0	1.81049e-301	0
2	Psat1	5.20768e-297	0.698145	0.995	0.649	2.06339e-292	0	1.37046	0.998	0.41	0	5.20768e-297	0
2	X5031439G07Rik	5.77932e-294	0.671147	0.975	0.662	2.28988e-289	0	1.10751	0.959	0.422	0	5.77932e-294	0
2	Phlpp1	1.24366e-292	0.666302	0.975	0.599	4.92764e-288	0	1.22754	0.959	0.282	0	1.24366e-292	0
2	Mobp	2.52376e-291	0.72986	0.997	0.604	9.99963e-287	0	1.5636	1	0.219	0	2.52376e-291	0
2	Plekhb1	4.52377e-291	0.705249	0.999	0.589	1.79241e-286	0	1.36296	0.998	0.259	0	4.52377e-291	0
2	App	2.52754e-290	0.665646	1	0.935	1.00146e-285	0	1.34945	1	0.822	0	2.52754e-290	0
2	Septin7	1.3362e-289	0.682727	0.999	0.881	5.29431e-285	0	1.25245	0.998	0.701	0	1.3362e-289	0
2	Arhgap23	1.90126e-289	0.682786	0.992	0.569	7.53317e-285	0	1.32153	0.99	0.264	0	1.90126e-289	0
2	Rcan2	5.24921e-289	0.674176	0.953	0.516	2.07984e-284	0	1.10453	0.924	0.208	0	5.24921e-289	0
2	Cdc37l1	2.50385e-288	0.664023	0.99	0.662	9.92074e-284	0	1.10974	0.968	0.387	0	2.50385e-288	0
2	Pls1	2.37894e-287	0.673426	0.902	0.445	9.42584e-283	0	1.17027	0.896	0.161	0	2.37894e-287	0
2	Mast4	1.21163e-286	0.67074	0.927	0.482	4.80073e-282	0	0.971532	0.822	0.173	0	1.21163e-286	0
2	Pcdh9	4.30736e-286	0.702224	0.989	0.51	1.70666e-281	0	1.27795	0.949	0.207	0	4.30736e-286	0
2	Cntn2	3.51239e-283	0.68073	0.996	0.582	1.39168e-278	0	1.53498	0.997	0.229	0	3.51239e-283	0
2	Gnai1	5.96061e-282	0.68855	0.956	0.502	2.36171e-277	0	1.24377	0.94	0.215	0	5.96061e-282	0
2	Scd2	6.3773e-282	0.753186	1	0.765	2.52681e-277	0	1.67206	1	0.464	0	6.3773e-282	0
2	Lpar1	2.52154e-281	0.688986	0.932	0.475	9.99084e-277	0	1.24892	0.904	0.179	0	2.52154e-281	0
2	Atp8a1	1.46792e-280	0.626234	0.996	0.814	5.81618e-276	0	0.957571	0.986	0.65	0	1.46792e-280	0
2	Aspa	1.17014e-279	0.693568	0.992	0.555	4.63632e-275	0	1.25932	0.961	0.198	0	1.17014e-279	0
2	Ugt8a	1.92358e-279	0.712513	0.997	0.551	7.62159e-275	0	1.51376	0.996	0.245	0	1.92358e-279	0
2	Cryab	1.27664e-277	0.715091	1	0.626	5.05829e-273	0	1.52523	0.999	0.287	0	1.27664e-277	0
2	Map7	3.32099e-277	0.666055	0.984	0.557	1.31584e-272	0	1.19924	0.952	0.244	0	3.32099e-277	0
2	Slc48a1	1.07728e-276	0.635368	0.987	0.665	4.26838e-272	0	1.29663	0.985	0.392	0	1.07728e-276	0
2	Ndrg1	1.17648e-276	0.684578	0.999	0.62	4.66145e-272	0	1.38176	0.997	0.264	0	1.17648e-276	0
2	Rnf13	1.55599e-272	0.600573	0.999	0.845	6.16513e-268	0	1.12002	0.998	0.659	0	1.55599e-272	0
2	Olig1	3.07288e-271	0.64125	0.924	0.481	1.21754e-266	0	0.990744	0.914	0.216	0	3.07288e-271	0
2	Trim2	1.87469e-268	0.660476	0.973	0.54	7.42791e-264	0	1.13942	0.94	0.275	0	1.87469e-268	0
2	Otud7b	7.65506e-268	0.633773	0.97	0.567	3.03309e-263	0	1.11854	0.936	0.282	0	7.65506e-268	0
2	Rtn4	5.60733e-267	0.630642	0.999	0.913	2.22174e-262	0	1.20906	1	0.783	0	5.60733e-267	0
2	Myo6	5.94295e-267	0.641316	0.954	0.534	2.35472e-262	0	1.08077	0.91	0.23	0	5.94295e-267	0
2	Efnb3	7.54084e-267	0.642033	0.979	0.513	2.98783e-262	0	1.61105	0.998	0.226	0	7.54084e-267	0
2	Ank3	1.48141e-266	0.651184	0.982	0.536	5.86964e-262	0	1.2268	0.968	0.251	0	1.48141e-266	0
2	Pex5l	2.53004e-266	0.73629	0.986	0.587	1.00245e-261	0	1.45222	0.95	0.215	0	2.53004e-266	0
2	Chn2	2.61057e-266	0.642362	0.929	0.508	1.03436e-261	0	0.883377	0.921	0.293	0	2.61057e-266	0
2	Dpysl2	6.58805e-264	0.605228	0.996	0.775	2.61032e-259	0	0.960434	0.992	0.669	0	6.58805e-264	0
2	S1pr5	4.12808e-263	0.645974	0.946	0.489	1.63563e-258	0	1.0817	0.854	0.159	0	4.12808e-263	0
2	Aatk	1.35266e-262	0.628299	0.975	0.557	5.35951e-258	0	1.01649	0.894	0.231	0	1.35266e-262	0
2	Slain1	4.71629e-262	0.628811	0.977	0.525	1.86869e-257	0	1.11193	0.926	0.214	0	4.71629e-262	0
2	Limch1	7.6298e-262	0.6341	0.966	0.501	3.02308e-257	0	1.19529	0.932	0.193	0	7.6298e-262	0
2	Tmem98	1.25954e-261	0.660692	0.926	0.49	4.99054e-257	0	1.00867	0.787	0.161	0	1.25954e-261	0
2	Pde8a	1.26643e-260	0.617609	0.868	0.445	5.01783e-256	0	0.887366	0.738	0.146	0	1.26643e-260	0
2	Elavl3	2.79198e-260	0.63785	0.977	0.545	1.10624e-255	0	1.21234	0.974	0.257	0	2.79198e-260	0
2	Ppp1r16b	9.29982e-260	0.648933	0.953	0.524	3.68478e-255	0	1.29401	0.971	0.252	0	9.29982e-260	0
2	Osbpl1a	7.15608e-259	0.63643	0.965	0.597	2.83538e-254	0	1.09786	0.95	0.315	0	7.15608e-259	0
2	Sema6d	1.3334e-258	0.696641	0.922	0.475	5.28318e-254	0	1.04087	0.826	0.185	0	1.3334e-258	0
2	Ptgds	3.66122e-258	0.940813	0.983	0.794	1.45065e-253	0	2.19516	0.99	0.353	0	3.66122e-258	0
2	Pllp	5.5094e-258	0.617679	0.941	0.497	2.18293e-253	0	1.33564	0.973	0.234	0	5.5094e-258	0
2	Cmtm5	1.55936e-257	0.609354	0.943	0.513	6.1785e-253	0	1.36987	0.979	0.224	0	1.55936e-257	0
2	Fgfr2	2.82556e-257	0.625444	0.958	0.504	1.11954e-252	0	1.20805	0.928	0.182	0	2.82556e-257	0
2	Trim59	1.13349e-256	0.67724	0.94	0.523	4.49112e-252	0	1.106	0.897	0.225	0	1.13349e-256	0
2	Cldn11	3.47827e-256	0.727641	1	0.877	1.37816e-251	0	1.78545	1	0.414	0	3.47827e-256	0
2	Cdc42bpa	5.73758e-255	0.646762	0.961	0.538	2.27334e-250	0	0.996124	0.869	0.23	0	5.73758e-255	0
2	Mbp	6.33244e-255	0.701448	1	0.785	2.50904e-250	0	1.56406	1	0.47	0	6.33244e-255	0
2	Myrf	8.13253e-255	0.658249	0.996	0.571	3.22227e-250	0	1.3456	0.999	0.246	0	8.13253e-255	0
2	Hepacam	9.15493e-255	0.607366	0.886	0.447	3.62737e-250	0	1.18284	0.934	0.19	0	9.15493e-255	0
2	Sox10	2.88245e-253	0.641534	0.987	0.552	1.14209e-248	0	1.00794	0.971	0.252	0	2.88245e-253	0
2	Tmem88b	2.88611e-253	0.684266	0.999	0.591	1.14354e-248	0	1.48594	1	0.244	0	2.88611e-253	0
2	Ptpn11	8.19082e-253	0.606442	0.968	0.682	3.24537e-248	0	0.841091	0.899	0.405	0	8.19082e-253	0
2	Kcna6	2.01738e-252	0.637715	0.886	0.457	7.99325e-248	0	1.01212	0.831	0.177	0	2.01738e-252	0
2	Serinc5	2.35941e-251	0.62115	0.945	0.51	9.34846e-247	0	1.13277	0.909	0.228	0	2.35941e-251	0
2	Nfasc	5.62327e-251	0.601884	0.994	0.576	2.22805e-246	0	1.01299	0.987	0.275	0	5.62327e-251	0
2	Unc5b	1.07684e-249	0.604535	0.876	0.447	4.26666e-245	0	0.973218	0.807	0.165	0	1.07684e-249	0
2	Dip2a	7.38841e-247	0.604293	0.967	0.565	2.92744e-242	0	1.18355	0.93	0.251	0	7.38841e-247	0
2	Ank2	1.5518e-244	0.609023	0.978	0.566	6.14853e-240	0	1.03527	0.936	0.276	0	1.5518e-244	0
2	Fez1	5.25202e-243	0.590428	0.952	0.526	2.08096e-238	0	1.42781	0.994	0.273	0	5.25202e-243	0
2	Epb41l3	2.21922e-242	0.610201	0.96	0.608	8.79298e-238	0	1.15684	0.946	0.299	0	2.21922e-242	0
2	Abca2	4.17859e-242	0.599857	0.975	0.594	1.65564e-237	0	1.21646	0.965	0.292	0	4.17859e-242	0
2	Ppp1r14a	8.92667e-241	0.595723	0.934	0.506	3.53692e-236	0	1.06439	0.846	0.168	0	8.92667e-241	0
2	Slc24a2	4.95589e-240	0.643303	0.99	0.551	1.96362e-235	0	1.31008	0.977	0.221	0	4.95589e-240	0
2	Clasp2	7.13362e-240	0.564581	0.984	0.739	2.82648e-235	0	0.977436	0.973	0.503	0	7.13362e-240	0
2	Stmn1	2.43792e-239	0.617179	1	0.674	9.65952e-235	0	1.2497	0.998	0.342	0	2.43792e-239	0
2	Ypel2	3.17172e-239	0.628747	0.901	0.496	1.2567e-234	0	1.07426	0.864	0.211	0	3.17172e-239	0
2	Tmcc3	3.17572e-238	0.584439	0.992	0.71	1.25828e-233	0	1.01092	0.982	0.507	0	3.17572e-238	0
2	Plcl1	2.1027e-236	0.593701	0.943	0.524	8.33133e-232	0	0.945537	0.83	0.217	0	2.1027e-236	0
2	Olig2	2.90643e-236	0.60628	0.909	0.464	1.15159e-231	0	0.739961	0.798	0.197	0	2.90643e-236	0
2	Rhou	4.05213e-234	0.593973	0.943	0.506	1.60553e-229	0	1.09603	0.911	0.2	0	4.05213e-234	0
2	Srcin1	1.8908e-233	0.594948	0.904	0.496	7.49172e-229	0	0.997517	0.88	0.213	0	1.8908e-233	0
2	Enpp2	8.28436e-233	0.660184	1	0.759	3.28243e-228	0	1.64416	1	0.346	0	8.28436e-233	0
2	Map1a	1.69994e-231	0.595516	0.971	0.528	6.73552e-227	0	1.07745	0.926	0.236	0	1.69994e-231	0
2	Gm19439	6.19696e-231	0.600246	0.944	0.516	2.45536e-226	0	0.985026	0.77	0.166	0	6.19696e-231	0
2	Sox8	1.96639e-230	0.583476	0.882	0.457	7.79121e-226	0	0.687139	0.72	0.191	0	1.96639e-230	0
2	Hhip	3.99037e-230	0.624493	0.874	0.427	1.58107e-225	0	1.17006	0.858	0.163	0	3.99037e-230	0
2	Add1	1.12098e-229	0.591535	0.967	0.719	4.44157e-225	0	1.01616	0.927	0.477	0	1.12098e-229	0
2	Sv2a	9.63074e-229	0.594988	0.98	0.556	3.81589e-224	0	1.22369	0.976	0.278	0	9.63074e-229	0
2	Stmn4	2.3587e-228	0.54996	0.89	0.473	9.34562e-224	0	0.947654	0.81	0.168	0	2.3587e-228	0
2	Mag	2.27231e-227	0.676317	1	0.756	9.00333e-223	0	1.5839	1	0.362	0	2.27231e-227	0
2	Cers2	4.31226e-227	0.542522	0.984	0.765	1.7086e-222	0	1.17157	0.998	0.656	0	4.31226e-227	0
2	Ppp2r3a	2.67368e-226	0.592402	0.911	0.497	1.05937e-221	0	1.015	0.879	0.225	0	2.67368e-226	0
2	Usp54	1.13128e-225	0.566267	0.895	0.48	4.48237e-221	0	0.940319	0.802	0.176	0	1.13128e-225	0
2	Lrrn1	3.02254e-224	0.591543	0.962	0.506	1.19759e-219	0	1.13521	0.938	0.221	0	3.02254e-224	0
2	Carhsp1	3.15036e-224	0.575069	0.956	0.549	1.24823e-219	0	1.06076	0.916	0.256	0	3.15036e-224	0
2	Hsp90aa1	5.6947e-224	0.51544	1	0.921	2.25635e-219	0	0.677498	0.995	0.831	0	5.6947e-224	0
2	Ddr1	3.37848e-223	0.569633	0.939	0.51	1.33862e-218	0	1.08469	0.902	0.22	0	3.37848e-223	0
2	Cpox	2.94098e-221	0.554623	0.986	0.68	1.16528e-216	0	1.16453	0.981	0.401	0	2.94098e-221	0
2	Map6d1	1.67025e-220	0.566905	0.908	0.484	6.61785e-216	0	1.00213	0.838	0.191	0	1.67025e-220	0
2	Tmeff2	2.30548e-219	0.576312	0.913	0.484	9.13479e-215	0	1.04418	0.88	0.197	0	2.30548e-219	0
2	Gab1	1.37559e-218	0.563385	0.923	0.522	5.45036e-214	0	0.893894	0.825	0.228	0	1.37559e-218	0
2	Gstp-ps	1.39796e-218	0.585235	0.889	0.492	5.539e-214	0	0.919795	0.81	0.2	0	1.39796e-218	0
2	Sox2ot	1.32234e-217	0.58261	0.883	0.469	5.23937e-213	0	1.04856	0.854	0.2	0	1.32234e-217	0
2	Shroom2	1.32236e-217	0.535829	0.8	0.393	5.23945e-213	0	0.873538	0.745	0.157	0	1.32236e-217	0
2	Rtn3	1.83977e-217	0.44974	0.995	0.905	7.28955e-213	0	0.786252	0.993	0.771	0	1.83977e-217	0
2	Clip3	3.32743e-217	0.561904	0.96	0.538	1.31839e-212	0	1.0691	0.929	0.238	0	3.32743e-217	0
2	Bcas1	3.52635e-217	0.536386	0.894	0.487	1.39721e-212	0	0.389793	0.782	0.226	0	3.52635e-217	0
2	Wscd1	1.66348e-213	0.542282	0.857	0.452	6.59105e-209	0	0.990005	0.871	0.212	0	1.66348e-213	0
2	Arpc1a	1.86154e-213	0.529832	0.982	0.775	7.37581e-209	0	0.869223	0.958	0.553	0	1.86154e-213	0
2	Adamts4	2.4814e-213	0.549413	0.846	0.425	9.83182e-209	0	0.824681	0.726	0.162	0	2.4814e-213	0
2	Arhgef10	4.15812e-213	0.534749	0.912	0.499	1.64753e-208	0	1.01977	0.889	0.209	0	4.15812e-213	0
2	Il1rap	4.69653e-213	0.549902	0.927	0.509	1.86086e-208	0	0.933043	0.837	0.223	0	4.69653e-213	0
2	Ermn	7.3292e-213	0.653147	1	0.629	2.90398e-208	0	1.57824	0.999	0.224	0	7.3292e-213	0
2	Slc44a1	7.34242e-212	0.589967	0.998	0.688	2.90921e-207	0	1.22323	0.998	0.351	0	7.34242e-212	0
2	Ttyh2	1.78808e-211	0.557625	0.903	0.528	7.08475e-207	0	1.19006	0.944	0.231	0	1.78808e-211	0
2	Sec14l5	2.69717e-211	0.541818	0.925	0.492	1.06867e-206	0	0.992256	0.836	0.171	0	2.69717e-211	0
2	Kif1a	5.71681e-211	0.538705	0.936	0.526	2.26512e-206	0	1.03892	0.941	0.257	0	5.71681e-211	0
2	Mtmr2	2.0224e-210	0.558924	0.876	0.528	8.01315e-206	0	0.891881	0.814	0.288	0	2.0224e-210	0
2	Gnao1	1.85388e-209	0.599152	0.998	0.628	7.34545e-205	0	1.12545	0.99	0.302	0	1.85388e-209	0
2	Cpm	3.84644e-209	0.538225	0.848	0.437	1.52404e-204	0	0.913463	0.738	0.165	0	3.84644e-209	0
2	Car2	8.54444e-209	0.672201	1	0.857	3.38548e-204	0	1.56147	1	0.375	0	8.54444e-209	0
2	Klf13	1.08168e-208	0.524447	0.98	0.715	4.28581e-204	0	0.825833	0.947	0.516	0	1.08168e-208	0
2	Sema6a	5.74616e-208	0.582587	0.799	0.394	2.27674e-203	0	0.920713	0.78	0.182	0	5.74616e-208	0
2	Nrbp2	1.32701e-207	0.551649	0.958	0.565	5.2579e-203	0	1.41842	0.987	0.246	0	1.32701e-207	0
2	Arsg	4.13318e-207	0.544945	0.876	0.486	1.63765e-202	0	1.02836	0.853	0.195	0	4.13318e-207	0
2	Dixdc1	4.29872e-207	0.551995	0.813	0.413	1.70324e-202	0	0.90877	0.745	0.161	0	4.29872e-207	0
2	ENSMUSG00000120976	2.27169e-206	0.593708	0.981	0.545	9.00089e-202	0	1.16392	0.928	0.213	0	2.27169e-206	0
2	Rnf7	4.91466e-206	0.529929	0.983	0.751	1.94729e-201	0	1.03236	0.966	0.508	0	4.91466e-206	0
2	Ckb	2.6328e-205	0.536951	0.871	0.509	1.04317e-200	0	0.83421	0.895	0.417	0	2.6328e-205	0
2	Ado	6.38842e-205	0.539327	0.907	0.548	2.53122e-200	0	0.822404	0.802	0.254	0	6.38842e-205	0
2	Degs1	8.02374e-204	0.502611	0.971	0.73	3.17917e-199	0	1.01499	0.977	0.47	0	8.02374e-204	0
2	Pip4k2a	4.27617e-203	0.492023	0.995	0.839	1.6943e-198	0	0.784878	0.979	0.66	0	4.27617e-203	0
2	Abca8a	1.67974e-202	0.622279	0.461	0.143	6.65546e-198	0	1.17005	0.668	0.074	0	1.67974e-202	0
2	Gjc2	1.84747e-202	0.525356	0.88	0.463	7.32005e-198	0	1.00565	0.805	0.158	0	1.84747e-202	0
2	Kcna1	1.48963e-201	0.572381	0.974	0.514	5.90222e-197	0	1.10021	0.903	0.203	0	1.48963e-201	0
2	Glul	2.76627e-201	0.601213	1	0.947	1.09605e-196	0	1.24738	0.998	0.823	0	2.76627e-201	0
2	Omg	5.97239e-200	0.560617	0.893	0.478	2.36638e-195	0	1.09278	0.921	0.225	0	5.97239e-200	0
2	Smco3	1.27034e-198	0.512986	0.774	0.37	5.03334e-194	0	0.763671	0.623	0.115	0	1.27034e-198	0
2	Klhl2	5.46589e-198	0.521839	0.971	0.596	2.1657e-193	0	0.956207	0.881	0.275	0	5.46589e-198	0
2	Rdx	1.72647e-196	0.498461	0.98	0.797	6.84061e-192	0	0.904659	0.968	0.576	0	1.72647e-196	0
2	Erbin	1.54534e-195	0.513304	0.989	0.826	6.12295e-191	0	0.92693	0.973	0.584	0	1.54534e-195	0
2	Tspan15	1.15616e-194	0.520249	0.871	0.477	4.58092e-190	0	0.978514	0.82	0.178	0	1.15616e-194	0
2	Rcbtb1	7.31184e-194	0.508004	0.911	0.566	2.8971e-189	0	0.840346	0.817	0.273	0	7.31184e-194	0
2	Mbnl2	2.59371e-193	0.505398	0.996	0.774	1.02768e-188	0	0.926166	0.986	0.548	0	2.59371e-193	0
2	Phyhipl	1.06591e-192	0.532561	0.926	0.51	4.22334e-188	0	0.910722	0.914	0.243	0	1.06591e-192	0
2	Sort1	3.89793e-192	0.511817	0.923	0.604	1.54444e-187	0	0.95237	0.893	0.367	0	3.89793e-192	0
2	Foxn3	5.9964e-192	0.518272	0.977	0.7	2.37589e-187	0	0.876915	0.938	0.483	0	5.9964e-192	0
2	Dbi	8.16093e-192	0.506763	0.996	0.768	3.23352e-187	0	1.06015	0.993	0.558	0	8.16093e-192	0
2	Arap2	5.0938e-191	0.531556	0.982	0.573	2.01826e-186	0	0.990163	0.897	0.232	0	5.0938e-191	0
2	Kcnj10	1.27117e-189	0.541032	0.986	0.592	5.03664e-185	0	1.08243	0.944	0.287	0	1.27117e-189	0
2	B3galt5	1.35143e-189	0.542726	0.932	0.524	5.35463e-185	0	0.947745	0.806	0.227	0	1.35143e-189	0
2	Pdlim2	3.64489e-189	0.525758	0.854	0.486	1.44418e-184	0	1.14556	0.869	0.24	0	3.64489e-189	0
2	Elovl7	6.29748e-189	0.494326	0.893	0.469	2.49519e-184	0	0.951113	0.819	0.177	0	6.29748e-189	0
2	Sez6l2	1.42769e-188	0.552475	0.912	0.527	5.65679e-184	0	1.40909	0.951	0.218	0	1.42769e-188	0
2	Kctd13	4.38932e-188	0.519666	0.91	0.547	1.73914e-183	0	1.05899	0.955	0.341	0	4.38932e-188	0
2	Adipor2	9.18302e-188	0.50576	0.988	0.743	3.6385e-183	0	0.989272	0.938	0.492	0	9.18302e-188	0
2	Nkain2	3.53338e-187	0.485754	0.82	0.42	1.4e-182	0	0.792997	0.648	0.136	0	3.53338e-187	0
2	Bnip3l	5.50375e-187	0.491223	0.962	0.736	2.1807e-182	0	0.780664	0.895	0.466	0	5.50375e-187	0
2	Eps15	1.0973e-186	0.481215	0.974	0.797	4.34771e-182	0	0.81781	0.952	0.54	0	1.0973e-186	0
2	Nipa1	2.25197e-186	0.503255	0.862	0.473	8.92274e-182	0	0.97311	0.83	0.189	0	2.25197e-186	0
2	Pacs2	3.94373e-186	0.506644	0.971	0.635	1.56258e-181	0	0.929185	0.929	0.37	0	3.94373e-186	0
2	Cntfr	5.88631e-186	0.545582	0.653	0.295	2.33228e-181	0	0.667782	0.534	0.122	0	5.88631e-186	0
2	Tm7sf3	1.15183e-185	0.506691	0.929	0.577	4.56376e-181	0	0.873416	0.874	0.32	0	1.15183e-185	0
2	Desi1	1.84257e-185	0.500537	0.803	0.442	7.30062e-181	0	1.13606	0.917	0.242	0	1.84257e-185	0
2	Cldnd1	5.03599e-185	0.467133	0.98	0.776	1.99536e-180	0	0.718281	0.958	0.624	0	5.03599e-185	0
2	Tulp4	3.75582e-184	0.531529	0.986	0.681	1.48813e-179	0	1.04081	0.953	0.395	0	3.75582e-184	0
2	Secisbp2l	1.10319e-183	0.488562	0.985	0.752	4.37106e-179	0	0.974286	0.967	0.509	0	1.10319e-183	0
2	Tubb4a	2.0896e-183	0.580674	0.999	0.703	8.2794e-179	0	1.70017	1	0.414	0	2.0896e-183	0
2	Amer2	2.19029e-183	0.549089	0.763	0.381	8.67835e-179	0	0.719877	0.587	0.149	0	2.19029e-183	0
2	Cerox1	4.92658e-183	0.48888	0.785	0.408	1.95201e-178	0	0.902806	0.797	0.186	0	4.92658e-183	0
2	X1700047M11Rik	7.27728e-183	0.502779	0.704	0.341	2.8834e-178	0	0.760278	0.625	0.131	0	7.27728e-183	0
2	Npc1	7.40198e-183	0.456232	0.984	0.795	2.93281e-178	0	0.840501	0.968	0.588	0	7.40198e-183	0
2	Ppp2r2c	3.81748e-181	0.473767	0.914	0.514	1.51256e-176	0	0.820264	0.836	0.206	0	3.81748e-181	0
2	Cfl2	7.70444e-181	0.492134	0.942	0.622	3.05265e-176	0	0.872546	0.893	0.342	0	7.70444e-181	0
2	Arnt2	8.262e-180	0.485595	0.807	0.422	3.27357e-175	0	0.819791	0.709	0.172	0	8.262e-180	0
2	Golga7	8.85314e-179	0.439132	0.992	0.836	3.50779e-174	0	0.854287	0.97	0.615	0	8.85314e-179	0
2	Vldlr	3.6946e-178	0.501259	0.839	0.443	1.46387e-173	0	0.83646	0.747	0.185	0	3.6946e-178	0
2	Rnf141	4.91536e-178	0.505362	0.907	0.6	1.94756e-173	0	0.793571	0.811	0.301	0	4.91536e-178	0
2	Slc6a9	1.6302e-177	0.492286	0.842	0.459	6.45918e-173	0	0.957269	0.833	0.197	0	1.6302e-177	0
2	Add3	3.66565e-177	0.483379	0.963	0.656	1.4524e-172	0	0.984601	0.956	0.396	0	3.66565e-177	0
2	Glrb	6.5781e-177	0.461029	0.753	0.386	2.60637e-172	0	0.750241	0.696	0.162	0	6.5781e-177	0
2	Fam171b	7.12045e-176	0.489447	0.947	0.52	2.82127e-171	0	0.974009	0.892	0.231	0	7.12045e-176	0
2	Stxbp6	1.48699e-175	0.513321	0.786	0.409	5.89176e-171	0	0.617812	0.581	0.137	0	1.48699e-175	0
2	Epn2	1.78858e-175	0.482547	0.804	0.434	7.08671e-171	0	0.77731	0.776	0.2	0	1.78858e-175	0
2	Thra	3.20962e-175	0.469319	0.914	0.526	1.27172e-170	0	0.761046	0.891	0.271	0	3.20962e-175	0
2	Reep3	1.07425e-173	0.428654	0.992	0.865	4.25639e-169	0	0.736985	0.981	0.732	0	1.07425e-173	0
2	Plaat3	1.95949e-173	0.467179	0.989	0.757	7.76391e-169	0	0.872363	0.94	0.457	0	1.95949e-173	0
2	Ncam1	3.61248e-173	0.486279	0.918	0.515	1.43134e-168	0	0.858655	0.907	0.255	0	3.61248e-173	0
2	Kcnq3	4.16966e-172	0.536887	0.704	0.344	1.6521e-167	0	0.65895	0.565	0.135	0	4.16966e-172	0
2	Cystm1	7.24643e-172	0.480936	0.896	0.525	2.87118e-167	0	0.906609	0.861	0.222	0	7.24643e-172	0
2	Prkacb	5.86091e-168	0.44453	0.988	0.789	2.32221e-163	0	0.780342	0.95	0.548	0	5.86091e-168	0
2	Daam1	8.34903e-167	0.494279	0.931	0.652	3.30805e-162	0	0.9628	0.928	0.42	0	8.34903e-167	0
2	Kazn	9.36112e-167	0.481162	0.794	0.426	3.70906e-162	0	0.909093	0.807	0.187	0	9.36112e-167	0
2	Bace1	1.76173e-166	0.455627	0.737	0.386	6.98031e-162	0	0.764552	0.676	0.162	0	1.76173e-166	0
2	Car14	2.31884e-166	0.516207	0.692	0.344	9.18771e-162	0	0.877687	0.669	0.118	0	2.31884e-166	0
2	Ephb1	2.38629e-166	0.474464	0.74	0.374	9.45495e-162	0	0.979966	0.785	0.159	0	2.38629e-166	0
2	Tsc22d4	2.89882e-166	0.473185	0.942	0.673	1.14857e-161	0	0.863031	0.927	0.453	0	2.89882e-166	0
2	Micall1	2.10333e-164	0.488616	0.84	0.504	8.33381e-160	0	0.82805	0.771	0.219	0	2.10333e-164	0
2	Aplp2	2.7999e-163	0.415775	0.975	0.813	1.10938e-158	0	0.903723	0.977	0.557	0	2.7999e-163	0
2	Mt1	3.23845e-163	0.56074	0.981	0.836	1.28314e-158	0	1.10614	0.951	0.569	0	3.23845e-163	0
2	Cadm4	9.12341e-163	0.448872	0.861	0.473	3.61488e-158	0	0.99093	0.924	0.233	0	9.12341e-163	0
2	Zfp536	1.1891e-162	0.459865	0.804	0.425	4.71145e-158	0	0.753754	0.648	0.137	0	1.1891e-162	0
2	Jph4	2.29386e-162	0.531507	0.611	0.274	9.08872e-158	0	0.955915	0.735	0.156	0	2.29386e-162	0
2	Enpp5	3.19605e-162	0.450827	0.888	0.534	1.26634e-157	0	0.785052	0.801	0.244	0	3.19605e-162	0
2	Pak1	5.6917e-162	0.46551	0.91	0.599	2.25517e-157	0	0.969904	0.948	0.43	0	5.6917e-162	0
2	Tprn	2.32847e-161	0.441417	0.799	0.435	9.22586e-157	0	0.890552	0.797	0.189	0	2.32847e-161	0
2	Tmbim1	1.31936e-160	0.458219	0.893	0.59	5.22757e-156	0	0.815981	0.828	0.309	0	1.31936e-160	0
2	Ank	1.99311e-160	0.445496	0.95	0.589	7.89708e-156	0	0.808163	0.851	0.313	0	1.99311e-160	0
2	D7Ertd443e	7.16869e-160	0.465473	0.695	0.347	2.84038e-155	0	0.681587	0.562	0.103	0	7.16869e-160	0
2	Pou3f3	2.36253e-159	0.470169	0.803	0.433	9.36083e-155	0	0.73861	0.702	0.177	0	2.36253e-159	0
2	Dnaaf9	2.63687e-159	0.464061	0.798	0.463	1.04478e-154	0	0.8971	0.852	0.251	0	2.63687e-159	0
2	Nfix	4.15704e-158	0.430817	0.952	0.665	1.6471e-153	0	0.689813	0.895	0.407	0	4.15704e-158	0
2	Lrrc8b	9.18296e-158	0.453199	0.9	0.522	3.63847e-153	0	0.86439	0.827	0.234	0	9.18296e-158	0
2	Cep97	1.59758e-157	0.475682	0.655	0.331	6.32993e-153	0	0.685096	0.605	0.149	0	1.59758e-157	0
2	Gabbr1	2.16351e-157	0.459892	0.901	0.548	8.57227e-153	0	0.901533	0.883	0.294	0	2.16351e-157	0
2	Abhd17b	4.28706e-157	0.474876	0.869	0.574	1.69862e-152	0	0.764825	0.838	0.352	0	4.28706e-157	0
2	Fnbp1	4.80021e-157	0.434296	0.972	0.785	1.90194e-152	0	1.02275	0.994	0.619	0	4.80021e-157	0
2	Frmd5	2.86246e-156	0.455161	0.768	0.406	1.13416e-151	0	0.671719	0.603	0.135	0	2.86246e-156	0
2	Nedd4	3.82257e-156	0.428887	0.949	0.556	1.51458e-151	0	0.685885	0.9	0.285	0	3.82257e-156	0
2	Pals1	4.04996e-156	0.47684	0.893	0.581	1.60467e-151	0	0.712368	0.745	0.261	0	4.04996e-156	0
2	Pik3c2b	7.23328e-156	0.455257	0.683	0.349	2.86597e-151	0	0.703782	0.628	0.152	0	7.23328e-156	0
2	Ak3	9.69817e-156	0.468771	0.958	0.619	3.84261e-151	0	0.979843	0.904	0.317	0	9.69817e-156	0
2	Anln	1.91133e-155	0.380122	0.912	0.503	7.57305e-151	0	0.874802	0.804	0.162	0	1.91133e-155	0
2	Gsn	2.77592e-155	0.487929	0.861	0.517	1.09988e-150	0	1.20342	0.911	0.267	0	2.77592e-155	0
2	Atrn	6.79529e-155	0.446561	0.77	0.44	2.69243e-150	0	0.72844	0.734	0.23	0	6.79529e-155	0
2	Spock1	1.14519e-154	0.605885	0.655	0.325	4.53747e-150	0	1.15699	0.735	0.163	0	1.14519e-154	0
2	Agpat4	2.93042e-154	0.447744	0.802	0.47	1.16109e-149	0	1.01888	0.883	0.236	0	2.93042e-154	0
2	Septin8	3.14505e-152	0.459601	0.97	0.631	1.24613e-147	0	1.01031	0.957	0.358	0	3.14505e-152	0
2	Igsf11	3.87968e-152	0.446939	0.811	0.44	1.53721e-147	0	0.742381	0.705	0.169	0	3.87968e-152	0
2	Ube2d1	1.45413e-151	0.432965	0.916	0.647	5.76155e-147	0	0.76038	0.846	0.388	0	1.45413e-151	0
2	Lgi3	1.93628e-151	0.432531	0.698	0.358	7.67193e-147	0	0.852702	0.735	0.15	0	1.93628e-151	0
2	Sec11c	4.8522e-151	0.45916	0.996	0.85	1.92254e-146	0	0.952236	0.981	0.628	0	4.8522e-151	0
2	Jam3	9.18583e-151	0.431491	0.9	0.501	3.63961e-146	0	0.907421	0.84	0.207	0	9.18583e-151	0
2	Zfp365	1.16786e-150	0.44337	0.917	0.508	4.62728e-146	0	0.741927	0.781	0.213	0	1.16786e-150	0
2	Dpy19l1	2.18946e-149	0.433359	0.958	0.71	8.67508e-145	0	0.93099	0.944	0.479	0	2.18946e-149	0
2	Atp1b3	3.22374e-149	0.41895	0.994	0.927	1.27731e-144	0	0.848766	0.993	0.829	0	3.22374e-149	0
2	Sh3gl3	4.07893e-149	0.45013	0.692	0.362	1.61615e-144	0	0.880272	0.722	0.157	0	4.07893e-149	0
2	Neo1	1.0034e-148	0.424881	0.76	0.411	3.97567e-144	0	0.770046	0.747	0.199	0	1.0034e-148	0
2	Rab31	1.2698e-148	0.430385	0.927	0.62	5.0312e-144	0	0.724164	0.847	0.367	0	1.2698e-148	0
2	Kif13a	3.28497e-148	0.443887	0.742	0.418	1.30157e-143	0	0.698786	0.666	0.192	0	3.28497e-148	0
2	Fam13c	4.26769e-148	0.512757	0.608	0.295	1.69094e-143	0	0.754901	0.522	0.099	0	4.26769e-148	0
2	Anks1b	2.33034e-147	0.426045	0.893	0.486	9.23327e-143	0	0.968727	0.881	0.223	0	2.33034e-147	0
2	Dlg1	2.68863e-147	0.440264	0.911	0.652	1.06529e-142	0	0.816416	0.899	0.419	0	2.68863e-147	0
2	Lrrc4b	3.18758e-145	0.444573	0.695	0.37	1.26298e-140	0	0.620118	0.623	0.168	0	3.18758e-145	0
2	Ermp1	3.24771e-145	0.428793	0.798	0.476	1.28681e-140	0	0.766249	0.721	0.218	0	3.24771e-145	0
2	Fkbp1a	3.51078e-145	0.415324	0.995	0.83	1.39104e-140	0	0.908146	0.99	0.615	0	3.51078e-145	0
2	Prox1	3.79359e-145	0.442163	0.912	0.512	1.50309e-140	0	0.866705	0.805	0.224	0	3.79359e-145	0
2	Fads6	1.93418e-144	0.419433	0.688	0.355	7.66361e-140	0	0.703905	0.591	0.123	0	1.93418e-144	0
2	Tmem125	6.69431e-144	0.442014	0.758	0.411	2.65242e-139	0	0.867262	0.706	0.135	0	6.69431e-144	0
2	Csrp1	5.73315e-143	0.437302	0.789	0.459	2.27159e-138	0	0.77208	0.738	0.178	0	5.73315e-143	0
2	Gm38642	3.2377e-142	0.398302	0.677	0.346	1.28284e-137	0	0.584027	0.506	0.088	0	3.2377e-142	0
2	Tex2	3.7693e-142	0.439982	0.745	0.451	1.49347e-137	0	0.67144	0.685	0.233	0	3.7693e-142	0
2	Larp6	4.19581e-142	0.40374	0.656	0.334	1.66247e-137	0	0.687636	0.614	0.128	0	4.19581e-142	0
2	Ano4	9.39459e-142	0.425889	0.594	0.285	3.72233e-137	0	0.661535	0.554	0.098	0	9.39459e-142	0
2	Plekha1	1.36993e-141	0.461167	0.925	0.682	5.42793e-137	0	0.993807	0.93	0.453	0	1.36993e-141	0
2	Reep5	1.43027e-141	0.401899	0.967	0.801	5.66703e-137	0	0.736029	0.944	0.612	0	1.43027e-141	0
2	Etv1	2.1342e-140	0.452213	0.926	0.566	8.45613e-136	0	0.94841	0.826	0.248	0	2.1342e-140	0
2	Prickle1	4.64612e-140	0.448631	0.478	0.195	1.84088e-135	0	0.790918	0.571	0.103	0	4.64612e-140	0
2	Rtkn	8.90651e-139	0.423996	0.693	0.377	3.52894e-134	0	0.807898	0.706	0.155	0	8.90651e-139	0
2	Polr3e	1.02778e-138	0.464027	0.706	0.395	4.07226e-134	0	0.649972	0.558	0.147	0	1.02778e-138	0
2	Insc	6.05002e-137	0.39662	0.791	0.433	2.39714e-132	0	0.83176	0.716	0.15	0	6.05002e-137	0
2	Scd1	4.37301e-136	0.435028	0.74	0.404	1.73267e-131	0	0.72267	0.599	0.128	0	4.37301e-136	0
2	Phactr1	1.15176e-133	0.404696	0.814	0.464	4.56351e-129	0	0.746647	0.736	0.221	0	1.15176e-133	0
2	C030029H02Rik	2.07814e-133	0.341862	0.37	0.127	8.23401e-129	0	0.505877	0.375	0.049	0	2.07814e-133	0
2	X1500004A13Rik	1.50723e-132	0.438384	0.76	0.437	5.97194e-128	0	0.731704	0.672	0.177	0	1.50723e-132	0
2	Slc6a8	2.00096e-131	0.420436	0.707	0.397	7.9282e-127	0	0.624924	0.573	0.144	0	2.00096e-131	0
2	Endod1	3.54573e-131	0.441533	0.999	0.671	1.40489e-126	0	1.09403	0.986	0.38	0	3.54573e-131	0
2	Shisa4	3.89141e-131	0.40702	0.726	0.398	1.54185e-126	0	0.766926	0.716	0.177	0	3.89141e-131	0
2	Myo1d	3.73045e-130	0.393528	0.633	0.33	1.47808e-125	0	0.691527	0.597	0.111	0	3.73045e-130	0
2	Sypl	8.106e-130	0.318077	0.986	0.804	3.21176e-125	0	0.733229	0.944	0.548	0	8.106e-130	0
2	Rtl8b	1.0584e-128	0.417963	0.855	0.551	4.1936e-124	0	0.727804	0.771	0.286	0	1.0584e-128	0
2	Gpr62	2.85004e-128	0.402365	0.669	0.354	1.12924e-123	0	0.689921	0.581	0.112	0	2.85004e-128	0
2	Tjp2	1.0883e-127	0.398068	0.831	0.521	4.31205e-123	0	0.810134	0.77	0.246	0	1.0883e-127	0
2	Wipi1	1.80049e-125	0.410969	0.747	0.433	7.1339e-121	0	0.718682	0.666	0.171	0	1.80049e-125	0
2	Sik3	1.94886e-125	0.388655	0.883	0.565	7.72176e-121	0	0.77115	0.8	0.277	0	1.94886e-125	0
2	Fermt2	3.75329e-125	0.377346	0.755	0.425	1.48713e-120	0	0.878342	0.822	0.206	0	3.75329e-125	0
2	Tppp3	3.76849e-125	0.370276	0.831	0.467	1.49315e-120	0	0.738964	0.67	0.166	0	3.76849e-125	0
2	Sccpdh	1.65561e-124	0.373545	0.851	0.51	6.55985e-120	0	0.883967	0.836	0.237	0	1.65561e-124	0
2	Fhl1	4.16499e-123	0.375934	0.618	0.323	1.65025e-118	0	0.637321	0.574	0.126	0	4.16499e-123	0
2	St18	1.08158e-122	0.403772	0.701	0.388	4.28545e-118	0	0.711304	0.627	0.143	0	1.08158e-122	0
2	Dnajc6	1.99689e-121	0.379801	0.599	0.307	7.9121e-117	0	0.582087	0.504	0.104	0	1.99689e-121	0
2	Exoc6b	2.62426e-121	0.400632	0.718	0.43	1.03978e-116	0	0.686456	0.672	0.194	0	2.62426e-121	0
2	Plpp3	9.4588e-121	0.415079	0.673	0.373	3.74777e-116	0	0.620421	0.638	0.176	0	9.4588e-121	0
2	Sirt2	2.29509e-120	0.359226	0.861	0.601	9.09359e-116	0	0.598736	0.974	0.597	0	2.29509e-120	0
2	Erbb3	2.80917e-119	0.403761	0.559	0.274	1.11305e-114	0	0.719196	0.583	0.118	0	2.80917e-119	0
2	Ptk2	1.97738e-117	0.386777	0.739	0.429	7.83476e-113	0	0.666435	0.652	0.176	0	1.97738e-117	0
2	Tom1l2	3.0819e-117	0.366166	0.697	0.407	1.22111e-112	0	0.65664	0.644	0.194	0	3.0819e-117	0
2	Fam168a	3.89768e-115	0.37504	0.919	0.645	1.54434e-110	0	0.819187	0.944	0.479	0	3.89768e-115	0
2	Dusp26	1.70703e-113	0.367388	0.605	0.32	6.76359e-109	0	0.768889	0.7	0.165	0	1.70703e-113	0
2	Tuba1a	5.37537e-112	0.389475	0.998	0.787	2.12983e-107	0	0.921882	0.999	0.524	0	5.37537e-112	0
2	Tmod1	3.53602e-111	0.362718	0.546	0.273	1.40104e-106	0	0.776428	0.612	0.109	0	3.53602e-111	0
2	Prnp	4.79523e-111	0.425478	0.998	0.667	1.89997e-106	0	1.13297	0.995	0.323	0	4.79523e-111	0
2	Enpp4	6.10455e-111	0.366552	0.993	0.751	2.41875e-106	0	0.850761	0.965	0.462	0	6.10455e-111	0
2	Trf	1.12396e-109	0.4112	1	0.885	4.45334e-105	0	1.32666	0.999	0.73	0	1.12396e-109	0
2	Tmcc2	4.1733e-109	0.3626	0.594	0.326	1.65354e-104	0	0.729092	0.685	0.168	0	4.1733e-109	0
2	Tmem178b	7.15499e-108	0.364108	0.672	0.377	2.83495e-103	0	0.607348	0.544	0.126	0	7.15499e-108	0
2	Tyro3	9.99697e-108	0.325584	0.461	0.213	3.961e-103	0	0.870546	0.698	0.134	0	9.99697e-108	0
2	Plekhg3	2.54853e-107	0.355085	0.56	0.295	1.00978e-102	0	0.519932	0.448	0.094	0	2.54853e-107	0
2	Tmem151a	1.52166e-105	0.346074	0.601	0.323	6.02912e-101	0	0.664557	0.564	0.11	0	1.52166e-105	0
2	Adamtsl1	2.42397e-105	0.371211	0.585	0.31	9.60424e-101	0	0.605728	0.532	0.107	0	2.42397e-105	0
2	Nmral1	8.33673e-104	0.349271	0.637	0.362	3.30318e-99	0	0.712541	0.66	0.194	0	8.33673e-104	0
2	Slc20a2	1.46037e-103	0.344252	0.664	0.379	5.78629e-99	0	0.672254	0.582	0.137	0	1.46037e-103	0
2	Tmem63a	4.59966e-103	0.344845	0.703	0.433	1.82248e-98	0	0.734453	0.792	0.32	0	4.59966e-103	0
2	Mcam	2.01755e-102	0.325806	0.481	0.219	7.99393e-98	0	0.682097	0.532	0.098	0	2.01755e-102	0
2	Acot7	2.3635e-100	0.337155	0.746	0.45	9.36465e-96	0	0.721072	0.749	0.23	0	2.3635e-100	0
2	St6galnac3	2.42144e-99	0.335822	0.652	0.36	9.59421e-95	0	0.546348	0.493	0.1	0	2.42144e-99	0
2	Gstm7	8.78485e-97	0.328798	0.594	0.326	3.48073e-92	0	0.899581	0.764	0.163	0	8.78485e-97	0
2	Tlcd3a	2.57648e-95	0.314659	0.499	0.253	1.02085e-90	0	0.696697	0.587	0.115	0	2.57648e-95	0
2	Cdr2l	8.16922e-94	0.327197	0.482	0.243	3.23681e-89	0	0.560349	0.454	0.089	0	8.16922e-94	0
2	Prrg1	8.68653e-93	0.335872	0.515	0.265	3.44178e-88	0	0.661922	0.52	0.1	0	8.68653e-93	0
2	Gpd1	1.31866e-92	0.380772	0.475	0.24	5.2248e-88	0	0.684795	0.463	0.085	0	1.31866e-92	0
2	Ablim2	6.76731e-92	0.316899	0.483	0.242	2.68134e-87	0	0.632613	0.542	0.11	0	6.76731e-92	0
2	Gjb1	9.29065e-92	0.300758	0.654	0.364	3.68114e-87	0	0.693876	0.611	0.126	0	9.29065e-92	0
2	Carns1	1.87366e-91	0.331062	0.543	0.281	7.4238e-87	0	0.669285	0.545	0.117	0	1.87366e-91	0
2	Map7d1	5.65462e-91	0.328203	0.686	0.438	2.24047e-86	0	0.942814	0.922	0.445	0	5.65462e-91	0
2	Llgl1	9.58695e-89	0.338867	0.654	0.409	3.79854e-84	0	0.801884	0.842	0.308	0	9.58695e-89	0
2	S100a16	1.01114e-88	0.30846	0.647	0.374	4.00635e-84	0	0.685317	0.836	0.229	0	1.01114e-88	0
2	Mapk8ip1	1.35143e-88	0.309253	0.529	0.287	5.35462e-84	0	0.494766	0.431	0.087	0	1.35143e-88	0
2	Gamt	4.33862e-86	0.324073	0.463	0.238	1.71905e-81	0	0.847403	0.684	0.149	0	4.33862e-86	0
2	Spock3	2.73112e-83	0.327142	0.608	0.335	1.08212e-78	0	0.732846	0.551	0.111	0	2.73112e-83	0
2	Sytl2	8.30194e-74	0.309565	0.567	0.328	3.28939e-69	0	0.63821	0.571	0.129	0	8.30194e-74	0
2	Elovl6	1.40168e-72	0.336124	0.508	0.287	5.55372e-68	0	0.664691	0.546	0.127	0	1.40168e-72	0
2	Gm48678	1.12536e-65	0.546372	0.192	0.063	4.45892e-61	0	0.910731	0.354	0.037	0	1.12536e-65	0
2	Ptpdc1	2.65039e-82	0.306711	0.49	0.262	1.05014e-77	2.10515e-307	0.580867	0.509	0.124	8.34101e-303	2.65039e-82	4.21029e-307
2	Papss1	6.60726e-148	0.430778	0.903	0.628	2.61793e-143	2.33399e-307	0.70345	0.877	0.417	9.24775e-303	6.60726e-148	4.66799e-307
2	D16Ertd472e	2.20649e-165	0.512084	0.868	0.533	8.74255e-161	6.59251e-307	0.7044	0.826	0.339	2.61208e-302	2.20649e-165	1.3185e-306
2	Adssl1	2.54421e-89	0.320145	0.63	0.382	1.00807e-84	4.83985e-305	0.595278	0.571	0.157	1.91765e-300	2.54421e-89	9.67971e-305
2	Adi1	1.31848e-165	0.484335	0.892	0.621	5.22408e-161	1.94916e-304	0.732156	0.854	0.408	7.72297e-300	1.31848e-165	3.89833e-304
2	Gna12	3.04626e-169	0.463249	0.919	0.672	1.20699e-164	5.81626e-304	0.749508	0.86	0.446	2.30452e-299	3.04626e-169	1.16325e-303
2	Klf9	1.05651e-124	0.408125	0.894	0.539	4.18611e-120	3.60142e-303	0.667396	0.742	0.243	1.42695e-298	1.05651e-124	7.20284e-303
2	Stox2	1.12382e-130	0.407885	0.698	0.372	4.4528e-126	5.53034e-303	0.600611	0.586	0.16	2.19123e-298	1.12382e-130	1.10607e-302
2	Sulf2	8.37273e-140	0.421771	0.924	0.578	3.31744e-135	1.70357e-302	0.616674	0.842	0.329	6.74989e-298	8.37273e-140	3.40714e-302
2	Eml2	1.06256e-114	0.386275	0.661	0.38	4.21008e-110	9.52397e-301	0.603024	0.575	0.161	3.77359e-296	1.06256e-114	1.90479e-300
2	Ncam2	1.41124e-128	0.406598	0.772	0.42	5.59163e-124	1.65998e-300	0.607655	0.599	0.164	6.57718e-296	1.41124e-128	3.31996e-300
2	Kcna2	4.20422e-152	0.523207	0.56	0.242	1.6658e-147	1.10277e-299	0.644712	0.462	0.101	4.36941e-295	4.20422e-152	2.20555e-299
2	Arrdc3	5.89522e-200	0.563278	0.95	0.618	2.3358e-195	3.80823e-299	0.763402	0.834	0.367	1.5089e-294	5.89522e-200	7.61645e-299
2	Slc6a1	5.8987e-181	0.489103	0.712	0.35	2.33718e-176	2.76263e-298	0.553347	0.526	0.132	1.09461e-293	5.8987e-181	5.52525e-298
2	Prr5l	6.60228e-138	0.422128	0.919	0.615	2.61596e-133	3.51689e-297	0.720357	0.805	0.337	1.39346e-292	6.60228e-138	7.03378e-297
2	Clic4	1.3747e-144	0.387532	0.999	0.777	5.44682e-140	3.7143e-297	0.685912	0.99	0.647	1.47168e-292	1.3747e-144	7.4286e-297
2	Phldb1	1.60247e-104	0.344976	0.556	0.294	6.3493e-100	5.14353e-297	0.540548	0.495	0.12	2.03797e-292	1.60247e-104	1.02871e-296
2	Pak5	4.56286e-84	0.345993	0.508	0.271	1.8079e-79	1.97833e-296	0.533242	0.446	0.096	7.83852e-292	4.56286e-84	3.95665e-296
2	Prickle2	4.35494e-128	0.394686	0.649	0.334	1.72551e-123	5.06537e-296	0.522015	0.464	0.104	2.007e-291	4.35494e-128	1.01307e-295
2	Zbtb16	2.55427e-79	0.302086	0.464	0.245	1.01205e-74	7.06954e-294	0.504569	0.456	0.1	2.80109e-289	2.55427e-79	1.41391e-293
2	Ss18l2	1.70656e-147	0.476873	0.812	0.488	6.76171e-143	1.68245e-293	0.693499	0.678	0.232	6.66619e-289	1.70656e-147	3.36489e-293
2	Cavin3	4.09899e-90	0.326377	0.528	0.28	1.6241e-85	7.35626e-293	0.500857	0.44	0.094	2.9147e-288	4.09899e-90	1.47125e-292
2	Kat2b	8.62669e-127	0.394986	0.938	0.646	3.41807e-122	1.05374e-291	0.713003	0.844	0.388	4.17514e-287	8.62669e-127	2.10749e-291
2	Spg20	3.90492e-121	0.376517	0.767	0.467	1.54721e-116	7.94079e-290	0.620593	0.648	0.213	3.1463e-285	3.90492e-121	1.58816e-289
2	Amotl2	8.29689e-120	0.397205	0.611	0.321	3.28739e-115	2.16776e-289	0.59764	0.545	0.145	8.58909e-285	8.29689e-120	4.33552e-289
2	Fbxl5	8.36909e-125	0.429804	0.814	0.544	3.316e-120	2.7682e-287	0.672887	0.734	0.288	1.09682e-282	8.36909e-125	5.5364e-287
2	Dact3	5.10587e-91	0.323047	0.536	0.291	2.02305e-86	8.42184e-287	0.557058	0.531	0.142	3.3369e-282	5.10587e-91	1.68437e-286
2	Bche	3.05119e-133	0.4378	0.565	0.271	1.20894e-128	1.60789e-286	0.492353	0.415	0.086	6.37076e-282	3.05119e-133	3.21577e-286
2	Synm	9.06819e-98	0.345993	0.69	0.392	3.593e-93	8.25059e-286	0.545028	0.484	0.114	3.26905e-281	9.06819e-98	1.65012e-285
2	Ddc	8.09191e-124	0.477157	0.61	0.312	3.20618e-119	2.40828e-284	0.634828	0.492	0.119	9.5421e-280	8.09191e-124	4.81657e-284
2	Txndc16	2.30914e-90	0.322347	0.831	0.574	9.14929e-86	1.11745e-282	0.672442	0.777	0.326	4.42756e-278	2.30914e-90	2.2349e-282
2	Cpeb1	1.14642e-99	0.362749	0.639	0.366	4.54235e-95	3.12182e-280	0.567075	0.496	0.125	1.23693e-275	1.14642e-99	6.24364e-280
2	Efcab14	9.73726e-98	0.307516	0.955	0.734	3.8581e-93	3.34987e-276	0.690129	0.884	0.447	1.32729e-271	9.73726e-98	6.69974e-276
2	Lmbrd1	1.8358e-96	0.340974	0.905	0.708	7.2738e-92	5.60238e-276	0.704579	0.881	0.484	2.21978e-271	1.8358e-96	1.12048e-275
2	Clcn3	1.2467e-121	0.398249	0.876	0.601	4.93967e-117	2.18505e-275	0.678637	0.801	0.353	8.6576e-271	1.2467e-121	4.3701e-275
2	Oxr1	1.87518e-123	0.423121	0.885	0.649	7.42986e-119	3.08268e-275	0.744067	0.778	0.348	1.22142e-270	1.87518e-123	6.16537e-275
2	Rtl8a	6.16072e-113	0.369428	0.887	0.611	2.441e-108	4.34751e-275	0.649698	0.824	0.355	1.72257e-270	6.16072e-113	8.69502e-275
2	Taldo1	9.83025e-141	0.421566	0.924	0.708	3.89494e-136	6.37826e-275	0.690571	0.919	0.556	2.52719e-270	9.83025e-141	1.27565e-274
2	Snx30	4.76683e-121	0.416621	0.789	0.525	1.88871e-116	1.68639e-274	0.68312	0.755	0.316	6.6818e-270	4.76683e-121	3.37277e-274
2	Entpd5	6.19039e-89	0.31863	0.615	0.36	2.45276e-84	8.22433e-274	0.569039	0.574	0.17	3.25865e-269	6.19039e-89	1.64487e-273
2	Megf10	7.70754e-140	0.41848	0.705	0.37	3.05388e-135	1.03295e-273	0.501418	0.434	0.097	4.09275e-269	7.70754e-140	2.0659e-273
2	Map4k5	6.85247e-140	0.449401	0.873	0.571	2.71508e-135	1.20324e-272	0.640101	0.722	0.273	4.76748e-268	6.85247e-140	2.40648e-272
2	Frmd8	8.7814e-105	0.366581	0.883	0.612	3.47937e-100	8.02498e-270	0.673715	0.787	0.335	3.17966e-265	8.7814e-105	1.605e-269
2	Map7d2	9.06293e-121	0.43435	0.724	0.403	3.59092e-116	1.33962e-268	0.592754	0.534	0.147	5.30786e-264	9.06293e-121	2.67925e-268
2	Cadm2	4.13262e-112	0.400568	0.663	0.359	1.63743e-107	6.39114e-268	0.447651	0.595	0.168	2.5323e-263	4.13262e-112	1.27823e-267
2	Ndst1	6.37566e-96	0.36612	0.864	0.607	2.52616e-91	1.73402e-267	0.661224	0.762	0.302	6.87055e-263	6.37566e-96	3.46805e-267
2	Slc16a1	5.33799e-111	0.356621	0.659	0.379	2.11502e-106	2.48533e-266	0.575005	0.61	0.196	9.84736e-262	5.33799e-111	4.97065e-266
2	Wbp2	3.11459e-114	0.353411	0.937	0.756	1.23406e-109	5.8612e-266	0.665894	0.946	0.636	2.32232e-261	3.11459e-114	1.17224e-265
2	Inpp5f	3.22868e-116	0.383754	0.809	0.512	1.27927e-111	3.3747e-264	0.59255	0.673	0.233	1.33712e-259	3.22868e-116	6.74939e-264
2	Mid1ip1	1.36254e-71	0.306339	0.719	0.494	5.39864e-67	3.48454e-262	0.782858	0.831	0.415	1.38065e-257	1.36254e-71	6.96909e-262
2	Cdkl5	2.18388e-80	0.331285	0.568	0.332	8.65296e-76	1.48797e-260	0.531862	0.478	0.122	5.89564e-256	2.18388e-80	2.97594e-260
2	Dtna	8.01874e-83	0.33247	0.589	0.342	3.17719e-78	2.04754e-260	0.53566	0.516	0.14	8.11278e-256	8.01874e-83	4.09509e-260
2	Mat2a	3.92196e-255	0.607286	0.99	0.83	1.55396e-250	3.6499e-260	0.700126	0.944	0.657	1.44616e-255	3.92196e-255	7.2998e-260
2	Dennd11	1.3888e-105	0.355897	0.565	0.298	5.50269e-101	8.51887e-260	0.515255	0.479	0.124	3.37535e-255	1.3888e-105	1.70377e-259
2	Erbb4	4.16517e-109	0.364776	0.459	0.203	1.65032e-104	1.11961e-259	0.514754	0.413	0.092	4.43612e-255	4.16517e-109	2.23922e-259
2	Fktn	1.04615e-114	0.418612	0.712	0.431	4.14504e-110	2.34852e-259	0.586511	0.622	0.206	9.30532e-255	1.04615e-114	4.69705e-259
2	Sorbs3	1.75879e-85	0.326763	0.551	0.318	6.96868e-81	5.78945e-259	0.506075	0.472	0.121	2.2939e-254	1.75879e-85	1.15789e-258
2	Pakap	8.06266e-124	0.398134	0.727	0.41	3.19459e-119	3.57098e-258	0.494042	0.512	0.137	1.41489e-253	8.06266e-124	7.14195e-258
2	Hid1	1.09159e-95	0.337163	0.527	0.281	4.32509e-91	9.15415e-258	0.460369	0.405	0.09	3.62706e-253	1.09159e-95	1.83083e-257
2	Serpinb1a	3.59467e-89	0.385538	0.51	0.256	1.42428e-84	1.14655e-257	0.576009	0.435	0.099	4.54286e-253	3.59467e-89	2.2931e-257
2	Tspyl4	9.80579e-109	0.337092	0.766	0.445	3.88525e-104	1.69812e-256	0.54698	0.649	0.212	6.72828e-252	9.80579e-109	3.39623e-256
2	Pigz	5.36277e-90	0.312255	0.478	0.243	2.12484e-85	4.37757e-255	0.453326	0.401	0.089	1.73448e-250	5.36277e-90	8.75514e-255
2	Dock1	1.7856e-107	0.371314	0.736	0.455	7.07489e-103	8.92674e-253	0.592118	0.593	0.194	3.53695e-248	1.7856e-107	1.78535e-252
2	Gpr155	3.15618e-112	0.393265	0.792	0.514	1.25054e-107	7.37177e-251	0.640971	0.746	0.32	2.92084e-246	3.15618e-112	1.47435e-250
2	Mfsd6	2.59638e-102	0.343506	0.773	0.48	1.02874e-97	2.14675e-249	0.543876	0.623	0.207	8.50585e-245	2.59638e-102	4.2935e-249
2	Snx15	2.59725e-113	0.382997	0.72	0.446	1.02908e-108	2.17017e-249	0.61753	0.638	0.235	8.59863e-245	2.59725e-113	4.34033e-249
2	Slc38a2	2.09031e-210	0.620245	0.967	0.761	8.28223e-206	2.61166e-249	0.748233	0.936	0.631	1.03479e-244	2.09031e-210	5.22332e-249
2	Strn	2.03085e-131	0.44311	0.825	0.528	8.04663e-127	1.22075e-248	0.624742	0.711	0.284	4.83684e-244	2.03085e-131	2.44149e-248
2	Ddit4	4.6615e-80	0.304516	0.458	0.236	1.84698e-75	4.26372e-248	0.623713	0.447	0.113	1.68937e-243	4.6615e-80	8.52744e-248
2	Phactr3	3.77583e-152	0.461666	0.618	0.294	1.49606e-147	4.3766e-248	0.492558	0.451	0.115	1.7341e-243	3.77583e-152	8.7532e-248
2	Josd2	4.21377e-81	0.30537	0.587	0.354	1.66958e-76	3.78677e-247	0.507259	0.493	0.138	1.50039e-242	4.21377e-81	7.57354e-247
2	Tafa5	6.34262e-115	0.357113	0.676	0.37	2.51307e-110	2.32821e-243	0.505338	0.499	0.138	9.22481e-239	6.34262e-115	4.65641e-243
2	Zdhhc9	6.17657e-69	0.305989	0.57	0.364	2.44728e-64	3.00902e-242	0.583714	0.579	0.199	1.19223e-237	6.17657e-69	6.01804e-242
2	Cdip1	5.95287e-112	0.383834	0.716	0.451	2.35865e-107	3.94742e-242	0.590499	0.648	0.247	1.56405e-237	5.95287e-112	7.89485e-242
2	Zdhhc17	1.30083e-87	0.333832	0.731	0.486	5.15414e-83	2.04948e-241	0.609185	0.66	0.253	8.12044e-237	1.30083e-87	4.09895e-241
2	Serinc1	5.07442e-135	0.355525	0.984	0.877	2.01059e-130	3.49295e-241	0.605903	0.954	0.688	1.38398e-236	5.07442e-135	6.9859e-241
2	X2310022B05Rik	2.58472e-94	0.339874	0.637	0.373	1.02412e-89	1.51824e-239	0.526815	0.516	0.154	6.01558e-235	2.58472e-94	3.03649e-239
2	Tmem30a	2.94966e-112	0.340697	0.972	0.864	1.16871e-107	2.77902e-238	0.616954	0.947	0.685	1.1011e-233	2.94966e-112	5.55804e-238
2	ENSMUSG00000120806	2.16597e-102	0.327458	0.604	0.326	8.58202e-98	1.40938e-237	0.471871	0.49	0.134	5.58423e-233	2.16597e-102	2.81875e-237
2	Ktn1	1.65025e-107	0.325515	0.941	0.702	6.53861e-103	5.8254e-237	0.606228	0.856	0.428	2.30814e-232	1.65025e-107	1.16508e-236
2	Mettl7a1	2.67941e-114	0.37664	0.848	0.556	1.06163e-109	1.43295e-236	0.635837	0.726	0.307	5.67764e-232	2.67941e-114	2.8659e-236
2	Scrn1	1.182e-88	0.330763	0.604	0.35	4.68332e-84	2.37424e-235	0.521995	0.509	0.148	9.40721e-231	1.182e-88	4.74848e-235
2	Kif13b	1.56094e-82	0.317071	0.804	0.573	6.18475e-78	5.37082e-233	0.613687	0.718	0.304	2.12803e-228	1.56094e-82	1.07416e-232
2	Rhob	5.70829e-158	0.398355	0.999	0.888	2.26174e-153	3.14603e-232	0.528257	0.998	0.805	1.24652e-227	5.70829e-158	6.29205e-232
2	Kifbp	3.20245e-101	0.326424	0.787	0.525	1.26887e-96	8.55472e-231	0.515702	0.749	0.326	3.38955e-226	3.20245e-101	1.71094e-230
2	Sgk2	6.90779e-112	0.322868	0.368	0.141	2.737e-107	3.05782e-229	0.371378	0.288	0.05	1.21157e-224	6.90779e-112	6.11564e-229
2	Dscaml1	4.91809e-96	0.347897	0.623	0.364	1.94865e-91	6.45209e-227	0.488341	0.509	0.151	2.55645e-222	4.91809e-96	1.29042e-226
2	Nfe2l3	2.96035e-95	0.345484	0.551	0.297	1.17295e-90	4.22285e-226	0.411548	0.356	0.077	1.67318e-221	2.96035e-95	8.4457e-226
2	Nudt4	6.15866e-87	0.369078	0.695	0.477	2.44018e-82	5.79661e-226	0.634527	0.714	0.322	2.29673e-221	6.15866e-87	1.15932e-225
2	Pithd1	3.50594e-86	0.329117	0.695	0.451	1.38912e-81	1.23924e-225	0.559391	0.601	0.219	4.91012e-221	3.50594e-86	2.47848e-225
2	Marchf8	1.01919e-123	0.384881	0.838	0.547	4.03823e-119	8.03401e-225	0.549333	0.677	0.275	3.18323e-220	1.01919e-123	1.6068e-224
2	Cipc	2.74667e-80	0.339659	0.715	0.488	1.08829e-75	3.71795e-224	0.571577	0.652	0.251	1.47313e-219	2.74667e-80	7.4359e-224
2	Zfp706	2.22007e-132	0.383107	0.973	0.804	8.79635e-128	7.41124e-224	0.618739	0.912	0.604	2.93648e-219	2.22007e-132	1.48225e-223
2	Psip1	1.70545e-80	0.309545	0.854	0.615	6.75733e-76	4.94138e-222	0.549087	0.779	0.34	1.95787e-217	1.70545e-80	9.88276e-222
2	Dync1li2	6.98278e-99	0.363848	0.828	0.587	2.76672e-94	1.51516e-221	0.612101	0.742	0.34	6.00337e-217	6.98278e-99	3.03032e-221
2	Garre1	6.02298e-102	0.335909	0.789	0.516	2.38643e-97	1.26677e-220	0.600774	0.718	0.325	5.01919e-216	6.02298e-102	2.53354e-220
2	Hecw2	3.02304e-93	0.33217	0.471	0.23	1.19779e-88	3.93986e-220	0.401169	0.316	0.063	1.56105e-215	3.02304e-93	7.87971e-220
2	ENSMUSG00000120732	6.06325e-182	0.512706	0.911	0.594	2.40238e-177	9.85377e-220	0.62517	0.787	0.391	3.90426e-215	6.06325e-182	1.97075e-219
2	Ankrd28	4.41032e-118	0.379298	0.762	0.447	1.74746e-113	1.28769e-219	0.487796	0.54	0.172	5.10209e-215	4.41032e-118	2.57538e-219
2	Atp11a	2.32073e-76	0.30144	0.68	0.44	9.19518e-72	6.53984e-219	0.508872	0.556	0.188	2.59121e-214	2.32073e-76	1.30797e-218
2	Ppp2r2a	7.68971e-123	0.378986	0.941	0.713	3.04682e-118	2.38283e-218	0.610431	0.89	0.516	9.44123e-214	7.68971e-123	4.76565e-218
2	Mgat3	6.66655e-88	0.308383	0.49	0.257	2.64142e-83	1.92307e-217	0.416629	0.381	0.091	7.6196e-213	6.66655e-88	3.84615e-217
2	Unc5c	8.37267e-120	0.41351	0.587	0.299	3.31742e-115	5.63636e-217	0.472792	0.428	0.113	2.23324e-212	8.37267e-120	1.12727e-216
2	Pafah1b1	6.17635e-165	0.396643	0.994	0.891	2.44719e-160	1.21619e-215	0.544204	0.969	0.767	4.81878e-211	6.17635e-165	2.43238e-215
2	Sec62	1.47381e-109	0.319051	0.983	0.896	5.83952e-105	2.42326e-215	0.559297	0.969	0.775	9.60142e-211	1.47381e-109	4.84651e-215
2	Zcchc24	5.6196e-110	0.36117	0.794	0.488	2.2266e-105	5.46483e-215	0.537816	0.669	0.263	2.16528e-210	5.6196e-110	1.09297e-214
2	Slc22a17	4.68479e-139	0.418581	0.83	0.517	1.85621e-134	6.21002e-215	0.489246	0.73	0.302	2.46053e-210	4.68479e-139	1.242e-214
2	Kctd3	2.59642e-72	0.30239	0.696	0.444	1.02875e-67	9.21512e-215	0.529496	0.555	0.184	3.65122e-210	2.59642e-72	1.84302e-214
2	Hs3st1	3.28903e-83	0.32345	0.594	0.345	1.30318e-78	1.54274e-214	0.467694	0.422	0.11	6.11266e-210	3.28903e-83	3.08549e-214
2	Bin1	1.27957e-146	0.440322	0.916	0.671	5.06991e-142	2.56986e-214	0.61175	0.853	0.467	1.01823e-209	1.27957e-146	5.13972e-214
2	Cdk19	1.51102e-139	0.432566	0.905	0.636	5.98698e-135	3.97571e-214	0.63892	0.809	0.434	1.57525e-209	1.51102e-139	7.95141e-214
2	Zdhhc20	8.24486e-91	0.323313	0.869	0.653	3.26678e-86	7.82121e-212	0.622001	0.814	0.438	3.09892e-207	8.24486e-91	1.56424e-211
2	Rab6a	2.63781e-102	0.339002	0.972	0.811	1.04515e-97	1.88148e-206	0.556877	0.947	0.65	7.4548e-202	2.63781e-102	3.76296e-206
2	Lpgat1	7.27282e-133	0.428336	0.928	0.726	2.88164e-128	8.3679e-204	0.63127	0.819	0.468	3.31553e-199	7.27282e-133	1.67358e-203
2	Rhobtb3	9.25662e-87	0.310829	0.512	0.273	3.66766e-82	4.1289e-203	0.461902	0.426	0.118	1.63595e-198	9.25662e-87	8.2578e-203
2	Sgk1	4.85711e-183	0.556052	0.996	0.815	1.92448e-178	2.41611e-202	0.632531	0.975	0.672	9.57312e-198	4.85711e-183	4.83223e-202
2	Dennd5a	4.42227e-96	0.324715	0.915	0.743	1.75219e-91	1.41943e-201	0.583427	0.875	0.549	5.62407e-197	4.42227e-96	2.83886e-201
2	X4933431E20Rik	5.74443e-97	0.342931	0.576	0.316	2.27606e-92	5.91826e-201	0.416661	0.382	0.099	2.34493e-196	5.74443e-97	1.18365e-200
2	Plin4	9.63197e-88	0.340896	0.47	0.237	3.81638e-83	1.26776e-198	0.321257	0.232	0.036	5.02311e-194	9.63197e-88	2.53552e-198
2	Nfia	6.67541e-111	0.412401	0.814	0.531	2.64493e-106	1.21713e-197	0.520594	0.711	0.309	4.82252e-193	6.67541e-111	2.43426e-197
2	Dennd5b	9.89902e-105	0.392775	0.606	0.335	3.92219e-100	7.99286e-195	0.43735	0.454	0.136	3.16693e-190	9.89902e-105	1.59857e-194
2	H2bc4	9.35643e-91	0.320223	0.922	0.687	3.70721e-86	1.08587e-194	0.541459	0.774	0.369	4.30243e-190	9.35643e-91	2.17174e-194
2	Rffl	1.99699e-111	0.366422	0.845	0.577	7.91246e-107	1.58014e-193	0.575132	0.691	0.323	6.26082e-189	1.99699e-111	3.16027e-193
2	Fryl	5.77122e-74	0.300592	0.741	0.529	2.28667e-69	3.15685e-192	0.561677	0.713	0.337	1.25081e-187	5.77122e-74	6.31371e-192
2	Gabarapl2	2.38094e-95	0.315769	0.952	0.784	9.43377e-91	4.7759e-189	0.544385	0.909	0.639	1.89231e-184	2.38094e-95	9.55179e-189
2	Fam102a	5.19388e-95	0.330941	0.69	0.417	2.05792e-90	2.20058e-188	0.457866	0.586	0.22	8.71912e-184	5.19388e-95	4.40115e-188
2	Trim35	2.92629e-81	0.313146	0.854	0.658	1.15946e-76	4.68671e-188	0.54121	0.799	0.42	1.85697e-183	2.92629e-81	9.37342e-188
2	Bfsp2	2.60991e-116	0.365809	0.518	0.24	1.0341e-111	2.46822e-187	0.412822	0.379	0.099	9.77958e-183	2.60991e-116	4.93644e-187
2	Ifi27	6.66351e-105	0.376374	0.86	0.634	2.64022e-100	5.82453e-183	0.579747	0.678	0.31	2.3078e-178	6.66351e-105	1.16491e-182
2	Lap3	2.22786e-88	0.309082	0.946	0.746	8.82723e-84	8.69655e-182	0.567813	0.899	0.569	3.44575e-177	2.22786e-88	1.73931e-181
2	Plekhg1	1.7688e-83	0.306187	0.555	0.308	7.00832e-79	9.13392e-181	0.409184	0.38	0.104	3.61904e-176	1.7688e-83	1.82678e-180
2	Hacd1	3.51791e-83	0.308655	0.522	0.29	1.39386e-78	8.02845e-180	0.439437	0.408	0.122	3.18103e-175	3.51791e-83	1.60569e-179
2	Lrp1b	3.40701e-82	0.31047	0.484	0.251	1.34992e-77	4.83887e-179	0.404026	0.348	0.09	1.91726e-174	3.40701e-82	9.67774e-179
2	Tob1	1.77978e-101	0.382819	0.731	0.473	7.05186e-97	8.41755e-179	0.593586	0.665	0.302	3.3352e-174	1.77978e-101	1.68351e-178
2	Rassf2	1.10881e-132	0.39253	0.963	0.791	4.39334e-128	1.45011e-178	0.546461	0.9	0.593	5.74563e-174	1.10881e-132	2.90022e-178
2	Ralgps1	8.5574e-72	0.304404	0.594	0.367	3.39061e-67	7.73286e-178	0.443438	0.49	0.169	3.06392e-173	8.5574e-72	1.54657e-177
2	Bpnt2	4.76668e-99	0.351234	0.91	0.682	1.88866e-94	6.75265e-177	0.515181	0.8	0.42	2.67554e-172	4.76668e-99	1.35053e-176
2	X9330159F19Rik	1.03752e-129	0.434497	0.616	0.316	4.11087e-125	2.27606e-174	0.399808	0.386	0.109	9.01819e-170	1.03752e-129	4.55211e-174
2	Cbx6	4.8936e-88	0.329286	0.659	0.407	1.93894e-83	4.63314e-173	0.447198	0.539	0.2	1.83574e-168	4.8936e-88	9.26629e-173
2	Adora1	8.93819e-92	0.328338	0.618	0.35	3.54149e-87	1.34727e-169	0.451663	0.529	0.199	5.33815e-165	8.93819e-92	2.69454e-169
2	Fbxo7	1.02879e-79	0.333484	0.692	0.465	4.07629e-75	1.37879e-168	0.495891	0.65	0.291	5.46306e-164	1.02879e-79	2.75759e-168
2	Insig1	2.01451e-72	0.34265	0.585	0.375	7.98188e-68	1.99893e-166	0.554517	0.581	0.245	7.92015e-162	2.01451e-72	3.99785e-166
2	Dstn	5.76233e-93	0.310204	0.946	0.776	2.28315e-88	2.20504e-164	0.503062	0.895	0.597	8.73679e-160	5.76233e-93	4.41007e-164
2	Plpbp	2.10984e-108	0.382005	0.733	0.466	8.35961e-104	5.83077e-164	0.507722	0.629	0.293	2.31027e-159	2.10984e-108	1.16615e-163
2	Tmem132b	1.44207e-112	0.377098	0.576	0.283	5.71377e-108	1.43523e-163	0.392574	0.463	0.149	5.68666e-159	1.44207e-112	2.87045e-163
2	Tmem106b	2.45581e-91	0.328434	0.889	0.708	9.73042e-87	4.42475e-163	0.525145	0.782	0.447	1.75318e-158	2.45581e-91	8.84951e-163
2	Ppfibp2	3.66155e-80	0.330911	0.64	0.41	1.45078e-75	4.74982e-162	0.453286	0.478	0.172	1.88198e-157	3.66155e-80	9.49965e-162
2	Nbea	2.53402e-88	0.308082	0.555	0.305	1.00403e-83	2.2009e-161	0.397721	0.434	0.143	8.72041e-157	2.53402e-88	4.4018e-161
2	Ston2	1.17155e-74	0.317472	0.56	0.331	4.64191e-70	9.54105e-161	0.362515	0.371	0.106	3.78036e-156	1.17155e-74	1.90821e-160
2	Arl4d	2.94464e-115	0.415298	0.592	0.298	1.16673e-110	6.7188e-160	0.424683	0.306	0.077	2.66212e-155	2.94464e-115	1.34376e-159
2	C4b	3.21103e-111	0.379918	0.955	0.665	1.27227e-106	1.0769e-159	0.580411	0.883	0.5	4.2669e-155	3.21103e-111	2.1538e-159
2	Ptp4a1	4.11574e-159	0.422198	0.984	0.833	1.63074e-154	9.53369e-126	0.391687	0.936	0.726	3.77744e-121	9.53369e-126	8.23148e-159
2	Scarb2	7.61483e-104	0.309693	0.992	0.886	3.01715e-99	1.17174e-156	0.465983	0.969	0.762	4.64267e-152	7.61483e-104	2.34348e-156
2	Trim13	6.19891e-91	0.306496	0.478	0.245	2.45613e-86	1.28351e-156	0.342409	0.311	0.081	5.08552e-152	6.19891e-91	2.56702e-156
2	Dock10	5.16499e-102	0.352912	0.909	0.706	2.04647e-97	1.34658e-154	0.517836	0.849	0.541	5.33541e-150	5.16499e-102	2.69316e-154
2	Rnf144a	1.87181e-106	0.381717	0.647	0.359	7.41648e-102	2.1413e-152	0.377514	0.43	0.141	8.48425e-148	1.87181e-106	4.28259e-152
2	Smad7	2.51536e-148	0.449676	0.907	0.632	9.96635e-144	4.02519e-125	0.456285	0.817	0.511	1.59486e-120	4.02519e-125	5.03072e-148
2	Epb41l1	1.26738e-82	0.316966	0.658	0.404	5.02161e-78	4.236e-148	0.424086	0.497	0.189	1.67839e-143	1.26738e-82	8.47199e-148
2	Dstyk	2.19127e-84	0.308866	0.609	0.375	8.68223e-80	9.87766e-147	0.425951	0.512	0.205	3.91373e-142	2.19127e-84	1.97553e-146
2	Dusp7	1.61465e-69	0.309438	0.698	0.481	6.39755e-65	4.20705e-146	0.471092	0.587	0.266	1.66692e-141	1.61465e-69	8.4141e-146
2	St6gal1	1.11695e-87	0.332728	0.77	0.516	4.42558e-83	6.98995e-146	0.437966	0.598	0.266	2.76956e-141	1.11695e-87	1.39799e-145
2	Mmgt1	9.37044e-81	0.315857	0.647	0.417	3.71276e-76	1.03047e-141	0.421378	0.494	0.2	4.08295e-137	9.37044e-81	2.06095e-141
2	Rab33b	6.40912e-93	0.339861	0.708	0.457	2.53942e-88	1.5734e-141	0.414721	0.484	0.19	6.23412e-137	6.40912e-93	3.1468e-141
2	Tgfa	1.06483e-81	0.314772	0.735	0.49	4.21906e-77	4.91019e-137	0.429661	0.656	0.325	1.94552e-132	1.06483e-81	9.82038e-137
2	Myo18a	1.01925e-86	0.348025	0.727	0.498	4.03849e-82	8.69421e-135	0.473573	0.644	0.34	3.44482e-130	1.01925e-86	1.73884e-134
2	Dip2b	5.68181e-93	0.353408	0.789	0.567	2.25125e-88	1.68197e-134	0.464061	0.677	0.366	6.66429e-130	5.68181e-93	3.36393e-134
2	Abhd5	1.57018e-72	0.309148	0.633	0.414	6.22135e-68	1.21193e-132	0.41282	0.471	0.192	4.80191e-128	1.57018e-72	2.42386e-132
2	Spns2	6.60695e-95	0.331732	0.587	0.337	2.61781e-90	4.88243e-130	0.405272	0.459	0.186	1.93452e-125	6.60695e-95	9.76486e-130
2	Epdr1	5.65674e-86	0.318266	0.577	0.33	2.24131e-81	2.25218e-128	0.348431	0.372	0.124	8.92359e-124	5.65674e-86	4.50436e-128
2	Cyth1	1.42389e-73	0.305852	0.7	0.489	5.64173e-69	5.66397e-127	0.401114	0.515	0.225	2.24418e-122	1.42389e-73	1.13279e-126
2	Hipk2	1.35857e-99	0.37503	0.741	0.495	5.38292e-95	1.00577e-118	0.407777	0.549	0.262	3.98507e-114	1.35857e-99	2.01154e-118
2	Evi2a	4.03503e-118	0.374759	0.936	0.717	1.59876e-113	8.28218e-106	0.384899	0.857	0.591	3.28157e-101	8.28218e-106	8.07005e-118
2	Pogk	4.39657e-75	0.318733	0.662	0.43	1.74201e-70	4.79863e-116	0.402595	0.503	0.227	1.90131e-111	4.39657e-75	9.59726e-116
2	Arid5b	8.16097e-65	0.316477	0.811	0.617	3.23354e-60	6.43017e-116	0.426413	0.696	0.382	2.54776e-111	8.16097e-65	1.28603e-115
2	Megf9	3.80443e-90	0.306433	0.698	0.418	1.50739e-85	8.52353e-116	0.345066	0.433	0.17	3.37719e-111	3.80443e-90	1.70471e-115
2	Pde4b	3.09142e-111	0.373589	0.909	0.624	1.22488e-106	2.30837e-114	0.412384	0.756	0.451	9.14624e-110	3.09142e-111	4.61675e-114
2	Pim3	2.79889e-69	0.310058	0.685	0.469	1.10897e-64	4.36147e-114	0.520547	0.624	0.342	1.7281e-109	2.79889e-69	8.72294e-114
2	Zeb2	3.1033e-110	0.372211	0.978	0.821	1.22959e-105	5.51761e-83	0.354615	0.905	0.695	2.18619e-78	5.51761e-83	6.2066e-110
2	Gria4	2.01293e-87	0.316965	0.424	0.202	7.97563e-83	4.27864e-103	0.304428	0.322	0.111	1.69528e-98	2.01293e-87	8.55728e-103
2	Macir	4.01037e-88	0.333209	0.767	0.53	1.58899e-83	2.87603e-101	0.368886	0.533	0.264	1.13954e-96	4.01037e-88	5.75206e-101
2	Retreg1	5.85978e-91	0.329574	0.893	0.709	2.32176e-86	1.22774e-90	0.373999	0.802	0.553	4.86456e-86	1.22774e-90	1.17196e-90
2	Akap11	6.1589e-71	0.309945	0.783	0.583	2.44028e-66	4.7774e-86	0.367922	0.595	0.337	1.8929e-81	6.1589e-71	9.55481e-86
2	Itch	1.08846e-76	0.300432	0.799	0.594	4.31268e-72	3.23e-73	0.344489	0.614	0.388	1.27979e-68	3.23e-73	2.17691e-76
3	Ptgds	0	1.40924	0.997	0.795	0	0	1.95821	0.997	0.375	0	0	0
3	Igtp	0	1.03335	0.999	0.694	0	0	1.60661	0.989	0.492	0	0	0
3	Tspan2	0	0.99761	1	0.65	0	0	1.72811	1	0.301	0	0	0
3	Hhip	0	0.975184	0.946	0.424	0	0	1.34404	0.912	0.185	0	0	0
3	Mal	0	0.920084	1	0.66	0	0	1.77841	1	0.274	0	0	0
3	Il33	0	0.908412	1	0.586	0	0	1.51965	0.993	0.226	0	0	0
3	Ptn	0	0.906482	0.973	0.494	0	0	1.48116	0.996	0.256	0	0	0
3	Sema6d	0	0.894756	0.956	0.477	0	0	1.30055	0.922	0.203	0	0	0
3	Irgm2	0	0.863989	0.998	0.728	0	0	1.30425	0.983	0.48	0	0	0
3	Gm12250	0	0.863058	0.898	0.382	0	0	1.17293	0.821	0.202	0	0	0
3	Tmod2	0	0.860805	0.998	0.591	0	0	1.37001	0.996	0.288	0	0	0
3	Tubb4a	0	0.857689	1	0.707	0	0	1.55181	1	0.434	0	0	0
3	Opalin	0	0.845452	0.952	0.395	0	0	1.42975	0.97	0.197	0	0	0
3	Tgtp2	0	0.841942	0.942	0.507	0	7.18861e-263	1.03667	0.85	0.314	2.84827e-258	7.18861e-263	0
3	Ptprd	0	0.827558	0.999	0.57	0	0	1.54942	1	0.275	0	0	0
3	Plekha1	0	0.826011	0.981	0.678	0	1.68975e-291	1.127	0.946	0.469	6.69511e-287	1.68975e-291	0
3	Grb14	0	0.779313	0.989	0.533	0	0	1.2737	0.972	0.238	0	0	0
3	Irgm1	0	0.769007	0.996	0.794	0	1.68029e-224	0.940198	0.977	0.655	6.65766e-220	1.68029e-224	0
3	App	0	0.71549	1	0.936	0	0	1.3684	1	0.828	0	0	0
3	Enpp2	1.21434e-305	0.776147	1	0.763	4.81144e-301	0	1.51572	1	0.369	0	1.21434e-305	0
3	Cryab	3.49296e-305	0.782931	0.999	0.631	1.38398e-300	0	1.51866	1	0.312	0	3.49296e-305	0
3	Serinc5	1.37918e-304	0.748629	0.97	0.512	5.4646e-300	0	1.04496	0.911	0.251	0	1.37918e-304	0
3	Pex5l	4.05319e-302	0.833827	0.994	0.591	1.60596e-297	0	1.32372	0.965	0.24	0	4.05319e-302	0
3	Zfp365	7.64909e-301	0.773184	0.963	0.508	3.03072e-296	0	1.07578	0.893	0.227	0	7.64909e-301	0
3	Gpr37	1.28537e-300	0.735794	0.998	0.547	5.09291e-296	0	1.46729	0.999	0.23	0	1.28537e-300	0
3	Ccp110	1.36103e-299	0.74089	0.963	0.538	5.39266e-295	0	1.08072	0.907	0.263	0	1.36103e-299	0
3	Cnp	5.1166e-298	0.745265	1	0.747	2.0273e-293	0	1.47852	1	0.489	0	5.1166e-298	0
3	Mapt	1.66306e-297	0.731994	1	0.622	6.58936e-293	0	1.32159	0.997	0.325	0	1.66306e-297	0
3	Septin4	1.6615e-292	0.750575	1	0.654	6.58321e-288	0	1.46704	1	0.289	0	1.6615e-292	0
3	Arap2	1.1014e-285	0.755074	0.993	0.577	4.36396e-281	0	1.16472	0.929	0.254	0	1.1014e-285	0
3	Nfasc	6.60555e-284	0.671708	0.995	0.582	2.61725e-279	0	0.894129	0.986	0.3	0	6.60555e-284	0
3	Qdpr	2.78314e-278	0.736319	1	0.76	1.10274e-273	0	1.34412	0.999	0.471	0	2.78314e-278	0
3	Gstp-ps	3.68689e-274	0.710092	0.923	0.493	1.46082e-269	0	1.05946	0.836	0.221	0	3.68689e-274	0
3	Gjc3	1.11273e-273	0.728767	0.997	0.556	4.40887e-269	0	1.10986	0.982	0.279	0	1.11273e-273	0
3	Pllp	2.28744e-269	0.656884	0.953	0.501	9.0633e-265	0	1.18626	0.977	0.26	0	2.28744e-269	0
3	Car2	8.0822e-266	0.776682	1	0.859	3.20233e-261	0	1.64226	1	0.397	0	8.0822e-266	0
3	Mcam	4.50901e-259	0.558395	0.632	0.202	1.78656e-254	0	0.798231	0.617	0.109	0	4.50901e-259	0
3	Lgi3	2.17243e-258	0.587784	0.798	0.349	8.60759e-254	0	0.899951	0.751	0.17	0	2.17243e-258	0
3	Hepacam	5.63988e-256	0.618237	0.904	0.451	2.23463e-251	0	1.08221	0.931	0.216	0	5.63988e-256	0
3	Ttll7	5.84573e-254	0.682009	0.99	0.543	2.3162e-249	0	1.23262	0.969	0.228	0	5.84573e-254	0
3	Sema6a	5.39968e-250	0.687685	0.832	0.396	2.13946e-245	0	0.997766	0.812	0.201	0	5.39968e-250	0
3	Slc24a2	3.11173e-247	0.675106	0.988	0.557	1.23293e-242	0	1.16812	0.965	0.248	0	3.11173e-247	0
3	Syt11	9.35578e-246	0.669538	1	0.678	3.70695e-241	0	1.28592	1	0.424	0	9.35578e-246	0
3	Chn2	1.34932e-243	0.633266	0.924	0.515	5.34628e-239	0	0.912713	0.925	0.315	0	1.34932e-243	0
3	Clmn	1.38083e-242	0.638154	0.911	0.464	5.47113e-238	0	1.00537	0.852	0.191	0	1.38083e-242	0
3	Rcan2	1.72886e-242	0.621708	0.961	0.522	6.85011e-238	0	1.08002	0.924	0.233	0	1.72886e-242	0
3	Kcna6	2.07846e-241	0.599161	0.914	0.459	8.23527e-237	0	0.97968	0.833	0.2	0	2.07846e-241	0
3	Gprc5b	9.05503e-238	0.601578	0.948	0.501	3.58778e-233	0	1.05243	0.905	0.22	0	9.05503e-238	0
3	Myrf	2.52332e-237	0.659357	0.997	0.577	9.99789e-233	0	1.25618	0.996	0.272	0	2.52332e-237	0
3	Lrrn1	7.12332e-234	0.635198	0.971	0.511	2.8224e-229	0	1.16621	0.952	0.246	0	7.12332e-234	0
3	Aplp1	2.95321e-232	0.708402	1	0.791	1.17012e-227	0	1.48236	1	0.428	0	2.95321e-232	0
3	Lpar1	1.77186e-230	0.652689	0.918	0.483	7.02046e-226	0	1.24491	0.917	0.204	0	1.77186e-230	0
3	Sox10	2.48363e-229	0.628429	0.987	0.559	9.84065e-225	0	0.92168	0.962	0.278	0	2.48363e-229	0
3	Kndc1	3.24104e-228	0.62202	0.938	0.5	1.28417e-223	0	0.931179	0.832	0.202	0	3.24104e-228	0
3	Ank3	3.2287e-227	0.609318	0.98	0.543	1.27928e-222	0	1.07048	0.956	0.277	0	3.2287e-227	0
3	Edil3	5.56534e-227	0.632678	0.995	0.552	2.2051e-222	0	1.23472	0.983	0.251	0	5.56534e-227	0
3	Clip3	7.56102e-225	0.613698	0.959	0.544	2.99583e-220	0	0.931075	0.901	0.263	0	7.56102e-225	0
3	Jam3	7.81911e-225	0.578128	0.939	0.502	3.09809e-220	0	1.00738	0.879	0.227	0	7.81911e-225	0
3	Cldn11	4.41727e-221	0.707811	1	0.879	1.75021e-216	0	1.51671	1	0.435	0	4.41727e-221	0
3	Slc12a2	2.65609e-219	0.656388	1	0.73	1.05239e-214	0	1.27058	1	0.493	0	2.65609e-219	0
3	Kif21a	3.72952e-219	0.603764	0.939	0.503	1.47771e-214	0	1.01552	0.904	0.24	0	3.72952e-219	0
3	Smco3	1.34054e-218	0.586281	0.798	0.372	5.31147e-214	0	0.817445	0.667	0.131	0	1.34054e-218	0
3	Ppp1r16b	3.31727e-218	0.606606	0.952	0.53	1.31437e-213	0	1.15302	0.965	0.278	0	3.31727e-218	0
3	Agap1	2.46125e-217	0.593935	0.964	0.554	9.75197e-213	0	0.954288	0.9	0.271	0	2.46125e-217	0
3	Mog	3.71502e-217	0.615841	0.998	0.584	1.47196e-212	0	1.33655	0.996	0.252	0	3.71502e-217	0
3	Arhgap23	4.09671e-215	0.600871	0.992	0.575	1.6232e-210	0	1.21872	0.992	0.29	0	4.09671e-215	0
3	Tppp	2.56702e-212	0.620084	0.998	0.577	1.0171e-207	0	1.18446	0.993	0.304	0	2.56702e-212	0
3	Ddr1	7.84371e-212	0.559121	0.958	0.513	3.10783e-207	0	0.991996	0.907	0.244	0	7.84371e-212	0
3	Anks1b	1.14684e-210	0.573894	0.93	0.487	4.544e-206	0	1.14722	0.925	0.244	0	1.14684e-210	0
3	Slc9a3r2	4.05846e-206	0.537947	0.616	0.236	1.60804e-201	0	0.733419	0.585	0.1	0	4.05846e-206	0
3	Mag	5.77981e-205	0.665094	1	0.759	2.29008e-200	0	1.45378	1	0.384	0	5.77981e-205	0
3	Aspa	1.17518e-204	0.599083	0.992	0.561	4.6563e-200	0	1.22998	0.966	0.225	0	1.17518e-204	0
3	Gnao1	1.49304e-204	0.614541	0.999	0.633	5.91573e-200	0	1.19437	0.993	0.327	0	1.49304e-204	0
3	Trim2	2.02251e-204	0.58368	0.96	0.548	8.01358e-200	0	1.04613	0.948	0.298	0	2.02251e-204	0
3	Srcin1	2.17404e-204	0.55926	0.92	0.499	8.61398e-200	0	0.901923	0.853	0.238	0	2.17404e-204	0
3	S1pr5	1.50396e-203	0.558403	0.948	0.496	5.95898e-199	0	0.893867	0.818	0.185	0	1.50396e-203	0
3	Tmeff2	1.20825e-201	0.563564	0.92	0.489	4.78734e-197	0	1.0239	0.867	0.222	0	1.20825e-201	0
3	Ablim2	6.21901e-200	0.471406	0.605	0.229	2.4641e-195	0	0.741054	0.613	0.122	0	6.21901e-200	0
3	Cdc42bpa	2.6307e-199	0.578978	0.956	0.544	1.04234e-194	0	1.05322	0.897	0.251	0	2.6307e-199	0
3	Map7	7.20003e-199	0.561574	0.988	0.563	2.8528e-194	0	1.07084	0.953	0.268	0	7.20003e-199	0
3	Pde8a	4.83806e-197	0.529651	0.855	0.453	1.91693e-192	0	0.747567	0.727	0.168	0	4.83806e-197	0
3	Capn5	1.21805e-196	0.468377	0.588	0.217	4.82615e-192	0	0.90074	0.718	0.154	0	1.21805e-196	0
3	Efnb3	4.92405e-196	0.553677	0.97	0.521	1.95101e-191	0	1.36146	1	0.253	0	4.92405e-196	0
3	Ppp1r14a	1.23253e-195	0.535164	0.938	0.511	4.88353e-191	0	0.95433	0.835	0.193	0	1.23253e-195	0
3	Mbp	6.15548e-195	0.635482	1	0.788	2.43892e-190	0	1.43298	1	0.489	0	6.15548e-195	0
3	Scd2	7.26668e-195	0.657555	1	0.768	2.87921e-190	0	1.41853	1	0.483	0	7.26668e-195	0
3	Map1a	3.85982e-194	0.555959	0.966	0.534	1.52934e-189	0	1.02716	0.915	0.261	0	3.85982e-194	0
3	Map6d1	4.9469e-194	0.554775	0.903	0.491	1.96006e-189	0	0.913803	0.856	0.213	0	4.9469e-194	0
3	Kcna1	8.17195e-193	0.572241	0.98	0.52	3.23789e-188	0	1.17591	0.936	0.226	0	8.17195e-193	0
3	Prr18	1.65268e-192	0.529073	0.906	0.472	6.54825e-188	0	1.03441	0.9	0.208	0	1.65268e-192	0
3	Csrp1	3.60608e-191	0.522491	0.845	0.456	1.4288e-186	0	0.83807	0.778	0.196	0	3.60608e-191	0
3	Cntn2	9.09337e-189	0.561813	0.997	0.588	3.60297e-184	0	1.29193	0.999	0.256	0	9.09337e-189	0
3	Osbpl1a	1.74526e-188	0.542399	0.962	0.603	6.91507e-184	0	1.00741	0.948	0.338	0	1.74526e-188	0
3	Sox2ot	1.96173e-187	0.537396	0.891	0.474	7.77278e-183	0	0.992191	0.888	0.221	0	1.96173e-187	0
3	Slc48a1	1.22421e-186	0.515274	0.978	0.67	4.85058e-182	0	1.08187	0.972	0.414	0	1.22421e-186	0
3	Zfp536	2.1666e-186	0.525968	0.84	0.426	8.58452e-182	0	0.810088	0.694	0.153	0	2.1666e-186	0
3	Aatk	1.25322e-185	0.514437	0.973	0.563	4.96549e-181	0	0.897253	0.877	0.255	0	1.25322e-185	0
3	Phlpp1	1.98349e-184	0.529478	0.966	0.605	7.85897e-180	0	1.01422	0.942	0.307	0	1.98349e-184	0
3	Sh3gl3	8.54661e-184	0.505458	0.738	0.36	3.38634e-179	0	0.80441	0.734	0.176	0	8.54661e-184	0
3	Limch1	4.47879e-183	0.527447	0.954	0.509	1.77459e-178	0	1.0211	0.915	0.22	0	4.47879e-183	0
3	ENSMUSG00000120976	1.35883e-182	0.566235	0.988	0.55	5.38397e-178	0	1.23431	0.956	0.237	0	1.35883e-182	0
3	Adamtsl1	1.76435e-182	0.508306	0.677	0.302	6.99069e-178	0	0.837191	0.669	0.115	0	1.76435e-182	0
3	Pcdh9	4.76244e-182	0.555885	0.967	0.52	1.88697e-177	0	1.10327	0.925	0.234	0	4.76244e-182	0
3	Abca2	4.58749e-179	0.510724	0.976	0.6	1.81765e-174	0	1.06905	0.959	0.316	0	4.58749e-179	0
3	Phyhipl	1.49213e-178	0.522744	0.938	0.514	5.91213e-174	0	0.89382	0.939	0.265	0	1.49213e-178	0
3	Mobp	1.24125e-177	0.573341	0.996	0.61	4.91808e-173	0	1.33814	0.996	0.247	0	1.24125e-177	0
3	Carhsp1	1.66719e-177	0.506664	0.952	0.555	6.60572e-173	0	0.957277	0.908	0.28	0	1.66719e-177	0
3	Arhgef10	1.75011e-177	0.497706	0.911	0.505	6.93429e-173	0	0.925132	0.867	0.234	0	1.75011e-177	0
3	Myo6	1.54095e-176	0.513908	0.945	0.542	6.10556e-172	0	0.948265	0.887	0.255	0	1.54095e-176	0
3	Tubb3	2.52406e-176	0.540604	0.942	0.555	1.00008e-171	0	0.966413	0.799	0.193	0	2.52406e-176	0
3	Slain1	3.82368e-176	0.507231	0.975	0.532	1.51502e-171	0	0.979878	0.932	0.239	0	3.82368e-176	0
3	Trim59	3.80706e-175	0.51943	0.934	0.53	1.50843e-170	0	0.953319	0.87	0.25	0	3.80706e-175	0
3	Efhd1	4.18556e-174	0.491396	0.877	0.456	1.6584e-169	0	0.885998	0.843	0.188	0	4.18556e-174	0
3	Ank2	4.92542e-173	0.523974	0.973	0.573	1.95155e-168	0	1.02144	0.955	0.298	0	4.92542e-173	0
3	Tnfaip6	9.23974e-173	0.50955	0.954	0.537	3.66097e-168	0	1.01574	0.924	0.244	0	9.23974e-173	0
3	Tspan15	1.63331e-172	0.484166	0.889	0.48	6.4715e-168	0	0.864095	0.806	0.201	0	1.63331e-172	0
3	Slc44a1	3.4353e-171	0.553405	1	0.692	1.36113e-166	0	1.11135	0.997	0.374	0	3.4353e-171	0
3	Prnp	2.27461e-170	0.550076	0.999	0.671	9.01246e-166	0	1.21975	0.999	0.347	0	2.27461e-170	0
3	Tmem98	2.17491e-169	0.508535	0.915	0.498	8.61742e-165	0	0.886689	0.78	0.184	0	2.17491e-169	0
3	Plekhh1	2.93847e-166	0.494683	0.979	0.54	1.16428e-161	0	1.06687	0.953	0.219	0	2.93847e-166	0
3	Kif1a	3.21159e-162	0.470918	0.932	0.533	1.27249e-157	0	0.967117	0.935	0.281	0	3.21159e-162	0
3	Tmem88b	9.68782e-160	0.580632	0.999	0.597	3.83851e-155	0	1.35565	0.997	0.27	0	9.68782e-160	0
3	Sv2a	1.04315e-157	0.489516	0.976	0.562	4.13315e-153	0	1.09437	0.973	0.303	0	1.04315e-157	0
3	Ugt8a	1.31426e-157	0.5142	0.995	0.558	5.20736e-153	0	1.1629	0.993	0.271	0	1.31426e-157	0
3	Usp54	2.01952e-155	0.446814	0.879	0.488	8.00174e-151	0	0.81559	0.785	0.199	0	2.01952e-155	0
3	Unc5b	1.12169e-154	0.449825	0.843	0.458	4.44436e-150	0	0.835328	0.78	0.189	0	1.12169e-154	0
3	Plekhb1	3.84294e-154	0.513542	0.998	0.595	1.52265e-149	0	1.19296	0.994	0.285	0	3.84294e-154	0
3	Grm3	1.39845e-152	0.437046	0.759	0.379	5.54095e-148	0	0.857241	0.753	0.156	0	1.39845e-152	0
3	Omg	3.45264e-152	0.480392	0.888	0.484	1.36801e-147	0	1.12341	0.938	0.248	0	3.45264e-152	0
3	Ypel2	2.15973e-151	0.460153	0.882	0.505	8.55727e-147	0	0.985273	0.846	0.234	0	2.15973e-151	0
3	Desi1	2.20291e-149	0.453791	0.792	0.448	8.72835e-145	0	1.00671	0.88	0.267	0	2.20291e-149	0
3	Fa2h	2.85674e-146	0.463316	0.991	0.543	1.1319e-141	0	1.12629	0.987	0.262	0	2.85674e-146	0
3	Stmn4	5.8694e-144	0.436534	0.859	0.484	2.32557e-139	0	0.860697	0.808	0.191	0	5.8694e-144	0
3	Elavl3	1.06228e-142	0.451643	0.963	0.553	4.20895e-138	0	1.04736	0.968	0.282	0	1.06228e-142	0
3	Cadm4	5.37585e-136	0.415181	0.866	0.478	2.13002e-131	0	0.914782	0.921	0.257	0	5.37585e-136	0
3	Sec14l5	1.04744e-135	0.416893	0.903	0.501	4.15018e-131	0	0.852484	0.814	0.195	0	1.04744e-135	0
3	Cmtm5	2.41636e-135	0.421087	0.916	0.523	9.5741e-131	0	1.08639	0.976	0.251	0	2.41636e-135	0
3	Gpm6b	4.92015e-135	0.502923	0.999	0.638	1.94946e-130	0	1.17734	0.999	0.345	0	4.92015e-135	0
3	Tmeff1	3.78991e-133	0.40618	0.943	0.537	1.50164e-128	0	0.962713	0.887	0.247	0	3.78991e-133	0
3	Endod1	1.17655e-129	0.457068	0.999	0.676	4.66171e-125	0	1.18445	0.987	0.401	0	1.17655e-129	0
3	Ttyh2	4.27993e-125	0.39684	0.89	0.536	1.69579e-120	0	0.9782	0.917	0.258	0	4.27993e-125	0
3	Rhou	5.59769e-125	0.385196	0.927	0.514	2.21792e-120	0	0.948932	0.886	0.226	0	5.59769e-125	0
3	Fgfr2	6.92996e-124	0.397867	0.935	0.514	2.74579e-119	0	1.00114	0.9	0.21	0	6.92996e-124	0
3	Nrbp2	3.63078e-123	0.398631	0.95	0.572	1.43859e-118	0	1.12226	0.983	0.273	0	3.63078e-123	0
3	Ermn	5.00642e-114	0.519974	1	0.634	1.98364e-109	0	1.36943	1	0.252	0	5.00642e-114	0
3	Pls1	7.22758e-114	0.395351	0.816	0.463	2.86371e-109	0	0.84992	0.822	0.19	0	7.22758e-114	0
3	Gnai1	3.82749e-106	0.314133	0.935	0.512	1.51653e-101	0	0.895572	0.904	0.242	0	3.82749e-106	0
3	Ndrg1	1.73501e-101	0.385279	0.998	0.625	6.87447e-97	0	1.16048	0.992	0.29	0	1.73501e-101	0
3	Fam171b	1.96097e-96	0.33556	0.921	0.53	7.76976e-92	1.13038e-307	0.892903	0.895	0.254	4.4788e-303	1.96097e-96	2.26076e-307
3	Tmem229a	5.51405e-155	0.450855	0.917	0.491	2.18478e-150	8.41775e-307	0.82098	0.797	0.198	3.33528e-302	5.51405e-155	1.68355e-306
3	Ppp2r3a	1.33638e-182	0.535041	0.909	0.503	5.29499e-178	4.44143e-306	0.869314	0.871	0.248	1.75978e-301	1.33638e-182	8.88286e-306
3	Rtkn	5.40783e-166	0.455771	0.745	0.374	2.14269e-161	7.88609e-306	0.797123	0.718	0.174	3.12463e-301	5.40783e-166	1.57722e-305
3	Otud7b	3.76306e-156	0.468153	0.955	0.575	1.491e-151	2.72357e-305	0.929885	0.927	0.305	1.07913e-300	3.76306e-156	5.44715e-305
3	Wscd1	2.77251e-180	0.500042	0.854	0.458	1.09852e-175	6.58797e-305	0.849149	0.849	0.236	2.61029e-300	2.77251e-180	1.31759e-304
3	Kcnj10	2.42777e-190	0.564203	0.991	0.597	9.61933e-186	2.71964e-302	0.986229	0.935	0.31	1.07758e-297	2.42777e-190	5.43929e-302
3	Insc	7.49172e-164	0.457633	0.834	0.432	2.96837e-159	4.70076e-301	0.752248	0.73	0.169	1.86254e-296	7.49172e-164	9.40152e-301
3	Ywhaq	1.0157e-259	0.617325	0.999	0.846	4.02443e-255	4.22484e-300	1.14123	0.997	0.641	1.67397e-295	1.0157e-259	8.44968e-300
3	Kif1b	1.34522e-142	0.521099	1	0.75	5.33004e-138	4.63679e-300	1.21222	1	0.497	1.83719e-295	1.34522e-142	9.27357e-300
3	Rnf13	2.51752e-214	0.547512	0.999	0.848	9.9749e-210	5.40328e-300	1.08774	0.999	0.671	2.14089e-295	2.51752e-214	1.08066e-299
3	Cerox1	1.07987e-138	0.424403	0.772	0.415	4.27864e-134	6.92498e-300	0.877472	0.785	0.208	2.74381e-295	1.07987e-138	1.385e-299
3	Frmd5	3.22334e-193	0.547867	0.803	0.407	1.27715e-188	1.19268e-296	0.742597	0.661	0.148	4.72564e-292	3.22334e-193	2.38536e-296
3	Enpp5	5.44959e-200	0.547467	0.913	0.536	2.15924e-195	1.56365e-296	0.840243	0.852	0.261	6.19551e-292	5.44959e-200	3.12731e-296
3	Olig1	2.91928e-241	0.590914	0.948	0.484	1.15668e-236	4.95576e-296	0.772243	0.874	0.242	1.96357e-291	2.91928e-241	9.91152e-296
3	Olig2	2.89244e-294	0.740865	0.941	0.466	1.14604e-289	1.05671e-295	0.788348	0.828	0.217	4.1869e-291	2.89244e-294	2.11342e-295
3	Add1	4.81053e-294	0.703381	0.983	0.72	1.90603e-289	1.48987e-222	0.881328	0.931	0.493	5.90317e-218	1.48987e-222	9.62106e-294
3	Stmn1	1.21653e-94	0.339472	0.997	0.68	4.82013e-90	8.57423e-293	1.03079	0.996	0.365	3.39728e-288	1.21653e-94	1.71485e-292
3	Prox1	9.07666e-180	0.547406	0.939	0.514	3.59635e-175	1.80659e-292	0.889288	0.842	0.243	7.15808e-288	9.07666e-180	3.61319e-292
3	Dip2a	1.73723e-104	0.342996	0.942	0.575	6.88325e-100	2.1278e-289	0.870978	0.898	0.276	8.43078e-285	1.73723e-104	4.2556e-289
3	Erbin	1.22803e-270	0.659236	0.995	0.827	4.86571e-266	2.48602e-289	1.03616	0.993	0.597	9.85009e-285	1.22803e-270	4.97203e-289
3	Cers2	9.2143e-202	0.527488	0.991	0.767	3.65089e-197	1.26685e-288	1.059	0.994	0.668	5.01952e-284	9.2143e-202	2.5337e-288
3	Tprn	1.15181e-137	0.421943	0.797	0.44	4.56369e-133	7.27509e-288	0.844725	0.768	0.211	2.88254e-283	1.15181e-137	1.45502e-287
3	Mast4	6.06533e-140	0.426975	0.884	0.495	2.4032e-135	8.84e-288	0.811685	0.764	0.199	3.50259e-283	6.06533e-140	1.768e-287
3	Arsg	1.95337e-117	0.382259	0.849	0.496	7.73965e-113	9.94726e-287	0.841635	0.799	0.221	3.9413e-282	1.95337e-117	1.98945e-286
3	Cystm1	4.31942e-124	0.395273	0.894	0.53	1.71144e-119	2.42076e-286	0.859151	0.839	0.245	9.59155e-282	4.31942e-124	4.84153e-286
3	Gjc2	6.71643e-132	0.429731	0.84	0.474	2.66119e-127	1.73949e-285	0.765349	0.749	0.183	6.89221e-281	6.71643e-132	3.47898e-285
3	Iigp1	2.26343e-273	0.851532	0.982	0.671	8.96818e-269	5.4174e-284	1.4553	0.938	0.452	2.14648e-279	2.26343e-273	1.08348e-283
3	X5031439G07Rik	3.79287e-253	0.637136	0.98	0.666	1.50281e-248	5.42284e-279	0.986238	0.959	0.441	2.14864e-274	3.79287e-253	1.08457e-278
3	Pak1	2.66836e-209	0.563527	0.935	0.6	1.05726e-204	8.89087e-278	0.995979	0.949	0.448	3.52274e-273	2.66836e-209	1.77817e-277
3	C4b	2.21166e-216	0.585787	0.991	0.664	8.76303e-212	1.15543e-277	1.12232	0.993	0.509	4.57803e-273	2.21166e-216	2.31085e-277
3	Kazn	4.26081e-152	0.446769	0.808	0.429	1.68822e-147	2.01915e-277	0.768338	0.787	0.21	8.00026e-273	4.26081e-152	4.03829e-277
3	Kirrel3	5.43814e-276	0.541871	0.553	0.147	2.1547e-271	4.46804e-265	0.615444	0.445	0.072	1.77033e-260	4.46804e-265	1.08763e-275
3	Epb41l3	2.06195e-105	0.36291	0.934	0.617	8.16985e-101	6.48444e-276	0.863073	0.928	0.323	2.56927e-271	2.06195e-105	1.29689e-275
3	Trf	1.84714e-117	0.440185	1	0.887	7.31872e-113	2.09251e-275	1.31997	1	0.74	8.29094e-271	1.84714e-117	4.18502e-275
3	Plp1	4.13915e-160	0.640347	1	0.976	1.64001e-155	4.75492e-274	1.4842	1	0.717	1.88399e-269	4.13915e-160	9.50983e-274
3	Jph4	1.66658e-97	0.433944	0.561	0.285	6.60332e-93	5.14869e-274	0.859058	0.709	0.177	2.04001e-269	1.66658e-97	1.02974e-273
3	Klhl2	2.50153e-191	0.546882	0.973	0.601	9.91156e-187	1.15776e-271	0.85162	0.884	0.296	4.58728e-267	2.50153e-191	2.31552e-271
3	Add3	3.38731e-270	0.680267	0.982	0.658	1.34212e-265	2.82696e-240	0.910422	0.938	0.417	1.1201e-235	2.82696e-240	6.77461e-270
3	Adamts4	5.367e-118	0.398636	0.794	0.438	2.12651e-113	1.60148e-269	0.7533	0.72	0.182	6.34538e-265	5.367e-118	3.20296e-269
3	Il1rap	3.12645e-135	0.432971	0.898	0.519	1.23876e-130	2.53894e-269	0.835875	0.816	0.245	1.00598e-264	3.12645e-135	5.07788e-269
3	Psat1	3.74646e-152	0.486935	0.995	0.654	1.48442e-147	5.16598e-266	0.971119	0.984	0.431	2.04687e-261	3.74646e-152	1.0332e-265
3	Qk	9.16405e-198	0.558957	1	0.929	3.63098e-193	7.97902e-265	0.987061	1	0.859	3.16145e-260	9.16405e-198	1.5958e-264
3	Rtn4	7.25312e-160	0.516377	1	0.914	2.87383e-155	3.16703e-264	1.07775	1	0.791	1.25484e-259	7.25312e-160	6.33407e-264
3	Secisbp2l	1.80137e-147	0.449958	0.99	0.755	7.13738e-143	1.61222e-262	0.985244	0.979	0.524	6.38792e-258	1.80137e-147	3.22443e-262
3	Enpp4	5.93614e-159	0.494258	0.993	0.754	2.35202e-154	5.88735e-262	0.990967	0.975	0.48	2.33269e-257	5.93614e-159	1.17747e-261
3	Shroom2	2.562e-177	0.488582	0.796	0.399	1.01512e-172	9.55474e-262	0.746208	0.699	0.18	3.78578e-257	2.562e-177	1.91095e-261
3	Nkain2	2.34098e-108	0.34964	0.785	0.43	9.27543e-104	1.14384e-261	0.683632	0.653	0.154	4.53214e-257	2.34098e-108	2.28769e-261
3	Tulp4	3.43289e-164	0.519318	0.986	0.686	1.36018e-159	1.10233e-260	0.952031	0.955	0.414	4.36764e-256	3.43289e-164	2.20465e-260
3	Plcl1	3.23569e-159	0.472652	0.943	0.53	1.28205e-154	1.40872e-260	0.792536	0.799	0.24	5.58164e-256	3.23569e-159	2.81744e-260
3	Vldlr	3.39529e-176	0.520455	0.855	0.446	1.34528e-171	3.39372e-260	0.794689	0.749	0.205	1.34466e-255	3.39529e-176	6.78743e-260
3	Gm4951	8.59704e-218	0.656096	0.862	0.45	3.40632e-213	2.45741e-259	1.03173	0.788	0.263	9.73673e-255	8.59704e-218	4.91481e-259
3	Nipa1	3.35388e-95	0.31656	0.823	0.484	1.32888e-90	7.43062e-259	0.748803	0.768	0.214	2.94416e-254	3.35388e-95	1.48612e-258
3	Atp8a1	3.17418e-212	0.547372	0.996	0.816	1.25767e-207	2.16249e-258	0.965913	0.99	0.662	8.56823e-254	3.17418e-212	4.32499e-258
3	Abca8a	7.1248e-140	0.416848	0.438	0.15	2.82299e-135	2.56675e-258	0.762568	0.53	0.101	1.017e-253	7.1248e-140	5.1335e-258
3	Tyro3	1.44691e-91	0.300915	0.46	0.217	5.73297e-87	1.75873e-257	0.696107	0.648	0.156	6.96844e-253	1.44691e-91	3.51746e-257
3	Fermt2	6.16321e-127	0.385857	0.784	0.426	2.44199e-122	2.34367e-257	0.754805	0.794	0.229	9.28611e-253	6.16321e-127	4.68735e-257
3	Larp6	2.13302e-98	0.332541	0.631	0.342	8.45146e-94	5.95347e-257	0.651472	0.624	0.145	2.35888e-252	2.13302e-98	1.19069e-256
3	Gatm	7.13301e-192	0.580134	1	0.864	2.82624e-187	1.4017e-255	0.979451	1	0.793	5.5538e-251	7.13301e-192	2.80339e-255
3	Adamtsl4	8.31671e-105	0.35966	0.651	0.348	3.29525e-100	1.63871e-255	0.739698	0.71	0.186	6.4929e-251	8.31671e-105	3.27742e-255
3	Cdc37l1	9.90209e-175	0.510651	0.985	0.667	3.92341e-170	2.89479e-255	0.927212	0.956	0.408	1.14698e-250	9.90209e-175	5.78959e-255
3	Prickle1	4.06556e-188	0.490639	0.54	0.191	1.61086e-183	1.00492e-254	0.67399	0.566	0.12	3.9817e-250	4.06556e-188	2.00984e-254
3	Mbnl2	6.41794e-160	0.465723	0.998	0.777	2.54292e-155	1.39524e-254	0.923828	0.994	0.562	5.52822e-250	6.41794e-160	2.79048e-254
3	Neo1	9.79707e-147	0.444674	0.766	0.415	3.88179e-142	6.64901e-254	0.741525	0.761	0.217	2.63447e-249	9.79707e-147	1.3298e-253
3	Degs1	7.699e-170	0.471659	0.975	0.733	3.0505e-165	1.92913e-253	0.908293	0.969	0.488	7.64362e-249	7.699e-170	3.85827e-253
3	Thra	1.1889e-186	0.498158	0.938	0.529	4.71066e-182	3.89373e-252	0.751482	0.904	0.292	1.54277e-247	1.1889e-186	7.78746e-252
3	Phactr1	4.3284e-135	0.42525	0.828	0.468	1.715e-130	6.24422e-252	0.81045	0.778	0.237	2.47408e-247	4.3284e-135	1.24884e-251
3	Lrrc8b	2.44395e-152	0.460365	0.913	0.525	9.68341e-148	3.87168e-251	0.792845	0.825	0.255	1.53404e-246	2.44395e-152	7.74335e-251
3	Gab1	2.46157e-147	0.454707	0.902	0.531	9.75322e-143	2.96956e-250	0.805081	0.795	0.25	1.1766e-245	2.46157e-147	5.93911e-250
3	Ckb	3.59939e-249	0.647511	0.903	0.51	1.42615e-244	4.60165e-188	0.774165	0.883	0.435	1.82327e-183	4.60165e-188	7.19877e-249
3	Cilk1	4.05721e-202	0.536552	0.693	0.306	1.60755e-197	4.62443e-249	0.760779	0.672	0.18	1.83229e-244	4.05721e-202	9.24886e-249
3	Rtkn2	2.75146e-148	0.467128	0.685	0.327	1.09018e-143	2.24198e-248	0.621723	0.49	0.093	8.88317e-244	2.75146e-148	4.48396e-248
3	Tmod1	8.51042e-93	0.33201	0.548	0.277	3.372e-88	3.40862e-248	0.651815	0.579	0.128	1.35056e-243	8.51042e-93	6.81723e-248
3	Ncam1	8.89664e-151	0.440361	0.932	0.519	3.52503e-146	2.70188e-246	0.747761	0.893	0.279	1.07054e-241	8.89664e-151	5.40376e-246
3	Kcna2	2.82072e-246	0.665851	0.658	0.234	1.11763e-241	7.839e-160	0.589119	0.458	0.114	3.10597e-155	7.839e-160	5.64145e-246
3	Cntfr	2.08989e-231	0.582394	0.72	0.291	8.28056e-227	1.00209e-244	0.679922	0.588	0.134	3.97047e-240	2.08989e-231	2.00418e-244
3	Pdlim2	7.53035e-111	0.37825	0.829	0.494	2.98367e-106	1.14742e-244	0.845877	0.815	0.264	4.5463e-240	7.53035e-111	2.29483e-244
3	Dbi	3.92827e-217	0.568275	0.998	0.771	1.55646e-212	1.00206e-241	0.934805	0.99	0.573	3.97037e-237	3.92827e-217	2.00412e-241
3	St18	7.38025e-137	0.416601	0.747	0.387	2.9242e-132	9.09672e-241	0.696337	0.637	0.159	3.6043e-236	7.38025e-137	1.81934e-240
3	Ano4	1.43112e-133	0.405605	0.609	0.288	5.67038e-129	3.91878e-235	0.62545	0.53	0.115	1.5527e-230	1.43112e-133	7.83756e-235
3	Foxn3	1.30977e-190	0.541807	0.984	0.703	5.18957e-186	2.84577e-234	0.900647	0.955	0.498	1.12755e-229	1.30977e-190	5.69155e-234
3	Tm7sf3	2.74871e-134	0.418625	0.931	0.582	1.08909e-129	3.368e-234	0.812881	0.89	0.339	1.33447e-229	2.74871e-134	6.736e-234
3	D7Ertd443e	2.91888e-145	0.433607	0.704	0.351	1.15652e-140	3.19024e-232	0.632544	0.541	0.12	1.26404e-227	2.91888e-145	6.38048e-232
3	Tmem132b	1.75061e-185	0.545379	0.654	0.277	6.93627e-181	1.01938e-231	0.654659	0.626	0.152	4.039e-227	1.75061e-185	2.03877e-231
3	Pou3f3	1.4142e-118	0.390357	0.788	0.44	5.60335e-114	1.95437e-231	0.709717	0.702	0.195	7.74361e-227	1.4142e-118	3.90874e-231
3	Serpina3n	5.41996e-108	0.315699	0.93	0.584	2.14749e-103	2.32382e-231	0.772881	0.791	0.236	9.20743e-227	5.41996e-108	4.64763e-231
3	Septin7	9.95505e-136	0.440322	0.998	0.883	3.94439e-131	5.45104e-231	0.957618	0.997	0.711	2.15981e-226	9.95505e-136	1.09021e-230
3	Gpr62	7.45227e-106	0.359846	0.664	0.359	2.95274e-101	1.41876e-229	0.663154	0.559	0.129	5.6214e-225	7.45227e-106	2.83752e-229
3	Itgb8	5.10341e-139	0.453899	0.83	0.458	2.02207e-134	2.22926e-228	0.714221	0.694	0.191	8.83276e-224	5.10341e-139	4.45851e-228
3	Arpc1a	3.5431e-228	0.571323	0.982	0.778	1.40385e-223	2.56293e-215	0.830904	0.968	0.567	1.01548e-210	2.56293e-215	7.08621e-228
3	Sox8	2.57335e-151	0.468176	0.856	0.467	1.01961e-146	3.5908e-228	0.713533	0.722	0.209	1.42275e-223	2.57335e-151	7.18159e-228
3	Shisa4	8.36414e-120	0.389611	0.738	0.401	3.31404e-115	6.32568e-228	0.693672	0.702	0.196	2.50636e-223	8.36414e-120	1.26514e-227
3	Tmcc3	4.11478e-135	0.432043	0.994	0.714	1.63036e-130	2.31956e-227	0.859318	0.979	0.523	9.19058e-223	4.11478e-135	4.63913e-227
3	Klf13	1.52672e-219	0.564387	0.986	0.718	6.04915e-215	6.59371e-227	0.882801	0.948	0.531	2.61256e-222	1.52672e-219	1.31874e-226
3	Tjp2	5.29913e-141	0.448575	0.855	0.522	2.09962e-136	1.44659e-226	0.743584	0.782	0.264	5.73167e-222	5.29913e-141	2.89317e-226
3	Frmd8	4.56908e-176	0.519544	0.927	0.609	1.81036e-171	9.40287e-226	0.845835	0.846	0.348	3.7256e-221	4.56908e-176	1.88057e-225
3	Ak3	5.44921e-111	0.37602	0.96	0.624	2.15909e-106	1.47279e-224	0.777961	0.887	0.339	5.83547e-220	5.44921e-111	2.94557e-224
3	Tmem125	3.10655e-103	0.363148	0.749	0.418	1.23088e-98	3.13874e-224	0.657201	0.629	0.158	1.24363e-219	3.10655e-103	6.27748e-224
3	Mat2a	3.26243e-224	0.571464	0.993	0.832	1.29264e-219	2.05878e-144	0.665125	0.958	0.667	8.15731e-140	2.05878e-144	6.52485e-224
3	Plpp3	4.10885e-190	0.536236	0.756	0.366	1.62801e-185	6.05126e-223	0.707416	0.678	0.19	2.39763e-218	4.10885e-190	1.21025e-222
3	Gbp7	1.21724e-211	0.601111	0.977	0.699	4.82296e-207	1.50779e-222	0.99701	0.959	0.567	5.97418e-218	1.21724e-211	3.01559e-222
3	Rnf7	7.40988e-171	0.490437	0.986	0.754	2.93594e-166	2.66116e-221	0.856968	0.958	0.524	1.0544e-216	7.40988e-171	5.32231e-221
3	Gm19439	2.64755e-96	0.324656	0.912	0.526	1.04901e-91	1.21962e-220	0.676927	0.702	0.191	4.83237e-216	2.64755e-96	2.43924e-220
3	Dpysl2	2.48778e-125	0.405864	0.988	0.779	9.85707e-121	2.52595e-220	0.845103	0.989	0.681	1.00083e-215	2.48778e-125	5.0519e-220
3	Dnaaf9	2.87539e-93	0.329554	0.77	0.471	1.13929e-88	3.75775e-219	0.697621	0.818	0.273	1.4889e-214	2.87539e-93	7.5155e-219
3	Clasp2	1.03445e-144	0.437271	0.984	0.743	4.09869e-140	3.86846e-219	0.827635	0.955	0.52	1.53276e-214	1.03445e-144	7.73691e-219
3	Ptk2	1.09983e-155	0.458731	0.788	0.427	4.35773e-151	1.73528e-218	0.68554	0.664	0.193	6.87553e-214	1.09983e-155	3.47056e-218
3	Atrn	4.05052e-104	0.376313	0.744	0.448	1.6049e-99	2.35498e-218	0.693272	0.751	0.247	9.33091e-214	4.05052e-104	4.70996e-218
3	Cep97	2.47302e-109	0.399473	0.631	0.339	9.79859e-105	6.39636e-218	0.65043	0.62	0.164	2.53436e-213	2.47302e-109	1.27927e-217
3	Plaat3	6.70965e-120	0.391023	0.986	0.76	2.6585e-115	2.60036e-217	0.810241	0.948	0.474	1.03032e-212	6.70965e-120	5.20072e-217
3	Klf9	5.37042e-177	0.547062	0.927	0.54	2.12787e-172	9.49052e-217	0.75537	0.784	0.259	3.76033e-212	5.37042e-177	1.8981e-216
3	Nedd4	2.73298e-133	0.40587	0.957	0.56	1.08286e-128	2.37637e-216	0.676698	0.91	0.306	9.41567e-212	2.73298e-133	4.75275e-216
3	Cfl2	5.54192e-133	0.429177	0.945	0.627	2.19582e-128	1.27997e-215	0.781348	0.886	0.362	5.07149e-211	5.54192e-133	2.55994e-215
3	Erbb3	2.9847e-122	0.42238	0.578	0.275	1.1826e-117	2.62264e-214	0.649166	0.556	0.136	1.03914e-209	2.9847e-122	5.24528e-214
3	Fnbp1	3.58857e-94	0.307807	0.98	0.787	1.42186e-89	1.78384e-213	0.827786	0.993	0.632	7.06794e-209	3.58857e-94	3.56768e-213
3	Ifi27	2.95708e-123	0.425663	0.88	0.634	1.17165e-118	5.14526e-212	0.799269	0.815	0.316	2.03865e-207	2.95708e-123	1.02905e-211
3	Cpm	2.29142e-101	0.353912	0.781	0.452	9.07906e-97	5.54549e-212	0.68466	0.669	0.188	2.19723e-207	2.29142e-101	1.1091e-211
3	Bace1	3.03184e-94	0.343966	0.698	0.396	1.20128e-89	1.46945e-210	0.649126	0.647	0.181	5.82227e-206	3.03184e-94	2.93891e-210
3	Galnt6	8.52766e-93	0.32301	0.677	0.377	3.37883e-88	3.63243e-209	0.654092	0.609	0.159	1.43924e-204	8.52766e-93	7.26486e-209
3	Fkbp1a	8.45795e-131	0.399504	0.994	0.832	3.35121e-126	3.79601e-208	0.815999	0.983	0.629	1.50405e-203	8.45795e-131	7.59201e-208
3	Clic4	3.59253e-207	0.509114	0.996	0.781	1.42343e-202	6.6475e-207	0.770343	0.99	0.659	2.63387e-202	6.6475e-207	7.18506e-207
3	Dlg1	9.83045e-176	0.502172	0.931	0.653	3.89502e-171	2.02709e-206	0.777803	0.91	0.435	8.03172e-202	9.83045e-176	4.05417e-206
3	Tuba1a	4.03001e-127	0.445401	0.998	0.79	1.59677e-122	7.17018e-206	0.759417	0.994	0.541	2.84097e-201	4.03001e-127	1.43404e-205
3	Slc38a2	1.14943e-205	0.628462	0.972	0.763	4.55426e-201	1.01118e-137	0.686506	0.942	0.641	4.0065e-133	1.01118e-137	2.29886e-205
3	Daam1	3.3788e-173	0.515656	0.938	0.655	1.33875e-168	2.91985e-205	0.852108	0.897	0.439	1.1569e-200	3.3788e-173	5.83971e-205
3	Map7d1	2.92143e-79	0.311394	0.692	0.441	1.15753e-74	3.04625e-205	0.790274	0.917	0.462	1.20699e-200	2.92143e-79	6.0925e-205
3	Grik2	4.78542e-184	0.523236	0.659	0.277	1.89608e-179	9.42887e-205	0.572404	0.47	0.101	3.73591e-200	4.78542e-184	1.88577e-204
3	Htra1	8.99565e-76	0.308044	0.522	0.283	3.56426e-71	1.16484e-204	0.670326	0.572	0.146	4.61534e-200	8.99565e-76	2.32969e-204
3	Sec11c	7.88669e-120	0.422207	0.998	0.852	3.12486e-115	1.46338e-204	0.875019	0.979	0.64	5.79819e-200	7.88669e-120	2.92675e-204
3	Hs3st1	3.55534e-110	0.395441	0.643	0.342	1.4087e-105	1.53227e-204	0.642119	0.504	0.118	6.07118e-200	3.55534e-110	3.06455e-204
3	Dpy19l1	3.41401e-144	0.454718	0.963	0.713	1.3527e-139	2.01716e-203	0.793906	0.944	0.496	7.9924e-199	3.41401e-144	4.03432e-203
3	Sulf2	7.48047e-203	0.549808	0.959	0.578	2.96391e-198	2.49384e-193	0.63864	0.88	0.345	9.8811e-189	2.49384e-193	1.49609e-202
3	Nckap1	3.59988e-99	0.346259	0.752	0.44	1.42635e-94	2.32571e-202	0.646966	0.801	0.261	9.21491e-198	3.59988e-99	4.65141e-202
3	Aplp2	2.41702e-123	0.379769	0.978	0.814	9.57671e-119	4.16419e-202	0.778069	0.966	0.572	1.64993e-197	2.41702e-123	8.32837e-202
3	Fbxl5	7.99218e-197	0.561778	0.866	0.541	3.16666e-192	4.71865e-202	0.735094	0.777	0.301	1.86962e-197	7.99218e-197	9.43729e-202
3	Igsf11	2.58698e-129	0.411874	0.809	0.446	1.02501e-124	9.10803e-202	0.64802	0.664	0.189	3.60878e-197	2.58698e-129	1.82161e-201
3	Car14	6.36472e-124	0.390602	0.683	0.35	2.52183e-119	9.93307e-201	0.614157	0.566	0.142	3.93568e-196	6.36472e-124	1.98661e-200
3	Bcas1	5.96314e-151	0.433194	0.866	0.496	2.36272e-146	1.13868e-200	0.346032	0.768	0.246	4.51168e-196	5.96314e-151	2.27736e-200
3	Phactr3	6.40607e-193	0.537766	0.667	0.292	2.53821e-188	1.20763e-200	0.57467	0.516	0.124	4.78487e-196	6.40607e-193	2.41526e-200
3	Nap1l5	2.1537e-150	0.536681	0.804	0.436	8.5334e-146	2.1836e-200	0.718215	0.691	0.207	8.65187e-196	2.1537e-150	4.3672e-200
3	Ncam2	6.69729e-151	0.472718	0.801	0.421	2.6536e-146	1.35346e-199	0.637906	0.636	0.178	5.36266e-195	6.69729e-151	2.70691e-199
3	Glul	6.12569e-162	0.557297	0.998	0.948	2.42712e-157	5.8614e-199	0.992963	1	0.829	2.3224e-194	6.12569e-162	1.17228e-198
3	Fads6	4.83354e-94	0.334225	0.656	0.364	1.91514e-89	6.33029e-196	0.574115	0.554	0.141	2.50819e-191	4.83354e-94	1.26606e-195
3	Gabbr1	5.05491e-112	0.36713	0.905	0.552	2.00285e-107	1.0446e-195	0.681934	0.849	0.316	4.13891e-191	5.05491e-112	2.0892e-195
3	Sytl2	1.8375e-92	0.341831	0.613	0.325	7.28056e-88	1.42501e-195	0.608276	0.561	0.145	5.64618e-191	1.8375e-92	2.85002e-195
3	Rab31	4.2097e-149	0.463671	0.933	0.624	1.66797e-144	8.75746e-193	0.762121	0.85	0.384	3.46988e-188	4.2097e-149	1.75149e-192
3	Bfsp2	1.28815e-191	0.49981	0.603	0.232	5.1039e-187	3.06345e-163	0.46226	0.446	0.106	1.2138e-158	3.06345e-163	2.5763e-191
3	Rcbtb1	1.09089e-114	0.366114	0.896	0.573	4.32231e-110	2.88514e-191	0.694315	0.782	0.294	1.14315e-186	1.09089e-114	5.77027e-191
3	Phldb1	5.13247e-114	0.352964	0.584	0.294	2.03359e-109	3.85369e-191	0.568463	0.52	0.132	1.52691e-186	5.13247e-114	7.70738e-191
3	Lap3	1.00394e-178	0.501125	0.977	0.745	3.9778e-174	1.2299e-190	0.762955	0.965	0.577	4.8731e-186	1.00394e-178	2.45979e-190
3	Cd9	1.92553e-190	0.455251	0.998	0.85	7.62933e-186	1.52912e-101	0.445085	0.999	0.796	6.05869e-97	1.52912e-101	3.85106e-190
3	Stk39	1.06645e-94	0.330814	0.804	0.479	4.22549e-90	6.16168e-190	0.658672	0.729	0.242	2.44138e-185	1.06645e-94	1.23234e-189
3	Sik3	6.05872e-83	0.316508	0.873	0.571	2.40059e-78	1.0751e-188	0.699192	0.777	0.296	4.25975e-184	6.05872e-83	2.15019e-188
3	Scrn1	6.23709e-149	0.441806	0.695	0.342	2.47126e-144	4.93284e-188	0.584317	0.575	0.157	1.95449e-183	6.23709e-149	9.86568e-188
3	Bche	3.09267e-80	0.330106	0.53	0.28	1.22538e-75	8.90863e-187	0.540335	0.441	0.096	3.52978e-182	3.09267e-80	1.78173e-186
3	Bpnt2	2.80757e-177	0.519425	0.948	0.68	1.11241e-172	6.81734e-186	0.781209	0.867	0.43	2.70116e-181	2.80757e-177	1.36347e-185
3	Reep3	3.53086e-103	0.335878	0.991	0.867	1.399e-98	9.6297e-185	0.716419	0.992	0.74	3.81548e-180	3.53086e-103	1.92594e-184
3	Eml1	3.49926e-90	0.37783	0.608	0.328	1.38648e-85	4.51369e-184	0.608889	0.551	0.144	1.78841e-179	3.49926e-90	9.02738e-184
3	Kif13a	1.5543e-151	0.459379	0.759	0.42	6.15843e-147	4.53128e-184	0.635593	0.651	0.21	1.79538e-179	1.5543e-151	9.06255e-184
3	Adam9	6.44346e-183	0.547023	0.934	0.704	2.55303e-178	8.4006e-139	0.669504	0.864	0.509	3.32849e-134	8.4006e-139	1.28869e-182
3	Npc1	3.22176e-120	0.373287	0.984	0.798	1.27653e-115	8.57075e-182	0.699926	0.962	0.602	3.3959e-177	3.22176e-120	1.71415e-181
3	Rdx	7.40639e-127	0.402764	0.973	0.8	2.93456e-122	1.74458e-181	0.774566	0.939	0.591	6.91237e-177	7.40639e-127	3.48916e-181
3	Kat2b	3.66733e-137	0.440302	0.947	0.649	1.45307e-132	2.75828e-181	0.762265	0.853	0.403	1.09289e-176	3.66733e-137	5.51656e-181
3	Xaf1	2.23663e-154	0.473542	0.934	0.691	8.86197e-150	6.10921e-181	0.746785	0.953	0.613	2.42059e-176	2.23663e-154	1.22184e-180
3	Tmem140	6.17382e-181	0.543783	0.814	0.422	2.44619e-176	3.3102e-169	0.785353	0.597	0.199	1.31157e-164	3.3102e-169	1.23476e-180
3	Exoc6b	4.07883e-131	0.441095	0.746	0.43	1.61611e-126	2.21738e-180	0.636825	0.647	0.212	8.78571e-176	4.07883e-131	4.43476e-180
3	Stxbp6	3.91159e-115	0.368875	0.772	0.416	1.54985e-110	5.34856e-180	0.525305	0.565	0.153	2.11921e-175	3.91159e-115	1.06971e-179
3	Pals1	6.27915e-109	0.376359	0.895	0.585	2.48793e-104	1.04319e-179	0.679233	0.749	0.278	4.13333e-175	6.27915e-109	2.08638e-179
3	Gclm	6.90962e-150	0.478458	0.834	0.506	2.73773e-145	1.52854e-179	0.667841	0.726	0.264	6.05638e-175	6.90962e-150	3.05708e-179
3	X1700047M11Rik	7.75378e-97	0.350351	0.645	0.354	3.0722e-92	1.746e-177	0.5455	0.554	0.152	6.918e-173	7.75378e-97	3.492e-177
3	Ado	3.52908e-119	0.385575	0.888	0.556	1.39829e-114	2.79337e-175	0.655886	0.744	0.276	1.10679e-170	3.52908e-119	5.58675e-175
3	Dcaf17	7.01338e-95	0.426974	0.798	0.518	2.77884e-90	4.43783e-175	0.790987	0.661	0.227	1.75836e-170	7.01338e-95	8.87566e-175
3	Tmed10	5.9724e-174	0.428443	0.998	0.886	2.36638e-169	6.39729e-159	0.65229	0.97	0.766	2.53473e-154	6.39729e-159	1.19448e-173
3	Srd5a1	5.0991e-101	0.344992	0.491	0.231	2.02037e-96	9.87464e-174	0.531061	0.46	0.11	3.91253e-169	5.0991e-101	1.97493e-173
3	Dock1	8.87873e-116	0.39224	0.763	0.456	3.51793e-111	3.45825e-173	0.632901	0.63	0.206	1.37023e-168	8.87873e-116	6.9165e-173
3	Gm38642	1.88552e-116	0.360084	0.674	0.351	7.4708e-112	4.54697e-173	0.481075	0.448	0.105	1.8016e-168	1.88552e-116	9.09395e-173
3	Stox2	6.76853e-139	0.441487	0.72	0.374	2.68183e-134	7.47228e-173	0.596589	0.589	0.175	2.96067e-168	6.76853e-139	1.49446e-172
3	Rnf141	8.89439e-118	0.386512	0.907	0.604	3.52414e-113	9.01817e-173	0.66572	0.778	0.321	3.57318e-168	8.89439e-118	1.80363e-172
3	Slc16a1	9.14953e-100	0.347136	0.676	0.381	3.62523e-95	1.13384e-171	0.615533	0.633	0.21	4.49249e-167	9.14953e-100	2.26768e-171
3	Nfix	4.25435e-120	0.361082	0.954	0.669	1.68566e-115	1.99832e-171	0.621458	0.89	0.424	7.91776e-167	4.25435e-120	3.99665e-171
3	B3galt5	7.42491e-93	0.314614	0.916	0.532	2.9419e-88	4.25228e-171	0.657228	0.729	0.25	1.68484e-166	7.42491e-93	8.50456e-171
3	Cdk19	7.23486e-120	0.408137	0.906	0.64	2.8666e-115	3.54996e-170	0.727282	0.87	0.444	1.40656e-165	7.23486e-120	7.09991e-170
3	Bicc1	1.08284e-124	0.377496	0.539	0.243	4.29042e-120	4.228e-170	0.410143	0.326	0.058	1.67522e-165	1.08284e-124	8.456e-170
3	Tmbim1	8.7055e-90	0.328904	0.859	0.598	3.44929e-85	2.12939e-169	0.663438	0.782	0.329	8.43706e-165	8.7055e-90	4.25877e-169
3	Tvp23a	9.03328e-97	0.338413	0.454	0.207	3.57917e-92	6.96815e-169	0.480794	0.422	0.095	2.76092e-164	9.03328e-97	1.39363e-168
3	Atp1b3	6.05183e-123	0.395233	0.998	0.927	2.39786e-118	1.33182e-168	0.688194	0.992	0.835	5.27692e-164	6.05183e-123	2.66363e-168
3	Hsp90aa1	1.44994e-168	0.459867	1	0.923	5.74494e-164	3.09382e-145	0.520033	0.997	0.836	1.22583e-140	3.09382e-145	2.89987e-168
3	Arnt2	8.59608e-102	0.34474	0.765	0.433	3.40594e-97	2.83697e-168	0.581624	0.627	0.194	1.12406e-163	8.59608e-102	5.67394e-168
3	Sgk1	2.90782e-168	0.547175	0.997	0.817	1.15214e-163	3.39766e-110	0.56704	0.975	0.683	1.34622e-105	3.39766e-110	5.81564e-168
3	Golga7	8.59165e-110	0.336121	0.987	0.839	3.40418e-105	3.7438e-168	0.672179	0.965	0.627	1.48337e-163	8.59165e-110	7.48759e-168
3	Wipi1	3.87598e-103	0.370367	0.748	0.437	1.53574e-98	2.18197e-167	0.604361	0.607	0.191	8.64541e-163	3.87598e-103	4.36394e-167
3	Unc5c	2.3183e-128	0.447883	0.618	0.299	9.18557e-124	1.25147e-166	0.543261	0.477	0.122	4.95858e-162	2.3183e-128	2.50294e-166
3	Mfsd6	2.4377e-83	0.322782	0.772	0.485	9.65865e-79	3.19975e-166	0.596818	0.653	0.22	1.26781e-161	2.4377e-83	6.39951e-166
3	Sirt2	2.79424e-110	0.360008	0.862	0.605	1.10714e-105	6.4602e-165	0.459855	0.958	0.611	2.55966e-160	2.79424e-110	1.29204e-164
3	Pak5	2.48881e-85	0.344928	0.523	0.273	9.86117e-81	1.38431e-164	0.514706	0.446	0.108	5.48492e-160	2.48881e-85	2.76862e-164
3	Plxnb3	3.98254e-87	0.309514	0.568	0.306	1.57796e-82	1.51204e-164	0.530796	0.614	0.19	5.99101e-160	3.98254e-87	3.02408e-164
3	Cnn3	8.03312e-90	0.314173	0.748	0.454	3.18288e-85	4.28629e-164	0.557291	0.696	0.237	1.69831e-159	8.03312e-90	8.57258e-164
3	Rab6a	1.26167e-86	0.30766	0.979	0.812	4.99899e-82	4.78736e-164	0.654192	0.975	0.659	1.89685e-159	1.26167e-86	9.57472e-164
3	Dscaml1	5.10991e-105	0.352586	0.667	0.361	2.02465e-100	9.22396e-163	0.570288	0.551	0.162	3.65472e-158	5.10991e-105	1.84479e-162
3	Ifi47	9.37249e-163	0.612527	0.801	0.455	3.71357e-158	1.45682e-72	0.622278	0.669	0.373	5.77222e-68	1.45682e-72	1.8745e-162
3	Map4k5	1.00087e-143	0.455336	0.898	0.572	3.96566e-139	8.30825e-162	0.631584	0.739	0.288	3.2919e-157	1.00087e-143	1.66165e-161
3	Bnip3l	2.57977e-122	0.401621	0.948	0.741	1.02216e-117	1.95279e-161	0.694913	0.887	0.481	7.73733e-157	2.57977e-122	3.90557e-161
3	X1500004A13Rik	1.77292e-93	0.347182	0.753	0.442	7.02466e-89	7.09817e-161	0.578157	0.617	0.197	2.81244e-156	1.77292e-93	1.41963e-160
3	Spock1	1.47817e-118	0.513631	0.65	0.33	5.85679e-114	1.49115e-160	0.747468	0.596	0.189	5.90824e-156	1.47817e-118	2.9823e-160
3	H2bc4	1.27956e-100	0.395567	0.92	0.69	5.06988e-96	3.13918e-160	0.652451	0.84	0.38	1.24381e-155	1.27956e-100	6.27837e-160
3	Tsc22d4	3.4507e-120	0.389097	0.951	0.676	1.36724e-115	3.51164e-160	0.707945	0.883	0.471	1.39138e-155	3.4507e-120	7.02327e-160
3	Pip4k2a	7.03712e-98	0.324351	0.997	0.841	2.78825e-93	1.0904e-159	0.674949	0.979	0.671	4.3204e-155	7.03712e-98	2.18081e-159
3	Tafa5	5.45933e-159	0.456	0.738	0.366	2.1631e-154	6.31969e-159	0.512838	0.525	0.15	2.50399e-154	6.31969e-159	1.09187e-158
3	H2-T23	8.32692e-159	0.489382	0.984	0.85	3.29929e-154	7.32087e-159	0.778578	0.98	0.84	2.90067e-154	8.32692e-159	1.46417e-158
3	Ppp2r2a	7.58487e-151	0.459517	0.952	0.715	3.00528e-146	3.24581e-158	0.690761	0.907	0.529	1.28606e-153	7.58487e-151	6.49162e-158
3	Reep5	2.58118e-145	0.413996	0.971	0.802	1.02272e-140	1.19689e-157	0.638251	0.949	0.623	4.74232e-153	2.58118e-145	2.39378e-157
3	Mtmr2	6.74301e-127	0.416363	0.855	0.536	2.67172e-122	6.52531e-157	0.656888	0.742	0.31	2.58546e-152	6.74301e-127	1.30506e-156
3	Pakap	1.13132e-112	0.375404	0.743	0.413	4.48254e-108	1.39026e-153	0.491119	0.524	0.149	5.50851e-149	1.13132e-112	2.78053e-153
3	Neat1	2.35059e-153	0.52371	0.993	0.935	9.31352e-149	5.21122e-120	0.737677	0.936	0.727	2.06479e-115	5.21122e-120	4.70119e-153
3	ENSMUSG00000120732	6.55654e-139	0.440065	0.909	0.599	2.59783e-134	5.10776e-153	0.701104	0.809	0.403	2.0238e-148	6.55654e-139	1.02155e-152
3	Nmral1	9.19077e-83	0.313963	0.629	0.367	3.64157e-78	1.80846e-152	0.60294	0.609	0.212	7.1655e-148	9.19077e-83	3.61693e-152
3	Lrrtm2	3.63705e-120	0.397464	0.541	0.239	1.44107e-115	5.85242e-152	0.451105	0.468	0.119	2.31885e-147	3.63705e-120	1.17048e-151
3	Snx30	1.1763e-129	0.44486	0.818	0.525	4.66075e-125	5.89764e-152	0.625761	0.768	0.331	2.33676e-147	1.1763e-129	1.17953e-151
3	Pde4b	6.41037e-152	0.468862	0.936	0.624	2.53992e-147	5.03275e-118	0.557905	0.846	0.457	1.99407e-113	5.03275e-118	1.28207e-151
3	Nfe2l3	2.27832e-87	0.320973	0.567	0.298	9.02716e-83	3.32013e-151	0.452311	0.38	0.086	1.3155e-146	2.27832e-87	6.64026e-151
3	Papss1	1.95637e-124	0.388139	0.908	0.632	7.75154e-120	3.0986e-149	0.628227	0.863	0.434	1.22773e-144	1.95637e-124	6.19719e-149
3	Tspyl4	1.83274e-106	0.348744	0.78	0.448	7.2617e-102	6.00981e-149	0.504302	0.664	0.226	2.38121e-144	1.83274e-106	1.20196e-148
3	ENSMUSG00000120522	1.93005e-85	0.312369	0.588	0.316	7.64723e-81	9.80095e-149	0.52554	0.518	0.15	3.88333e-144	1.93005e-85	1.96019e-148
3	Ankrd28	9.81317e-148	0.449988	0.804	0.446	3.88817e-143	3.9296e-119	0.494585	0.53	0.185	1.55698e-114	3.9296e-119	1.96263e-147
3	D16Ertd472e	1.77062e-108	0.379382	0.863	0.539	7.01553e-104	4.10353e-147	0.609704	0.801	0.357	1.6259e-142	1.77062e-108	8.20706e-147
3	Rtl8b	1.03274e-95	0.348491	0.849	0.556	4.09192e-91	5.04408e-147	0.609315	0.74	0.305	1.99857e-142	1.03274e-95	1.00882e-146
3	Ndst1	3.42054e-98	0.356837	0.901	0.606	1.35529e-93	6.85078e-146	0.626704	0.76	0.319	2.71441e-141	3.42054e-98	1.37016e-145
3	Ube2d1	2.80861e-113	0.384597	0.916	0.651	1.11283e-108	1.71059e-145	0.618259	0.818	0.405	6.77769e-141	2.80861e-113	3.42118e-145
3	Abhd17b	3.25011e-88	0.343272	0.84	0.582	1.28776e-83	2.16496e-144	0.578079	0.816	0.37	8.57799e-140	3.25011e-88	4.32991e-144
3	Ptpn11	6.19636e-144	0.43414	0.962	0.687	2.45512e-139	6.80782e-144	0.641286	0.838	0.425	2.6974e-139	6.80782e-144	1.23927e-143
3	Ktn1	1.63435e-110	0.359021	0.952	0.704	6.47563e-106	9.15581e-144	0.645483	0.863	0.443	3.62771e-139	1.63435e-110	1.83116e-143
3	Zfp281	4.71056e-143	0.473011	0.921	0.657	1.86642e-138	1.5752e-115	0.615927	0.77	0.416	6.24126e-111	1.5752e-115	9.42113e-143
3	Cldnd1	1.39379e-100	0.328169	0.972	0.779	5.52248e-96	1.6152e-141	0.608982	0.949	0.636	6.39976e-137	1.39379e-100	3.23041e-141
3	Cavin3	2.53828e-91	0.333341	0.55	0.281	1.00572e-86	8.56238e-141	0.452946	0.419	0.107	3.39258e-136	2.53828e-91	1.71248e-140
3	Pik3c2b	1.66833e-82	0.313925	0.63	0.361	6.61026e-78	9.56468e-141	0.530236	0.542	0.173	3.78972e-136	1.66833e-82	1.91294e-140
3	Sptbn1	2.8027e-93	0.322456	0.916	0.662	1.11048e-88	1.03102e-140	0.607976	0.845	0.415	4.08511e-136	2.8027e-93	2.06204e-140
3	Slc6a8	3.59275e-102	0.359859	0.711	0.401	1.42352e-97	1.10551e-140	0.522081	0.518	0.161	4.38024e-136	3.59275e-102	2.21102e-140
3	Adssl1	3.15545e-77	0.31457	0.641	0.384	1.25025e-72	2.21429e-140	0.519215	0.538	0.173	8.77345e-136	3.15545e-77	4.42858e-140
3	Tex2	1.19959e-89	0.327661	0.728	0.458	4.75302e-85	9.12359e-139	0.557373	0.647	0.251	3.61495e-134	1.19959e-89	1.82472e-138
3	Cd81	9.37958e-139	0.363497	0.998	0.871	3.71638e-134	8.20632e-50	0.323474	0.999	0.711	3.25151e-45	8.20632e-50	1.87592e-138
3	Nfia	3.01938e-119	0.418627	0.848	0.53	1.19634e-114	1.95482e-138	0.630488	0.734	0.322	7.74539e-134	3.01938e-119	3.90964e-138
3	Snx10	3.1863e-138	0.46052	0.944	0.753	1.26247e-133	2.74729e-103	0.61341	0.867	0.598	1.08853e-98	2.74729e-103	6.37259e-138
3	Zfp706	5.57505e-116	0.374367	0.973	0.806	2.20895e-111	1.36753e-137	0.611279	0.928	0.614	5.41841e-133	5.57505e-116	2.73505e-137
3	Gbp3	1.73288e-137	0.446993	0.793	0.462	6.86603e-133	2.5015e-106	0.606661	0.701	0.345	9.91144e-102	2.5015e-106	3.46577e-137
3	Ifit1	2.69281e-128	0.39943	0.838	0.481	1.06694e-123	5.95086e-137	0.678232	0.757	0.325	2.35785e-132	2.69281e-128	1.19017e-136
3	Myo18a	8.59166e-137	0.449151	0.794	0.492	3.40419e-132	7.97042e-101	0.497991	0.695	0.348	3.15804e-96	7.97042e-101	1.71833e-136
3	Ss18l2	2.73708e-124	0.460593	0.794	0.495	1.08449e-119	1.93581e-135	0.610144	0.644	0.25	7.67008e-131	2.73708e-124	3.87163e-135
3	Ralgps1	1.57177e-103	0.378917	0.654	0.362	6.22767e-99	4.07572e-135	0.521048	0.537	0.178	1.61488e-130	1.57177e-103	8.15144e-135
3	Parp3	9.02562e-113	0.426712	0.643	0.35	3.57613e-108	1.88795e-134	0.532977	0.507	0.162	7.48045e-130	9.02562e-113	3.77591e-134
3	Fam13c	1.01867e-133	0.458031	0.624	0.298	4.03618e-129	6.19166e-74	0.337029	0.357	0.121	2.45326e-69	6.19166e-74	2.03735e-133
3	Lpgat1	1.99342e-133	0.446753	0.944	0.727	7.89834e-129	1.13688e-116	0.60523	0.84	0.48	4.50456e-112	1.13688e-116	3.98685e-133
3	Pik3r1	2.40398e-133	0.399021	0.979	0.81	9.52506e-129	8.22868e-74	0.418537	0.901	0.646	3.26037e-69	8.22868e-74	4.80797e-133
3	Pcdh17	5.3353e-133	0.446321	0.552	0.241	2.11395e-128	1.42269e-122	0.446764	0.434	0.123	5.637e-118	1.42269e-122	1.06706e-132
3	Kcnq3	1.26331e-85	0.33522	0.648	0.357	5.00548e-81	8.43275e-132	0.556194	0.497	0.153	3.34122e-127	1.26331e-85	1.68655e-131
3	Serinc1	3.9605e-108	0.325082	0.992	0.878	1.56923e-103	1.89239e-131	0.565318	0.958	0.697	7.49803e-127	3.9605e-108	3.78478e-131
3	Rnf144a	2.68536e-104	0.368184	0.67	0.36	1.06399e-99	2.55192e-131	0.460677	0.494	0.148	1.01112e-126	2.68536e-104	5.10383e-131
3	Pithd1	3.47815e-83	0.308435	0.724	0.451	1.37811e-78	5.90147e-130	0.531215	0.61	0.232	2.33828e-125	3.47815e-83	1.18029e-129
3	Rhoj	5.21987e-82	0.336206	0.538	0.279	2.06822e-77	6.0058e-130	0.42414	0.338	0.077	2.37962e-125	5.21987e-82	1.20116e-129
3	Oasl2	9.92034e-130	0.448063	0.972	0.764	3.93064e-125	5.72893e-115	0.624615	0.951	0.683	2.26992e-110	5.72893e-115	1.98407e-129
3	Rtl8a	1.22902e-81	0.316586	0.889	0.615	4.86963e-77	2.92468e-129	0.587651	0.791	0.373	1.15882e-124	1.22902e-81	5.84936e-129
3	Taldo1	1.30312e-101	0.357587	0.924	0.711	5.16323e-97	3.84616e-129	0.62236	0.895	0.57	1.52393e-124	1.30312e-101	7.69233e-129
3	Slc22a17	3.13356e-125	0.405638	0.831	0.521	1.24158e-120	3.79635e-128	0.465629	0.753	0.316	1.50419e-123	3.13356e-125	7.59271e-128
3	Pafah1b1	5.97969e-128	0.357416	0.992	0.892	2.36927e-123	4.23442e-126	0.548645	0.968	0.774	1.67776e-121	4.23442e-126	1.19594e-127
3	Tom1l2	6.20558e-81	0.311535	0.682	0.413	2.45878e-76	1.69876e-127	0.499061	0.588	0.212	6.73084e-123	6.20558e-81	3.39753e-127
3	Gpr155	3.66982e-127	0.425545	0.816	0.515	1.45406e-122	9.14394e-123	0.60007	0.71	0.336	3.62301e-118	9.14394e-123	7.33965e-127
3	Lrrc4b	1.8709e-102	0.36369	0.674	0.377	7.41287e-98	4.37323e-127	0.478416	0.561	0.186	1.73276e-122	1.8709e-102	8.74646e-127
3	F830016B08Rik	6.01632e-127	0.405786	0.573	0.26	2.38379e-122	6.43199e-120	0.500063	0.391	0.108	2.54848e-115	6.43199e-120	1.20326e-126
3	Txndc16	1.54914e-111	0.377847	0.853	0.575	6.13802e-107	2.02065e-126	0.588153	0.737	0.344	8.00621e-122	1.54914e-111	4.04129e-126
3	Mboat2	4.00139e-115	0.370992	0.568	0.275	1.58543e-110	3.66688e-125	0.460445	0.446	0.131	1.45289e-120	4.00139e-115	7.33377e-125
3	Fbxo7	2.08924e-112	0.382563	0.75	0.461	8.278e-108	2.49602e-123	0.581975	0.681	0.302	9.88973e-119	2.08924e-112	4.99204e-123
3	Tmem9b	2.50659e-95	0.335454	0.896	0.672	9.93161e-91	1.06188e-122	0.575418	0.886	0.53	4.2074e-118	2.50659e-95	2.12377e-122
3	Gm48678	8.05208e-52	0.445763	0.185	0.065	3.1904e-47	1.0676e-122	0.597729	0.27	0.052	4.23004e-118	8.05208e-52	2.1352e-122
3	Erbb4	1.45949e-122	0.40185	0.486	0.203	5.78279e-118	1.47622e-122	0.433485	0.391	0.104	5.8491e-118	1.47622e-122	2.91898e-122
3	Fktn	1.68347e-86	0.344508	0.707	0.435	6.67024e-82	4.2445e-122	0.543184	0.585	0.222	1.68175e-117	1.68347e-86	8.48899e-122
3	Gng12	4.46048e-82	0.318352	0.954	0.783	1.76733e-77	2.61991e-121	0.573267	0.901	0.565	1.03806e-116	4.46048e-82	5.23982e-121
3	Clcn3	1.6947e-89	0.334253	0.876	0.605	6.71474e-85	5.1478e-121	0.565111	0.767	0.37	2.03966e-116	1.6947e-89	1.02956e-120
3	Ccdc88a	7.91938e-77	0.317496	0.926	0.709	3.13782e-72	1.47144e-120	0.584306	0.869	0.487	5.83015e-116	7.91938e-77	2.94289e-120
3	Rhob	6.4206e-111	0.342385	1	0.889	2.54397e-106	1.7379e-120	0.468295	1	0.812	6.8859e-116	6.4206e-111	3.4758e-120
3	Pls3	6.2172e-79	0.309343	0.604	0.347	2.46338e-74	3.02678e-120	0.482022	0.479	0.155	1.19927e-115	6.2172e-79	6.05357e-120
3	Mt1	1.89763e-119	0.39817	0.984	0.838	7.51878e-115	3.21111e-116	0.623341	0.9	0.585	1.27231e-111	3.21111e-116	3.79525e-119
3	Selenom	8.34823e-111	0.376436	0.562	0.282	3.30774e-106	3.43548e-119	0.407711	0.379	0.102	1.36121e-114	8.34823e-111	6.87097e-119
3	Creb5	1.04862e-89	0.370299	0.788	0.515	4.15485e-85	5.48671e-119	0.533461	0.654	0.262	2.17394e-114	1.04862e-89	1.09734e-118
3	Snx15	4.2471e-71	0.301432	0.689	0.454	1.68279e-66	9.66076e-119	0.526969	0.614	0.25	3.82779e-114	4.2471e-71	1.93215e-118
3	Katnal1	3.7385e-104	0.368411	0.628	0.343	1.48127e-99	1.0347e-118	0.459194	0.487	0.16	4.09969e-114	3.7385e-104	2.0694e-118
3	Acsl3	4.03925e-90	0.340531	0.6	0.328	1.60043e-85	5.66579e-118	0.453876	0.458	0.141	2.2449e-113	4.03925e-90	1.13316e-117
3	Elapor2	2.62928e-77	0.316462	0.508	0.269	1.04177e-72	2.43225e-117	0.419549	0.374	0.101	9.63706e-113	2.62928e-77	4.8645e-117
3	Snap91	3.39967e-117	0.327174	0.472	0.193	1.34702e-112	2.13186e-83	0.312594	0.312	0.091	8.44685e-79	2.13186e-83	6.79933e-117
3	Kif13b	2.59295e-87	0.359316	0.822	0.574	1.02738e-82	1.55272e-115	0.582096	0.686	0.32	6.15218e-111	2.59295e-87	3.10543e-115
3	Pcdh10	2.51432e-75	0.304139	0.487	0.253	9.96222e-71	7.01522e-115	0.390587	0.421	0.122	2.77957e-110	2.51432e-75	1.40304e-114
3	Tmem30a	1.08705e-114	0.343651	0.976	0.865	4.30712e-110	1.22703e-108	0.536471	0.928	0.695	4.86173e-104	1.22703e-108	2.17411e-114
3	Dusp7	6.31142e-108	0.392306	0.753	0.477	2.50071e-103	3.0994e-114	0.535337	0.638	0.275	1.22804e-109	6.31142e-108	6.1988e-114
3	Tcf4	9.29287e-109	0.346797	0.984	0.835	3.68202e-104	5.43309e-114	0.518749	0.965	0.705	2.1527e-109	9.29287e-109	1.08662e-113
3	Arrdc3	1.63307e-103	0.382702	0.919	0.627	6.47055e-99	6.52843e-114	0.557056	0.78	0.386	2.5867e-109	1.63307e-103	1.30569e-113
3	Marchf8	1.12391e-84	0.315339	0.826	0.553	4.45317e-80	3.39666e-113	0.48597	0.671	0.29	1.34582e-108	1.12391e-84	6.79331e-113
3	Polr3e	4.77904e-91	0.369748	0.68	0.402	1.89355e-86	6.44675e-113	0.470663	0.487	0.165	2.55433e-108	4.77904e-91	1.28935e-112
3	Zdhhc9	1.04695e-78	0.314789	0.605	0.363	4.14822e-74	1.59039e-112	0.525723	0.551	0.213	6.30146e-108	1.04695e-78	3.18079e-112
3	Arhgef12	4.67159e-84	0.339509	0.754	0.487	1.85098e-79	2.28806e-111	0.507976	0.607	0.252	9.06573e-107	4.67159e-84	4.57611e-111
3	Cdkl5	1.11099e-79	0.324456	0.594	0.331	4.40195e-75	5.29779e-111	0.454383	0.438	0.136	2.09909e-106	1.11099e-79	1.05956e-110
3	Git1	4.94959e-85	0.333544	0.698	0.431	1.96113e-80	6.60396e-111	0.469238	0.506	0.182	2.61662e-106	4.94959e-85	1.32079e-110
3	Entpd5	6.81924e-73	0.304826	0.609	0.364	2.70192e-68	4.24874e-110	0.478096	0.516	0.187	1.68344e-105	6.81924e-73	8.49749e-110
3	Bin1	7.52695e-110	0.382259	0.913	0.675	2.98233e-105	4.33224e-104	0.548981	0.826	0.482	1.71652e-99	4.33224e-104	1.50539e-109
3	Smad7	1.35424e-109	0.412665	0.893	0.637	5.36578e-105	5.37481e-69	0.416112	0.811	0.522	2.12961e-64	5.37481e-69	2.70849e-109
3	Strn	1.19752e-78	0.348592	0.776	0.539	4.7448e-74	1.9094e-109	0.544317	0.672	0.301	7.56541e-105	1.19752e-78	3.81879e-109
3	Glrb	8.51788e-94	0.32696	0.7	0.398	3.37495e-89	2.64306e-109	0.456087	0.534	0.188	1.04723e-104	8.51788e-94	5.28612e-109
3	Tshz1	1.10578e-108	0.388024	0.712	0.414	4.38132e-104	1.59279e-100	0.480021	0.544	0.218	6.31095e-96	1.59279e-100	2.21156e-108
3	Nudt4	1.40096e-76	0.329105	0.719	0.477	5.55088e-72	1.22857e-108	0.570766	0.696	0.336	4.86783e-104	1.40096e-76	2.45714e-108
3	Slc6a1	5.62739e-99	0.346896	0.658	0.363	2.22969e-94	1.53269e-108	0.407029	0.462	0.149	6.07282e-104	5.62739e-99	3.06538e-108
3	Oxr1	3.76008e-104	0.394832	0.885	0.653	1.48982e-99	1.78145e-108	0.5431	0.733	0.365	7.05846e-104	3.76008e-104	3.5629e-108
3	Man1a	2.99474e-107	0.480578	0.74	0.486	1.18658e-102	4.75528e-96	0.571395	0.679	0.354	1.88414e-91	4.75528e-96	5.98949e-107
3	Pcbp4	4.74027e-84	0.305123	0.534	0.284	1.87819e-79	4.46406e-107	0.397696	0.371	0.107	1.76875e-102	4.74027e-84	8.92812e-107
3	Ckap5	3.1282e-81	0.332708	0.848	0.607	1.23946e-76	1.35802e-106	0.528961	0.715	0.352	5.38076e-102	3.1282e-81	2.71605e-106
3	Cmpk2	1.36006e-106	0.325849	0.637	0.323	5.38881e-102	6.86069e-106	0.462048	0.506	0.179	2.71834e-101	6.86069e-106	2.72011e-106
3	Sh3d19	2.90083e-106	0.372512	0.631	0.338	1.14937e-101	7.49725e-89	0.380552	0.422	0.146	2.97056e-84	7.49725e-89	5.80166e-106
3	Cadm2	6.60685e-106	0.3829	0.673	0.362	2.61777e-101	1.7753e-102	0.343895	0.528	0.186	7.03411e-98	1.7753e-102	1.32137e-105
3	Lbh	1.0625e-105	0.387499	0.938	0.67	4.20984e-101	2.72063e-103	0.516047	0.815	0.443	1.07797e-98	2.72063e-103	2.125e-105
3	Ppm1l	1.16656e-105	0.373486	0.638	0.336	4.62213e-101	4.46751e-105	0.450751	0.47	0.16	1.77012e-100	4.46751e-105	2.33311e-105
3	Zdhhc17	5.81498e-82	0.342744	0.741	0.488	2.30401e-77	4.64467e-105	0.508501	0.624	0.269	1.84031e-100	5.81498e-82	9.28935e-105
3	Gpd1	1.54863e-83	0.341196	0.484	0.242	6.136e-79	2.53613e-104	0.396279	0.366	0.103	1.00486e-99	1.54863e-83	5.07226e-104
3	Rassf2	8.88526e-101	0.352403	0.962	0.794	3.52052e-96	1.24987e-91	0.485456	0.887	0.604	4.95222e-87	1.24987e-91	1.77705e-100
3	Cacnb4	2.79501e-92	0.365118	0.449	0.203	1.10744e-87	2.2729e-100	0.408101	0.349	0.098	9.0057e-96	2.79501e-92	4.54581e-100
3	Setd7	9.39005e-98	0.379296	0.823	0.569	3.72053e-93	2.06825e-84	0.453626	0.613	0.291	8.19483e-80	2.06825e-84	1.87801e-97
3	Ifit3	5.29251e-97	0.382153	0.81	0.522	2.097e-92	8.76989e-94	0.634895	0.815	0.478	3.47481e-89	8.76989e-94	1.0585e-96
3	St6gal1	1.30232e-79	0.311859	0.777	0.519	5.16004e-75	2.70345e-93	0.46233	0.614	0.277	1.07116e-88	1.30232e-79	5.40689e-93
3	Ppfibp2	1.05538e-88	0.349751	0.675	0.408	4.18165e-84	5.17594e-92	0.422443	0.483	0.182	2.05081e-87	1.05538e-88	1.03519e-91
3	Rab2a	3.34907e-82	0.305084	0.932	0.756	1.32697e-77	5.49306e-91	0.460158	0.842	0.532	2.17646e-86	3.34907e-82	1.09861e-90
3	Ro60	6.00056e-77	0.33389	0.731	0.485	2.37754e-72	1.87807e-90	0.460183	0.606	0.27	7.4413e-86	6.00056e-77	3.75615e-90
3	Dst	5.1414e-90	0.36246	0.925	0.719	2.03712e-85	5.53332e-87	0.521511	0.832	0.529	2.19241e-82	5.53332e-87	1.02828e-89
3	Tjp1	1.09878e-89	0.333262	0.775	0.498	4.35359e-85	1.99412e-73	0.417216	0.593	0.298	7.90109e-69	1.99412e-73	2.19756e-89
3	Epb41l1	3.84092e-71	0.302743	0.655	0.408	1.52185e-66	2.65522e-88	0.407148	0.511	0.199	1.05205e-83	3.84092e-71	5.31044e-88
3	Prag1	1.59708e-83	0.316265	0.502	0.265	6.32796e-79	6.38084e-50	0.332603	0.387	0.177	2.52822e-45	6.38084e-50	3.19417e-83
3	Garre1	9.85619e-81	0.308953	0.778	0.522	3.90522e-76	2.69153e-82	0.457545	0.654	0.342	1.06644e-77	9.85619e-81	5.38307e-82
3	Plpbp	7.22637e-82	0.337961	0.719	0.472	2.86323e-77	3.52559e-66	0.388542	0.588	0.307	1.39691e-61	3.52559e-66	1.44527e-81
3	Spns2	2.12711e-81	0.325278	0.588	0.34	8.42804e-77	2.3296e-61	0.351712	0.439	0.197	9.23035e-57	2.3296e-61	4.25422e-81
3	Hipk2	1.37288e-79	0.321832	0.744	0.498	5.43963e-75	8.93425e-71	0.40245	0.556	0.272	3.53993e-66	8.93425e-71	2.74576e-79
3	Zeb2	4.92556e-77	0.305502	0.972	0.824	1.95161e-72	1.76481e-57	0.380097	0.905	0.702	6.99252e-53	1.76481e-57	9.85113e-77
3	Cd274	8.76913e-75	0.34162	0.848	0.61	3.4745e-70	5.63913e-76	0.539644	0.806	0.5	2.23433e-71	8.76913e-75	1.12783e-75
3	Psmb8	1.49142e-75	0.310171	0.945	0.78	5.9093e-71	7.72654e-44	0.325111	0.894	0.708	3.06141e-39	7.72654e-44	2.98284e-75
3	Hspa4l	1.58705e-73	0.341719	0.757	0.514	6.28822e-69	1.7007e-66	0.416919	0.508	0.233	6.7385e-62	1.7007e-66	3.17411e-73
3	Macir	1.72597e-69	0.310033	0.761	0.535	6.83865e-65	5.09804e-66	0.409202	0.551	0.272	2.01995e-61	5.09804e-66	3.45195e-69
3	Tma16	1.74539e-62	0.307642	0.495	0.273	6.9156e-58	5.44627e-68	0.311133	0.268	0.081	2.15792e-63	1.74539e-62	1.08925e-67
4	Il1a	0	2.23388	0.957	0.188	0	0	2.34544	0.992	0.291	0	0	0
4	Siglech	0	1.64046	0.893	0.111	0	0	1.37238	0.983	0.262	0	0	0
4	Serpine2	0	1.54636	0.93	0.169	0	0	1.04354	0.964	0.322	0	0	0
4	Gpr34	0	1.50386	0.916	0.131	0	0	1.17994	0.876	0.211	0	0	0
4	Ptgs1	0	1.48854	0.951	0.183	0	0	1.09808	0.967	0.274	0	0	0
4	Lag3	0	1.43086	0.965	0.18	0	0	1.0321	0.888	0.244	0	0	0
4	Gm2629	0	1.18574	0.875	0.128	0	0	0.766505	0.729	0.203	0	0	0
4	Cfh	2.66053e-306	1.16101	0.893	0.147	1.05416e-301	0	1.06983	0.88	0.206	0	2.66053e-306	0
4	Slco2b1	5.34581e-304	1.22532	0.855	0.138	2.11812e-299	0	1.07567	0.945	0.241	0	5.34581e-304	0
4	Golm1	1.06258e-282	1.30184	0.922	0.188	4.21015e-278	0	1.01624	0.919	0.281	0	1.06258e-282	0
4	P2ry12	5.70935e-275	1.92111	0.983	0.265	2.26216e-270	0	1.52021	0.994	0.332	0	5.70935e-275	0
4	Sall3	6.92387e-275	0.818857	0.591	0.066	2.74338e-270	0	0.699002	0.532	0.143	0	6.92387e-275	0
4	Adora3	1.70981e-274	0.819364	0.638	0.077	6.77461e-270	0	0.616195	0.586	0.161	0	1.70981e-274	0
4	Pde3b	1.75765e-259	1.3447	0.928	0.212	6.96418e-255	0	1.05454	0.932	0.317	0	1.75765e-259	0
4	St3gal6	2.74895e-254	0.953229	0.762	0.126	1.08919e-249	0	0.910411	0.82	0.223	0	2.74895e-254	0
4	P2ry13	3.81739e-247	1.34154	0.957	0.233	1.51253e-242	0	1.0638	0.955	0.319	0	3.81739e-247	0
4	Olfml3	4.91996e-245	1.28863	0.919	0.217	1.94939e-240	0	1.33264	0.999	0.47	0	4.91996e-245	0
4	Ccl4	1.11086e-244	2.3062	0.925	0.262	4.40147e-240	0	1.77489	0.979	0.456	0	1.11086e-244	0
4	Cx3cr1	3.19637e-242	1.85255	0.997	0.338	1.26647e-237	0	1.3196	1	0.488	0	3.19637e-242	0
4	Ccl3	1.90553e-239	2.15978	0.936	0.263	7.5501e-235	0	1.56352	0.919	0.358	0	1.90553e-239	0
4	Fcrls	4.22809e-239	1.27211	0.8	0.149	1.67525e-234	0	1.41421	0.874	0.243	0	4.22809e-239	0
4	E230029C05Rik	5.75524e-233	1.10258	0.768	0.143	2.28034e-228	0	0.766181	0.734	0.248	0	5.75524e-233	0
4	Cd34	3.38309e-232	0.910852	0.67	0.105	1.34045e-227	0	0.990557	0.811	0.2	0	3.38309e-232	0
4	Abca9	4.34639e-232	0.999285	0.791	0.147	1.72213e-227	0	0.758679	0.637	0.137	0	4.34639e-232	0
4	Asph	1.50482e-229	1.04593	0.838	0.179	5.9624e-225	0	0.830308	0.817	0.277	0	1.50482e-229	0
4	Tmem119	3.26868e-226	1.05775	0.733	0.13	1.29512e-221	0	0.721688	0.773	0.229	0	3.26868e-226	0
4	Lrrc3	9.82301e-226	0.639411	0.513	0.06	3.89207e-221	0	0.767662	0.72	0.169	0	9.82301e-226	0
4	Nlrp3	1.18762e-224	1.28211	0.803	0.172	4.70559e-220	0	1.71152	0.945	0.371	0	1.18762e-224	0
4	Vsir	2.41698e-222	1.33738	0.971	0.29	9.57655e-218	0	1.01943	0.979	0.44	0	2.41698e-222	0
4	Kctd12	9.48769e-221	1.90058	0.986	0.354	3.75921e-216	0	1.73059	0.998	0.509	0	9.48769e-221	0
4	Mef2c	1.07767e-220	1.14025	0.887	0.208	4.26992e-216	0	0.921576	0.903	0.312	0	1.07767e-220	0
4	Cd83	1.90645e-219	1.71114	0.994	0.371	7.55373e-215	0	1.53483	1	0.576	0	1.90645e-219	0
4	Itgam	3.63145e-215	1.44482	0.974	0.304	1.43885e-210	0	1.19292	0.992	0.449	0	3.63145e-215	0
4	Lair1	3.21956e-214	1.33587	0.983	0.301	1.27565e-209	0	0.830181	0.98	0.462	0	3.21956e-214	0
4	Cd33	1.46125e-213	1.29425	0.98	0.288	5.78977e-209	0	1.04309	0.974	0.39	0	1.46125e-213	0
4	Mertk	2.41591e-209	1.1287	0.945	0.253	9.57233e-205	0	0.872834	0.931	0.354	0	2.41591e-209	0
4	Cd180	1.00312e-206	1.40104	0.962	0.285	3.97455e-202	0	0.774349	0.975	0.487	0	1.00312e-206	0
4	Csf1r	1.05975e-205	1.52471	0.997	0.395	4.19895e-201	0	1.20194	1	0.581	0	1.05975e-205	0
4	Hpgds	1.27508e-203	1.07291	0.922	0.243	5.05213e-199	0	0.826003	0.881	0.35	0	1.27508e-203	0
4	Cd14	2.23794e-201	1.46035	0.884	0.236	8.86715e-197	0	1.31613	0.961	0.407	0	2.23794e-201	0
4	Btg2	9.74132e-199	1.64783	0.991	0.392	3.8597e-194	0	0.829673	0.991	0.645	0	9.74132e-199	0
4	Trem2	1.23257e-198	1.44899	1	0.374	4.88368e-194	0	0.982326	0.994	0.5	0	1.23257e-198	0
4	Sirpa	1.87727e-195	1.25144	0.974	0.324	7.43813e-191	0	0.884132	0.981	0.474	0	1.87727e-195	0
4	Itgb5	1.85576e-194	1.02829	0.904	0.256	7.35291e-190	0	0.748754	0.891	0.375	0	1.85576e-194	0
4	Tgfbr2	2.11986e-193	1.16673	0.986	0.332	8.3993e-189	0	0.756005	0.951	0.47	0	2.11986e-193	0
4	Mylip	2.77876e-193	1.21115	0.896	0.263	1.101e-188	0	0.721513	0.809	0.338	0	2.77876e-193	0
4	Kcnk6	7.59966e-193	0.955578	0.826	0.196	3.01114e-188	0	0.700662	0.775	0.26	0	7.59966e-193	0
4	Gpr84	2.14234e-192	0.804427	0.47	0.059	8.4884e-188	0	1.52694	0.793	0.157	0	2.14234e-192	0
4	F11r	1.44952e-191	1.0706	0.936	0.269	5.74327e-187	0	0.728144	0.94	0.442	0	1.44952e-191	0
4	Hexb	1.06765e-188	1.82013	1	0.619	4.23026e-184	0	1.22917	1	0.705	0	1.06765e-188	0
4	Nfkbiz	3.34053e-187	1.44342	0.887	0.276	1.32358e-182	0	1.69302	0.96	0.421	0	3.34053e-187	0
4	Slc2a5	3.74816e-184	0.507129	0.267	0.018	1.4851e-179	0	0.695998	0.486	0.079	0	3.74816e-184	0
4	Fcgr3	5.38689e-184	1.24924	0.986	0.335	2.13439e-179	0	0.957979	0.99	0.481	0	5.38689e-184	0
4	Plek	1.05701e-183	1.33583	0.988	0.395	4.18807e-179	0	1.0554	0.995	0.58	0	1.05701e-183	0
4	Ly86	2.07588e-181	1.51397	0.997	0.478	8.22506e-177	0	1.01291	1	0.658	0	2.07588e-181	0
4	Lpcat2	1.1668e-172	1.14056	0.968	0.364	4.62309e-168	0	0.879872	0.986	0.495	0	1.1668e-172	0
4	Tnfaip3	3.05592e-172	1.28309	0.899	0.293	1.21082e-167	0	1.03571	0.938	0.438	0	3.05592e-172	0
4	Npnt	1.12108e-170	0.689334	0.504	0.075	4.44194e-166	0	0.649462	0.615	0.169	0	1.12108e-170	0
4	C1qa	2.57303e-168	1.16666	0.991	0.365	1.01949e-163	0	0.836894	0.987	0.478	0	2.57303e-168	0
4	Sall1	5.27469e-168	1.20454	0.913	0.362	2.08994e-163	0	0.787978	0.862	0.32	0	5.27469e-168	0
4	Pag1	7.53558e-168	0.952552	0.786	0.213	2.98575e-163	0	0.697873	0.75	0.254	0	7.53558e-168	0
4	Marcks	1.70062e-167	1.27565	1	0.472	6.73818e-163	0	0.868934	1	0.686	0	1.70062e-167	0
4	Laptm5	6.25713e-166	1.18317	1	0.446	2.4792e-161	0	0.805107	0.999	0.668	0	6.25713e-166	0
4	Ctsl	3.56363e-165	1.27774	0.98	0.567	1.41198e-160	0	1.15155	0.978	0.556	0	3.56363e-165	0
4	Bin2	2.11027e-163	0.964546	0.872	0.262	8.36132e-159	0	0.721896	0.885	0.404	0	2.11027e-163	0
4	Tgfbr1	3.86213e-163	1.18141	0.988	0.442	1.53025e-158	0	0.77273	0.979	0.56	0	3.86213e-163	0
4	Ltc4s	1.70678e-161	0.598565	0.449	0.063	6.76261e-157	0	0.675058	0.576	0.122	0	1.70678e-161	0
4	Pdgfb	1.96329e-161	0.749964	0.545	0.095	7.77895e-157	0	0.91336	0.614	0.165	0	1.96329e-161	0
4	Anxa3	1.21306e-159	0.913262	0.864	0.255	4.80639e-155	0	0.729144	0.874	0.34	0	1.21306e-159	0
4	Siglecf	4.75107e-159	0.595612	0.362	0.041	1.88247e-154	0	0.607592	0.497	0.118	0	4.75107e-159	0
4	Apbb1ip	5.7552e-159	1.0629	0.939	0.365	2.28032e-154	0	0.716771	0.927	0.501	0	5.7552e-159	0
4	Csf3r	1.29004e-158	0.760503	0.742	0.18	5.11141e-154	0	0.753105	0.9	0.371	0	1.29004e-158	0
4	Lgmn	5.34902e-155	1.14557	0.997	0.668	2.11939e-150	0	0.822913	0.997	0.705	0	5.34902e-155	0
4	Epb41l2	6.36889e-154	1.07941	0.988	0.666	2.52348e-149	0	0.768179	0.992	0.676	0	6.36889e-154	0
4	Il6ra	2.272e-153	0.948835	0.884	0.269	9.00213e-149	0	0.729982	0.891	0.408	0	2.272e-153	0
4	Zfhx3	9.82526e-153	1.02132	0.82	0.257	3.89297e-148	0	0.78735	0.823	0.307	0	9.82526e-153	0
4	C5ar1	2.3441e-151	0.906824	0.667	0.152	9.28781e-147	0	1.16945	0.823	0.253	0	2.3441e-151	0
4	C1qc	2.96569e-151	1.31607	1	0.551	1.17507e-146	0	0.942706	1	0.612	0	2.96569e-151	0
[truncated: 15,596 more rows]

## Sheet: Supplemental_Table_S10_2
Gene name
A830018L16Rik
Aagab
Abcg4
Abhd6
Abi1
Ablim3
Aco2
Acot13
Actr3b
Acvr1
Acvr1b
Acvr1c
Adcy2
Adgrb3
Agap3
Agfg2
Agtpbp1
Ak1
Ak5
Akap7
Ankmy2
Ankrd34a
Ankrd45
Ano3
Ap2a2
Ap2b1
Apbb1
Ar
Arf1
Arhgef4
Arl1
Arl8b
Armc1
Armc8
Arxes1
Asns
Atp1a1
Atp2b3
Atp2c1
Atp5pb
Atp6v0e2
Atp6v1a
Atp6v1c1
Atp6v1e1
Atrnl1
Atxn7l3
B230303A05Rik
B230334C09Rik
Bag6
Banp
Bdnf
Begain
Bicral
Blmh
Bop1
Brwd1
Btbd9
C030017B01Rik
C1ql2
C2cd2l
Cabp7
Cacna1h
Cacnb1
Cacng3
Calb1
Caln1
Camk2a
Camk2g
Camkk1
Camkk2
Camkv
Camsap1
Camta2
Cap2
Car12
Casd1
Ccdc106
Ccdc112
Ccdc32
Ccdc43
Ccdc47
Ccdc71l
Ccsap
Cdc40
Cdh8
Cdh9
Cdk5r2
Cdkl2
Cdr1os
Celf1
Cemip
Cep19
Chchd4
Chn1
Chpf
Chrm1
Chst15
Cisd1
Ckmt1
Clmp
Cluh
Cmas
Cnih3
Cnnm1
Cntnap1
Cntnap5a
Coa3
Cog7
Cops8
Cox5b
Cpeb4
Cplx1
Cpne4
Cpne6
Cracdl
Crtac1
Crtc1
Cry2
Crym
Cryzl1
Csnk1d
Csrnp3
Cttnbp2
Cul5
Cyc1
Cygb
Cyp46a1
Cyp7b1
Dagla
Dcaf6
Dctn2
Dcun1d4
Ddn
Dexi
Dgkb
Dgkd
Dgke
Dgkg
Dgkz
Dhx33
Dip2c
Dlgap2
Dlgap4
Dmwd
Dnajb14
Dnajb5
Doc2b
Dock3
Dph6
Drd5
Drg1
Drosha
Dsp
Dtd1
Efna3
Egln1
Eif4e
Eif4g3
Elk1
Elp3
Emc4
ENSMUSG00000120390
ENSMUSG00000121184
Ephx4
Ezh1
Fam110b
Fam131a
Fam135b
Fam163b
Fam168b
Fam216a
Fam220a
Fam234b
Fam241b
Fam81a
Fbxo25
Fbxo31
Fbxo34
Fbxo41
Fbxo45
Fbxw11
Fgf13
Fh1
Fhip1b
Frzb
Gabra2
Gabra4
Gabra5
Gabrb2
Gal3st3
Galnt16
Galnt17
Gas7
Gba2
Gcc2
Get4
Gfod1
Gfra4
Ggt7
Glt1d1
Gm10419
Gm1976
Gm2415
Gm34567
Gm42517
Gm7336
Gmfb
Gnaz
Gpc4
Gpr162
Gramd1b
Grin1
Grin2a
Grin2b
Grina
Gripap1
Grm1
Grm7
Gsk3a
Gtf2h5
Gtf3c1
Hcfc1
Hcfc2
Hectd2
Hpca
Hpcal4
Hrk
Htr1a
Htr4
Htt
Ica1
Ica1l
Icam5
Igsf8
Il1rapl1
Insyn1
Ints10
Ippk
Iqsec2
Itfg1
Itpka
Kalrn
Kantr
Kbtbd7
Kcnab1
Kcnc1
Kcnc4
Kcng1
Kcnh1
Kcnh3
Kcnip4
Kcnj3
Kcnj4
Kcnj9
Kcnq2
Kcns2
Kcnt2
Kctd16
Kctd6
Khdrbs1
Kif3b
Kifc2
Klc2
Klf16
Klhl22
Klhl26
Klhl29
Klhl3
Kpna1
Krt9
Ksr1
Ksr2
Lamb1
Large1
Lct
Letm1
Lgi1
Lin7a
Lin7b
Lingo1
Lingo3
Lmo3
Lmo7
Lratd1
Lratd2
Lrfn5
Lrp12
Lrrc20
Lrrc7
Lurap1l
Lzts3
Magi1
Mal2
Mamld1
Map2k4
Map3k13
Mapk1
Mapk4
Mapre3
Mas1
Mast3
Mblac2
Med14
Mef2d
Mfsd4a
Mib1
Mindy3
Mink1
Mir124a-1hg
Mmp17
Mpp2
Mpv17l
Mtfp1
Mtmr12
Mtmr3
Mtmr7
mt-Nd4
Mtus2
Myo5b
Mypop
Napa
Napepld
Nat14
Nat8l
Nbr1
Ncs1
Ndfip2
Ndufa10
Ndufaf3
Ndufaf4
Ndufb3
Ndufb4
Ndufb6
Ndufb8
Ndufs2
Necab3
Nefl
Nefm
Neurod1
Neurod2
Nfx1
Ngef
Nkiras1
Nol4
Nos1
Npdc1
Nptx2
Npy1r
Npy2r
Nr3c2
Nrg3
Nrgn
Nrip2
Nsmf
Nt5dc3
Ntng1
Nudcd3
Nudt3
Numbl
Nup93
Ociad1
Ogfod1
Ola1
Olfml2b
Opa1
Osbp2
Osbpl6
Oscp1
Otub1
Paqr9
Pcdh19
Pcdh8
Pcdhb7
Pcsk5
Pde10a
Pde4a
Pde4dip
Pdhb
Pfkl
Pgam5
Pgm1
Phax
Phf24
Phyhip
Pi4ka
Pin1
Pip4k2b
Pip5k1a
Pip5k1b
Pkp2
Plekha3
Plk5
Plppr2
Pmm1
Porcn
Ppil4
Ppp1r12b
Ppp1r1a
Ppp1r9b
Ppp4r4
Pptc7
Praf2
Prdm8
Prepl
Prkab2
Prkar2b
Prkcg
Prkcz
Prrt2
Prrt3
Psd
Psmb5
Psmc5
Ptpn5
Ptpra
Pum1
Pxdn
Pxylp1
Rab15
Rab27b
Rab3c
Rab3ip
Rab40b
Ralyl
Rap1gap2
Rapgef4
Rapgefl1
Rasd2
Rasgef1a
Rasgrf1
Rasgrf2
Rasl10a
Rasl10b
Rbbp5
Rbfox1
Rbfox3
Rcl1
Reps2
Rfxap
Rgs17
Rgs7
Rhot1
Rilpl1
Rimbp2
Rims1
Rin1
Rmnd5b
Rnf112
Rnf165
Rnf208
Rnf6
Rph3a
Rtf1
Rtl6
Rundc3a
Rundc3b
Ryr2
Scn8a
Scnn1a
Sdhd
Sec23ip
Sema3e
Sertad4
Sertm1
Setbp1
Sf3b3
Sgsm2
Sh3glb2
Shank1
Shprh
Slc12a5
Slc16a7
Slc17a7
Slc25a14
Slc25a22
Slc25a46
Slc25a51
Slc30a3
Slc35f3
Slc45a1
Slc6a17
Slc7a4
Smad3
Smg7
Smim13
Smoc2
Snca
Sncb
Snrpd3
Sowaha
Speg
Sptb
Srr
Ss18l1
Sstr2
St6galnac5
Stk32c
Stum
Stx6
Supt6
Sv2c
Svop
Syndig1
Synpo
Synpr
Syt13
Syt17
Syt3
Syt5
Tacc1
Tango2
Taok1
Tbc1d22b
Tbc1d30
Tbpl1
Tecr
Tenm1
Tenm2
Tiam2
Timm23
Timm8b
Tle4
Tmcc1
Tmed9
Tmem132a
Tmem181b-ps
Tmem191c
Tmem198
Tmem38a
Tmem9
Tnks1bp1
Tollip
Tomm20
Tpgs2
Trank1
Trappc12
Trappc2l
Trim28
Trim46
Trnp1
Trpc4
Trpc6
Trpm3
Trub1
Tspoap1
Tspyl5
Ttc19
Ttc33
Tuba4a
Ubald1
Ube2k
Ube2w
Ube4b
Ubr3
Ubxn2b
Ufd1
Unc13a
Unc5d
Uri1
Usp33
Usp45
Usp5
Utp4
Uxs1
Vamp1
Vdac3
Vgf
Vps26b
Vwa3b
Wdr11
Wdr47
Wdr7
Wipf3
Wsb2
X2010204K13Rik
X2810455O05Rik
X2900076A07Rik
X4921524J17Rik
X5730409E04Rik
X9330162G02Rik
Xpo7
Ylpm1
Ypel4
Ypel5
Ythdf1
Zbtb11
Zc3h13
Zc3h14
Zcchc17
Zdhhc8
Zfp142
Zfp667
Zfp831
Zfp871
Zfp955b
Zfpm2
Zmat2
Zranb1
