# Supplementary material for: Single-cell discovery of m6A RNA modifications in the hippocampus
Source: Genome Res. 2024 Jun;34(6):822–36. doi: 10.1101/gr.278424.123 (PMC11293556; doi:10.1101/gr.278424.123)
Supplement: Supplement 21 [file Supplemental_Table_S11.xlsx]

## Sheet: Table S11
Cell number in each cell type
No.cluster	Cell type	E-YTH	E-YTHmut
2	OLG lineage	1415	1243
3	OLG lineage	1280	708
5	OLG lineage	1178	627
6	OLG lineage	950	497
7	OLG lineage	831	409
12	OLG lineage	106	396
13	OLG lineage	194	280
16	OLG lineage	18	379
	Sum	5972	4539
No.cluster	Cell type	E-YTH	E-YTHmut
0	IMC	1475	3488
1	IMC	1006	2741
4	IMC	345	1552
8	IMC	313	775
9	IMC	379	420
10	IMC	238	423
14	IMC	131	336
15	IMC	267	169
17	IMC	89	302
18	IMC	66	251
19	IMC	39	122
20	IMC	9	108
21	IMC	63	49
24	IMC	16	62
25	IMC	27	50
27	IMC	24	10
	Sum	4487	10858
No.cluster	Cell type	E-YTH	E-YTHmut
11	NEUR lineage	232	399
23	NEUR lineage	0	85
	Sum	232	484
No.cluster	Cell type	E-YTH	E-YTHmut
22	ASC	43	52
No.cluster	Cell type	E-YTH	E-YTHmut
26	EC	23	15
Sum		10757	15948
OLG%		55.5173	28.4612
IMC%		41.7124	68.0838
NEUR%		2.15674	3.03486
ASC%		0.39974	0.32606
EC%		0.213814	0.0940557
