# Supplementary material for: Single-cell discovery of m6A RNA modifications in the hippocampus
Source: Genome Res. 2024 Jun;34(6):822–36. doi: 10.1101/gr.278424.123 (PMC11293556; doi:10.1101/gr.278424.123)
Supplement: Supplement 22 [file Supplemental_Table_S12.xlsx]

## Sheet: Table S12
m6A sites per cell per cell type
Cell type	Number cells	Total variants	Average of variants
OLG	5972	612705	102.596
IMC	4487	274170	61.1032
NEUR	232	28112	121.172
ASC	43	7667	178.302
EC	23	595	25.8696
Sum	10757	923249

## Sheet: OLG
chr1	4846919	4846920	Mrpl15	CDS	C2U	6	NA	0.5	-	0	10	0.5	12	C2U	775276_1	6	OLG
chr1	4846919	4846920	Mrpl15	CDS	C2U	9	NA	0.6	-	0	10	0.6	15	C2U	873425_1	12	OLG
chr1	4846919	4846920	Mrpl15	CDS	C2U	12	NA	0.6667	-	0	10	0.6667	18	C2U	87708_1	6	OLG
chr1	4846919	4846920	Mrpl15	CDS	C2U	7	NA	0.7	-	0	10	0.7	10	C2U	177411_1	6	OLG
chr1	4846919	4846920	Mrpl15	CDS	C2U	18	NA	1	-	0	10	1	18	C2U	107058_1	6	OLG
chr1	4846919	4846920	Mrpl15	CDS	C2U	14	NA	1	-	0	10	1	14	C2U	198964_1	6	OLG
chr1	4846919	4846920	Mrpl15	CDS	C2U	11	NA	1	-	0	10	1	11	C2U	207898_1	6	OLG
chr1	4967971	4967972	Tcea1	3UTR	C2U	3	NA	0.3	+	0	10	0.3	10	C2U	489043_1	7	OLG
chr1	4967971	4967972	Tcea1	3UTR	C2U	4	NA	0.4	+	0	10	0.4	10	C2U	83003_1	7	OLG
chr1	4967971	4967972	Tcea1	3UTR	C2U	6	NA	0.4286	+	0	10	0.4286	14	C2U	499801_1	7	OLG
chr1	4967971	4967972	Tcea1	3UTR	C2U	11	NA	0.4783	+	0	10	0.4783	23	C2U	702978_1	7	OLG
chr1	4967971	4967972	Tcea1	3UTR	C2U	9	NA	0.6	+	0	10	0.6	15	C2U	206048_1	7	OLG
chr1	4967971	4967972	Tcea1	3UTR	C2U	8	NA	0.7273	+	0	10	0.7273	11	C2U	136779_1	7	OLG
chr1	4967971	4967972	Tcea1	3UTR	C2U	12	NA	0.8	+	0	10	0.8	15	C2U	561764_1	7	OLG
chr1	9697096	9697097	Vxn	3UTR	C2U	16	NA	0.4211	+	0	10	0.4211	38	C2U	873425_1	12	OLG
chr1	13209690	13209691	Ncoa2	3UTR	C2U	15	NA	0.7143	-	0	10	0.7143	21	C2U	112443_1	6	OLG
chr1	16171993	16171994	Rpl7	CDS	C2U	3	NA	0.25	-	0	10	0.25	12	C2U	497477_1	3	OLG
chr1	16171993	16171994	Rpl7	CDS	C2U	6	NA	0.4	-	0	10	0.4	15	C2U	584502_1	3	OLG
chr1	16171996	16171997	Rpl7	CDS	C2U	4	NA	0.2353	-	0	10	0.2353	17	C2U	53463_1	13	OLG
chr1	16171996	16171997	Rpl7	CDS	C2U	5	NA	0.3571	-	0	10	0.3571	14	C2U	426860_1	2	OLG
chr1	16172027	16172028	Rpl7	CDS	C2U	30	NA	0.3529	-	0	10	0.3529	85	C2U	577881_1	13	OLG
chr1	16172049	16172050	Rpl7	CDS	C2U	6	NA	0.4286	-	0	10	0.4286	14	C2U	568116_1	6	OLG
chr1	16172049	16172050	Rpl7	CDS	C2U	10	NA	0.7692	-	0	10	0.7692	13	C2U	21826_1	2	OLG
chr1	16172049	16172050	Rpl7	CDS	C2U	11	NA	1	-	0	10	1	11	C2U	488531_1	2	OLG
chr1	16172051	16172052	Rpl7	CDS	C2U	4	NA	0.2857	-	0	10	0.2857	14	C2U	378928_1	2	OLG
chr1	16172051	16172052	Rpl7	CDS	C2U	9	NA	0.3103	-	0	10	0.3103	29	C2U	450245_1	13	OLG
chr1	16172051	16172052	Rpl7	CDS	C2U	8	NA	0.4444	-	0	10	0.4444	18	C2U	808013_1	6	OLG
chr1	16172051	16172052	Rpl7	CDS	C2U	9	NA	0.8182	-	0	10	0.8182	11	C2U	138495_1	2	OLG
chr1	16172052	16172053	Rpl7	CDS	C2U	3	NA	0.25	-	0	10	0.25	12	C2U	580457_1	3	OLG
chr1	16172052	16172053	Rpl7	CDS	C2U	13	NA	0.2708	-	0	10	0.2708	48	C2U	838413_1	13	OLG
chr1	16172052	16172053	Rpl7	CDS	C2U	5	NA	0.2941	-	0	10	0.2941	17	C2U	667778_1	3	OLG
chr1	16172052	16172053	Rpl7	CDS	C2U	6	NA	0.4286	-	0	10	0.4286	14	C2U	831535_1	12	OLG
chr1	16172052	16172053	Rpl7	CDS	C2U	11	NA	0.6111	-	0	10	0.6111	18	C2U	661124_1	2	OLG
chr1	16172052	16172053	Rpl7	CDS	C2U	7	NA	0.6364	-	0	10	0.6364	11	C2U	375185_1	7	OLG
chr1	16172052	16172053	Rpl7	CDS	C2U	8	NA	0.7273	-	0	10	0.7273	11	C2U	814510_1	2	OLG
chr1	16172065	16172066	Rpl7	CDS	C2U	9	NA	0.6429	-	0	10	0.6429	14	C2U	617667_1	3	OLG
chr1	16172069	16172070	Rpl7	CDS	C2U	12	NA	0.3158	-	0	10	0.3158	38	C2U	675296_1	13	OLG
chr1	16172070	16172071	Rpl7	CDS	C2U	4	NA	0.3333	-	0	10	0.3333	12	C2U	275396_1	5	OLG
chr1	16172070	16172071	Rpl7	CDS	C2U	5	NA	0.3846	-	0	10	0.3846	13	C2U	75036_1	6	OLG
chr1	16172070	16172071	Rpl7	CDS	C2U	7	NA	0.5833	-	0	10	0.5833	12	C2U	691344_1	3	OLG
chr1	16172100	16172101	Rpl7	CDS	C2U	4	NA	0.2	-	0	10	0.2	20	C2U	387672_1	13	OLG
chr1	16172111	16172112	Rpl7	CDS	C2U	8	NA	0.4444	-	0	10	0.4444	18	C2U	325403_1	13	OLG
chr1	16172111	16172112	Rpl7	CDS	C2U	13	NA	0.52	-	0	10	0.52	25	C2U	759184_1	3	OLG
chr1	16172111	16172112	Rpl7	CDS	C2U	7	NA	0.6364	-	0	10	0.6364	11	C2U	361656_1	3	OLG
chr1	16172111	16172112	Rpl7	CDS	C2U	7	NA	0.7	-	0	10	0.7	10	C2U	422308_1	2	OLG
chr1	16172111	16172112	Rpl7	CDS	C2U	7	NA	0.7	-	0	10	0.7	10	C2U	467149_1	3	OLG
chr1	16172111	16172112	Rpl7	CDS	C2U	13	NA	0.8125	-	0	10	0.8125	16	C2U	222235_1	12	OLG
chr1	16172111	16172112	Rpl7	CDS	C2U	9	NA	0.8182	-	0	10	0.8182	11	C2U	22830_1	12	OLG
chr1	16172111	16172112	Rpl7	CDS	C2U	19	NA	1	-	0	10	1	19	C2U	190355_1	3	OLG
chr1	16172111	16172112	Rpl7	CDS	C2U	10	NA	1	-	0	10	1	10	C2U	484226_1	5	OLG
chr1	16172124	16172125	Rpl7	CDS	C2U	10	NA	0.3846	-	0	10	0.3846	26	C2U	288754_1	2	OLG
chr1	16172124	16172125	Rpl7	CDS	C2U	7	NA	0.4118	-	0	10	0.4118	17	C2U	94395_1	7	OLG
chr1	16172124	16172125	Rpl7	CDS	C2U	6	NA	0.4286	-	0	10	0.4286	14	C2U	574803_1	12	OLG
chr1	16172124	16172125	Rpl7	CDS	C2U	9	NA	0.5	-	0	10	0.5	18	C2U	125203_1	7	OLG
chr1	16172124	16172125	Rpl7	CDS	C2U	8	NA	0.5	-	0	10	0.5	16	C2U	184193_1	2	OLG
chr1	16172124	16172125	Rpl7	CDS	C2U	6	NA	0.5	-	0	10	0.5	12	C2U	690078_1	2	OLG
chr1	16172124	16172125	Rpl7	CDS	C2U	11	NA	0.5238	-	0	10	0.5238	21	C2U	34047_1	7	OLG
chr1	16172124	16172125	Rpl7	CDS	C2U	9	NA	0.5625	-	0	10	0.5625	16	C2U	470036_1	2	OLG
chr1	16172124	16172125	Rpl7	CDS	C2U	10	NA	1	-	0	10	1	10	C2U	453500_1	7	OLG
chr1	16172140	16172141	Rpl7	CDS	C2U	5	NA	0.5	-	0	10	0.5	10	C2U	306272_1	6	OLG
chr1	16172140	16172141	Rpl7	CDS	C2U	12	NA	0.8571	-	0	10	0.8571	14	C2U	749077_1	6	OLG
chr1	16172782	16172783	Rpl7	CDS	C2U	10	NA	0.5556	-	0	10	0.5556	18	C2U	229949_1	13	OLG
chr1	21300084	21300085	Tmem14a	3UTR	C2U	12	NA	1	+	0	10	1	12	C2U	84196_1	5	OLG
chr1	21300092	21300093	Tmem14a	3UTR	C2U	5	NA	0.3571	+	0	10	0.3571	14	C2U	434750_1	2	OLG
chr1	21300092	21300093	Tmem14a	3UTR	C2U	23	NA	1	+	0	10	1	23	C2U	158822_1	2	OLG
chr1	21300092	21300093	Tmem14a	3UTR	C2U	12	NA	1	+	0	10	1	12	C2U	320723_1	2	OLG
chr1	21300092	21300093	Tmem14a	3UTR	C2U	10	NA	1	+	0	10	1	10	C2U	631188_1	2	OLG
chr1	21300092	21300093	Tmem14a	3UTR	C2U	13	NA	1	+	0	10	1	13	C2U	684065_1	2	OLG
chr1	21300092	21300093	Tmem14a	3UTR	C2U	12	NA	1	+	0	10	1	12	C2U	839236_1	2	OLG
chr1	21300092	21300093	Tmem14a	3UTR	C2U	10	NA	1	+	0	10	1	10	C2U	85207_1	2	OLG
chr1	21300109	21300110	Tmem14a	3UTR	C2U	5	NA	0.4167	+	0	10	0.4167	12	C2U	250842_1	3	OLG
chr1	21300119	21300120	Tmem14a	3UTR	C2U	10	NA	0.4	+	0	10	0.4	25	C2U	675686_1	6	OLG
chr1	21300119	21300120	Tmem14a	3UTR	C2U	10	NA	0.5556	+	0	10	0.5556	18	C2U	167821_1	6	OLG
chr1	21300119	21300120	Tmem14a	3UTR	C2U	8	NA	0.6154	+	0	10	0.6154	13	C2U	224885_1	6	OLG
chr1	21300119	21300120	Tmem14a	3UTR	C2U	8	NA	0.6154	+	0	10	0.6154	13	C2U	472625_1	6	OLG
chr1	21300119	21300120	Tmem14a	3UTR	C2U	11	NA	0.9167	+	0	10	0.9167	12	C2U	513481_1	6	OLG
chr1	21300119	21300120	Tmem14a	3UTR	C2U	10	NA	1	+	0	10	1	10	C2U	115567_1	6	OLG
chr1	21300119	21300120	Tmem14a	3UTR	C2U	14	NA	1	+	0	10	1	14	C2U	794148_1	6	OLG
chr1	21300137	21300138	Tmem14a	3UTR	C2U	9	NA	0.6	+	0	10	0.6	15	C2U	882119_1	6	OLG
chr1	21300144	21300145	Tmem14a	3UTR	C2U	5	NA	0.5	+	0	10	0.5	10	C2U	465349_1	5	OLG
chr1	21300144	21300145	Tmem14a	3UTR	C2U	6	NA	0.6	+	0	10	0.6	10	C2U	126620_1	5	OLG
chr1	21300154	21300155	Tmem14a	3UTR	C2U	7	NA	0.5385	+	0	10	0.5385	13	C2U	211321_1	6	OLG
chr1	21300154	21300155	Tmem14a	3UTR	C2U	6	NA	0.6	+	0	10	0.6	10	C2U	471901_1	6	OLG
chr1	21300154	21300155	Tmem14a	3UTR	C2U	9	NA	0.6	+	0	10	0.6	15	C2U	513540_1	6	OLG
chr1	21300154	21300155	Tmem14a	3UTR	C2U	8	NA	0.6154	+	0	10	0.6154	13	C2U	224885_1	6	OLG
chr1	21300154	21300155	Tmem14a	3UTR	C2U	8	NA	0.6154	+	0	10	0.6154	13	C2U	281087_1	6	OLG
chr1	21300154	21300155	Tmem14a	3UTR	C2U	15	NA	0.6818	+	0	10	0.6818	22	C2U	397557_1	6	OLG
chr1	21300154	21300155	Tmem14a	3UTR	C2U	11	NA	0.6875	+	0	10	0.6875	16	C2U	525704_1	6	OLG
chr1	21300154	21300155	Tmem14a	3UTR	C2U	15	NA	0.9375	+	0	10	0.9375	16	C2U	451634_1	2	OLG
chr1	21300154	21300155	Tmem14a	3UTR	C2U	23	NA	1	+	0	10	1	23	C2U	158822_1	2	OLG
chr1	21300154	21300155	Tmem14a	3UTR	C2U	10	NA	1	+	0	10	1	10	C2U	276886_1	6	OLG
chr1	21300154	21300155	Tmem14a	3UTR	C2U	10	NA	1	+	0	10	1	10	C2U	312682_1	6	OLG
chr1	21300154	21300155	Tmem14a	3UTR	C2U	11	NA	1	+	0	10	1	11	C2U	345783_1	2	OLG
chr1	21300154	21300155	Tmem14a	3UTR	C2U	13	NA	1	+	0	10	1	13	C2U	357176_1	6	OLG
chr1	21300154	21300155	Tmem14a	3UTR	C2U	16	NA	1	+	0	10	1	16	C2U	520795_1	2	OLG
chr1	21300154	21300155	Tmem14a	3UTR	C2U	13	NA	1	+	0	10	1	13	C2U	570982_1	6	OLG
chr1	21300154	21300155	Tmem14a	3UTR	C2U	10	NA	1	+	0	10	1	10	C2U	77060_1	6	OLG
chr1	21300154	21300155	Tmem14a	3UTR	C2U	13	NA	1	+	0	10	1	13	C2U	775276_1	6	OLG
chr1	21300154	21300155	Tmem14a	3UTR	C2U	14	NA	1	+	0	10	1	14	C2U	781769_1	6	OLG
chr1	21300154	21300155	Tmem14a	3UTR	C2U	15	NA	1	+	0	10	1	15	C2U	786395_1	2	OLG
chr1	21300154	21300155	Tmem14a	3UTR	C2U	16	NA	1	+	0	10	1	16	C2U	830331_1	2	OLG
chr1	21300154	21300155	Tmem14a	3UTR	C2U	12	NA	1	+	0	10	1	12	C2U	839236_1	2	OLG
chr1	23409004	23409005	Ogfrl1	CDS	C2U	7	NA	0.7	-	0	10	0.7	10	C2U	678459_1	13	OLG
chr1	23409004	23409005	Ogfrl1	CDS	C2U	11	NA	0.8462	-	0	10	0.8462	13	C2U	641555_1	13	OLG
chr1	23885015	23885016	Smap1	3UTR	C2U	10	NA	1	-	0	10	1	10	C2U	613296_1	5	OLG
chr1	24801809	24801810	Lmbrd1	CDS	C2U	9	NA	0.75	+	0	10	0.75	12	C2U	118356_1	5	OLG
chr1	24801867	24801868	Lmbrd1	3UTR	C2U	5	NA	0.2778	+	0	10	0.2778	18	C2U	273023_1	2	OLG
chr1	24801867	24801868	Lmbrd1	3UTR	C2U	9	NA	0.5294	+	0	10	0.5294	17	C2U	771063_1	2	OLG
chr1	24801946	24801947	Lmbrd1	3UTR	C2U	3	NA	0.3	+	0	10	0.3	10	C2U	763056_1	3	OLG
chr1	24801946	24801947	Lmbrd1	3UTR	C2U	8	NA	0.5	+	0	10	0.5	16	C2U	12692_1	3	OLG
chr1	24801946	24801947	Lmbrd1	3UTR	C2U	7	NA	0.7	+	0	10	0.7	10	C2U	653431_1	3	OLG
chr1	24801946	24801947	Lmbrd1	3UTR	C2U	10	NA	1	+	0	10	1	10	C2U	730328_1	3	OLG
chr1	24801946	24801947	Lmbrd1	3UTR	C2U	11	NA	1	+	0	10	1	11	C2U	741938_1	3	OLG
chr1	24802389	24802390	Lmbrd1	3UTR	C2U	14	NA	1	+	0	10	1	14	C2U	496177_1	5	OLG
chr1	24802389	24802390	Lmbrd1	3UTR	C2U	12	NA	1	+	0	10	1	12	C2U	696603_1	2	OLG
chr1	24802389	24802390	Lmbrd1	3UTR	C2U	15	NA	1	+	0	10	1	15	C2U	698577_1	2	OLG
chr1	24805118	24805119	Lmbrd1	3UTR	C2U	3	NA	0.2727	+	0	10	0.2727	11	C2U	378948_1	2	OLG
chr1	30980746	30980747	Ptp4a1	3UTR	C2U	8	NA	0.5714	-	0	10	0.5714	14	C2U	390571_1	5	OLG
chr1	30980778	30980779	Ptp4a1	3UTR	C2U	12	NA	0.8	-	0	10	0.8	15	C2U	262032_1	5	OLG
chr1	30981708	30981709	Ptp4a1	3UTR	C2U	7	NA	0.7	-	0	10	0.7	10	C2U	9158_1	6	OLG
chr1	36738502	36738503	Actr1b	3UTR	C2U	10	NA	1	-	0	10	1	10	C2U	516563_1	5	OLG
chr1	37477768	37477769	Unc50	CDS	C2U	3	NA	0.3	+	0	10	0.3	10	C2U	607804_1	2	OLG
chr1	38026624	38026625	Txndc9	3UTR	C2U	11	NA	1	-	0	10	1	11	C2U	357176_1	6	OLG
chr1	38026688	38026689	Txndc9	3UTR	C2U	8	NA	0.4706	-	0	10	0.4706	17	C2U	71104_1	13	OLG
chr1	38026706	38026707	Txndc9	3UTR	C2U	5	NA	0.3333	-	0	10	0.3333	15	C2U	604255_1	5	OLG
chr1	38026745	38026746	Txndc9	CDS	C2U	11	NA	0.7857	-	0	10	0.7857	14	C2U	377150_1	3	OLG
chr1	38026745	38026746	Txndc9	CDS	C2U	10	NA	0.8333	-	0	10	0.8333	12	C2U	331253_1	3	OLG
chr1	38026745	38026746	Txndc9	CDS	C2U	16	NA	0.8889	-	0	10	0.8889	18	C2U	693792_1	3	OLG
chr1	39407279	39407280	Rpl31	CDS	C2U	11	NA	0.8462	+	0	10	0.8462	13	C2U	483859_1	7	OLG
chr1	39407282	39407283	Rpl31	CDS	C2U	8	NA	0.4211	+	0	10	0.4211	19	C2U	790916_1	3	OLG
chr1	39407282	39407283	Rpl31	CDS	C2U	11	NA	1	+	0	10	1	11	C2U	809005_1	3	OLG
chr1	39407312	39407313	Rpl31	CDS	C2U	10	NA	0.2703	+	0	10	0.2703	37	C2U	424009_1	13	OLG
chr1	39407312	39407313	Rpl31	CDS	C2U	6	NA	0.3529	+	0	10	0.3529	17	C2U	133023_1	13	OLG
chr1	39407312	39407313	Rpl31	CDS	C2U	10	NA	0.4545	+	0	10	0.4545	22	C2U	565992_1	13	OLG
chr1	39407316	39407317	Rpl31	CDS	C2U	8	NA	0.3636	+	0	10	0.3636	22	C2U	645242_1	7	OLG
chr1	39407316	39407317	Rpl31	CDS	C2U	12	NA	0.4444	+	0	10	0.4444	27	C2U	385073_1	13	OLG
chr1	39407316	39407317	Rpl31	CDS	C2U	14	NA	0.6667	+	0	10	0.6667	21	C2U	98611_1	13	OLG
chr1	39407316	39407317	Rpl31	CDS	C2U	10	NA	0.7692	+	0	10	0.7692	13	C2U	257356_1	7	OLG
chr1	39407316	39407317	Rpl31	CDS	C2U	10	NA	0.9091	+	0	10	0.9091	11	C2U	54805_1	6	OLG
chr1	39407316	39407317	Rpl31	CDS	C2U	11	NA	1	+	0	10	1	11	C2U	24830_1	3	OLG
chr1	39407316	39407317	Rpl31	CDS	C2U	10	NA	1	+	0	10	1	10	C2U	801511_1	2	OLG
chr1	39407316	39407317	Rpl31	CDS	C2U	13	NA	1	+	0	10	1	13	C2U	873248_1	2	OLG
chr1	39407318	39407319	Rpl31	CDS	C2U	15	NA	0.4545	+	0	10	0.4545	33	C2U	464560_1	13	OLG
chr1	39407318	39407319	Rpl31	CDS	C2U	9	NA	0.75	+	0	10	0.75	12	C2U	223114_1	2	OLG
chr1	39407318	39407319	Rpl31	CDS	C2U	10	NA	0.7692	+	0	10	0.7692	13	C2U	201261_1	16	OLG
chr1	39407318	39407319	Rpl31	CDS	C2U	14	NA	0.7778	+	0	10	0.7778	18	C2U	853380_1	7	OLG
chr1	39407318	39407319	Rpl31	CDS	C2U	9	NA	0.8182	+	0	10	0.8182	11	C2U	177492_1	2	OLG
chr1	39407318	39407319	Rpl31	CDS	C2U	16	NA	0.8889	+	0	10	0.8889	18	C2U	98204_1	6	OLG
chr1	39407318	39407319	Rpl31	CDS	C2U	15	NA	0.9375	+	0	10	0.9375	16	C2U	554859_1	2	OLG
chr1	39407318	39407319	Rpl31	CDS	C2U	12	NA	1	+	0	10	1	12	C2U	783631_1	6	OLG
chr1	39407318	39407319	Rpl31	CDS	C2U	10	NA	1	+	0	10	1	10	C2U	815546_1	2	OLG
chr1	39409114	39409115	Rpl31	CDS	C2U	11	NA	0.44	+	0	10	0.44	25	C2U	501238_1	6	OLG
chr1	39409116	39409117	Rpl31	CDS	C2U	2	NA	0.1053	+	0	10	0.1053	19	C2U	229168_1	13	OLG
chr1	39409116	39409117	Rpl31	CDS	C2U	4	NA	0.1667	+	0	10	0.1667	24	C2U	824500_1	13	OLG
chr1	39409116	39409117	Rpl31	CDS	C2U	6	NA	0.4	+	0	10	0.4	15	C2U	292798_1	13	OLG
chr1	39409120	39409121	Rpl31	CDS	C2U	10	NA	0.2273	+	0	10	0.2273	44	C2U	464560_1	13	OLG
chr1	39409120	39409121	Rpl31	CDS	C2U	7	NA	0.4375	+	0	10	0.4375	16	C2U	273499_1	12	OLG
chr1	39409120	39409121	Rpl31	CDS	C2U	9	NA	0.5625	+	0	10	0.5625	16	C2U	243433_1	5	OLG
chr1	39409120	39409121	Rpl31	CDS	C2U	6	NA	0.6	+	0	10	0.6	10	C2U	609738_1	2	OLG
chr1	39409120	39409121	Rpl31	CDS	C2U	10	NA	1	+	0	10	1	10	C2U	386473_1	2	OLG
chr1	39409122	39409123	Rpl31	CDS	C2U	5	NA	0.4167	+	0	10	0.4167	12	C2U	721820_1	16	OLG
chr1	39409124	39409125	Rpl31	CDS	C2U	7	NA	0.6364	+	0	10	0.6364	11	C2U	557970_1	7	OLG
chr1	39409134	39409135	Rpl31	CDS	C2U	13	NA	0.2097	+	0	10	0.2097	62	C2U	347333_1	13	OLG
chr1	39409134	39409135	Rpl31	CDS	C2U	6	NA	0.3529	+	0	10	0.3529	17	C2U	326330_1	13	OLG
chr1	39409134	39409135	Rpl31	CDS	C2U	9	NA	0.8182	+	0	10	0.8182	11	C2U	883030_1	2	OLG
chr1	39409184	39409185	Rpl31	CDS	C2U	8	NA	0.1739	+	0	10	0.1739	46	C2U	450245_1	13	OLG
chr1	39409188	39409189	Rpl31	CDS	C2U	3	NA	0.2727	+	0	10	0.2727	11	C2U	650314_1	12	OLG
chr1	39409188	39409189	Rpl31	CDS	C2U	11	NA	0.6471	+	0	10	0.6471	17	C2U	877295_1	6	OLG
chr1	39409190	39409191	Rpl31	CDS	C2U	11	NA	1	+	0	10	1	11	C2U	436508_1	5	OLG
chr1	39409207	39409208	Rpl31	CDS	C2U	6	NA	0.2308	+	0	10	0.2308	26	C2U	831535_1	12	OLG
chr1	39409207	39409208	Rpl31	CDS	C2U	14	NA	0.5385	+	0	10	0.5385	26	C2U	260759_1	6	OLG
chr1	39409208	39409209	Rpl31	CDS	C2U	7	NA	0.3182	+	0	10	0.3182	22	C2U	81454_1	13	OLG
chr1	39410052	39410053	Rpl31	CDS	C2U	4	NA	0.2667	+	0	10	0.2667	15	C2U	13093_1	2	OLG
chr1	39410052	39410053	Rpl31	CDS	C2U	8	NA	0.2857	+	0	10	0.2857	28	C2U	848239_1	2	OLG
chr1	39410061	39410062	Rpl31	CDS	C2U	5	NA	0.3846	+	0	10	0.3846	13	C2U	445734_1	2	OLG
chr1	39410066	39410067	Rpl31	CDS	C2U	3	NA	0.2	+	0	10	0.2	15	C2U	407842_1	13	OLG
chr1	39410096	39410097	Rpl31	CDS	C2U	5	NA	0.3846	+	0	10	0.3846	13	C2U	146142_1	12	OLG
chr1	39410124	39410125	Rpl31	CDS	C2U	5	NA	0.2	+	0	10	0.2	25	C2U	807778_1	13	OLG
chr1	39410124	39410125	Rpl31	CDS	C2U	5	NA	0.5	+	0	10	0.5	10	C2U	816333_1	13	OLG
chr1	39410136	39410137	Rpl31	CDS	C2U	6	NA	0.4615	+	0	10	0.4615	13	C2U	436001_1	12	OLG
chr1	39410415	39410416	Rpl31	3UTR	C2U	4	NA	0.2667	+	0	10	0.2667	15	C2U	98611_1	13	OLG
chr1	39410420	39410421	Rpl31	3UTR	C2U	2	NA	0.1429	+	0	10	0.1429	14	C2U	306232_1	13	OLG
chr1	39410420	39410421	Rpl31	3UTR	C2U	2	NA	0.1538	+	0	10	0.1538	13	C2U	668970_1	13	OLG
chr1	39591046	39591047	Rnf149	3UTR	C2U	13	NA	0.7222	-	0	10	0.7222	18	C2U	425842_1	13	OLG
chr1	40064735	40064736	Map4k4	3UTR	C2U	6	NA	0.375	+	0	10	0.375	16	C2U	206489_1	2	OLG
chr1	40064735	40064736	Map4k4	3UTR	C2U	8	NA	0.5	+	0	10	0.5	16	C2U	361078_1	2	OLG
chr1	40064735	40064736	Map4k4	3UTR	C2U	13	NA	0.5909	+	0	10	0.5909	22	C2U	741677_1	2	OLG
chr1	40064735	40064736	Map4k4	3UTR	C2U	15	NA	1	+	0	10	1	15	C2U	135813_1	6	OLG
chr1	40064735	40064736	Map4k4	3UTR	C2U	15	NA	1	+	0	10	1	15	C2U	312682_1	6	OLG
chr1	40064735	40064736	Map4k4	3UTR	C2U	15	NA	1	+	0	10	1	15	C2U	98204_1	6	OLG
chr1	40064759	40064760	Map4k4	3UTR	C2U	7	NA	0.7	+	0	10	0.7	10	C2U	95287_1	5	OLG
chr1	40064790	40064791	Map4k4	3UTR	C2U	2	NA	0.125	+	0	10	0.125	16	C2U	646834_1	12	OLG
chr1	40065089	40065090	Map4k4	3UTR	C2U	8	NA	0.6154	+	0	10	0.6154	13	C2U	873425_1	12	OLG
chr1	40065230	40065231	Map4k4	3UTR	C2U	13	NA	1	+	0	10	1	13	C2U	349109_1	12	OLG
chr1	40065361	40065362	Map4k4	3UTR	C2U	5	NA	0.3333	+	0	10	0.3333	15	C2U	818894_1	12	OLG
chr1	40065361	40065362	Map4k4	3UTR	C2U	10	NA	1	+	0	10	1	10	C2U	454481_1	7	OLG
chr1	40065366	40065367	Map4k4	3UTR	C2U	9	NA	0.6429	+	0	10	0.6429	14	C2U	107830_1	2	OLG
chr1	40065376	40065377	Map4k4	3UTR	C2U	9	NA	0.6429	+	0	10	0.6429	14	C2U	45884_1	12	OLG
chr1	40065406	40065407	Map4k4	3UTR	C2U	8	NA	0.6667	+	0	10	0.6667	12	C2U	143922_1	6	OLG
chr1	42739069	42739070	Pou3f3	3UTR	C2U	7	NA	0.7	+	0	10	0.7	10	C2U	829487_1	7	OLG
chr1	42739069	42739070	Pou3f3	3UTR	C2U	11	NA	0.8462	+	0	10	0.8462	13	C2U	129995_1	5	OLG
chr1	42739069	42739070	Pou3f3	3UTR	C2U	13	NA	1	+	0	10	1	13	C2U	130007_1	5	OLG
chr1	42739069	42739070	Pou3f3	3UTR	C2U	12	NA	1	+	0	10	1	12	C2U	16557_1	7	OLG
chr1	42739069	42739070	Pou3f3	3UTR	C2U	11	NA	1	+	0	10	1	11	C2U	334549_1	5	OLG
chr1	42739069	42739070	Pou3f3	3UTR	C2U	12	NA	1	+	0	10	1	12	C2U	841568_1	5	OLG
chr1	42739136	42739137	Pou3f3	3UTR	C2U	2	NA	0.2	+	0	10	0.2	10	C2U	548515_1	2	OLG
chr1	42739136	42739137	Pou3f3	3UTR	C2U	10	NA	0.625	+	0	10	0.625	16	C2U	320723_1	2	OLG
chr1	42739136	42739137	Pou3f3	3UTR	C2U	7	NA	0.6364	+	0	10	0.6364	11	C2U	411704_1	2	OLG
chr1	42739136	42739137	Pou3f3	3UTR	C2U	10	NA	0.9091	+	0	10	0.9091	11	C2U	121588_1	2	OLG
chr1	42739136	42739137	Pou3f3	3UTR	C2U	12	NA	1	+	0	10	1	12	C2U	195689_1	2	OLG
chr1	42739136	42739137	Pou3f3	3UTR	C2U	10	NA	1	+	0	10	1	10	C2U	255634_1	2	OLG
chr1	42739155	42739156	Pou3f3	3UTR	C2U	8	NA	0.4211	+	0	10	0.4211	19	C2U	845512_1	6	OLG
chr1	42739155	42739156	Pou3f3	3UTR	C2U	10	NA	1	+	0	10	1	10	C2U	698748_1	6	OLG
chr1	42739170	42739171	Pou3f3	3UTR	C2U	10	NA	0.5263	+	0	10	0.5263	19	C2U	54604_1	3	OLG
chr1	42739170	42739171	Pou3f3	3UTR	C2U	14	NA	1	+	0	10	1	14	C2U	179662_1	3	OLG
chr1	42739170	42739171	Pou3f3	3UTR	C2U	15	NA	1	+	0	10	1	15	C2U	616647_1	3	OLG
chr1	51224611	51224612	Tmeff2	CDS	C2U	6	NA	0.2857	+	0	10	0.2857	21	C2U	809470_1	5	OLG
chr1	51224611	51224612	Tmeff2	CDS	C2U	5	NA	0.3846	+	0	10	0.3846	13	C2U	815906_1	5	OLG
chr1	51224611	51224612	Tmeff2	CDS	C2U	10	NA	0.4545	+	0	10	0.4545	22	C2U	424472_1	5	OLG
chr1	51224611	51224612	Tmeff2	CDS	C2U	7	NA	0.5	+	0	10	0.5	14	C2U	747444_1	5	OLG
chr1	51224669	51224670	Tmeff2	3UTR	C2U	7	NA	0.3182	+	0	10	0.3182	22	C2U	714806_1	2	OLG
chr1	51224673	51224674	Tmeff2	3UTR	C2U	4	NA	0.25	+	0	10	0.25	16	C2U	735484_1	3	OLG
chr1	51224673	51224674	Tmeff2	3UTR	C2U	17	NA	0.7391	+	0	10	0.7391	23	C2U	445082_1	2	OLG
chr1	51224687	51224688	Tmeff2	3UTR	C2U	8	NA	0.2759	+	0	10	0.2759	29	C2U	249480_1	12	OLG
chr1	51224687	51224688	Tmeff2	3UTR	C2U	3	NA	0.3	+	0	10	0.3	10	C2U	111795_1	2	OLG
chr1	51224687	51224688	Tmeff2	3UTR	C2U	4	NA	0.3333	+	0	10	0.3333	12	C2U	113324_1	12	OLG
chr1	51224687	51224688	Tmeff2	3UTR	C2U	4	NA	0.3333	+	0	10	0.3333	12	C2U	350720_1	2	OLG
chr1	51224687	51224688	Tmeff2	3UTR	C2U	8	NA	0.381	+	0	10	0.381	21	C2U	297229_1	2	OLG
chr1	51224687	51224688	Tmeff2	3UTR	C2U	7	NA	0.4375	+	0	10	0.4375	16	C2U	117236_1	2	OLG
chr1	51224687	51224688	Tmeff2	3UTR	C2U	7	NA	0.4375	+	0	10	0.4375	16	C2U	169394_1	2	OLG
chr1	51224687	51224688	Tmeff2	3UTR	C2U	5	NA	0.4545	+	0	10	0.4545	11	C2U	333104_1	2	OLG
chr1	51224687	51224688	Tmeff2	3UTR	C2U	6	NA	0.4615	+	0	10	0.4615	13	C2U	335675_1	3	OLG
chr1	51224687	51224688	Tmeff2	3UTR	C2U	12	NA	0.48	+	0	10	0.48	25	C2U	382406_1	6	OLG
chr1	51224687	51224688	Tmeff2	3UTR	C2U	5	NA	0.5	+	0	10	0.5	10	C2U	322348_1	3	OLG
chr1	51224687	51224688	Tmeff2	3UTR	C2U	10	NA	0.5	+	0	10	0.5	20	C2U	652098_1	3	OLG
chr1	51224687	51224688	Tmeff2	3UTR	C2U	8	NA	0.5	+	0	10	0.5	16	C2U	747136_1	3	OLG
chr1	51224687	51224688	Tmeff2	3UTR	C2U	7	NA	0.5385	+	0	10	0.5385	13	C2U	304349_1	3	OLG
chr1	51224687	51224688	Tmeff2	3UTR	C2U	7	NA	0.5385	+	0	10	0.5385	13	C2U	663013_1	13	OLG
chr1	51224687	51224688	Tmeff2	3UTR	C2U	16	NA	0.5714	+	0	10	0.5714	28	C2U	237455_1	6	OLG
chr1	51224687	51224688	Tmeff2	3UTR	C2U	7	NA	0.5833	+	0	10	0.5833	12	C2U	842727_1	13	OLG
chr1	51224687	51224688	Tmeff2	3UTR	C2U	12	NA	0.6316	+	0	10	0.6316	19	C2U	625883_1	6	OLG
chr1	51224687	51224688	Tmeff2	3UTR	C2U	7	NA	0.6364	+	0	10	0.6364	11	C2U	220356_1	2	OLG
chr1	51224687	51224688	Tmeff2	3UTR	C2U	9	NA	0.6429	+	0	10	0.6429	14	C2U	540094_1	3	OLG
chr1	51224687	51224688	Tmeff2	3UTR	C2U	8	NA	0.6667	+	0	10	0.6667	12	C2U	101548_1	6	OLG
chr1	51224687	51224688	Tmeff2	3UTR	C2U	8	NA	0.6667	+	0	10	0.6667	12	C2U	424009_1	13	OLG
chr1	51224687	51224688	Tmeff2	3UTR	C2U	8	NA	0.8	+	0	10	0.8	10	C2U	26250_1	2	OLG
chr1	51224687	51224688	Tmeff2	3UTR	C2U	10	NA	0.9091	+	0	10	0.9091	11	C2U	11901_1	6	OLG
chr1	51224687	51224688	Tmeff2	3UTR	C2U	11	NA	0.9167	+	0	10	0.9167	12	C2U	103984_1	2	OLG
chr1	51224687	51224688	Tmeff2	3UTR	C2U	15	NA	1	+	0	10	1	15	C2U	110820_1	5	OLG
chr1	51224687	51224688	Tmeff2	3UTR	C2U	11	NA	1	+	0	10	1	11	C2U	113759_1	3	OLG
chr1	51224687	51224688	Tmeff2	3UTR	C2U	10	NA	1	+	0	10	1	10	C2U	276663_1	5	OLG
chr1	51224692	51224693	Tmeff2	3UTR	C2U	7	NA	0.2917	+	0	10	0.2917	24	C2U	160029_1	6	OLG
chr1	51224692	51224693	Tmeff2	3UTR	C2U	4	NA	0.3333	+	0	10	0.3333	12	C2U	107058_1	6	OLG
chr1	51224692	51224693	Tmeff2	3UTR	C2U	7	NA	0.3333	+	0	10	0.3333	21	C2U	504188_1	6	OLG
chr1	51224692	51224693	Tmeff2	3UTR	C2U	6	NA	0.3529	+	0	10	0.3529	17	C2U	112370_1	6	OLG
chr1	51224692	51224693	Tmeff2	3UTR	C2U	10	NA	1	+	0	10	1	10	C2U	200387_1	6	OLG
chr1	51224692	51224693	Tmeff2	3UTR	C2U	19	NA	1	+	0	10	1	19	C2U	591594_1	6	OLG
chr1	51224704	51224705	Tmeff2	3UTR	C2U	6	NA	0.6	+	0	10	0.6	10	C2U	480167_1	3	OLG
chr1	51224704	51224705	Tmeff2	3UTR	C2U	18	NA	0.6923	+	0	10	0.6923	26	C2U	557579_1	3	OLG
chr1	51224704	51224705	Tmeff2	3UTR	C2U	9	NA	0.6923	+	0	10	0.6923	13	C2U	773047_1	3	OLG
chr1	51224717	51224718	Tmeff2	3UTR	C2U	5	NA	0.2273	+	0	10	0.2273	22	C2U	559342_1	3	OLG
chr1	51224717	51224718	Tmeff2	3UTR	C2U	5	NA	0.2632	+	0	10	0.2632	19	C2U	14674_1	3	OLG
chr1	51224717	51224718	Tmeff2	3UTR	C2U	6	NA	0.2727	+	0	10	0.2727	22	C2U	522268_1	3	OLG
chr1	51224717	51224718	Tmeff2	3UTR	C2U	9	NA	0.3462	+	0	10	0.3462	26	C2U	557579_1	3	OLG
chr1	51224717	51224718	Tmeff2	3UTR	C2U	7	NA	0.3889	+	0	10	0.3889	18	C2U	58415_1	3	OLG
chr1	51224717	51224718	Tmeff2	3UTR	C2U	9	NA	0.4737	+	0	10	0.4737	19	C2U	250563_1	3	OLG
chr1	51224726	51224727	Tmeff2	3UTR	C2U	4	NA	0.1739	+	0	10	0.1739	23	C2U	14235_1	3	OLG
chr1	51224726	51224727	Tmeff2	3UTR	C2U	3	NA	0.1875	+	0	10	0.1875	16	C2U	525121_1	3	OLG
chr1	51224726	51224727	Tmeff2	3UTR	C2U	7	NA	0.3684	+	0	10	0.3684	19	C2U	374013_1	3	OLG
chr1	51224726	51224727	Tmeff2	3UTR	C2U	5	NA	0.3846	+	0	10	0.3846	13	C2U	304349_1	3	OLG
chr1	51224726	51224727	Tmeff2	3UTR	C2U	7	NA	0.5385	+	0	10	0.5385	13	C2U	335675_1	3	OLG
chr1	51224726	51224727	Tmeff2	3UTR	C2U	14	NA	0.6087	+	0	10	0.6087	23	C2U	795053_1	3	OLG
chr1	51224726	51224727	Tmeff2	3UTR	C2U	11	NA	0.6111	+	0	10	0.6111	18	C2U	319745_1	3	OLG
chr1	51224726	51224727	Tmeff2	3UTR	C2U	14	NA	0.7778	+	0	10	0.7778	18	C2U	18152_1	13	OLG
chr1	51224728	51224729	Tmeff2	3UTR	C2U	3	NA	0.2143	+	0	10	0.2143	14	C2U	704260_1	12	OLG
chr1	51224728	51224729	Tmeff2	3UTR	C2U	3	NA	0.2308	+	0	10	0.2308	13	C2U	623446_1	5	OLG
chr1	51224728	51224729	Tmeff2	3UTR	C2U	3	NA	0.2308	+	0	10	0.2308	13	C2U	721307_1	6	OLG
chr1	51224728	51224729	Tmeff2	3UTR	C2U	3	NA	0.2727	+	0	10	0.2727	11	C2U	875294_1	2	OLG
chr1	51224728	51224729	Tmeff2	3UTR	C2U	8	NA	0.32	+	0	10	0.32	25	C2U	592528_1	2	OLG
chr1	51224728	51224729	Tmeff2	3UTR	C2U	4	NA	0.3333	+	0	10	0.3333	12	C2U	506022_1	3	OLG
chr1	51224728	51224729	Tmeff2	3UTR	C2U	5	NA	0.3571	+	0	10	0.3571	14	C2U	133210_1	2	OLG
chr1	51224728	51224729	Tmeff2	3UTR	C2U	8	NA	0.4	+	0	10	0.4	20	C2U	659955_1	2	OLG
chr1	51224728	51224729	Tmeff2	3UTR	C2U	7	NA	0.5385	+	0	10	0.5385	13	C2U	371189_1	5	OLG
chr1	51224728	51224729	Tmeff2	3UTR	C2U	10	NA	0.7143	+	0	10	0.7143	14	C2U	882099_1	12	OLG
chr1	51224728	51224729	Tmeff2	3UTR	C2U	11	NA	0.7857	+	0	10	0.7857	14	C2U	113678_1	2	OLG
chr1	51224740	51224741	Tmeff2	3UTR	C2U	6	NA	0.4286	+	0	10	0.4286	14	C2U	746916_1	2	OLG
chr1	51224756	51224757	Tmeff2	3UTR	C2U	6	NA	0.2727	+	0	10	0.2727	22	C2U	215333_1	6	OLG
chr1	51224756	51224757	Tmeff2	3UTR	C2U	4	NA	0.3333	+	0	10	0.3333	12	C2U	112370_1	6	OLG
chr1	51224756	51224757	Tmeff2	3UTR	C2U	4	NA	0.3636	+	0	10	0.3636	11	C2U	847954_1	6	OLG
chr1	51224756	51224757	Tmeff2	3UTR	C2U	5	NA	0.4167	+	0	10	0.4167	12	C2U	616964_1	6	OLG
chr1	51224758	51224759	Tmeff2	3UTR	C2U	14	NA	0.3256	+	0	10	0.3256	43	C2U	528717_1	7	OLG
chr1	51224758	51224759	Tmeff2	3UTR	C2U	4	NA	0.3333	+	0	10	0.3333	12	C2U	257682_1	7	OLG
chr1	51224758	51224759	Tmeff2	3UTR	C2U	7	NA	0.4118	+	0	10	0.4118	17	C2U	197326_1	7	OLG
chr1	51224758	51224759	Tmeff2	3UTR	C2U	10	NA	0.4762	+	0	10	0.4762	21	C2U	123572_1	7	OLG
chr1	51224758	51224759	Tmeff2	3UTR	C2U	9	NA	0.6923	+	0	10	0.6923	13	C2U	523772_1	6	OLG
chr1	51224758	51224759	Tmeff2	3UTR	C2U	8	NA	0.8	+	0	10	0.8	10	C2U	773047_1	3	OLG
chr1	51224759	51224760	Tmeff2	3UTR	C2U	8	NA	0.2857	+	0	10	0.2857	28	C2U	386473_1	2	OLG
chr1	51224759	51224760	Tmeff2	3UTR	C2U	7	NA	0.4118	+	0	10	0.4118	17	C2U	694429_1	2	OLG
chr1	51224759	51224760	Tmeff2	3UTR	C2U	8	NA	0.5333	+	0	10	0.5333	15	C2U	295386_1	6	OLG
chr1	51224759	51224760	Tmeff2	3UTR	C2U	14	NA	0.5833	+	0	10	0.5833	24	C2U	794148_1	6	OLG
chr1	51224768	51224769	Tmeff2	3UTR	C2U	3	NA	0.2727	+	0	10	0.2727	11	C2U	570555_1	3	OLG
chr1	51224768	51224769	Tmeff2	3UTR	C2U	6	NA	0.4	+	0	10	0.4	15	C2U	204095_1	3	OLG
chr1	51224768	51224769	Tmeff2	3UTR	C2U	10	NA	0.4167	+	0	10	0.4167	24	C2U	7264_1	3	OLG
chr1	51224774	51224775	Tmeff2	3UTR	C2U	6	NA	0.5	+	0	10	0.5	12	C2U	198648_1	7	OLG
chr1	51224774	51224775	Tmeff2	3UTR	C2U	5	NA	0.5	+	0	10	0.5	10	C2U	688914_1	7	OLG
chr1	51224774	51224775	Tmeff2	3UTR	C2U	8	NA	0.5714	+	0	10	0.5714	14	C2U	568150_1	2	OLG
chr1	51224774	51224775	Tmeff2	3UTR	C2U	8	NA	0.8	+	0	10	0.8	10	C2U	473658_1	2	OLG
chr1	51224774	51224775	Tmeff2	3UTR	C2U	15	NA	0.9375	+	0	10	0.9375	16	C2U	186857_1	2	OLG
chr1	51224774	51224775	Tmeff2	3UTR	C2U	11	NA	1	+	0	10	1	11	C2U	103984_1	2	OLG
chr1	51224777	51224778	Tmeff2	3UTR	C2U	6	NA	0.4615	+	0	10	0.4615	13	C2U	605194_1	2	OLG
chr1	51224777	51224778	Tmeff2	3UTR	C2U	7	NA	0.7	+	0	10	0.7	10	C2U	616511_1	2	OLG
chr1	51224825	51224826	Tmeff2	3UTR	C2U	6	NA	0.3	+	0	10	0.3	20	C2U	659955_1	2	OLG
chr1	52178497	52178498	Stat1	CDS	C2U	7	NA	0.4667	+	0	10	0.4667	15	C2U	255317_1	7	OLG
chr1	52178497	52178498	Stat1	CDS	C2U	11	NA	1	+	0	10	1	11	C2U	150784_1	7	OLG
chr1	52178497	52178498	Stat1	CDS	C2U	11	NA	1	+	0	10	1	11	C2U	556432_1	7	OLG
chr1	52179774	52179775	Stat1	CDS	C2U	10	NA	1	+	0	10	1	10	C2U	218658_1	3	OLG
chr1	52179776	52179777	Stat1	CDS	C2U	7	NA	0.3182	+	0	10	0.3182	22	C2U	768249_1	5	OLG
chr1	52179776	52179777	Stat1	CDS	C2U	10	NA	0.5263	+	0	10	0.5263	19	C2U	577881_1	13	OLG
chr1	52193073	52193074	Stat1	CDS	C2U	5	NA	0.5	+	0	10	0.5	10	C2U	12831_1	6	OLG
chr1	52193073	52193074	Stat1	CDS	C2U	8	NA	0.6154	+	0	10	0.6154	13	C2U	432151_1	6	OLG
chr1	52193075	52193076	Stat1	CDS	C2U	11	NA	1	+	0	10	1	11	C2U	158155_1	7	OLG
chr1	52193081	52193082	Stat1	CDS	C2U	7	NA	0.6364	+	0	10	0.6364	11	C2U	854426_1	7	OLG
chr1	52193132	52193133	Stat1	CDS	C2U	5	NA	0.3125	+	0	10	0.3125	16	C2U	261753_1	7	OLG
chr1	52193132	52193133	Stat1	CDS	C2U	8	NA	0.3333	+	0	10	0.3333	24	C2U	74831_1	7	OLG
chr1	52193132	52193133	Stat1	CDS	C2U	9	NA	0.4091	+	0	10	0.4091	22	C2U	557804_1	7	OLG
chr1	52193132	52193133	Stat1	CDS	C2U	8	NA	0.4444	+	0	10	0.4444	18	C2U	729319_1	3	OLG
chr1	52193132	52193133	Stat1	CDS	C2U	7	NA	0.5385	+	0	10	0.5385	13	C2U	347555_1	7	OLG
chr1	52193132	52193133	Stat1	CDS	C2U	11	NA	0.6111	+	0	10	0.6111	18	C2U	414537_1	7	OLG
chr1	52193132	52193133	Stat1	CDS	C2U	14	NA	1	+	0	10	1	14	C2U	380610_1	7	OLG
chr1	52193132	52193133	Stat1	CDS	C2U	13	NA	1	+	0	10	1	13	C2U	765833_1	13	OLG
chr1	52193133	52193134	Stat1	CDS	C2U	10	NA	0.9091	+	0	10	0.9091	11	C2U	343531_1	7	OLG
chr1	52193133	52193134	Stat1	CDS	C2U	10	NA	1	+	0	10	1	10	C2U	324222_1	7	OLG
chr1	52193134	52193135	Stat1	CDS	C2U	7	NA	0.3333	+	0	10	0.3333	21	C2U	305957_1	7	OLG
chr1	52193134	52193135	Stat1	CDS	C2U	6	NA	0.3529	+	0	10	0.3529	17	C2U	222807_1	7	OLG
chr1	52193134	52193135	Stat1	CDS	C2U	13	NA	1	+	0	10	1	13	C2U	595414_1	6	OLG
chr1	52193134	52193135	Stat1	CDS	C2U	11	NA	1	+	0	10	1	11	C2U	697384_1	6	OLG
chr1	52193135	52193136	Stat1	CDS	C2U	4	NA	0.3077	+	0	10	0.3077	13	C2U	615164_1	3	OLG
chr1	52193135	52193136	Stat1	CDS	C2U	8	NA	0.5333	+	0	10	0.5333	15	C2U	158964_1	3	OLG
chr1	52193151	52193152	Stat1	CDS	C2U	9	NA	0.6	+	0	10	0.6	15	C2U	588896_1	7	OLG
chr1	52194152	52194153	Stat1	CDS	C2U	14	NA	0.56	+	0	10	0.56	25	C2U	461382_1	7	OLG
chr1	52194171	52194172	Stat1	CDS	C2U	10	NA	1	+	0	10	1	10	C2U	808301_1	13	OLG
chr1	52198906	52198907	Stat1	3UTR	C2U	8	NA	0.6667	+	0	10	0.6667	12	C2U	186246_1	3	OLG
chr1	52198920	52198921	Stat1	3UTR	C2U	13	NA	0.4062	+	0	10	0.4062	32	C2U	78486_1	6	OLG
chr1	52198920	52198921	Stat1	3UTR	C2U	8	NA	0.7273	+	0	10	0.7273	11	C2U	570982_1	6	OLG
chr1	52198920	52198921	Stat1	3UTR	C2U	9	NA	0.8182	+	0	10	0.8182	11	C2U	304349_1	3	OLG
chr1	52199027	52199028	Stat1	3UTR	C2U	8	NA	0.7273	+	0	10	0.7273	11	C2U	376736_1	13	OLG
chr1	52199882	52199883	Stat1	3UTR	C2U	5	NA	0.2941	+	0	10	0.2941	17	C2U	229521_1	5	OLG
chr1	52199882	52199883	Stat1	3UTR	C2U	11	NA	0.3929	+	0	10	0.3929	28	C2U	405319_1	12	OLG
chr1	52199882	52199883	Stat1	3UTR	C2U	8	NA	0.4	+	0	10	0.4	20	C2U	14832_1	12	OLG
chr1	52199882	52199883	Stat1	3UTR	C2U	6	NA	0.4	+	0	10	0.4	15	C2U	587894_1	12	OLG
chr1	52199882	52199883	Stat1	3UTR	C2U	7	NA	0.4375	+	0	10	0.4375	16	C2U	802806_1	3	OLG
chr1	52199882	52199883	Stat1	3UTR	C2U	5	NA	0.4545	+	0	10	0.4545	11	C2U	36651_1	3	OLG
chr1	52199882	52199883	Stat1	3UTR	C2U	5	NA	0.4545	+	0	10	0.4545	11	C2U	559342_1	3	OLG
chr1	52199882	52199883	Stat1	3UTR	C2U	5	NA	0.4545	+	0	10	0.4545	11	C2U	810520_1	2	OLG
chr1	52199882	52199883	Stat1	3UTR	C2U	6	NA	0.4615	+	0	10	0.4615	13	C2U	489018_1	2	OLG
chr1	52199882	52199883	Stat1	3UTR	C2U	10	NA	0.4762	+	0	10	0.4762	21	C2U	332224_1	3	OLG
chr1	52199882	52199883	Stat1	3UTR	C2U	9	NA	0.5	+	0	10	0.5	18	C2U	84795_1	3	OLG
chr1	52199882	52199883	Stat1	3UTR	C2U	10	NA	0.5263	+	0	10	0.5263	19	C2U	687536_1	7	OLG
chr1	52199882	52199883	Stat1	3UTR	C2U	6	NA	0.5455	+	0	10	0.5455	11	C2U	110076_1	7	OLG
chr1	52199882	52199883	Stat1	3UTR	C2U	6	NA	0.5455	+	0	10	0.5455	11	C2U	374491_1	2	OLG
chr1	52199882	52199883	Stat1	3UTR	C2U	7	NA	0.5833	+	0	10	0.5833	12	C2U	293030_1	3	OLG
chr1	52199882	52199883	Stat1	3UTR	C2U	7	NA	0.5833	+	0	10	0.5833	12	C2U	443849_1	3	OLG
chr1	52199882	52199883	Stat1	3UTR	C2U	9	NA	0.6	+	0	10	0.6	15	C2U	15279_1	7	OLG
chr1	52199882	52199883	Stat1	3UTR	C2U	9	NA	0.6	+	0	10	0.6	15	C2U	773047_1	3	OLG
chr1	52199882	52199883	Stat1	3UTR	C2U	9	NA	0.6429	+	0	10	0.6429	14	C2U	528717_1	7	OLG
chr1	52199882	52199883	Stat1	3UTR	C2U	11	NA	0.6471	+	0	10	0.6471	17	C2U	70312_1	7	OLG
chr1	52199882	52199883	Stat1	3UTR	C2U	11	NA	0.7333	+	0	10	0.7333	15	C2U	481108_1	6	OLG
chr1	52199882	52199883	Stat1	3UTR	C2U	11	NA	0.7857	+	0	10	0.7857	14	C2U	822146_1	12	OLG
chr1	52199882	52199883	Stat1	3UTR	C2U	8	NA	0.8	+	0	10	0.8	10	C2U	565087_1	7	OLG
chr1	52199882	52199883	Stat1	3UTR	C2U	13	NA	0.8667	+	0	10	0.8667	15	C2U	572729_1	7	OLG
chr1	52199882	52199883	Stat1	3UTR	C2U	10	NA	0.9091	+	0	10	0.9091	11	C2U	477285_1	3	OLG
chr1	52199882	52199883	Stat1	3UTR	C2U	12	NA	1	+	0	10	1	12	C2U	201736_1	6	OLG
chr1	52199882	52199883	Stat1	3UTR	C2U	10	NA	1	+	0	10	1	10	C2U	231486_1	5	OLG
chr1	52199882	52199883	Stat1	3UTR	C2U	10	NA	1	+	0	10	1	10	C2U	44375_1	6	OLG
chr1	52199882	52199883	Stat1	3UTR	C2U	10	NA	1	+	0	10	1	10	C2U	444846_1	7	OLG
chr1	52199882	52199883	Stat1	3UTR	C2U	10	NA	1	+	0	10	1	10	C2U	575898_1	3	OLG
chr1	52199882	52199883	Stat1	3UTR	C2U	13	NA	1	+	0	10	1	13	C2U	827813_1	3	OLG
chr1	52199882	52199883	Stat1	3UTR	C2U	10	NA	1	+	0	10	1	10	C2U	846112_1	2	OLG
chr1	52199883	52199884	Stat1	3UTR	C2U	11	NA	0.3793	+	0	10	0.3793	29	C2U	338258_1	7	OLG
chr1	52199883	52199884	Stat1	3UTR	C2U	5	NA	0.4545	+	0	10	0.4545	11	C2U	124173_1	7	OLG
chr1	52199883	52199884	Stat1	3UTR	C2U	7	NA	0.4667	+	0	10	0.4667	15	C2U	242291_1	7	OLG
chr1	52199883	52199884	Stat1	3UTR	C2U	6	NA	0.5	+	0	10	0.5	12	C2U	154271_1	12	OLG
chr1	52199883	52199884	Stat1	3UTR	C2U	5	NA	0.5	+	0	10	0.5	10	C2U	563001_1	2	OLG
chr1	52199883	52199884	Stat1	3UTR	C2U	9	NA	0.5294	+	0	10	0.5294	17	C2U	810965_1	7	OLG
chr1	52199883	52199884	Stat1	3UTR	C2U	8	NA	0.5333	+	0	10	0.5333	15	C2U	803589_1	3	OLG
chr1	52199883	52199884	Stat1	3UTR	C2U	8	NA	0.6154	+	0	10	0.6154	13	C2U	191199_1	7	OLG
chr1	52199883	52199884	Stat1	3UTR	C2U	8	NA	0.6154	+	0	10	0.6154	13	C2U	84831_1	7	OLG
chr1	52199883	52199884	Stat1	3UTR	C2U	7	NA	0.6364	+	0	10	0.6364	11	C2U	507081_1	7	OLG
chr1	52199883	52199884	Stat1	3UTR	C2U	13	NA	0.7222	+	0	10	0.7222	18	C2U	822010_1	7	OLG
chr1	52199883	52199884	Stat1	3UTR	C2U	12	NA	0.75	+	0	10	0.75	16	C2U	101650_1	2	OLG
chr1	52199883	52199884	Stat1	3UTR	C2U	8	NA	0.8	+	0	10	0.8	10	C2U	565087_1	7	OLG
chr1	52199883	52199884	Stat1	3UTR	C2U	12	NA	1	+	0	10	1	12	C2U	307206_1	3	OLG
chr1	52199883	52199884	Stat1	3UTR	C2U	11	NA	1	+	0	10	1	11	C2U	333713_1	7	OLG
chr1	52199887	52199888	Stat1	3UTR	C2U	3	NA	0.2727	+	0	10	0.2727	11	C2U	447244_1	12	OLG
chr1	52199887	52199888	Stat1	3UTR	C2U	5	NA	0.5	+	0	10	0.5	10	C2U	137682_1	3	OLG
chr1	52199887	52199888	Stat1	3UTR	C2U	6	NA	0.5	+	0	10	0.5	12	C2U	622143_1	5	OLG
chr1	52199887	52199888	Stat1	3UTR	C2U	10	NA	0.5556	+	0	10	0.5556	18	C2U	791081_1	7	OLG
chr1	52199887	52199888	Stat1	3UTR	C2U	9	NA	0.5625	+	0	10	0.5625	16	C2U	255813_1	5	OLG
chr1	52199887	52199888	Stat1	3UTR	C2U	9	NA	0.5625	+	0	10	0.5625	16	C2U	323671_1	3	OLG
chr1	52199887	52199888	Stat1	3UTR	C2U	10	NA	0.6667	+	0	10	0.6667	15	C2U	147613_1	7	OLG
chr1	52199887	52199888	Stat1	3UTR	C2U	10	NA	0.6667	+	0	10	0.6667	15	C2U	873425_1	12	OLG
chr1	52199887	52199888	Stat1	3UTR	C2U	10	NA	0.8333	+	0	10	0.8333	12	C2U	281523_1	7	OLG
chr1	52199887	52199888	Stat1	3UTR	C2U	9	NA	0.9	+	0	10	0.9	10	C2U	251506_1	12	OLG
chr1	52199887	52199888	Stat1	3UTR	C2U	12	NA	1	+	0	10	1	12	C2U	414471_1	5	OLG
chr1	52199888	52199889	Stat1	3UTR	C2U	14	NA	1	+	0	10	1	14	C2U	193644_1	7	OLG
chr1	52199909	52199910	Stat1	3UTR	C2U	11	NA	1	+	0	10	1	11	C2U	103609_1	3	OLG
chr1	52199914	52199915	Stat1	3UTR	C2U	7	NA	0.7	+	0	10	0.7	10	C2U	785465_1	6	OLG
chr1	52199949	52199950	Stat1	3UTR	C2U	3	NA	0.1875	+	0	10	0.1875	16	C2U	590069_1	12	OLG
chr1	52199949	52199950	Stat1	3UTR	C2U	5	NA	0.2778	+	0	10	0.2778	18	C2U	844668_1	2	OLG
chr1	52199949	52199950	Stat1	3UTR	C2U	4	NA	0.4	+	0	10	0.4	10	C2U	254118_1	2	OLG
chr1	52199949	52199950	Stat1	3UTR	C2U	6	NA	0.4615	+	0	10	0.4615	13	C2U	158783_1	2	OLG
chr1	52199949	52199950	Stat1	3UTR	C2U	6	NA	0.6	+	0	10	0.6	10	C2U	206889_1	13	OLG
chr1	52199949	52199950	Stat1	3UTR	C2U	9	NA	0.6	+	0	10	0.6	15	C2U	501581_1	7	OLG
chr1	52199949	52199950	Stat1	3UTR	C2U	12	NA	0.8571	+	0	10	0.8571	14	C2U	869926_1	7	OLG
chr1	52199950	52199951	Stat1	3UTR	C2U	6	NA	0.4615	+	0	10	0.4615	13	C2U	78082_1	3	OLG
chr1	52199950	52199951	Stat1	3UTR	C2U	7	NA	0.5	+	0	10	0.5	14	C2U	485605_1	6	OLG
chr1	52199950	52199951	Stat1	3UTR	C2U	5	NA	0.5	+	0	10	0.5	10	C2U	812860_1	6	OLG
chr1	52199950	52199951	Stat1	3UTR	C2U	9	NA	0.6923	+	0	10	0.6923	13	C2U	207898_1	6	OLG
chr1	52199950	52199951	Stat1	3UTR	C2U	8	NA	0.7273	+	0	10	0.7273	11	C2U	822901_1	7	OLG
chr1	52200007	52200008	Stat1	3UTR	C2U	2	NA	0.2	+	0	10	0.2	10	C2U	78486_1	6	OLG
chr1	52200007	52200008	Stat1	3UTR	C2U	3	NA	0.2727	+	0	10	0.2727	11	C2U	785465_1	6	OLG
chr1	52200007	52200008	Stat1	3UTR	C2U	7	NA	0.28	+	0	10	0.28	25	C2U	224885_1	6	OLG
chr1	52200007	52200008	Stat1	3UTR	C2U	5	NA	0.2941	+	0	10	0.2941	17	C2U	565662_1	3	OLG
chr1	52200007	52200008	Stat1	3UTR	C2U	6	NA	0.4286	+	0	10	0.4286	14	C2U	848075_1	6	OLG
chr1	52200007	52200008	Stat1	3UTR	C2U	10	NA	0.4762	+	0	10	0.4762	21	C2U	103294_1	3	OLG
chr1	52200007	52200008	Stat1	3UTR	C2U	6	NA	0.5	+	0	10	0.5	12	C2U	377617_1	7	OLG
chr1	52200007	52200008	Stat1	3UTR	C2U	11	NA	0.5238	+	0	10	0.5238	21	C2U	576031_1	6	OLG
chr1	52200007	52200008	Stat1	3UTR	C2U	14	NA	0.6087	+	0	10	0.6087	23	C2U	662771_1	6	OLG
chr1	52200007	52200008	Stat1	3UTR	C2U	12	NA	0.7059	+	0	10	0.7059	17	C2U	307206_1	3	OLG
chr1	52200007	52200008	Stat1	3UTR	C2U	10	NA	1	+	0	10	1	10	C2U	347554_1	3	OLG
chr1	52200017	52200018	Stat1	3UTR	C2U	5	NA	0.25	+	0	10	0.25	20	C2U	400126_1	2	OLG
chr1	52200017	52200018	Stat1	3UTR	C2U	5	NA	0.3846	+	0	10	0.3846	13	C2U	263524_1	2	OLG
chr1	52200017	52200018	Stat1	3UTR	C2U	5	NA	0.4545	+	0	10	0.4545	11	C2U	786395_1	2	OLG
chr1	52200017	52200018	Stat1	3UTR	C2U	6	NA	0.5455	+	0	10	0.5455	11	C2U	450508_1	13	OLG
chr1	52200017	52200018	Stat1	3UTR	C2U	7	NA	0.6364	+	0	10	0.6364	11	C2U	867991_1	2	OLG
chr1	52202915	52202916	Gls	3UTR	C2U	12	NA	0.5714	-	0	10	0.5714	21	C2U	512603_1	2	OLG
chr1	52695789	52695790	Mfsd6	3UTR	C2U	11	NA	0.5789	-	0	10	0.5789	19	C2U	44983_1	6	OLG
chr1	52696875	52696876	Mfsd6	3UTR	C2U	10	NA	1	-	0	10	1	10	C2U	560808_1	3	OLG
chr1	52696880	52696881	Mfsd6	3UTR	C2U	19	NA	1	-	0	10	1	19	C2U	238738_1	2	OLG
chr1	52828926	52828927	Inpp1	CDS	C2U	14	NA	1	-	0	10	1	14	C2U	305957_1	7	OLG
chr1	52828926	52828927	Inpp1	CDS	C2U	11	NA	1	-	0	10	1	11	C2U	84831_1	7	OLG
chr1	55120232	55120233	Hspd1	CDS	C2U	11	NA	0.55	-	0	10	0.55	20	C2U	628188_1	7	OLG
chr1	55120833	55120834	Hspd1	CDS	C2U	12	NA	1	-	0	10	1	12	C2U	848239_1	2	OLG
chr1	55128247	55128248	Hspe1	CDS	C2U	13	NA	0.8125	+	0	10	0.8125	16	C2U	13112_1	13	OLG
chr1	55128285	55128286	Hspe1	CDS	C2U	11	NA	0.8462	+	0	10	0.8462	13	C2U	454646_1	6	OLG
chr1	55128285	55128286	Hspe1	CDS	C2U	13	NA	0.8667	+	0	10	0.8667	15	C2U	166415_1	13	OLG
chr1	55128285	55128286	Hspe1	CDS	C2U	17	NA	1	+	0	10	1	17	C2U	304035_1	6	OLG
chr1	55128285	55128286	Hspe1	CDS	C2U	13	NA	1	+	0	10	1	13	C2U	772870_1	6	OLG
chr1	55128285	55128286	Hspe1	CDS	C2U	10	NA	1	+	0	10	1	10	C2U	846604_1	6	OLG
chr1	55128286	55128287	Hspe1	CDS	C2U	5	NA	0.4545	+	0	10	0.4545	11	C2U	348434_1	5	OLG
chr1	55128286	55128287	Hspe1	CDS	C2U	8	NA	0.5	+	0	10	0.5	16	C2U	251018_1	5	OLG
chr1	55128286	55128287	Hspe1	CDS	C2U	8	NA	0.6154	+	0	10	0.6154	13	C2U	303029_1	5	OLG
chr1	55128286	55128287	Hspe1	CDS	C2U	13	NA	0.8667	+	0	10	0.8667	15	C2U	166415_1	13	OLG
chr1	55128317	55128318	Hspe1	CDS	C2U	9	NA	0.45	+	0	10	0.45	20	C2U	797714_1	7	OLG
chr1	55128357	55128358	Hspe1	CDS	C2U	7	NA	0.35	+	0	10	0.35	20	C2U	760240_1	13	OLG
chr1	55128357	55128358	Hspe1	CDS	C2U	4	NA	0.3636	+	0	10	0.3636	11	C2U	585636_1	7	OLG
chr1	55128357	55128358	Hspe1	CDS	C2U	9	NA	0.4091	+	0	10	0.4091	22	C2U	180046_1	7	OLG
chr1	55128357	55128358	Hspe1	CDS	C2U	7	NA	0.4375	+	0	10	0.4375	16	C2U	638695_1	7	OLG
chr1	55128357	55128358	Hspe1	CDS	C2U	5	NA	0.4545	+	0	10	0.4545	11	C2U	838413_1	13	OLG
chr1	55128357	55128358	Hspe1	CDS	C2U	6	NA	0.5	+	0	10	0.5	12	C2U	273499_1	12	OLG
chr1	55128357	55128358	Hspe1	CDS	C2U	6	NA	0.5	+	0	10	0.5	12	C2U	435060_1	7	OLG
chr1	55128357	55128358	Hspe1	CDS	C2U	8	NA	0.5	+	0	10	0.5	16	C2U	657217_1	13	OLG
chr1	55128357	55128358	Hspe1	CDS	C2U	9	NA	0.5	+	0	10	0.5	18	C2U	668946_1	13	OLG
chr1	55128357	55128358	Hspe1	CDS	C2U	6	NA	0.5	+	0	10	0.5	12	C2U	847040_1	7	OLG
chr1	55128357	55128358	Hspe1	CDS	C2U	9	NA	0.75	+	0	10	0.75	12	C2U	363174_1	7	OLG
chr1	55129891	55129892	Hspe1	CDS	C2U	3	NA	0.25	+	0	10	0.25	12	C2U	326735_1	2	OLG
chr1	55129916	55129917	Hspe1	CDS	C2U	4	NA	0.3077	+	0	10	0.3077	13	C2U	129819_1	13	OLG
chr1	55129921	55129922	Hspe1	CDS	C2U	7	NA	0.5	+	0	10	0.5	14	C2U	838413_1	13	OLG
chr1	55129921	55129922	Hspe1	CDS	C2U	8	NA	0.5333	+	0	10	0.5333	15	C2U	292341_1	13	OLG
chr1	55735546	55735547	Plcl1	CDS	C2U	13	NA	1	+	0	10	1	13	C2U	271838_1	2	OLG
chr1	55735546	55735547	Plcl1	CDS	C2U	14	NA	1	+	0	10	1	14	C2U	662675_1	2	OLG
chr1	55790917	55790918	Plcl1	3UTR	C2U	8	NA	0.7273	+	0	10	0.7273	11	C2U	302426_1	2	OLG
chr1	55790917	55790918	Plcl1	3UTR	C2U	9	NA	0.8182	+	0	10	0.8182	11	C2U	309489_1	2	OLG
chr1	58446370	58446371	Bzw1	3UTR	C2U	9	NA	0.6923	+	0	10	0.6923	13	C2U	182908_1	2	OLG
chr1	58451308	58451309	Clk1	3UTR	C2U	7	NA	0.2593	-	0	10	0.2593	27	C2U	878672_1	13	OLG
chr1	58451308	58451309	Clk1	3UTR	C2U	6	NA	0.4615	-	0	10	0.4615	13	C2U	573691_1	2	OLG
chr1	58451372	58451373	Clk1	CDS	C2U	4	NA	0.2222	-	0	10	0.2222	18	C2U	419332_1	12	OLG
chr1	58451372	58451373	Clk1	CDS	C2U	13	NA	1	-	0	10	1	13	C2U	101650_1	2	OLG
chr1	58451372	58451373	Clk1	CDS	C2U	13	NA	1	-	0	10	1	13	C2U	362935_1	2	OLG
chr1	58451374	58451375	Clk1	CDS	C2U	9	NA	0.4737	-	0	10	0.4737	19	C2U	878672_1	13	OLG
chr1	58451374	58451375	Clk1	CDS	C2U	14	NA	0.56	-	0	10	0.56	25	C2U	649833_1	5	OLG
chr1	58451374	58451375	Clk1	CDS	C2U	7	NA	0.7	-	0	10	0.7	10	C2U	765316_1	13	OLG
chr1	58451374	58451375	Clk1	CDS	C2U	10	NA	0.7692	-	0	10	0.7692	13	C2U	863904_1	6	OLG
chr1	58451375	58451376	Clk1	CDS	C2U	3	NA	0.3	-	0	10	0.3	10	C2U	849136_1	2	OLG
chr1	58451375	58451376	Clk1	CDS	C2U	4	NA	0.4	-	0	10	0.4	10	C2U	771063_1	2	OLG
chr1	58451375	58451376	Clk1	CDS	C2U	7	NA	0.4375	-	0	10	0.4375	16	C2U	40695_1	5	OLG
chr1	58451375	58451376	Clk1	CDS	C2U	7	NA	0.7	-	0	10	0.7	10	C2U	680355_1	2	OLG
chr1	58451375	58451376	Clk1	CDS	C2U	11	NA	1	-	0	10	1	11	C2U	740296_1	2	OLG
chr1	58451376	58451377	Clk1	CDS	C2U	5	NA	0.3125	-	0	10	0.3125	16	C2U	663751_1	7	OLG
chr1	58451376	58451377	Clk1	CDS	C2U	5	NA	0.3333	-	0	10	0.3333	15	C2U	875260_1	13	OLG
chr1	58451376	58451377	Clk1	CDS	C2U	12	NA	0.4444	-	0	10	0.4444	27	C2U	137781_1	5	OLG
chr1	58451376	58451377	Clk1	CDS	C2U	6	NA	0.5	-	0	10	0.5	12	C2U	51161_1	7	OLG
chr1	58451376	58451377	Clk1	CDS	C2U	6	NA	0.6	-	0	10	0.6	10	C2U	587351_1	13	OLG
chr1	58451376	58451377	Clk1	CDS	C2U	11	NA	0.7857	-	0	10	0.7857	14	C2U	174128_1	2	OLG
chr1	58451376	58451377	Clk1	CDS	C2U	8	NA	0.8	-	0	10	0.8	10	C2U	578681_1	5	OLG
chr1	58451376	58451377	Clk1	CDS	C2U	9	NA	0.8182	-	0	10	0.8182	11	C2U	13391_1	2	OLG
chr1	58451376	58451377	Clk1	CDS	C2U	9	NA	0.9	-	0	10	0.9	10	C2U	445734_1	2	OLG
chr1	58451376	58451377	Clk1	CDS	C2U	15	NA	1	-	0	10	1	15	C2U	31651_1	13	OLG
chr1	58451376	58451377	Clk1	CDS	C2U	12	NA	1	-	0	10	1	12	C2U	475640_1	2	OLG
chr1	58451376	58451377	Clk1	CDS	C2U	14	NA	1	-	0	10	1	14	C2U	783175_1	7	OLG
chr1	58451376	58451377	Clk1	CDS	C2U	10	NA	1	-	0	10	1	10	C2U	98449_1	2	OLG
chr1	58451421	58451422	Clk1	CDS	C2U	2	NA	0.1429	-	0	10	0.1429	14	C2U	694821_1	5	OLG
chr1	58451421	58451422	Clk1	CDS	C2U	3	NA	0.25	-	0	10	0.25	12	C2U	348434_1	5	OLG
chr1	58451425	58451426	Clk1	CDS	C2U	7	NA	0.4118	-	0	10	0.4118	17	C2U	679907_1	3	OLG
chr1	58451825	58451826	Clk1	CDS	C2U	18	NA	0.9474	-	0	10	0.9474	19	C2U	16706_1	2	OLG
chr1	58630328	58630329	Ndufb3	CDS	C2U	10	NA	1	+	0	10	1	10	C2U	139130_1	6	OLG
chr1	58630406	58630407	Ndufb3	CDS	C2U	7	NA	0.3182	+	0	10	0.3182	22	C2U	790391_1	6	OLG
chr1	58634831	58634832	Ndufb3	CDS	C2U	15	NA	1	+	0	10	1	15	C2U	226712_1	3	OLG
chr1	59140257	59140258	Tmem237	3UTR	C2U	13	NA	1	-	0	10	1	13	C2U	137781_1	5	OLG
chr1	59916410	59916411	Bmpr2	3UTR	C2U	10	NA	0.7143	+	0	10	0.7143	14	C2U	6628_1	6	OLG
chr1	60022959	60022960	Fam117b	3UTR	C2U	13	NA	1	+	0	10	1	13	C2U	717589_1	5	OLG
chr1	60024245	60024246	Fam117b	3UTR	C2U	11	NA	1	+	0	10	1	11	C2U	1335_1	3	OLG
chr1	60024327	60024328	Fam117b	3UTR	C2U	6	NA	0.5	+	0	10	0.5	12	C2U	374013_1	3	OLG
chr1	60024327	60024328	Fam117b	3UTR	C2U	12	NA	1	+	0	10	1	12	C2U	250842_1	3	OLG
chr1	60518335	60518336	Abi2	3UTR	C2U	12	NA	1	+	0	10	1	12	C2U	564696_1	2	OLG
chr1	63218011	63218012	Eef1b2	CDS	C2U	9	NA	0.8182	+	0	10	0.8182	11	C2U	97723_1	12	OLG
chr1	63218412	63218413	Eef1b2	CDS	C2U	10	NA	0.6667	+	0	10	0.6667	15	C2U	263851_1	6	OLG
chr1	63218412	63218413	Eef1b2	CDS	C2U	7	NA	0.7	+	0	10	0.7	10	C2U	101252_1	6	OLG
chr1	63218480	63218481	Eef1b2	CDS	C2U	12	NA	0.2222	+	0	10	0.2222	54	C2U	878672_1	13	OLG
chr1	63218504	63218505	Eef1b2	CDS	C2U	4	NA	0.2667	+	0	10	0.2667	15	C2U	340231_1	6	OLG
chr1	63218504	63218505	Eef1b2	CDS	C2U	8	NA	0.2963	+	0	10	0.2963	27	C2U	349109_1	12	OLG
chr1	63218504	63218505	Eef1b2	CDS	C2U	8	NA	0.3077	+	0	10	0.3077	26	C2U	90370_1	12	OLG
chr1	63218504	63218505	Eef1b2	CDS	C2U	5	NA	0.3333	+	0	10	0.3333	15	C2U	115066_1	12	OLG
chr1	63218504	63218505	Eef1b2	CDS	C2U	9	NA	0.3333	+	0	10	0.3333	27	C2U	227686_1	6	OLG
chr1	63218504	63218505	Eef1b2	CDS	C2U	7	NA	0.3333	+	0	10	0.3333	21	C2U	316587_1	7	OLG
chr1	63218504	63218505	Eef1b2	CDS	C2U	12	NA	0.3333	+	0	10	0.3333	36	C2U	66232_1	13	OLG
chr1	63218504	63218505	Eef1b2	CDS	C2U	7	NA	0.3333	+	0	10	0.3333	21	C2U	849159_1	13	OLG
chr1	63218504	63218505	Eef1b2	CDS	C2U	16	NA	0.4103	+	0	10	0.4103	39	C2U	441578_1	7	OLG
chr1	63218504	63218505	Eef1b2	CDS	C2U	9	NA	0.4737	+	0	10	0.4737	19	C2U	582958_1	7	OLG
chr1	63218504	63218505	Eef1b2	CDS	C2U	10	NA	0.5556	+	0	10	0.5556	18	C2U	20397_1	6	OLG
chr1	63218504	63218505	Eef1b2	CDS	C2U	10	NA	0.7143	+	0	10	0.7143	14	C2U	759132_1	12	OLG
chr1	63218504	63218505	Eef1b2	CDS	C2U	11	NA	0.9167	+	0	10	0.9167	12	C2U	198389_1	7	OLG
chr1	63218508	63218509	Eef1b2	CDS	C2U	5	NA	0.2273	+	0	10	0.2273	22	C2U	754495_1	13	OLG
chr1	63218508	63218509	Eef1b2	CDS	C2U	4	NA	0.3636	+	0	10	0.3636	11	C2U	821986_1	13	OLG
chr1	63218515	63218516	Eef1b2	CDS	C2U	9	NA	0.4286	+	0	10	0.4286	21	C2U	167821_1	6	OLG
chr1	63218627	63218628	Eef1b2	CDS	C2U	3	NA	0.3	+	0	10	0.3	10	C2U	250936_1	3	OLG
chr1	63218627	63218628	Eef1b2	CDS	C2U	8	NA	0.5714	+	0	10	0.5714	14	C2U	595010_1	3	OLG
chr1	63218715	63218716	Eef1b2	CDS	C2U	6	NA	0.4	+	0	10	0.4	15	C2U	450508_1	13	OLG
chr1	63218715	63218716	Eef1b2	CDS	C2U	7	NA	0.4375	+	0	10	0.4375	16	C2U	837644_1	13	OLG
chr1	63218715	63218716	Eef1b2	CDS	C2U	9	NA	0.75	+	0	10	0.75	12	C2U	419210_1	13	OLG
chr1	65197901	65197902	Idh1	3UTR	C2U	6	NA	0.2857	-	0	10	0.2857	21	C2U	818894_1	12	OLG
chr1	65197901	65197902	Idh1	3UTR	C2U	6	NA	0.4615	-	0	10	0.4615	13	C2U	590069_1	12	OLG
chr1	65197984	65197985	Idh1	3UTR	C2U	2	NA	0.2	-	0	10	0.2	10	C2U	818894_1	12	OLG
chr1	65197984	65197985	Idh1	3UTR	C2U	12	NA	0.6316	-	0	10	0.6316	19	C2U	273499_1	12	OLG
chr1	65197984	65197985	Idh1	3UTR	C2U	12	NA	0.75	-	0	10	0.75	16	C2U	184826_1	6	OLG
chr1	65197985	65197986	Idh1	3UTR	C2U	7	NA	0.5385	-	0	10	0.5385	13	C2U	724025_1	12	OLG
chr1	65197985	65197986	Idh1	3UTR	C2U	9	NA	0.5625	-	0	10	0.5625	16	C2U	733761_1	12	OLG
chr1	68078265	68078266	Erbb4	3UTR	C2U	12	NA	1	-	0	10	1	12	C2U	683815_1	7	OLG
chr1	72750888	72750889	Rpl37a	CDS	C2U	11	NA	1	+	0	10	1	11	C2U	588878_1	13	OLG
chr1	72750889	72750890	Rpl37a	CDS	C2U	11	NA	1	+	0	10	1	11	C2U	588878_1	13	OLG
chr1	74302980	74302981	Arpc2	CDS	C2U	16	NA	1	+	0	10	1	16	C2U	798144_1	13	OLG
chr1	74303520	74303521	Arpc2	CDS	C2U	4	NA	0.2353	+	0	10	0.2353	17	C2U	306232_1	13	OLG
chr1	74303524	74303525	Arpc2	CDS	C2U	10	NA	0.7692	+	0	10	0.7692	13	C2U	163833_1	13	OLG
chr1	74303524	74303525	Arpc2	CDS	C2U	11	NA	0.9167	+	0	10	0.9167	12	C2U	133023_1	13	OLG
chr1	74303524	74303525	Arpc2	CDS	C2U	16	NA	1	+	0	10	1	16	C2U	868030_1	6	OLG
chr1	74303526	74303527	Arpc2	CDS	C2U	11	NA	0.4783	+	0	10	0.4783	23	C2U	807778_1	13	OLG
chr1	74303526	74303527	Arpc2	CDS	C2U	9	NA	0.6	+	0	10	0.6	15	C2U	765833_1	13	OLG
chr1	74303577	74303578	Arpc2	CDS	C2U	7	NA	0.3182	+	0	10	0.3182	22	C2U	188938_1	13	OLG
chr1	74303577	74303578	Arpc2	CDS	C2U	6	NA	0.375	+	0	10	0.375	16	C2U	752933_1	2	OLG
chr1	74303611	74303612	Arpc2	CDS	C2U	3	NA	0.1304	+	0	10	0.1304	23	C2U	588878_1	13	OLG
chr1	74303611	74303612	Arpc2	CDS	C2U	5	NA	0.2273	+	0	10	0.2273	22	C2U	525935_1	13	OLG
chr1	74306946	74306947	Arpc2	CDS	C2U	5	NA	0.2381	+	0	10	0.2381	21	C2U	666595_1	13	OLG
chr1	74307208	74307209	Arpc2	3UTR	C2U	7	NA	0.3684	+	0	10	0.3684	19	C2U	873425_1	12	OLG
chr1	74307208	74307209	Arpc2	3UTR	C2U	10	NA	1	+	0	10	1	10	C2U	347881_1	2	OLG
chr1	74307210	74307211	Arpc2	3UTR	C2U	5	NA	0.3333	+	0	10	0.3333	15	C2U	30175_1	13	OLG
chr1	74307210	74307211	Arpc2	3UTR	C2U	5	NA	0.4545	+	0	10	0.4545	11	C2U	853474_1	13	OLG
chr1	74307210	74307211	Arpc2	3UTR	C2U	9	NA	0.5	+	0	10	0.5	18	C2U	398628_1	13	OLG
chr1	74307211	74307212	Arpc2	3UTR	C2U	9	NA	0.3214	+	0	10	0.3214	28	C2U	626014_1	12	OLG
chr1	74307211	74307212	Arpc2	3UTR	C2U	5	NA	0.4167	+	0	10	0.4167	12	C2U	290480_1	13	OLG
chr1	74307211	74307212	Arpc2	3UTR	C2U	5	NA	0.4545	+	0	10	0.4545	11	C2U	810087_1	13	OLG
chr1	74307211	74307212	Arpc2	3UTR	C2U	8	NA	0.6154	+	0	10	0.6154	13	C2U	675296_1	13	OLG
chr1	74307214	74307215	Arpc2	3UTR	C2U	3	NA	0.3	+	0	10	0.3	10	C2U	188506_1	6	OLG
chr1	74307214	74307215	Arpc2	3UTR	C2U	13	NA	0.5	+	0	10	0.5	26	C2U	424009_1	13	OLG
chr1	74307215	74307216	Arpc2	3UTR	C2U	8	NA	0.6667	+	0	10	0.6667	12	C2U	367905_1	5	OLG
chr1	74307221	74307222	Arpc2	3UTR	C2U	7	NA	0.5833	+	0	10	0.5833	12	C2U	107272_1	13	OLG
chr1	74307225	74307226	Arpc2	3UTR	C2U	12	NA	0.75	+	0	10	0.75	16	C2U	386014_1	7	OLG
chr1	74307247	74307248	Arpc2	3UTR	C2U	5	NA	0.3846	+	0	10	0.3846	13	C2U	323336_1	7	OLG
chr1	74307247	74307248	Arpc2	3UTR	C2U	5	NA	0.4167	+	0	10	0.4167	12	C2U	162630_1	7	OLG
chr1	74307247	74307248	Arpc2	3UTR	C2U	9	NA	0.8182	+	0	10	0.8182	11	C2U	396840_1	7	OLG
chr1	74307247	74307248	Arpc2	3UTR	C2U	12	NA	1	+	0	10	1	12	C2U	743483_1	7	OLG
chr1	74307279	74307280	Arpc2	3UTR	C2U	5	NA	0.2778	+	0	10	0.2778	18	C2U	97481_1	13	OLG
chr1	74319129	74319130	Aamp	3UTR	C2U	4	NA	0.2105	-	0	10	0.2105	19	C2U	648622_1	12	OLG
chr1	74319149	74319150	Aamp	3UTR	C2U	5	NA	0.4545	-	0	10	0.4545	11	C2U	346764_1	12	OLG
chr1	74319149	74319150	Aamp	3UTR	C2U	9	NA	0.9	-	0	10	0.9	10	C2U	661213_1	6	OLG
chr1	74319151	74319152	Aamp	3UTR	C2U	2	NA	0.1667	-	0	10	0.1667	12	C2U	126244_1	7	OLG
chr1	74319151	74319152	Aamp	3UTR	C2U	3	NA	0.1667	-	0	10	0.1667	18	C2U	759684_1	7	OLG
chr1	74319151	74319152	Aamp	3UTR	C2U	6	NA	0.25	-	0	10	0.25	24	C2U	171734_1	7	OLG
chr1	74319151	74319152	Aamp	3UTR	C2U	4	NA	0.25	-	0	10	0.25	16	C2U	386258_1	7	OLG
chr1	74319151	74319152	Aamp	3UTR	C2U	5	NA	0.25	-	0	10	0.25	20	C2U	398549_1	7	OLG
chr1	74319151	74319152	Aamp	3UTR	C2U	3	NA	0.3	-	0	10	0.3	10	C2U	303366_1	7	OLG
chr1	74319151	74319152	Aamp	3UTR	C2U	7	NA	0.35	-	0	10	0.35	20	C2U	827567_1	7	OLG
chr1	74319151	74319152	Aamp	3UTR	C2U	7	NA	0.3684	-	0	10	0.3684	19	C2U	232278_1	6	OLG
chr1	74319151	74319152	Aamp	3UTR	C2U	8	NA	0.4211	-	0	10	0.4211	19	C2U	91307_1	7	OLG
chr1	74319151	74319152	Aamp	3UTR	C2U	5	NA	0.4545	-	0	10	0.4545	11	C2U	213352_1	2	OLG
chr1	74319151	74319152	Aamp	3UTR	C2U	9	NA	0.4737	-	0	10	0.4737	19	C2U	58863_1	6	OLG
chr1	74319151	74319152	Aamp	3UTR	C2U	5	NA	0.5	-	0	10	0.5	10	C2U	777804_1	3	OLG
chr1	74319151	74319152	Aamp	3UTR	C2U	10	NA	0.5263	-	0	10	0.5263	19	C2U	374491_1	2	OLG
chr1	74319151	74319152	Aamp	3UTR	C2U	7	NA	0.5385	-	0	10	0.5385	13	C2U	38889_1	7	OLG
chr1	74319151	74319152	Aamp	3UTR	C2U	8	NA	0.5714	-	0	10	0.5714	14	C2U	137547_1	6	OLG
chr1	74319151	74319152	Aamp	3UTR	C2U	7	NA	0.7	-	0	10	0.7	10	C2U	580445_1	3	OLG
chr1	74319151	74319152	Aamp	3UTR	C2U	9	NA	0.75	-	0	10	0.75	12	C2U	855378_1	6	OLG
chr1	74319151	74319152	Aamp	3UTR	C2U	16	NA	0.7619	-	0	10	0.7619	21	C2U	616911_1	3	OLG
chr1	74319151	74319152	Aamp	3UTR	C2U	8	NA	0.8	-	0	10	0.8	10	C2U	780772_1	2	OLG
chr1	74319151	74319152	Aamp	3UTR	C2U	10	NA	1	-	0	10	1	10	C2U	712861_1	3	OLG
chr1	74319151	74319152	Aamp	3UTR	C2U	13	NA	1	-	0	10	1	13	C2U	789498_1	7	OLG
chr1	74319151	74319152	Aamp	3UTR	C2U	11	NA	1	-	0	10	1	11	C2U	830175_1	6	OLG
chr1	74327473	74327474	Tmbim1	3UTR	C2U	4	NA	0.2667	-	0	10	0.2667	15	C2U	76183_1	5	OLG
chr1	74327473	74327474	Tmbim1	3UTR	C2U	4	NA	0.3333	-	0	10	0.3333	12	C2U	336353_1	5	OLG
chr1	74327473	74327474	Tmbim1	3UTR	C2U	5	NA	0.4545	-	0	10	0.4545	11	C2U	289510_1	5	OLG
chr1	74327478	74327479	Tmbim1	3UTR	C2U	4	NA	0.2353	-	0	10	0.2353	17	C2U	149766_1	6	OLG
chr1	74327499	74327500	Tmbim1	3UTR	C2U	10	NA	0.7692	-	0	10	0.7692	13	C2U	241344_1	5	OLG
chr1	74327505	74327506	Tmbim1	3UTR	C2U	4	NA	0.4	-	0	10	0.4	10	C2U	559391_1	2	OLG
chr1	74327557	74327558	Tmbim1	3UTR	C2U	6	NA	0.3333	-	0	10	0.3333	18	C2U	514110_1	5	OLG
chr1	74327557	74327558	Tmbim1	3UTR	C2U	5	NA	0.3333	-	0	10	0.3333	15	C2U	630381_1	2	OLG
chr1	74327557	74327558	Tmbim1	3UTR	C2U	5	NA	0.3846	-	0	10	0.3846	13	C2U	410427_1	5	OLG
chr1	74327557	74327558	Tmbim1	3UTR	C2U	11	NA	0.7857	-	0	10	0.7857	14	C2U	194288_1	5	OLG
chr1	74327557	74327558	Tmbim1	3UTR	C2U	8	NA	0.8	-	0	10	0.8	10	C2U	180676_1	3	OLG
chr1	74327558	74327559	Tmbim1	3UTR	C2U	6	NA	0.2308	-	0	10	0.2308	26	C2U	846188_1	3	OLG
chr1	74327558	74327559	Tmbim1	3UTR	C2U	11	NA	0.9167	-	0	10	0.9167	12	C2U	175088_1	7	OLG
chr1	74327558	74327559	Tmbim1	3UTR	C2U	14	NA	1	-	0	10	1	14	C2U	287223_1	3	OLG
chr1	74327590	74327591	Tmbim1	3UTR	C2U	6	NA	0.6	-	0	10	0.6	10	C2U	701687_1	6	OLG
chr1	74327603	74327604	Tmbim1	3UTR	C2U	6	NA	0.6	-	0	10	0.6	10	C2U	820398_1	3	OLG
chr1	74327603	74327604	Tmbim1	3UTR	C2U	8	NA	0.6667	-	0	10	0.6667	12	C2U	58511_1	2	OLG
chr1	74327613	74327614	Tmbim1	3UTR	C2U	4	NA	0.3077	-	0	10	0.3077	13	C2U	122196_1	5	OLG
chr1	74327613	74327614	Tmbim1	3UTR	C2U	5	NA	0.4545	-	0	10	0.4545	11	C2U	826889_1	2	OLG
chr1	74327642	74327643	Tmbim1	3UTR	C2U	6	NA	0.6	-	0	10	0.6	10	C2U	284183_1	3	OLG
chr1	74327649	74327650	Tmbim1	3UTR	C2U	6	NA	0.5	-	0	10	0.5	12	C2U	285814_1	7	OLG
chr1	74327649	74327650	Tmbim1	3UTR	C2U	11	NA	1	-	0	10	1	11	C2U	350660_1	2	OLG
chr1	74327684	74327685	Tmbim1	3UTR	C2U	10	NA	0.5	-	0	10	0.5	20	C2U	514998_1	2	OLG
chr1	74435893	74435894	Ctdsp1	3UTR	C2U	9	NA	0.9	+	0	10	0.9	10	C2U	764277_1	2	OLG
chr1	74435898	74435899	Ctdsp1	3UTR	C2U	13	NA	1	+	0	10	1	13	C2U	825450_1	2	OLG
chr1	74776776	74776777	Cyp27a1	CDS	C2U	16	NA	1	+	0	10	1	16	C2U	808270_1	2	OLG
chr1	74776776	74776777	Cyp27a1	CDS	C2U	11	NA	1	+	0	10	1	11	C2U	832814_1	2	OLG
chr1	74776777	74776778	Cyp27a1	CDS	C2U	11	NA	1	+	0	10	1	11	C2U	782274_1	5	OLG
chr1	78676764	78676765	Acsl3	CDS	C2U	13	NA	1	+	0	10	1	13	C2U	432848_1	3	OLG
chr1	78684410	78684411	Acsl3	3UTR	C2U	12	NA	1	+	0	10	1	12	C2U	759132_1	12	OLG
chr1	79772243	79772244	Serpine2	3UTR	C2U	7	NA	0.2692	-	0	10	0.2692	26	C2U	242795_1	13	OLG
chr1	79772243	79772244	Serpine2	3UTR	C2U	10	NA	0.5556	-	0	10	0.5556	18	C2U	539916_1	13	OLG
chr1	79772373	79772374	Serpine2	3UTR	C2U	6	NA	0.24	-	0	10	0.24	25	C2U	610700_1	12	OLG
chr1	79772373	79772374	Serpine2	3UTR	C2U	7	NA	0.3333	-	0	10	0.3333	21	C2U	580088_1	16	OLG
chr1	80244787	80244788	Cul3	3UTR	C2U	10	NA	1	-	0	10	1	10	C2U	590069_1	12	OLG
chr1	80479072	80479073	Dock10	3UTR	C2U	5	NA	0.2778	-	0	10	0.2778	18	C2U	347333_1	13	OLG
chr1	80479114	80479115	Dock10	3UTR	C2U	5	NA	0.2778	-	0	10	0.2778	18	C2U	257450_1	13	OLG
chr1	80479114	80479115	Dock10	3UTR	C2U	6	NA	0.375	-	0	10	0.375	16	C2U	260504_1	12	OLG
chr1	80479114	80479115	Dock10	3UTR	C2U	7	NA	0.4375	-	0	10	0.4375	16	C2U	540661_1	13	OLG
chr1	80479114	80479115	Dock10	3UTR	C2U	10	NA	0.5	-	0	10	0.5	20	C2U	842727_1	13	OLG
chr1	80479114	80479115	Dock10	3UTR	C2U	14	NA	0.5385	-	0	10	0.5385	26	C2U	343473_1	2	OLG
chr1	80479114	80479115	Dock10	3UTR	C2U	7	NA	0.5385	-	0	10	0.5385	13	C2U	744456_1	2	OLG
chr1	80479114	80479115	Dock10	3UTR	C2U	20	NA	0.5405	-	0	10	0.5405	37	C2U	419332_1	12	OLG
chr1	80479114	80479115	Dock10	3UTR	C2U	6	NA	0.5455	-	0	10	0.5455	11	C2U	767070_1	2	OLG
chr1	80479114	80479115	Dock10	3UTR	C2U	13	NA	0.5652	-	0	10	0.5652	23	C2U	438682_1	2	OLG
chr1	80479114	80479115	Dock10	3UTR	C2U	12	NA	0.6316	-	0	10	0.6316	19	C2U	559414_1	2	OLG
chr1	80479114	80479115	Dock10	3UTR	C2U	9	NA	0.6429	-	0	10	0.6429	14	C2U	788597_1	2	OLG
chr1	80479114	80479115	Dock10	3UTR	C2U	15	NA	0.6818	-	0	10	0.6818	22	C2U	285638_1	3	OLG
chr1	80479114	80479115	Dock10	3UTR	C2U	9	NA	0.6923	-	0	10	0.6923	13	C2U	151864_1	2	OLG
chr1	80479114	80479115	Dock10	3UTR	C2U	9	NA	0.6923	-	0	10	0.6923	13	C2U	255035_1	2	OLG
chr1	80479114	80479115	Dock10	3UTR	C2U	7	NA	0.7	-	0	10	0.7	10	C2U	764046_1	6	OLG
chr1	80479114	80479115	Dock10	3UTR	C2U	8	NA	0.7273	-	0	10	0.7273	11	C2U	277736_1	2	OLG
chr1	80479114	80479115	Dock10	3UTR	C2U	11	NA	0.8462	-	0	10	0.8462	13	C2U	361111_1	3	OLG
chr1	80479114	80479115	Dock10	3UTR	C2U	12	NA	0.8571	-	0	10	0.8571	14	C2U	412067_1	2	OLG
chr1	80479114	80479115	Dock10	3UTR	C2U	11	NA	1	-	0	10	1	11	C2U	133192_1	3	OLG
chr1	80479114	80479115	Dock10	3UTR	C2U	15	NA	1	-	0	10	1	15	C2U	179788_1	5	OLG
chr1	80479114	80479115	Dock10	3UTR	C2U	11	NA	1	-	0	10	1	11	C2U	181980_1	2	OLG
chr1	80479114	80479115	Dock10	3UTR	C2U	10	NA	1	-	0	10	1	10	C2U	217330_1	6	OLG
chr1	80479114	80479115	Dock10	3UTR	C2U	10	NA	1	-	0	10	1	10	C2U	320488_1	2	OLG
chr1	80479114	80479115	Dock10	3UTR	C2U	11	NA	1	-	0	10	1	11	C2U	426583_1	6	OLG
chr1	80479114	80479115	Dock10	3UTR	C2U	12	NA	1	-	0	10	1	12	C2U	446376_1	2	OLG
chr1	80479114	80479115	Dock10	3UTR	C2U	12	NA	1	-	0	10	1	12	C2U	48591_1	5	OLG
chr1	80479114	80479115	Dock10	3UTR	C2U	11	NA	1	-	0	10	1	11	C2U	5317_1	5	OLG
chr1	80479114	80479115	Dock10	3UTR	C2U	10	NA	1	-	0	10	1	10	C2U	545570_1	2	OLG
chr1	80479114	80479115	Dock10	3UTR	C2U	14	NA	1	-	0	10	1	14	C2U	722883_1	3	OLG
chr1	80479116	80479117	Dock10	3UTR	C2U	4	NA	0.3333	-	0	10	0.3333	12	C2U	255124_1	2	OLG
chr1	80479116	80479117	Dock10	3UTR	C2U	5	NA	0.3333	-	0	10	0.3333	15	C2U	644536_1	2	OLG
chr1	80479116	80479117	Dock10	3UTR	C2U	5	NA	0.3571	-	0	10	0.3571	14	C2U	618923_1	2	OLG
chr1	80479116	80479117	Dock10	3UTR	C2U	4	NA	0.3636	-	0	10	0.3636	11	C2U	1417_1	2	OLG
chr1	80479116	80479117	Dock10	3UTR	C2U	7	NA	0.3889	-	0	10	0.3889	18	C2U	561685_1	2	OLG
chr1	80479116	80479117	Dock10	3UTR	C2U	12	NA	0.5217	-	0	10	0.5217	23	C2U	552961_1	5	OLG
chr1	80479116	80479117	Dock10	3UTR	C2U	8	NA	0.5333	-	0	10	0.5333	15	C2U	358365_1	2	OLG
chr1	80479116	80479117	Dock10	3UTR	C2U	7	NA	0.5385	-	0	10	0.5385	13	C2U	741097_1	2	OLG
chr1	80479116	80479117	Dock10	3UTR	C2U	12	NA	0.5455	-	0	10	0.5455	22	C2U	182250_1	2	OLG
chr1	80479116	80479117	Dock10	3UTR	C2U	10	NA	0.5556	-	0	10	0.5556	18	C2U	446397_1	13	OLG
chr1	80479116	80479117	Dock10	3UTR	C2U	7	NA	0.5833	-	0	10	0.5833	12	C2U	597335_1	7	OLG
chr1	80479116	80479117	Dock10	3UTR	C2U	10	NA	0.5882	-	0	10	0.5882	17	C2U	18152_1	13	OLG
chr1	80479116	80479117	Dock10	3UTR	C2U	10	NA	0.5882	-	0	10	0.5882	17	C2U	726243_1	5	OLG
chr1	80479116	80479117	Dock10	3UTR	C2U	8	NA	0.6154	-	0	10	0.6154	13	C2U	527879_1	7	OLG
chr1	80479116	80479117	Dock10	3UTR	C2U	9	NA	0.6429	-	0	10	0.6429	14	C2U	808301_1	13	OLG
chr1	80479116	80479117	Dock10	3UTR	C2U	11	NA	0.6471	-	0	10	0.6471	17	C2U	738806_1	2	OLG
chr1	80479116	80479117	Dock10	3UTR	C2U	10	NA	0.6667	-	0	10	0.6667	15	C2U	312207_1	2	OLG
chr1	80479116	80479117	Dock10	3UTR	C2U	7	NA	0.7	-	0	10	0.7	10	C2U	394318_1	13	OLG
chr1	80479116	80479117	Dock10	3UTR	C2U	12	NA	0.7059	-	0	10	0.7059	17	C2U	746952_1	3	OLG
chr1	80479116	80479117	Dock10	3UTR	C2U	18	NA	0.72	-	0	10	0.72	25	C2U	693085_1	2	OLG
chr1	80479116	80479117	Dock10	3UTR	C2U	11	NA	0.7333	-	0	10	0.7333	15	C2U	460106_1	5	OLG
chr1	80479116	80479117	Dock10	3UTR	C2U	13	NA	0.7647	-	0	10	0.7647	17	C2U	777804_1	3	OLG
chr1	80479116	80479117	Dock10	3UTR	C2U	10	NA	0.7692	-	0	10	0.7692	13	C2U	133753_1	5	OLG
chr1	80479116	80479117	Dock10	3UTR	C2U	8	NA	0.8	-	0	10	0.8	10	C2U	775030_1	2	OLG
chr1	80479116	80479117	Dock10	3UTR	C2U	9	NA	0.8182	-	0	10	0.8182	11	C2U	327713_1	3	OLG
chr1	80479116	80479117	Dock10	3UTR	C2U	14	NA	0.8235	-	0	10	0.8235	17	C2U	167498_1	2	OLG
chr1	80479116	80479117	Dock10	3UTR	C2U	12	NA	0.8571	-	0	10	0.8571	14	C2U	696191_1	6	OLG
chr1	80479116	80479117	Dock10	3UTR	C2U	14	NA	0.875	-	0	10	0.875	16	C2U	473401_1	3	OLG
chr1	80479116	80479117	Dock10	3UTR	C2U	13	NA	0.9286	-	0	10	0.9286	14	C2U	391808_1	3	OLG
chr1	80479116	80479117	Dock10	3UTR	C2U	14	NA	0.9333	-	0	10	0.9333	15	C2U	277388_1	2	OLG
chr1	80479116	80479117	Dock10	3UTR	C2U	13	NA	1	-	0	10	1	13	C2U	112256_1	3	OLG
chr1	80479116	80479117	Dock10	3UTR	C2U	11	NA	1	-	0	10	1	11	C2U	202735_1	3	OLG
chr1	80479116	80479117	Dock10	3UTR	C2U	18	NA	1	-	0	10	1	18	C2U	24579_1	3	OLG
chr1	80479116	80479117	Dock10	3UTR	C2U	11	NA	1	-	0	10	1	11	C2U	278895_1	2	OLG
chr1	80479116	80479117	Dock10	3UTR	C2U	13	NA	1	-	0	10	1	13	C2U	288231_1	2	OLG
chr1	80479116	80479117	Dock10	3UTR	C2U	10	NA	1	-	0	10	1	10	C2U	296500_1	6	OLG
chr1	80479116	80479117	Dock10	3UTR	C2U	14	NA	1	-	0	10	1	14	C2U	335407_1	5	OLG
chr1	80479116	80479117	Dock10	3UTR	C2U	13	NA	1	-	0	10	1	13	C2U	345963_1	3	OLG
chr1	80479116	80479117	Dock10	3UTR	C2U	12	NA	1	-	0	10	1	12	C2U	400802_1	3	OLG
chr1	80479116	80479117	Dock10	3UTR	C2U	12	NA	1	-	0	10	1	12	C2U	541702_1	6	OLG
chr1	80479116	80479117	Dock10	3UTR	C2U	18	NA	1	-	0	10	1	18	C2U	542802_1	5	OLG
chr1	80479116	80479117	Dock10	3UTR	C2U	10	NA	1	-	0	10	1	10	C2U	63593_1	3	OLG
chr1	80479116	80479117	Dock10	3UTR	C2U	19	NA	1	-	0	10	1	19	C2U	646865_1	6	OLG
chr1	80479116	80479117	Dock10	3UTR	C2U	10	NA	1	-	0	10	1	10	C2U	824500_1	13	OLG
chr1	80479116	80479117	Dock10	3UTR	C2U	12	NA	1	-	0	10	1	12	C2U	830029_1	5	OLG
chr1	80479116	80479117	Dock10	3UTR	C2U	11	NA	1	-	0	10	1	11	C2U	835000_1	7	OLG
chr1	80479116	80479117	Dock10	3UTR	C2U	12	NA	1	-	0	10	1	12	C2U	850916_1	2	OLG
chr1	80479116	80479117	Dock10	3UTR	C2U	10	NA	1	-	0	10	1	10	C2U	861783_1	3	OLG
chr1	80550189	80550190	Dock10	CDS	C2U	11	NA	1	-	0	10	1	11	C2U	207552_1	3	OLG
chr1	82211067	82211068	Irs1	3UTR	C2U	15	NA	1	-	0	10	1	15	C2U	574803_1	12	OLG
chr1	82729857	82729858	Mff	3UTR	C2U	6	NA	0.6	+	0	10	0.6	10	C2U	424434_1	5	OLG
chr1	82729857	82729858	Mff	3UTR	C2U	11	NA	1	+	0	10	1	11	C2U	152833_1	12	OLG
chr1	82729859	82729860	Mff	3UTR	C2U	10	NA	0.625	+	0	10	0.625	16	C2U	830611_1	6	OLG
chr1	85779161	85779162	Cab39	3UTR	C2U	7	NA	0.5385	+	0	10	0.5385	13	C2U	444846_1	7	OLG
chr1	85836113	85836114	Itm2c	3UTR	C2U	8	NA	0.5333	+	0	10	0.5333	15	C2U	786051_1	13	OLG
chr1	85836116	85836117	Itm2c	3UTR	C2U	11	NA	1	+	0	10	1	11	C2U	24579_1	3	OLG
chr1	85836116	85836117	Itm2c	3UTR	C2U	18	NA	1	+	0	10	1	18	C2U	836050_1	5	OLG
chr1	85836186	85836187	Itm2c	3UTR	C2U	6	NA	0.4	+	0	10	0.4	15	C2U	661314_1	7	OLG
chr1	85836186	85836187	Itm2c	3UTR	C2U	9	NA	0.6429	+	0	10	0.6429	14	C2U	284362_1	7	OLG
chr1	85836190	85836191	Itm2c	3UTR	C2U	5	NA	0.3571	+	0	10	0.3571	14	C2U	385073_1	13	OLG
chr1	85836190	85836191	Itm2c	3UTR	C2U	7	NA	0.4375	+	0	10	0.4375	16	C2U	875260_1	13	OLG
chr1	85836190	85836191	Itm2c	3UTR	C2U	7	NA	0.5833	+	0	10	0.5833	12	C2U	273515_1	2	OLG
chr1	85836190	85836191	Itm2c	3UTR	C2U	6	NA	0.6	+	0	10	0.6	10	C2U	182415_1	13	OLG
chr1	85836190	85836191	Itm2c	3UTR	C2U	12	NA	0.75	+	0	10	0.75	16	C2U	95041_1	2	OLG
chr1	85836190	85836191	Itm2c	3UTR	C2U	10	NA	0.8333	+	0	10	0.8333	12	C2U	802509_1	6	OLG
chr1	85836190	85836191	Itm2c	3UTR	C2U	11	NA	1	+	0	10	1	11	C2U	303029_1	5	OLG
chr1	85836190	85836191	Itm2c	3UTR	C2U	11	NA	1	+	0	10	1	11	C2U	306232_1	13	OLG
chr1	85836190	85836191	Itm2c	3UTR	C2U	10	NA	1	+	0	10	1	10	C2U	527746_1	3	OLG
chr1	85836191	85836192	Itm2c	3UTR	C2U	7	NA	0.3333	+	0	10	0.3333	21	C2U	535185_1	6	OLG
chr1	85836191	85836192	Itm2c	3UTR	C2U	7	NA	0.4375	+	0	10	0.4375	16	C2U	680042_1	3	OLG
chr1	85836191	85836192	Itm2c	3UTR	C2U	10	NA	0.4545	+	0	10	0.4545	22	C2U	501238_1	6	OLG
chr1	85836191	85836192	Itm2c	3UTR	C2U	7	NA	0.5833	+	0	10	0.5833	12	C2U	98113_1	3	OLG
chr1	85836191	85836192	Itm2c	3UTR	C2U	6	NA	0.6	+	0	10	0.6	10	C2U	806698_1	6	OLG
chr1	85836191	85836192	Itm2c	3UTR	C2U	13	NA	1	+	0	10	1	13	C2U	358365_1	2	OLG
chr1	85836191	85836192	Itm2c	3UTR	C2U	10	NA	1	+	0	10	1	10	C2U	873436_1	5	OLG
chr1	85836192	85836193	Itm2c	3UTR	C2U	5	NA	0.3571	+	0	10	0.3571	14	C2U	55502_1	13	OLG
chr1	85836192	85836193	Itm2c	3UTR	C2U	10	NA	1	+	0	10	1	10	C2U	134116_1	6	OLG
chr1	85836192	85836193	Itm2c	3UTR	C2U	13	NA	1	+	0	10	1	13	C2U	839885_1	5	OLG
chr1	85836193	85836194	Itm2c	3UTR	C2U	4	NA	0.2353	+	0	10	0.2353	17	C2U	678459_1	13	OLG
chr1	85836193	85836194	Itm2c	3UTR	C2U	4	NA	0.3333	+	0	10	0.3333	12	C2U	838413_1	13	OLG
chr1	85836193	85836194	Itm2c	3UTR	C2U	6	NA	0.5	+	0	10	0.5	12	C2U	6894_1	6	OLG
chr1	85836193	85836194	Itm2c	3UTR	C2U	7	NA	0.5	+	0	10	0.5	14	C2U	815900_1	6	OLG
chr1	85836193	85836194	Itm2c	3UTR	C2U	7	NA	0.6364	+	0	10	0.6364	11	C2U	670791_1	2	OLG
chr1	85836195	85836196	Itm2c	3UTR	C2U	13	NA	0.5652	+	0	10	0.5652	23	C2U	746783_1	13	OLG
chr1	85836195	85836196	Itm2c	3UTR	C2U	6	NA	0.6	+	0	10	0.6	10	C2U	468548_1	3	OLG
chr1	85836195	85836196	Itm2c	3UTR	C2U	7	NA	0.6364	+	0	10	0.6364	11	C2U	774923_1	7	OLG
chr1	85836195	85836196	Itm2c	3UTR	C2U	9	NA	0.6429	+	0	10	0.6429	14	C2U	258124_1	3	OLG
chr1	85836199	85836200	Itm2c	3UTR	C2U	13	NA	0.3611	+	0	10	0.3611	36	C2U	206889_1	13	OLG
chr1	85836199	85836200	Itm2c	3UTR	C2U	7	NA	0.7	+	0	10	0.7	10	C2U	100701_1	3	OLG
chr1	85836200	85836201	Itm2c	3UTR	C2U	6	NA	0.5	+	0	10	0.5	12	C2U	559066_1	13	OLG
chr1	85836221	85836222	Itm2c	3UTR	C2U	4	NA	0.4	+	0	10	0.4	10	C2U	883478_1	13	OLG
chr1	85836221	85836222	Itm2c	3UTR	C2U	8	NA	0.4211	+	0	10	0.4211	19	C2U	682112_1	2	OLG
chr1	85836221	85836222	Itm2c	3UTR	C2U	8	NA	0.7273	+	0	10	0.7273	11	C2U	158629_1	2	OLG
chr1	85836225	85836226	Itm2c	3UTR	C2U	4	NA	0.3636	+	0	10	0.3636	11	C2U	260544_1	6	OLG
chr1	85836225	85836226	Itm2c	3UTR	C2U	4	NA	0.3636	+	0	10	0.3636	11	C2U	513481_1	6	OLG
chr1	85836225	85836226	Itm2c	3UTR	C2U	10	NA	0.625	+	0	10	0.625	16	C2U	412067_1	2	OLG
chr1	85836243	85836244	Itm2c	3UTR	C2U	2	NA	0.1333	+	0	10	0.1333	15	C2U	112758_1	12	OLG
chr1	85836243	85836244	Itm2c	3UTR	C2U	14	NA	0.3111	+	0	10	0.3111	45	C2U	577881_1	13	OLG
chr1	85836251	85836252	Itm2c	3UTR	C2U	2	NA	0.2	+	0	10	0.2	10	C2U	291415_1	2	OLG
chr1	86278269	86278270	Ncl	3UTR	C2U	8	NA	0.4444	-	0	10	0.4444	18	C2U	544874_1	7	OLG
chr1	86278320	86278321	Ncl	3UTR	C2U	9	NA	0.45	-	0	10	0.45	20	C2U	246664_1	2	OLG
chr1	86278367	86278368	Ncl	CDS	C2U	7	NA	0.4667	-	0	10	0.4667	15	C2U	134116_1	6	OLG
chr1	86278367	86278368	Ncl	CDS	C2U	10	NA	0.8333	-	0	10	0.8333	12	C2U	429916_1	6	OLG
chr1	86454620	86454621	Ptma	5UTR	C2U	5	NA	0.5	+	0	10	0.5	10	C2U	418892_1	2	OLG
chr1	86454625	86454626	Ptma	5UTR	C2U	5	NA	0.5	+	0	10	0.5	10	C2U	524226_1	5	OLG
chr1	86454625	86454626	Ptma	5UTR	C2U	8	NA	0.5714	+	0	10	0.5714	14	C2U	167009_1	7	OLG
chr1	86454626	86454627	Ptma	CDS	C2U	9	NA	0.75	+	0	10	0.75	12	C2U	227082_1	12	OLG
chr1	86454626	86454627	Ptma	CDS	C2U	8	NA	0.8	+	0	10	0.8	10	C2U	334153_1	5	OLG
chr1	86454649	86454650	Ptma	CDS	C2U	7	NA	0.7	+	0	10	0.7	10	C2U	465964_1	5	OLG
chr1	86454649	86454650	Ptma	CDS	C2U	10	NA	0.7692	+	0	10	0.7692	13	C2U	720337_1	5	OLG
chr1	86454650	86454651	Ptma	CDS	C2U	4	NA	0.4	+	0	10	0.4	10	C2U	650441_1	6	OLG
chr1	86454653	86454654	Ptma	CDS	C2U	13	NA	0.7222	+	0	10	0.7222	18	C2U	140937_1	5	OLG
chr1	86454662	86454663	Ptma	CDS	C2U	7	NA	0.35	+	0	10	0.35	20	C2U	876955_1	7	OLG
chr1	86454662	86454663	Ptma	CDS	C2U	8	NA	0.4706	+	0	10	0.4706	17	C2U	559650_1	7	OLG
chr1	86454662	86454663	Ptma	CDS	C2U	7	NA	0.7	+	0	10	0.7	10	C2U	543503_1	7	OLG
chr1	86454662	86454663	Ptma	CDS	C2U	13	NA	0.9286	+	0	10	0.9286	14	C2U	563388_1	2	OLG
chr1	86454662	86454663	Ptma	CDS	C2U	15	NA	1	+	0	10	1	15	C2U	781620_1	7	OLG
chr1	86454664	86454665	Ptma	CDS	C2U	7	NA	0.3043	+	0	10	0.3043	23	C2U	482428_1	7	OLG
chr1	86454664	86454665	Ptma	CDS	C2U	4	NA	0.3077	+	0	10	0.3077	13	C2U	118968_1	7	OLG
chr1	86454664	86454665	Ptma	CDS	C2U	4	NA	0.3636	+	0	10	0.3636	11	C2U	315708_1	7	OLG
chr1	86454664	86454665	Ptma	CDS	C2U	9	NA	0.375	+	0	10	0.375	24	C2U	115955_1	7	OLG
chr1	86454664	86454665	Ptma	CDS	C2U	11	NA	0.3929	+	0	10	0.3929	28	C2U	163082_1	2	OLG
chr1	86454664	86454665	Ptma	CDS	C2U	8	NA	0.4	+	0	10	0.4	20	C2U	263524_1	2	OLG
chr1	86454664	86454665	Ptma	CDS	C2U	12	NA	0.4444	+	0	10	0.4444	27	C2U	519300_1	3	OLG
chr1	86454664	86454665	Ptma	CDS	C2U	12	NA	0.48	+	0	10	0.48	25	C2U	667881_1	2	OLG
chr1	86454664	86454665	Ptma	CDS	C2U	6	NA	0.5	+	0	10	0.5	12	C2U	488449_1	2	OLG
chr1	86454664	86454665	Ptma	CDS	C2U	11	NA	0.5	+	0	10	0.5	22	C2U	547226_1	6	OLG
chr1	86454664	86454665	Ptma	CDS	C2U	9	NA	0.5	+	0	10	0.5	18	C2U	628061_1	7	OLG
chr1	86454664	86454665	Ptma	CDS	C2U	11	NA	0.5238	+	0	10	0.5238	21	C2U	587671_1	3	OLG
chr1	86454664	86454665	Ptma	CDS	C2U	8	NA	0.6667	+	0	10	0.6667	12	C2U	12078_1	3	OLG
chr1	86454664	86454665	Ptma	CDS	C2U	10	NA	0.6667	+	0	10	0.6667	15	C2U	345163_1	5	OLG
chr1	86454664	86454665	Ptma	CDS	C2U	10	NA	0.6667	+	0	10	0.6667	15	C2U	394061_1	6	OLG
chr1	86454664	86454665	Ptma	CDS	C2U	7	NA	0.7	+	0	10	0.7	10	C2U	458364_1	6	OLG
chr1	86454664	86454665	Ptma	CDS	C2U	9	NA	0.75	+	0	10	0.75	12	C2U	680258_1	3	OLG
chr1	86454664	86454665	Ptma	CDS	C2U	8	NA	0.8	+	0	10	0.8	10	C2U	384832_1	7	OLG
chr1	86454664	86454665	Ptma	CDS	C2U	12	NA	0.8	+	0	10	0.8	15	C2U	788990_1	2	OLG
chr1	86454664	86454665	Ptma	CDS	C2U	9	NA	0.8182	+	0	10	0.8182	11	C2U	684555_1	6	OLG
chr1	86454664	86454665	Ptma	CDS	C2U	10	NA	0.9091	+	0	10	0.9091	11	C2U	276663_1	5	OLG
chr1	86454665	86454666	Ptma	CDS	C2U	5	NA	0.3125	+	0	10	0.3125	16	C2U	833973_1	6	OLG
chr1	86454665	86454666	Ptma	CDS	C2U	4	NA	0.3636	+	0	10	0.3636	11	C2U	689452_1	6	OLG
chr1	86454665	86454666	Ptma	CDS	C2U	10	NA	0.3846	+	0	10	0.3846	26	C2U	132364_1	2	OLG
chr1	86454665	86454666	Ptma	CDS	C2U	5	NA	0.4167	+	0	10	0.4167	12	C2U	687805_1	2	OLG
chr1	86454665	86454666	Ptma	CDS	C2U	8	NA	0.4706	+	0	10	0.4706	17	C2U	582990_1	5	OLG
chr1	86454665	86454666	Ptma	CDS	C2U	7	NA	0.5	+	0	10	0.5	14	C2U	33824_1	5	OLG
chr1	86454665	86454666	Ptma	CDS	C2U	7	NA	0.5	+	0	10	0.5	14	C2U	36857_1	2	OLG
chr1	86454665	86454666	Ptma	CDS	C2U	7	NA	0.5	+	0	10	0.5	14	C2U	438441_1	7	OLG
chr1	86454665	86454666	Ptma	CDS	C2U	8	NA	0.5714	+	0	10	0.5714	14	C2U	154202_1	6	OLG
chr1	86454665	86454666	Ptma	CDS	C2U	11	NA	0.9167	+	0	10	0.9167	12	C2U	206228_1	6	OLG
chr1	86454667	86454668	Ptma	CDS	C2U	8	NA	0.32	+	0	10	0.32	25	C2U	267461_1	7	OLG
chr1	86454667	86454668	Ptma	CDS	C2U	5	NA	0.3571	+	0	10	0.3571	14	C2U	88915_1	7	OLG
chr1	86454667	86454668	Ptma	CDS	C2U	9	NA	0.36	+	0	10	0.36	25	C2U	220944_1	5	OLG
chr1	86454667	86454668	Ptma	CDS	C2U	8	NA	0.3636	+	0	10	0.3636	22	C2U	585636_1	7	OLG
chr1	86454667	86454668	Ptma	CDS	C2U	4	NA	0.4	+	0	10	0.4	10	C2U	524827_1	3	OLG
chr1	86454667	86454668	Ptma	CDS	C2U	9	NA	0.4091	+	0	10	0.4091	22	C2U	240144_1	7	OLG
chr1	86454667	86454668	Ptma	CDS	C2U	6	NA	0.4286	+	0	10	0.4286	14	C2U	566626_1	5	OLG
chr1	86454667	86454668	Ptma	CDS	C2U	10	NA	0.4545	+	0	10	0.4545	22	C2U	45884_1	12	OLG
chr1	86454667	86454668	Ptma	CDS	C2U	10	NA	0.5	+	0	10	0.5	20	C2U	221036_1	7	OLG
chr1	86454667	86454668	Ptma	CDS	C2U	7	NA	0.5	+	0	10	0.5	14	C2U	347554_1	3	OLG
chr1	86454667	86454668	Ptma	CDS	C2U	5	NA	0.5	+	0	10	0.5	10	C2U	533716_1	3	OLG
chr1	86454667	86454668	Ptma	CDS	C2U	5	NA	0.5	+	0	10	0.5	10	C2U	86492_1	2	OLG
chr1	86454667	86454668	Ptma	CDS	C2U	8	NA	0.5333	+	0	10	0.5333	15	C2U	847040_1	7	OLG
chr1	86454667	86454668	Ptma	CDS	C2U	22	NA	0.5366	+	0	10	0.5366	41	C2U	150773_1	6	OLG
chr1	86454667	86454668	Ptma	CDS	C2U	6	NA	0.5455	+	0	10	0.5455	11	C2U	767597_1	2	OLG
chr1	86454667	86454668	Ptma	CDS	C2U	6	NA	0.5455	+	0	10	0.5455	11	C2U	852132_1	6	OLG
chr1	86454667	86454668	Ptma	CDS	C2U	10	NA	0.5556	+	0	10	0.5556	18	C2U	835000_1	7	OLG
chr1	86454667	86454668	Ptma	CDS	C2U	8	NA	0.5714	+	0	10	0.5714	14	C2U	267222_1	2	OLG
chr1	86454667	86454668	Ptma	CDS	C2U	8	NA	0.5714	+	0	10	0.5714	14	C2U	654640_1	6	OLG
chr1	86454667	86454668	Ptma	CDS	C2U	7	NA	0.5833	+	0	10	0.5833	12	C2U	181708_1	2	OLG
chr1	86454667	86454668	Ptma	CDS	C2U	9	NA	0.6429	+	0	10	0.6429	14	C2U	315044_1	6	OLG
chr1	86454667	86454668	Ptma	CDS	C2U	10	NA	0.6667	+	0	10	0.6667	15	C2U	267390_1	3	OLG
chr1	86454667	86454668	Ptma	CDS	C2U	8	NA	0.6667	+	0	10	0.6667	12	C2U	98113_1	3	OLG
chr1	86454667	86454668	Ptma	CDS	C2U	8	NA	0.7273	+	0	10	0.7273	11	C2U	249657_1	5	OLG
chr1	86454667	86454668	Ptma	CDS	C2U	12	NA	0.75	+	0	10	0.75	16	C2U	236932_1	5	OLG
chr1	86454667	86454668	Ptma	CDS	C2U	9	NA	0.75	+	0	10	0.75	12	C2U	491134_1	7	OLG
chr1	86454667	86454668	Ptma	CDS	C2U	11	NA	0.7857	+	0	10	0.7857	14	C2U	61375_1	5	OLG
chr1	86454667	86454668	Ptma	CDS	C2U	17	NA	1	+	0	10	1	17	C2U	366_1	2	OLG
chr1	86454667	86454668	Ptma	CDS	C2U	10	NA	1	+	0	10	1	10	C2U	743376_1	6	OLG
chr1	86454667	86454668	Ptma	CDS	C2U	11	NA	1	+	0	10	1	11	C2U	763489_1	5	OLG
chr1	86454667	86454668	Ptma	CDS	C2U	10	NA	1	+	0	10	1	10	C2U	827226_1	7	OLG
chr1	86454668	86454669	Ptma	CDS	C2U	10	NA	0.4	+	0	10	0.4	25	C2U	334549_1	5	OLG
chr1	86454668	86454669	Ptma	CDS	C2U	6	NA	0.4286	+	0	10	0.4286	14	C2U	534546_1	5	OLG
chr1	86454668	86454669	Ptma	CDS	C2U	9	NA	0.5	+	0	10	0.5	18	C2U	628061_1	7	OLG
chr1	86454668	86454669	Ptma	CDS	C2U	7	NA	0.5833	+	0	10	0.5833	12	C2U	332613_1	5	OLG
chr1	86454668	86454669	Ptma	CDS	C2U	6	NA	0.6	+	0	10	0.6	10	C2U	15510_1	5	OLG
chr1	86454668	86454669	Ptma	CDS	C2U	9	NA	0.6429	+	0	10	0.6429	14	C2U	331253_1	3	OLG
chr1	86454668	86454669	Ptma	CDS	C2U	11	NA	0.6875	+	0	10	0.6875	16	C2U	62776_1	3	OLG
chr1	86454668	86454669	Ptma	CDS	C2U	15	NA	0.7143	+	0	10	0.7143	21	C2U	564760_1	5	OLG
chr1	86454668	86454669	Ptma	CDS	C2U	8	NA	0.7273	+	0	10	0.7273	11	C2U	790085_1	6	OLG
chr1	86454668	86454669	Ptma	CDS	C2U	11	NA	0.7333	+	0	10	0.7333	15	C2U	78082_1	3	OLG
chr1	86454668	86454669	Ptma	CDS	C2U	9	NA	0.75	+	0	10	0.75	12	C2U	312908_1	6	OLG
chr1	86454668	86454669	Ptma	CDS	C2U	9	NA	0.75	+	0	10	0.75	12	C2U	680258_1	3	OLG
chr1	86454668	86454669	Ptma	CDS	C2U	10	NA	0.7692	+	0	10	0.7692	13	C2U	137667_1	13	OLG
chr1	86454668	86454669	Ptma	CDS	C2U	12	NA	0.9231	+	0	10	0.9231	13	C2U	682112_1	2	OLG
chr1	86454668	86454669	Ptma	CDS	C2U	12	NA	1	+	0	10	1	12	C2U	47012_1	7	OLG
chr1	86454668	86454669	Ptma	CDS	C2U	10	NA	1	+	0	10	1	10	C2U	708012_1	5	OLG
chr1	86454668	86454669	Ptma	CDS	C2U	11	NA	1	+	0	10	1	11	C2U	795053_1	3	OLG
chr1	86454668	86454669	Ptma	CDS	C2U	12	NA	1	+	0	10	1	12	C2U	807900_1	7	OLG
chr1	86456928	86456929	Ptma	CDS	C2U	3	NA	0.1667	+	0	10	0.1667	18	C2U	279568_1	3	OLG
chr1	86456948	86456949	Ptma	CDS	C2U	5	NA	0.3846	+	0	10	0.3846	13	C2U	601998_1	6	OLG
chr1	86456952	86456953	Ptma	CDS	C2U	5	NA	0.3846	+	0	10	0.3846	13	C2U	629297_1	2	OLG
chr1	86456952	86456953	Ptma	CDS	C2U	9	NA	0.3913	+	0	10	0.3913	23	C2U	644340_1	2	OLG
chr1	86458086	86458087	Ptma	3UTR	C2U	12	NA	1	+	0	10	1	12	C2U	618923_1	2	OLG
chr1	86458096	86458097	Ptma	3UTR	C2U	6	NA	0.5	+	0	10	0.5	12	C2U	816333_1	13	OLG
chr1	86458096	86458097	Ptma	3UTR	C2U	10	NA	1	+	0	10	1	10	C2U	629254_1	6	OLG
chr1	86458103	86458104	Ptma	3UTR	C2U	11	NA	0.3143	+	0	10	0.3143	35	C2U	88218_1	2	OLG
chr1	86458103	86458104	Ptma	3UTR	C2U	5	NA	0.3571	+	0	10	0.3571	14	C2U	27069_1	2	OLG
chr1	86458103	86458104	Ptma	3UTR	C2U	6	NA	0.5	+	0	10	0.5	12	C2U	540148_1	2	OLG
chr1	86458103	86458104	Ptma	3UTR	C2U	9	NA	0.5625	+	0	10	0.5625	16	C2U	371626_1	2	OLG
chr1	86458103	86458104	Ptma	3UTR	C2U	7	NA	0.7	+	0	10	0.7	10	C2U	184193_1	2	OLG
chr1	86458103	86458104	Ptma	3UTR	C2U	14	NA	1	+	0	10	1	14	C2U	379399_1	5	OLG
chr1	86458103	86458104	Ptma	3UTR	C2U	10	NA	1	+	0	10	1	10	C2U	703351_1	5	OLG
chr1	86458107	86458108	Ptma	3UTR	C2U	6	NA	0.3	+	0	10	0.3	20	C2U	721651_1	12	OLG
chr1	86458107	86458108	Ptma	3UTR	C2U	5	NA	0.3571	+	0	10	0.3571	14	C2U	585038_1	12	OLG
chr1	86458107	86458108	Ptma	3UTR	C2U	12	NA	0.375	+	0	10	0.375	32	C2U	759184_1	3	OLG
chr1	86458107	86458108	Ptma	3UTR	C2U	10	NA	0.3846	+	0	10	0.3846	26	C2U	810520_1	2	OLG
chr1	86458107	86458108	Ptma	3UTR	C2U	5	NA	0.3846	+	0	10	0.3846	13	C2U	882820_1	3	OLG
chr1	86458107	86458108	Ptma	3UTR	C2U	7	NA	0.3889	+	0	10	0.3889	18	C2U	604012_1	2	OLG
chr1	86458107	86458108	Ptma	3UTR	C2U	4	NA	0.4	+	0	10	0.4	10	C2U	708815_1	2	OLG
chr1	86458107	86458108	Ptma	3UTR	C2U	7	NA	0.4118	+	0	10	0.4118	17	C2U	332224_1	3	OLG
chr1	86458107	86458108	Ptma	3UTR	C2U	7	NA	0.4118	+	0	10	0.4118	17	C2U	858699_1	2	OLG
chr1	86458107	86458108	Ptma	3UTR	C2U	5	NA	0.4167	+	0	10	0.4167	12	C2U	470638_1	3	OLG
chr1	86458107	86458108	Ptma	3UTR	C2U	11	NA	0.4231	+	0	10	0.4231	26	C2U	857452_1	3	OLG
chr1	86458107	86458108	Ptma	3UTR	C2U	7	NA	0.4375	+	0	10	0.4375	16	C2U	558106_1	2	OLG
chr1	86458107	86458108	Ptma	3UTR	C2U	8	NA	0.4444	+	0	10	0.4444	18	C2U	489169_1	2	OLG
chr1	86458107	86458108	Ptma	3UTR	C2U	10	NA	0.4545	+	0	10	0.4545	22	C2U	281659_1	3	OLG
chr1	86458107	86458108	Ptma	3UTR	C2U	6	NA	0.4615	+	0	10	0.4615	13	C2U	34522_1	2	OLG
chr1	86458107	86458108	Ptma	3UTR	C2U	12	NA	0.48	+	0	10	0.48	25	C2U	630059_1	3	OLG
chr1	86458107	86458108	Ptma	3UTR	C2U	5	NA	0.5	+	0	10	0.5	10	C2U	228996_1	2	OLG
chr1	86458107	86458108	Ptma	3UTR	C2U	9	NA	0.5	+	0	10	0.5	18	C2U	272394_1	13	OLG
chr1	86458107	86458108	Ptma	3UTR	C2U	6	NA	0.5	+	0	10	0.5	12	C2U	497572_1	3	OLG
chr1	86458107	86458108	Ptma	3UTR	C2U	5	NA	0.5	+	0	10	0.5	10	C2U	588878_1	13	OLG
chr1	86458107	86458108	Ptma	3UTR	C2U	5	NA	0.5	+	0	10	0.5	10	C2U	844668_1	2	OLG
chr1	86458107	86458108	Ptma	3UTR	C2U	10	NA	0.5263	+	0	10	0.5263	19	C2U	176260_1	3	OLG
chr1	86458107	86458108	Ptma	3UTR	C2U	9	NA	0.5294	+	0	10	0.5294	17	C2U	598753_1	2	OLG
chr1	86458107	86458108	Ptma	3UTR	C2U	17	NA	0.5312	+	0	10	0.5312	32	C2U	456667_1	2	OLG
chr1	86458107	86458108	Ptma	3UTR	C2U	7	NA	0.5385	+	0	10	0.5385	13	C2U	439773_1	3	OLG
chr1	86458107	86458108	Ptma	3UTR	C2U	7	NA	0.5385	+	0	10	0.5385	13	C2U	488987_1	3	OLG
chr1	86458107	86458108	Ptma	3UTR	C2U	7	NA	0.5833	+	0	10	0.5833	12	C2U	655555_1	2	OLG
chr1	86458107	86458108	Ptma	3UTR	C2U	10	NA	0.5882	+	0	10	0.5882	17	C2U	527083_1	7	OLG
chr1	86458107	86458108	Ptma	3UTR	C2U	10	NA	0.625	+	0	10	0.625	16	C2U	580651_1	7	OLG
chr1	86458107	86458108	Ptma	3UTR	C2U	7	NA	0.6364	+	0	10	0.6364	11	C2U	448648_1	3	OLG
chr1	86458107	86458108	Ptma	3UTR	C2U	13	NA	0.65	+	0	10	0.65	20	C2U	570555_1	3	OLG
chr1	86458107	86458108	Ptma	3UTR	C2U	10	NA	0.6667	+	0	10	0.6667	15	C2U	817736_1	7	OLG
chr1	86458107	86458108	Ptma	3UTR	C2U	9	NA	0.9	+	0	10	0.9	10	C2U	750194_1	2	OLG
chr1	86458107	86458108	Ptma	3UTR	C2U	12	NA	1	+	0	10	1	12	C2U	120404_1	5	OLG
chr1	86458107	86458108	Ptma	3UTR	C2U	12	NA	1	+	0	10	1	12	C2U	684370_1	3	OLG
chr1	86458107	86458108	Ptma	3UTR	C2U	10	NA	1	+	0	10	1	10	C2U	83071_1	6	OLG
chr1	86458107	86458108	Ptma	3UTR	C2U	10	NA	1	+	0	10	1	10	C2U	856848_1	5	OLG
chr1	86458112	86458113	Ptma	3UTR	C2U	7	NA	0.25	+	0	10	0.25	28	C2U	113324_1	12	OLG
chr1	86458112	86458113	Ptma	3UTR	C2U	7	NA	0.2692	+	0	10	0.2692	26	C2U	232000_1	12	OLG
chr1	86458112	86458113	Ptma	3UTR	C2U	21	NA	0.3043	+	0	10	0.3043	69	C2U	681319_1	12	OLG
chr1	86458112	86458113	Ptma	3UTR	C2U	11	NA	0.3143	+	0	10	0.3143	35	C2U	268251_1	13	OLG
chr1	86458112	86458113	Ptma	3UTR	C2U	7	NA	0.3333	+	0	10	0.3333	21	C2U	742144_1	7	OLG
chr1	86458112	86458113	Ptma	3UTR	C2U	9	NA	0.3462	+	0	10	0.3462	26	C2U	655425_1	7	OLG
chr1	86458112	86458113	Ptma	3UTR	C2U	7	NA	0.35	+	0	10	0.35	20	C2U	702978_1	7	OLG
chr1	86458112	86458113	Ptma	3UTR	C2U	5	NA	0.3571	+	0	10	0.3571	14	C2U	732635_1	7	OLG
chr1	86458112	86458113	Ptma	3UTR	C2U	5	NA	0.3571	+	0	10	0.3571	14	C2U	863074_1	7	OLG
chr1	86458112	86458113	Ptma	3UTR	C2U	14	NA	0.359	+	0	10	0.359	39	C2U	737761_1	7	OLG
chr1	86458112	86458113	Ptma	3UTR	C2U	9	NA	0.36	+	0	10	0.36	25	C2U	231547_1	7	OLG
chr1	86458112	86458113	Ptma	3UTR	C2U	7	NA	0.3684	+	0	10	0.3684	19	C2U	175724_1	7	OLG
chr1	86458112	86458113	Ptma	3UTR	C2U	7	NA	0.3684	+	0	10	0.3684	19	C2U	583097_1	2	OLG
chr1	86458112	86458113	Ptma	3UTR	C2U	10	NA	0.3704	+	0	10	0.3704	27	C2U	147726_1	2	OLG
chr1	86458112	86458113	Ptma	3UTR	C2U	13	NA	0.3714	+	0	10	0.3714	35	C2U	95840_1	13	OLG
chr1	86458112	86458113	Ptma	3UTR	C2U	16	NA	0.3721	+	0	10	0.3721	43	C2U	774049_1	7	OLG
chr1	86458112	86458113	Ptma	3UTR	C2U	6	NA	0.375	+	0	10	0.375	16	C2U	701863_1	6	OLG
chr1	86458112	86458113	Ptma	3UTR	C2U	8	NA	0.381	+	0	10	0.381	21	C2U	119651_1	2	OLG
chr1	86458112	86458113	Ptma	3UTR	C2U	8	NA	0.381	+	0	10	0.381	21	C2U	839787_1	6	OLG
chr1	86458112	86458113	Ptma	3UTR	C2U	5	NA	0.3846	+	0	10	0.3846	13	C2U	645417_1	2	OLG
chr1	86458112	86458113	Ptma	3UTR	C2U	10	NA	0.3846	+	0	10	0.3846	26	C2U	782434_1	7	OLG
chr1	86458112	86458113	Ptma	3UTR	C2U	10	NA	0.3846	+	0	10	0.3846	26	C2U	82891_1	13	OLG
chr1	86458112	86458113	Ptma	3UTR	C2U	14	NA	0.3889	+	0	10	0.3889	36	C2U	22830_1	12	OLG
chr1	86458112	86458113	Ptma	3UTR	C2U	7	NA	0.3889	+	0	10	0.3889	18	C2U	293231_1	2	OLG
chr1	86458112	86458113	Ptma	3UTR	C2U	8	NA	0.4	+	0	10	0.4	20	C2U	297862_1	6	OLG
chr1	86458112	86458113	Ptma	3UTR	C2U	11	NA	0.4074	+	0	10	0.4074	27	C2U	156192_1	5	OLG
chr1	86458112	86458113	Ptma	3UTR	C2U	7	NA	0.4118	+	0	10	0.4118	17	C2U	509773_1	5	OLG
chr1	86458112	86458113	Ptma	3UTR	C2U	10	NA	0.4167	+	0	10	0.4167	24	C2U	614803_1	6	OLG
chr1	86458112	86458113	Ptma	3UTR	C2U	16	NA	0.4211	+	0	10	0.4211	38	C2U	833773_1	3	OLG
chr1	86458112	86458113	Ptma	3UTR	C2U	11	NA	0.4231	+	0	10	0.4231	26	C2U	239328_1	2	OLG
chr1	86458112	86458113	Ptma	3UTR	C2U	9	NA	0.4286	+	0	10	0.4286	21	C2U	366941_1	7	OLG
chr1	86458112	86458113	Ptma	3UTR	C2U	9	NA	0.4286	+	0	10	0.4286	21	C2U	408477_1	6	OLG
chr1	86458112	86458113	Ptma	3UTR	C2U	6	NA	0.4286	+	0	10	0.4286	14	C2U	563630_1	3	OLG
chr1	86458112	86458113	Ptma	3UTR	C2U	13	NA	0.4333	+	0	10	0.4333	30	C2U	32387_1	6	OLG
chr1	86458112	86458113	Ptma	3UTR	C2U	10	NA	0.4348	+	0	10	0.4348	23	C2U	454333_1	7	OLG
chr1	86458112	86458113	Ptma	3UTR	C2U	10	NA	0.4348	+	0	10	0.4348	23	C2U	496747_1	5	OLG
chr1	86458112	86458113	Ptma	3UTR	C2U	7	NA	0.4375	+	0	10	0.4375	16	C2U	15524_1	6	OLG
chr1	86458112	86458113	Ptma	3UTR	C2U	8	NA	0.4444	+	0	10	0.4444	18	C2U	115066_1	12	OLG
chr1	86458112	86458113	Ptma	3UTR	C2U	8	NA	0.4444	+	0	10	0.4444	18	C2U	593128_1	6	OLG
chr1	86458112	86458113	Ptma	3UTR	C2U	8	NA	0.4444	+	0	10	0.4444	18	C2U	798582_1	5	OLG
chr1	86458112	86458113	Ptma	3UTR	C2U	9	NA	0.45	+	0	10	0.45	20	C2U	650391_1	7	OLG
chr1	86458112	86458113	Ptma	3UTR	C2U	5	NA	0.4545	+	0	10	0.4545	11	C2U	250936_1	3	OLG
chr1	86458112	86458113	Ptma	3UTR	C2U	5	NA	0.4545	+	0	10	0.4545	11	C2U	882863_1	6	OLG
chr1	86458112	86458113	Ptma	3UTR	C2U	14	NA	0.4667	+	0	10	0.4667	30	C2U	114007_1	7	OLG
chr1	86458112	86458113	Ptma	3UTR	C2U	8	NA	0.4706	+	0	10	0.4706	17	C2U	107868_1	2	OLG
chr1	86458112	86458113	Ptma	3UTR	C2U	10	NA	0.4762	+	0	10	0.4762	21	C2U	522844_1	3	OLG
chr1	86458112	86458113	Ptma	3UTR	C2U	11	NA	0.4783	+	0	10	0.4783	23	C2U	198956_1	3	OLG
chr1	86458112	86458113	Ptma	3UTR	C2U	5	NA	0.5	+	0	10	0.5	10	C2U	282460_1	7	OLG
chr1	86458112	86458113	Ptma	3UTR	C2U	5	NA	0.5	+	0	10	0.5	10	C2U	35214_1	6	OLG
chr1	86458112	86458113	Ptma	3UTR	C2U	5	NA	0.5	+	0	10	0.5	10	C2U	563590_1	6	OLG
chr1	86458112	86458113	Ptma	3UTR	C2U	9	NA	0.5	+	0	10	0.5	18	C2U	80019_1	3	OLG
chr1	86458112	86458113	Ptma	3UTR	C2U	25	NA	0.5208	+	0	10	0.5208	48	C2U	343473_1	2	OLG
chr1	86458112	86458113	Ptma	3UTR	C2U	11	NA	0.5238	+	0	10	0.5238	21	C2U	421690_1	3	OLG
chr1	86458112	86458113	Ptma	3UTR	C2U	9	NA	0.5294	+	0	10	0.5294	17	C2U	401883_1	5	OLG
chr1	86458112	86458113	Ptma	3UTR	C2U	9	NA	0.5294	+	0	10	0.5294	17	C2U	680355_1	2	OLG
chr1	86458112	86458113	Ptma	3UTR	C2U	9	NA	0.5294	+	0	10	0.5294	17	C2U	802424_1	2	OLG
chr1	86458112	86458113	Ptma	3UTR	C2U	17	NA	0.5312	+	0	10	0.5312	32	C2U	456667_1	2	OLG
chr1	86458112	86458113	Ptma	3UTR	C2U	8	NA	0.5333	+	0	10	0.5333	15	C2U	217465_1	3	OLG
chr1	86458112	86458113	Ptma	3UTR	C2U	13	NA	0.5417	+	0	10	0.5417	24	C2U	204922_1	3	OLG
chr1	86458112	86458113	Ptma	3UTR	C2U	13	NA	0.5417	+	0	10	0.5417	24	C2U	330363_1	2	OLG
chr1	86458112	86458113	Ptma	3UTR	C2U	6	NA	0.5455	+	0	10	0.5455	11	C2U	54605_1	13	OLG
chr1	86458112	86458113	Ptma	3UTR	C2U	11	NA	0.55	+	0	10	0.55	20	C2U	470259_1	2	OLG
chr1	86458112	86458113	Ptma	3UTR	C2U	10	NA	0.5556	+	0	10	0.5556	18	C2U	594640_1	7	OLG
chr1	86458112	86458113	Ptma	3UTR	C2U	10	NA	0.5556	+	0	10	0.5556	18	C2U	614496_1	6	OLG
chr1	86458112	86458113	Ptma	3UTR	C2U	13	NA	0.5652	+	0	10	0.5652	23	C2U	112443_1	6	OLG
chr1	86458112	86458113	Ptma	3UTR	C2U	26	NA	0.5652	+	0	10	0.5652	46	C2U	78486_1	6	OLG
chr1	86458112	86458113	Ptma	3UTR	C2U	8	NA	0.5714	+	0	10	0.5714	14	C2U	485532_1	2	OLG
chr1	86458112	86458113	Ptma	3UTR	C2U	15	NA	0.5769	+	0	10	0.5769	26	C2U	765527_1	2	OLG
chr1	86458112	86458113	Ptma	3UTR	C2U	15	NA	0.6	+	0	10	0.6	25	C2U	254118_1	2	OLG
chr1	86458112	86458113	Ptma	3UTR	C2U	12	NA	0.6	+	0	10	0.6	20	C2U	296270_1	5	OLG
chr1	86458112	86458113	Ptma	3UTR	C2U	15	NA	0.6	+	0	10	0.6	25	C2U	818846_1	2	OLG
chr1	86458112	86458113	Ptma	3UTR	C2U	14	NA	0.6087	+	0	10	0.6087	23	C2U	269087_1	6	OLG
chr1	86458112	86458113	Ptma	3UTR	C2U	8	NA	0.6154	+	0	10	0.6154	13	C2U	662771_1	6	OLG
chr1	86458112	86458113	Ptma	3UTR	C2U	10	NA	0.625	+	0	10	0.625	16	C2U	615298_1	3	OLG
chr1	86458112	86458113	Ptma	3UTR	C2U	12	NA	0.6316	+	0	10	0.6316	19	C2U	819435_1	2	OLG
chr1	86458112	86458113	Ptma	3UTR	C2U	10	NA	0.6667	+	0	10	0.6667	15	C2U	477416_1	2	OLG
chr1	86458112	86458113	Ptma	3UTR	C2U	13	NA	0.6842	+	0	10	0.6842	19	C2U	809644_1	6	OLG
chr1	86458112	86458113	Ptma	3UTR	C2U	11	NA	0.6875	+	0	10	0.6875	16	C2U	155877_1	6	OLG
chr1	86458112	86458113	Ptma	3UTR	C2U	9	NA	0.6923	+	0	10	0.6923	13	C2U	159446_1	2	OLG
chr1	86458112	86458113	Ptma	3UTR	C2U	7	NA	0.7	+	0	10	0.7	10	C2U	403533_1	2	OLG
chr1	86458112	86458113	Ptma	3UTR	C2U	10	NA	0.7143	+	0	10	0.7143	14	C2U	509218_1	2	OLG
chr1	86458112	86458113	Ptma	3UTR	C2U	10	NA	0.7143	+	0	10	0.7143	14	C2U	752119_1	6	OLG
chr1	86458112	86458113	Ptma	3UTR	C2U	17	NA	0.7391	+	0	10	0.7391	23	C2U	538499_1	3	OLG
chr1	86458112	86458113	Ptma	3UTR	C2U	9	NA	0.75	+	0	10	0.75	12	C2U	219329_1	6	OLG
chr1	86458112	86458113	Ptma	3UTR	C2U	15	NA	0.75	+	0	10	0.75	20	C2U	357176_1	6	OLG
chr1	86458112	86458113	Ptma	3UTR	C2U	15	NA	0.7895	+	0	10	0.7895	19	C2U	481078_1	2	OLG
chr1	86458112	86458113	Ptma	3UTR	C2U	13	NA	0.9286	+	0	10	0.9286	14	C2U	272339_1	5	OLG
chr1	86458112	86458113	Ptma	3UTR	C2U	18	NA	0.9474	+	0	10	0.9474	19	C2U	584163_1	6	OLG
chr1	86458124	86458125	Ptma	3UTR	C2U	2	NA	0.1333	+	0	10	0.1333	15	C2U	755767_1	3	OLG
chr1	86458124	86458125	Ptma	3UTR	C2U	5	NA	0.1852	+	0	10	0.1852	27	C2U	477286_1	3	OLG
chr1	86458124	86458125	Ptma	3UTR	C2U	3	NA	0.2	+	0	10	0.2	15	C2U	102226_1	3	OLG
chr1	86458124	86458125	Ptma	3UTR	C2U	8	NA	0.2051	+	0	10	0.2051	39	C2U	256500_1	3	OLG
chr1	86458124	86458125	Ptma	3UTR	C2U	8	NA	0.2222	+	0	10	0.2222	36	C2U	783777_1	3	OLG
chr1	86458124	86458125	Ptma	3UTR	C2U	4	NA	0.2222	+	0	10	0.2222	18	C2U	786015_1	3	OLG
chr1	86458124	86458125	Ptma	3UTR	C2U	6	NA	0.24	+	0	10	0.24	25	C2U	665807_1	2	OLG
chr1	86458124	86458125	Ptma	3UTR	C2U	4	NA	0.25	+	0	10	0.25	16	C2U	241715_1	2	OLG
chr1	86458124	86458125	Ptma	3UTR	C2U	5	NA	0.3571	+	0	10	0.3571	14	C2U	434473_1	3	OLG
chr1	86458124	86458125	Ptma	3UTR	C2U	10	NA	0.5556	+	0	10	0.5556	18	C2U	175596_1	2	OLG
chr1	86458125	86458126	Ptma	3UTR	C2U	10	NA	0.3846	+	0	10	0.3846	26	C2U	620659_1	3	OLG
chr1	86458125	86458126	Ptma	3UTR	C2U	12	NA	0.4286	+	0	10	0.4286	28	C2U	581803_1	5	OLG
chr1	86458125	86458126	Ptma	3UTR	C2U	8	NA	0.6667	+	0	10	0.6667	12	C2U	656240_1	3	OLG
chr1	86458131	86458132	Ptma	3UTR	C2U	3	NA	0.1765	+	0	10	0.1765	17	C2U	876439_1	3	OLG
chr1	86458131	86458132	Ptma	3UTR	C2U	4	NA	0.1905	+	0	10	0.1905	21	C2U	506540_1	3	OLG
chr1	86458131	86458132	Ptma	3UTR	C2U	12	NA	0.2182	+	0	10	0.2182	55	C2U	491024_1	3	OLG
chr1	86458131	86458132	Ptma	3UTR	C2U	7	NA	0.2258	+	0	10	0.2258	31	C2U	251524_1	3	OLG
chr1	86458131	86458132	Ptma	3UTR	C2U	10	NA	0.2632	+	0	10	0.2632	38	C2U	223027_1	3	OLG
chr1	86458131	86458132	Ptma	3UTR	C2U	4	NA	0.2667	+	0	10	0.2667	15	C2U	90273_1	2	OLG
chr1	86458131	86458132	Ptma	3UTR	C2U	7	NA	0.2692	+	0	10	0.2692	26	C2U	56560_1	2	OLG
chr1	86458131	86458132	Ptma	3UTR	C2U	5	NA	0.2941	+	0	10	0.2941	17	C2U	172617_1	2	OLG
chr1	86458131	86458132	Ptma	3UTR	C2U	4	NA	0.3077	+	0	10	0.3077	13	C2U	534410_1	2	OLG
chr1	86458131	86458132	Ptma	3UTR	C2U	7	NA	0.4118	+	0	10	0.4118	17	C2U	136659_1	2	OLG
chr1	86458131	86458132	Ptma	3UTR	C2U	10	NA	0.4167	+	0	10	0.4167	24	C2U	472636_1	3	OLG
chr1	86458131	86458132	Ptma	3UTR	C2U	11	NA	0.44	+	0	10	0.44	25	C2U	396446_1	6	OLG
chr1	86458131	86458132	Ptma	3UTR	C2U	9	NA	0.5625	+	0	10	0.5625	16	C2U	232559_1	6	OLG
chr1	86458131	86458132	Ptma	3UTR	C2U	13	NA	1	+	0	10	1	13	C2U	523139_1	5	OLG
chr1	86458140	86458141	Ptma	3UTR	C2U	10	NA	0.1923	+	0	10	0.1923	52	C2U	505595_1	13	OLG
chr1	86458140	86458141	Ptma	3UTR	C2U	3	NA	0.2	+	0	10	0.2	15	C2U	641555_1	13	OLG
chr1	86458140	86458141	Ptma	3UTR	C2U	6	NA	0.2308	+	0	10	0.2308	26	C2U	307954_1	13	OLG
chr1	86458140	86458141	Ptma	3UTR	C2U	14	NA	0.2593	+	0	10	0.2593	54	C2U	277736_1	2	OLG
chr1	86458140	86458141	Ptma	3UTR	C2U	5	NA	0.2632	+	0	10	0.2632	19	C2U	381559_1	6	OLG
chr1	86458140	86458141	Ptma	3UTR	C2U	4	NA	0.2857	+	0	10	0.2857	14	C2U	629297_1	2	OLG
chr1	86458140	86458141	Ptma	3UTR	C2U	5	NA	0.2941	+	0	10	0.2941	17	C2U	750797_1	6	OLG
chr1	86458140	86458141	Ptma	3UTR	C2U	7	NA	0.3182	+	0	10	0.3182	22	C2U	589439_1	6	OLG
chr1	86458140	86458141	Ptma	3UTR	C2U	11	NA	0.3235	+	0	10	0.3235	34	C2U	87150_1	2	OLG
chr1	86458140	86458141	Ptma	3UTR	C2U	7	NA	0.3333	+	0	10	0.3333	21	C2U	90907_1	3	OLG
chr1	86458140	86458141	Ptma	3UTR	C2U	9	NA	0.3462	+	0	10	0.3462	26	C2U	680042_1	3	OLG
chr1	86458140	86458141	Ptma	3UTR	C2U	22	NA	0.3729	+	0	10	0.3729	59	C2U	359649_1	2	OLG
chr1	86458140	86458141	Ptma	3UTR	C2U	15	NA	0.5769	+	0	10	0.5769	26	C2U	797414_1	3	OLG
chr1	86458140	86458141	Ptma	3UTR	C2U	11	NA	0.7333	+	0	10	0.7333	15	C2U	427687_1	3	OLG
chr1	86458142	86458143	Ptma	3UTR	C2U	6	NA	0.25	+	0	10	0.25	24	C2U	487064_1	2	OLG
chr1	86458142	86458143	Ptma	3UTR	C2U	6	NA	0.25	+	0	10	0.25	24	C2U	833446_1	2	OLG
chr1	86458142	86458143	Ptma	3UTR	C2U	10	NA	0.2703	+	0	10	0.2703	37	C2U	597802_1	5	OLG
chr1	86458142	86458143	Ptma	3UTR	C2U	7	NA	0.28	+	0	10	0.28	25	C2U	812303_1	2	OLG
chr1	86458142	86458143	Ptma	3UTR	C2U	8	NA	0.2963	+	0	10	0.2963	27	C2U	259475_1	2	OLG
chr1	86458142	86458143	Ptma	3UTR	C2U	7	NA	0.3182	+	0	10	0.3182	22	C2U	84795_1	3	OLG
chr1	86458142	86458143	Ptma	3UTR	C2U	10	NA	0.3226	+	0	10	0.3226	31	C2U	437916_1	5	OLG
chr1	86458142	86458143	Ptma	3UTR	C2U	8	NA	0.3333	+	0	10	0.3333	24	C2U	300966_1	3	OLG
chr1	86458142	86458143	Ptma	3UTR	C2U	6	NA	0.3333	+	0	10	0.3333	18	C2U	453881_1	5	OLG
chr1	86458142	86458143	Ptma	3UTR	C2U	9	NA	0.3462	+	0	10	0.3462	26	C2U	401883_1	5	OLG
chr1	86458142	86458143	Ptma	3UTR	C2U	9	NA	0.3462	+	0	10	0.3462	26	C2U	680042_1	3	OLG
chr1	86458142	86458143	Ptma	3UTR	C2U	8	NA	0.3478	+	0	10	0.3478	23	C2U	107868_1	2	OLG
chr1	86458142	86458143	Ptma	3UTR	C2U	9	NA	0.3913	+	0	10	0.3913	23	C2U	516062_1	3	OLG
chr1	86458142	86458143	Ptma	3UTR	C2U	9	NA	0.4286	+	0	10	0.4286	21	C2U	439800_1	2	OLG
chr1	86458142	86458143	Ptma	3UTR	C2U	9	NA	0.6	+	0	10	0.6	15	C2U	662157_1	3	OLG
chr1	86458160	86458161	Ptma	3UTR	C2U	6	NA	0.125	+	0	10	0.125	48	C2U	448648_1	3	OLG
chr1	86458160	86458161	Ptma	3UTR	C2U	8	NA	0.1455	+	0	10	0.1455	55	C2U	194286_1	3	OLG
chr1	86458160	86458161	Ptma	3UTR	C2U	12	NA	0.169	+	0	10	0.169	71	C2U	374013_1	3	OLG
chr1	86458160	86458161	Ptma	3UTR	C2U	6	NA	0.2222	+	0	10	0.2222	27	C2U	661839_1	3	OLG
chr1	86458160	86458161	Ptma	3UTR	C2U	7	NA	0.2333	+	0	10	0.2333	30	C2U	764784_1	2	OLG
chr1	86458160	86458161	Ptma	3UTR	C2U	18	NA	0.2368	+	0	10	0.2368	76	C2U	445699_1	2	OLG
chr1	86458160	86458161	Ptma	3UTR	C2U	9	NA	0.2432	+	0	10	0.2432	37	C2U	663013_1	13	OLG
chr1	86458160	86458161	Ptma	3UTR	C2U	11	NA	0.25	+	0	10	0.25	44	C2U	565658_1	2	OLG
chr1	86458160	86458161	Ptma	3UTR	C2U	6	NA	0.2857	+	0	10	0.2857	21	C2U	186857_1	2	OLG
chr1	86458160	86458161	Ptma	3UTR	C2U	10	NA	0.3333	+	0	10	0.3333	30	C2U	300970_1	2	OLG
chr1	86458160	86458161	Ptma	3UTR	C2U	4	NA	0.3333	+	0	10	0.3333	12	C2U	745040_1	2	OLG
chr1	86458161	86458162	Ptma	3UTR	C2U	3	NA	0.15	+	0	10	0.15	20	C2U	771063_1	2	OLG
chr1	86458161	86458162	Ptma	3UTR	C2U	2	NA	0.1667	+	0	10	0.1667	12	C2U	682112_1	2	OLG
chr1	86458161	86458162	Ptma	3UTR	C2U	12	NA	0.1875	+	0	10	0.1875	64	C2U	844937_1	2	OLG
chr1	86458161	86458162	Ptma	3UTR	C2U	9	NA	0.1915	+	0	10	0.1915	47	C2U	283764_1	3	OLG
chr1	86458161	86458162	Ptma	3UTR	C2U	6	NA	0.25	+	0	10	0.25	24	C2U	113094_1	6	OLG
chr1	86458161	86458162	Ptma	3UTR	C2U	4	NA	0.2857	+	0	10	0.2857	14	C2U	345163_1	5	OLG
chr1	86458161	86458162	Ptma	3UTR	C2U	10	NA	0.3333	+	0	10	0.3333	30	C2U	300970_1	2	OLG
chr1	86458161	86458162	Ptma	3UTR	C2U	5	NA	0.3571	+	0	10	0.3571	14	C2U	652053_1	2	OLG
chr1	86458161	86458162	Ptma	3UTR	C2U	15	NA	0.375	+	0	10	0.375	40	C2U	546605_1	3	OLG
chr1	86458161	86458162	Ptma	3UTR	C2U	11	NA	0.3929	+	0	10	0.3929	28	C2U	435262_1	5	OLG
chr1	86458161	86458162	Ptma	3UTR	C2U	4	NA	0.4	+	0	10	0.4	10	C2U	563590_1	6	OLG
chr1	86458175	86458176	Ptma	3UTR	C2U	2	NA	0.1176	+	0	10	0.1176	17	C2U	507081_1	7	OLG
chr1	86458175	86458176	Ptma	3UTR	C2U	7	NA	0.1628	+	0	10	0.1628	43	C2U	489169_1	2	OLG
chr1	86458175	86458176	Ptma	3UTR	C2U	10	NA	0.1724	+	0	10	0.1724	58	C2U	308355_1	2	OLG
chr1	86458175	86458176	Ptma	3UTR	C2U	6	NA	0.1818	+	0	10	0.1818	33	C2U	142484_1	2	OLG
chr1	86458175	86458176	Ptma	3UTR	C2U	4	NA	0.1818	+	0	10	0.1818	22	C2U	566288_1	3	OLG
chr1	86458175	86458176	Ptma	3UTR	C2U	9	NA	0.2432	+	0	10	0.2432	37	C2U	337862_1	7	OLG
chr1	86458175	86458176	Ptma	3UTR	C2U	5	NA	0.25	+	0	10	0.25	20	C2U	481482_1	2	OLG
chr1	86458175	86458176	Ptma	3UTR	C2U	7	NA	0.5	+	0	10	0.5	14	C2U	162638_1	2	OLG
chr1	86458181	86458182	Ptma	3UTR	C2U	5	NA	0.1282	+	0	10	0.1282	39	C2U	854586_1	12	OLG
chr1	86458181	86458182	Ptma	3UTR	C2U	4	NA	0.1739	+	0	10	0.1739	23	C2U	472281_1	13	OLG
chr1	86458181	86458182	Ptma	3UTR	C2U	6	NA	0.1765	+	0	10	0.1765	34	C2U	651847_1	3	OLG
chr1	86458181	86458182	Ptma	3UTR	C2U	16	NA	0.2078	+	0	10	0.2078	77	C2U	699591_1	3	OLG
chr1	86458181	86458182	Ptma	3UTR	C2U	10	NA	0.2128	+	0	10	0.2128	47	C2U	836293_1	13	OLG
chr1	86458181	86458182	Ptma	3UTR	C2U	8	NA	0.2424	+	0	10	0.2424	33	C2U	764784_1	2	OLG
chr1	86458181	86458182	Ptma	3UTR	C2U	7	NA	0.28	+	0	10	0.28	25	C2U	795053_1	3	OLG
chr1	86458181	86458182	Ptma	3UTR	C2U	13	NA	0.2889	+	0	10	0.2889	45	C2U	113759_1	3	OLG
chr1	86458181	86458182	Ptma	3UTR	C2U	8	NA	0.32	+	0	10	0.32	25	C2U	737459_1	3	OLG
chr1	86458181	86458182	Ptma	3UTR	C2U	9	NA	0.36	+	0	10	0.36	25	C2U	59075_1	2	OLG
chr1	86458181	86458182	Ptma	3UTR	C2U	4	NA	0.4	+	0	10	0.4	10	C2U	159315_1	6	OLG
chr1	86458181	86458182	Ptma	3UTR	C2U	13	NA	0.4062	+	0	10	0.4062	32	C2U	191107_1	3	OLG
chr1	86458181	86458182	Ptma	3UTR	C2U	12	NA	0.48	+	0	10	0.48	25	C2U	836074_1	2	OLG
chr1	86458181	86458182	Ptma	3UTR	C2U	8	NA	0.5	+	0	10	0.5	16	C2U	220728_1	6	OLG
chr1	86458181	86458182	Ptma	3UTR	C2U	11	NA	0.5789	+	0	10	0.5789	19	C2U	57433_1	3	OLG
chr1	86458181	86458182	Ptma	3UTR	C2U	13	NA	0.619	+	0	10	0.619	21	C2U	161159_1	6	OLG
chr1	86458181	86458182	Ptma	3UTR	C2U	15	NA	0.6522	+	0	10	0.6522	23	C2U	592935_1	2	OLG
chr1	86458184	86458185	Ptma	3UTR	C2U	3	NA	0.1154	+	0	10	0.1154	26	C2U	579098_1	5	OLG
chr1	86458184	86458185	Ptma	3UTR	C2U	3	NA	0.12	+	0	10	0.12	25	C2U	869880_1	5	OLG
chr1	86458184	86458185	Ptma	3UTR	C2U	8	NA	0.127	+	0	10	0.127	63	C2U	433720_1	6	OLG
chr1	86458184	86458185	Ptma	3UTR	C2U	3	NA	0.1304	+	0	10	0.1304	23	C2U	798582_1	5	OLG
chr1	86458184	86458185	Ptma	3UTR	C2U	2	NA	0.1333	+	0	10	0.1333	15	C2U	253113_1	5	OLG
chr1	86458184	86458185	Ptma	3UTR	C2U	4	NA	0.1333	+	0	10	0.1333	30	C2U	330603_1	6	OLG
chr1	86458184	86458185	Ptma	3UTR	C2U	6	NA	0.1333	+	0	10	0.1333	45	C2U	486254_1	5	OLG
chr1	86458184	86458185	Ptma	3UTR	C2U	8	NA	0.1333	+	0	10	0.1333	60	C2U	62028_1	6	OLG
chr1	86458184	86458185	Ptma	3UTR	C2U	7	NA	0.1346	+	0	10	0.1346	52	C2U	574473_1	6	OLG
chr1	86458184	86458185	Ptma	3UTR	C2U	3	NA	0.1364	+	0	10	0.1364	22	C2U	404119_1	6	OLG
chr1	86458184	86458185	Ptma	3UTR	C2U	3	NA	0.1364	+	0	10	0.1364	22	C2U	784235_1	6	OLG
chr1	86458184	86458185	Ptma	3UTR	C2U	11	NA	0.1375	+	0	10	0.1375	80	C2U	343365_1	5	OLG
chr1	86458184	86458185	Ptma	3UTR	C2U	6	NA	0.1395	+	0	10	0.1395	43	C2U	846604_1	6	OLG
chr1	86458184	86458185	Ptma	3UTR	C2U	6	NA	0.1429	+	0	10	0.1429	42	C2U	597802_1	5	OLG
chr1	86458184	86458185	Ptma	3UTR	C2U	4	NA	0.1429	+	0	10	0.1429	28	C2U	642970_1	6	OLG
chr1	86458184	86458185	Ptma	3UTR	C2U	5	NA	0.1515	+	0	10	0.1515	33	C2U	161971_1	5	OLG
chr1	86458184	86458185	Ptma	3UTR	C2U	7	NA	0.1522	+	0	10	0.1522	46	C2U	112443_1	6	OLG
chr1	86458184	86458185	Ptma	3UTR	C2U	7	NA	0.1522	+	0	10	0.1522	46	C2U	32249_1	6	OLG
chr1	86458184	86458185	Ptma	3UTR	C2U	4	NA	0.16	+	0	10	0.16	25	C2U	615645_1	6	OLG
chr1	86458184	86458185	Ptma	3UTR	C2U	7	NA	0.1667	+	0	10	0.1667	42	C2U	507342_1	2	OLG
chr1	86458184	86458185	Ptma	3UTR	C2U	7	NA	0.1707	+	0	10	0.1707	41	C2U	640804_1	6	OLG
chr1	86458184	86458185	Ptma	3UTR	C2U	4	NA	0.1739	+	0	10	0.1739	23	C2U	27645_1	6	OLG
chr1	86458184	86458185	Ptma	3UTR	C2U	8	NA	0.1778	+	0	10	0.1778	45	C2U	193421_1	5	OLG
chr1	86458184	86458185	Ptma	3UTR	C2U	10	NA	0.1786	+	0	10	0.1786	56	C2U	534909_1	5	OLG
chr1	86458184	86458185	Ptma	3UTR	C2U	7	NA	0.1795	+	0	10	0.1795	39	C2U	185929_1	2	OLG
chr1	86458184	86458185	Ptma	3UTR	C2U	14	NA	0.1795	+	0	10	0.1795	78	C2U	358558_1	6	OLG
chr1	86458184	86458185	Ptma	3UTR	C2U	8	NA	0.1818	+	0	10	0.1818	44	C2U	537962_1	5	OLG
chr1	86458184	86458185	Ptma	3UTR	C2U	5	NA	0.1852	+	0	10	0.1852	27	C2U	103092_1	5	OLG
chr1	86458184	86458185	Ptma	3UTR	C2U	12	NA	0.1905	+	0	10	0.1905	63	C2U	126789_1	6	OLG
chr1	86458184	86458185	Ptma	3UTR	C2U	5	NA	0.1923	+	0	10	0.1923	26	C2U	631188_1	2	OLG
chr1	86458184	86458185	Ptma	3UTR	C2U	6	NA	0.2069	+	0	10	0.2069	29	C2U	254669_1	13	OLG
chr1	86458184	86458185	Ptma	3UTR	C2U	7	NA	0.2121	+	0	10	0.2121	33	C2U	547288_1	5	OLG
chr1	86458184	86458185	Ptma	3UTR	C2U	10	NA	0.2128	+	0	10	0.2128	47	C2U	836293_1	13	OLG
chr1	86458184	86458185	Ptma	3UTR	C2U	6	NA	0.2143	+	0	10	0.2143	28	C2U	35721_1	5	OLG
chr1	86458184	86458185	Ptma	3UTR	C2U	3	NA	0.2143	+	0	10	0.2143	14	C2U	61375_1	5	OLG
chr1	86458184	86458185	Ptma	3UTR	C2U	7	NA	0.2188	+	0	10	0.2188	32	C2U	519811_1	5	OLG
chr1	86458184	86458185	Ptma	3UTR	C2U	4	NA	0.2222	+	0	10	0.2222	18	C2U	151864_1	2	OLG
chr1	86458184	86458185	Ptma	3UTR	C2U	6	NA	0.2222	+	0	10	0.2222	27	C2U	256188_1	2	OLG
chr1	86458184	86458185	Ptma	3UTR	C2U	10	NA	0.2222	+	0	10	0.2222	45	C2U	326285_1	2	OLG
chr1	86458184	86458185	Ptma	3UTR	C2U	10	NA	0.2222	+	0	10	0.2222	45	C2U	392726_1	5	OLG
chr1	86458184	86458185	Ptma	3UTR	C2U	7	NA	0.2258	+	0	10	0.2258	31	C2U	416173_1	7	OLG
chr1	86458184	86458185	Ptma	3UTR	C2U	14	NA	0.2258	+	0	10	0.2258	62	C2U	490517_1	5	OLG
chr1	86458184	86458185	Ptma	3UTR	C2U	11	NA	0.234	+	0	10	0.234	47	C2U	23291_1	6	OLG
chr1	86458184	86458185	Ptma	3UTR	C2U	9	NA	0.2432	+	0	10	0.2432	37	C2U	462484_1	6	OLG
chr1	86458184	86458185	Ptma	3UTR	C2U	3	NA	0.25	+	0	10	0.25	12	C2U	551281_1	5	OLG
chr1	86458184	86458185	Ptma	3UTR	C2U	3	NA	0.25	+	0	10	0.25	12	C2U	6628_1	6	OLG
chr1	86458184	86458185	Ptma	3UTR	C2U	4	NA	0.25	+	0	10	0.25	16	C2U	849212_1	5	OLG
chr1	86458184	86458185	Ptma	3UTR	C2U	9	NA	0.2571	+	0	10	0.2571	35	C2U	611532_1	2	OLG
chr1	86458184	86458185	Ptma	3UTR	C2U	8	NA	0.2581	+	0	10	0.2581	31	C2U	676745_1	2	OLG
chr1	86458184	86458185	Ptma	3UTR	C2U	7	NA	0.2593	+	0	10	0.2593	27	C2U	780744_1	5	OLG
chr1	86458184	86458185	Ptma	3UTR	C2U	5	NA	0.2632	+	0	10	0.2632	19	C2U	595443_1	5	OLG
chr1	86458184	86458185	Ptma	3UTR	C2U	5	NA	0.2632	+	0	10	0.2632	19	C2U	758229_1	7	OLG
chr1	86458184	86458185	Ptma	3UTR	C2U	19	NA	0.2639	+	0	10	0.2639	72	C2U	17565_1	2	OLG
chr1	86458184	86458185	Ptma	3UTR	C2U	13	NA	0.2708	+	0	10	0.2708	48	C2U	540094_1	3	OLG
chr1	86458184	86458185	Ptma	3UTR	C2U	3	NA	0.2727	+	0	10	0.2727	11	C2U	262993_1	5	OLG
chr1	86458184	86458185	Ptma	3UTR	C2U	12	NA	0.2791	+	0	10	0.2791	43	C2U	88110_1	2	OLG
chr1	86458184	86458185	Ptma	3UTR	C2U	8	NA	0.2857	+	0	10	0.2857	28	C2U	36225_1	5	OLG
chr1	86458184	86458185	Ptma	3UTR	C2U	8	NA	0.2857	+	0	10	0.2857	28	C2U	618337_1	5	OLG
chr1	86458184	86458185	Ptma	3UTR	C2U	9	NA	0.2903	+	0	10	0.2903	31	C2U	261130_1	5	OLG
chr1	86458184	86458185	Ptma	3UTR	C2U	7	NA	0.2917	+	0	10	0.2917	24	C2U	512046_1	5	OLG
chr1	86458184	86458185	Ptma	3UTR	C2U	5	NA	0.2941	+	0	10	0.2941	17	C2U	521712_1	3	OLG
chr1	86458184	86458185	Ptma	3UTR	C2U	3	NA	0.3	+	0	10	0.3	10	C2U	486621_1	6	OLG
chr1	86458184	86458185	Ptma	3UTR	C2U	3	NA	0.3	+	0	10	0.3	10	C2U	593382_1	5	OLG
chr1	86458184	86458185	Ptma	3UTR	C2U	12	NA	0.3	+	0	10	0.3	40	C2U	596185_1	7	OLG
chr1	86458184	86458185	Ptma	3UTR	C2U	10	NA	0.303	+	0	10	0.303	33	C2U	219081_1	2	OLG
chr1	86458184	86458185	Ptma	3UTR	C2U	4	NA	0.3077	+	0	10	0.3077	13	C2U	824774_1	5	OLG
chr1	86458184	86458185	Ptma	3UTR	C2U	7	NA	0.3182	+	0	10	0.3182	22	C2U	882216_1	5	OLG
chr1	86458184	86458185	Ptma	3UTR	C2U	8	NA	0.32	+	0	10	0.32	25	C2U	257876_1	2	OLG
chr1	86458184	86458185	Ptma	3UTR	C2U	9	NA	0.3333	+	0	10	0.3333	27	C2U	144251_1	3	OLG
chr1	86458184	86458185	Ptma	3UTR	C2U	20	NA	0.3333	+	0	10	0.3333	60	C2U	291415_1	2	OLG
chr1	86458184	86458185	Ptma	3UTR	C2U	11	NA	0.3333	+	0	10	0.3333	33	C2U	477286_1	3	OLG
chr1	86458184	86458185	Ptma	3UTR	C2U	11	NA	0.3438	+	0	10	0.3438	32	C2U	256485_1	3	OLG
chr1	86458184	86458185	Ptma	3UTR	C2U	14	NA	0.359	+	0	10	0.359	39	C2U	7264_1	3	OLG
chr1	86458184	86458185	Ptma	3UTR	C2U	4	NA	0.3636	+	0	10	0.3636	11	C2U	721653_1	13	OLG
chr1	86458184	86458185	Ptma	3UTR	C2U	9	NA	0.4091	+	0	10	0.4091	22	C2U	575898_1	3	OLG
chr1	86458184	86458185	Ptma	3UTR	C2U	8	NA	0.4211	+	0	10	0.4211	19	C2U	733427_1	2	OLG
chr1	86458184	86458185	Ptma	3UTR	C2U	11	NA	0.44	+	0	10	0.44	25	C2U	877295_1	6	OLG
chr1	86458184	86458185	Ptma	3UTR	C2U	6	NA	0.4615	+	0	10	0.4615	13	C2U	110268_1	5	OLG
chr1	86458184	86458185	Ptma	3UTR	C2U	7	NA	0.4667	+	0	10	0.4667	15	C2U	523466_1	5	OLG
chr1	86458184	86458185	Ptma	3UTR	C2U	9	NA	0.4737	+	0	10	0.4737	19	C2U	304349_1	3	OLG
chr1	86458184	86458185	Ptma	3UTR	C2U	9	NA	0.4737	+	0	10	0.4737	19	C2U	781769_1	6	OLG
chr1	86458184	86458185	Ptma	3UTR	C2U	13	NA	0.4815	+	0	10	0.4815	27	C2U	147943_1	5	OLG
chr1	86458184	86458185	Ptma	3UTR	C2U	9	NA	0.5	+	0	10	0.5	18	C2U	854961_1	2	OLG
chr1	86458184	86458185	Ptma	3UTR	C2U	10	NA	0.5263	+	0	10	0.5263	19	C2U	71511_1	5	OLG
chr1	86458184	86458185	Ptma	3UTR	C2U	12	NA	0.5714	+	0	10	0.5714	21	C2U	161159_1	6	OLG
chr1	86458184	86458185	Ptma	3UTR	C2U	10	NA	0.5882	+	0	10	0.5882	17	C2U	58415_1	3	OLG
chr1	86458184	86458185	Ptma	3UTR	C2U	12	NA	0.6	+	0	10	0.6	20	C2U	120206_1	5	OLG
chr1	86458184	86458185	Ptma	3UTR	C2U	14	NA	0.6087	+	0	10	0.6087	23	C2U	232913_1	3	OLG
chr1	86458184	86458185	Ptma	3UTR	C2U	13	NA	0.6842	+	0	10	0.6842	19	C2U	137072_1	2	OLG
chr1	86458184	86458185	Ptma	3UTR	C2U	13	NA	0.7222	+	0	10	0.7222	18	C2U	259766_1	6	OLG
chr1	86458187	86458188	Ptma	3UTR	C2U	8	NA	0.1455	+	0	10	0.1455	55	C2U	713978_1	6	OLG
chr1	86458187	86458188	Ptma	3UTR	C2U	13	NA	0.1512	+	0	10	0.1512	86	C2U	32727_1	6	OLG
chr1	86458187	86458188	Ptma	3UTR	C2U	6	NA	0.1579	+	0	10	0.1579	38	C2U	512866_1	6	OLG
chr1	86458187	86458188	Ptma	3UTR	C2U	6	NA	0.2222	+	0	10	0.2222	27	C2U	238539_1	6	OLG
chr1	86458187	86458188	Ptma	3UTR	C2U	6	NA	0.2222	+	0	10	0.2222	27	C2U	453881_1	5	OLG
chr1	86458187	86458188	Ptma	3UTR	C2U	7	NA	0.2258	+	0	10	0.2258	31	C2U	723140_1	6	OLG
chr1	86458187	86458188	Ptma	3UTR	C2U	10	NA	0.2381	+	0	10	0.2381	42	C2U	597802_1	5	OLG
chr1	86458187	86458188	Ptma	3UTR	C2U	5	NA	0.2381	+	0	10	0.2381	21	C2U	704075_1	6	OLG
chr1	86458187	86458188	Ptma	3UTR	C2U	6	NA	0.2727	+	0	10	0.2727	22	C2U	743410_1	5	OLG
chr1	86458187	86458188	Ptma	3UTR	C2U	12	NA	0.2927	+	0	10	0.2927	41	C2U	640804_1	6	OLG
chr1	86458187	86458188	Ptma	3UTR	C2U	10	NA	0.3226	+	0	10	0.3226	31	C2U	277706_1	3	OLG
chr1	86458187	86458188	Ptma	3UTR	C2U	12	NA	0.3429	+	0	10	0.3429	35	C2U	110695_1	3	OLG
chr1	86458187	86458188	Ptma	3UTR	C2U	6	NA	0.3529	+	0	10	0.3529	17	C2U	58415_1	3	OLG
chr1	86458187	86458188	Ptma	3UTR	C2U	5	NA	0.3571	+	0	10	0.3571	14	C2U	339502_1	6	OLG
chr1	86458187	86458188	Ptma	3UTR	C2U	7	NA	0.3684	+	0	10	0.3684	19	C2U	738339_1	5	OLG
chr1	86458187	86458188	Ptma	3UTR	C2U	10	NA	0.3704	+	0	10	0.3704	27	C2U	702545_1	3	OLG
chr1	86458187	86458188	Ptma	3UTR	C2U	7	NA	0.3889	+	0	10	0.3889	18	C2U	324218_1	6	OLG
chr1	86458187	86458188	Ptma	3UTR	C2U	15	NA	0.4054	+	0	10	0.4054	37	C2U	359487_1	5	OLG
chr1	86458187	86458188	Ptma	3UTR	C2U	12	NA	0.4615	+	0	10	0.4615	26	C2U	339051_1	5	OLG
chr1	86458187	86458188	Ptma	3UTR	C2U	10	NA	0.5556	+	0	10	0.5556	18	C2U	614496_1	6	OLG
chr1	86458187	86458188	Ptma	3UTR	C2U	9	NA	0.8182	+	0	10	0.8182	11	C2U	295091_1	2	OLG
chr1	86458195	86458196	Ptma	3UTR	C2U	9	NA	0.1957	+	0	10	0.1957	46	C2U	226408_1	2	OLG
chr1	86458195	86458196	Ptma	3UTR	C2U	5	NA	0.2083	+	0	10	0.2083	24	C2U	722186_1	2	OLG
chr1	86458195	86458196	Ptma	3UTR	C2U	9	NA	0.225	+	0	10	0.225	40	C2U	489348_1	2	OLG
chr1	86458195	86458196	Ptma	3UTR	C2U	5	NA	0.2273	+	0	10	0.2273	22	C2U	101398_1	2	OLG
chr1	86458195	86458196	Ptma	3UTR	C2U	5	NA	0.2273	+	0	10	0.2273	22	C2U	449897_1	2	OLG
chr1	86458195	86458196	Ptma	3UTR	C2U	10	NA	0.2778	+	0	10	0.2778	36	C2U	245200_1	2	OLG
chr1	86458195	86458196	Ptma	3UTR	C2U	8	NA	0.2857	+	0	10	0.2857	28	C2U	258912_1	2	OLG
chr1	86458195	86458196	Ptma	3UTR	C2U	6	NA	0.2857	+	0	10	0.2857	21	C2U	665807_1	2	OLG
chr1	86458195	86458196	Ptma	3UTR	C2U	9	NA	0.3214	+	0	10	0.3214	28	C2U	268140_1	2	OLG
chr1	86458195	86458196	Ptma	3UTR	C2U	7	NA	0.4118	+	0	10	0.4118	17	C2U	520069_1	2	OLG
chr1	86458195	86458196	Ptma	3UTR	C2U	8	NA	0.8	+	0	10	0.8	10	C2U	423456_1	5	OLG
chr1	86458199	86458200	Ptma	3UTR	C2U	2	NA	0.0952	+	0	10	0.0952	21	C2U	147613_1	7	OLG
chr1	86458199	86458200	Ptma	3UTR	C2U	8	NA	0.1053	+	0	10	0.1053	76	C2U	858580_1	7	OLG
chr1	86458199	86458200	Ptma	3UTR	C2U	9	NA	0.1139	+	0	10	0.1139	79	C2U	184206_1	7	OLG
chr1	86458199	86458200	Ptma	3UTR	C2U	8	NA	0.1143	+	0	10	0.1143	70	C2U	871183_1	13	OLG
chr1	86458199	86458200	Ptma	3UTR	C2U	4	NA	0.1379	+	0	10	0.1379	29	C2U	63268_1	7	OLG
chr1	86458199	86458200	Ptma	3UTR	C2U	9	NA	0.1429	+	0	10	0.1429	63	C2U	317451_1	7	OLG
chr1	86458199	86458200	Ptma	3UTR	C2U	4	NA	0.1739	+	0	10	0.1739	23	C2U	472281_1	13	OLG
chr1	86458199	86458200	Ptma	3UTR	C2U	6	NA	0.3	+	0	10	0.3	20	C2U	490081_1	7	OLG
chr1	86458199	86458200	Ptma	3UTR	C2U	6	NA	0.3	+	0	10	0.3	20	C2U	782274_1	5	OLG
chr1	86458199	86458200	Ptma	3UTR	C2U	5	NA	0.3333	+	0	10	0.3333	15	C2U	83766_1	6	OLG
chr1	86458199	86458200	Ptma	3UTR	C2U	12	NA	0.3529	+	0	10	0.3529	34	C2U	229368_1	2	OLG
chr1	86458199	86458200	Ptma	3UTR	C2U	9	NA	0.3913	+	0	10	0.3913	23	C2U	651935_1	5	OLG
chr1	86458199	86458200	Ptma	3UTR	C2U	8	NA	0.4211	+	0	10	0.4211	19	C2U	137072_1	2	OLG
chr1	86458199	86458200	Ptma	3UTR	C2U	6	NA	0.4286	+	0	10	0.4286	14	C2U	629372_1	6	OLG
chr1	86458199	86458200	Ptma	3UTR	C2U	10	NA	0.4348	+	0	10	0.4348	23	C2U	879732_1	5	OLG
chr1	86458199	86458200	Ptma	3UTR	C2U	14	NA	0.4828	+	0	10	0.4828	29	C2U	465380_1	2	OLG
chr1	86458199	86458200	Ptma	3UTR	C2U	11	NA	0.5	+	0	10	0.5	22	C2U	491707_1	5	OLG
chr1	86458199	86458200	Ptma	3UTR	C2U	23	NA	0.5	+	0	10	0.5	46	C2U	661157_1	5	OLG
chr1	86458199	86458200	Ptma	3UTR	C2U	9	NA	0.5294	+	0	10	0.5294	17	C2U	330787_1	2	OLG
chr1	86458205	86458206	Ptma	3UTR	C2U	5	NA	0.1923	+	0	10	0.1923	26	C2U	121303_1	2	OLG
chr1	86458205	86458206	Ptma	3UTR	C2U	3	NA	0.2	+	0	10	0.2	15	C2U	815173_1	2	OLG
chr1	86458205	86458206	Ptma	3UTR	C2U	4	NA	0.2	+	0	10	0.2	20	C2U	872920_1	2	OLG
chr1	86458205	86458206	Ptma	3UTR	C2U	9	NA	0.2045	+	0	10	0.2045	44	C2U	788614_1	2	OLG
chr1	86458205	86458206	Ptma	3UTR	C2U	6	NA	0.2069	+	0	10	0.2069	29	C2U	661839_1	3	OLG
chr1	86458205	86458206	Ptma	3UTR	C2U	7	NA	0.2121	+	0	10	0.2121	33	C2U	293030_1	3	OLG
chr1	86458205	86458206	Ptma	3UTR	C2U	9	NA	0.2143	+	0	10	0.2143	42	C2U	576756_1	3	OLG
chr1	86458205	86458206	Ptma	3UTR	C2U	6	NA	0.2143	+	0	10	0.2143	28	C2U	672016_1	3	OLG
chr1	86458205	86458206	Ptma	3UTR	C2U	5	NA	0.2174	+	0	10	0.2174	23	C2U	277049_1	2	OLG
chr1	86458205	86458206	Ptma	3UTR	C2U	6	NA	0.2308	+	0	10	0.2308	26	C2U	159631_1	2	OLG
chr1	86458205	86458206	Ptma	3UTR	C2U	4	NA	0.2353	+	0	10	0.2353	17	C2U	195152_1	2	OLG
chr1	86458205	86458206	Ptma	3UTR	C2U	12	NA	0.2353	+	0	10	0.2353	51	C2U	84534_1	3	OLG
chr1	86458205	86458206	Ptma	3UTR	C2U	10	NA	0.2381	+	0	10	0.2381	42	C2U	554202_1	3	OLG
chr1	86458205	86458206	Ptma	3UTR	C2U	10	NA	0.2439	+	0	10	0.2439	41	C2U	375185_1	7	OLG
chr1	86458205	86458206	Ptma	3UTR	C2U	6	NA	0.25	+	0	10	0.25	24	C2U	373317_1	7	OLG
chr1	86458205	86458206	Ptma	3UTR	C2U	7	NA	0.2593	+	0	10	0.2593	27	C2U	780744_1	5	OLG
chr1	86458205	86458206	Ptma	3UTR	C2U	10	NA	0.2632	+	0	10	0.2632	38	C2U	709994_1	2	OLG
chr1	86458205	86458206	Ptma	3UTR	C2U	9	NA	0.2647	+	0	10	0.2647	34	C2U	690078_1	2	OLG
chr1	86458205	86458206	Ptma	3UTR	C2U	5	NA	0.2778	+	0	10	0.2778	18	C2U	260111_1	6	OLG
chr1	86458205	86458206	Ptma	3UTR	C2U	19	NA	0.2836	+	0	10	0.2836	67	C2U	735605_1	3	OLG
chr1	86458205	86458206	Ptma	3UTR	C2U	9	NA	0.3	+	0	10	0.3	30	C2U	557666_1	5	OLG
chr1	86458205	86458206	Ptma	3UTR	C2U	17	NA	0.3091	+	0	10	0.3091	55	C2U	638695_1	7	OLG
chr1	86458205	86458206	Ptma	3UTR	C2U	10	NA	0.3125	+	0	10	0.3125	32	C2U	702545_1	3	OLG
chr1	86458205	86458206	Ptma	3UTR	C2U	10	NA	0.3125	+	0	10	0.3125	32	C2U	784235_1	6	OLG
chr1	86458205	86458206	Ptma	3UTR	C2U	9	NA	0.3333	+	0	10	0.3333	27	C2U	393300_1	2	OLG
chr1	86458205	86458206	Ptma	3UTR	C2U	5	NA	0.3333	+	0	10	0.3333	15	C2U	589098_1	2	OLG
chr1	86458205	86458206	Ptma	3UTR	C2U	5	NA	0.3571	+	0	10	0.3571	14	C2U	43849_1	7	OLG
chr1	86458205	86458206	Ptma	3UTR	C2U	11	NA	0.3667	+	0	10	0.3667	30	C2U	520795_1	2	OLG
chr1	86458205	86458206	Ptma	3UTR	C2U	8	NA	0.381	+	0	10	0.381	21	C2U	30175_1	13	OLG
chr1	86458205	86458206	Ptma	3UTR	C2U	5	NA	0.3846	+	0	10	0.3846	13	C2U	752253_1	5	OLG
chr1	86458205	86458206	Ptma	3UTR	C2U	7	NA	0.3889	+	0	10	0.3889	18	C2U	333375_1	2	OLG
chr1	86458205	86458206	Ptma	3UTR	C2U	6	NA	0.4	+	0	10	0.4	15	C2U	13752_1	7	OLG
chr1	86458205	86458206	Ptma	3UTR	C2U	9	NA	0.4091	+	0	10	0.4091	22	C2U	648074_1	3	OLG
chr1	86458205	86458206	Ptma	3UTR	C2U	13	NA	0.4194	+	0	10	0.4194	31	C2U	797895_1	5	OLG
chr1	86458205	86458206	Ptma	3UTR	C2U	16	NA	0.4324	+	0	10	0.4324	37	C2U	694804_1	5	OLG
chr1	86458205	86458206	Ptma	3UTR	C2U	9	NA	0.4737	+	0	10	0.4737	19	C2U	516510_1	3	OLG
chr1	86458205	86458206	Ptma	3UTR	C2U	11	NA	0.4783	+	0	10	0.4783	23	C2U	568322_1	3	OLG
chr1	86458205	86458206	Ptma	3UTR	C2U	11	NA	0.5	+	0	10	0.5	22	C2U	678384_1	5	OLG
chr1	86458205	86458206	Ptma	3UTR	C2U	7	NA	0.5385	+	0	10	0.5385	13	C2U	26380_1	5	OLG
chr1	86458205	86458206	Ptma	3UTR	C2U	6	NA	0.6	+	0	10	0.6	10	C2U	336460_1	2	OLG
chr1	86458206	86458207	Ptma	3UTR	C2U	10	NA	0.1111	+	0	10	0.1111	90	C2U	505595_1	13	OLG
chr1	86458206	86458207	Ptma	3UTR	C2U	4	NA	0.1818	+	0	10	0.1818	22	C2U	95409_1	2	OLG
chr1	86458206	86458207	Ptma	3UTR	C2U	7	NA	0.1842	+	0	10	0.1842	38	C2U	570555_1	3	OLG
chr1	86458206	86458207	Ptma	3UTR	C2U	5	NA	0.1923	+	0	10	0.1923	26	C2U	554629_1	2	OLG
chr1	86458206	86458207	Ptma	3UTR	C2U	6	NA	0.2	+	0	10	0.2	30	C2U	730328_1	3	OLG
chr1	86458206	86458207	Ptma	3UTR	C2U	13	NA	0.2	+	0	10	0.2	65	C2U	827134_1	6	OLG
chr1	86458206	86458207	Ptma	3UTR	C2U	6	NA	0.2069	+	0	10	0.2069	29	C2U	549959_1	12	OLG
chr1	86458206	86458207	Ptma	3UTR	C2U	5	NA	0.2083	+	0	10	0.2083	24	C2U	865714_1	2	OLG
chr1	86458206	86458207	Ptma	3UTR	C2U	9	NA	0.2143	+	0	10	0.2143	42	C2U	554202_1	3	OLG
chr1	86458206	86458207	Ptma	3UTR	C2U	7	NA	0.2188	+	0	10	0.2188	32	C2U	34381_1	3	OLG
chr1	86458206	86458207	Ptma	3UTR	C2U	8	NA	0.2286	+	0	10	0.2286	35	C2U	684370_1	3	OLG
chr1	86458206	86458207	Ptma	3UTR	C2U	12	NA	0.24	+	0	10	0.24	50	C2U	641555_1	13	OLG
chr1	86458206	86458207	Ptma	3UTR	C2U	4	NA	0.25	+	0	10	0.25	16	C2U	231178_1	3	OLG
chr1	86458206	86458207	Ptma	3UTR	C2U	10	NA	0.2564	+	0	10	0.2564	39	C2U	171181_1	2	OLG
chr1	86458206	86458207	Ptma	3UTR	C2U	6	NA	0.2609	+	0	10	0.2609	23	C2U	733427_1	2	OLG
chr1	86458206	86458207	Ptma	3UTR	C2U	7	NA	0.28	+	0	10	0.28	25	C2U	426583_1	6	OLG
chr1	86458206	86458207	Ptma	3UTR	C2U	13	NA	0.2826	+	0	10	0.2826	46	C2U	396840_1	7	OLG
chr1	86458206	86458207	Ptma	3UTR	C2U	19	NA	0.2923	+	0	10	0.2923	65	C2U	14977_1	2	OLG
chr1	86458206	86458207	Ptma	3UTR	C2U	16	NA	0.2963	+	0	10	0.2963	54	C2U	316993_1	6	OLG
chr1	86458206	86458207	Ptma	3UTR	C2U	11	NA	0.3056	+	0	10	0.3056	36	C2U	423351_1	7	OLG
chr1	86458206	86458207	Ptma	3UTR	C2U	4	NA	0.3077	+	0	10	0.3077	13	C2U	376853_1	2	OLG
chr1	86458206	86458207	Ptma	3UTR	C2U	15	NA	0.3333	+	0	10	0.3333	45	C2U	727839_1	3	OLG
chr1	86458206	86458207	Ptma	3UTR	C2U	5	NA	0.3571	+	0	10	0.3571	14	C2U	43849_1	7	OLG
chr1	86458206	86458207	Ptma	3UTR	C2U	11	NA	0.3667	+	0	10	0.3667	30	C2U	836074_1	2	OLG
chr1	86458206	86458207	Ptma	3UTR	C2U	10	NA	0.4348	+	0	10	0.4348	23	C2U	436508_1	5	OLG
chr1	86458206	86458207	Ptma	3UTR	C2U	10	NA	0.4348	+	0	10	0.4348	23	C2U	568322_1	3	OLG
chr1	86458206	86458207	Ptma	3UTR	C2U	7	NA	0.4375	+	0	10	0.4375	16	C2U	680601_1	5	OLG
chr1	86458206	86458207	Ptma	3UTR	C2U	11	NA	0.5	+	0	10	0.5	22	C2U	678384_1	5	OLG
chr1	86458210	86458211	Ptma	3UTR	C2U	8	NA	0.1143	+	0	10	0.1143	70	C2U	312416_1	12	OLG
chr1	86458210	86458211	Ptma	3UTR	C2U	5	NA	0.1562	+	0	10	0.1562	32	C2U	70673_1	6	OLG
chr1	86458210	86458211	Ptma	3UTR	C2U	5	NA	0.1786	+	0	10	0.1786	28	C2U	812398_1	3	OLG
chr1	86458210	86458211	Ptma	3UTR	C2U	15	NA	0.2143	+	0	10	0.2143	70	C2U	610280_1	3	OLG
chr1	86458210	86458211	Ptma	3UTR	C2U	9	NA	0.2647	+	0	10	0.2647	34	C2U	731605_1	3	OLG
chr1	86458210	86458211	Ptma	3UTR	C2U	12	NA	0.2727	+	0	10	0.2727	44	C2U	439225_1	2	OLG
chr1	86458210	86458211	Ptma	3UTR	C2U	9	NA	0.2812	+	0	10	0.2812	32	C2U	156177_1	2	OLG
chr1	86458210	86458211	Ptma	3UTR	C2U	11	NA	0.2821	+	0	10	0.2821	39	C2U	282373_1	6	OLG
chr1	86458210	86458211	Ptma	3UTR	C2U	9	NA	0.2903	+	0	10	0.2903	31	C2U	430803_1	2	OLG
chr1	86458210	86458211	Ptma	3UTR	C2U	8	NA	0.32	+	0	10	0.32	25	C2U	263947_1	2	OLG
chr1	86458210	86458211	Ptma	3UTR	C2U	13	NA	0.325	+	0	10	0.325	40	C2U	617088_1	2	OLG
chr1	86458210	86458211	Ptma	3UTR	C2U	14	NA	0.4828	+	0	10	0.4828	29	C2U	273292_1	2	OLG
chr1	86458214	86458215	Ptma	3UTR	C2U	5	NA	0.1613	+	0	10	0.1613	31	C2U	731314_1	6	OLG
chr1	86458214	86458215	Ptma	3UTR	C2U	8	NA	0.1633	+	0	10	0.1633	49	C2U	66232_1	13	OLG
chr1	86458214	86458215	Ptma	3UTR	C2U	11	NA	0.1642	+	0	10	0.1642	67	C2U	416488_1	7	OLG
chr1	86458214	86458215	Ptma	3UTR	C2U	6	NA	0.1667	+	0	10	0.1667	36	C2U	454646_1	6	OLG
chr1	86458214	86458215	Ptma	3UTR	C2U	7	NA	0.1667	+	0	10	0.1667	42	C2U	494176_1	13	OLG
chr1	86458214	86458215	Ptma	3UTR	C2U	4	NA	0.1667	+	0	10	0.1667	24	C2U	741087_1	6	OLG
chr1	86458214	86458215	Ptma	3UTR	C2U	5	NA	0.1667	+	0	10	0.1667	30	C2U	753392_1	7	OLG
chr1	86458214	86458215	Ptma	3UTR	C2U	14	NA	0.1772	+	0	10	0.1772	79	C2U	24449_1	7	OLG
chr1	86458214	86458215	Ptma	3UTR	C2U	13	NA	0.1781	+	0	10	0.1781	73	C2U	223847_1	6	OLG
chr1	86458214	86458215	Ptma	3UTR	C2U	10	NA	0.1818	+	0	10	0.1818	55	C2U	371430_1	2	OLG
chr1	86458214	86458215	Ptma	3UTR	C2U	6	NA	0.1818	+	0	10	0.1818	33	C2U	628820_1	3	OLG
chr1	86458214	86458215	Ptma	3UTR	C2U	6	NA	0.1818	+	0	10	0.1818	33	C2U	840150_1	3	OLG
chr1	86458214	86458215	Ptma	3UTR	C2U	9	NA	0.1837	+	0	10	0.1837	49	C2U	101548_1	6	OLG
chr1	86458214	86458215	Ptma	3UTR	C2U	5	NA	0.1852	+	0	10	0.1852	27	C2U	371908_1	7	OLG
chr1	86458214	86458215	Ptma	3UTR	C2U	11	NA	0.1864	+	0	10	0.1864	59	C2U	704437_1	7	OLG
chr1	86458214	86458215	Ptma	3UTR	C2U	12	NA	0.1875	+	0	10	0.1875	64	C2U	229368_1	2	OLG
chr1	86458214	86458215	Ptma	3UTR	C2U	9	NA	0.2	+	0	10	0.2	45	C2U	302794_1	2	OLG
chr1	86458214	86458215	Ptma	3UTR	C2U	9	NA	0.2	+	0	10	0.2	45	C2U	504188_1	6	OLG
chr1	86458214	86458215	Ptma	3UTR	C2U	7	NA	0.2	+	0	10	0.2	35	C2U	615027_1	7	OLG
chr1	86458214	86458215	Ptma	3UTR	C2U	8	NA	0.2	+	0	10	0.2	40	C2U	705815_1	2	OLG
chr1	86458214	86458215	Ptma	3UTR	C2U	6	NA	0.2	+	0	10	0.2	30	C2U	793735_1	5	OLG
chr1	86458214	86458215	Ptma	3UTR	C2U	12	NA	0.2069	+	0	10	0.2069	58	C2U	777692_1	6	OLG
chr1	86458214	86458215	Ptma	3UTR	C2U	22	NA	0.2095	+	0	10	0.2095	105	C2U	846379_1	3	OLG
chr1	86458214	86458215	Ptma	3UTR	C2U	8	NA	0.2162	+	0	10	0.2162	37	C2U	8726_1	5	OLG
chr1	86458214	86458215	Ptma	3UTR	C2U	5	NA	0.2174	+	0	10	0.2174	23	C2U	261560_1	2	OLG
chr1	86458214	86458215	Ptma	3UTR	C2U	5	NA	0.2174	+	0	10	0.2174	23	C2U	75036_1	6	OLG
chr1	86458214	86458215	Ptma	3UTR	C2U	8	NA	0.2222	+	0	10	0.2222	36	C2U	548515_1	2	OLG
chr1	86458214	86458215	Ptma	3UTR	C2U	9	NA	0.225	+	0	10	0.225	40	C2U	63764_1	5	OLG
chr1	86458214	86458215	Ptma	3UTR	C2U	9	NA	0.225	+	0	10	0.225	40	C2U	694429_1	2	OLG
chr1	86458214	86458215	Ptma	3UTR	C2U	6	NA	0.2308	+	0	10	0.2308	26	C2U	851572_1	5	OLG
chr1	86458214	86458215	Ptma	3UTR	C2U	7	NA	0.2333	+	0	10	0.2333	30	C2U	380690_1	6	OLG
chr1	86458214	86458215	Ptma	3UTR	C2U	11	NA	0.234	+	0	10	0.234	47	C2U	104436_1	3	OLG
chr1	86458214	86458215	Ptma	3UTR	C2U	8	NA	0.2353	+	0	10	0.2353	34	C2U	321550_1	5	OLG
chr1	86458214	86458215	Ptma	3UTR	C2U	4	NA	0.2353	+	0	10	0.2353	17	C2U	823514_1	2	OLG
chr1	86458214	86458215	Ptma	3UTR	C2U	7	NA	0.2414	+	0	10	0.2414	29	C2U	741097_1	2	OLG
chr1	86458214	86458215	Ptma	3UTR	C2U	15	NA	0.2542	+	0	10	0.2542	59	C2U	288080_1	5	OLG
chr1	86458214	86458215	Ptma	3UTR	C2U	17	NA	0.2698	+	0	10	0.2698	63	C2U	802680_1	7	OLG
chr1	86458214	86458215	Ptma	3UTR	C2U	7	NA	0.28	+	0	10	0.28	25	C2U	309089_1	6	OLG
chr1	86458214	86458215	Ptma	3UTR	C2U	10	NA	0.2857	+	0	10	0.2857	35	C2U	327713_1	3	OLG
chr1	86458214	86458215	Ptma	3UTR	C2U	17	NA	0.2881	+	0	10	0.2881	59	C2U	485532_1	2	OLG
chr1	86458214	86458215	Ptma	3UTR	C2U	9	NA	0.2903	+	0	10	0.2903	31	C2U	323002_1	3	OLG
chr1	86458214	86458215	Ptma	3UTR	C2U	17	NA	0.3148	+	0	10	0.3148	54	C2U	131349_1	2	OLG
chr1	86458214	86458215	Ptma	3UTR	C2U	4	NA	0.3333	+	0	10	0.3333	12	C2U	138899_1	13	OLG
chr1	86458214	86458215	Ptma	3UTR	C2U	8	NA	0.3333	+	0	10	0.3333	24	C2U	230069_1	2	OLG
chr1	86458214	86458215	Ptma	3UTR	C2U	5	NA	0.3333	+	0	10	0.3333	15	C2U	684303_1	2	OLG
chr1	86458214	86458215	Ptma	3UTR	C2U	13	NA	0.3421	+	0	10	0.3421	38	C2U	336353_1	5	OLG
chr1	86458214	86458215	Ptma	3UTR	C2U	12	NA	0.3429	+	0	10	0.3429	35	C2U	558177_1	2	OLG
chr1	86458214	86458215	Ptma	3UTR	C2U	10	NA	0.3448	+	0	10	0.3448	29	C2U	659955_1	2	OLG
chr1	86458214	86458215	Ptma	3UTR	C2U	13	NA	0.3514	+	0	10	0.3514	37	C2U	575898_1	3	OLG
chr1	86458214	86458215	Ptma	3UTR	C2U	15	NA	0.4054	+	0	10	0.4054	37	C2U	733220_1	5	OLG
chr1	86458214	86458215	Ptma	3UTR	C2U	9	NA	0.4091	+	0	10	0.4091	22	C2U	518623_1	2	OLG
chr1	86458214	86458215	Ptma	3UTR	C2U	7	NA	0.5	+	0	10	0.5	14	C2U	655641_1	6	OLG
chr1	86458214	86458215	Ptma	3UTR	C2U	13	NA	1	+	0	10	1	13	C2U	154641_1	5	OLG
chr1	86458215	86458216	Ptma	3UTR	C2U	4	NA	0.16	+	0	10	0.16	25	C2U	387158_1	6	OLG
chr1	86458215	86458216	Ptma	3UTR	C2U	10	NA	0.1724	+	0	10	0.1724	58	C2U	853020_1	7	OLG
chr1	86458215	86458216	Ptma	3UTR	C2U	4	NA	0.1739	+	0	10	0.1739	23	C2U	342648_1	6	OLG
chr1	86458215	86458216	Ptma	3UTR	C2U	12	NA	0.1739	+	0	10	0.1739	69	C2U	577193_1	7	OLG
chr1	86458215	86458216	Ptma	3UTR	C2U	9	NA	0.1765	+	0	10	0.1765	51	C2U	460169_1	2	OLG
chr1	86458215	86458216	Ptma	3UTR	C2U	4	NA	0.1905	+	0	10	0.1905	21	C2U	121499_1	2	OLG
chr1	86458215	86458216	Ptma	3UTR	C2U	8	NA	0.1905	+	0	10	0.1905	42	C2U	43849_1	7	OLG
chr1	86458215	86458216	Ptma	3UTR	C2U	7	NA	0.1944	+	0	10	0.1944	36	C2U	283773_1	3	OLG
chr1	86458215	86458216	Ptma	3UTR	C2U	8	NA	0.1951	+	0	10	0.1951	41	C2U	273759_1	5	OLG
chr1	86458215	86458216	Ptma	3UTR	C2U	8	NA	0.1951	+	0	10	0.1951	41	C2U	28866_1	2	OLG
chr1	86458215	86458216	Ptma	3UTR	C2U	9	NA	0.1957	+	0	10	0.1957	46	C2U	861783_1	3	OLG
chr1	86458215	86458216	Ptma	3UTR	C2U	10	NA	0.2	+	0	10	0.2	50	C2U	183308_1	12	OLG
chr1	86458215	86458216	Ptma	3UTR	C2U	10	NA	0.2	+	0	10	0.2	50	C2U	369172_1	2	OLG
chr1	86458215	86458216	Ptma	3UTR	C2U	2	NA	0.2	+	0	10	0.2	10	C2U	741135_1	3	OLG
chr1	86458215	86458216	Ptma	3UTR	C2U	10	NA	0.2041	+	0	10	0.2041	49	C2U	110605_1	6	OLG
chr1	86458215	86458216	Ptma	3UTR	C2U	10	NA	0.2041	+	0	10	0.2041	49	C2U	477286_1	3	OLG
chr1	86458215	86458216	Ptma	3UTR	C2U	7	NA	0.2059	+	0	10	0.2059	34	C2U	753599_1	2	OLG
chr1	86458215	86458216	Ptma	3UTR	C2U	6	NA	0.2143	+	0	10	0.2143	28	C2U	270148_1	3	OLG
chr1	86458215	86458216	Ptma	3UTR	C2U	6	NA	0.2143	+	0	10	0.2143	28	C2U	323671_1	3	OLG
chr1	86458215	86458216	Ptma	3UTR	C2U	6	NA	0.2222	+	0	10	0.2222	27	C2U	229521_1	5	OLG
chr1	86458215	86458216	Ptma	3UTR	C2U	4	NA	0.25	+	0	10	0.25	16	C2U	232987_1	6	OLG
chr1	86458215	86458216	Ptma	3UTR	C2U	6	NA	0.25	+	0	10	0.25	24	C2U	242445_1	3	OLG
chr1	86458215	86458216	Ptma	3UTR	C2U	6	NA	0.25	+	0	10	0.25	24	C2U	301495_1	5	OLG
chr1	86458215	86458216	Ptma	3UTR	C2U	5	NA	0.25	+	0	10	0.25	20	C2U	482977_1	5	OLG
chr1	86458215	86458216	Ptma	3UTR	C2U	6	NA	0.25	+	0	10	0.25	24	C2U	591805_1	2	OLG
chr1	86458215	86458216	Ptma	3UTR	C2U	11	NA	0.2558	+	0	10	0.2558	43	C2U	876195_1	5	OLG
chr1	86458215	86458216	Ptma	3UTR	C2U	5	NA	0.2778	+	0	10	0.2778	18	C2U	214382_1	7	OLG
chr1	86458215	86458216	Ptma	3UTR	C2U	11	NA	0.2895	+	0	10	0.2895	38	C2U	591119_1	2	OLG
chr1	86458215	86458216	Ptma	3UTR	C2U	11	NA	0.3056	+	0	10	0.3056	36	C2U	780761_1	2	OLG
chr1	86458215	86458216	Ptma	3UTR	C2U	12	NA	0.3333	+	0	10	0.3333	36	C2U	781747_1	3	OLG
chr1	86458215	86458216	Ptma	3UTR	C2U	8	NA	0.3478	+	0	10	0.3478	23	C2U	347015_1	5	OLG
chr1	86458215	86458216	Ptma	3UTR	C2U	4	NA	0.3636	+	0	10	0.3636	11	C2U	189388_1	5	OLG
chr1	86458215	86458216	Ptma	3UTR	C2U	7	NA	0.4375	+	0	10	0.4375	16	C2U	662292_1	6	OLG
chr1	86458215	86458216	Ptma	3UTR	C2U	15	NA	0.4688	+	0	10	0.4688	32	C2U	361078_1	2	OLG
chr1	86458215	86458216	Ptma	3UTR	C2U	6	NA	0.6	+	0	10	0.6	10	C2U	88205_1	2	OLG
chr1	86458221	86458222	Ptma	3UTR	C2U	12	NA	0.1446	+	0	10	0.1446	83	C2U	674632_1	13	OLG
chr1	86458221	86458222	Ptma	3UTR	C2U	12	NA	0.1481	+	0	10	0.1481	81	C2U	343411_1	3	OLG
chr1	86458221	86458222	Ptma	3UTR	C2U	7	NA	0.1489	+	0	10	0.1489	47	C2U	750394_1	3	OLG
chr1	86458221	86458222	Ptma	3UTR	C2U	8	NA	0.1509	+	0	10	0.1509	53	C2U	190265_1	3	OLG
chr1	86458221	86458222	Ptma	3UTR	C2U	8	NA	0.1569	+	0	10	0.1569	51	C2U	664257_1	3	OLG
chr1	86458221	86458222	Ptma	3UTR	C2U	2	NA	0.1667	+	0	10	0.1667	12	C2U	652227_1	2	OLG
chr1	86458221	86458222	Ptma	3UTR	C2U	8	NA	0.1702	+	0	10	0.1702	47	C2U	250049_1	2	OLG
chr1	86458221	86458222	Ptma	3UTR	C2U	5	NA	0.1724	+	0	10	0.1724	29	C2U	819399_1	3	OLG
chr1	86458221	86458222	Ptma	3UTR	C2U	17	NA	0.1735	+	0	10	0.1735	98	C2U	584012_1	13	OLG
chr1	86458221	86458222	Ptma	3UTR	C2U	18	NA	0.1782	+	0	10	0.1782	101	C2U	559066_1	13	OLG
chr1	86458221	86458222	Ptma	3UTR	C2U	5	NA	0.1786	+	0	10	0.1786	28	C2U	745040_1	2	OLG
chr1	86458221	86458222	Ptma	3UTR	C2U	14	NA	0.1818	+	0	10	0.1818	77	C2U	403681_1	7	OLG
chr1	86458221	86458222	Ptma	3UTR	C2U	8	NA	0.1818	+	0	10	0.1818	44	C2U	772197_1	7	OLG
chr1	86458221	86458222	Ptma	3UTR	C2U	12	NA	0.1875	+	0	10	0.1875	64	C2U	321847_1	2	OLG
chr1	86458221	86458222	Ptma	3UTR	C2U	4	NA	0.1905	+	0	10	0.1905	21	C2U	456564_1	2	OLG
chr1	86458221	86458222	Ptma	3UTR	C2U	17	NA	0.1954	+	0	10	0.1954	87	C2U	456667_1	2	OLG
chr1	86458221	86458222	Ptma	3UTR	C2U	7	NA	0.2	+	0	10	0.2	35	C2U	18353_1	5	OLG
chr1	86458221	86458222	Ptma	3UTR	C2U	3	NA	0.2	+	0	10	0.2	15	C2U	217330_1	6	OLG
chr1	86458221	86458222	Ptma	3UTR	C2U	4	NA	0.2	+	0	10	0.2	20	C2U	337815_1	3	OLG
chr1	86458221	86458222	Ptma	3UTR	C2U	6	NA	0.2	+	0	10	0.2	30	C2U	884485_1	2	OLG
chr1	86458221	86458222	Ptma	3UTR	C2U	9	NA	0.2045	+	0	10	0.2045	44	C2U	735484_1	3	OLG
chr1	86458221	86458222	Ptma	3UTR	C2U	11	NA	0.2075	+	0	10	0.2075	53	C2U	447217_1	3	OLG
chr1	86458221	86458222	Ptma	3UTR	C2U	16	NA	0.2105	+	0	10	0.2105	76	C2U	650501_1	6	OLG
chr1	86458221	86458222	Ptma	3UTR	C2U	11	NA	0.2157	+	0	10	0.2157	51	C2U	510751_1	6	OLG
chr1	86458221	86458222	Ptma	3UTR	C2U	8	NA	0.2222	+	0	10	0.2222	36	C2U	371815_1	2	OLG
chr1	86458221	86458222	Ptma	3UTR	C2U	5	NA	0.2273	+	0	10	0.2273	22	C2U	502597_1	7	OLG
chr1	86458221	86458222	Ptma	3UTR	C2U	6	NA	0.2308	+	0	10	0.2308	26	C2U	60913_1	2	OLG
chr1	86458221	86458222	Ptma	3UTR	C2U	14	NA	0.2333	+	0	10	0.2333	60	C2U	332938_1	5	OLG
chr1	86458221	86458222	Ptma	3UTR	C2U	11	NA	0.2391	+	0	10	0.2391	46	C2U	743410_1	5	OLG
chr1	86458221	86458222	Ptma	3UTR	C2U	8	NA	0.2424	+	0	10	0.2424	33	C2U	287084_1	2	OLG
chr1	86458221	86458222	Ptma	3UTR	C2U	8	NA	0.2424	+	0	10	0.2424	33	C2U	462857_1	3	OLG
chr1	86458221	86458222	Ptma	3UTR	C2U	14	NA	0.2642	+	0	10	0.2642	53	C2U	311125_1	5	OLG
chr1	86458221	86458222	Ptma	3UTR	C2U	11	NA	0.275	+	0	10	0.275	40	C2U	466471_1	6	OLG
chr1	86458221	86458222	Ptma	3UTR	C2U	11	NA	0.2821	+	0	10	0.2821	39	C2U	134333_1	3	OLG
chr1	86458221	86458222	Ptma	3UTR	C2U	9	NA	0.2903	+	0	10	0.2903	31	C2U	304277_1	5	OLG
chr1	86458221	86458222	Ptma	3UTR	C2U	10	NA	0.2941	+	0	10	0.2941	34	C2U	330363_1	2	OLG
chr1	86458221	86458222	Ptma	3UTR	C2U	18	NA	0.3158	+	0	10	0.3158	57	C2U	125490_1	6	OLG
chr1	86458221	86458222	Ptma	3UTR	C2U	18	NA	0.3462	+	0	10	0.3462	52	C2U	553383_1	5	OLG
chr1	86458221	86458222	Ptma	3UTR	C2U	14	NA	0.3784	+	0	10	0.3784	37	C2U	733220_1	5	OLG
chr1	86458221	86458222	Ptma	3UTR	C2U	5	NA	0.3846	+	0	10	0.3846	13	C2U	440809_1	6	OLG
chr1	86458221	86458222	Ptma	3UTR	C2U	10	NA	0.4545	+	0	10	0.4545	22	C2U	41450_1	5	OLG
chr1	86458221	86458222	Ptma	3UTR	C2U	9	NA	0.4737	+	0	10	0.4737	19	C2U	564760_1	5	OLG
chr1	86458221	86458222	Ptma	3UTR	C2U	7	NA	0.6364	+	0	10	0.6364	11	C2U	487034_1	6	OLG
chr1	86458235	86458236	Ptma	3UTR	C2U	9	NA	0.1525	+	0	10	0.1525	59	C2U	281150_1	6	OLG
chr1	86458235	86458236	Ptma	3UTR	C2U	9	NA	0.1525	+	0	10	0.1525	59	C2U	95287_1	5	OLG
chr1	86458235	86458236	Ptma	3UTR	C2U	2	NA	0.1538	+	0	10	0.1538	13	C2U	487034_1	6	OLG
chr1	86458235	86458236	Ptma	3UTR	C2U	5	NA	0.1562	+	0	10	0.1562	32	C2U	464955_1	5	OLG
chr1	86458235	86458236	Ptma	3UTR	C2U	8	NA	0.1569	+	0	10	0.1569	51	C2U	784235_1	6	OLG
chr1	86458235	86458236	Ptma	3UTR	C2U	17	NA	0.1574	+	0	10	0.1574	108	C2U	534909_1	5	OLG
chr1	86458235	86458236	Ptma	3UTR	C2U	12	NA	0.1579	+	0	10	0.1579	76	C2U	98366_1	6	OLG
chr1	86458235	86458236	Ptma	3UTR	C2U	14	NA	0.1591	+	0	10	0.1591	88	C2U	263225_1	6	OLG
chr1	86458235	86458236	Ptma	3UTR	C2U	7	NA	0.1591	+	0	10	0.1591	44	C2U	82067_1	2	OLG
chr1	86458235	86458236	Ptma	3UTR	C2U	5	NA	0.1613	+	0	10	0.1613	31	C2U	731314_1	6	OLG
chr1	86458235	86458236	Ptma	3UTR	C2U	11	NA	0.1618	+	0	10	0.1618	68	C2U	420159_1	3	OLG
chr1	86458235	86458236	Ptma	3UTR	C2U	10	NA	0.1695	+	0	10	0.1695	59	C2U	204423_1	6	OLG
chr1	86458235	86458236	Ptma	3UTR	C2U	16	NA	0.172	+	0	10	0.172	93	C2U	231547_1	7	OLG
chr1	86458235	86458236	Ptma	3UTR	C2U	16	NA	0.172	+	0	10	0.172	93	C2U	491024_1	3	OLG
chr1	86458235	86458236	Ptma	3UTR	C2U	10	NA	0.1724	+	0	10	0.1724	58	C2U	176680_1	2	OLG
chr1	86458235	86458236	Ptma	3UTR	C2U	11	NA	0.1803	+	0	10	0.1803	61	C2U	380581_1	7	OLG
chr1	86458235	86458236	Ptma	3UTR	C2U	10	NA	0.1818	+	0	10	0.1818	55	C2U	172799_1	2	OLG
chr1	86458235	86458236	Ptma	3UTR	C2U	5	NA	0.1852	+	0	10	0.1852	27	C2U	455871_1	5	OLG
chr1	86458235	86458236	Ptma	3UTR	C2U	8	NA	0.186	+	0	10	0.186	43	C2U	200326_1	2	OLG
chr1	86458235	86458236	Ptma	3UTR	C2U	6	NA	0.1875	+	0	10	0.1875	32	C2U	843224_1	7	OLG
chr1	86458235	86458236	Ptma	3UTR	C2U	7	NA	0.1892	+	0	10	0.1892	37	C2U	574333_1	2	OLG
chr1	86458235	86458236	Ptma	3UTR	C2U	7	NA	0.1892	+	0	10	0.1892	37	C2U	88708_1	2	OLG
chr1	86458235	86458236	Ptma	3UTR	C2U	5	NA	0.1923	+	0	10	0.1923	26	C2U	708316_1	7	OLG
chr1	86458235	86458236	Ptma	3UTR	C2U	11	NA	0.1964	+	0	10	0.1964	56	C2U	708404_1	5	OLG
chr1	86458235	86458236	Ptma	3UTR	C2U	15	NA	0.1974	+	0	10	0.1974	76	C2U	607804_1	2	OLG
chr1	86458235	86458236	Ptma	3UTR	C2U	4	NA	0.2	+	0	10	0.2	20	C2U	275396_1	5	OLG
chr1	86458235	86458236	Ptma	3UTR	C2U	12	NA	0.2	+	0	10	0.2	60	C2U	29670_1	5	OLG
chr1	86458235	86458236	Ptma	3UTR	C2U	18	NA	0.2045	+	0	10	0.2045	88	C2U	559414_1	2	OLG
chr1	86458235	86458236	Ptma	3UTR	C2U	6	NA	0.2143	+	0	10	0.2143	28	C2U	15510_1	5	OLG
chr1	86458235	86458236	Ptma	3UTR	C2U	3	NA	0.2143	+	0	10	0.2143	14	C2U	611808_1	5	OLG
chr1	86458235	86458236	Ptma	3UTR	C2U	5	NA	0.2174	+	0	10	0.2174	23	C2U	848363_1	5	OLG
chr1	86458235	86458236	Ptma	3UTR	C2U	10	NA	0.2273	+	0	10	0.2273	44	C2U	447982_1	2	OLG
chr1	86458235	86458236	Ptma	3UTR	C2U	10	NA	0.2273	+	0	10	0.2273	44	C2U	784646_1	5	OLG
chr1	86458235	86458236	Ptma	3UTR	C2U	10	NA	0.2326	+	0	10	0.2326	43	C2U	43821_1	3	OLG
chr1	86458235	86458236	Ptma	3UTR	C2U	4	NA	0.2353	+	0	10	0.2353	17	C2U	664673_1	2	OLG
chr1	86458235	86458236	Ptma	3UTR	C2U	5	NA	0.2381	+	0	10	0.2381	21	C2U	178108_1	3	OLG
chr1	86458235	86458236	Ptma	3UTR	C2U	7	NA	0.2414	+	0	10	0.2414	29	C2U	286767_1	5	OLG
chr1	86458235	86458236	Ptma	3UTR	C2U	7	NA	0.25	+	0	10	0.25	28	C2U	650179_1	6	OLG
chr1	86458235	86458236	Ptma	3UTR	C2U	9	NA	0.2571	+	0	10	0.2571	35	C2U	323002_1	3	OLG
chr1	86458235	86458236	Ptma	3UTR	C2U	17	NA	0.2742	+	0	10	0.2742	62	C2U	680042_1	3	OLG
chr1	86458235	86458236	Ptma	3UTR	C2U	5	NA	0.2778	+	0	10	0.2778	18	C2U	251018_1	5	OLG
chr1	86458235	86458236	Ptma	3UTR	C2U	13	NA	0.2826	+	0	10	0.2826	46	C2U	523139_1	5	OLG
chr1	86458235	86458236	Ptma	3UTR	C2U	10	NA	0.2857	+	0	10	0.2857	35	C2U	677298_1	5	OLG
chr1	86458235	86458236	Ptma	3UTR	C2U	9	NA	0.3103	+	0	10	0.3103	29	C2U	20893_1	5	OLG
chr1	86458235	86458236	Ptma	3UTR	C2U	9	NA	0.3103	+	0	10	0.3103	29	C2U	311999_1	5	OLG
chr1	86458235	86458236	Ptma	3UTR	C2U	11	NA	0.3235	+	0	10	0.3235	34	C2U	361644_1	6	OLG
chr1	86458235	86458236	Ptma	3UTR	C2U	11	NA	0.3333	+	0	10	0.3333	33	C2U	294920_1	6	OLG
chr1	86458235	86458236	Ptma	3UTR	C2U	14	NA	0.35	+	0	10	0.35	40	C2U	315044_1	6	OLG
chr1	86458236	86458237	Ptma	3UTR	C2U	10	NA	0.137	+	0	10	0.137	73	C2U	403959_1	3	OLG
chr1	86458236	86458237	Ptma	3UTR	C2U	10	NA	0.1639	+	0	10	0.1639	61	C2U	43113_1	2	OLG
chr1	86458236	86458237	Ptma	3UTR	C2U	4	NA	0.2353	+	0	10	0.2353	17	C2U	80127_1	2	OLG
chr1	86458240	86458241	Ptma	3UTR	C2U	15	NA	0.1364	+	0	10	0.1364	110	C2U	702245_1	5	OLG
chr1	86458240	86458241	Ptma	3UTR	C2U	7	NA	0.14	+	0	10	0.14	50	C2U	663140_1	7	OLG
chr1	86458240	86458241	Ptma	3UTR	C2U	10	NA	0.1449	+	0	10	0.1449	69	C2U	246289_1	5	OLG
chr1	86458240	86458241	Ptma	3UTR	C2U	7	NA	0.175	+	0	10	0.175	40	C2U	536133_1	2	OLG
chr1	86458240	86458241	Ptma	3UTR	C2U	7	NA	0.1944	+	0	10	0.1944	36	C2U	690105_1	6	OLG
chr1	86458240	86458241	Ptma	3UTR	C2U	12	NA	0.1967	+	0	10	0.1967	61	C2U	135581_1	2	OLG
chr1	86458240	86458241	Ptma	3UTR	C2U	9	NA	0.2195	+	0	10	0.2195	41	C2U	615028_1	5	OLG
chr1	86458240	86458241	Ptma	3UTR	C2U	7	NA	0.2258	+	0	10	0.2258	31	C2U	502597_1	7	OLG
chr1	86458240	86458241	Ptma	3UTR	C2U	7	NA	0.2333	+	0	10	0.2333	30	C2U	172582_1	6	OLG
chr1	86458240	86458241	Ptma	3UTR	C2U	14	NA	0.2414	+	0	10	0.2414	58	C2U	764610_1	6	OLG
chr1	86458245	86458246	Ptma	3UTR	C2U	10	NA	0.1493	+	0	10	0.1493	67	C2U	248109_1	13	OLG
chr1	86458245	86458246	Ptma	3UTR	C2U	6	NA	0.1579	+	0	10	0.1579	38	C2U	513460_1	13	OLG
chr1	86458245	86458246	Ptma	3UTR	C2U	11	NA	0.1618	+	0	10	0.1618	68	C2U	75356_1	2	OLG
chr1	86458245	86458246	Ptma	3UTR	C2U	7	NA	0.1628	+	0	10	0.1628	43	C2U	10660_1	2	OLG
chr1	86458245	86458246	Ptma	3UTR	C2U	17	NA	0.1635	+	0	10	0.1635	104	C2U	300970_1	2	OLG
chr1	86458245	86458246	Ptma	3UTR	C2U	10	NA	0.1639	+	0	10	0.1639	61	C2U	237134_1	2	OLG
chr1	86458245	86458246	Ptma	3UTR	C2U	7	NA	0.1667	+	0	10	0.1667	42	C2U	311387_1	2	OLG
chr1	86458245	86458246	Ptma	3UTR	C2U	4	NA	0.1667	+	0	10	0.1667	24	C2U	555782_1	2	OLG
chr1	86458245	86458246	Ptma	3UTR	C2U	6	NA	0.1667	+	0	10	0.1667	36	C2U	690278_1	5	OLG
chr1	86458245	86458246	Ptma	3UTR	C2U	13	NA	0.1688	+	0	10	0.1688	77	C2U	515821_1	2	OLG
chr1	86458245	86458246	Ptma	3UTR	C2U	10	NA	0.1695	+	0	10	0.1695	59	C2U	843129_1	6	OLG
chr1	86458245	86458246	Ptma	3UTR	C2U	8	NA	0.1702	+	0	10	0.1702	47	C2U	1966_1	2	OLG
chr1	86458245	86458246	Ptma	3UTR	C2U	8	NA	0.1702	+	0	10	0.1702	47	C2U	519811_1	5	OLG
chr1	86458245	86458246	Ptma	3UTR	C2U	14	NA	0.1707	+	0	10	0.1707	82	C2U	718561_1	6	OLG
chr1	86458245	86458246	Ptma	3UTR	C2U	11	NA	0.1719	+	0	10	0.1719	64	C2U	624448_1	5	OLG
chr1	86458245	86458246	Ptma	3UTR	C2U	5	NA	0.1724	+	0	10	0.1724	29	C2U	541101_1	5	OLG
chr1	86458245	86458246	Ptma	3UTR	C2U	10	NA	0.1724	+	0	10	0.1724	58	C2U	715721_1	3	OLG
chr1	86458245	86458246	Ptma	3UTR	C2U	5	NA	0.1724	+	0	10	0.1724	29	C2U	83766_1	6	OLG
chr1	86458245	86458246	Ptma	3UTR	C2U	7	NA	0.175	+	0	10	0.175	40	C2U	683810_1	5	OLG
chr1	86458245	86458246	Ptma	3UTR	C2U	10	NA	0.1754	+	0	10	0.1754	57	C2U	333725_1	5	OLG
chr1	86458245	86458246	Ptma	3UTR	C2U	7	NA	0.1795	+	0	10	0.1795	39	C2U	18353_1	5	OLG
chr1	86458245	86458246	Ptma	3UTR	C2U	9	NA	0.18	+	0	10	0.18	50	C2U	589617_1	6	OLG
chr1	86458245	86458246	Ptma	3UTR	C2U	11	NA	0.1803	+	0	10	0.1803	61	C2U	726243_1	5	OLG
chr1	86458245	86458246	Ptma	3UTR	C2U	10	NA	0.1818	+	0	10	0.1818	55	C2U	361815_1	2	OLG
chr1	86458245	86458246	Ptma	3UTR	C2U	6	NA	0.1818	+	0	10	0.1818	33	C2U	401883_1	5	OLG
chr1	86458245	86458246	Ptma	3UTR	C2U	6	NA	0.1818	+	0	10	0.1818	33	C2U	604012_1	2	OLG
chr1	86458245	86458246	Ptma	3UTR	C2U	4	NA	0.1818	+	0	10	0.1818	22	C2U	749275_1	5	OLG
chr1	86458245	86458246	Ptma	3UTR	C2U	10	NA	0.1818	+	0	10	0.1818	55	C2U	91632_1	5	OLG
chr1	86458245	86458246	Ptma	3UTR	C2U	10	NA	0.1852	+	0	10	0.1852	54	C2U	738146_1	2	OLG
chr1	86458245	86458246	Ptma	3UTR	C2U	5	NA	0.1852	+	0	10	0.1852	27	C2U	878771_1	5	OLG
chr1	86458245	86458246	Ptma	3UTR	C2U	8	NA	0.1905	+	0	10	0.1905	42	C2U	690920_1	5	OLG
chr1	86458245	86458246	Ptma	3UTR	C2U	9	NA	0.1915	+	0	10	0.1915	47	C2U	719432_1	6	OLG
chr1	86458245	86458246	Ptma	3UTR	C2U	10	NA	0.1923	+	0	10	0.1923	52	C2U	11827_1	13	OLG
chr1	86458245	86458246	Ptma	3UTR	C2U	5	NA	0.1923	+	0	10	0.1923	26	C2U	362466_1	5	OLG
chr1	86458245	86458246	Ptma	3UTR	C2U	13	NA	0.194	+	0	10	0.194	67	C2U	140937_1	5	OLG
chr1	86458245	86458246	Ptma	3UTR	C2U	10	NA	0.1961	+	0	10	0.1961	51	C2U	796957_1	13	OLG
chr1	86458245	86458246	Ptma	3UTR	C2U	7	NA	0.2	+	0	10	0.2	35	C2U	267211_1	5	OLG
chr1	86458245	86458246	Ptma	3UTR	C2U	10	NA	0.2	+	0	10	0.2	50	C2U	341840_1	5	OLG
chr1	86458245	86458246	Ptma	3UTR	C2U	16	NA	0.2051	+	0	10	0.2051	78	C2U	572034_1	5	OLG
chr1	86458245	86458246	Ptma	3UTR	C2U	7	NA	0.2059	+	0	10	0.2059	34	C2U	591264_1	5	OLG
chr1	86458245	86458246	Ptma	3UTR	C2U	13	NA	0.2063	+	0	10	0.2063	63	C2U	530920_1	2	OLG
chr1	86458245	86458246	Ptma	3UTR	C2U	16	NA	0.2078	+	0	10	0.2078	77	C2U	461413_1	7	OLG
chr1	86458245	86458246	Ptma	3UTR	C2U	5	NA	0.2083	+	0	10	0.2083	24	C2U	439773_1	3	OLG
chr1	86458245	86458246	Ptma	3UTR	C2U	13	NA	0.2097	+	0	10	0.2097	62	C2U	648549_1	6	OLG
chr1	86458245	86458246	Ptma	3UTR	C2U	8	NA	0.2105	+	0	10	0.2105	38	C2U	40639_1	2	OLG
chr1	86458245	86458246	Ptma	3UTR	C2U	12	NA	0.2143	+	0	10	0.2143	56	C2U	708404_1	5	OLG
chr1	86458245	86458246	Ptma	3UTR	C2U	21	NA	0.2165	+	0	10	0.2165	97	C2U	185929_1	2	OLG
chr1	86458245	86458246	Ptma	3UTR	C2U	7	NA	0.2188	+	0	10	0.2188	32	C2U	410427_1	5	OLG
chr1	86458245	86458246	Ptma	3UTR	C2U	7	NA	0.2188	+	0	10	0.2188	32	C2U	472636_1	3	OLG
chr1	86458245	86458246	Ptma	3UTR	C2U	9	NA	0.2195	+	0	10	0.2195	41	C2U	309906_1	3	OLG
chr1	86458245	86458246	Ptma	3UTR	C2U	6	NA	0.2222	+	0	10	0.2222	27	C2U	14110_1	6	OLG
chr1	86458245	86458246	Ptma	3UTR	C2U	4	NA	0.2222	+	0	10	0.2222	18	C2U	158530_1	5	OLG
chr1	86458245	86458246	Ptma	3UTR	C2U	10	NA	0.2222	+	0	10	0.2222	45	C2U	232559_1	6	OLG
chr1	86458245	86458246	Ptma	3UTR	C2U	24	NA	0.2222	+	0	10	0.2222	108	C2U	534909_1	5	OLG
chr1	86458245	86458246	Ptma	3UTR	C2U	16	NA	0.2222	+	0	10	0.2222	72	C2U	877433_1	2	OLG
chr1	86458245	86458246	Ptma	3UTR	C2U	17	NA	0.2237	+	0	10	0.2237	76	C2U	113094_1	6	OLG
chr1	86458245	86458246	Ptma	3UTR	C2U	7	NA	0.2258	+	0	10	0.2258	31	C2U	80389_1	5	OLG
chr1	86458245	86458246	Ptma	3UTR	C2U	15	NA	0.2273	+	0	10	0.2273	66	C2U	701687_1	6	OLG
chr1	86458245	86458246	Ptma	3UTR	C2U	38	NA	0.2289	+	0	10	0.2289	166	C2U	827268_1	13	OLG
chr1	86458245	86458246	Ptma	3UTR	C2U	18	NA	0.2308	+	0	10	0.2308	78	C2U	650441_1	6	OLG
chr1	86458245	86458246	Ptma	3UTR	C2U	16	NA	0.2319	+	0	10	0.2319	69	C2U	246289_1	5	OLG
chr1	86458245	86458246	Ptma	3UTR	C2U	13	NA	0.2321	+	0	10	0.2321	56	C2U	547089_1	2	OLG
chr1	86458245	86458246	Ptma	3UTR	C2U	13	NA	0.2321	+	0	10	0.2321	56	C2U	600440_1	5	OLG
chr1	86458245	86458246	Ptma	3UTR	C2U	7	NA	0.2333	+	0	10	0.2333	30	C2U	112609_1	5	OLG
chr1	86458245	86458246	Ptma	3UTR	C2U	7	NA	0.2333	+	0	10	0.2333	30	C2U	51770_1	5	OLG
chr1	86458245	86458246	Ptma	3UTR	C2U	14	NA	0.2333	+	0	10	0.2333	60	C2U	796185_1	6	OLG
chr1	86458245	86458246	Ptma	3UTR	C2U	11	NA	0.234	+	0	10	0.234	47	C2U	154202_1	6	OLG
chr1	86458245	86458246	Ptma	3UTR	C2U	11	NA	0.234	+	0	10	0.234	47	C2U	339051_1	5	OLG
chr1	86458245	86458246	Ptma	3UTR	C2U	4	NA	0.2353	+	0	10	0.2353	17	C2U	664673_1	2	OLG
chr1	86458245	86458246	Ptma	3UTR	C2U	15	NA	0.2459	+	0	10	0.2459	61	C2U	316304_1	6	OLG
chr1	86458245	86458246	Ptma	3UTR	C2U	13	NA	0.25	+	0	10	0.25	52	C2U	311125_1	5	OLG
chr1	86458245	86458246	Ptma	3UTR	C2U	7	NA	0.25	+	0	10	0.25	28	C2U	746916_1	2	OLG
chr1	86458245	86458246	Ptma	3UTR	C2U	5	NA	0.25	+	0	10	0.25	20	C2U	755809_1	2	OLG
chr1	86458245	86458246	Ptma	3UTR	C2U	13	NA	0.2549	+	0	10	0.2549	51	C2U	784235_1	6	OLG
chr1	86458245	86458246	Ptma	3UTR	C2U	9	NA	0.2571	+	0	10	0.2571	35	C2U	609491_1	5	OLG
chr1	86458245	86458246	Ptma	3UTR	C2U	7	NA	0.2692	+	0	10	0.2692	26	C2U	515993_1	3	OLG
chr1	86458245	86458246	Ptma	3UTR	C2U	23	NA	0.2706	+	0	10	0.2706	85	C2U	456667_1	2	OLG
chr1	86458245	86458246	Ptma	3UTR	C2U	6	NA	0.2727	+	0	10	0.2727	22	C2U	120853_1	5	OLG
chr1	86458245	86458246	Ptma	3UTR	C2U	11	NA	0.275	+	0	10	0.275	40	C2U	179735_1	2	OLG
chr1	86458245	86458246	Ptma	3UTR	C2U	16	NA	0.2759	+	0	10	0.2759	58	C2U	76183_1	5	OLG
chr1	86458245	86458246	Ptma	3UTR	C2U	27	NA	0.2812	+	0	10	0.2812	96	C2U	743376_1	6	OLG
chr1	86458245	86458246	Ptma	3UTR	C2U	9	NA	0.2812	+	0	10	0.2812	32	C2U	821720_1	2	OLG
chr1	86458245	86458246	Ptma	3UTR	C2U	23	NA	0.284	+	0	10	0.284	81	C2U	330603_1	6	OLG
chr1	86458245	86458246	Ptma	3UTR	C2U	25	NA	0.2907	+	0	10	0.2907	86	C2U	867991_1	2	OLG
chr1	86458245	86458246	Ptma	3UTR	C2U	8	NA	0.32	+	0	10	0.32	25	C2U	305182_1	5	OLG
chr1	86458245	86458246	Ptma	3UTR	C2U	10	NA	0.3226	+	0	10	0.3226	31	C2U	786129_1	3	OLG
chr1	86458245	86458246	Ptma	3UTR	C2U	11	NA	0.3235	+	0	10	0.3235	34	C2U	673657_1	5	OLG
chr1	86458245	86458246	Ptma	3UTR	C2U	14	NA	0.3256	+	0	10	0.3256	43	C2U	439432_1	5	OLG
chr1	86458245	86458246	Ptma	3UTR	C2U	16	NA	0.3265	+	0	10	0.3265	49	C2U	16706_1	2	OLG
chr1	86458245	86458246	Ptma	3UTR	C2U	17	NA	0.3333	+	0	10	0.3333	51	C2U	14823_1	6	OLG
chr1	86458245	86458246	Ptma	3UTR	C2U	10	NA	0.3333	+	0	10	0.3333	30	C2U	371908_1	7	OLG
chr1	86458245	86458246	Ptma	3UTR	C2U	18	NA	0.3462	+	0	10	0.3462	52	C2U	865714_1	2	OLG
chr1	86458245	86458246	Ptma	3UTR	C2U	8	NA	0.3478	+	0	10	0.3478	23	C2U	625883_1	6	OLG
chr1	86458245	86458246	Ptma	3UTR	C2U	11	NA	0.3548	+	0	10	0.3548	31	C2U	567510_1	6	OLG
chr1	86458245	86458246	Ptma	3UTR	C2U	6	NA	0.375	+	0	10	0.375	16	C2U	335677_1	3	OLG
chr1	86458245	86458246	Ptma	3UTR	C2U	12	NA	0.375	+	0	10	0.375	32	C2U	446376_1	2	OLG
chr1	86458245	86458246	Ptma	3UTR	C2U	16	NA	0.381	+	0	10	0.381	42	C2U	43821_1	3	OLG
chr1	86458245	86458246	Ptma	3UTR	C2U	12	NA	0.3871	+	0	10	0.3871	31	C2U	445882_1	5	OLG
chr1	86458245	86458246	Ptma	3UTR	C2U	16	NA	0.4103	+	0	10	0.4103	39	C2U	566626_1	5	OLG
chr1	86458245	86458246	Ptma	3UTR	C2U	17	NA	0.425	+	0	10	0.425	40	C2U	512046_1	5	OLG
chr1	86458245	86458246	Ptma	3UTR	C2U	14	NA	0.4667	+	0	10	0.4667	30	C2U	523105_1	3	OLG
chr1	86458245	86458246	Ptma	3UTR	C2U	10	NA	0.4762	+	0	10	0.4762	21	C2U	775276_1	6	OLG
chr1	86458245	86458246	Ptma	3UTR	C2U	13	NA	0.4815	+	0	10	0.4815	27	C2U	261560_1	2	OLG
chr1	86458245	86458246	Ptma	3UTR	C2U	40	NA	0.5195	+	0	10	0.5195	77	C2U	792967_1	3	OLG
chr1	86458282	86458283	Ptma	3UTR	C2U	6	NA	0.1364	+	0	10	0.1364	44	C2U	635700_1	6	OLG
chr1	86458282	86458283	Ptma	3UTR	C2U	7	NA	0.1795	+	0	10	0.1795	39	C2U	618337_1	5	OLG
chr1	86458282	86458283	Ptma	3UTR	C2U	5	NA	0.1923	+	0	10	0.1923	26	C2U	137215_1	7	OLG
chr1	86458282	86458283	Ptma	3UTR	C2U	4	NA	0.4	+	0	10	0.4	10	C2U	736843_1	5	OLG
chr1	86458283	86458284	Ptma	3UTR	C2U	2	NA	0.125	+	0	10	0.125	16	C2U	745040_1	2	OLG
chr1	86458283	86458284	Ptma	3UTR	C2U	4	NA	0.1429	+	0	10	0.1429	28	C2U	403212_1	2	OLG
chr1	86458283	86458284	Ptma	3UTR	C2U	3	NA	0.2	+	0	10	0.2	15	C2U	300194_1	6	OLG
chr1	86458283	86458284	Ptma	3UTR	C2U	8	NA	0.2581	+	0	10	0.2581	31	C2U	299924_1	2	OLG
chr1	86458283	86458284	Ptma	3UTR	C2U	3	NA	0.2727	+	0	10	0.2727	11	C2U	671699_1	3	OLG
chr1	86458307	86458308	Ptma	3UTR	C2U	4	NA	0.129	+	0	10	0.129	31	C2U	478703_1	7	OLG
chr1	86458307	86458308	Ptma	3UTR	C2U	11	NA	0.1375	+	0	10	0.1375	80	C2U	162630_1	7	OLG
chr1	86458307	86458308	Ptma	3UTR	C2U	6	NA	0.1395	+	0	10	0.1395	43	C2U	774923_1	7	OLG
chr1	86458307	86458308	Ptma	3UTR	C2U	5	NA	0.1471	+	0	10	0.1471	34	C2U	862103_1	7	OLG
chr1	86458307	86458308	Ptma	3UTR	C2U	4	NA	0.1481	+	0	10	0.1481	27	C2U	57870_1	7	OLG
chr1	86458307	86458308	Ptma	3UTR	C2U	6	NA	0.1538	+	0	10	0.1538	39	C2U	569085_1	6	OLG
chr1	86458307	86458308	Ptma	3UTR	C2U	2	NA	0.1538	+	0	10	0.1538	13	C2U	806698_1	6	OLG
chr1	86458307	86458308	Ptma	3UTR	C2U	5	NA	0.1562	+	0	10	0.1562	32	C2U	735103_1	7	OLG
chr1	86458307	86458308	Ptma	3UTR	C2U	11	NA	0.1618	+	0	10	0.1618	68	C2U	461295_1	7	OLG
chr1	86458307	86458308	Ptma	3UTR	C2U	7	NA	0.1667	+	0	10	0.1667	42	C2U	133023_1	13	OLG
chr1	86458307	86458308	Ptma	3UTR	C2U	11	NA	0.1667	+	0	10	0.1667	66	C2U	278165_1	7	OLG
chr1	86458307	86458308	Ptma	3UTR	C2U	2	NA	0.1667	+	0	10	0.1667	12	C2U	798241_1	6	OLG
chr1	86458307	86458308	Ptma	3UTR	C2U	2	NA	0.1818	+	0	10	0.1818	11	C2U	673733_1	6	OLG
chr1	86458307	86458308	Ptma	3UTR	C2U	2	NA	0.1818	+	0	10	0.1818	11	C2U	847040_1	7	OLG
chr1	86458307	86458308	Ptma	3UTR	C2U	3	NA	0.1875	+	0	10	0.1875	16	C2U	626539_1	2	OLG
chr1	86458307	86458308	Ptma	3UTR	C2U	9	NA	0.1915	+	0	10	0.1915	47	C2U	458264_1	3	OLG
chr1	86458307	86458308	Ptma	3UTR	C2U	6	NA	0.1935	+	0	10	0.1935	31	C2U	569365_1	7	OLG
chr1	86458307	86458308	Ptma	3UTR	C2U	2	NA	0.2	+	0	10	0.2	10	C2U	563720_1	2	OLG
chr1	86458307	86458308	Ptma	3UTR	C2U	6	NA	0.2	+	0	10	0.2	30	C2U	571418_1	2	OLG
chr1	86458307	86458308	Ptma	3UTR	C2U	5	NA	0.2	+	0	10	0.2	25	C2U	708815_1	2	OLG
chr1	86458307	86458308	Ptma	3UTR	C2U	3	NA	0.2	+	0	10	0.2	15	C2U	734213_1	7	OLG
chr1	86458307	86458308	Ptma	3UTR	C2U	8	NA	0.2105	+	0	10	0.2105	38	C2U	683629_1	7	OLG
chr1	86458307	86458308	Ptma	3UTR	C2U	3	NA	0.2143	+	0	10	0.2143	14	C2U	814703_1	5	OLG
chr1	86458307	86458308	Ptma	3UTR	C2U	10	NA	0.2174	+	0	10	0.2174	46	C2U	397450_1	6	OLG
chr1	86458307	86458308	Ptma	3UTR	C2U	3	NA	0.2308	+	0	10	0.2308	13	C2U	579098_1	5	OLG
chr1	86458307	86458308	Ptma	3UTR	C2U	9	NA	0.2432	+	0	10	0.2432	37	C2U	662611_1	2	OLG
chr1	86458307	86458308	Ptma	3UTR	C2U	7	NA	0.28	+	0	10	0.28	25	C2U	572771_1	2	OLG
chr1	86458307	86458308	Ptma	3UTR	C2U	7	NA	0.3043	+	0	10	0.3043	23	C2U	545133_1	13	OLG
chr1	86458307	86458308	Ptma	3UTR	C2U	5	NA	0.3125	+	0	10	0.3125	16	C2U	192008_1	2	OLG
chr1	86458307	86458308	Ptma	3UTR	C2U	7	NA	0.3333	+	0	10	0.3333	21	C2U	540957_1	6	OLG
chr1	86458307	86458308	Ptma	3UTR	C2U	7	NA	0.6364	+	0	10	0.6364	11	C2U	588471_1	3	OLG
chr1	86458307	86458308	Ptma	3UTR	C2U	12	NA	0.75	+	0	10	0.75	16	C2U	19129_1	3	OLG
chr1	86458308	86458309	Ptma	3UTR	C2U	5	NA	0.2941	+	0	10	0.2941	17	C2U	779507_1	2	OLG
chr1	86458308	86458309	Ptma	3UTR	C2U	11	NA	0.3056	+	0	10	0.3056	36	C2U	79379_1	2	OLG
chr1	86458308	86458309	Ptma	3UTR	C2U	7	NA	0.3182	+	0	10	0.3182	22	C2U	245039_1	3	OLG
chr1	86458308	86458309	Ptma	3UTR	C2U	12	NA	0.75	+	0	10	0.75	16	C2U	19129_1	3	OLG
chr1	86458313	86458314	Ptma	3UTR	C2U	6	NA	0.1364	+	0	10	0.1364	44	C2U	655425_1	7	OLG
chr1	86458313	86458314	Ptma	3UTR	C2U	4	NA	0.1538	+	0	10	0.1538	26	C2U	497380_1	7	OLG
chr1	86458313	86458314	Ptma	3UTR	C2U	6	NA	0.1818	+	0	10	0.1818	33	C2U	735103_1	7	OLG
chr1	86458313	86458314	Ptma	3UTR	C2U	5	NA	0.2083	+	0	10	0.2083	24	C2U	290480_1	13	OLG
chr1	86458313	86458314	Ptma	3UTR	C2U	6	NA	0.25	+	0	10	0.25	24	C2U	319348_1	13	OLG
chr1	86458313	86458314	Ptma	3UTR	C2U	7	NA	0.4375	+	0	10	0.4375	16	C2U	555782_1	2	OLG
chr1	86458313	86458314	Ptma	3UTR	C2U	13	NA	0.5909	+	0	10	0.5909	22	C2U	601998_1	6	OLG
chr1	86458313	86458314	Ptma	3UTR	C2U	12	NA	0.75	+	0	10	0.75	16	C2U	19129_1	3	OLG
chr1	86458317	86458318	Ptma	3UTR	C2U	6	NA	0.1132	+	0	10	0.1132	53	C2U	549959_1	12	OLG
chr1	86458317	86458318	Ptma	3UTR	C2U	14	NA	0.1186	+	0	10	0.1186	118	C2U	105844_1	12	OLG
chr1	86458317	86458318	Ptma	3UTR	C2U	11	NA	0.1429	+	0	10	0.1429	77	C2U	44375_1	6	OLG
chr1	86458317	86458318	Ptma	3UTR	C2U	4	NA	0.1481	+	0	10	0.1481	27	C2U	472281_1	13	OLG
chr1	86458317	86458318	Ptma	3UTR	C2U	6	NA	0.15	+	0	10	0.15	40	C2U	135813_1	6	OLG
chr1	86458317	86458318	Ptma	3UTR	C2U	5	NA	0.1515	+	0	10	0.1515	33	C2U	186329_1	6	OLG
chr1	86458317	86458318	Ptma	3UTR	C2U	4	NA	0.1538	+	0	10	0.1538	26	C2U	694342_1	6	OLG
chr1	86458317	86458318	Ptma	3UTR	C2U	7	NA	0.1556	+	0	10	0.1556	45	C2U	579350_1	6	OLG
chr1	86458317	86458318	Ptma	3UTR	C2U	3	NA	0.1667	+	0	10	0.1667	18	C2U	223625_1	6	OLG
chr1	86458317	86458318	Ptma	3UTR	C2U	5	NA	0.2	+	0	10	0.2	25	C2U	496294_1	6	OLG
chr1	86458317	86458318	Ptma	3UTR	C2U	6	NA	0.2069	+	0	10	0.2069	29	C2U	19227_1	2	OLG
chr1	86458317	86458318	Ptma	3UTR	C2U	9	NA	0.2308	+	0	10	0.2308	39	C2U	90450_1	3	OLG
chr1	86458317	86458318	Ptma	3UTR	C2U	5	NA	0.2381	+	0	10	0.2381	21	C2U	206675_1	2	OLG
chr1	86458317	86458318	Ptma	3UTR	C2U	15	NA	0.2542	+	0	10	0.2542	59	C2U	726243_1	5	OLG
chr1	86458317	86458318	Ptma	3UTR	C2U	9	NA	0.2571	+	0	10	0.2571	35	C2U	547366_1	2	OLG
chr1	86458317	86458318	Ptma	3UTR	C2U	7	NA	0.28	+	0	10	0.28	25	C2U	690105_1	6	OLG
chr1	86458317	86458318	Ptma	3UTR	C2U	8	NA	0.2857	+	0	10	0.2857	28	C2U	300194_1	6	OLG
chr1	86458317	86458318	Ptma	3UTR	C2U	4	NA	0.2857	+	0	10	0.2857	14	C2U	405752_1	5	OLG
chr1	86458317	86458318	Ptma	3UTR	C2U	6	NA	0.2857	+	0	10	0.2857	21	C2U	731489_1	2	OLG
chr1	86458317	86458318	Ptma	3UTR	C2U	13	NA	0.3023	+	0	10	0.3023	43	C2U	552005_1	3	OLG
chr1	86458317	86458318	Ptma	3UTR	C2U	11	NA	0.3056	+	0	10	0.3056	36	C2U	79379_1	2	OLG
chr1	86458317	86458318	Ptma	3UTR	C2U	9	NA	0.3103	+	0	10	0.3103	29	C2U	199100_1	6	OLG
chr1	86458317	86458318	Ptma	3UTR	C2U	9	NA	0.375	+	0	10	0.375	24	C2U	571418_1	2	OLG
chr1	86458317	86458318	Ptma	3UTR	C2U	8	NA	0.5	+	0	10	0.5	16	C2U	667625_1	2	OLG
chr1	86458317	86458318	Ptma	3UTR	C2U	9	NA	0.6429	+	0	10	0.6429	14	C2U	803622_1	6	OLG
chr1	86458321	86458322	Ptma	3UTR	C2U	4	NA	0.1538	+	0	10	0.1538	26	C2U	378353_1	2	OLG
chr1	86458321	86458322	Ptma	3UTR	C2U	18	NA	0.1607	+	0	10	0.1607	112	C2U	827268_1	13	OLG
chr1	86458321	86458322	Ptma	3UTR	C2U	12	NA	0.1739	+	0	10	0.1739	69	C2U	844563_1	2	OLG
chr1	86458321	86458322	Ptma	3UTR	C2U	7	NA	0.175	+	0	10	0.175	40	C2U	31102_1	2	OLG
chr1	86458321	86458322	Ptma	3UTR	C2U	6	NA	0.1765	+	0	10	0.1765	34	C2U	736378_1	2	OLG
chr1	86458321	86458322	Ptma	3UTR	C2U	8	NA	0.1818	+	0	10	0.1818	44	C2U	162638_1	2	OLG
chr1	86458321	86458322	Ptma	3UTR	C2U	4	NA	0.2222	+	0	10	0.2222	18	C2U	154362_1	3	OLG
chr1	86458321	86458322	Ptma	3UTR	C2U	10	NA	0.2222	+	0	10	0.2222	45	C2U	624726_1	2	OLG
chr1	86458321	86458322	Ptma	3UTR	C2U	3	NA	0.2308	+	0	10	0.2308	13	C2U	731264_1	3	OLG
chr1	86458321	86458322	Ptma	3UTR	C2U	10	NA	0.2381	+	0	10	0.2381	42	C2U	794148_1	6	OLG
chr1	86458321	86458322	Ptma	3UTR	C2U	9	NA	0.25	+	0	10	0.25	36	C2U	292943_1	2	OLG
chr1	86458321	86458322	Ptma	3UTR	C2U	4	NA	0.25	+	0	10	0.25	16	C2U	588283_1	6	OLG
chr1	86458321	86458322	Ptma	3UTR	C2U	6	NA	0.25	+	0	10	0.25	24	C2U	775962_1	7	OLG
chr1	86458321	86458322	Ptma	3UTR	C2U	8	NA	0.2581	+	0	10	0.2581	31	C2U	93592_1	3	OLG
chr1	86458321	86458322	Ptma	3UTR	C2U	6	NA	0.2609	+	0	10	0.2609	23	C2U	525121_1	3	OLG
chr1	86458321	86458322	Ptma	3UTR	C2U	12	NA	0.2857	+	0	10	0.2857	42	C2U	163833_1	13	OLG
chr1	86458321	86458322	Ptma	3UTR	C2U	8	NA	0.2963	+	0	10	0.2963	27	C2U	378043_1	7	OLG
chr1	86458321	86458322	Ptma	3UTR	C2U	13	NA	0.3023	+	0	10	0.3023	43	C2U	283773_1	3	OLG
chr1	86458321	86458322	Ptma	3UTR	C2U	4	NA	0.3077	+	0	10	0.3077	13	C2U	608006_1	6	OLG
chr1	86458321	86458322	Ptma	3UTR	C2U	13	NA	0.3171	+	0	10	0.3171	41	C2U	191146_1	3	OLG
chr1	86458321	86458322	Ptma	3UTR	C2U	8	NA	0.32	+	0	10	0.32	25	C2U	121499_1	2	OLG
chr1	86458321	86458322	Ptma	3UTR	C2U	13	NA	0.3421	+	0	10	0.3421	38	C2U	562052_1	6	OLG
chr1	86458321	86458322	Ptma	3UTR	C2U	9	NA	0.3462	+	0	10	0.3462	26	C2U	431521_1	7	OLG
chr1	86458321	86458322	Ptma	3UTR	C2U	9	NA	0.3462	+	0	10	0.3462	26	C2U	77060_1	6	OLG
chr1	86458321	86458322	Ptma	3UTR	C2U	5	NA	0.3571	+	0	10	0.3571	14	C2U	93245_1	5	OLG
chr1	86458332	86458333	Ptma	3UTR	C2U	3	NA	0.0909	+	0	10	0.0909	33	C2U	770935_1	7	OLG
chr1	86458332	86458333	Ptma	3UTR	C2U	4	NA	0.1111	+	0	10	0.1111	36	C2U	174199_1	5	OLG
chr1	86458332	86458333	Ptma	3UTR	C2U	4	NA	0.1143	+	0	10	0.1143	35	C2U	760693_1	5	OLG
chr1	86458332	86458333	Ptma	3UTR	C2U	2	NA	0.1333	+	0	10	0.1333	15	C2U	471181_1	5	OLG
chr1	86458332	86458333	Ptma	3UTR	C2U	3	NA	0.1667	+	0	10	0.1667	18	C2U	523105_1	3	OLG
chr1	86458332	86458333	Ptma	3UTR	C2U	6	NA	0.1818	+	0	10	0.1818	33	C2U	43821_1	3	OLG
chr1	86458332	86458333	Ptma	3UTR	C2U	8	NA	0.2105	+	0	10	0.2105	38	C2U	621806_1	3	OLG
chr1	86458332	86458333	Ptma	3UTR	C2U	8	NA	0.2222	+	0	10	0.2222	36	C2U	126948_1	5	OLG
chr1	86458332	86458333	Ptma	3UTR	C2U	5	NA	0.2778	+	0	10	0.2778	18	C2U	730616_1	5	OLG
chr1	86458332	86458333	Ptma	3UTR	C2U	9	NA	0.2812	+	0	10	0.2812	32	C2U	595618_1	6	OLG
chr1	86458332	86458333	Ptma	3UTR	C2U	7	NA	0.2917	+	0	10	0.2917	24	C2U	54089_1	5	OLG
chr1	86458350	86458351	Ptma	3UTR	C2U	2	NA	0.2	+	0	10	0.2	10	C2U	56560_1	2	OLG
chr1	86458350	86458351	Ptma	3UTR	C2U	8	NA	0.3333	+	0	10	0.3333	24	C2U	410752_1	5	OLG
chr1	86458350	86458351	Ptma	3UTR	C2U	11	NA	0.4231	+	0	10	0.4231	26	C2U	775299_1	2	OLG
chr1	86458378	86458379	Ptma	3UTR	C2U	4	NA	0.3333	+	0	10	0.3333	12	C2U	511267_1	2	OLG
chr1	86458378	86458379	Ptma	3UTR	C2U	6	NA	0.375	+	0	10	0.375	16	C2U	395423_1	2	OLG
chr1	86458378	86458379	Ptma	3UTR	C2U	4	NA	0.4	+	0	10	0.4	10	C2U	363885_1	2	OLG
chr1	86458382	86458383	Ptma	3UTR	C2U	8	NA	0.6667	+	0	10	0.6667	12	C2U	853474_1	13	OLG
chr1	87238207	87238208	Efhd1	3UTR	C2U	8	NA	0.7273	+	0	10	0.7273	11	C2U	185016_1	3	OLG
chr1	87238208	87238209	Efhd1	3UTR	C2U	12	NA	0.9231	+	0	10	0.9231	13	C2U	618772_1	6	OLG
chr1	87238212	87238213	Efhd1	3UTR	C2U	10	NA	1	+	0	10	1	10	C2U	745502_1	2	OLG
chr1	87238212	87238213	Efhd1	3UTR	C2U	10	NA	1	+	0	10	1	10	C2U	781454_1	7	OLG
chr1	87238235	87238236	Efhd1	3UTR	C2U	8	NA	0.2963	+	0	10	0.2963	27	C2U	814510_1	2	OLG
chr1	87238235	87238236	Efhd1	3UTR	C2U	5	NA	0.3571	+	0	10	0.3571	14	C2U	733427_1	2	OLG
chr1	87238235	87238236	Efhd1	3UTR	C2U	7	NA	0.3684	+	0	10	0.3684	19	C2U	875294_1	2	OLG
chr1	87238235	87238236	Efhd1	3UTR	C2U	5	NA	0.4545	+	0	10	0.4545	11	C2U	58511_1	2	OLG
chr1	87238235	87238236	Efhd1	3UTR	C2U	10	NA	0.4762	+	0	10	0.4762	21	C2U	116519_1	2	OLG
chr1	87238235	87238236	Efhd1	3UTR	C2U	6	NA	0.5	+	0	10	0.5	12	C2U	33406_1	2	OLG
chr1	87238235	87238236	Efhd1	3UTR	C2U	9	NA	0.5294	+	0	10	0.5294	17	C2U	752933_1	2	OLG
chr1	87238239	87238240	Efhd1	3UTR	C2U	7	NA	0.4375	+	0	10	0.4375	16	C2U	453957_1	2	OLG
chr1	87238239	87238240	Efhd1	3UTR	C2U	6	NA	0.4615	+	0	10	0.4615	13	C2U	360804_1	2	OLG
chr1	87238239	87238240	Efhd1	3UTR	C2U	9	NA	0.4737	+	0	10	0.4737	19	C2U	649703_1	2	OLG
chr1	87238239	87238240	Efhd1	3UTR	C2U	8	NA	0.7273	+	0	10	0.7273	11	C2U	120140_1	2	OLG
chr1	87238246	87238247	Efhd1	3UTR	C2U	5	NA	0.3571	+	0	10	0.3571	14	C2U	227244_1	2	OLG
chr1	87238246	87238247	Efhd1	3UTR	C2U	4	NA	0.3636	+	0	10	0.3636	11	C2U	219629_1	2	OLG
chr1	87238246	87238247	Efhd1	3UTR	C2U	7	NA	0.3889	+	0	10	0.3889	18	C2U	875294_1	2	OLG
chr1	87238246	87238247	Efhd1	3UTR	C2U	8	NA	0.4211	+	0	10	0.4211	19	C2U	826889_1	2	OLG
chr1	87238246	87238247	Efhd1	3UTR	C2U	12	NA	0.4444	+	0	10	0.4444	27	C2U	186857_1	2	OLG
chr1	87238246	87238247	Efhd1	3UTR	C2U	8	NA	0.4444	+	0	10	0.4444	18	C2U	768489_1	2	OLG
chr1	87238246	87238247	Efhd1	3UTR	C2U	7	NA	0.4667	+	0	10	0.4667	15	C2U	195680_1	2	OLG
chr1	87238246	87238247	Efhd1	3UTR	C2U	15	NA	0.5556	+	0	10	0.5556	27	C2U	157752_1	2	OLG
chr1	87238246	87238247	Efhd1	3UTR	C2U	9	NA	0.5625	+	0	10	0.5625	16	C2U	659398_1	2	OLG
chr1	87238246	87238247	Efhd1	3UTR	C2U	9	NA	0.6429	+	0	10	0.6429	14	C2U	580335_1	2	OLG
chr1	87238256	87238257	Efhd1	3UTR	C2U	9	NA	0.45	+	0	10	0.45	20	C2U	733599_1	2	OLG
chr1	87238256	87238257	Efhd1	3UTR	C2U	10	NA	1	+	0	10	1	10	C2U	288325_1	2	OLG
chr1	87238278	87238279	Efhd1	3UTR	C2U	6	NA	0.4286	+	0	10	0.4286	14	C2U	343982_1	7	OLG
chr1	87238278	87238279	Efhd1	3UTR	C2U	8	NA	0.5714	+	0	10	0.5714	14	C2U	656240_1	3	OLG
chr1	87238278	87238279	Efhd1	3UTR	C2U	8	NA	0.7273	+	0	10	0.7273	11	C2U	280258_1	3	OLG
chr1	87238279	87238280	Efhd1	3UTR	C2U	9	NA	0.6	+	0	10	0.6	15	C2U	559414_1	2	OLG
chr1	87238280	87238281	Efhd1	3UTR	C2U	7	NA	0.6364	+	0	10	0.6364	11	C2U	429690_1	2	OLG
chr1	87238285	87238286	Efhd1	3UTR	C2U	3	NA	0.2308	+	0	10	0.2308	13	C2U	82067_1	2	OLG
chr1	87238285	87238286	Efhd1	3UTR	C2U	9	NA	0.3333	+	0	10	0.3333	27	C2U	367339_1	2	OLG
chr1	87238285	87238286	Efhd1	3UTR	C2U	5	NA	0.3571	+	0	10	0.3571	14	C2U	580335_1	2	OLG
chr1	87238285	87238286	Efhd1	3UTR	C2U	4	NA	0.3636	+	0	10	0.3636	11	C2U	708815_1	2	OLG
chr1	87238285	87238286	Efhd1	3UTR	C2U	5	NA	0.3846	+	0	10	0.3846	13	C2U	476186_1	5	OLG
chr1	87238285	87238286	Efhd1	3UTR	C2U	14	NA	0.3889	+	0	10	0.3889	36	C2U	378739_1	5	OLG
chr1	87238285	87238286	Efhd1	3UTR	C2U	7	NA	0.5385	+	0	10	0.5385	13	C2U	29968_1	2	OLG
chr1	87238285	87238286	Efhd1	3UTR	C2U	12	NA	0.5455	+	0	10	0.5455	22	C2U	276546_1	3	OLG
chr1	87238285	87238286	Efhd1	3UTR	C2U	11	NA	0.5789	+	0	10	0.5789	19	C2U	810001_1	3	OLG
chr1	87238285	87238286	Efhd1	3UTR	C2U	7	NA	0.5833	+	0	10	0.5833	12	C2U	41408_1	2	OLG
chr1	87238285	87238286	Efhd1	3UTR	C2U	12	NA	0.6316	+	0	10	0.6316	19	C2U	123095_1	2	OLG
chr1	87238285	87238286	Efhd1	3UTR	C2U	9	NA	0.6923	+	0	10	0.6923	13	C2U	18753_1	3	OLG
chr1	87238285	87238286	Efhd1	3UTR	C2U	9	NA	0.9	+	0	10	0.9	10	C2U	764784_1	2	OLG
chr1	87238285	87238286	Efhd1	3UTR	C2U	11	NA	0.9167	+	0	10	0.9167	12	C2U	325978_1	2	OLG
chr1	87238285	87238286	Efhd1	3UTR	C2U	17	NA	1	+	0	10	1	17	C2U	279960_1	2	OLG
chr1	87238289	87238290	Efhd1	3UTR	C2U	6	NA	0.2069	+	0	10	0.2069	29	C2U	624726_1	2	OLG
chr1	87238289	87238290	Efhd1	3UTR	C2U	5	NA	0.25	+	0	10	0.25	20	C2U	580295_1	2	OLG
chr1	87238289	87238290	Efhd1	3UTR	C2U	9	NA	0.3103	+	0	10	0.3103	29	C2U	532948_1	2	OLG
chr1	87238289	87238290	Efhd1	3UTR	C2U	4	NA	0.3333	+	0	10	0.3333	12	C2U	542779_1	2	OLG
chr1	87238289	87238290	Efhd1	3UTR	C2U	8	NA	0.3636	+	0	10	0.3636	22	C2U	814510_1	2	OLG
chr1	87238289	87238290	Efhd1	3UTR	C2U	7	NA	0.3889	+	0	10	0.3889	18	C2U	365652_1	2	OLG
chr1	87238289	87238290	Efhd1	3UTR	C2U	11	NA	0.3929	+	0	10	0.3929	28	C2U	288325_1	2	OLG
chr1	87238289	87238290	Efhd1	3UTR	C2U	8	NA	0.4706	+	0	10	0.4706	17	C2U	484099_1	2	OLG
chr1	87238289	87238290	Efhd1	3UTR	C2U	12	NA	0.5217	+	0	10	0.5217	23	C2U	243133_1	2	OLG
chr1	87238289	87238290	Efhd1	3UTR	C2U	6	NA	0.6	+	0	10	0.6	10	C2U	686818_1	2	OLG
chr1	87238289	87238290	Efhd1	3UTR	C2U	9	NA	0.6429	+	0	10	0.6429	14	C2U	281107_1	2	OLG
chr1	87238289	87238290	Efhd1	3UTR	C2U	9	NA	0.6429	+	0	10	0.6429	14	C2U	403533_1	2	OLG
chr1	87238289	87238290	Efhd1	3UTR	C2U	9	NA	0.6429	+	0	10	0.6429	14	C2U	580335_1	2	OLG
chr1	87238289	87238290	Efhd1	3UTR	C2U	13	NA	0.65	+	0	10	0.65	20	C2U	277315_1	2	OLG
chr1	87238289	87238290	Efhd1	3UTR	C2U	16	NA	0.7273	+	0	10	0.7273	22	C2U	617088_1	2	OLG
chr1	87238289	87238290	Efhd1	3UTR	C2U	10	NA	0.7692	+	0	10	0.7692	13	C2U	382644_1	2	OLG
chr1	87238289	87238290	Efhd1	3UTR	C2U	19	NA	1	+	0	10	1	19	C2U	227244_1	2	OLG
chr1	87238289	87238290	Efhd1	3UTR	C2U	10	NA	1	+	0	10	1	10	C2U	745502_1	2	OLG
chr1	87238292	87238293	Efhd1	3UTR	C2U	3	NA	0.2143	+	0	10	0.2143	14	C2U	361815_1	2	OLG
chr1	87238292	87238293	Efhd1	3UTR	C2U	5	NA	0.2174	+	0	10	0.2174	23	C2U	599417_1	2	OLG
chr1	87238292	87238293	Efhd1	3UTR	C2U	12	NA	0.3	+	0	10	0.3	40	C2U	186857_1	2	OLG
chr1	87238292	87238293	Efhd1	3UTR	C2U	8	NA	0.4444	+	0	10	0.4444	18	C2U	390299_1	2	OLG
chr1	87238292	87238293	Efhd1	3UTR	C2U	8	NA	0.4706	+	0	10	0.4706	17	C2U	484099_1	2	OLG
chr1	87238292	87238293	Efhd1	3UTR	C2U	12	NA	0.5217	+	0	10	0.5217	23	C2U	243133_1	2	OLG
chr1	87238292	87238293	Efhd1	3UTR	C2U	16	NA	0.7273	+	0	10	0.7273	22	C2U	617088_1	2	OLG
chr1	87238292	87238293	Efhd1	3UTR	C2U	10	NA	1	+	0	10	1	10	C2U	833689_1	2	OLG
chr1	87238297	87238298	Efhd1	3UTR	C2U	7	NA	0.7	+	0	10	0.7	10	C2U	171170_1	3	OLG
chr1	87238321	87238322	Efhd1	3UTR	C2U	4	NA	0.1739	+	0	10	0.1739	23	C2U	343473_1	2	OLG
chr1	87238321	87238322	Efhd1	3UTR	C2U	5	NA	0.1923	+	0	10	0.1923	26	C2U	378353_1	2	OLG
chr1	87238321	87238322	Efhd1	3UTR	C2U	8	NA	0.2759	+	0	10	0.2759	29	C2U	549594_1	2	OLG
chr1	87238321	87238322	Efhd1	3UTR	C2U	9	NA	0.3103	+	0	10	0.3103	29	C2U	426152_1	2	OLG
chr1	87238321	87238322	Efhd1	3UTR	C2U	4	NA	0.3333	+	0	10	0.3333	12	C2U	558177_1	2	OLG
chr1	87238321	87238322	Efhd1	3UTR	C2U	9	NA	0.4286	+	0	10	0.4286	21	C2U	154764_1	2	OLG
chr1	87238321	87238322	Efhd1	3UTR	C2U	10	NA	0.5556	+	0	10	0.5556	18	C2U	736378_1	2	OLG
chr1	87238321	87238322	Efhd1	3UTR	C2U	10	NA	1	+	0	10	1	10	C2U	155385_1	5	OLG
chr1	87238321	87238322	Efhd1	3UTR	C2U	12	NA	1	+	0	10	1	12	C2U	799418_1	2	OLG
chr1	87238323	87238324	Efhd1	3UTR	C2U	5	NA	0.4167	+	0	10	0.4167	12	C2U	390421_1	7	OLG
chr1	87238323	87238324	Efhd1	3UTR	C2U	8	NA	0.6154	+	0	10	0.6154	13	C2U	814492_1	5	OLG
chr1	87238323	87238324	Efhd1	3UTR	C2U	7	NA	0.6364	+	0	10	0.6364	11	C2U	194620_1	7	OLG
chr1	87238323	87238324	Efhd1	3UTR	C2U	11	NA	0.6875	+	0	10	0.6875	16	C2U	120501_1	7	OLG
chr1	87238323	87238324	Efhd1	3UTR	C2U	11	NA	1	+	0	10	1	11	C2U	694804_1	5	OLG
chr1	87238325	87238326	Efhd1	3UTR	C2U	2	NA	0.1333	+	0	10	0.1333	15	C2U	23386_1	2	OLG
chr1	87238325	87238326	Efhd1	3UTR	C2U	3	NA	0.1579	+	0	10	0.1579	19	C2U	774215_1	2	OLG
chr1	87238325	87238326	Efhd1	3UTR	C2U	4	NA	0.2353	+	0	10	0.2353	17	C2U	165661_1	2	OLG
chr1	87238325	87238326	Efhd1	3UTR	C2U	5	NA	0.3571	+	0	10	0.3571	14	C2U	61777_1	2	OLG
chr1	87238325	87238326	Efhd1	3UTR	C2U	6	NA	0.375	+	0	10	0.375	16	C2U	195675_1	2	OLG
chr1	87238325	87238326	Efhd1	3UTR	C2U	9	NA	0.4091	+	0	10	0.4091	22	C2U	41170_1	2	OLG
chr1	87238326	87238327	Efhd1	3UTR	C2U	6	NA	0.3333	+	0	10	0.3333	18	C2U	142937_1	5	OLG
chr1	87238326	87238327	Efhd1	3UTR	C2U	9	NA	0.4091	+	0	10	0.4091	22	C2U	410978_1	5	OLG
chr1	87238326	87238327	Efhd1	3UTR	C2U	9	NA	0.4286	+	0	10	0.4286	21	C2U	842147_1	6	OLG
chr1	87238326	87238327	Efhd1	3UTR	C2U	7	NA	0.5	+	0	10	0.5	14	C2U	109246_1	2	OLG
chr1	87238326	87238327	Efhd1	3UTR	C2U	5	NA	0.5	+	0	10	0.5	10	C2U	698965_1	5	OLG
chr1	87238326	87238327	Efhd1	3UTR	C2U	12	NA	0.7059	+	0	10	0.7059	17	C2U	356937_1	6	OLG
chr1	87238327	87238328	Efhd1	3UTR	C2U	5	NA	0.2381	+	0	10	0.2381	21	C2U	70842_1	6	OLG
chr1	87238327	87238328	Efhd1	3UTR	C2U	6	NA	0.3	+	0	10	0.3	20	C2U	154063_1	6	OLG
chr1	87238327	87238328	Efhd1	3UTR	C2U	8	NA	0.381	+	0	10	0.381	21	C2U	153420_1	6	OLG
chr1	87238327	87238328	Efhd1	3UTR	C2U	12	NA	0.4138	+	0	10	0.4138	29	C2U	546952_1	6	OLG
chr1	87238327	87238328	Efhd1	3UTR	C2U	10	NA	0.4545	+	0	10	0.4545	22	C2U	725028_1	2	OLG
chr1	87238327	87238328	Efhd1	3UTR	C2U	11	NA	0.4583	+	0	10	0.4583	24	C2U	514110_1	5	OLG
chr1	87238327	87238328	Efhd1	3UTR	C2U	6	NA	0.5	+	0	10	0.5	12	C2U	123991_1	2	OLG
chr1	87238327	87238328	Efhd1	3UTR	C2U	14	NA	0.5385	+	0	10	0.5385	26	C2U	294298_1	5	OLG
chr1	87238327	87238328	Efhd1	3UTR	C2U	10	NA	0.5882	+	0	10	0.5882	17	C2U	823514_1	2	OLG
chr1	87238327	87238328	Efhd1	3UTR	C2U	12	NA	0.6667	+	0	10	0.6667	18	C2U	192795_1	3	OLG
chr1	87238327	87238328	Efhd1	3UTR	C2U	12	NA	0.6667	+	0	10	0.6667	18	C2U	302794_1	2	OLG
chr1	87238327	87238328	Efhd1	3UTR	C2U	17	NA	0.7391	+	0	10	0.7391	23	C2U	779950_1	5	OLG
chr1	87238327	87238328	Efhd1	3UTR	C2U	10	NA	1	+	0	10	1	10	C2U	7282_1	5	OLG
chr1	87238327	87238328	Efhd1	3UTR	C2U	11	NA	1	+	0	10	1	11	C2U	7669_1	7	OLG
chr1	87238334	87238335	Efhd1	3UTR	C2U	7	NA	0.2593	+	0	10	0.2593	27	C2U	297229_1	2	OLG
chr1	87238334	87238335	Efhd1	3UTR	C2U	9	NA	0.3214	+	0	10	0.3214	28	C2U	411342_1	2	OLG
chr1	87238334	87238335	Efhd1	3UTR	C2U	7	NA	0.4375	+	0	10	0.4375	16	C2U	810774_1	2	OLG
chr1	87238334	87238335	Efhd1	3UTR	C2U	11	NA	0.4583	+	0	10	0.4583	24	C2U	271921_1	2	OLG
chr1	87238334	87238335	Efhd1	3UTR	C2U	12	NA	0.5217	+	0	10	0.5217	23	C2U	243133_1	2	OLG
chr1	87238334	87238335	Efhd1	3UTR	C2U	13	NA	0.6842	+	0	10	0.6842	19	C2U	261130_1	5	OLG
chr1	87238334	87238335	Efhd1	3UTR	C2U	8	NA	0.8	+	0	10	0.8	10	C2U	63689_1	5	OLG
chr1	87238334	87238335	Efhd1	3UTR	C2U	11	NA	1	+	0	10	1	11	C2U	557666_1	5	OLG
chr1	87238347	87238348	Efhd1	3UTR	C2U	5	NA	0.2174	+	0	10	0.2174	23	C2U	142972_1	5	OLG
chr1	87238363	87238364	Efhd1	3UTR	C2U	9	NA	0.5625	+	0	10	0.5625	16	C2U	338617_1	2	OLG
chr1	87238363	87238364	Efhd1	3UTR	C2U	12	NA	1	+	0	10	1	12	C2U	255124_1	2	OLG
chr1	87238368	87238369	Efhd1	3UTR	C2U	4	NA	0.2857	+	0	10	0.2857	14	C2U	480238_1	6	OLG
chr1	87238368	87238369	Efhd1	3UTR	C2U	5	NA	0.5	+	0	10	0.5	10	C2U	877232_1	6	OLG
chr1	87238368	87238369	Efhd1	3UTR	C2U	10	NA	0.625	+	0	10	0.625	16	C2U	15613_1	6	OLG
chr1	87238370	87238371	Efhd1	3UTR	C2U	4	NA	0.3077	+	0	10	0.3077	13	C2U	648176_1	6	OLG
chr1	87238370	87238371	Efhd1	3UTR	C2U	5	NA	0.3333	+	0	10	0.3333	15	C2U	657779_1	6	OLG
chr1	87238370	87238371	Efhd1	3UTR	C2U	4	NA	0.3636	+	0	10	0.3636	11	C2U	447042_1	6	OLG
chr1	87238370	87238371	Efhd1	3UTR	C2U	5	NA	0.4167	+	0	10	0.4167	12	C2U	772870_1	6	OLG
chr1	87238370	87238371	Efhd1	3UTR	C2U	5	NA	0.4545	+	0	10	0.4545	11	C2U	131239_1	6	OLG
chr1	87238410	87238411	Efhd1	3UTR	C2U	7	NA	0.4375	+	0	10	0.4375	16	C2U	292943_1	2	OLG
chr1	88626045	88626046	Arl4c	3UTR	C2U	8	NA	0.6667	-	0	10	0.6667	12	C2U	105135_1	13	OLG
chr1	89082526	89082527	Sh3bp4	3UTR	C2U	11	NA	1	+	0	10	1	11	C2U	146142_1	12	OLG
chr1	89817172	89817173	Agap1	3UTR	C2U	11	NA	1	+	0	10	1	11	C2U	121588_1	2	OLG
chr1	89817173	89817174	Agap1	3UTR	C2U	10	NA	0.5556	+	0	10	0.5556	18	C2U	819322_1	2	OLG
chr1	89817173	89817174	Agap1	3UTR	C2U	16	NA	0.8	+	0	10	0.8	20	C2U	460260_1	2	OLG
chr1	89817173	89817174	Agap1	3UTR	C2U	12	NA	1	+	0	10	1	12	C2U	583097_1	2	OLG
chr1	89817173	89817174	Agap1	3UTR	C2U	15	NA	1	+	0	10	1	15	C2U	777094_1	2	OLG
chr1	89817327	89817328	Agap1	3UTR	C2U	6	NA	0.375	+	0	10	0.375	16	C2U	365475_1	7	OLG
chr1	89817327	89817328	Agap1	3UTR	C2U	5	NA	0.4167	+	0	10	0.4167	12	C2U	692378_1	7	OLG
chr1	89817327	89817328	Agap1	3UTR	C2U	11	NA	0.8462	+	0	10	0.8462	13	C2U	142484_1	2	OLG
chr1	89817328	89817329	Agap1	3UTR	C2U	7	NA	0.5	+	0	10	0.5	14	C2U	294158_1	2	OLG
chr1	89817331	89817332	Agap1	3UTR	C2U	15	NA	1	+	0	10	1	15	C2U	782249_1	7	OLG
chr1	89817343	89817344	Agap1	3UTR	C2U	9	NA	0.5	+	0	10	0.5	18	C2U	165661_1	2	OLG
chr1	89817343	89817344	Agap1	3UTR	C2U	8	NA	0.6667	+	0	10	0.6667	12	C2U	652237_1	2	OLG
chr1	89817343	89817344	Agap1	3UTR	C2U	14	NA	1	+	0	10	1	14	C2U	37126_1	2	OLG
chr1	89817343	89817344	Agap1	3UTR	C2U	11	NA	1	+	0	10	1	11	C2U	876686_1	2	OLG
chr1	89817425	89817426	Agap1	3UTR	C2U	9	NA	0.9	+	0	10	0.9	10	C2U	760719_1	6	OLG
chr1	89817429	89817430	Agap1	3UTR	C2U	7	NA	0.3043	+	0	10	0.3043	23	C2U	650391_1	7	OLG
chr1	89817429	89817430	Agap1	3UTR	C2U	7	NA	0.5385	+	0	10	0.5385	13	C2U	264671_1	7	OLG
chr1	89817436	89817437	Agap1	3UTR	C2U	6	NA	0.3158	+	0	10	0.3158	19	C2U	1180_1	3	OLG
chr1	89817436	89817437	Agap1	3UTR	C2U	6	NA	0.4286	+	0	10	0.4286	14	C2U	364299_1	6	OLG
chr1	89822758	89822759	Agap1	3UTR	C2U	11	NA	0.8462	+	0	10	0.8462	13	C2U	808013_1	6	OLG
chr1	89822758	89822759	Agap1	3UTR	C2U	12	NA	0.9231	+	0	10	0.9231	13	C2U	608202_1	2	OLG
chr1	89822758	89822759	Agap1	3UTR	C2U	14	NA	1	+	0	10	1	14	C2U	16706_1	2	OLG
chr1	89822758	89822759	Agap1	3UTR	C2U	10	NA	1	+	0	10	1	10	C2U	462484_1	6	OLG
chr1	89822764	89822765	Agap1	3UTR	C2U	6	NA	0.1935	+	0	10	0.1935	31	C2U	647466_1	2	OLG
chr1	89822764	89822765	Agap1	3UTR	C2U	8	NA	0.4444	+	0	10	0.4444	18	C2U	403533_1	2	OLG
chr1	89822775	89822776	Agap1	3UTR	C2U	13	NA	0.8667	+	0	10	0.8667	15	C2U	162935_1	7	OLG
chr1	89822783	89822784	Agap1	3UTR	C2U	8	NA	0.5	+	0	10	0.5	16	C2U	520206_1	2	OLG
chr1	89822783	89822784	Agap1	3UTR	C2U	15	NA	1	+	0	10	1	15	C2U	200326_1	2	OLG
chr1	89822790	89822791	Agap1	3UTR	C2U	12	NA	1	+	0	10	1	12	C2U	883030_1	2	OLG
chr1	89822795	89822796	Agap1	3UTR	C2U	6	NA	0.2222	+	0	10	0.2222	27	C2U	614589_1	5	OLG
chr1	89822795	89822796	Agap1	3UTR	C2U	7	NA	0.3889	+	0	10	0.3889	18	C2U	843000_1	5	OLG
chr1	89822795	89822796	Agap1	3UTR	C2U	5	NA	0.4167	+	0	10	0.4167	12	C2U	50833_1	2	OLG
chr1	89822795	89822796	Agap1	3UTR	C2U	12	NA	0.4615	+	0	10	0.4615	26	C2U	821929_1	5	OLG
chr1	89822795	89822796	Agap1	3UTR	C2U	9	NA	0.6	+	0	10	0.6	15	C2U	218785_1	2	OLG
chr1	89822795	89822796	Agap1	3UTR	C2U	11	NA	0.6875	+	0	10	0.6875	16	C2U	413963_1	2	OLG
chr1	89822795	89822796	Agap1	3UTR	C2U	15	NA	1	+	0	10	1	15	C2U	200326_1	2	OLG
chr1	89822796	89822797	Agap1	3UTR	C2U	4	NA	0.4	+	0	10	0.4	10	C2U	764277_1	2	OLG
chr1	89822796	89822797	Agap1	3UTR	C2U	11	NA	0.6875	+	0	10	0.6875	16	C2U	413963_1	2	OLG
chr1	89822798	89822799	Agap1	3UTR	C2U	3	NA	0.3	+	0	10	0.3	10	C2U	137377_1	7	OLG
chr1	89822798	89822799	Agap1	3UTR	C2U	5	NA	0.3571	+	0	10	0.3571	14	C2U	83071_1	6	OLG
chr1	89822798	89822799	Agap1	3UTR	C2U	7	NA	0.3889	+	0	10	0.3889	18	C2U	880664_1	3	OLG
chr1	89822798	89822799	Agap1	3UTR	C2U	11	NA	0.4231	+	0	10	0.4231	26	C2U	570982_1	6	OLG
chr1	89822798	89822799	Agap1	3UTR	C2U	8	NA	0.6154	+	0	10	0.6154	13	C2U	261414_1	6	OLG
chr1	89822798	89822799	Agap1	3UTR	C2U	9	NA	0.8182	+	0	10	0.8182	11	C2U	760690_1	3	OLG
chr1	89822799	89822800	Agap1	3UTR	C2U	5	NA	0.4167	+	0	10	0.4167	12	C2U	425432_1	3	OLG
chr1	89822800	89822801	Agap1	3UTR	C2U	8	NA	0.3077	+	0	10	0.3077	26	C2U	787966_1	3	OLG
chr1	89822800	89822801	Agap1	3UTR	C2U	10	NA	1	+	0	10	1	10	C2U	182476_1	3	OLG
chr1	89822806	89822807	Agap1	3UTR	C2U	4	NA	0.1739	+	0	10	0.1739	23	C2U	755849_1	2	OLG
chr1	89822806	89822807	Agap1	3UTR	C2U	4	NA	0.2105	+	0	10	0.2105	19	C2U	550844_1	2	OLG
chr1	89822806	89822807	Agap1	3UTR	C2U	4	NA	0.2222	+	0	10	0.2222	18	C2U	23386_1	2	OLG
chr1	89822806	89822807	Agap1	3UTR	C2U	5	NA	0.25	+	0	10	0.25	20	C2U	631188_1	2	OLG
chr1	89822806	89822807	Agap1	3UTR	C2U	5	NA	0.3125	+	0	10	0.3125	16	C2U	34881_1	2	OLG
chr1	89822806	89822807	Agap1	3UTR	C2U	8	NA	0.8	+	0	10	0.8	10	C2U	482653_1	2	OLG
chr1	89822806	89822807	Agap1	3UTR	C2U	8	NA	0.8	+	0	10	0.8	10	C2U	580478_1	2	OLG
chr1	89822824	89822825	Agap1	3UTR	C2U	5	NA	0.3571	+	0	10	0.3571	14	C2U	3950_1	2	OLG
chr1	89822824	89822825	Agap1	3UTR	C2U	6	NA	0.4615	+	0	10	0.4615	13	C2U	476832_1	2	OLG
chr1	89822824	89822825	Agap1	3UTR	C2U	6	NA	0.5	+	0	10	0.5	12	C2U	822402_1	2	OLG
chr1	89822824	89822825	Agap1	3UTR	C2U	6	NA	0.6	+	0	10	0.6	10	C2U	495801_1	2	OLG
chr1	89822824	89822825	Agap1	3UTR	C2U	9	NA	0.6429	+	0	10	0.6429	14	C2U	659955_1	2	OLG
chr1	89822828	89822829	Agap1	3UTR	C2U	5	NA	0.3333	+	0	10	0.3333	15	C2U	181003_1	7	OLG
chr1	89822836	89822837	Agap1	3UTR	C2U	6	NA	0.6	+	0	10	0.6	10	C2U	877232_1	6	OLG
chr1	89822836	89822837	Agap1	3UTR	C2U	11	NA	0.6111	+	0	10	0.6111	18	C2U	543880_1	6	OLG
chr1	89822842	89822843	Agap1	3UTR	C2U	8	NA	0.2581	+	0	10	0.2581	31	C2U	395371_1	2	OLG
chr1	89822842	89822843	Agap1	3UTR	C2U	5	NA	0.2632	+	0	10	0.2632	19	C2U	659955_1	2	OLG
chr1	89822842	89822843	Agap1	3UTR	C2U	8	NA	0.2963	+	0	10	0.2963	27	C2U	549594_1	2	OLG
chr1	89822842	89822843	Agap1	3UTR	C2U	4	NA	0.3333	+	0	10	0.3333	12	C2U	755809_1	2	OLG
chr1	89822842	89822843	Agap1	3UTR	C2U	6	NA	0.4	+	0	10	0.4	15	C2U	152435_1	7	OLG
chr1	89822842	89822843	Agap1	3UTR	C2U	7	NA	0.4375	+	0	10	0.4375	16	C2U	678220_1	7	OLG
chr1	89822842	89822843	Agap1	3UTR	C2U	11	NA	0.44	+	0	10	0.44	25	C2U	277736_1	2	OLG
chr1	89822842	89822843	Agap1	3UTR	C2U	5	NA	0.4545	+	0	10	0.4545	11	C2U	569085_1	6	OLG
chr1	89822842	89822843	Agap1	3UTR	C2U	9	NA	0.4737	+	0	10	0.4737	19	C2U	683500_1	2	OLG
chr1	89822842	89822843	Agap1	3UTR	C2U	6	NA	0.5	+	0	10	0.5	12	C2U	10904_1	5	OLG
chr1	89822842	89822843	Agap1	3UTR	C2U	14	NA	0.5	+	0	10	0.5	28	C2U	162630_1	7	OLG
chr1	89822842	89822843	Agap1	3UTR	C2U	13	NA	0.65	+	0	10	0.65	20	C2U	804039_1	2	OLG
chr1	89822842	89822843	Agap1	3UTR	C2U	13	NA	0.6842	+	0	10	0.6842	19	C2U	827226_1	7	OLG
chr1	89822842	89822843	Agap1	3UTR	C2U	11	NA	0.7857	+	0	10	0.7857	14	C2U	535540_1	2	OLG
chr1	89822842	89822843	Agap1	3UTR	C2U	10	NA	1	+	0	10	1	10	C2U	66687_1	5	OLG
chr1	91487064	91487065	Asb1	3UTR	C2U	10	NA	1	+	0	10	1	10	C2U	788041_1	2	OLG
chr1	92564949	92564950	Cops9	3UTR	C2U	3	NA	0.2727	-	0	10	0.2727	11	C2U	397424_1	6	OLG
chr1	92564949	92564950	Cops9	3UTR	C2U	10	NA	0.8333	-	0	10	0.8333	12	C2U	465641_1	6	OLG
chr1	92564973	92564974	Cops9	3UTR	C2U	5	NA	0.3571	-	0	10	0.3571	14	C2U	417299_1	7	OLG
chr1	92565065	92565066	Cops9	3UTR	C2U	10	NA	0.5	-	0	10	0.5	20	C2U	684555_1	6	OLG
chr1	92943242	92943243	Kif1a	3UTR	C2U	4	NA	0.3636	-	0	10	0.3636	11	C2U	115744_1	3	OLG
chr1	92943242	92943243	Kif1a	3UTR	C2U	7	NA	0.5385	-	0	10	0.5385	13	C2U	182702_1	3	OLG
chr1	92943242	92943243	Kif1a	3UTR	C2U	7	NA	0.5385	-	0	10	0.5385	13	C2U	671699_1	3	OLG
chr1	92943267	92943268	Kif1a	3UTR	C2U	5	NA	0.4545	-	0	10	0.4545	11	C2U	460543_1	3	OLG
chr1	92943269	92943270	Kif1a	3UTR	C2U	4	NA	0.3077	-	0	10	0.3077	13	C2U	810965_1	7	OLG
chr1	92943269	92943270	Kif1a	3UTR	C2U	7	NA	0.3182	-	0	10	0.3182	22	C2U	683183_1	7	OLG
chr1	92943269	92943270	Kif1a	3UTR	C2U	6	NA	0.4	-	0	10	0.4	15	C2U	835000_1	7	OLG
chr1	92943269	92943270	Kif1a	3UTR	C2U	9	NA	0.6429	-	0	10	0.6429	14	C2U	732635_1	7	OLG
chr1	92943269	92943270	Kif1a	3UTR	C2U	8	NA	0.7273	-	0	10	0.7273	11	C2U	532087_1	6	OLG
chr1	92943269	92943270	Kif1a	3UTR	C2U	9	NA	0.75	-	0	10	0.75	12	C2U	586858_1	6	OLG
chr1	92943271	92943272	Kif1a	3UTR	C2U	3	NA	0.3	-	0	10	0.3	10	C2U	578177_1	5	OLG
chr1	92943271	92943272	Kif1a	3UTR	C2U	4	NA	0.4	-	0	10	0.4	10	C2U	95842_1	5	OLG
chr1	92943271	92943272	Kif1a	3UTR	C2U	7	NA	0.4667	-	0	10	0.4667	15	C2U	402664_1	7	OLG
chr1	92943271	92943272	Kif1a	3UTR	C2U	13	NA	0.5	-	0	10	0.5	26	C2U	317451_1	7	OLG
chr1	92943271	92943272	Kif1a	3UTR	C2U	5	NA	0.5	-	0	10	0.5	10	C2U	402686_1	5	OLG
chr1	92943271	92943272	Kif1a	3UTR	C2U	7	NA	0.5	-	0	10	0.5	14	C2U	462453_1	7	OLG
chr1	92943271	92943272	Kif1a	3UTR	C2U	7	NA	0.5833	-	0	10	0.5833	12	C2U	703351_1	5	OLG
chr1	92943271	92943272	Kif1a	3UTR	C2U	8	NA	0.6154	-	0	10	0.6154	13	C2U	403681_1	7	OLG
chr1	92943271	92943272	Kif1a	3UTR	C2U	9	NA	0.6923	-	0	10	0.6923	13	C2U	10660_1	2	OLG
chr1	92943271	92943272	Kif1a	3UTR	C2U	7	NA	0.7	-	0	10	0.7	10	C2U	367339_1	2	OLG
chr1	92943271	92943272	Kif1a	3UTR	C2U	8	NA	0.8	-	0	10	0.8	10	C2U	439800_1	2	OLG
chr1	92943271	92943272	Kif1a	3UTR	C2U	12	NA	0.8	-	0	10	0.8	15	C2U	799316_1	2	OLG
chr1	92943271	92943272	Kif1a	3UTR	C2U	10	NA	0.9091	-	0	10	0.9091	11	C2U	187756_1	2	OLG
chr1	92943282	92943283	Kif1a	3UTR	C2U	7	NA	0.5	-	0	10	0.5	14	C2U	570310_1	5	OLG
chr1	92943282	92943283	Kif1a	3UTR	C2U	9	NA	0.8182	-	0	10	0.8182	11	C2U	491707_1	5	OLG
chr1	92943289	92943290	Kif1a	3UTR	C2U	10	NA	0.2857	-	0	10	0.2857	35	C2U	454481_1	7	OLG
chr1	92943289	92943290	Kif1a	3UTR	C2U	8	NA	0.2963	-	0	10	0.2963	27	C2U	695238_1	7	OLG
chr1	92943305	92943306	Kif1a	3UTR	C2U	11	NA	0.6875	-	0	10	0.6875	16	C2U	6894_1	6	OLG
chr1	92943318	92943319	Kif1a	3UTR	C2U	5	NA	0.3333	-	0	10	0.3333	15	C2U	14110_1	6	OLG
chr1	92943318	92943319	Kif1a	3UTR	C2U	6	NA	0.4615	-	0	10	0.4615	13	C2U	127515_1	6	OLG
chr1	92943319	92943320	Kif1a	3UTR	C2U	6	NA	0.2727	-	0	10	0.2727	22	C2U	653000_1	3	OLG
chr1	92943319	92943320	Kif1a	3UTR	C2U	4	NA	0.2857	-	0	10	0.2857	14	C2U	835945_1	3	OLG
chr1	92943319	92943320	Kif1a	3UTR	C2U	5	NA	0.4545	-	0	10	0.4545	11	C2U	663548_1	3	OLG
chr1	92943319	92943320	Kif1a	3UTR	C2U	7	NA	0.5	-	0	10	0.5	14	C2U	217465_1	3	OLG
[truncated: 610,705+ more rows]
