# Supplementary material for: Single-cell discovery of m6A RNA modifications in the hippocampus
Source: Genome Res. 2024 Jun;34(6):822–36. doi: 10.1101/gr.278424.123 (PMC11293556; doi:10.1101/gr.278424.123)
Supplement: Supplement 23 [file Supplemental_Table_S13.xlsx]

## Sheet: Table S13
Pie chart showing m6A sites identified by scRNA-seq
Localization	variants	variant_percentage
3'UTR	709495	0.761275
5'UTR	9623	0.0103253
CDS	199567	0.214132
ncRNA	13297	0.0142674
