# Supplementary material for: Single-cell discovery of m6A RNA modifications in the hippocampus
Source: Genome Res. 2024 Jun;34(6):822–36. doi: 10.1101/gr.278424.123 (PMC11293556; doi:10.1101/gr.278424.123)
Supplement: Supplement 24 [file Supplemental_Table_S14.xlsx]

## Sheet: Table S14
m6A sites in single cells of one cell type with m/k=1 and that occur in other cell types with a lower m/k<0.9 ratio
OLG						IMC						NEUR						ASC						EC
chr	start	end	gene	n_cells		chr	start	end	gene	n_cells		chr	start	end	gene	n_cells		chr	start	end	gene	n_cells		chr	start	end	gene	n_cells
chr1	4846877	4846878	Mrpl15	1		chr1	4846823	4846824	Mrpl15	1		chr1	4968085	4968086	Tcea1	1		chr1	24804191	24804192	Lmbrd1	1		chr1	92567422	92567423	Cops9	1
chr1	4915500	4915501	Lypla1	1		chr1	4846919	4846920	Mrpl15	4		chr1	5232417	5232418	Atp6v1h	2		chr1	30980805	30980806	Ptp4a1	1		chr1	167947797	167947798	Pbx1	1
chr1	4956988	4956989	Tcea1	1		chr1	4916683	4916684	Lypla1	1		chr1	5232599	5232600	Atp6v1h	1		chr1	30984064	30984065	Ptp4a1	1		chr1	171962565	171962566	Pex19	1
chr1	5232423	5232424	Atp6v1h	3		chr1	4916738	4916739	Lypla1	1		chr1	16713455	16713456	Eloc	1		chr1	38060805	38060806	Eif5b	1		chr1	180054691	180054692	Psen2	2
chr1	5232485	5232486	Atp6v1h	2		chr1	4928154	4928155	Tcea1	1		chr1	24805085	24805086	Lmbrd1	1		chr1	55117346	55117347	Hspd1	1		chr1	184546010	184546011	Mtarc2	1
chr1	6319874	6319875	Rb1cc1	1		chr1	4937740	4937741	Tcea1	1		chr1	34346951	34346952	Dst	1		chr1	59139992	59139993	Tmem237	2		chr11	60449217	60449218	Alkbh5	3
chr1	6930945	6930946	St18	1		chr1	4956990	4956991	Tcea1	1		chr1	34347311	34347312	Dst	2		chr1	59909759	59909760	Bmpr2	1		chr11	69216376	69216377	Trappc1	1
chr1	7241381	7241382	Pcmtd1	1		chr1	5232423	5232424	Atp6v1h	9		chr1	36732394	36732395	Cox5b	2		chr1	60022978	60022979	Fam117b	2		chr11	98794482	98794483	Wipf2	1
chr1	9791254	9791255	Vcpip1	1		chr1	5232485	5232486	Atp6v1h	1		chr1	38058567	38058568	Eif5b	1		chr1	60519548	60519549	Abi2	1		chr11	101179321	101179322	Becn1	8
chr1	9793583	9793584	Vcpip1	1		chr1	7231247	7231248	Pcmtd1	2		chr1	39407282	39407283	Rpl31	21		chr1	65315084	65315085	Pikfyve	1		chr12	8548343	8548344	Rhob	35
chr1	9794884	9794885	Vcpip1	1		chr1	9617429	9617430	Rrs1	2		chr1	39409120	39409121	Rpl31	16		chr1	78684448	78684449	Acsl3	2		chr12	69388182	69388183	Nemf	2
chr1	9969029	9969030	Sgk3	1		chr1	9793517	9793518	Vcpip1	1		chr1	39409190	39409191	Rpl31	12		chr1	80243596	80243597	Cul3	2		chr13	9735001	9735002	Zmynd11	4
chr1	9969033	9969034	Sgk3	2		chr1	9815739	9815740	Vcpip1	1		chr1	39410741	39410742	Rpl31	1		chr1	86285006	86285007	Ncl	2		chr13	96617481	96617482	Polk	1
chr1	10012926	10012927	Snhg6	3		chr1	9969029	9969030	Sgk3	1		chr1	43789171	43789172	Uxs1	1		chr1	93435721	93435722	Septin2	4		chr13	102869239	102869240	Mast4	7
chr1	10208064	10208065	Arfgef1	1		chr1	9969142	9969143	Sgk3	1		chr1	53384007	53384008	Asnsd1	1		chr1	97748902	97748903	Pam	1		chr15	43128913	43128914	Eif3e	1
chr1	10208165	10208166	Arfgef1	1		chr1	9970496	9970497	Sgk3	1		chr1	55100537	55100538	Coq10b	1		chr1	97748955	97748956	Pam	1		chr16	13653028	13653029	Ntan1	4
chr1	10259751	10259752	Arfgef1	2		chr1	10012319	10012320	Snhg6	1		chr1	55117276	55117277	Hspd1	3		chr1	132394245	132394246	Dstyk	1		chr16	56010174	56010175	Senp7	3
chr1	13635248	13635249	Tram1	3		chr1	10014247	10014248	Snhg6	1		chr1	55735586	55735587	Plcl1	1		chr1	138412013	138412014	Nek7	3		chr17	35486016	35486017	H2-D1	177
chr1	13635308	13635309	Tram1	1		chr1	10208016	10208017	Arfgef1	1		chr1	58446279	58446280	Bzw1	2		chr1	150237183	150237184	Odr4	1		chr19	53361337	53361338	Mxi1	2
chr1	13646609	13646610	Tram1	1		chr1	10254208	10254209	Arfgef1	1		chr1	59139972	59139973	Tmem237	1		chr1	155928331	155928332	Tor1aip2	12		chr2	76213909	76213910	Rbm45	5
chr1	13648376	13648377	Tram1	1		chr1	13209631	13209632	Ncoa2	4		chr1	59140201	59140202	Tmem237	1		chr1	157247531	157247532	2810025M15Rik	2		chr2	130013843	130013844	Snrpb	2
chr1	13649724	13649725	Tram1	1		chr1	13636293	13636294	Tram1	1		chr1	59916607	59916608	Bmpr2	1		chr1	172198804	172198805	Kcnj10	5		chr3	122718232	122718233	1810037I17Rik	3
chr1	16172049	16172050	Rpl7	9		chr1	16172124	16172125	Rpl7	12		chr1	63635114	63635115	Adam23	1		chr1	172199595	172199596	Kcnj10	4		chr4	4762822	4762823	Bpnt2	10
chr1	16172111	16172112	Rpl7	20		chr1	16172140	16172141	Rpl7	2		chr1	66870059	66870060	Acadl	1		chr1	177278162	177278163	Zbtb18	1		chr4	19611712	19611713	Wwp1	3
chr1	16172124	16172125	Rpl7	44		chr1	16172782	16172783	Rpl7	1		chr1	71618344	71618345	Atic	1		chr1	182289809	182289810	Trp53bp2	1		chr4	137385739	137385740	Usp48	2
chr1	16172965	16172966	Rpl7	2		chr1	16640117	16640118	Ube2w	2		chr1	71618358	71618359	Atic	1		chr1	182295061	182295062	Capn2	9		chr5	77146073	77146074	Srp72	2
chr1	16173003	16173004	Rpl7	1		chr1	21007547	21007548	Paqr8	3		chr1	72341695	72341696	Tmem169	1		chr10	13007306	13007307	Plagl1	2		chr5	106784991	106784992	Zfp644	1
chr1	16201564	16201565	Rdh10	1		chr1	23409004	23409005	Ogfrl1	2		chr1	74303574	74303575	Arpc2	19		chr10	24063692	24063693	Stx7	1		chr6	39779248	39779249	Mrps33	5
chr1	16202478	16202479	Rdh10	1		chr1	23884881	23884882	Smap1	4		chr1	74605720	74605721	Zfp142	1		chr10	53783230	53783231	Man1a	1		chr6	39779333	39779334	Mrps33	1
chr1	16640081	16640082	Ube2w	1		chr1	24801728	24801729	Lmbrd1	2		chr1	84014159	84014160	Pid1	1		chr10	57687819	57687820	Smpdl3a	1		chr7	35338275	35338276	Ankrd27	1
chr1	16640141	16640142	Ube2w	1		chr1	24801732	24801733	Lmbrd1	1		chr1	84014199	84014200	Pid1	2		chr10	67381679	67381680	Ado	1		chr7	87939954	87939955	Ctsc	1
chr1	16640576	16640577	Ube2w	1		chr1	24801821	24801822	Lmbrd1	1		chr1	84347669	84347670	Dner	2		chr10	67383443	67383444	Ado	1		chr7	110670265	110670266	Eif4g2	1
chr1	16713148	16713149	Eloc	1		chr1	24801829	24801830	Lmbrd1	6		chr1	85777603	85777604	Cab39	2		chr10	67383486	67383487	Ado	2		chrX	52644646	52644647	Rtl8a	34
chr1	16713523	16713524	Eloc	2		chr1	24801837	24801838	Lmbrd1	3		chr1	85778267	85778268	Cab39	1		chr10	81232239	81232240	Nfic	6		chrX	74829423	74829424	Pls3	1
chr1	16713570	16713571	Eloc	1		chr1	24801873	24801874	Lmbrd1	9		chr1	85778359	85778360	Cab39	1		chr10	81234936	81234937	Nfic	11
chr1	16713589	16713590	Eloc	1		chr1	24805080	24805081	Lmbrd1	5		chr1	86471043	86471044	Pde6d	2		chr10	88311123	88311124	Chpt1	2
chr1	16713613	16713614	Eloc	1		chr1	24805199	24805200	Lmbrd1	2		chr1	86594223	86594224	Nppc	2		chr10	98859503	98859504	Atp2b1	4
chr1	16716027	16716028	Eloc	2		chr1	30980772	30980773	Ptp4a1	6		chr1	89822898	89822899	Agap1	6		chr10	109518790	109518791	Nav3	1
chr1	23884825	23884826	Smap1	1		chr1	30981598	30981599	Ptp4a1	1		chr1	91487098	91487099	Asb1	1		chr10	127334970	127334971	R3hdm2	1
chr1	24050292	24050293	Fam135a	1		chr1	30981753	30981754	Ptp4a1	1		chr1	91487200	91487201	Asb1	1		chr10	127335095	127335096	R3hdm2	3
chr1	24801847	24801848	Lmbrd1	1		chr1	30981772	30981773	Ptp4a1	4		chr1	93333993	93333994	Hdlbp	1		chr10	127912753	127912754	Ptges3	1
chr1	24801889	24801890	Lmbrd1	1		chr1	30983069	30983070	Ptp4a1	1		chr1	93436206	93436207	Septin2	1		chr10	127912867	127912868	Ptges3	1
chr1	24801905	24801906	Lmbrd1	1		chr1	34225115	34225116	Dst	3		chr1	93633307	93633308	Thap4	2		chr11	5010681	5010682	Gas2l1	1
chr1	24805080	24805081	Lmbrd1	1		chr1	34253665	34253666	Dst	1		chr1	106651762	106651763	Kdsr	1		chr11	5010682	5010683	Gas2l1	2
chr1	24805286	24805287	Lmbrd1	1		chr1	34265047	34265048	Dst	1		chr1	118226422	118226423	Tsn	1		chr11	17150034	17150035	Ppp3r1	3
chr1	30980855	30980856	Ptp4a1	1		chr1	34266943	34266944	Dst	3		chr1	118536887	118536888	Clasp1	1		chr11	20635907	20635908	Aftph	7
chr1	30983069	30983070	Ptp4a1	2		chr1	34346642	34346643	Dst	1		chr1	125320837	125320838	Actr3	28		chr11	30881787	30881788	Erlec1	2
chr1	34206476	34206477	Dst	1		chr1	34346697	34346698	Dst	6		chr1	125320851	125320852	Actr3	18		chr11	30884720	30884721	Erlec1	1
chr1	34266925	34266926	Dst	2		chr1	34347390	34347391	Dst	1		chr1	125320933	125320934	Actr3	3		chr11	40639766	40639767	Ccng1	1
chr1	34266935	34266936	Dst	1		chr1	34852457	34852458	Fam168b	1		chr1	127418716	127418717	Tmem163	1		chr11	40639772	40639773	Ccng1	2
chr1	34346868	34346869	Dst	1		chr1	34852469	34852470	Fam168b	1		chr1	127418861	127418862	Tmem163	1		chr11	46332143	46332144	Med7	1
chr1	34346984	34346985	Dst	1		chr1	34852485	34852486	Fam168b	2		chr1	128516488	128516489	Cxcr4	1		chr11	48876344	48876345	Tgtp1	4
chr1	34347308	34347309	Dst	1		chr1	34856376	34856377	Fam168b	1		chr1	131860547	131860548	Nucks1	1		chr11	49769209	49769210	Mapk9	1
chr1	34347389	34347390	Dst	2		chr1	34918359	34918360	Plekhb2	3		chr1	132440082	132440083	Cntn2	5		chr11	50198399	50198400	Canx	1
chr1	34347390	34347391	Dst	2		chr1	34918392	34918393	Plekhb2	3		chr1	133537956	133537957	Snrpe	3		chr11	51576294	51576295	0610009B22Rik	2
chr1	34852457	34852458	Fam168b	1		chr1	34918627	34918628	Plekhb2	3		chr1	133566882	133566883	Zc3h11a	2		chr11	51682310	51682311	Sar1b	3
chr1	34852507	34852508	Fam168b	2		chr1	36145344	36145345	Hs6st1	4		chr1	134003252	134003253	Btg2	2		chr11	52280069	52280070	Vdac1	1
chr1	34856388	34856389	Fam168b	1		chr1	36462544	36462545	Lman2l	1		chr1	134360023	134360024	Adipor1	1		chr11	53319862	53319863	Uqcrq	3
chr1	34918359	34918360	Plekhb2	1		chr1	36831566	36831567	Tmem131	1		chr1	135083760	135083761	Arl8a	2		chr11	53434877	53434878	Septin8	2
chr1	36182827	36182828	Uggt1	2		chr1	37479514	37479515	Mgat4a	1		chr1	135229557	135229558	Timm17a	1		chr11	55390777	55390778	G3bp1	1
chr1	36375079	36375080	Kansl3	1		chr1	37918199	37918200	Mitd1	2		chr1	136197374	136197375	Camsap2	1		chr11	59682827	59682828	Flcn	12
chr1	36577505	36577506	Ankrd39	1		chr1	38026474	38026475	Txndc9	1		chr1	143482010	143482011	Cdc73	1		chr11	69885603	69885604	Gabarap	95
chr1	36732315	36732316	Cox5b	1		chr1	38026706	38026707	Txndc9	1		chr1	150237281	150237282	Odr4	1		chr11	72102628	72102629	Med31	1
chr1	36732394	36732395	Cox5b	1		chr1	38026730	38026731	Txndc9	6		chr1	150237283	150237284	Odr4	1		chr11	73066539	73066540	Emc6	2
chr1	36738506	36738507	Actr1b	2		chr1	38026745	38026746	Txndc9	3		chr1	150238546	150238547	Odr4	1		chr11	73067126	73067127	Emc6	4
chr1	37449648	37449649	Inpp4a	1		chr1	38058093	38058094	Eif5b	1		chr1	150324961	150324962	Tpr	3		chr11	75656139	75656140	Ywhae	118
chr1	37456264	37456265	Coa5	1		chr1	38090708	38090709	Eif5b	1		chr1	155720873	155720874	Cep350	1		chr11	75656346	75656347	Ywhae	45
chr1	37456268	37456269	Coa5	1		chr1	38091045	38091046	Eif5b	1		chr1	160030779	160030780	Cacybp	12		chr11	76112551	76112552	Glod4	3
chr1	37456274	37456275	Coa5	1		chr1	38091915	38091916	Rev1	1		chr1	160036054	160036055	Cacybp	2		chr11	76112557	76112558	Glod4	5
chr1	37477812	37477813	Unc50	1		chr1	38092075	38092076	Rev1	1		chr1	160795511	160795512	Rc3h1	2		chr11	76672301	76672302	Cpd	1
chr1	37477917	37477918	Unc50	2		chr1	38146761	38146762	Rev1	1		chr1	160795526	160795527	Rc3h1	1		chr11	76672315	76672316	Cpd	1
chr1	37918202	37918203	Mitd1	2		chr1	39407279	39407280	Rpl31	2		chr1	162499914	162499915	Prrc2c	1		chr11	76672350	76672351	Cpd	3
chr1	38026475	38026476	Txndc9	1		chr1	39407282	39407283	Rpl31	2		chr1	162532919	162532920	Prrc2c	1		chr11	76672352	76672353	Cpd	2
chr1	38026730	38026731	Txndc9	3		chr1	39407316	39407317	Rpl31	6		chr1	163744421	163744422	Kifap3	2		chr11	77428636	77428637	Taok1	1
chr1	38060678	38060679	Eif5b	1		chr1	39407318	39407319	Rpl31	9		chr1	163744457	163744458	Kifap3	2		chr11	77428640	77428641	Taok1	3
chr1	38071387	38071388	Eif5b	1		chr1	39409188	39409189	Rpl31	2		chr1	165002189	165002190	Sft2d2	1		chr11	86586160	86586161	Cltc	9
chr1	38090860	38090861	Eif5b	1		chr1	40064750	40064751	Map4k4	2		chr1	170021327	170021328	Uhmk1	4		chr11	87506847	87506848	Mtmr4	1
chr1	38092038	38092039	Rev1	1		chr1	40065226	40065227	Map4k4	1		chr1	170536593	170536594	Atf6	2		chr11	88230523	88230524	Msi2	7
chr1	39035503	39035504	Pdcl3	1		chr1	43789155	43789156	Uxs1	1		chr1	170788367	170788368	Fcgr2b	20		chr11	88233691	88233692	Msi2	1
chr1	39407282	39407283	Rpl31	21		chr1	44041317	44041318	Tpp2	1		chr1	171893904	171893905	Ncstn	10		chr11	88234874	88234875	Msi2	12
chr1	39407316	39407317	Rpl31	54		chr1	44183514	44183515	Bivm	1		chr1	172025179	172025180	Pea15a	7		chr11	94232530	94232531	Ankrd40	3
chr1	39407318	39407319	Rpl31	62		chr1	51224570	51224571	Tmeff2	2		chr1	172026028	172026029	Pea15a	1		chr11	95282465	95282466	Slc35b1	2
chr1	39409120	39409121	Rpl31	12		chr1	52171703	52171704	Stat1	5		chr1	176561469	176561470	Cep170	3		chr11	95383222	95383223	Spop	1
chr1	39409190	39409191	Rpl31	14		chr1	52171720	52171721	Stat1	1		chr1	178161563	178161564	Hnrnpu	4		chr11	95383224	95383225	Spop	3
chr1	40064035	40064036	Map4k4	1		chr1	52178497	52178498	Stat1	1		chr1	179514274	179514275	Sccpdh	1		chr11	97576028	97576029	Mllt6	4
chr1	42738722	42738723	Pou3f3	1		chr1	52193060	52193061	Stat1	1		chr1	179922026	179922027	Cdc42bpa	2		chr11	101169002	101169003	Coa3	1
chr1	42738974	42738975	Pou3f3	1		chr1	52193134	52193135	Stat1	2		chr1	179990027	179990028	Cdc42bpa	2		chr11	101169007	101169008	Coa3	1
chr1	42739102	42739103	Pou3f3	1		chr1	52193135	52193136	Stat1	2		chr1	180054671	180054672	Psen2	1		chr11	101472707	101472708	Nbr1	21
chr1	43789432	43789433	Uxs1	1		chr1	52198963	52198964	Stat1	9		chr1	180996357	180996358	Cnih4	1		chr11	102366927	102366928	Gpatch8	3
chr1	44022334	44022335	Tpp2	1		chr1	52199100	52199101	Stat1	1		chr1	180996470	180996471	Cnih4	1		chr11	103008917	103008918	Hexim1	2
chr1	44041332	44041333	Tpp2	1		chr1	52199882	52199883	Stat1	24		chr1	181004867	181004868	Wdr26	4		chr11	106393567	106393568	Tex2	1
chr1	44183512	44183513	Bivm	2		chr1	52199883	52199884	Stat1	13		chr1	181959738	181959739	Srp9	1		chr11	115914106	115914107	H3f3b	55
chr1	51224682	51224683	Tmeff2	2		chr1	52199887	52199888	Stat1	9		chr1	182103996	182103997	Degs1	1		chr11	121507960	121507961	Tbcd	1
chr1	52171703	52171704	Stat1	1		chr1	52230390	52230391	Gls	1		chr1	182104095	182104096	Degs1	1		chr12	3556596	3556597	Asxl2	1
chr1	52174785	52174786	Stat1	2		chr1	53349072	53349073	Ormdl1	1		chr1	182143712	182143713	Fbxo28	1		chr12	11329676	11329677	Smc6	1
chr1	52193047	52193048	Stat1	1		chr1	54684842	54684843	Ankrd44	1		chr1	182295050	182295051	Capn2	2		chr12	17036395	17036396	Rock2	2
chr1	52198821	52198822	Stat1	1		chr1	55026356	55026357	Sf3b1	1		chr1	183104399	183104400	Aida	4		chr12	26357197	26357198	Rnf144a	1
chr1	52199356	52199357	Stat1	1		chr1	55026457	55026458	Sf3b1	2		chr1	191087008	191087009	Ppp2r5a	4		chr12	52563351	52563352	Arhgap5	1
chr1	52199882	52199883	Stat1	10		chr1	55026504	55026505	Sf3b1	1		chr1	191510555	191510556	Lpgat1	8		chr12	52563358	52563359	Arhgap5	1
chr1	52199883	52199884	Stat1	6		chr1	55034537	55034538	Sf3b1	1		chr1	191510659	191510660	Lpgat1	1		chr12	65039376	65039377	Togaram1	2
chr1	52199887	52199888	Stat1	1		chr1	55040635	55040636	Sf3b1	1		chr1	191510690	191510691	Lpgat1	4		chr12	72148141	72148142	Jkamp	1
chr1	52497285	52497286	Nab1	1		chr1	55066536	55066537	Sf3b1	1		chr1	194498900	194498901	Plxna2	1		chr12	76366439	76366440	Mthfd1	2
chr1	52498422	52498423	Nab1	1		chr1	55117412	55117413	Hspd1	1		chr10	8598306	8598307	Sash1	7		chr12	80155518	80155519	Zfp36l1	2
chr1	52695623	52695624	Mfsd6	1		chr1	55120250	55120251	Hspd1	4		chr10	12601996	12601997	Utrn	1		chr12	81405878	81405879	Gm20498	2
chr1	52695638	52695639	Mfsd6	1		chr1	55120263	55120264	Hspd1	3		chr10	13005511	13005512	Plagl1	1		chr12	81711519	81711520	Ttc9	1
chr1	52697285	52697286	Mfsd6	1		chr1	55120300	55120301	Hspd1	2		chr10	13007132	13007133	Plagl1	1		chr12	84064278	84064279	Acot1	10
chr1	53383975	53383976	Asnsd1	2		chr1	55123746	55123747	Hspd1	7		chr10	13007308	13007309	Plagl1	1		chr12	85346491	85346492	Nek9	8
chr1	53383980	53383981	Asnsd1	3		chr1	55128285	55128286	Hspe1	2		chr10	14531329	14531330	Vta1	2		chr12	87497023	87497024	Snw1	4
chr1	53384007	53384008	Asnsd1	1		chr1	55128286	55128287	Hspe1	4		chr10	17601103	17601104	Cited2	3		chr12	101005963	101005964	Ppp4r3a	3
chr1	53384096	53384097	Asnsd1	2		chr1	55129921	55129922	Hspe1	2		chr10	18000685	18000686	Reps1	1		chr12	104729873	104729874	Clmn	2
chr1	54512479	54512480	Pgap1	1		chr1	55130258	55130259	Hspe1	2		chr10	20199100	20199101	Bclaf1	1		chr12	110658855	110658856	Hsp90aa1	2
chr1	54684842	54684843	Ankrd44	4		chr1	55482991	55482992	Gm6644	1		chr10	25319683	25319684	Epb41l2	2		chr12	116023970	116023971	Zfp386	2
chr1	55026297	55026298	Sf3b1	4		chr1	55483021	55483022	Gm6644	2		chr10	29026243	29026244	Soga3	3		chr13	34257862	34257863	Bphl	1
chr1	55042641	55042642	Sf3b1	1		chr1	55741249	55741250	Plcl1	1		chr10	29075399	29075400	Soga3	1		chr13	34363759	34363760	Slc22a23	1
chr1	55111636	55111637	Coq10b	2		chr1	55792919	55792920	Plcl1	8		chr10	29075401	29075402	Soga3	17		chr13	38162345	38162346	Ssr1	7
chr1	55117269	55117270	Hspd1	1		chr1	57424259	57424260	1700066M21Rik	1		chr10	30678852	30678853	Ncoa7	1		chr13	38684301	38684302	Txndc5	1
chr1	55117276	55117277	Hspd1	1		chr1	57427633	57427634	Tyw5	1		chr10	34159938	34159939	Tspyl1	1		chr13	47251733	47251734	Dek	2
chr1	55120292	55120293	Hspd1	3		chr1	57452531	57452532	Maip1	1		chr10	34177119	34177120	Tspyl4	3		chr13	48417854	48417855	Id4	1
chr1	55120878	55120879	Hspd1	2		chr1	57454884	57454885	Maip1	1		chr10	34177225	34177226	Tspyl4	12		chr13	48732911	48732912	Ptpdc1	11
chr1	55123746	55123747	Hspd1	5		chr1	58445145	58445146	Bzw1	3		chr10	37011740	37011741	Marcks	1		chr13	49034332	49034333	Fam120a	5
chr1	55123804	55123805	Hspd1	1		chr1	58445649	58445650	Bzw1	2		chr10	40166400	40166401	Amd1	1		chr13	55851097	55851098	B230219D22Rik	6
chr1	55126946	55126947	Hspd1	1		chr1	58446242	58446243	Bzw1	1		chr10	52315014	52315015	Nus1	1		chr13	58325293	58325294	Ubqln1	1
chr1	55128285	55128286	Hspe1	20		chr1	58446279	58446280	Bzw1	2		chr10	53783463	53783464	Man1a	2		chr13	59597585	59597586	Agtpbp1	2
chr1	55210138	55210139	Rftn2	1		chr1	58446348	58446349	Bzw1	1		chr10	57392193	57392194	Serinc1	1		chr13	75998085	75998086	Glrx	2
chr1	55483021	55483022	Gm6644	2		chr1	58446373	58446374	Bzw1	3		chr10	57392734	57392735	Serinc1	3		chr13	94339781	94339782	Scamp1	1
chr1	55790877	55790878	Plcl1	1		chr1	58451372	58451373	Clk1	1		chr10	57392763	57392764	Serinc1	1		chr13	94339835	94339836	Scamp1	1
chr1	55792919	55792920	Plcl1	1		chr1	58451375	58451376	Clk1	4		chr10	57392855	57392856	Serinc1	4		chr13	94702498	94702499	Ap3b1	5
chr1	57452447	57452448	Maip1	1		chr1	58451376	58451377	Clk1	8		chr10	60138141	60138142	Psap	122		chr13	98860544	98860545	Fcho2	1
chr1	57452526	57452527	Maip1	1		chr1	58451421	58451422	Clk1	2		chr10	60138203	60138204	Psap	124		chr13	101825499	101825500	Pik3r1	9
chr1	57452536	57452537	Maip1	1		chr1	58456295	58456296	Clk1	1		chr10	60138319	60138320	Psap	61		chr13	107098576	107098577	Kif2a	1
chr1	57454863	57454864	Maip1	1		chr1	58532873	58532874	Orc2	1		chr10	60598546	60598547	Unc5b	1		chr13	111883220	111883221	Map3k1	2
chr1	58440571	58440572	Bzw1	1		chr1	58630347	58630348	Ndufb3	2		chr10	61528842	61528843	Sar1a	2		chr13	111883239	111883240	Map3k1	1
chr1	58445124	58445125	Bzw1	2		chr1	58634937	58634938	Ndufb3	2		chr10	62451996	62451997	Ddx50	2		chr13	119472280	119472281	Nnt	2
chr1	58445145	58445146	Bzw1	1		chr1	58796426	58796427	Cflar	1		chr10	62851419	62851420	Hnrnph3	1		chr13	119602777	119602778	4833420G17Rik	1
chr1	58445456	58445457	Bzw1	1		chr1	59139992	59139993	Tmem237	3		chr10	62851590	62851591	Rufy2	1		chr14	20370454	20370455	Ecd	1
chr1	58446368	58446369	Bzw1	1		chr1	59224691	59224692	Als2	1		chr10	69859863	69859864	Ank3	17		chr14	20754246	20754247	Chchd1	1
chr1	58446460	58446461	Bzw1	1		chr1	59750432	59750433	Nop58	1		chr10	69860054	69860055	Ank3	4		chr14	34066660	34066661	Glud1	4
chr1	58451372	58451373	Clk1	6		chr1	59909759	59909760	Bmpr2	1		chr10	69860114	69860115	Ank3	12		chr14	34133290	34133291	Bmpr1a	10
chr1	58451375	58451376	Clk1	4		chr1	59910887	59910888	Bmpr2	1		chr10	69860370	69860371	Ank3	33		chr14	34133298	34133299	Bmpr1a	5
chr1	58451376	58451377	Clk1	6		chr1	59913339	59913340	Bmpr2	1		chr10	69860411	69860412	Ank3	18		chr14	36843017	36843018	Ghitm	56
chr1	58562244	58562245	Fam126b	2		chr1	60022978	60022979	Fam117b	1		chr10	69861130	69861131	Ank3	8		chr14	49324718	49324719	Ap5m1	1
chr1	58630347	58630348	Ndufb3	1		chr1	60022991	60022992	Fam117b	3		chr10	69862802	69862803	Ank3	1		chr14	52398045	52398046	Supt16	1
chr1	58634917	58634918	Ndufb3	3		chr1	60518395	60518396	Abi2	1		chr10	71063941	71063942	Tfam	1		chr14	54821402	54821403	4931414P19Rik	1
chr1	58635010	58635011	Ndufb3	1		chr1	63091740	63091741	Ino80d	1		chr10	71095600	71095601	Ube2d1	4		chr14	55846790	55846791	Irf9	3
chr1	58797961	58797962	Cflar	3		chr1	63218504	63218505	Eef1b2	13		chr10	75353910	75353911	Snrpd3	2		chr14	56897142	56897143	Parp4	2
chr1	58797965	58797966	Cflar	5		chr1	63218715	63218716	Eef1b2	3		chr10	76099819	76099820	Dip2a	1		chr14	73599910	73599911	Itm2b	140
chr1	58797968	58797969	Cflar	2		chr1	63635117	63635118	Adam23	2		chr10	78022837	78022838	Trappc10	2		chr14	74987124	74987125	Esd	2
chr1	59139952	59139953	Tmem237	2		chr1	64640752	64640753	Creb1	1		chr10	78263426	78263427	Cstb	2		chr14	105352170	105352171	Rbm26	1
chr1	59140021	59140022	Tmem237	1		chr1	64641888	64641889	Creb1	1		chr10	80129645	80129646	Rps15	2		chr14	119218819	119218820	Dnajc3	2
chr1	59202276	59202277	Als2	1		chr1	64828478	64828479	Plekhm3	3		chr10	81018039	81018040	Eef2	2		chr15	4184663	4184664	Oxct1	5
chr1	59678854	59678855	Sumo1	2		chr1	64828492	64828493	Plekhm3	1		chr10	83426979	83426980	Washc4	1		chr15	4184674	4184675	Oxct1	3
chr1	59678979	59678980	Sumo1	2		chr1	64828531	64828532	Plekhm3	2		chr10	84363207	84363208	Ckap4	2		chr15	9108651	9108652	Nadk2	1
chr1	59679108	59679109	Sumo1	1		chr1	65197984	65197985	Idh1	3		chr10	86526855	86526856	Hsp90b1	140		chr15	12350183	12350184	Golph3	1
chr1	59910745	59910746	Bmpr2	1		chr1	66757864	66757865	Rpe	1		chr10	86527551	86527552	Hsp90b1	5		chr15	12351075	12351076	Golph3	1
chr1	59916484	59916485	Bmpr2	1		chr1	66884412	66884413	Acadl	2		chr10	86531386	86531387	Hsp90b1	33		chr15	34284223	34284224	Laptm4b	13
chr1	59916543	59916544	Bmpr2	2		chr1	69573956	69573957	Ikzf2	1		chr10	88785294	88785295	Ano4	3		chr15	36775687	36775688	Ywhaz	1
chr1	59916572	59916573	Bmpr2	1		chr1	71618356	71618357	Atic	2		chr10	89548051	89548052	Actr6	1		chr15	57916536	57916537	Zhx1	3
chr1	59916607	59916608	Bmpr2	1		chr1	72672011	72672012	Smarcal1	1		chr10	90807120	90807121	Anks1b	3		chr15	65744187	65744188	Efr3a	1
chr1	60022969	60022970	Fam117b	1		chr1	74303524	74303525	Arpc2	1		chr10	90952734	90952735	Slc25a3	5		chr15	78914597	78914598	H1f0	2
chr1	60024228	60024229	Fam117b	1		chr1	74303526	74303527	Arpc2	2		chr10	90952874	90952875	Slc25a3	7		chr15	90114558	90114559	Alg10b	1
chr1	60024242	60024243	Fam117b	2		chr1	74307208	74307209	Arpc2	1		chr10	103254997	103254998	Slc6a15	2		chr15	94476996	94476997	Twf1	3
chr1	60024260	60024261	Fam117b	1		chr1	74307210	74307211	Arpc2	3		chr10	108114256	108114257	Ppp1r12a	1		chr15	98848007	98848008	Tuba1a	16
chr1	60024368	60024369	Fam117b	2		chr1	74307214	74307215	Arpc2	2		chr10	111328722	111328723	Nap1l1	4		chr15	102341589	102341590	Sp1	1
chr1	60426959	60426960	Cyp20a1	1		chr1	74307279	74307280	Arpc2	1		chr10	111332728	111332729	Nap1l1	3		chr16	4692753	4692754	Ubald1	3
chr1	63182961	63182962	Ndufs1	1		chr1	74319149	74319150	Aamp	1		chr10	112761665	112761666	Atxn7l3b	25		chr16	8439235	8439236	Abat	6
chr1	63182986	63182987	Ndufs1	1		chr1	74319151	74319152	Aamp	19		chr10	112762380	112762381	Atxn7l3b	6		chr16	8439248	8439249	Abat	1
chr1	63216986	63216987	Eef1b2	8		chr1	74319197	74319198	Aamp	7		chr10	112762451	112762452	Atxn7l3b	2		chr16	8439351	8439352	Abat	1
chr1	64640766	64640767	Creb1	1		chr1	74319201	74319202	Aamp	3		chr10	115126180	115126181	Rab21	1		chr16	13764904	13764905	Mpv17l	1
chr1	64828492	64828493	Plekhm3	1		chr1	74319267	74319268	Aamp	1		chr10	116887001	116887002	Cct2	3		chr16	22690964	22690965	Dnajb11	1
chr1	66758356	66758357	Rpe	1		chr1	74435894	74435895	Ctdsp1	2		chr10	116887032	116887033	Cct2	6		chr16	34926796	34926797	Hacd2	11
chr1	66870059	66870060	Acadl	1		chr1	74435896	74435897	Ctdsp1	1		chr10	116887159	116887160	Cct2	64		chr16	34926897	34926898	Hacd2	1
chr1	66870161	66870162	Acadl	1		chr1	74474830	74474831	Usp37	1		chr10	117051175	117051176	Yeats4	1		chr16	37910473	37910474	Gsk3b	1
chr1	66876158	66876159	Acadl	1		chr1	78401967	78401968	Farsb	2		chr10	117051244	117051245	Yeats4	1		chr16	38061214	38061215	Gsk3b	1
chr1	66884412	66884413	Acadl	2		chr1	79680293	79680294	Wdfy1	1		chr10	117051358	117051359	Yeats4	1		chr16	38345647	38345648	Poglut1	1
chr1	66884414	66884415	Acadl	1		chr1	80243647	80243648	Cul3	2		chr10	117519455	117519456	Cpm	1		chr16	38345930	38345931	Poglut1	13
chr1	67039888	67039889	Lancl1	1		chr1	80244762	80244763	Cul3	13		chr10	117519517	117519518	Cpm	2		chr16	43439255	43439256	Zbtb20	3
chr1	71618321	71618322	Atic	1		chr1	80244781	80244782	Cul3	5		chr10	117525049	117525050	Mdm2	3		chr16	55720488	55720489	Cep97	1
chr1	71618344	71618345	Atic	1		chr1	80244835	80244836	Cul3	2		chr10	119038717	119038718	Cand1	3		chr16	55793900	55793901	Zbtb11os1	1
chr1	72672006	72672007	Smarcal1	1		chr1	80479114	80479115	Dock10	18		chr10	121232981	121232982	Gns	2		chr16	76913414	76913415	Usp25	3
chr1	72897429	72897430	Igfbp5	1		chr1	80479128	80479129	Dock10	3		chr10	126903378	126903379	Tspan31	2		chr16	90516322	90516323	Mis18a	2
chr1	74302980	74302981	Arpc2	16		chr1	80479129	80479130	Dock10	1		chr10	127117749	127117750	Dctn2	3		chr16	93407154	93407155	Cbr1	1
chr1	74303524	74303525	Arpc2	9		chr1	80545067	80545068	Dock10	1		chr10	127335016	127335017	R3hdm2	3		chr16	95922935	95922936	Hmgn1	4
chr1	74307208	74307209	Arpc2	20		chr1	82422781	82422782	Rhbdd1	1		chr10	127335026	127335027	R3hdm2	1		chr17	8516165	8516166	Mpc1	5
chr1	74307247	74307248	Arpc2	11		chr1	82729880	82729881	Mff	2		chr10	127335085	127335086	R3hdm2	1		chr17	28070687	28070688	Snrpc	3
chr1	74319151	74319152	Aamp	4		chr1	82853892	82853893	Agfg1	1		chr10	127335135	127335136	R3hdm2	3		chr17	34240190	34240191	Ring1	1
chr1	74319197	74319198	Aamp	1		chr1	84717348	84717349	Trip12	1		chr10	127374306	127374307	Lrp1	1		chr17	36201960	36201961	Dhx16	1
chr1	74319201	74319202	Aamp	4		chr1	84717351	84717352	Trip12	1		chr10	127912309	127912310	Ptges3	3		chr17	36349528	36349529	H2-T22	1
chr1	74327664	74327665	Tmbim1	2		chr1	84717352	84717353	Trip12	2		chr10	127912315	127912316	Ptges3	2		chr17	45702911	45702912	Cdc5l	2
chr1	74392772	74392773	Pnkd	1		chr1	84729665	84729666	Trip12	1		chr10	128088524	128088525	Timeless	1		chr17	45721764	45721765	Cdc5l	2
chr1	74476998	74476999	Usp37	1		chr1	85777638	85777639	Cab39	1		chr10	128162028	128162029	Cnpy2	3		chr17	46482427	46482428	Polh	1
chr1	75112541	75112542	Cnppd1	1		chr1	85836113	85836114	Itm2c	1		chr10	128324981	128324982	Smarcc2	3		chr17	47239289	47239290	Ubr2	6
chr1	75217623	75217624	Dnajb2	1		chr1	85836186	85836187	Itm2c	2		chr10	128325055	128325056	Smarcc2	7		chr17	66293708	66293709	Ankrd12	2
chr1	75217626	75217627	Dnajb2	1		chr1	85836190	85836191	Itm2c	8		chr10	128325096	128325097	Smarcc2	5		chr17	66801638	66801639	Rab12	8
chr1	80243647	80243648	Cul3	1		chr1	85836193	85836194	Itm2c	6		chr10	128325106	128325107	Smarcc2	2		chr17	66801690	66801691	Rab12	1
chr1	80244655	80244656	Cul3	3		chr1	85836195	85836196	Itm2c	5		chr10	128748112	128748113	Cd63	267		chr17	71281267	71281268	Myl12b	1
chr1	80244731	80244732	Cul3	2		chr1	86055887	86055888	Psmd1	1		chr10	128748115	128748116	Cd63	210		chr17	87307244	87307245	Rhoq	2
chr1	80244762	80244763	Cul3	3		chr1	86055939	86055940	Psmd1	1		chr11	3200198	3200199	Drg1	2		chr18	7928453	7928454	Wac	1
chr1	80244790	80244791	Cul3	1		chr1	86055960	86055961	Psmd1	1		chr11	3594112	3594113	Tug1	5		chr18	9314619	9314620	Ccny	1
chr1	80244799	80244800	Cul3	1		chr1	86055965	86055966	Psmd1	2		chr11	3597068	3597069	Tug1	1		chr18	23792144	23792145	Dtna	1
chr1	80244835	80244836	Cul3	1		chr1	86280908	86280909	Ncl	8		chr11	5141745	5141746	Kremen1	5		chr18	23792196	23792197	Dtna	1
chr1	80479019	80479020	Dock10	1		chr1	86280912	86280913	Ncl	3		chr11	5475633	5475634	Xbp1	1		chr18	34478902	34478903	Reep5	1
chr1	80479123	80479124	Dock10	1		chr1	86283803	86283804	Ncl	1		chr11	5475634	5475635	Xbp1	5		chr18	36421356	36421357	Pura	16
chr1	80501496	80501497	Dock10	1		chr1	86284428	86284429	Ncl	2		chr11	5778141	5778142	Polm	1		chr18	36422707	36422708	Pura	1
chr1	80507862	80507863	Dock10	1		chr1	86285058	86285059	Ncl	1		chr11	6306373	6306374	Ogdh	12		chr18	36899809	36899810	Hars	2
chr1	80546246	80546247	Dock10	1		chr1	86454526	86454527	Ptma	1		chr11	6306536	6306537	Ogdh	1		chr18	36899884	36899885	Hars	4
chr1	80546565	80546566	Dock10	1		chr1	86454535	86454536	Ptma	2		chr11	6369715	6369716	Ppia	7		chr18	40338061	40338062	Yipf5	3
chr1	82211031	82211032	Irs1	1		chr1	86454580	86454581	Ptma	2		chr11	6417919	6417920	Purb	1		chr18	43664884	43664885	Jakmip2	2
chr1	82729729	82729730	Mff	1		chr1	86454625	86454626	Ptma	2		chr11	6420181	6420182	Purb	3		chr18	58079432	58079433	Slc12a2	4
chr1	82729751	82729752	Mff	1		chr1	86454626	86454627	Ptma	2		chr11	16454754	16454755	Sec61g	2		chr18	61721159	61721160	Csnk1a1	7
chr1	82873856	82873857	Agfg1	1		chr1	86454664	86454665	Ptma	20		chr11	16458108	16458109	Sec61g	73		chr18	73772317	73772318	Smad4	3
chr1	85504985	85504986	Sp110	1		chr1	86454665	86454666	Ptma	9		chr11	16458112	16458113	Sec61g	107		chr18	77869619	77869620	Atp5a1	5
chr1	85601462	85601463	Sp100	1		chr1	86458107	86458108	Ptma	32		chr11	20012462	20012463	Actr2	5		chr18	77870105	77870106	Atp5a1	2
chr1	85777505	85777506	Cab39	1		chr1	86458112	86458113	Ptma	92		chr11	20635874	20635875	Aftph	2		chr18	84030912	84030913	Tshz1	9
chr1	85777518	85777519	Cab39	1		chr1	86458221	86458222	Ptma	45		chr11	20635907	20635908	Aftph	5		chr18	84031017	84031018	Tshz1	7
chr1	85777603	85777604	Cab39	1		chr1	86458245	86458246	Ptma	129		chr11	21508485	21508486	Mdh1	1		chr19	5090852	5090853	B4gat1	6
chr1	85778907	85778908	Cab39	1		chr1	86458307	86458308	Ptma	32		chr11	22924731	22924732	Zrsr1	61		chr19	5543869	5543870	Cfl1	91
chr1	85779060	85779061	Cab39	1		chr1	86458389	86458390	Ptma	9		chr11	22952364	22952365	Cct4	2		chr19	7565593	7565594	Plaat3	1
chr1	85836116	85836117	Itm2c	1		chr1	86470826	86470827	Pde6d	5		chr11	22952868	22952869	Cct4	2		chr19	23142696	23142697	Klf9	19
chr1	85836190	85836191	Itm2c	23		chr1	86470984	86470985	Pde6d	1		chr11	29171775	29171776	Cfap36	2		chr19	23144816	23144817	Klf9	1
chr1	85836191	85836192	Itm2c	14		chr1	86471023	86471024	Pde6d	3		chr11	29172801	29172802	Cfap36	12		chr19	24453751	24453752	Fam122a	3
chr1	85836192	85836193	Itm2c	10		chr1	86471046	86471047	Pde6d	1		chr11	29413869	29413870	Ccdc88a	1		chr19	29000069	29000070	Ak3	11
chr1	86055939	86055940	Psmd1	1		chr1	88146698	88146699	Ugt1a10	1		chr11	29459055	29459056	Ccdc88a	1		chr19	29000092	29000093	Ak3	50
chr1	86278243	86278244	Ncl	2		chr1	89817379	89817380	Agap1	4		chr11	29463259	29463260	Prorsd1	1		chr19	31063854	31063855	Cstf2t	4
chr1	86278283	86278284	Ncl	4		chr1	89817495	89817496	Agap1	2		chr11	29692697	29692698	Rtn4	37		chr19	32492603	32492604	Minpp1	1
chr1	86278328	86278329	Ncl	2		chr1	90540517	90540518	Cops8	1		chr11	29692710	29692711	Rtn4	23		chr19	32650342	32650343	Atad1	3
chr1	86278333	86278334	Ncl	1		chr1	91151218	91151219	Ramp1	1		chr11	30049589	30049590	Sptbn1	1		chr19	34626776	34626777	Ifit1	2
chr1	86280258	86280259	Ncl	1		chr1	91248514	91248515	Scly	1		chr11	30049618	30049619	Sptbn1	1		chr19	36870119	36870120	Tnks2	12
chr1	86280908	86280909	Ncl	9		chr1	91303625	91303626	Ilkap	1		chr11	30456082	30456083	Acyp2	1		chr19	37248055	37248056	Ide	3
chr1	86280912	86280913	Ncl	10		chr1	92564973	92564974	Cops9	1		chr11	30456179	30456180	Acyp2	2		chr19	40539012	40539013	Aldh18a1	1
chr1	86282839	86282840	Ncl	1		chr1	93278685	93278686	Ppp1r7	1		chr11	33102724	33102725	Npm1	107		chr19	44062035	44062036	Chuk	3
chr1	86283803	86283804	Ncl	3		chr1	93333892	93333893	Hdlbp	1		chr11	33106082	33106083	Npm1	2		chr19	53234123	53234124	Add3	10
chr1	86283883	86283884	Ncl	3		chr1	93359045	93359046	Hdlbp	1		chr11	33113014	33113015	Npm1	1		chr19	60852903	60852904	Prdx3	1
chr1	86284428	86284429	Ncl	4		chr1	93435669	93435670	Septin2	2		chr11	35681922	35681923	Pank3	5		chr2	9956801	9956802	Taf3	1
chr1	86285013	86285014	Ncl	1		chr1	93436724	93436725	Septin2	4		chr11	43334155	43334156	Slu7	1		chr2	20852892	20852893	Arhgap21	2
chr1	86285076	86285077	Ncl	1		chr1	93436877	93436878	Septin2	2		chr11	50091284	50091285	Sqstm1	114		chr2	20974859	20974860	Gm13375	1
chr1	86285082	86285083	Ncl	1		chr1	93436883	93436884	Septin2	8		chr11	50186052	50186053	Canx	29		chr2	25112474	25112475	Tubb4b	1
chr1	86454522	86454523	Ptma	1		chr1	93436886	93436887	Septin2	12		chr11	50186177	50186178	Canx	1		chr2	32122484	32122485	Prrc2b	3
chr1	86454662	86454663	Ptma	2		chr1	93436925	93436926	Septin2	13		chr11	50192688	50192689	Canx	1		chr2	58336654	58336655	Acvr1	1
chr1	86454667	86454668	Ptma	7		chr1	93436954	93436955	Septin2	1		chr11	51876885	51876886	Ube2b	2		chr2	59729856	59729857	Baz2b	3
chr1	86454668	86454669	Ptma	9		chr1	93437089	93437090	Septin2	4		chr11	52137456	52137457	Skp1	4		chr2	83707074	83707075	Fam171b	3
chr1	86458103	86458104	Ptma	4		chr1	93437139	93437140	Septin2	4		chr11	52280083	52280084	Vdac1	5		chr2	102642710	102642711	Cd44	1
chr1	86458107	86458108	Ptma	16		chr1	93437240	93437241	Septin2	6		chr11	52299196	52299197	9530068E07Rik	1		chr2	103595600	103595601	Caprin1	2
chr1	86458131	86458132	Ptma	6		chr1	93437247	93437248	Septin2	6		chr11	53311883	53311884	Aff4	1		chr2	104260298	104260299	Hipk3	2
chr1	86458214	86458215	Ptma	45		chr1	93437360	93437361	Septin2	18		chr11	53475112	53475113	Kif3a	2		chr2	121376195	121376196	Frmd5	5
chr1	86470826	86470827	Pde6d	1		chr1	93549856	93549857	Stk25	1		chr11	53492578	53492579	Kif3a	1		chr2	121376286	121376287	Frmd5	7
chr1	86470994	86470995	Pde6d	1		chr1	95261746	95261747	Fam174a	1		chr11	54393116	54393117	Fnip1	1		chr2	121983306	121983307	B2m	158
chr1	86471019	86471020	Pde6d	1		chr1	95261808	95261809	Fam174a	2		chr11	54608345	54608346	Cdc42se2	2		chr2	121983309	121983310	B2m	179
chr1	86594223	86594224	Nppc	3		chr1	95261964	95261965	Fam174a	1		chr11	55391001	55391002	G3bp1	3		chr2	126733772	126733773	Sppl2a	2
chr1	87238094	87238095	Efhd1	1		chr1	97571944	97571945	Macir	1		chr11	55391006	55391007	G3bp1	1		chr2	127140615	127140616	Stard7	4
chr1	87238376	87238377	Efhd1	1		chr1	97573002	97573003	Macir	6		chr11	57373960	57373961	Fam114a2	3		chr2	130395481	130395482	Ptpra	1
chr1	87378303	87378304	Gigyf2	2		chr1	97749013	97749014	Pam	11		chr11	60089739	60089740	Rai1	1		chr2	130395498	130395499	Ptpra	3
chr1	88627406	88627407	Arl4c	1		chr1	105961631	105961632	Zcchc2	1		chr11	62280591	62280592	Ncor1	1		chr2	131780322	131780323	Prnp	11
chr1	89817240	89817241	Agap1	1		chr1	105961636	105961637	Zcchc2	2		chr11	66925975	66925976	Tmem220	1		chr2	153608979	153608980	Mapre1	1
chr1	89817259	89817260	Agap1	1		chr1	106651796	106651797	Kdsr	1		chr11	68981618	68981619	Vamp2	5		chr2	155965789	155965790	Nfs1	2
chr1	89817310	89817311	Agap1	1		chr1	106651797	106651798	Kdsr	1		chr11	68981875	68981876	Vamp2	1		chr2	160545526	160545527	Top1	1
chr1	89818738	89818739	Agap1	1		chr1	106651848	106651849	Kdsr	2		chr11	69558044	69558045	Eif4a1	42		chr2	165131281	165131282	Elmo2	1
chr1	91213408	91213409	Ube2f	1		chr1	106699011	106699012	Vps4b	1		chr11	69885544	69885545	Gabarap	25		chr2	166739645	166739646	Arfgef2	4
chr1	91213422	91213423	Ube2f	1		chr1	106699093	106699094	Vps4b	1		chr11	70542907	70542908	Pfn1	111		chr2	166788059	166788060	Cse1l	1
chr1	91213428	91213429	Ube2f	1		chr1	106719444	106719445	Vps4b	1		chr11	70831692	70831693	Rabep1	1		chr2	179554163	179554164	Taf4	1
chr1	91213443	91213444	Ube2f	1		chr1	106719498	106719499	Vps4b	4		chr11	70833437	70833438	Rabep1	1		chr2	179679888	179679889	Psma7	1
chr1	91248581	91248582	Scly	1		chr1	106724155	106724156	Vps4b	1		chr11	70868747	70868748	C1qbp	5		chr2	181497860	181497861	Pcmtd2	1
chr1	91303625	91303626	Ilkap	1		chr1	111786612	111786613	Dsel	1		chr11	72817747	72817748	Zzef1	1		chr2	181497970	181497971	Pcmtd2	2
chr1	91487042	91487043	Asb1	1		chr1	118226389	118226390	Tsn	1		chr11	74561412	74561413	Cluh	1		chr3	8994751	8994752	Tpd52	2
chr1	93292891	93292892	Ppp1r7	1		chr1	118226417	118226418	Tsn	1		chr11	75655545	75655546	Ywhae	2		chr3	31106818	31106819	Prkci	1
chr1	93406779	93406780	Septin2	1		chr1	118227582	118227583	Tsn	2		chr11	75655943	75655944	Ywhae	2		chr3	32780941	32780942	Actl6a	1
chr1	93435668	93435669	Septin2	1		chr1	118228450	118228451	Tsn	1		chr11	75656195	75656196	Ywhae	87		chr3	65287289	65287290	Ssr3	4
chr1	93435670	93435671	Septin2	1		chr1	118228582	118228583	Tsn	1		chr11	75656244	75656245	Ywhae	22		chr3	69462402	69462403	Ppm1l	2
chr1	93436206	93436207	Septin2	1		chr1	120044149	120044150	Dbi	42		chr11	76670449	76670450	Cpd	9		chr3	75785164	75785165	Golim4	1
chr1	93436722	93436723	Septin2	1		chr1	120047626	120047627	Dbi	2		chr11	77428640	77428641	Taok1	3		chr3	75785210	75785211	Golim4	2
chr1	93436725	93436726	Septin2	3		chr1	121232220	121232221	Insig2	1		chr11	78073705	78073706	Rpl23a	10		chr3	94405034	94405035	Snx27	1
chr1	93436877	93436878	Septin2	1		chr1	121232363	121232364	Insig2	1		chr11	78146137	78146138	Sdf2	4		chr3	100471306	100471307	Man1a2	2
chr1	93436883	93436884	Septin2	1		chr1	121234650	121234651	Insig2	1		chr11	80251734	80251735	5730455P16Rik	1		chr3	102677054	102677055	Tspan2	2
chr1	93436886	93436887	Septin2	11		chr1	125320727	125320728	Actr3	1		chr11	80286777	80286778	Zfp207	1		chr3	103262694	103262695	Trim33	1
chr1	93437015	93437016	Septin2	2		chr1	125320851	125320852	Actr3	2		chr11	80362324	80362325	Psmd11	2		chr3	103262697	103262698	Trim33	1
chr1	93437089	93437090	Septin2	1		chr1	125320856	125320857	Actr3	2		chr11	84875475	84875476	Usp32	1		chr3	103262706	103262707	Trim33	1
chr1	93437360	93437361	Septin2	1		chr1	125320905	125320906	Actr3	1		chr11	86158835	86158836	Med13	1		chr3	103647347	103647348	Hipk1	3
chr1	93633289	93633290	Thap4	1		chr1	125321247	125321248	Actr3	1		chr11	86189320	86189321	Med13	1		chr3	107648820	107648821	Csf1	1
chr1	93633307	93633308	Thap4	1		chr1	125523134	125523135	Slc35f5	1		chr11	86390008	86390009	Rps6kb1	1		chr3	107919672	107919673	Gstm1	1
chr1	95261963	95261964	Fam174a	2		chr1	125523157	125523158	Slc35f5	1		chr11	86393630	86393631	Rps6kb1	1		chr3	107919673	107919674	Gstm1	1
chr1	95262040	95262041	Fam174a	5		chr1	127871439	127871440	Rab3gap1	3		chr11	86586208	86586209	Cltc	4		chr3	107919692	107919693	Gstm1	16
chr1	97571780	97571781	Macir	1		chr1	128102960	128102961	R3hdm1	1		chr11	86586218	86586219	Cltc	10		chr3	115904586	115904587	Vcam1	2
chr1	97572962	97572963	Macir	1		chr1	128165143	128165144	R3hdm1	1		chr11	86586257	86586258	Cltc	22		chr3	135171531	135171532	Ube2d3	4
chr1	97749083	97749084	Pam	1		chr1	128183883	128183884	Ubxn4	1		chr11	87111214	87111215	Trim37	1		chr3	135171613	135171614	Ube2d3	2
chr1	104922944	104922945	Cdh20	1		chr1	128206990	128206991	Ubxn4	4		chr11	87942056	87942057	Srsf1	5		chr3	135172193	135172194	Ube2d3	2
chr1	104923056	104923057	Cdh20	1		chr1	128291921	128291922	Dars	1		chr11	93973682	93973683	Spag9	1		chr3	137614375	137614376	Dnajb14	2
chr1	105961636	105961637	Zcchc2	1		chr1	131849736	131849737	Nucks1	1		chr11	94016509	94016510	Spag9	1		chr3	137614394	137614395	Dnajb14	3
chr1	106651845	106651846	Kdsr	1		chr1	132437215	132437216	Cntn2	2		chr11	94182118	94182119	Luc7l3	2		chr3	145649741	145649742	2410004B18Rik	3
chr1	106699116	106699117	Vps4b	1		chr1	132439702	132439703	Cntn2	11		chr11	94917162	94917163	Pdk2	7		chr3	145649823	145649824	2410004B18Rik	10
chr1	106717748	106717749	Vps4b	1		chr1	132440134	132440135	Cntn2	7		chr11	95165392	95165393	Kat7	2		chr3	146171232	146171233	Ctbs	1
chr1	110817052	110817053	Cdh19	1		chr1	133061236	133061237	Ppp1r15b	1		chr11	95382976	95382977	Spop	2		chr3	151436688	151436689	Ifi44	1
chr1	118226546	118226547	Tsn	1		chr1	133061249	133061250	Ppp1r15b	1		chr11	95383114	95383115	Spop	1		chr3	152491203	152491204	Pigk	1
chr1	118260963	118260964	Nifk	1		chr1	133065880	133065881	Ppp1r15b	1		chr11	95383128	95383129	Spop	2		chr3	153628317	153628318	Acadm	1
chr1	119595346	119595347	Ptpn4	1		chr1	133065988	133065989	Ppp1r15b	1		chr11	95383197	95383198	Spop	6		chr4	4762757	4762758	Bpnt2	5
chr1	120044149	120044150	Dbi	1		chr1	133067265	133067266	Ppp1r15b	2		chr11	96844312	96844313	Sp2	1		chr4	19519475	19519476	Cpne3	1
chr1	121232261	121232262	Insig2	1		chr1	133067296	133067297	Ppp1r15b	9		chr11	97392894	97392895	Arhgap23	6		chr4	19611708	19611709	Wwp1	14
chr1	121233610	121233611	Insig2	1		chr1	133536684	133536685	Snrpe	2		chr11	98043034	98043035	Med1	1		chr4	19611747	19611748	Wwp1	2
chr1	125320837	125320838	Actr3	28		chr1	133547939	133547940	Zc3h11a	1		chr11	98328799	98328800	Mien1	7		chr4	40965147	40965148	Chmp5	4
chr1	125320894	125320895	Actr3	1		chr1	133548014	133548015	Zc3h11a	1		chr11	98659539	98659540	Thra	2		chr4	41190917	41190918	Ube2r2	1
chr1	125321591	125321592	Actr3	2		chr1	133568353	133568354	Zc3h11a	3		chr11	100367231	100367232	Acly	1		chr4	41191048	41191049	Ube2r2	3
chr1	125331134	125331135	Actr3	1		chr1	134003231	134003232	Btg2	1		chr11	100954332	100954333	Atp6v0a1	1		chr4	56995283	56995284	Epb41l4b	1
chr1	125331137	125331138	Actr3	3		chr1	134003318	134003319	Btg2	2		chr11	100954357	100954358	Atp6v0a1	1		chr4	56995302	56995303	Epb41l4b	1
chr1	125523080	125523081	Slc35f5	1		chr1	134003447	134003448	Btg2	1		chr11	101169058	101169059	Coa3	1		chr4	56995375	56995376	Epb41l4b	1
chr1	125523155	125523156	Slc35f5	1		chr1	134275084	134275085	Tmem183a	1		chr11	101472668	101472669	Nbr1	3		chr4	56995388	56995389	Epb41l4b	1
chr1	125523192	125523193	Slc35f5	1		chr1	134359839	134359840	Adipor1	3		chr11	105949830	105949831	Dcaf7	3		chr4	70351155	70351156	Megf9	1
chr1	127418825	127418826	Tmem163	2		chr1	134359843	134359844	Adipor1	2		chr11	106101201	106101202	Ccdc47	1		chr4	81196854	81196855	Mpdz	2
chr1	127418830	127418831	Tmem163	1		chr1	134359853	134359854	Adipor1	3		chr11	106393495	106393496	Tex2	7		chr4	81196874	81196875	Mpdz	2
chr1	127418859	127418860	Tmem163	2		chr1	134359941	134359942	Adipor1	1		chr11	106671483	106671484	Ddx5	1		chr4	82208913	82208914	Nfib	1
chr1	127418865	127418866	Tmem163	4		chr1	135083760	135083761	Arl8a	2		chr11	106672536	106672537	Ddx5	65		chr4	82214562	82214563	Nfib	3
chr1	127871452	127871453	Rab3gap1	1		chr1	135083773	135083774	Arl8a	3		chr11	106672590	106672591	Ddx5	4		chr4	100860773	100860774	Cachd1	1
chr1	127871470	127871471	Rab3gap1	1		chr1	135083775	135083776	Arl8a	1		chr11	106676334	106676335	Ddx5	1		chr4	101010275	101010276	Jak1	3
chr1	128102831	128102832	R3hdm1	1		chr1	135229466	135229467	Timm17a	2		chr11	107765607	107765608	Cacng5	2		chr4	101010297	101010298	Jak1	1
chr1	128102835	128102836	R3hdm1	1		chr1	135679740	135679741	Csrp1	1		chr11	109559588	109559589	Prkar1a	4		chr4	106519723	106519724	Ttc4	2
chr1	128102865	128102866	R3hdm1	1		chr1	135696723	135696724	Phlda3	1		chr11	110160504	110160505	Abca5	1		chr4	107057935	107057936	Tmem59	44
chr1	128165138	128165139	R3hdm1	1		chr1	136557486	136557487	Zfp281	4		chr11	112676665	112676666	Sox9	1		chr4	107901126	107901127	Scp2	5
chr1	128165227	128165228	R3hdm1	1		chr1	138411997	138411998	Nek7	3		chr11	112935027	112935028	2610035D17Rik	4		chr4	107901168	107901169	Scp2	4
chr1	128186717	128186718	Ubxn4	2		chr1	138412125	138412126	Nek7	2		chr11	115499095	115499096	Mif4gd	2		chr4	109840318	109840319	Dmrta2	1
chr1	128202624	128202625	Ubxn4	1		chr1	138412134	138412135	Nek7	1		chr11	115535082	115535083	Grb2	4		chr4	118065684	118065685	Ptprf	21
chr1	128202680	128202681	Ubxn4	1		chr1	143483412	143483413	Cdc73	1		chr11	115969427	115969428	Wbp2	6		chr4	118065750	118065751	Ptprf	3
chr1	128204984	128204985	Ubxn4	1		chr1	143626835	143626836	Ro60	1		chr11	116329712	116329713	Ubald2	1		chr4	124748853	124748854	Yrdc	1
chr1	128205088	128205089	Ubxn4	1		chr1	144120694	144120695	Rgs1	1		chr11	117050035	117050036	Sec14l1	3		chr4	126333103	126333104	Ago1	1
chr1	128206990	128206991	Ubxn4	2		chr1	144120697	144120698	Rgs1	1		chr11	118192127	118192128	Timp2	4		chr4	129410127	129410128	Hdac1	1
chr1	128291882	128291883	Dars	1		chr1	149705649	149705650	Pla2g4a	1		chr11	118192151	118192152	Timp2	4		chr4	129733380	129733381	Ptp4a2	4
chr1	131182598	131182599	Ikbke	1		chr1	149748401	149748402	Pla2g4a	1		chr11	118192236	118192237	Timp2	2		chr4	129743481	129743482	Ptp4a2	1
chr1	131860435	131860436	Nucks1	1		chr1	149983445	149983446	Ptgs2	1		chr11	118193289	118193290	Timp2	2		chr4	132581631	132581632	Stx12	3
chr1	131860543	131860544	Nucks1	1		chr1	150237183	150237184	Odr4	1		chr11	118283790	118283791	Lgals3bp	51		chr4	134154611	134154612	Pafah2	2
chr1	131860546	131860547	Nucks1	1		chr1	150238588	150238589	Odr4	1		chr11	118283933	118283934	Lgals3bp	40		chr4	134253010	134253011	Mtfr1l	3
chr1	132433192	132433193	Rbbp5	1		chr1	150257324	150257325	Odr4	1		chr11	118971295	118971296	Cbx4	7		chr4	136268045	136268046	Luzp1	2
chr1	132433279	132433280	Rbbp5	1		chr1	150274381	150274382	Tpr	1		chr11	120236711	120236712	Actg1	284		chr4	138041025	138041026	Pink1	2
chr1	132439683	132439684	Cntn2	1		chr1	150279777	150279778	Tpr	2		chr11	120236880	120236881	Actg1	39		chr4	141866770	141866771	Kazn	10
chr1	132439720	132439721	Cntn2	1		chr1	150290491	150290492	Tpr	1		chr11	120852722	120852723	Csnk1d	13		chr5	23708421	23708422	Srpk2	1
chr1	132492639	132492640	Nfasc	1		chr1	150324961	150324962	Tpr	2		chr11	121218387	121218388	Wdr45b	2		chr5	31314366	31314367	Gtf3c2	1
chr1	132492642	132492643	Nfasc	1		chr1	150325508	150325509	Prg4	3		chr11	121218389	121218390	Wdr45b	3		chr5	31314439	31314440	Gtf3c2	2
chr1	132492739	132492740	Nfasc	1		chr1	151239833	151239834	Ivns1abp	1		chr12	3299496	3299497	Rab10	1		chr5	32648700	32648701	Ppp1cb	1
chr1	132492775	132492776	Nfasc	1		chr1	151240040	151240041	Ivns1abp	2		chr12	3299499	3299500	Rab10	3		chr5	44332587	44332588	Tapt1	1
chr1	132914054	132914055	Mdm4	1		chr1	151697889	151697890	Edem3	1		chr12	3299849	3299850	Rab10	2		chr5	73792740	73792741	Sgcb	5
chr1	133067340	133067341	Ppp1r15b	1		chr1	152647194	152647195	Arpc5	1		chr12	3453905	3453906	Kif3c	2		chr5	74702762	74702763	Fip1l1	2
chr1	133067345	133067346	Ppp1r15b	1		chr1	152650655	152650656	Arpc5	1		chr12	4012654	4012655	Efr3b	2		chr5	77234950	77234951	Hopx	4
chr1	133547742	133547743	Zc3h11a	1		chr1	152650663	152650664	Arpc5	4		chr12	4930097	4930098	Ubxn2a	1		chr5	77497198	77497199	Igfbp7	1
chr1	133547769	133547770	Zc3h11a	1		chr1	152650777	152650778	Arpc5	8		chr12	8548085	8548086	Rhob	84		chr5	92406261	92406262	Naaa	1
chr1	133547809	133547810	Zc3h11a	1		chr1	152650957	152650958	Arpc5	1		chr12	8799783	8799784	Pum2	1		chr5	92589355	92589356	Scarb2	17
chr1	133547820	133547821	Zc3h11a	3		chr1	152651064	152651065	Arpc5	5		chr12	8799836	8799837	Pum2	1		chr5	100950973	100950974	Mrps18c	1
chr1	133547822	133547823	Zc3h11a	1		chr1	152651131	152651132	Arpc5	3		chr12	12424836	12424837	Cyria	1		chr5	101971510	101971511	Cds1	1
chr1	133547939	133547940	Zc3h11a	1		chr1	152651134	152651135	Arpc5	7		chr12	13269361	13269362	Ddx1	2		chr5	104137733	104137734	Hsd17b11	10
chr1	133566848	133566849	Zc3h11a	1		chr1	152651137	152651138	Arpc5	10		chr12	16876509	16876510	E2f6	1		chr5	104137761	104137762	Hsd17b11	5
chr1	133566879	133566880	Zc3h11a	1		chr1	152651138	152651139	Arpc5	5		chr12	17036245	17036246	Rock2	1		chr5	115472359	115472360	Gatc	1
chr1	133566930	133566931	Zc3h11a	1		chr1	152711900	152711901	Ncf2	1		chr12	17036462	17036463	Rock2	1		chr5	115472361	115472362	Gatc	2
chr1	133568353	133568354	Zc3h11a	6		chr1	153094742	153094743	Lamc1	3		chr12	25109172	25109173	Kidins220	1		chr5	121952568	121952569	Atxn2	2
chr1	134003294	134003295	Btg2	16		chr1	153094853	153094854	Lamc1	4		chr12	32902993	32902994	Nampt	2		chr5	122591670	122591671	Atp2a2	5
chr1	134003318	134003319	Btg2	18		chr1	153094857	153094858	Lamc1	15		chr12	33004333	33004334	Sypl	1		chr5	123510864	123510865	Bcl7a	2
chr1	134127057	134127058	Adora1	1		chr1	153095176	153095177	Lamc1	1		chr12	51790776	51790777	Hectd1	3		chr5	124911567	124911568	Ccdc92	2
chr1	134359746	134359747	Adipor1	1		chr1	153335154	153335155	Dhx9	1		chr12	52614098	52614099	Arhgap5	5		chr5	125537209	125537210	Bri3bp	1
chr1	134359752	134359753	Adipor1	3		chr1	153342924	153342925	Dhx9	1		chr12	54720458	54720459	Eapp	1		chr5	125869564	125869565	Tmem132b	4
chr1	134359772	134359773	Adipor1	9		chr1	153783924	153783925	Glul	20		chr12	54793447	54793448	Snx6	3		chr5	129867670	129867671	Cct6a	7
chr1	134359839	134359840	Adipor1	4		chr1	153785052	153785053	Glul	35		chr12	55817545	55817546	Ralgapa1	2		chr5	147048047	147048048	Polr1d	2
chr1	134359843	134359844	Adipor1	6		chr1	153785081	153785082	Glul	46		chr12	57286855	57286856	Prps1l3	1		chr6	5164775	5164776	Ppp1r9a	1
chr1	134359941	134359942	Adipor1	7		chr1	153785086	153785087	Glul	79		chr12	65109305	65109306	Fkbp3	1		chr6	13087777	13087778	Tmem106b	2
chr1	134418340	134418341	Klhl12	1		chr1	153785091	153785092	Glul	136		chr12	66513838	66513839	Mdga2	1		chr6	13087847	13087848	Tmem106b	3
chr1	135312329	135312330	Ipo9	1		chr1	153785149	153785150	Glul	43		chr12	69205800	69205801	Rps29	2		chr6	13087881	13087882	Tmem106b	1
chr1	135312337	135312338	Ipo9	2		chr1	153785203	153785204	Glul	101		chr12	69232494	69232495	Mgat2	2		chr6	13581397	13581398	Tmem168	4
chr1	135312555	135312556	Ipo9	1		chr1	153785302	153785303	Glul	15		chr12	69357096	69357097	Klhdc2	1		chr6	13869987	13869988	2610001J05Rik	9
chr1	135696734	135696735	Phlda3	1		chr1	153785348	153785349	Glul	5		chr12	69358613	69358614	Nemf	3		chr6	34373751	34373752	Akr1b10	2
chr1	135696748	135696749	Phlda3	1		chr1	155151586	155151587	Xpr1	1		chr12	69420287	69420288	Arf6	2		chr6	35238408	35238409	1810058I24Rik	2
chr1	136197489	136197490	Camsap2	1		chr1	155151650	155151651	Xpr1	1		chr12	69420315	69420316	Arf6	7		chr6	35238423	35238424	1810058I24Rik	29
chr1	136557563	136557564	Zfp281	1		chr1	155151716	155151717	Xpr1	1		chr12	69420354	69420355	Arf6	2		chr6	39116436	39116437	Kdm7a	1
chr1	137991402	137991403	Ptprc	3		chr1	155880724	155880725	Tor1aip1	1		chr12	71037271	71037272	Psma3	3		chr6	39779257	39779258	Mrps33	4
chr1	138411997	138411998	Nek7	3		chr1	155928114	155928115	Tor1aip2	2		chr12	72037521	72037522	Daam1	2		chr6	49061547	49061548	Malsu1	1
chr1	138411999	138412000	Nek7	4		chr1	155929131	155929132	Tor1aip2	4		chr12	72037525	72037526	Daam1	5		chr6	51567325	51567326	Snx10	6
chr1	138412128	138412129	Nek7	4		chr1	155944400	155944401	Tor1aip2	1		chr12	72146832	72146833	Jkamp	2		chr6	52523356	52523357	Hibadh	1
chr1	138413825	138413826	Nek7	2		chr1	155944484	155944485	Tor1aip2	1		chr12	72148014	72148015	Jkamp	9		chr6	52523398	52523399	Hibadh	6
chr1	138414037	138414038	Nek7	1		chr1	156257548	156257549	Soat1	1		chr12	72626586	72626587	Pcnx4	2		chr6	52743153	52743154	Tax1bp1	1
chr1	139102248	139102249	Dennd1b	3		chr1	156481352	156481353	Tor3a	1		chr12	72841119	72841120	Ppm1a	1		chr6	56856117	56856118	Fkbp9	8
chr1	143482041	143482042	Cdc73	1		chr1	157247553	157247554	2810025M15Rik	3		chr12	72841148	72841149	Ppm1a	3		chr6	57640813	57640814	Herc6	1
chr1	143620848	143620849	Glrx2	1		chr1	159172504	159172505	Cop1	1		chr12	73989071	73989072	Hif1a	1		chr6	58882288	58882289	Nap1l5	8
chr1	143682500	143682501	Uchl5	2		chr1	159903279	159903280	4930523C07Rik	1		chr12	73993625	73993626	Hif1a	2		chr6	58883145	58883146	Nap1l5	3
chr1	144124234	144124235	Rgs1	3		chr1	160030918	160030919	Cacybp	5		chr12	75499597	75499598	Ppp2r5e	1		chr6	72587654	72587655	Tgoln1	3
chr1	150238242	150238243	Odr4	1		chr1	160030919	160030920	Cacybp	4		chr12	75500384	75500385	Ppp2r5e	1		chr6	86252654	86252655	Tgfa	3
chr1	150238583	150238584	Odr4	1		chr1	160030933	160030934	Cacybp	1		chr12	75500396	75500397	Ppp2r5e	2		chr6	87820179	87820180	Cnbp	1
chr1	150274380	150274381	Tpr	3		chr1	160034216	160034217	Cacybp	2		chr12	76366365	76366366	Mthfd1	1		chr6	87820184	87820185	Cnbp	2
chr1	150290207	150290208	Tpr	1		chr1	160035980	160035981	Cacybp	1		chr12	77522586	77522587	Fut8	2		chr6	87976623	87976624	Rab7	1
chr1	150290479	150290480	Tpr	2		chr1	160036078	160036079	Cacybp	1		chr12	78890010	78890011	Atp6v1d	4		chr6	88080720	88080721	Rpn1	5
chr1	150299618	150299619	Tpr	2		chr1	160036079	160036080	Cacybp	3		chr12	80383616	80383617	Dcaf5	2		chr6	90451936	90451937	Klf15	1
chr1	150323372	150323373	Tpr	1		chr1	160047045	160047046	Rabgap1l	1		chr12	80727789	80727790	Slc39a9	1		chr6	90636755	90636756	Iqsec1	2
chr1	150324945	150324946	Tpr	4		chr1	160051394	160051395	Rabgap1l	1		chr12	82043234	82043235	Pcnx	1		chr6	92163968	92163969	Rbsn	1
chr1	151239795	151239796	Ivns1abp	1		chr1	160802354	160802355	Rc3h1	2		chr12	83707119	83707120	Rbm25	3		chr6	99602255	99602256	Eif4e3	2
chr1	151287158	151287159	Swt1	1		chr1	160869263	160869264	Dars2	1		chr12	84465257	84465258	Rnf113a2	1		chr6	108084985	108084986	Sumf1	2
chr1	151345315	151345316	Rnf2	1		chr1	160916104	160916105	Klhl20	1		chr12	85387632	85387633	Tmed10	4		chr6	119332468	119332469	Adipor2	26
chr1	152650201	152650202	Arpc5	1		chr1	160916226	160916227	Klhl20	1		chr12	87011925	87011926	Cipc	4		chr6	142436120	142436121	Ldhb	4
chr1	152650604	152650605	Arpc5	1		chr1	161068645	161068646	Prdx6	1		chr12	87506216	87506217	Snw1	7		chr6	145166023	145166024	Kras	1
chr1	152650612	152650613	Arpc5	6		chr1	161068858	161068859	Prdx6	7		chr12	91602269	91602270	Ston2	1		chr6	146500522	146500523	Fgfr1op2	1
chr1	152650638	152650639	Arpc5	1		chr1	161068898	161068899	Prdx6	2		chr12	91772971	91772972	Sel1l	22		chr6	146500532	146500533	Fgfr1op2	5
chr1	152650652	152650653	Arpc5	4		chr1	161068899	161068900	Prdx6	2		chr12	91772976	91772977	Sel1l	7		chr7	30021059	30021060	Sdhaf1	4
chr1	152650663	152650664	Arpc5	1		chr1	161069029	161069030	Prdx6	1		chr12	91773555	91773556	Sel1l	1		chr7	33840334	33840335	Uba2	2
chr1	152650679	152650680	Arpc5	4		chr1	161646317	161646318	Suco	1		chr12	100172904	100172905	Calm1	6		chr7	63990387	63990388	Mtmr10	2
chr1	152650802	152650803	Arpc5	1		chr1	162422706	162422707	Vamp4	1		chr12	102463958	102463959	Golga5	2		chr7	64946154	64946155	Tjp1	7
chr1	152650806	152650807	Arpc5	1		chr1	162499653	162499654	Prrc2c	6		chr12	102464000	102464001	Golga5	1		chr7	65739060	65739061	Selenos	10
chr1	152651026	152651027	Arpc5	1		chr1	162499684	162499685	Prrc2c	1		chr12	103374351	103374352	Ddx24	13		chr7	80992584	80992585	Rps17	2
chr1	152651134	152651135	Arpc5	9		chr1	162538150	162538151	Prrc2c	2		chr12	108781941	108781942	Yy1	1		chr7	97367891	97367892	Clns1a	3
chr1	152651135	152651136	Arpc5	7		chr1	162538387	162538388	Prrc2c	1		chr12	110633117	110633118	Dync1h1	1		chr7	98536235	98536236	Uvrag	2
chr1	152651137	152651138	Arpc5	15		chr1	162538390	162538391	Prrc2c	1		chr12	110660528	110660529	Hsp90aa1	5		chr7	104121240	104121241	Trim30d	1
chr1	152651138	152651139	Arpc5	10		chr1	162538392	162538393	Prrc2c	1		chr12	110661546	110661547	Hsp90aa1	10		chr7	109881617	109881618	Swap70	1
chr1	152713033	152713034	Smg7	1		chr1	163743680	163743681	Kifap3	1		chr12	111228836	111228837	Traf3	3		chr7	110671547	110671548	Eif4g2	2
chr1	152713056	152713057	Smg7	1		chr1	163744377	163744378	Kifap3	1		chr12	111508244	111508245	Eif5	2		chr7	110671567	110671568	Eif4g2	1
chr1	152713148	152713149	Smg7	1		chr1	163744422	163744423	Kifap3	6		chr13	3615930	3615931	Gdi2	2		chr7	113169729	113169730	Far1	3
chr1	153331738	153331739	Dhx9	1		chr1	163744457	163744458	Kifap3	3		chr13	3616023	3616024	Gdi2	1		chr7	118571395	118571396	Gprc5b	3
chr1	153331794	153331795	Dhx9	1		chr1	165002152	165002153	Sft2d2	1		chr13	9208216	9208217	Larp4b	1		chr7	125700955	125700956	Xpo6	1
chr1	153345350	153345351	Dhx9	1		chr1	165002185	165002186	Sft2d2	1		chr13	9735382	9735383	Zmynd11	2		chr7	131046212	131046213	Acadsb	3
chr1	153784076	153784077	Glul	1		chr1	165002783	165002784	Sft2d2	1		chr13	14799825	14799826	Psma2	2		chr7	131046243	131046244	Acadsb	2
chr1	153784451	153784452	Glul	1		chr1	165003394	165003395	Sft2d2	1		chr13	19050632	19050633	Vps41	1		chr7	131046254	131046255	Acadsb	4
chr1	153785086	153785087	Glul	6		chr1	165055983	165055984	Tiprl	2		chr13	19050729	19050730	Vps41	2		chr7	131046305	131046306	Acadsb	2
chr1	155079163	155079164	Stx6	2		chr1	166220889	166220890	Tada1	4		chr13	19050896	19050897	Vps41	1		chr8	23939446	23939447	Sfrp1	2
chr1	155151623	155151624	Xpr1	1		chr1	166222979	166222980	Pogk	1		chr13	20790318	20790319	Elmo1	1		chr8	27529105	27529106	Erlin2	2
chr1	155151639	155151640	Xpr1	4		chr1	166223003	166223004	Pogk	3		chr13	21626666	21626667	Zscan26	2		chr8	39618299	39618300	Tusc3	1
chr1	155720861	155720862	Cep350	1		chr1	167053788	167053789	Uck2	1		chr13	34257910	34257911	Bphl	2		chr8	40945730	40945731	Cnot7	2
chr1	155720967	155720968	Cep350	1		chr1	167053877	167053878	Uck2	1		chr13	34311390	34311391	Tubb2b	1		chr8	40945740	40945741	Cnot7	1
chr1	155829354	155829355	Cep350	1		chr1	167136380	167136381	Tmco1	1		chr13	38135723	38135724	Rreb1	2		chr8	57044806	57044807	Fbxo8	1
chr1	155880470	155880471	Tor1aip1	3		chr1	167158068	167158069	Tmco1	1		chr13	38160036	38160037	Ssr1	1		chr8	65045820	65045821	Cpe	16
chr1	155880684	155880685	Tor1aip1	6		chr1	167158113	167158114	Tmco1	1		chr13	38161800	38161801	Ssr1	1		chr8	80066172	80066173	Smad1	10
chr1	155880797	155880798	Tor1aip1	2		chr1	167158158	167158159	Tmco1	3		chr13	38162572	38162573	Ssr1	1		chr8	86445436	86445437	Itfg1	1
chr1	155882769	155882770	Tor1aip1	1		chr1	167158264	167158265	Tmco1	1		chr13	41175872	41175873	Tmem14c	3		chr8	86445438	86445439	Itfg1	1
chr1	155927572	155927573	Tor1aip2	1		chr1	167195355	167195356	Aldh9a1	2		chr13	43291709	43291710	Phactr1	9		chr8	88860932	88860933	Cnep1r1	2
chr1	155928168	155928169	Tor1aip2	2		chr1	167195410	167195411	Aldh9a1	5		chr13	46831386	46831387	Fam8a1	2		chr8	89754701	89754702	Sall1	2
chr1	155928331	155928332	Tor1aip2	6		chr1	169969896	169969897	Uap1	1		chr13	47238513	47238514	Dek	2		chr8	94698774	94698775	Amfr	7
chr1	155928387	155928388	Tor1aip2	1		chr1	170021185	170021186	Uhmk1	2		chr13	48732832	48732833	Ptpdc1	1		chr8	94698875	94698876	Amfr	1
chr1	155928398	155928399	Tor1aip2	1		chr1	170788296	170788297	Fcgr2b	1		chr13	48732921	48732922	Ptpdc1	5		chr8	110398030	110398031	Ist1	5
chr1	155944519	155944520	Tor1aip2	1		chr1	170788365	170788366	Fcgr2b	2		chr13	48955439	48955440	Phf2	1		chr8	118187388	118187389	Cmip	1
chr1	156481568	156481569	Tor3a	1		chr1	170788367	170788368	Fcgr2b	1		chr13	49032903	49032904	Fam120a	6		chr8	122325659	122325660	Zcchc14	3
chr1	157247531	157247532	2810025M15Rik	2		chr1	170878970	170878971	Fcgr3	2		chr13	49033978	49033979	Fam120a	1		chr8	122325662	122325663	Zcchc14	1
chr1	157247622	157247623	2810025M15Rik	1		chr1	170878974	170878975	Fcgr3	3		chr13	49616315	49616316	Ippk	1		chr8	122327255	122327256	Zcchc14	2
chr1	159170398	159170399	Cop1	1		chr1	170879121	170879122	Fcgr3	2		chr13	53487097	53487098	Sptlc1	2		chr8	123770280	123770281	2810013P06Rik	3
chr1	159172501	159172502	Cop1	2		chr1	170885287	170885288	Fcgr3	1		chr13	54699168	54699169	4833439L19Rik	10		chr8	123770282	123770283	2810013P06Rik	2
chr1	160030711	160030712	Cacybp	1		chr1	171057395	171057396	Fcer1g	8		chr13	54730484	54730485	Arl10	3		chr8	123770290	123770291	2810013P06Rik	2
chr1	160030919	160030920	Cacybp	4		chr1	171057399	171057400	Fcer1g	7		chr13	54740912	54740913	Cltb	8		chr8	123770293	123770294	2810013P06Rik	1
chr1	160036079	160036080	Cacybp	1		chr1	171087896	171087897	Adamts4	1		chr13	54741522	54741523	Cltb	1		chr8	123770354	123770355	2810013P06Rik	1
chr1	160047045	160047046	Rabgap1l	1		chr1	171088023	171088024	Adamts4	1		chr13	55461758	55461759	Nsd1	1		chr9	15194840	15194841	4931406C07Rik	1
chr1	160051354	160051355	Rabgap1l	1		chr1	171116504	171116505	Ufc1	3		chr13	55758173	55758174	B4galt7	1		chr9	21418370	21418371	Dnm2	1
chr1	160795941	160795942	Rc3h1	1		chr1	171170041	171170042	Nit1	1		chr13	56887823	56887824	Smad5	1		chr9	31062018	31062019	Aplp2	6
chr1	160802384	160802385	Rc3h1	2		chr1	171246066	171246067	Usf1	1		chr13	58273741	58273742	Hnrnpa0	6		chr9	36642812	36642813	Stt3a	1
chr1	160916104	160916105	Klhl20	2		chr1	171532461	171532462	Cd48	1		chr13	58325384	58325385	Ubqln1	1		chr9	36642864	36642865	Stt3a	1
chr1	161068716	161068717	Prdx6	1		chr1	171893754	171893755	Ncstn	1		chr13	58391621	58391622	Gkap1	2		chr9	37297606	37297607	Hepacam	1
chr1	161068727	161068728	Prdx6	4		chr1	171893900	171893901	Ncstn	8		chr13	58539266	58539267	Hnrnpk	9		chr9	45773437	45773438	Bace1	13
chr1	161068757	161068758	Prdx6	1		chr1	171893901	171893902	Ncstn	7		chr13	58544708	58544709	Hnrnpk	1		chr9	54510934	54510935	Idh3a	7
chr1	161815097	161815098	Dnm3	1		chr1	171893903	171893904	Ncstn	1		chr13	59903493	59903494	Isca1	1		chr9	54865200	54865201	Psma4	3
chr1	161819392	161819393	Dnm3	1		chr1	171893904	171893905	Ncstn	5		chr13	60910848	60910849	Dapk1	1		chr9	55965903	55965904	Rcn2	5
chr1	161819396	161819397	Dnm3	2		chr1	171893907	171893908	Ncstn	1		chr13	60910875	60910876	Dapk1	1		chr9	62286063	62286064	Anp32a	1
chr1	162538151	162538152	Prrc2c	1		chr1	171949532	171949533	Copa	5		chr13	64511748	64511749	Ctsl	18		chr9	64894412	64894413	Hacd3	8
chr1	162538220	162538221	Prrc2c	2		chr1	171949536	171949537	Copa	7		chr13	64511920	64511921	Ctsl	6		chr9	66683546	66683547	Aph1b	1
chr1	162538301	162538302	Prrc2c	1		chr1	171949545	171949546	Copa	3		chr13	65213252	65213253	Mfsd14b	3		chr9	69398926	69398927	Anxa2	1
chr1	163743380	163743381	Kifap3	1		chr1	171949546	171949547	Copa	3		chr13	67663999	67664000	Zfp87	1		chr9	69398949	69398950	Anxa2	3
chr1	163743424	163743425	Kifap3	1		chr1	171949606	171949607	Copa	4		chr13	74451822	74451823	Pdcd6	6		chr9	69398983	69398984	Anxa2	1
chr1	163744421	163744422	Kifap3	1		chr1	171949611	171949612	Copa	3		chr13	74471092	74471093	Sdha	1		chr9	70687407	70687408	Adam10	6
chr1	163744445	163744446	Kifap3	1		chr1	171949613	171949614	Copa	6		chr13	74816153	74816154	Erap1	1		chr9	72656801	72656802	Nedd4	1
chr1	163744455	163744456	Kifap3	1		chr1	171949618	171949619	Copa	4		chr13	86193913	86193914	Cox7c	122		chr9	73030521	73030522	Rsl24d1	1
chr1	163744457	163744458	Kifap3	3		chr1	171949674	171949675	Copa	1		chr13	89469314	89469315	Edil3	5		chr9	75550773	75550774	Scg3	3
chr1	165042753	165042754	Tiprl	2		chr1	171949676	171949677	Copa	3		chr13	89469375	89469376	Edil3	2		chr9	77701223	77701224	Gclc	1
chr1	165055983	165055984	Tiprl	1		chr1	171949711	171949712	Copa	10		chr13	89469404	89469405	Edil3	1		chr9	78385946	78385947	Eef1a1	282
chr1	165307058	165307059	Mpc2	3		chr1	172022739	172022740	Dcaf8	2		chr13	99558545	99558546	Map1b	1		chr9	79678321	79678322	Tmem30a	2
chr1	165308533	165308534	Mpc2	1		chr1	172024301	172024302	Pea15a	2		chr13	99570119	99570120	Map1b	1		chr9	95373223	95373224	U2surp	1
chr1	165308656	165308657	Mpc2	1		chr1	172024440	172024441	Pea15a	2		chr13	100085217	100085218	Mccc2	1		chr9	98972215	98972216	Pik3cb	1
chr1	166222852	166222853	Pogk	1		chr1	172024618	172024619	Pea15a	4		chr13	101820439	101820440	Pik3r1	3		chr9	105290104	105290105	Atp2c1	1
chr1	166222861	166222862	Pogk	1		chr1	172024663	172024664	Pea15a	2		chr13	101825499	101825500	Pik3r1	9		chr9	108172575	108172576	Nicn1	2
chr1	166223003	166223004	Pogk	1		chr1	172025154	172025155	Pea15a	8		chr13	108183096	108183097	Smim15	2		chr9	108180317	108180318	Tcta	11
chr1	167053924	167053925	Uck2	2		chr1	172026028	172026029	Pea15a	1		chr13	111562451	111562452	Gpbp1	1		chr9	121541759	121541760	Ss18l2	13
chr1	167158068	167158069	Tmco1	1		chr1	172028101	172028102	Pea15a	1		chr13	111562477	111562478	Gpbp1	4		chr9	121541825	121541826	Ss18l2	6
chr1	167158117	167158118	Tmco1	1		chr1	172334821	172334822	Tagln2	2		chr13	111562565	111562566	Gpbp1	8		chr9	121585758	121585759	Nktr	3
chr1	167158209	167158210	Tmco1	2		chr1	173314451	173314452	Ifi206	1		chr13	114964988	114964989	Mocs2	1		chr9	123350391	123350392	Limd1	1
chr1	167195354	167195355	Aldh9a1	1		chr1	173402472	173402473	Ifi213	1		chr14	3895859	3895860	Ube2e2	4		chrX	5966612	5966613	Nudt11	1
chr1	167195410	167195411	Aldh9a1	3		chr1	173472389	173472390	Ifi209	1		chr14	19862177	19862178	Rtraf	2		chrX	7576312	7576313	Gpkow	1
chr1	167195411	167195412	Aldh9a1	2		chr1	173690213	173690214	Mndal	1		chr14	20550232	20550233	Ppp3cb	1		chrX	12482548	12482549	Atp6ap2	1
chr1	167983169	167983170	Pbx1	1		chr1	176583841	176583842	Cep170	1		chr14	20551146	20551147	Ppp3cb	8		chrX	12482554	12482555	Atp6ap2	1
chr1	169969789	169969790	Uap1	2		chr1	178079780	178079781	Desi2	2		chr14	20599059	20599060	Usp54	1		chrX	20266127	20266128	Rp2	1
chr1	170021327	170021328	Uhmk1	1		chr1	178156205	178156206	Hnrnpu	2		chr14	21498369	21498370	Adk	1		chrX	35869444	35869445	Pgrmc1	4
chr1	171057399	171057400	Fcer1g	105		chr1	178156364	178156365	Hnrnpu	8		chr14	21895367	21895368	Vdac2	1		chrX	35869540	35869541	Pgrmc1	1
chr1	171116405	171116406	Ufc1	1		chr1	178156383	178156384	Hnrnpu	1		chr14	24540800	24540801	Rps24	27		chrX	36454714	36454715	Ndufa1	4
chr1	171116486	171116487	Ufc1	2		chr1	178156388	178156389	Hnrnpu	2		chr14	25666981	25666982	Zmiz1	2		chrX	55838483	55838484	Fhl1	1
chr1	171116504	171116505	Ufc1	2		chr1	178156421	178156422	Hnrnpu	3		chr14	25924916	25924917	Tmem254a	1		chrX	55838500	55838501	Fhl1	2
chr1	171169986	171169987	Nit1	1		chr1	178156933	178156934	Hnrnpu	2		chr14	26377656	26377657	Arf4	21		chrX	73073563	73073564	Mecp2	6
chr1	171170072	171170073	Nit1	1		chr1	178156941	178156942	Hnrnpu	1		chr14	29696719	29696720	Selenok	4		chrX	73073570	73073571	Mecp2	1
chr1	171185635	171185636	Pfdn2	1		chr1	178157797	178157798	Hnrnpu	2		chr14	30721886	30721887	Spcs1	37		chrX	73073574	73073575	Mecp2	3
chr1	171246066	171246067	Usf1	2		chr1	178157803	178157804	Hnrnpu	2		chr14	30721913	30721914	Spcs1	5		chrX	74829986	74829987	Pls3	2
chr1	171532458	171532459	Cd48	1		chr1	178157813	178157814	Hnrnpu	2		chr14	30981784	30981785	Bap1	1		chrX	98892187	98892188	Tmem28	1
chr1	171893691	171893692	Ncstn	1		chr1	178157821	178157822	Hnrnpu	1		chr14	34133220	34133221	Bmpr1a	3		chrX	100255650	100255651	Snx12	1
chr1	171893900	171893901	Ncstn	5		chr1	179508121	179508122	Sccpdh	1		chr14	34133290	34133291	Bmpr1a	8		chrX	100644548	100644549	Taf1	1
chr1	171893901	171893902	Ncstn	9		chr1	179514278	179514279	Sccpdh	1		chr14	34133298	34133299	Bmpr1a	3		chrX	108203793	108203794	Sh3bgrl	1
chr1	171893903	171893904	Ncstn	9		chr1	179514563	179514564	Sccpdh	2		chr14	36842937	36842938	Ghitm	2		chrX	108204773	108204774	Sh3bgrl	1
chr1	171893904	171893905	Ncstn	7		chr1	179788370	179788371	Cdc42bpa	4		chr14	36843017	36843018	Ghitm	50		chrX	150256928	150256929	Fam120c	3
chr1	171893907	171893908	Ncstn	4		chr1	180054671	180054672	Psen2	1		chr14	36843026	36843027	Ghitm	57		chrX	150717715	150717716	Huwe1	3
chr1	171893980	171893981	Ncstn	1		chr1	180428485	180428486	Parp1	2		chr14	36843045	36843046	Ghitm	14		chrX	165170654	165170655	Gpm6b	3
chr1	171949550	171949551	Copa	2		chr1	180630207	180630208	H3f3a	4		chr14	36855613	36855614	Ghitm	1		chrX	165240351	165240352	Rab9	1
chr1	171949606	171949607	Copa	3		chr1	180630240	180630241	H3f3a	2		chr14	45586390	45586391	Psmc6	1		chrX	166129621	166129622	Prps2	2
chr1	171949611	171949612	Copa	3		chr1	180630636	180630637	H3f3a	1		chr14	47016374	47016375	Cnih1	1
chr1	171949613	171949614	Copa	5		chr1	180630703	180630704	H3f3a	2		chr14	47091546	47091547	Cgrrf1	1
chr1	171949618	171949619	Copa	2		chr1	180637746	180637747	H3f3a	1		chr14	47930928	47930929	Ktn1	1
chr1	171949620	171949621	Copa	1		chr1	180695397	180695398	Sde2	1		chr14	47973698	47973699	Ktn1	1
chr1	171949623	171949624	Copa	1		chr1	180735522	180735523	Pycr2	1		chr14	48895529	48895530	Otx2	1
chr1	171949696	171949697	Copa	1		chr1	180765678	180765679	Lefty1	1		chr14	51164783	51164784	Pip4p1	2
chr1	171962704	171962705	Pex19	1		chr1	180765715	180765716	Lefty1	2		chr14	52436290	52436291	Chd8	1
chr1	172022739	172022740	Dcaf8	1		chr1	180765748	180765749	Lefty1	1		chr14	54928002	54928003	1700123O20Rik	1
chr1	172023829	172023830	Dcaf8	1		chr1	180817191	180817192	Ephx1	1		chr14	54928110	54928111	1700123O20Rik	1
chr1	172024570	172024571	Pea15a	1		chr1	180817195	180817196	Ephx1	2		chr14	55125378	55125379	Bcl2l2	3
chr1	172024617	172024618	Pea15a	1		chr1	180983478	180983479	Cnih4	2		chr14	55125396	55125397	Bcl2l2	1
chr1	172024618	172024619	Pea15a	1		chr1	181001243	181001244	Wdr26	1		chr14	55125463	55125464	Bcl2l2	3
chr1	172025054	172025055	Pea15a	1		chr1	181002102	181002103	Wdr26	1		chr14	55125467	55125468	Bcl2l2	8
chr1	172025150	172025151	Pea15a	2		chr1	181002856	181002857	Wdr26	1		chr14	55846823	55846824	Irf9	3
chr1	172025202	172025203	Pea15a	2		chr1	181008880	181008881	Wdr26	1		chr14	56134818	56134819	Sdr39u1	1
chr1	172025213	172025214	Pea15a	1		chr1	181008883	181008884	Wdr26	1		chr14	56134942	56134943	Sdr39u1	1
chr1	172025220	172025221	Pea15a	3		chr1	181643917	181643918	Lbr	1		chr14	56911398	56911399	Mphosph8	4
chr1	172025232	172025233	Pea15a	1		chr1	181731266	181731267	Enah	1		chr14	56911408	56911409	Mphosph8	2
chr1	172025258	172025259	Pea15a	2		chr1	181959098	181959099	Srp9	5		chr14	56911423	56911424	Mphosph8	1
chr1	172025395	172025396	Pea15a	1		chr1	181959170	181959171	Srp9	1		chr14	58064320	58064321	Mrpl57	9
chr1	172100106	172100107	Atp1a2	2		chr1	181959738	181959739	Srp9	2		chr14	59824038	59824039	Cdadc1	1
chr1	172100151	172100152	Atp1a2	1		chr1	181959743	181959744	Srp9	1		chr14	60625368	60625369	Amer2	12
chr1	172100209	172100210	Atp1a2	1		chr1	181959822	181959823	Srp9	1		chr14	61602971	61602972	Kpna3	1
chr1	172100644	172100645	Atp1a2	1		chr1	181959882	181959883	Srp9	1		chr14	63380290	63380291	Ctsb	41
chr1	172147173	172147174	Igsf8	1		chr1	182103872	182103873	Degs1	3		chr14	63380320	63380321	Ctsb	212
chr1	172199567	172199568	Kcnj10	1		chr1	182103881	182103882	Degs1	8		chr14	63380342	63380343	Ctsb	1033
chr1	172201618	172201619	Kcnj10	1		chr1	182144261	182144262	Fbxo28	1		chr14	63380392	63380393	Ctsb	593
chr1	172305698	172305699	Slamf9	8		chr1	182144312	182144313	Fbxo28	1		chr14	65429996	65429997	Fzd3	1
chr1	172334295	172334296	Tagln2	2		chr1	182286325	182286326	Trp53bp2	1		chr14	67040541	67040542	Dpysl2	9
chr1	173289565	173289566	Aim2	1		chr1	182295093	182295094	Capn2	10		chr14	67224855	67224856	Bnip3l	32
chr1	173472385	173472386	Ifi209	3		chr1	182295130	182295131	Capn2	3		chr14	67224973	67224974	Bnip3l	16
chr1	173569177	173569178	Ifi207	2		chr1	183058177	183058178	Brox	1		chr14	67253534	67253535	Ppp2r2a	1
chr1	175431579	175431580	Fh1	1		chr1	183097622	183097623	Aida	3		chr14	67276405	67276406	Ppp2r2a	2
chr1	176561380	176561381	Cep170	2		chr1	183104269	183104270	Aida	2		chr14	73433159	73433160	Rb1	1
chr1	176561482	176561483	Cep170	1		chr1	183104374	183104375	Aida	3		chr14	73599935	73599936	Itm2b	104
chr1	176583841	176583842	Cep170	1		chr1	183107912	183107913	Mia3	1		chr14	73600047	73600048	Itm2b	19
chr1	177278146	177278147	Zbtb18	1		chr1	185089768	185089769	Bpnt1	2		chr14	73602069	73602070	Itm2b	91
chr1	177603191	177603192	Adss	1		chr1	185089849	185089850	Bpnt1	1		chr14	73602074	73602075	Itm2b	67
chr1	178149376	178149377	Hnrnpu	1		chr1	185089873	185089874	Bpnt1	4		chr14	74992397	74992398	Lrch1	1
chr1	178156155	178156156	Hnrnpu	1		chr1	185111061	185111062	Eprs	1		chr14	76084725	76084726	Tpt1	7
chr1	178156416	178156417	Hnrnpu	2		chr1	185160256	185160257	Eprs	1		chr14	76085604	76085605	Tpt1	60
chr1	178158683	178158684	Hnrnpu	1		chr1	188703608	188703609	Kctd3	4		chr14	76744835	76744836	Tsc22d1	1
chr1	178158805	178158806	Hnrnpu	1		chr1	189612819	189612820	Smyd2	2		chr14	79840308	79840309	Sugt1	1
chr1	178158809	178158810	Hnrnpu	2		chr1	189612844	189612845	Smyd2	2		chr14	93252181	93252182	Pcdh9	25
chr1	178159812	178159813	Hnrnpu	1		chr1	189612879	189612880	Smyd2	1		chr14	101681729	101681730	Tbc1d4	1
chr1	179356491	179356492	Tfb2m	1		chr1	189852187	189852188	Prox1	5		chr14	101681746	101681747	Tbc1d4	1
chr1	179514605	179514606	Sccpdh	1		chr1	190505286	190505287	Rps6kc1	1		chr14	103318780	103318781	Fbxl3	4
chr1	179514719	179514720	Sccpdh	1		chr1	190677698	190677699	Angel2	1		chr14	119214265	119214266	Dnajc3	5
chr1	179572695	179572696	Kif28	1		chr1	191039169	191039170	Nenf	1		chr14	119216736	119216737	Dnajc3	3
chr1	179992919	179992920	Coq8a	1		chr1	191086120	191086121	Ppp2r5a	1		chr14	120667144	120667145	Mbnl2	1
chr1	179993073	179993074	Cdc42bpa	1		chr1	191086132	191086133	Ppp2r5a	1		chr14	120668402	120668403	Mbnl2	6
chr1	180054691	180054692	Psen2	2		chr1	191086946	191086947	Ppp2r5a	3		chr14	122396409	122396410	Tm9sf2	4
chr1	180055191	180055192	Psen2	1		chr1	191086948	191086949	Ppp2r5a	1		chr14	122396414	122396415	Tm9sf2	5
chr1	180428287	180428288	Parp1	1		chr1	191087008	191087009	Ppp2r5a	2		chr14	122396809	122396810	Tm9sf2	1
chr1	180630258	180630259	H3f3a	1		chr1	191087019	191087020	Ppp2r5a	1		chr15	4011716	4011717	AW549877	4
chr1	180630713	180630714	H3f3a	5		chr1	191508442	191508443	Lpgat1	2		chr15	6828952	6828953	Rictor	2
chr1	180630717	180630718	H3f3a	3		chr1	191508482	191508483	Lpgat1	11		chr15	9175963	9175964	Lmbrd2	1
chr1	180637746	180637747	H3f3a	3		chr1	191510653	191510654	Lpgat1	5		chr15	12185291	12185292	Zfr	1
chr1	180637755	180637756	H3f3a	1		chr1	191510706	191510707	Lpgat1	2		chr15	12185313	12185314	Zfr	1
chr1	180637762	180637763	H3f3a	1		chr1	191511762	191511763	Lpgat1	1		chr15	25363641	25363642	Basp1	2
chr1	180637767	180637768	H3f3a	1		chr1	191513928	191513929	Lpgat1	2		chr15	25363654	25363655	Basp1	6
chr1	180637787	180637788	H3f3a	1		chr1	191514739	191514740	Lpgat1	3		chr15	25364254	25364255	Basp1	1
chr1	180637815	180637816	H3f3a	1		chr1	191514844	191514845	Lpgat1	3		chr15	27656619	27656620	Otulinl	1
chr1	180765762	180765763	Lefty1	1		chr1	191514950	191514951	Lpgat1	1		chr15	34140869	34140870	Mtdh	1
chr1	180983480	180983481	Cnih4	1		chr1	191516146	191516147	Lpgat1	2		chr15	34442902	34442903	Rpl30	11
chr1	180983485	180983486	Cnih4	1		chr1	191645242	191645243	Slc30a1	1		chr15	36771270	36771271	Ywhaz	8
chr1	180983503	180983504	Cnih4	2		chr1	194800043	194800044	Cr1l	1		chr15	36775743	36775744	Ywhaz	1
chr1	180983511	180983512	Cnih4	3		chr10	4970485	4970486	Syne1	1		chr15	36791038	36791039	Ywhaz	1
chr1	180989756	180989757	Cnih4	1		chr10	7505326	7505327	Pcmt1	3		chr15	38692047	38692048	Atp6v1c1	2
chr1	181004893	181004894	Wdr26	1		chr10	7513786	7513787	Pcmt1	1		chr15	39734255	39734256	Lrp12	3
chr1	181008881	181008882	Wdr26	2		chr10	7643766	7643767	Ginm1	1		chr15	41722632	41722633	Oxr1	1
chr1	181730693	181730694	Enah	1		chr10	7643861	7643862	Ginm1	1		chr15	42289116	42289117	Angpt1	1
chr1	181731478	181731479	Enah	1		chr10	7643948	7643949	Ginm1	1		chr15	43126714	43126715	Eif3e	1
chr1	181959046	181959047	Srp9	1		chr10	7646197	7646198	Ginm1	1		chr15	43390941	43390942	Emc2	2
chr1	181959116	181959117	Srp9	3		chr10	7781663	7781664	Tab2	1		chr15	51826885	51826886	Rad21	2
chr1	181959738	181959739	Srp9	1		chr10	7782212	7782213	Tab2	1		chr15	51841494	51841495	Rad21	1
chr1	181959744	181959745	Srp9	1		chr10	7795242	7795243	Tab2	1		chr15	58654441	58654442	Tmem65	2
chr1	181959817	181959818	Srp9	1		chr10	8599785	8599786	Sash1	2		chr15	75942085	75942086	Puf60	8
chr1	181959846	181959847	Srp9	1		chr10	8599868	8599869	Sash1	3		chr15	78914557	78914558	H1f0	1
chr1	182103616	182103617	Degs1	1		chr10	11090699	11090700	Shprh	1		chr15	78977604	78977605	Eif3l	4
chr1	182104037	182104038	Degs1	1		chr10	11090727	11090728	Shprh	1		chr15	79302350	79302351	Csnk1e	1
chr1	182144341	182144342	Fbxo28	1		chr10	12258189	12258190	Utrn	1		chr15	79412223	79412224	Ddx17	8
chr1	182294977	182294978	Capn2	1		chr10	12601997	12601998	Utrn	2		chr15	79710569	79710570	Cbx6	2
chr1	182295021	182295022	Capn2	2		chr10	12884875	12884876	Sf3b5	1		chr15	81203467	81203468	Slc25a17	5
chr1	182295050	182295051	Capn2	3		chr10	13677666	13677667	Aig1	1		chr15	81249454	81249455	St13	2
chr1	182295093	182295094	Capn2	4		chr10	14025829	14025830	Hivep2	1		chr15	81360382	81360383	Rbx1	1
chr1	182295130	182295131	Capn2	1		chr10	14531244	14531245	Vta1	2		chr15	81799127	81799128	Aco2	6
chr1	183085676	183085677	Aida	1		chr10	17601147	17601148	Cited2	1		chr15	81799223	81799224	Aco2	12
chr1	183095002	183095003	Aida	1		chr10	17601149	17601150	Cited2	1		chr15	81925636	81925637	Snu13	6
chr1	183097562	183097563	Aida	1		chr10	17887085	17887086	Abracl	1		chr15	81925747	81925748	Snu13	1
chr1	183097613	183097614	Aida	1		chr10	18876856	18876857	Tnfaip3	1		chr15	83010392	83010393	Poldip3	1
chr1	183097622	183097623	Aida	5		chr10	18876900	18876901	Tnfaip3	1		chr15	84437706	84437707	Rtl6	1
chr1	183099819	183099820	Aida	1		chr10	18876928	18876929	Tnfaip3	1		chr15	85347386	85347387	Atxn10	2
chr1	183104250	183104251	Aida	2		chr10	18876937	18876938	Tnfaip3	1		chr15	85347406	85347407	Atxn10	2
chr1	184545979	184545980	Mtarc2	1		chr10	20215520	20215521	Bclaf1	1		chr15	92237686	92237687	Cntn1	1
chr1	185019080	185019081	Iars2	1		chr10	20215551	20215552	Bclaf1	1		chr15	93183001	93183002	Yaf2	1
chr1	185088831	185088832	Bpnt1	1		chr10	20218058	20218059	Bclaf1	1		chr15	93285645	93285646	Zcrb1	3
chr1	185088972	185088973	Bpnt1	1		chr10	21871693	21871694	Sgk1	1		chr15	96317924	96317925	Scaf11	6
chr1	185089847	185089848	Bpnt1	1		chr10	21871712	21871713	Sgk1	3		chr15	96469537	96469538	Slc38a1	1
chr1	185111028	185111029	Eprs	1		chr10	21875139	21875140	Sgk1	1		chr15	96474274	96474275	Slc38a1	3
chr1	185111063	185111064	Eprs	1		chr10	21875250	21875251	Sgk1	8		chr15	96474286	96474287	Slc38a1	1
chr1	185139265	185139266	Eprs	1		chr10	21875480	21875481	Sgk1	13		chr15	96474293	96474294	Slc38a1	3
chr1	189850761	189850762	Prox1	1		chr10	21875481	21875482	Sgk1	15		chr15	96474372	96474373	Slc38a1	1
chr1	190678860	190678861	Angel2	1		chr10	21875526	21875527	Sgk1	6		chr15	98416801	98416802	Kansl2	1
chr1	191084263	191084264	Ppp2r5a	1		chr10	21875733	21875734	Sgk1	78		chr15	98436914	98436915	Ccnt1	1
chr1	191086763	191086764	Ppp2r5a	1		chr10	22581327	22581328	Tbpl1	1		chr15	98635761	98635762	Arf3	3
chr1	191087008	191087009	Ppp2r5a	2		chr10	23662710	23662711	Rps12	4		chr15	98829541	98829542	Tuba1b	1
chr1	191508473	191508474	Lpgat1	1		chr10	23662711	23662712	Rps12	2		chr15	98829652	98829653	Tuba1b	2
chr1	191510516	191510517	Lpgat1	1		chr10	24031263	24031264	Stx7	1		chr15	102005411	102005412	Eif4b	9
chr1	191510555	191510556	Lpgat1	1		chr10	24063692	24063693	Stx7	1		chr15	102123699	102123700	Zfp740	1
chr1	191510579	191510580	Lpgat1	3		chr10	24063850	24063851	Stx7	2		chr15	102379225	102379226	Pcbp2	1
chr1	191510690	191510691	Lpgat1	2		chr10	24064451	24064452	Stx7	1		chr15	102407128	102407129	Pcbp2	6
chr1	191510706	191510707	Lpgat1	1		chr10	24064632	24064633	Stx7	1		chr15	103153071	103153072	Hnrnpa1	2
chr1	191510814	191510815	Lpgat1	1		chr10	24064725	24064726	Stx7	1		chr16	4692761	4692762	Ubald1	3
chr1	191511773	191511774	Lpgat1	1		chr10	29075031	29075032	Soga3	4		chr16	4755969	4755970	Mgrn1	4
chr1	191511814	191511815	Lpgat1	1		chr10	29075321	29075322	Soga3	2		chr16	4756095	4756096	Mgrn1	8
chr1	191514844	191514845	Lpgat1	1		chr10	29075351	29075352	Soga3	4		chr16	4758680	4758681	Nudt16l1	2
chr1	194789152	194789153	Cr1l	1		chr10	29103641	29103642	9330159F19Rik	2		chr16	8439178	8439179	Abat	1
chr1	194794697	194794698	Cr1l	1		chr10	29104168	29104169	9330159F19Rik	2		chr16	8439235	8439236	Abat	3
chr10	7506578	7506579	Pcmt1	1		chr10	29221060	29221061	Echdc1	2		chr16	8439336	8439337	Abat	2
chr10	7506613	7506614	Pcmt1	1		chr10	29222507	29222508	Echdc1	1		chr16	10238449	10238450	Tvp23a	2
chr10	7506619	7506620	Pcmt1	1		chr10	30479493	30479494	Gm20300	2		chr16	10892647	10892648	Snn	1
chr10	7506621	7506622	Pcmt1	1		chr10	33795321	33795322	Zup1	1		chr16	11012412	11012413	Rsl1d1	1
chr10	7506682	7506683	Pcmt1	1		chr10	33878519	33878520	Rwdd1	3		chr16	11021031	11021032	Rsl1d1	3
chr10	7506696	7506697	Pcmt1	3		chr10	33885046	33885047	Rwdd1	1		chr16	13653043	13653044	Ntan1	2
chr10	7513869	7513870	Pcmt1	1		chr10	33895374	33895375	Rwdd1	1		chr16	16862789	16862790	Mapk1	3
chr10	7591617	7591618	Lats1	1		chr10	35586000	35586001	Amd2	1		chr16	16864950	16864951	Mapk1	1
chr10	7643891	7643892	Ginm1	2		chr10	37009520	37009521	Marcks	1		chr16	17343945	17343946	Lztr1	1
chr10	7781621	7781622	Tab2	1		chr10	37009666	37009667	Marcks	1		chr16	18653858	18653859	Ufd1	1
chr10	7781691	7781692	Tab2	1		chr10	37010123	37010124	Marcks	1		chr16	19942582	19942583	Klhl24	3
chr10	7781696	7781697	Tab2	1		chr10	37011029	37011030	Marcks	4		chr16	20362480	20362481	Ap2m1	75
chr10	7781781	7781782	Tab2	1		chr10	37011552	37011553	Marcks	2		chr16	20362481	20362482	Ap2m1	73
chr10	7782209	7782210	Tab2	1		chr10	37011733	37011734	Marcks	4		chr16	20437389	20437390	Eef1akmt4	1
chr10	7795012	7795013	Tab2	1		chr10	37011906	37011907	Marcks	7		chr16	20511401	20511402	Eif4g1	1
chr10	7795681	7795682	Tab2	1		chr10	37014767	37014768	Marcks	1		chr16	22690651	22690652	Dnajb11	1
chr10	8598221	8598222	Sash1	1		chr10	39440013	39440014	Fyn	3		chr16	23287381	23287382	Masp1	1
chr10	8598269	8598270	Sash1	1		chr10	39440098	39440099	Fyn	9		chr16	23783955	23783956	Bcl6	2
chr10	13005553	13005554	Plagl1	1		chr10	40099914	40099915	Rpf2	1		chr16	31072161	31072162	Ppp1r2	3
chr10	13007137	13007138	Plagl1	1		chr10	40124031	40124032	Gtf3c6	1		chr16	31766806	31766807	0610012G03Rik	1
chr10	13007269	13007270	Plagl1	1		chr10	40166395	40166396	Amd1	3		chr16	31766865	31766866	0610012G03Rik	1
chr10	13007306	13007307	Plagl1	1		chr10	40356984	40356985	Cdk19	1		chr16	31840692	31840693	Pak2	1
chr10	13390989	13390990	Fuca2	2		chr10	40357824	40357825	Cdk19	1		chr16	32876869	32876870	Rpl35a	35
chr10	13391182	13391183	Fuca2	1		chr10	41341327	41341328	Zbtb24	1		chr16	34926796	34926797	Hacd2	11
chr10	13391347	13391348	Fuca2	1		chr10	41405109	41405110	Cd164	2		chr16	37704409	37704410	Lrrc58	4
chr10	13528730	13528731	Aig1	1		chr10	41405802	41405803	Cd164	1		chr16	37704887	37704888	Lrrc58	1
chr10	13677599	13677600	Aig1	1		chr10	41406789	41406790	Cd164	3		chr16	37704953	37704954	Lrrc58	2
chr10	17601147	17601148	Cited2	8		chr10	42058011	42058012	Foxo3	4		chr16	37709103	37709104	Lrrc58	5
chr10	18000687	18000688	Reps1	1		chr10	42410998	42410999	Snx3	2		chr16	38040514	38040515	Gsk3b	1
chr10	18876736	18876737	Tnfaip3	1		chr10	42411001	42411002	Snx3	4		chr16	38065515	38065516	Gsk3b	2
chr10	19479569	19479570	Ifngr1	7		chr10	42411020	42411021	Snx3	2		chr16	38345605	38345606	Poglut1	1
chr10	20155858	20155859	Map7	1		chr10	42411096	42411097	Snx3	12		chr16	43439175	43439176	Zbtb20	11
chr10	20215520	20215521	Bclaf1	1		chr10	43401372	43401373	Mtres1	1		chr16	43439232	43439233	Zbtb20	3
chr10	21244499	21244500	Hbs1l	1		chr10	48977000	48977001	Grik2	2		chr16	43907487	43907488	Atp6v1a	1
chr10	21244500	21244501	Hbs1l	1		chr10	52214731	52214732	Gopc	1		chr16	43907532	43907533	Atp6v1a	1
chr10	21244592	21244593	Hbs1l	1		chr10	52225231	52225232	Gopc	1		chr16	43907577	43907578	Atp6v1a	3
chr10	21875480	21875481	Sgk1	3		chr10	52314353	52314354	Nus1	1		chr16	44977897	44977898	Slc35a5	3
chr10	21875481	21875482	Sgk1	3		chr10	52315117	52315118	Nus1	1		chr16	48745100	48745101	Dzip3	1
chr10	21875489	21875490	Sgk1	2		chr10	53483884	53483885	Asf1a	1		chr16	49731370	49731371	Cd47	2
chr10	21875493	21875494	Sgk1	2		chr10	53781104	53781105	Man1a	2		chr16	50044690	50044691	Bbx	2
chr10	21875585	21875586	Sgk1	4		chr10	53781114	53781115	Man1a	2		chr16	55836056	55836057	Pcnp	2
chr10	21875622	21875623	Sgk1	4		chr10	53781133	53781134	Man1a	1		chr16	56010192	56010193	Senp7	1
chr10	21875671	21875672	Sgk1	7		chr10	53781163	53781164	Man1a	3		chr16	56973119	56973120	Tomm70a	2
chr10	21875733	21875734	Sgk1	30		chr10	53781224	53781225	Man1a	1		chr16	58553873	58553874	Cldnd1	6
chr10	23661858	23661859	Rps12	106		chr10	53782246	53782247	Man1a	1		chr16	58554246	58554247	Cldnd1	6
chr10	23661868	23661869	Rps12	73		chr10	53782359	53782360	Man1a	2		chr16	65336184	65336185	Chmp2b	1
chr10	23661871	23661872	Rps12	35		chr10	53783477	53783478	Man1a	1		chr16	75552247	75552248	Hspa13	1
chr10	23662710	23662711	Rps12	30		chr10	57392131	57392132	Serinc1	2		chr16	84751442	84751443	App	80
chr10	23662711	23662712	Rps12	35		chr10	57392193	57392194	Serinc1	1		chr16	84751755	84751756	App	218
chr10	24064451	24064452	Stx7	1		chr10	57392198	57392199	Serinc1	6		chr16	84751761	84751762	App	239
chr10	24064464	24064465	Stx7	1		chr10	57392509	57392510	Serinc1	2		chr16	84751765	84751766	App	25
chr10	24064490	24064491	Stx7	1		chr10	57392525	57392526	Serinc1	2		chr16	84751773	84751774	App	22
chr10	24064554	24064555	Stx7	3		chr10	57392960	57392961	Serinc1	11		chr16	84752067	84752068	App	9
chr10	24064596	24064597	Stx7	2		chr10	57393308	57393309	Serinc1	1		chr16	84752091	84752092	App	19
chr10	24064599	24064600	Stx7	1		chr10	57393328	57393329	Serinc1	8		chr16	87280361	87280362	Cct8	1
chr10	24064774	24064775	Stx7	2		chr10	57399234	57399235	Serinc1	2		chr16	87280475	87280476	Cct8	3
chr10	25319683	25319684	Epb41l2	1		chr10	57399241	57399242	Serinc1	2		chr16	87280478	87280479	Cct8	1
chr10	25398449	25398450	Epb41l2	1		chr10	57400485	57400486	Serinc1	5		chr16	90734133	90734134	Synj1	1
chr10	29103513	29103514	9330159F19Rik	1		chr10	57687717	57687718	Smpdl3a	1		chr16	91456565	91456566	Son	1
chr10	29104119	29104120	9330159F19Rik	1		chr10	58114645	58114646	Gcc2	1		chr16	92107748	92107749	Smim11	1
chr10	29222250	29222251	Echdc1	1		chr10	58141279	58141280	Gcc2	1		chr16	94240139	94240140	Ttc3	1
chr10	29222342	29222343	Echdc1	1		chr10	58254236	58254237	Lims1	3		chr17	6188560	6188561	Tulp4	2
chr10	29222473	29222474	Rnf146	1		chr10	58260477	58260478	Lims1	2		chr17	6188696	6188697	Tulp4	6
chr10	29222486	29222487	Rnf146	1		chr10	59935689	59935690	Ascc1	1		chr17	6188736	6188737	Tulp4	11
chr10	30521876	30521877	Ncoa7	3		chr10	60135709	60135710	Psap	1		chr17	8546015	8546016	Sft2d1	2
chr10	30522891	30522892	Ncoa7	1		chr10	60137974	60137975	Psap	1		chr17	13143386	13143387	Tcp1	1
chr10	30678857	30678858	Ncoa7	2		chr10	60138013	60138014	Psap	2		chr17	13143395	13143396	Acat3	1
chr10	30678860	30678861	Ncoa7	1		chr10	60138016	60138017	Psap	3		chr17	17565751	17565752	Oaz1-ps	2
chr10	33877160	33877161	Rwdd1	1		chr10	60138078	60138079	Psap	5		chr17	24035152	24035153	Srrm2	6
chr10	33878524	33878525	Rwdd1	4		chr10	60138141	60138142	Psap	42		chr17	24036410	24036411	Srrm2	2
chr10	33878526	33878527	Rwdd1	1		chr10	60138171	60138172	Psap	38		chr17	24292955	24292956	Pdpk1	2
chr10	33895375	33895376	Rwdd1	1		chr10	60549952	60549953	Slc29a3	1		chr17	24382993	24382994	Atp6v0c	1
chr10	34002516	34002517	Calhm6	1		chr10	60934631	60934632	Sgpl1	1		chr17	24747389	24747390	Rab26os	1
chr10	34159935	34159936	Tspyl1	1		chr10	60934752	60934753	Sgpl1	2		chr17	24904402	24904403	Syngr3	1
chr10	34159938	34159939	Tspyl1	1		chr10	62023196	62023197	Tspan15	6		chr17	25318278	25318279	Ift140	1
chr10	34160024	34160025	Tspyl1	1		chr10	62291333	62291334	Vps26a	1		chr17	26095992	26095993	Mettl26	1
chr10	34176935	34176936	Tspyl4	1		chr10	62291411	62291412	Vps26a	2		chr17	28070687	28070688	Snrpc	3
chr10	34176981	34176982	Tspyl4	1		chr10	62291724	62291725	Vps26a	1		chr17	30428884	30428885	Zfand3	4
chr10	34177007	34177008	Tspyl4	1		chr10	62291761	62291762	Vps26a	1		chr17	32432533	32432534	Brd4	2
chr10	34177009	34177010	Tspyl4	1		chr10	62291854	62291855	Vps26a	1		chr17	32524399	32524400	Akap8	1
chr10	34177034	34177035	Tspyl4	1		chr10	62292401	62292402	Vps26a	1		chr17	33458860	33458861	Zfp955a	1
chr10	34177096	34177097	Tspyl4	2		chr10	62330387	62330388	Srgn	1		chr17	33910675	33910676	Marchf2	1
chr10	34177139	34177140	Tspyl4	2		chr10	62330441	62330442	Srgn	2		chr17	34043452	34043453	Rps28	5
chr10	34177194	34177195	Tspyl4	2		chr10	62330485	62330486	Srgn	3		chr17	34185949	34185950	Vps52	1
chr10	37010218	37010219	Marcks	1		chr10	62330620	62330621	Srgn	2		chr17	34331180	34331181	Brd2	14
chr10	39440098	39440099	Fyn	1		chr10	62330622	62330623	Srgn	1		chr17	34820191	34820192	Rnf5	1
chr10	39440203	39440204	Fyn	1		chr10	62452037	62452038	Ddx50	2		chr17	34851899	34851900	Prrt1	1
chr10	40124030	40124031	Gtf3c6	1		chr10	62851385	62851386	Hnrnph3	2		chr17	35321901	35321902	Abhd16a	5
chr10	40166234	40166235	Amd1	1		chr10	62851430	62851431	Hnrnph3	2		chr17	35486000	35486001	H2-D1	243
chr10	40355993	40355994	Cdk19	1		chr10	62851484	62851485	Rufy2	1		chr17	36145443	36145444	Tubb5	1
chr10	40359742	40359743	Cdk19	1		chr10	62851585	62851586	Rufy2	1		chr17	37384943	37384944	Gabbr1	1
chr10	40814403	40814404	Wasf1	1		chr10	62851588	62851589	Rufy2	1		chr17	40157752	40157753	Rn45s	82
chr10	41406762	41406763	Cd164	2		chr10	62851590	62851591	Rufy2	1		chr17	40158665	40158666	Rn45s	1
chr10	41406768	41406769	Cd164	4		chr10	63153187	63153188	Herc4	1		chr17	43399798	43399799	Tnfrsf21	1
chr10	41406776	41406777	Cd164	1		chr10	66845085	66845086	Reep3	1		chr17	44348228	44348229	Rcan2	5
chr10	41406783	41406784	Cd164	14		chr10	66845253	66845254	Reep3	1		chr17	44348846	44348847	Rcan2	1
chr10	41406979	41406980	Cd164	6		chr10	66845318	66845319	Reep3	8		chr17	44397163	44397164	Enpp5	3
chr10	41595086	41595087	Cep57l1	1		chr10	66845321	66845322	Reep3	1		chr17	44409775	44409776	Enpp4	6
chr10	42057870	42057871	Foxo3	1		chr10	66846053	66846054	Reep3	5		chr17	45878984	45878985	Hsp90ab1	34
chr10	42058011	42058012	Foxo3	3		chr10	66846063	66846064	Reep3	11		chr17	45878991	45878992	Hsp90ab1	7
chr10	42410954	42410955	Snx3	1		chr10	66846069	66846070	Reep3	2		chr17	46328423	46328424	Vegfa	4
chr10	42410981	42410982	Snx3	1		chr10	66846108	66846109	Reep3	1		chr17	46482427	46482428	Polh	1
chr10	42411096	42411097	Snx3	12		chr10	66846115	66846116	Reep3	1		chr17	46857930	46857931	Srf	1
chr10	42411111	42411112	Snx3	8		chr10	66846159	66846160	Reep3	3		chr17	47935092	47935093	Med20	1
chr10	42411112	42411113	Snx3	5		chr10	66846362	66846363	Reep3	1		chr17	57328254	57328255	Khsrp	1
chr10	42411113	42411114	Snx3	3		chr10	66847488	66847489	Reep3	11		chr17	57387282	57387283	Tubb4a	22
chr10	42411206	42411207	Snx3	4		chr10	66847515	66847516	Reep3	5		chr17	57387368	57387369	Tubb4a	101
chr10	42411246	42411247	Snx3	1		chr10	66847521	66847522	Reep3	4		chr17	66155493	66155494	Ralbp1	1
chr10	42578210	42578211	Ostm1	1		chr10	66847554	66847555	Reep3	4		chr17	66155780	66155781	Ralbp1	3
chr10	42682637	42682638	Sec63	1		chr10	66847579	66847580	Reep3	2		chr17	66293854	66293855	Ankrd12	1
chr10	42688685	42688686	Sec63	1		chr10	66848795	66848796	Reep3	6		chr17	69595941	69595942	Epb41l3	3
chr10	42692424	42692425	Sec63	1		chr10	66848854	66848855	Reep3	1		chr17	69596145	69596146	Epb41l3	4
chr10	43826813	43826814	Crybg1	1		chr10	66848883	66848884	Reep3	1		chr17	71281128	71281129	Myl12b	6
chr10	48977043	48977044	Grik2	1		chr10	66848893	66848894	Reep3	2		chr17	71281204	71281205	Myl12b	13
chr10	52214732	52214733	Gopc	1		chr10	67091851	67091852	Jmjd1c	1		chr17	71959855	71959856	Wdr43	1
chr10	52313062	52313063	Nus1	1		chr10	67954169	67954170	Arid5b	1		chr17	74138957	74138958	Ehd3	5
chr10	52313140	52313141	Nus1	1		chr10	67970853	67970854	Arid5b	2		chr17	80604778	80604779	Morn2	1
chr10	52987452	52987453	Slc35f1	1		chr10	69860967	69860968	Ank3	1		chr17	80705112	80705113	Sos1	2
chr10	53484043	53484044	Asf1a	1		chr10	70028867	70028868	Ccdc6	1		chr17	81308969	81308970	Tmem178	1
chr10	53781163	53781164	Man1a	1		chr10	71072859	71072860	Tfam	1		chr17	83809525	83809526	Cox7a2l	1
chr10	53782363	53782364	Man1a	1		chr10	71091118	71091119	Ube2d1	2		chr17	85321905	85321906	Ppm1b	1
chr10	53782780	53782781	Man1a	1		chr10	71091123	71091124	Ube2d1	20		chr17	87343077	87343078	Cript	1
chr10	53783293	53783294	Man1a	1		chr10	71166721	71166722	Cisd1	1		chr17	87444792	87444793	Socs5	2
chr10	53783419	53783420	Man1a	2		chr10	72510445	72510446	Zwint	1		chr17	87740974	87740975	Calm2	3
chr10	53783492	53783493	Man1a	1		chr10	72510652	72510653	Zwint	3		chr17	90344409	90344410	Nrxn1	1
chr10	53783495	53783496	Man1a	3		chr10	72510666	72510667	Zwint	4		chr18	6765305	6765306	Rab18	2
chr10	53783501	53783502	Man1a	1		chr10	72510709	72510710	Zwint	3		chr18	9314254	9314255	Ccny	1
chr10	53783571	53783572	Man1a	1		chr10	75353904	75353905	Snrpd3	3		chr18	9993840	9993841	Usp14	1
chr10	57392281	57392282	Serinc1	1		chr10	75353910	75353911	Snrpd3	1		chr18	12323121	12323122	Npc1	7
chr10	57392743	57392744	Serinc1	1		chr10	75355163	75355164	Snrpd3	1		chr18	12323296	12323297	Npc1	20
chr10	57392754	57392755	Serinc1	2		chr10	75607132	75607133	Ddt	1		chr18	14759220	14759221	Ss18	1
chr10	57392933	57392934	Serinc1	1		chr10	75773458	75773459	Chchd10	3		chr18	16722329	16722330	Cdh2	2
chr10	57392960	57392961	Serinc1	1		chr10	75773524	75773525	Chchd10	9		chr18	23792234	23792235	Dtna	1
chr10	57393094	57393095	Serinc1	1		chr10	76389537	76389538	Lss	1		chr18	24026669	24026670	Mapre2	1
chr10	57393206	57393207	Serinc1	1		chr10	77401213	77401214	Itgb2	2		chr18	24418807	24418808	Galnt1	2
chr10	57401477	57401478	Serinc1	1		chr10	77401259	77401260	Itgb2	1		chr18	24619083	24619084	Rprd1a	2
chr10	57401484	57401485	Serinc1	1		chr10	77401291	77401292	Itgb2	1		chr18	24619164	24619165	Rprd1a	3
chr10	57403822	57403823	Serinc1	1		chr10	77401358	77401359	Itgb2	3		chr18	31571036	31571037	Syt4	1
chr10	58254236	58254237	Lims1	3		chr10	77401379	77401380	Itgb2	1		chr18	32403088	32403089	Ercc3	3
chr10	58260227	58260228	Lims1	1		chr10	77401409	77401410	Itgb2	1		chr18	32568331	32568332	Bin1	9
chr10	58315760	58315761	Ranbp2	1		chr10	77452945	77452946	Sumo3	2		chr18	33930155	33930156	Epb41l4a	1
chr10	58329800	58329801	Ranbp2	1		chr10	77453108	77453109	Sumo3	2		chr18	34469234	34469235	Srp19	3
chr10	59733652	59733653	Dnajb12	2		chr10	77745429	77745430	Trpm2	1		chr18	34469339	34469340	Srp19	3
chr10	59823866	59823867	Anapc16	1		chr10	78109932	78109933	Agpat3	1		chr18	34469505	34469506	Srp19	3
chr10	59823871	59823872	Anapc16	1		chr10	78236425	78236426	Rrp1	1		chr18	35705438	35705439	Matr3	1
chr10	59935659	59935660	Ascc1	1		chr10	78263196	78263197	Cstb	1		chr18	35724158	35724159	Matr3	17
chr10	59935695	59935696	Ascc1	1		chr10	78263239	78263240	Cstb	39		chr18	35939305	35939306	Ube2d2a	8
chr10	60136585	60136586	Psap	3		chr10	78420118	78420119	Ilvbl	6		chr18	36421343	36421344	Pura	9
chr10	60138010	60138011	Psap	11		chr10	78420143	78420144	Ilvbl	2		chr18	36421356	36421357	Pura	15
chr10	60138016	60138017	Psap	4		chr10	79746092	79746093	R3hdm4	1		chr18	36421366	36421367	Pura	37
chr10	60138017	60138018	Psap	13		chr10	79867179	79867180	Arhgap45	1		chr18	36421432	36421433	Pura	50
chr10	60138055	60138056	Psap	4		chr10	79871825	79871826	Polr2e	1		chr18	36421439	36421440	Pura	14
chr10	60138068	60138069	Psap	21		chr10	80129491	80129492	Rps15	1		chr18	36421483	36421484	Pura	12
chr10	60138073	60138074	Psap	18		chr10	80245627	80245628	Tcf3	1		chr18	36422704	36422705	Pura	1
chr10	60138078	60138079	Psap	28		chr10	80543051	80543052	Ap3d1	1		chr18	36775979	36775980	Ankhd1	1
chr10	60138104	60138105	Psap	4		chr10	80664948	80664949	Oaz1	15		chr18	36800446	36800447	Sra1	4
chr10	60138126	60138127	Psap	3		chr10	80864532	80864533	Slc39a3	3		chr18	36931001	36931002	Zmat2	1
chr10	60138134	60138135	Psap	9		chr10	80879989	80879990	Sgta	1		chr18	37974715	37974716	Gm37013	3
chr10	60138141	60138142	Psap	84		chr10	80985065	80985066	Zbtb7a	3		chr18	37974719	37974720	Gm37013	3
chr10	60138145	60138146	Psap	93		chr10	80985077	80985078	Zbtb7a	1		chr18	38070166	38070167	Hdac3	2
chr10	60548891	60548892	Slc29a3	1		chr10	81018039	81018040	Eef2	2		chr18	38450600	38450601	Rnf14	6
chr10	60549989	60549990	Slc29a3	1		chr10	81018203	81018204	Eef2	3		chr18	38450787	38450788	Rnf14	2
chr10	60934631	60934632	Sgpl1	22		chr10	81018284	81018285	Eef2	1		chr18	38597962	38597963	Ndfip1	2
chr10	61268532	61268533	Eif4ebp2	1		chr10	81109027	81109028	Apba3	3		chr18	40338209	40338210	Yipf5	1
chr10	61520960	61520961	Sar1a	1		chr10	81232239	81232240	Nfic	6		chr18	42708346	42708347	Tcerg1	1
chr10	62023297	62023298	Tspan15	1		chr10	81235040	81235041	Nfic	1		chr18	46720725	46720726	Tmed7	1
chr10	62023355	62023356	Tspan15	2		chr10	81235046	81235047	Nfic	6		chr18	47380629	47380630	Sema6a	2
chr10	62023378	62023379	Tspan15	1		chr10	81401802	81401803	Tle5	1		chr18	54088291	54088292	Csnk1g3	1
chr10	62104914	62104915	Hk1	1		chr10	81401861	81401862	Tle5	6		chr18	60690406	60690407	Dctn4	1
chr10	62291280	62291281	Vps26a	1		chr10	81401889	81401890	Tle5	4		chr18	61722955	61722956	Csnk1a1	1
chr10	62291344	62291345	Vps26a	1		chr10	81402018	81402019	Tle5	1		chr18	63130136	63130137	Napg	1
chr10	62291724	62291725	Vps26a	1		chr10	84207485	84207486	Nuak1	1		chr18	64122633	64122634	Wdr7	1
chr10	62291879	62291880	Vps26a	1		chr10	84207487	84207488	Nuak1	3		chr18	67613418	67613419	Prelid3a	1
chr10	62304165	62304166	Vps26a	1		chr10	84207520	84207521	Nuak1	1		chr18	69816473	69816474	Tcf4	1
chr10	62434431	62434432	Ddx21	1		chr10	84363214	84363215	Ckap4	1		chr18	69817729	69817730	Tcf4	1
chr10	62437922	62437923	Ddx21	1		chr10	84449923	84449924	Tcp11l2	1		chr18	69817747	69817748	Tcf4	4
chr10	62451999	62452000	Ddx50	1		chr10	84953204	84953205	Tmem263	2		chr18	69820780	69820781	Tcf4	1
chr10	62452037	62452038	Ddx50	1		chr10	85883929	85883930	Fbxo7	1		chr18	73768112	73768113	Smad4	1
chr10	62452120	62452121	Ddx50	1		chr10	86526855	86526856	Hsp90b1	101		chr18	75134788	75134789	Rpl17	29
chr10	62851229	62851230	Hnrnph3	1		chr10	86526861	86526862	Hsp90b1	20		chr18	75142630	75142631	BC031181	1
chr10	62851321	62851322	Hnrnph3	1		chr10	86526877	86526878	Hsp90b1	26		chr18	77017910	77017911	Ier3ip1	4
chr10	62851338	62851339	Hnrnph3	1		chr10	86526944	86526945	Hsp90b1	12		chr18	77027275	77027276	Ier3ip1	2
chr10	62851374	62851375	Hnrnph3	1		chr10	86527551	86527552	Hsp90b1	4		chr18	77058963	77058964	Hdhd2	19
chr10	62851415	62851416	Hnrnph3	1		chr10	86527579	86527580	Hsp90b1	1		chr18	77059042	77059043	Hdhd2	6
chr10	62851419	62851420	Hnrnph3	1		chr10	86528314	86528315	Hsp90b1	2		chr18	77870236	77870237	Atp5a1	4
chr10	62851486	62851487	Rufy2	1		chr10	86531384	86531385	Hsp90b1	23		chr19	3435070	3435071	Cpt1a	1
chr10	62851585	62851586	Rufy2	2		chr10	86531385	86531386	Hsp90b1	18		chr19	3435580	3435581	Cpt1a	2
chr10	63153289	63153290	Herc4	1		chr10	86531386	86531387	Hsp90b1	12		chr19	4815662	4815663	Rbm4b	1
chr10	63157884	63157885	Sirt1	1		chr10	86531552	86531553	Hsp90b1	8		chr19	4835420	4835421	Gm21992	3
chr10	63244274	63244275	Dnajc12	1		chr10	86531813	86531814	Hsp90b1	1		chr19	5090806	5090807	B4gat1	2
chr10	66844996	66844997	Reep3	1		chr10	86537712	86537713	Hsp90b1	1		chr19	5324133	5324134	Sf3b2	3
chr10	66845318	66845319	Reep3	2		chr10	86537743	86537744	Hsp90b1	1		chr19	5324221	5324222	Sf3b2	2
chr10	66846052	66846053	Reep3	2		chr10	86537791	86537792	Hsp90b1	1		chr19	5698086	5698087	Rela	5
chr10	66846053	66846054	Reep3	1		chr10	86540247	86540248	Hsp90b1	2		chr19	5808343	5808344	Ltbp3	6
chr10	66846069	66846070	Reep3	2		chr10	87749648	87749649	Igf1	1		chr19	5808351	5808352	Ltbp3	1
chr10	66846134	66846135	Reep3	1		chr10	88081813	88081814	Washc3	1		chr19	5847015	5847016	Malat1	6
chr10	66847383	66847384	Reep3	1		chr10	88282345	88282346	Gnptab	1		chr19	5849476	5849477	Malat1	16
chr10	66847515	66847516	Reep3	1		chr10	88282362	88282363	Gnptab	1		chr19	5850819	5850820	Malat1	4
chr10	66847554	66847555	Reep3	4		chr10	88311265	88311266	Chpt1	1		chr19	5851637	5851638	Malat1	2
chr10	66847570	66847571	Reep3	1		chr10	89474837	89474838	Scyl2	1		chr19	5852198	5852199	Malat1	33
chr10	66847579	66847580	Reep3	1		chr10	89475819	89475820	Scyl2	1		chr19	5892569	5892570	Neat1	54
chr10	66847655	66847656	Reep3	1		chr10	89548155	89548156	Actr6	1		chr19	6998216	6998217	Stip1	10
chr10	66847838	66847839	Reep3	2		chr10	90952734	90952735	Slc25a3	1		chr19	7403408	7403409	Rtn3	21
chr10	66848646	66848647	Reep3	1		chr10	90952804	90952805	Slc25a3	2		chr19	9961977	9961978	Fth1	48
chr10	66848718	66848719	Reep3	2		chr10	90952872	90952873	Slc25a3	3		chr19	10524554	10524555	Cpsf7	1
chr10	66848795	66848796	Reep3	1		chr10	90952875	90952876	Slc25a3	5		chr19	12756349	12756350	Zfp91	1
chr10	66848811	66848812	Reep3	1		chr10	90983763	90983764	Tmpo	1		chr19	16363093	16363094	Gnaq	1
chr10	66848842	66848843	Reep3	3		chr10	90984773	90984774	Tmpo	1		chr19	16364503	16364504	Gnaq	1
chr10	66848848	66848849	Reep3	1		chr10	90984829	90984830	Tmpo	1		chr19	16365349	16365350	Gnaq	1
chr10	66848851	66848852	Reep3	1		chr10	93076774	93076775	Cdk17	1		chr19	21259041	21259042	Zfand5	13
chr10	66848854	66848855	Reep3	2		chr10	93316607	93316608	Lta4h	1		chr19	23142778	23142779	Klf9	7
chr10	67377880	67377881	Egr2	1		chr10	93419924	93419925	Snrpf	1		chr19	23143667	23143668	Klf9	1
chr10	67382101	67382102	Ado	1		chr10	93423884	93423885	Snrpf	2		chr19	23144829	23144830	Klf9	2
chr10	67382164	67382165	Ado	1		chr10	93696986	93696987	Metap2	3		chr19	24453599	24453600	Fam122a	3
chr10	67931795	67931796	Arid5b	1		chr10	93697026	93697027	Metap2	3		chr19	24453813	24453814	Fam122a	1
chr10	67954110	67954111	Arid5b	1		chr10	93697070	93697071	Metap2	1		chr19	29587640	29587641	Ermp1	2
chr10	69859863	69859864	Ank3	1		chr10	93697090	93697091	Metap2	1		chr19	29731295	29731296	9930021J03Rik	1
chr10	69859890	69859891	Ank3	1		chr10	93704783	93704784	Metap2	1		chr19	32795446	32795447	Pten	7
chr10	69859913	69859914	Ank3	1		chr10	94056588	94056589	Ndufa12	8		chr19	32795448	32795449	Pten	12
chr10	69859972	69859973	Ank3	1		chr10	94056589	94056590	Ndufa12	17		chr19	32797328	32797329	Pten	2
chr10	69859984	69859985	Ank3	1		chr10	94056592	94056593	Ndufa12	7		chr19	34565462	34565463	Ifit3	1
chr10	69860103	69860104	Ank3	1		chr10	94424202	94424203	Tmcc3	1		chr19	37199171	37199172	Marchf5	2
chr10	69860192	69860193	Ank3	1		chr10	94424249	94424250	Tmcc3	1		chr19	41200478	41200479	Tm9sf3	2
chr10	69860227	69860228	Ank3	1		chr10	94426189	94426190	Tmcc3	5		chr19	41244675	41244676	Tm9sf3	10
chr10	69860370	69860371	Ank3	2		chr10	94426193	94426194	Tmcc3	2		chr19	42271587	42271588	Crtac1	1
chr10	69860411	69860412	Ank3	2		chr10	95378772	95378773	Ube2n	4		chr19	43488398	43488399	Got1	3
chr10	69860988	69860989	Ank3	1		chr10	95378882	95378883	Ube2n	1		chr19	44293951	44293952	Scd2	4
chr10	69861083	69861084	Ank3	1		chr10	95384133	95384134	Nudt4	1		chr19	44295127	44295128	Scd2	40
chr10	69861149	69861150	Ank3	1		chr10	95385079	95385080	Nudt4	1		chr19	46365316	46365317	Actr1a	2
chr10	69862935	69862936	Ank3	1		chr10	95385215	95385216	Nudt4	2		chr19	47721321	47721322	Sfr1	1
chr10	69863060	69863061	Ank3	2		chr10	95826152	95826153	Eea1	1		chr19	47723515	47723516	Sfr1	2
chr10	69863090	69863091	Ank3	1		chr10	96454814	96454815	Btg1	1		chr19	50139641	50139642	Sorcs1	2
chr10	69863139	69863140	Ank3	1		chr10	98822913	98822914	Atp2b1	1		chr19	53235291	53235292	Add3	47
chr10	70028761	70028762	Ccdc6	1		chr10	98859369	98859370	Atp2b1	3		chr19	58226325	58226326	Gfra1	1
chr10	71091068	71091069	Ube2d1	1		chr10	98859503	98859504	Atp2b1	3		chr19	58226333	58226334	Gfra1	2
chr10	71091294	71091295	Ube2d1	1		chr10	98860317	98860318	Atp2b1	1		chr19	58226482	58226483	Gfra1	1
chr10	71095604	71095605	Ube2d1	1		chr10	110779722	110779723	Zdhhc17	1		chr19	58962480	58962481	Shtn1	1
chr10	72510452	72510453	Zwint	2		chr10	111132914	111132915	Osbpl8	1		chr19	60749898	60749899	Eif3a	1
chr10	72510666	72510667	Zwint	2		chr10	111328722	111328723	Nap1l1	3		chr19	61105392	61105393	Zfp950	1
chr10	74889731	74889732	Rab36	1		chr10	112761401	112761402	Atxn7l3b	3		chr19	61213044	61213045	Csf2ra	12
chr10	75148083	75148084	Specc1l	1		chr10	112761515	112761516	Atxn7l3b	5		chr2	3228489	3228490	Fam171a1	3
chr10	75353898	75353899	Snrpd3	2		chr10	112762348	112762349	Atxn7l3b	3		chr2	6060680	6060681	Upf2	1
chr10	75353904	75353905	Snrpd3	1		chr10	112762454	112762455	Atxn7l3b	7		chr2	18848166	18848167	Pip4k2a	1
chr10	75353910	75353911	Snrpd3	1		chr10	112762495	112762496	Atxn7l3b	2		chr2	18848984	18848985	Pip4k2a	124
chr10	75353914	75353915	Snrpd3	1		chr10	112763132	112763133	Atxn7l3b	1		chr2	20974852	20974853	Gm13375	3
chr10	75355149	75355150	Snrpd3	3		chr10	115034698	115034699	Tbc1d15	1		chr2	22831841	22831842	Abi1	1
chr10	75355184	75355185	Snrpd3	1		chr10	115125825	115125826	Rab21	1		chr2	23002687	23002688	Acbd5	1
chr10	75695316	75695317	Mif	1		chr10	115125968	115125969	Rab21	2		chr2	25945622	25945623	Nacc2	3
chr10	75773524	75773525	Chchd10	8		chr10	115125973	115125974	Rab21	3		chr2	26795584	26795585	Med22	1
chr10	76096936	76096937	S100b	1		chr10	115126155	115126156	Rab21	1		chr2	26802738	26802739	Rpl7a	9
chr10	76096950	76096951	S100b	1		chr10	115126209	115126210	Rab21	1		chr2	28580909	28580910	Tsc1	1
chr10	76389537	76389538	Lss	1		chr10	115126320	115126321	Rab21	1		chr2	28712558	28712559	Gtf3c4	1
chr10	77401201	77401202	Itgb2	6		chr10	115177886	115177887	Tmem19	2		chr2	28795364	28795365	Ddx31	1
chr10	77434217	77434218	Pttg1ip	1		chr10	115178160	115178161	Tmem19	1		chr2	29072216	29072217	Setx	1
chr10	77434351	77434352	Pttg1ip	1		chr10	115197843	115197844	Tmem19	1		chr2	29921319	29921320	Sptan1	1
chr10	77434509	77434510	Pttg1ip	1		chr10	115197844	115197845	Tmem19	1		chr2	31507364	31507365	Fubp3	1
chr10	77998050	77998051	Gatd3a	1		chr10	115268413	115268414	Zfc3h1	1		chr2	31693489	31693490	Abl1	5
chr10	77998148	77998149	Gatd3a	2		chr10	116886972	116886973	Cct2	1		chr2	33023709	33023710	Ralgps1	4
chr10	78022696	78022697	Trappc10	2		chr10	116886983	116886984	Cct2	2		chr2	37456171	37456172	Rabgap1	2
chr10	78107461	78107462	Agpat3	1		chr10	116887032	116887033	Cct2	15		chr2	38259452	38259453	Lhx2	1
chr10	78236261	78236262	Rrp1	1		chr10	116887100	116887101	Cct2	5		chr2	38259479	38259480	Lhx2	1
chr10	78236270	78236271	Rrp1	1		chr10	116887156	116887157	Cct2	12		chr2	38905231	38905232	Arpc5l	1
chr10	78263198	78263199	Cstb	3		chr10	116887157	116887158	Cct2	21		chr2	38906815	38906816	Golga1	1
chr10	78263235	78263236	Cstb	24		chr10	116887158	116887159	Cct2	30		chr2	44877326	44877327	Zeb2	2
chr10	78263236	78263237	Cstb	31		chr10	116887159	116887160	Cct2	47		chr2	44877336	44877337	Zeb2	2
chr10	78263239	78263240	Cstb	54		chr10	116887161	116887162	Cct2	7		chr2	44877664	44877665	Zeb2	1
chr10	78263290	78263291	Cstb	4		chr10	116888929	116888930	Cct2	5		chr2	44886738	44886739	Zeb2	1
chr10	78263371	78263372	Cstb	10		chr10	116896683	116896684	Cct2	1		chr2	52288700	52288701	Arl5a	1
chr10	78274936	78274937	Pdxk	1		chr10	117113483	117113484	Lyz2	2		chr2	57935550	57935551	Ermn	3
chr10	78420123	78420124	Ilvbl	1		chr10	117114000	117114001	Lyz2	2		chr2	58336540	58336541	Acvr1	1
chr10	78420129	78420130	Ilvbl	2		chr10	117118098	117118099	Lyz2	1		chr2	61614214	61614215	Psmd14	1
chr10	79523994	79523995	Cdc34	1		chr10	117180759	117180760	Cpsf6	1		chr2	62156717	62156718	Slc4a10	1
chr10	80245605	80245606	Tcf3	1		chr10	117180782	117180783	Cpsf6	1		chr2	65853524	65853525	Csrnp3	2
chr10	80542936	80542937	Ap3d1	1		chr10	117183310	117183311	Cpsf6	1		chr2	69701910	69701911	Ssb	1
chr10	80543104	80543105	Ap3d1	1		chr10	117525100	117525101	Mdm2	3		chr2	71271646	71271647	Hat1	2
chr10	80664948	80664949	Oaz1	3		chr10	117526403	117526404	Mdm2	1		chr2	73738849	73738850	Atp5g3	6
chr10	80784606	80784607	Gng7	1		chr10	120059768	120059769	Tmbim4	1		chr2	73738942	73738943	Atp5g3	109
chr10	80864469	80864470	Slc39a3	1		chr10	120060571	120060572	Tmbim4	4		chr2	75497435	75497436	Hnrnpa3	2
chr10	80985065	80985066	Zbtb7a	1		chr10	120060574	120060575	Tmbim4	1		chr2	75499655	75499656	Hnrnpa3	1
chr10	80986562	80986563	Zbtb7a	1		chr10	120759692	120759693	Lemd3	1		chr2	75506712	75506713	Nfe2l2	4
chr10	81018021	81018022	Eef2	1		chr10	121232896	121232897	Gns	1		chr2	75809676	75809677	Ttc30a1	1
chr10	81018032	81018033	Eef2	1		chr10	121232929	121232930	Gns	1		chr2	84595825	84595826	Serping1	19
chr10	81018063	81018064	Eef2	1		chr10	121382561	121382562	Tbk1	4		chr2	84877248	84877249	Ssrp1	1
chr10	81018089	81018090	Eef2	1		chr10	121382777	121382778	Tbk1	2		chr2	90695586	90695587	Mtch2	3
chr10	81108962	81108963	Apba3	2		chr10	122831127	122831128	Mon2	2		chr2	90741313	90741314	Ptpmt1	1
chr10	81201839	81201840	Mfsd12	1		chr10	122831307	122831308	Mon2	1		chr2	91041751	91041752	Acp2	1
chr10	81203024	81203025	Fzr1	1		chr10	125063539	125063540	Slc16a7	1		chr2	91506162	91506163	Atg13	3
chr10	81232132	81232133	Nfic	4		chr10	126835628	126835629	Ctdsp2	2		chr2	97461280	97461281	Lrrc4c	23
chr10	81232203	81232204	Nfic	1		chr10	126902903	126902904	Cdk4	1		chr2	102620900	102620901	Slc1a2	1
chr10	81232259	81232260	Nfic	1		chr10	126903143	126903144	Cdk4	1		chr2	103596546	103596547	Caprin1	5
chr10	81232267	81232268	Nfic	1		chr10	126903293	126903294	Tspan31	4		chr2	103811847	103811848	Lmo2	5
chr10	81232286	81232287	Nfic	1		chr10	127117576	127117577	Dctn2	5		chr2	104588539	104588540	Qser1	1
chr10	81234947	81234948	Nfic	1		chr10	127118041	127118042	Mbd6	2		chr2	112092857	112092858	Nop10	3
chr10	81235007	81235008	Nfic	2		chr10	127118071	127118072	Mbd6	1		chr2	112194241	112194242	Emc4	1
chr10	81235009	81235010	Nfic	1		chr10	127334740	127334741	R3hdm2	1		chr2	112297745	112297746	Emc7	1
chr10	81235042	81235043	Nfic	3		chr10	127334937	127334938	R3hdm2	1		chr2	118579166	118579167	Inafm2	2
chr10	81401873	81401874	Tle5	1		chr10	127335016	127335017	R3hdm2	3		chr2	118754899	118754900	Bahd1	1
chr10	81401889	81401890	Tle5	1		chr10	127335023	127335024	R3hdm2	1		chr2	121140141	121140142	Map1a	5
chr10	82720831	82720832	Txnrd1	1		chr10	127496021	127496022	Stat6	1		chr2	121268219	121268220	Pdia3	82
chr10	82733410	82733411	Txnrd1	2		chr10	127883606	127883607	Naca	1		chr2	121324650	121324651	Mfap1a	2
chr10	82733412	82733413	Txnrd1	1		chr10	127883964	127883965	Naca	1		chr2	121324738	121324739	Mfap1a	1
chr10	83323458	83323459	Aldh1l2	1		chr10	127883971	127883972	Naca	1		chr2	121376219	121376220	Frmd5	8
chr10	83426885	83426886	Washc4	1		chr10	127884174	127884175	Naca	3		chr2	121981542	121981543	B2m	18
chr10	84207431	84207432	Nuak1	1		chr10	127912215	127912216	Ptges3	7		chr2	122525688	122525689	Slc30a4	1
chr10	84207487	84207488	Nuak1	1		chr10	127912623	127912624	Ptges3	1		chr2	125515718	125515719	Eid1	4
chr10	84953318	84953319	Tmem263	1		chr10	127912753	127912754	Ptges3	1		chr2	125515835	125515836	Eid1	7
chr10	85774746	85774747	Rtcb	1		chr10	127912867	127912868	Ptges3	1		chr2	125515982	125515983	Eid1	7
chr10	86184653	86184654	Timp3	1		chr10	127926064	127926065	Atp5b	1		chr2	125516119	125516120	Eid1	1
chr10	86526829	86526830	Hsp90b1	19		chr10	127964774	127964775	Baz2a	2		chr2	125516479	125516480	Eid1	2
chr10	86526855	86526856	Hsp90b1	55		chr10	127964858	127964859	Baz2a	1		chr2	125672558	125672559	Cops2	5
chr10	86526863	86526864	Hsp90b1	14		chr10	127964928	127964929	Baz2a	1		chr2	126471024	126471025	Gabpb1	1
chr10	86526872	86526873	Hsp90b1	4		chr10	128127733	128127734	Stat2	3		chr2	126668696	126668697	Trpm7	1
chr10	86526906	86526907	Hsp90b1	3		chr10	128127751	128127752	Stat2	1		chr2	130871941	130871942	Atrn	5
chr10	86526942	86526943	Hsp90b1	9		chr10	128127831	128127832	Stat2	2		chr2	131366812	131366813	Smox	1
chr10	86526944	86526945	Hsp90b1	18		chr10	128127869	128127870	Stat2	2		chr2	131779300	131779301	Prnp	29
chr10	86527577	86527578	Hsp90b1	1		chr10	128127871	128127872	Stat2	2		chr2	131779448	131779449	Prnp	8
chr10	86528077	86528078	Hsp90b1	1		chr10	128162027	128162028	Cnpy2	2		chr2	131779456	131779457	Prnp	5
chr10	86529316	86529317	Hsp90b1	1		chr10	128162105	128162106	Cnpy2	1		chr2	131779463	131779464	Prnp	15
chr10	86531382	86531383	Hsp90b1	24		chr10	128198235	128198236	Cs	2		chr2	131780016	131780017	Prnp	5
chr10	86531384	86531385	Hsp90b1	12		chr10	128198274	128198275	Cs	2		chr2	131780047	131780048	Prnp	12
chr10	86531385	86531386	Hsp90b1	14		chr10	128237405	128237406	Nabp2	2		chr2	131780082	131780083	Prnp	1
chr10	86531386	86531387	Hsp90b1	21		chr10	128324975	128324976	Smarcc2	3		chr2	131780096	131780097	Prnp	10
chr10	86531552	86531553	Hsp90b1	4		chr10	128324983	128324984	Smarcc2	3		chr2	131780168	131780169	Prnp	7
chr10	86534294	86534295	Hsp90b1	1		chr10	128384124	128384125	Rpl41	4		chr2	131894638	131894639	Slc23a2	2
chr10	86537809	86537810	Hsp90b1	1		chr10	128384829	128384830	Rpl41	1		chr2	132153853	132153854	Cds2	5
chr10	86540222	86540223	Hsp90b1	1		chr10	128394759	128394760	Pa2g4	1		chr2	134438334	134438335	Tmx4	1
chr10	87749632	87749633	Igf1	5		chr10	128395398	128395399	Pa2g4	2		chr2	134439487	134439488	Tmx4	1
chr10	87767280	87767281	Igf1	1		chr10	128396534	128396535	Pa2g4	1		chr2	140505258	140505259	Flrt3	1
chr10	88081718	88081719	Washc3	1		chr10	128403697	128403698	Erbb3	2		chr2	142913475	142913476	Snrpb2	2
chr10	88081791	88081792	Washc3	2		chr10	128403798	128403799	Erbb3	2		chr2	142913526	142913527	Snrpb2	2
chr10	88081811	88081812	Washc3	1		chr10	128461094	128461095	Rps26	6		chr2	145483839	145483840	Slc24a3	1
chr10	88282287	88282288	Gnptab	1		chr10	128513287	128513288	Rab5b	15		chr2	148713816	148713817	Cst3	98
chr10	88282375	88282376	Gnptab	1		chr10	128556264	128556265	Dgka	1		chr2	153249553	153249554	Nol4l	3
chr10	88282390	88282391	Gnptab	1		chr10	128653660	128653661	Dnajc14	1		chr2	154730136	154730137	Eif2s2	2
chr10	88282468	88282469	Gnptab	1		chr10	128653783	128653784	Dnajc14	1		chr2	155119728	155119729	Map1lc3a	1
chr10	88310306	88310307	Chpt1	2		chr10	128747414	128747415	Cd63	2		chr2	155231537	155231538	Trp53inp2	1
chr10	89476210	89476211	Scyl2	1		chr10	128748109	128748110	Cd63	87		chr2	155860089	155860090	Ergic3	1
chr10	89568074	89568075	Actr6	1		chr10	128748112	128748113	Cd63	160		chr2	156151613	156151614	Phf20	3
chr10	89654237	89654238	Uhrf1bp1l	1		chr10	128748115	128748116	Cd63	125		chr2	156151673	156151674	Phf20	1
chr10	90806041	90806042	Anks1b	1		chr10	128748130	128748131	Cd63	5		chr2	156408992	156408993	Aar2	1
chr10	90806305	90806306	Anks1b	1		chr11	3200144	3200145	Drg1	4		chr2	162777023	162777024	Srsf6	2
chr10	90825289	90825290	Apaf1	3		chr11	3200201	3200202	Drg1	2		chr2	163859855	163859856	Ywhab	17
chr10	90825337	90825338	Apaf1	1		chr11	3200243	3200244	Drg1	2		chr2	163859936	163859937	Ywhab	3
chr10	90952945	90952946	Slc25a3	3		chr11	3594147	3594148	Tug1	3		chr2	163860018	163860019	Ywhab	1
chr10	90983738	90983739	Tmpo	6		chr11	3929033	3929034	Pes1	1		chr2	164332358	164332359	Dbndd2	382
chr10	90983749	90983750	Tmpo	1		chr11	4431095	4431096	Mtmr3	1		chr2	164350100	164350101	Pigt	5
chr10	90983763	90983764	Tmpo	1		chr11	4431154	4431155	Mtmr3	1		chr2	168023218	168023219	Adnp	1
chr10	90983802	90983803	Tmpo	1		chr11	4635361	4635362	Ascc2	1		chr2	173625822	173625823	Vapb	1
chr10	90984773	90984774	Tmpo	3		chr11	5010672	5010673	Gas2l1	2		chr2	179554158	179554159	Taf4	1
chr10	90985189	90985190	Tmpo	1		chr11	5010696	5010697	Gas2l1	1		chr2	179899606	179899607	Rps21	29
chr10	93075707	93075708	Cdk17	1		chr11	5010697	5010698	Gas2l1	4		chr2	180227758	180227759	Mrgbp	1
chr10	93320564	93320565	Lta4h	1		chr11	5010726	5010727	Gas2l1	1		chr2	181297220	181297221	Prpf6	2
chr10	93423883	93423884	Snrpf	1		chr11	5019931	5019932	Ewsr1	2		chr2	181497298	181497299	Pcmtd2	2
chr10	93423884	93423885	Snrpf	1		chr11	5020296	5020297	Ewsr1	1		chr3	8965101	8965102	Mrps28	2
chr10	93696851	93696852	Metap2	1		chr11	5141680	5141681	Kremen1	1		chr3	10379331	10379332	Impa1	1
chr10	93696861	93696862	Metap2	1		chr11	5141748	5141749	Kremen1	2		chr3	14672337	14672338	Rbis	3
chr10	93697053	93697054	Metap2	2		chr11	5141809	5141810	Kremen1	1		chr3	14965424	14965425	Car2	202
chr10	93704773	93704774	Metap2	1		chr11	5475633	5475634	Xbp1	1		chr3	23853427	23853428	Naaladl2	1
chr10	93704782	93704783	Metap2	1		chr11	5475634	5475635	Xbp1	2		chr3	30847528	30847529	Sec62	1
chr10	93715474	93715475	Metap2	1		chr11	5750360	5750361	Dbnl	1		chr3	30875306	30875307	Sec62	1
chr10	94056574	94056575	Ndufa12	1		chr11	5778146	5778147	Polm	1		chr3	30953671	30953672	Phc3	1
chr10	94056588	94056589	Ndufa12	7		chr11	6306345	6306346	Ogdh	2		chr3	30953790	30953791	Phc3	1
chr10	94056589	94056590	Ndufa12	1		chr11	6306374	6306375	Ogdh	7		chr3	32518313	32518314	Pik3ca	1
chr10	94056592	94056593	Ndufa12	1		chr11	6306379	6306380	Ogdh	2		chr3	34123279	34123280	Fxr1	4
chr10	94424468	94424469	Tmcc3	1		chr11	6306525	6306526	Ogdh	2		chr3	37001971	37001972	4932438A13Rik	1
chr10	94604744	94604745	Cep83	1		chr11	6369273	6369274	Ppia	1		chr3	41021269	41021270	Pgrmc2	1
chr10	94628397	94628398	Plxnc1	1		chr11	6369733	6369734	Ppia	5		chr3	51381369	51381370	Naa15	1
chr10	95378768	95378769	Ube2n	2		chr11	6377456	6377457	H2az2	1		chr3	52256808	52256809	Foxo1	1
chr10	95383128	95383129	Nudt4	1		chr11	6377461	6377462	H2az2	2		chr3	55532940	55532941	Nbea	2
chr10	95862651	95862652	Eea1	3		chr11	6417709	6417710	Purb	1		chr3	61274361	61274362	Rap2b	2
chr10	98832738	98832739	Atp2b1	1		chr11	6417800	6417801	Purb	2		chr3	61274376	61274377	Rap2b	2
chr10	98858865	98858866	Atp2b1	2		chr11	6417883	6417884	Purb	1		chr3	62377711	62377712	Dhx36	3
chr10	98858957	98858958	Atp2b1	1		chr11	6417887	6417888	Purb	1		chr3	63870958	63870959	Slc33a1	1
chr10	98858973	98858974	Atp2b1	1		chr11	6420140	6420141	Purb	1		chr3	63871059	63871060	Slc33a1	2
chr10	98859198	98859199	Atp2b1	1		chr11	6421301	6421302	Purb	1		chr3	65853949	65853950	Ccnl1	6
chr10	98859292	98859293	Atp2b1	2		chr11	6422313	6422314	Purb	1		chr3	67263684	67263685	Rsrc1	5
chr10	98859366	98859367	Atp2b1	2		chr11	6423110	6423111	Purb	1		chr3	69462177	69462178	Ppm1l	1
chr10	98859426	98859427	Atp2b1	1		chr11	6424404	6424405	Purb	1		chr3	69462436	69462437	Ppm1l	5
chr10	98859503	98859504	Atp2b1	3		chr11	8381760	8381761	Tns3	2		chr3	75785241	75785242	Golim4	1
chr10	98859509	98859510	Atp2b1	2		chr11	8381932	8381933	Tns3	2		chr3	79511367	79511368	Etfdh	2
chr10	98859621	98859622	Atp2b1	2		chr11	16454798	16454799	Sec61g	1		chr3	81862715	81862716	Ctso	4
chr10	98859632	98859633	Atp2b1	1		chr11	16458104	16458105	Sec61g	9		chr3	84067870	84067871	Trim2	6
chr10	98859750	98859751	Atp2b1	2		chr11	16458109	16458110	Sec61g	36		chr3	84070825	84070826	Trim2	6
chr10	98859764	98859765	Atp2b1	2		chr11	16458111	16458112	Sec61g	19		chr3	87963911	87963912	Naxe	1
chr10	99033317	99033318	Poc1b	1		chr11	16458112	16458113	Sec61g	47		chr3	88652098	88652099	Syt11	247
chr10	105024797	105024798	Tmtc2	1		chr11	17148979	17148980	Ppp3r1	1		chr3	88652238	88652239	Syt11	45
chr10	108089241	108089242	Ppp1r12a	1		chr11	17149670	17149671	Ppp3r1	1		chr3	88652394	88652395	Syt11	53
chr10	108113320	108113321	Ppp1r12a	1		chr11	17149967	17149968	Ppp3r1	1		chr3	88654835	88654836	Syt11	1
chr10	108335440	108335441	Syt1	1		chr11	17153511	17153512	Pno1	3		chr3	88714409	88714410	1500004A13Rik	1
chr10	110777850	110777851	Zdhhc17	1		chr11	17153793	17153794	Pno1	1		chr3	88714427	88714428	1500004A13Rik	6
chr10	111322587	111322588	Nap1l1	2		chr11	17217059	17217060	C1d	6		chr3	88891715	88891716	Ash1l	1
chr10	111326982	111326983	Nap1l1	3		chr11	20012419	20012420	Actr2	1		chr3	88930433	88930434	Ash1l	1
chr10	111333823	111333824	Nap1l1	1		chr11	20012744	20012745	Actr2	3		chr3	89089999	89090000	Gm45927	4
chr10	112761559	112761560	Atxn7l3b	3		chr11	20174464	20174465	Rab1a	1		chr3	89689805	89689806	Ube2q1	14
chr10	112761665	112761666	Atxn7l3b	1		chr11	20175121	20175122	Rab1a	3		chr3	90142948	90142949	Jtb	14
chr10	112762385	112762386	Atxn7l3b	1		chr11	20175122	20175123	Rab1a	4		chr3	90142954	90142955	Jtb	19
chr10	112762434	112762435	Atxn7l3b	1		chr11	20175123	20175124	Rab1a	2		chr3	90160539	90160540	Slc39a1	2
chr10	112762451	112762452	Atxn7l3b	1		chr11	20175332	20175333	Rab1a	1		chr3	90268756	90268757	Gatad2b	1
chr10	112762471	112762472	Atxn7l3b	1		chr11	20175362	20175363	Rab1a	2		chr3	90395940	90395941	Snapin	2
chr10	115125980	115125981	Rab21	1		chr11	20598913	20598914	Sertad2	1		chr3	94408139	94408140	Snx27	2
chr10	115178161	115178162	Tmem19	1		chr11	20602804	20602805	Sertad2	2		chr3	95463544	95463545	Ctss	18
chr10	115197844	115197845	Tmem19	1		chr11	20635335	20635336	Aftph	2		chr3	95537749	95537750	Ensa	7
chr10	115204638	115204639	Thap2	1		chr11	20635532	20635533	Aftph	1		chr3	100592040	100592041	Man1a2	1
chr10	116886956	116886957	Cct2	3		chr11	20635995	20635996	Aftph	1		chr3	102952125	102952126	Csde1	1
chr10	116887156	116887157	Cct2	20		chr11	20635999	20636000	Aftph	1		chr3	103647347	103647348	Hipk1	12
chr10	116887157	116887158	Cct2	9		chr11	20636042	20636043	Aftph	1		chr3	103647410	103647411	Hipk1	4
chr10	116887158	116887159	Cct2	30		chr11	21098430	21098431	Peli1	1		chr3	104833840	104833841	St7l	5
chr10	116887159	116887160	Cct2	29		chr11	21099077	21099078	Peli1	1		chr3	106629351	106629352	Lrif1	1
chr10	116887161	116887162	Cct2	5		chr11	21099134	21099135	Peli1	1		chr3	106667983	106667984	Cd53	2
chr10	116896619	116896620	Cct2	1		chr11	21099217	21099218	Peli1	2		chr3	107570681	107570682	Ahcyl1	9
chr10	116896679	116896680	Cct2	2		chr11	21099760	21099761	Peli1	1		chr3	107570848	107570849	Ahcyl1	2
chr10	116897949	116897950	Cct2	1		chr11	21100129	21100130	Peli1	2		chr3	107648676	107648677	Csf1	20
chr10	117051392	117051393	Yeats4	1		chr11	21100135	21100136	Peli1	1		chr3	108014785	108014786	Gnai3	1
chr10	117113494	117113495	Lyz2	11		chr11	21271775	21271776	Ugp2	1		chr3	108700863	108700864	Stxbp3	4
chr10	117183314	117183315	Cpsf6	1		chr11	21283803	21283804	Ugp2	1		chr3	115822424	115822425	Extl2	1
chr10	117520883	117520884	Cpm	1		chr11	21507519	21507520	Mdh1	1		chr3	116282804	116282805	Rtca	1
chr10	117523218	117523219	Cpm	1		chr11	21508512	21508513	Mdh1	1		chr3	122060285	122060286	Gclm	1
chr10	117524896	117524897	Mdm2	1		chr11	22784987	22784988	B3gnt2	2		chr3	122060295	122060296	Gclm	2
chr10	117524905	117524906	Mdm2	2		chr11	22906433	22906434	Commd1	1		chr3	122078137	122078138	Dnttip2	1
chr10	117526384	117526385	Mdm2	1		chr11	22952892	22952893	Cct4	3		chr3	126715418	126715419	Ank2	6
chr10	117569889	117569890	Slc35e3	1		chr11	22953320	22953321	Cct4	1		chr3	126717159	126717160	Ank2	1
chr10	117651426	117651427	Rap1b	2		chr11	23246608	23246609	Xpo1	1		chr3	126717251	126717252	Ank2	10
chr10	117651532	117651533	Rap1b	3		chr11	23314476	23314477	Usp34	1		chr3	130489759	130489760	Ostc	1
chr10	117651592	117651593	Rap1b	1		chr11	23314482	23314483	Usp34	1		chr3	130522484	130522485	Rpl34	28
chr10	119038714	119038715	Cand1	2		chr11	23439829	23439830	Ahsa2	2		chr3	135172200	135172201	Ube2d3	1
chr10	119038717	119038718	Cand1	3		chr11	23440715	23440716	Ahsa2	1		chr3	137614423	137614424	Dnajb14	4
chr10	120059768	120059769	Tmbim4	1		chr11	29159374	29159375	Ppp4r3b	1		chr3	142252366	142252367	Gbp7	53
chr10	120060564	120060565	Tmbim4	2		chr11	29171672	29171673	Cfap36	4		chr3	142252452	142252453	Gbp7	18
chr10	120060571	120060572	Tmbim4	7		chr11	29171768	29171769	Cfap36	2		chr3	144303162	144303163	Selenof	12
chr10	120060573	120060574	Tmbim4	2		chr11	29171917	29171918	Cfap36	2		chr3	144303198	144303199	Selenof	27
chr10	120060574	120060575	Tmbim4	4		chr11	29172799	29172800	Cfap36	12		chr3	144394841	144394842	Sh3glb1	2
chr10	120060577	120060578	Tmbim4	3		chr11	29413179	29413180	Ccdc88a	3		chr3	145649741	145649742	2410004B18Rik	3
chr10	120060606	120060607	Tmbim4	1		chr11	29413181	29413182	Ccdc88a	2		chr3	145649760	145649761	2410004B18Rik	5
chr10	120067419	120067420	Llph	1		chr11	29414106	29414107	Ccdc88a	1		chr3	145649776	145649777	2410004B18Rik	1
chr10	120759657	120759658	Lemd3	1		chr11	29459080	29459081	Ccdc88a	1		chr3	145649793	145649794	2410004B18Rik	4
chr10	121233046	121233047	Gns	3		chr11	29496707	29496708	Rps27a	6		chr3	145649805	145649806	2410004B18Rik	2
chr10	121382560	121382561	Tbk1	2		chr11	29496711	29496712	Rps27a	12		chr3	145649823	145649824	2410004B18Rik	9
chr10	121382561	121382562	Tbk1	6		chr11	29496721	29496722	Rps27a	1		chr3	146435546	146435547	Prkacb	42
chr10	121382777	121382778	Tbk1	2		chr11	29657213	29657214	Rtn4	6		chr3	146686622	146686623	Ttll7	3
chr10	121382779	121382780	Tbk1	1		chr11	29657217	29657218	Rtn4	1		chr3	151938210	151938211	Fubp1	1
chr10	121423549	121423550	Xpot	1		chr11	29657796	29657797	Rtn4	1		chr3	153613161	153613162	Rabggtb	2
chr10	122831186	122831187	Mon2	1		chr11	29692313	29692314	Rtn4	3		chr3	153613210	153613211	Rabggtb	1
chr10	122856311	122856312	Mon2	1		chr11	29692578	29692579	Rtn4	91		chr3	153628162	153628163	Acadm	3
chr10	125850880	125850881	Lrig3	2		chr11	29692579	29692580	Rtn4	64		chr3	153628200	153628201	Acadm	6
chr10	126903293	126903294	Tspan31	4		chr11	29692583	29692584	Rtn4	24		chr3	157253868	157253869	Zranb2	2
chr10	126903384	126903385	Tspan31	2		chr11	29692590	29692591	Rtn4	25		chr4	4764581	4764582	Bpnt2	4
chr10	126903393	126903394	Tspan31	2		chr11	29692594	29692595	Rtn4	40		chr4	6394898	6394899	Sdcbp	2
chr10	126903504	126903505	Tspan31	1		chr11	29692613	29692614	Rtn4	33		chr4	8607337	8607338	Rab2a	3
chr10	126931650	126931651	Os9	3		chr11	29692624	29692625	Rtn4	25		chr4	9450843	9450844	Clvs1	1
chr10	126931686	126931687	Os9	1		chr11	29692635	29692636	Rtn4	2		chr4	10899054	10899055	2610301B20Rik	1
chr10	126931741	126931742	Os9	2		chr11	29692641	29692642	Rtn4	33		chr4	11213774	11213775	Ints8	1
chr10	127061628	127061629	Kif5a	1		chr11	29692689	29692690	Rtn4	71		chr4	11527710	11527711	Virma	2
chr10	127064123	127064124	Kif5a	1		chr11	29692704	29692705	Rtn4	31		chr4	14810187	14810188	Otud6b	1
chr10	127064162	127064163	Kif5a	2		chr11	29692710	29692711	Rtn4	29		chr4	21748195	21748196	Ccnc	1
chr10	127064177	127064178	Kif5a	3		chr11	29692715	29692716	Rtn4	26		chr4	26327638	26327639	Manea	1
chr10	127064182	127064183	Kif5a	1		chr11	29692719	29692720	Rtn4	24		chr4	34805836	34805837	Zfp292	1
chr10	127064221	127064222	Kif5a	1		chr11	29692734	29692735	Rtn4	57		chr4	40205161	40205162	Ddx58	2
chr10	127334966	127334967	R3hdm2	1		chr11	29692827	29692828	Rtn4	15		chr4	40733514	40733515	Dnaja1	1
chr10	127334993	127334994	R3hdm2	6		chr11	30050089	30050090	Sptbn1	1		chr4	40733744	40733745	Dnaja1	8
chr10	127335016	127335017	R3hdm2	2		chr11	30792036	30792037	Psme4	1		chr4	40965223	40965224	Chmp5	10
chr10	127335085	127335086	R3hdm2	1		chr11	30881659	30881660	Erlec1	1		chr4	41191132	41191133	Ube2r2	4
chr10	127335112	127335113	R3hdm2	3		chr11	30881720	30881721	Erlec1	1		chr4	41191171	41191172	Ube2r2	3
chr10	127496016	127496017	Stat6	2		chr11	30881796	30881797	Erlec1	1		chr4	42980154	42980155	Vcp	1
chr10	127883616	127883617	Naca	3		chr11	30902671	30902672	Erlec1	3		chr4	44032634	44032635	Clta	1
chr10	127883889	127883890	Naca	3		chr11	30902674	30902675	Erlec1	2		chr4	46034460	46034461	Tdrd7	1
chr10	127883941	127883942	Naca	3		chr11	31615348	31615349	Bod1	1		chr4	49585560	49585561	Pgap4	1
chr10	127884165	127884166	Naca	4		chr11	31883748	31883749	Cpeb4	1		chr4	49585639	49585640	Pgap4	1
chr10	127884174	127884175	Naca	9		chr11	31885272	31885273	Cpeb4	2		chr4	53763059	53763060	Fktn	1
chr10	127884180	127884181	Naca	1		chr11	31885330	31885331	Cpeb4	1		chr4	53860395	53860396	Tmem38b	1
chr10	127964774	127964775	Baz2a	2		chr11	32696336	32696337	Fbxw11	1		chr4	55390338	55390339	Rad23b	3
chr10	127964898	127964899	Baz2a	1		chr11	32696464	32696465	Fbxw11	2		chr4	55390577	55390578	Rad23b	1
chr10	128088485	128088486	Timeless	1		chr11	33102635	33102636	Npm1	4		chr4	55390870	55390871	Rad23b	2
chr10	128117264	128117265	Stat2	1		chr11	33102715	33102716	Npm1	4		chr4	59471985	59471986	Ptbp3	1
chr10	128127734	128127735	Stat2	1		chr11	33102724	33102725	Npm1	8		chr4	59473573	59473574	Ptbp3	1
chr10	128127768	128127769	Stat2	1		chr11	33102777	33102778	Npm1	1		chr4	63468812	63468813	Atp6v1g1	7
chr10	128127831	128127832	Stat2	1		chr11	33102798	33102799	Npm1	2		chr4	81196874	81196875	Mpdz	2
chr10	128127870	128127871	Stat2	2		chr11	33102833	33102834	Npm1	2		chr4	81197650	81197651	Mpdz	1
chr10	128127871	128127872	Stat2	2		chr11	33110358	33110359	Npm1	1		chr4	82214562	82214563	Nfib	2
chr10	128127872	128127873	Stat2	4		chr11	33110851	33110852	Npm1	1		chr4	83374059	83374060	Psip1	1
chr10	128127874	128127875	Stat2	4		chr11	35681922	35681923	Pank3	3		chr4	85307469	85307470	Sh3gl2	1
chr10	128128260	128128261	Stat2	1		chr11	40570317	40570318	Mat2b	1		chr4	86773129	86773130	Rps6	26
chr10	128128639	128128640	Stat2	2		chr11	40570370	40570371	Mat2b	2		chr4	86902092	86902093	Slc24a2	4
chr10	128162028	128162029	Cnpy2	3		chr11	40630549	40630550	Nudcd2	1		chr4	86902365	86902366	Slc24a2	8
chr10	128162030	128162031	Cnpy2	1		chr11	40639709	40639710	Ccng1	4		chr4	86903354	86903355	Slc24a2	1
chr10	128162105	128162106	Cnpy2	1		chr11	40639766	40639767	Ccng1	1		chr4	88636732	88636733	Klhl9	3
chr10	128198106	128198107	Cs	3		chr11	40639779	40639780	Ccng1	2		chr4	94455574	94455575	Plaa	1
chr10	128198177	128198178	Cs	2		chr11	43311215	43311216	Pttg1	2		chr4	100860777	100860778	Cachd1	2
chr10	128237401	128237402	Nabp2	1		chr11	43334151	43334152	Slu7	1		chr4	101036842	101036843	Jak1	3
chr10	128275157	128275158	Rnf41	1		chr11	43334155	43334156	Slu7	1		chr4	106519783	106519784	Ttc4	2
chr10	128275213	128275214	Rnf41	1		chr11	43337816	43337817	Slu7	2		chr4	106519802	106519803	Ttc4	1
chr10	128324970	128324971	Smarcc2	1		chr11	44456071	44456072	Rnf145	1		chr4	106905521	106905522	Ssbp3	2
chr10	128324983	128324984	Smarcc2	1		chr11	46037821	46037822	Adam19	1		chr4	106906682	106906683	Ssbp3	1
chr10	128324986	128324987	Smarcc2	3		chr11	46039600	46039601	Nipal4	1		chr4	106906773	106906774	Ssbp3	1
chr10	128325096	128325097	Smarcc2	2		chr11	46084958	46084959	Cyfip2	1		chr4	107057935	107057936	Tmem59	38
chr10	128325845	128325846	Smarcc2	1		chr11	48756249	48756250	Irgm1	21		chr4	107058005	107058006	Tmem59	6
chr10	128325946	128325947	Smarcc2	1		chr11	48756548	48756549	Irgm1	12		chr4	107901593	107901594	Scp2	1
chr10	128326842	128326843	Myl6	5		chr11	48877935	48877936	Tgtp1	2		chr4	107901642	107901643	Scp2	8
chr10	128326859	128326860	Myl6	1		chr11	48878335	48878336	Tgtp1	1		chr4	108719138	108719139	Txndc12	6
chr10	128384101	128384102	Rpl41	44		chr11	48949849	48949850	Tgtp2	17		chr4	108917375	108917376	Nrd1	1
chr10	128395375	128395376	Pa2g4	1		chr11	48950358	48950359	Tgtp2	3		chr4	109311343	109311344	Rnf11	1
chr10	128403654	128403655	Erbb3	1		chr11	48950556	48950557	Tgtp2	4		chr4	109311384	109311385	Rnf11	3
chr10	128461095	128461096	Rps26	35		chr11	48950581	48950582	Tgtp2	2		chr4	115616033	115616034	Efcab14	3
chr10	128513158	128513159	Rab5b	1		chr11	48954963	48954964	Tgtp2	1		chr4	116496170	116496171	Akr1a1	29
chr10	128653689	128653690	Dnajc14	1		chr11	48987458	48987459	Ifi47	9		chr4	116556645	116556646	Prdx1	47
chr10	128653745	128653746	Dnajc14	1		chr11	48987568	48987569	Ifi47	3		chr4	116557054	116557055	Prdx1	1
chr10	128654472	128654473	Ormdl2	1		chr11	49562422	49562423	Cnot6	1		chr4	118065684	118065685	Ptprf	19
chr10	128684138	128684139	Sarnp	1		chr11	49565762	49565763	Cnot6	1		chr4	118065686	118065687	Ptprf	6
chr10	128747405	128747406	Cd63	1		chr11	49962111	49962112	Rnf130	2		chr4	118065750	118065751	Ptprf	3
chr10	128747671	128747672	Cd63	1		chr11	49986773	49986774	Rnf130	2		chr4	120842418	120842419	Smap2	1
chr10	128748052	128748053	Cd63	2		chr11	49986776	49986777	Rnf130	1		chr4	123609723	123609724	Ndufs5	1
chr10	128748075	128748076	Cd63	1		chr11	49986778	49986779	Rnf130	15		chr4	123629478	123629479	Akirin1	1
chr10	128748109	128748110	Cd63	75		chr11	49990127	49990128	Rnf130	18		chr4	123630552	123630553	Akirin1	3
chr10	128748112	128748113	Cd63	107		chr11	49990133	49990134	Rnf130	11		chr4	123830545	123830546	Rragc	2
chr10	128748115	128748116	Cd63	89		chr11	49995414	49995415	Rnf130	1		chr4	123830560	123830561	Rragc	7
chr10	128748325	128748326	Cd63	1		chr11	49995460	49995461	Rnf130	9		chr4	124749130	124749131	Maneal	7
chr10	128755855	128755856	Bloc1s1	1		chr11	49995472	49995473	Rnf130	13		chr4	124749151	124749152	Maneal	1
chr11	3200134	3200135	Drg1	3		chr11	49995474	49995475	Rnf130	24		chr4	125003384	125003385	Meaf6	2
chr11	3200144	3200145	Drg1	1		chr11	50091250	50091251	Sqstm1	37		chr4	125003420	125003421	Meaf6	1
chr11	3292954	3292955	Pik3ip1	1		chr11	50091253	50091254	Sqstm1	25		chr4	126058466	126058467	Thrap3	1
chr11	3467274	3467275	Selenom	1		chr11	50091284	50091285	Sqstm1	92		chr4	129382028	129382029	Bsdc1	1
chr11	3594112	3594113	Tug1	1		chr11	50091287	50091288	Sqstm1	69		chr4	129410194	129410195	Hdac1	3
chr11	3594147	3594148	Tug1	1		chr11	50091312	50091313	Sqstm1	11		chr4	129537860	129537861	Kpna6	1
chr11	3597289	3597290	Tug1	1		chr11	50091314	50091315	Sqstm1	29		chr4	129743437	129743438	Ptp4a2	1
chr11	4190777	4190778	Osm	5		chr11	50091319	50091320	Sqstm1	3		chr4	129743667	129743668	Ptp4a2	1
chr11	4652026	4652027	Uqcr10	5		chr11	50091325	50091326	Sqstm1	3		chr4	130508543	130508544	Pum1	2
chr11	4652038	4652039	Uqcr10	2		chr11	50091338	50091339	Sqstm1	1		chr4	130508546	130508547	Pum1	1
chr11	4652069	4652070	Uqcr10	2		chr11	50185444	50185445	Canx	2		chr4	130508734	130508735	Pum1	1
chr11	5010667	5010668	Gas2l1	1		chr11	50185586	50185587	Canx	3		chr4	130553377	130553378	Sdc3	18
chr11	5010697	5010698	Gas2l1	1		chr11	50185594	50185595	Canx	1		chr4	132038151	132038152	Snhg12	2
chr11	5141680	5141681	Kremen1	1		chr11	50185632	50185633	Canx	1		chr4	132079525	132079526	Snhg3	1
chr11	5141784	5141785	Kremen1	2		chr11	50185634	50185635	Canx	1		chr4	134200800	134200801	Stmn1	134
chr11	5141809	5141810	Kremen1	1		chr11	50185890	50185891	Canx	1		chr4	134201111	134201112	Stmn1	86
chr11	5475633	5475634	Xbp1	2		chr11	50185934	50185935	Canx	4		chr4	134530403	134530404	Maco1	2
chr11	5475634	5475635	Xbp1	3		chr11	50185991	50185992	Canx	5		chr4	135048023	135048024	Srrm1	1
chr11	5475662	5475663	Xbp1	1		chr11	50186036	50186037	Canx	8		chr4	135176331	135176332	Nipal3	9
chr11	5475672	5475673	Xbp1	1		chr11	50186052	50186053	Canx	16		chr4	135176339	135176340	Nipal3	13
chr11	5750360	5750361	Dbnl	3		chr11	50186054	50186055	Canx	21		chr4	137934039	137934040	Eif4g3	3
chr11	6306368	6306369	Ogdh	2		chr11	50186056	50186057	Canx	18		chr4	137934134	137934135	Eif4g3	2
chr11	6306372	6306373	Ogdh	2		chr11	50186057	50186058	Canx	8		chr4	137970154	137970155	Hp1bp3	1
chr11	6306373	6306374	Ogdh	1		chr11	50186058	50186059	Canx	26		chr4	138040903	138040904	Pink1	2
chr11	6306375	6306376	Ogdh	2		chr11	50186090	50186091	Canx	5		chr4	138040925	138040926	Pink1	1
chr11	6306381	6306382	Ogdh	3		chr11	50186135	50186136	Canx	3		chr4	149261038	149261039	Kif1b	95
chr11	6306384	6306385	Ogdh	3		chr11	50188955	50188956	Canx	2		chr4	149261039	149261040	Kif1b	118
chr11	6306408	6306409	Ogdh	2		chr11	50198399	50198400	Canx	1		chr4	149265058	149265059	Kif1b	1
chr11	6368244	6368245	Ppia	1		chr11	50199682	50199683	Canx	1		chr4	149412940	149412941	Ube4b	1
chr11	6369183	6369184	Ppia	1		chr11	50216332	50216333	Canx	1		chr4	149733305	149733306	Clstn1	5
chr11	6369273	6369274	Ppia	1		chr11	50277167	50277168	Hnrnph1	1		chr4	152418370	152418371	Rpl22	4
chr11	6369715	6369716	Ppia	1		chr11	51166247	51166248	Clk4	1		chr4	155065256	155065257	Pank4	1
chr11	6417714	6417715	Purb	1		chr11	51172350	51172351	Clk4	3		chr4	155159362	155159363	Rer1	1
chr11	6417796	6417797	Purb	1		chr11	51491884	51491885	Hnrnpab	1		chr4	155240640	155240641	Ski	1
chr11	6420115	6420116	Purb	2		chr11	51491934	51491935	Hnrnpab	1		chr4	155240675	155240676	Ski	1
chr11	6424637	6424638	Purb	1		chr11	51492061	51492062	Phykpl	7		chr4	155641999	155642000	Gnb1	1
chr11	8381918	8381919	Tns3	2		chr11	51492074	51492075	Hnrnpab	1		chr4	155643546	155643547	Gnb1	5
chr11	16458108	16458109	Sec61g	35		chr11	51576461	51576462	0610009B22Rik	2		chr4	155675360	155675361	Nadk	5
chr11	16458109	16458110	Sec61g	40		chr11	51576537	51576538	0610009B22Rik	1		chr5	16575718	16575719	Cacna2d1	1
chr11	16458111	16458112	Sec61g	67		chr11	51583280	51583281	Sec24a	1		chr5	16575911	16575912	Cacna2d1	1
chr11	16458112	16458113	Sec61g	68		chr11	51682313	51682314	Sar1b	3		chr5	16575941	16575942	Cacna2d1	1
chr11	16458127	16458128	Sec61g	3		chr11	51682578	51682579	Sar1b	1		chr5	21091207	21091208	Tmem60	8
chr11	17150034	17150035	Ppp3r1	2		chr11	51682583	51682584	Sar1b	1		chr5	22008691	22008692	Psmc2	17
chr11	17153356	17153357	Pno1	1		chr11	51876527	51876528	Ube2b	1		chr5	23708601	23708602	Kmt2e	3
chr11	17153372	17153373	Pno1	1		chr11	51876919	51876920	Ube2b	4		chr5	23710673	23710674	Srpk2	1
chr11	17153479	17153480	Pno1	2		chr11	51876951	51876952	Ube2b	2		chr5	24048971	24048972	Tomm7	15
chr11	17153507	17153508	Pno1	1		chr11	51877010	51877011	Ube2b	1		chr5	24914589	24914590	Nub1	1
chr11	17153672	17153673	Pno1	1		chr11	51877011	51877012	Ube2b	1		chr5	29971820	29971821	Dnajb6	1
chr11	17153717	17153718	Pno1	1		chr11	51877369	51877370	Ube2b	1		chr5	31672223	31672224	Supt7l	1
chr11	17216957	17216958	C1d	1		chr11	51877568	51877569	Ube2b	1		chr5	32649809	32649810	Ppp1cb	1
chr11	17217059	17217060	C1d	4		chr11	51877621	51877622	Ube2b	2		chr5	33184949	33184950	Ywhah	6
chr11	20012344	20012345	Actr2	2		chr11	52013310	52013311	Ppp2ca	29		chr5	33184984	33184985	Ywhah	2
chr11	20012744	20012745	Actr2	8		chr11	52013311	52013312	Ppp2ca	36		chr5	33184987	33184988	Ywhah	2
chr11	20012877	20012878	Actr2	1		chr11	52013313	52013314	Ppp2ca	8		chr5	33530498	33530499	Maea	2
chr11	20175121	20175122	Rab1a	10		chr11	52134536	52134537	Skp1	1		chr5	34510690	34510691	Rnf4	4
chr11	20175122	20175123	Rab1a	3		chr11	52251975	52251976	Vdac1	1		chr5	36631263	36631264	Tada2b	2
chr11	20175123	20175124	Rab1a	8		chr11	52280023	52280024	Vdac1	3		chr5	36631316	36631317	Tada2b	1
chr11	20175249	20175250	Rab1a	1		chr11	52299220	52299221	9530068E07Rik	1		chr5	36952607	36952608	Mrfap1	2
chr11	20598910	20598911	Sertad2	1		chr11	53175003	53175004	Hspa4	1		chr5	37112273	37112274	Ppp2r2c	3
chr11	20635344	20635345	Aftph	1		chr11	53321420	53321421	Uqcrq	1		chr5	37112329	37112330	Ppp2r2c	9
chr11	20635541	20635542	Aftph	2		chr11	53434832	53434833	Septin8	1		chr5	39771573	39771574	Hs3st1	23
chr11	20635885	20635886	Aftph	2		chr11	53474832	53474833	Kif3a	1		chr5	39771588	39771589	Hs3st1	11
chr11	20635920	20635921	Aftph	2		chr11	53494784	53494785	Kif3a	3		chr5	39771592	39771593	Hs3st1	3
chr11	20635944	20635945	Aftph	2		chr11	53667910	53667911	Irf1	1		chr5	45591624	45591625	Qdpr	29
chr11	20635995	20635996	Aftph	1		chr11	53668049	53668050	Irf1	5		chr5	65546000	65546001	Rpl9	6
chr11	20635999	20636000	Aftph	1		chr11	53668059	53668060	Irf1	21		chr5	65546902	65546903	Rpl9	23
chr11	20636005	20636006	Aftph	1		chr11	54407327	54407328	Fnip1	2		chr5	65570715	65570716	Ugdh	1
chr11	20636019	20636020	Aftph	1		chr11	54407449	54407450	Fnip1	1		chr5	65751808	65751809	Ube2k	1
chr11	21098432	21098433	Peli1	1		chr11	54408817	54408818	Fnip1	1		chr5	77115231	77115232	Paics	35
chr11	21099077	21099078	Peli1	1		chr11	54408867	54408868	Fnip1	1		chr5	88789224	88789225	Rufy3	2
chr11	21262925	21262926	Vps54	3		chr11	54608377	54608378	Cdc42se2	4		chr5	88789250	88789251	Rufy3	1
chr11	21272024	21272025	Ugp2	2		chr11	54608411	54608412	Cdc42se2	1		chr5	88789256	88789257	Rufy3	6
chr11	21272082	21272083	Ugp2	1		chr11	54608594	54608595	Cdc42se2	1		chr5	88789270	88789271	Rufy3	1
chr11	21507424	21507425	Mdh1	5		chr11	54761167	54761168	Hint1	1		chr5	92202465	92202466	G3bp2	6
chr11	21508470	21508471	Mdh1	4		chr11	55001090	55001091	Gm2a	1		chr5	92350327	92350328	Uso1	1
chr11	21508480	21508481	Mdh1	2		chr11	55001545	55001546	Gm2a	3		chr5	92590180	92590181	Scarb2	1
chr11	21955928	21955929	Ehbp1	1		chr11	55285520	55285521	Sparc	20		chr5	92590539	92590540	Scarb2	1
chr11	22784994	22784995	B3gnt2	1		chr11	55285527	55285528	Sparc	5		chr5	93330019	93330020	Ccni	27
chr11	22849861	22849862	Commd1	1		chr11	55285575	55285576	Sparc	1		chr5	98623505	98623506	Mir703	1
chr11	22923285	22923286	Zrsr1	1		chr11	55286664	55286665	Sparc	1		chr5	100216388	100216389	Enoph1	1
chr11	22924629	22924630	Zrsr1	2		chr11	55286678	55286679	Sparc	1		chr5	105420549	105420550	Gbp6	1
chr11	22924683	22924684	Zrsr1	1		chr11	55391001	55391002	G3bp1	2		chr5	105635055	105635056	Lrrc8b	8
chr11	22924713	22924714	Zrsr1	1		chr11	57373935	57373936	Fam114a2	2		chr5	105756673	105756674	Lrrc8c	1
chr11	22924721	22924722	Zrsr1	1		chr11	57374040	57374041	Fam114a2	3		chr5	106036505	106036506	Zfp326	1
chr11	22924731	22924732	Zrsr1	4		chr11	57421409	57421410	Mfap3	1		chr5	107657821	107657822	Btbd8	1
chr11	22924737	22924738	Zrsr1	4		chr11	57950177	57950178	Larp1	1		chr5	108051674	108051675	Rpl5	26
chr11	22950882	22950883	Cct4	2		chr11	57950180	57950181	Larp1	2		chr5	108271438	108271439	Tmed5	1
chr11	23206660	23206661	Xpo1	2		chr11	57950250	57950251	Larp1	2		chr5	108271476	108271477	Tmed5	1
chr11	23244628	23244629	Xpo1	3		chr11	57952512	57952513	Larp1	1		chr5	108581919	108581920	Atp5k	17
chr11	23246660	23246661	Xpo1	1		chr11	57952667	57952668	Larp1	1		chr5	111534996	111534997	Pitpnb	1
chr11	23246663	23246664	Xpo1	1		chr11	58074880	58074881	Gm12250	3		chr5	115049937	115049938	Oasl2	13
chr11	23246749	23246750	Xpo1	1		chr11	58098076	58098077	Igtp	1		chr5	115049992	115049993	Oasl2	10
chr11	23283523	23283524	Usp34	1		chr11	58098155	58098156	Igtp	10		chr5	115050153	115050154	Oasl2	1
chr11	23439987	23439988	Ahsa2	1		chr11	58098258	58098259	Igtp	54		chr5	115050161	115050162	Oasl2	38
chr11	23442278	23442279	Ahsa2	1		chr11	58105954	58105955	Irgm2	3		chr5	115436841	115436842	Dynll1	1
chr11	23599027	23599028	Pex13	3		chr11	58112599	58112600	Irgm2	1		chr5	115472359	115472360	Gatc	1
chr11	23599094	23599095	Pex13	1		chr11	58112713	58112714	Irgm2	4		chr5	116151969	116151970	Prkab1	1
chr11	23599097	23599098	Pex13	1		chr11	58113343	58113344	Irgm2	13		chr5	117412995	117412996	Taok3	1
chr11	26421532	26421533	Fancl	1		chr11	58113445	58113446	Irgm2	25		chr5	118148089	118148090	Fbxo21	1
chr11	26421664	26421665	Fancl	1		chr11	58113450	58113451	Irgm2	29		chr5	118902432	118902433	Med13l	1
chr11	28876510	28876511	Efemp1	1		chr11	59102422	59102423	Arf1	3		chr5	118903264	118903265	Med13l	1
chr11	29111515	29111516	Pnpt1	1		chr11	59102458	59102459	Arf1	16		chr5	120622907	120622908	Plbd2	1
chr11	29159336	29159337	Ppp4r3b	1		chr11	59102465	59102466	Arf1	14		chr5	121346547	121346548	Rpl6	1
chr11	29161173	29161174	Ppp4r3b	1		chr11	59102484	59102485	Arf1	50		chr5	121346625	121346626	Rpl6	253
chr11	29169467	29169468	Ppp4r3b	1		chr11	59102487	59102488	Arf1	14		chr5	121706014	121706015	Aldh2	1
chr11	29170482	29170483	Ppp4r3b	1		chr11	59102488	59102489	Arf1	2		chr5	122520629	122520630	Gpn3	2
chr11	29171778	29171779	Cfap36	1		chr11	59102515	59102516	Arf1	1		chr5	122594991	122594992	Atp2a2	1
chr11	29171804	29171805	Cfap36	1		chr11	59457534	59457535	Nlrp3	1		chr5	122595119	122595120	Atp2a2	3
chr11	29172799	29172800	Cfap36	1		chr11	59457537	59457538	Nlrp3	2		chr5	122595145	122595146	Atp2a2	1
chr11	29411015	29411016	Ccdc88a	1		chr11	59457541	59457542	Nlrp3	1		chr5	123510867	123510868	Bcl7a	2
chr11	29411764	29411765	Ccdc88a	1		chr11	59682862	59682863	Flcn	1		chr5	124389297	124389298	Mphosph9	1
chr11	29413179	29413180	Ccdc88a	1		chr11	59708871	59708872	Cops3	2		chr5	124688395	124688396	Tmed2	3
chr11	29413913	29413914	Ccdc88a	2		chr11	60117596	60117597	Tom1l2	1		chr5	125094395	125094396	Ncor2	1
chr11	29439647	29439648	Ccdc88a	1		chr11	60117705	60117706	Tom1l2	2		chr5	125532025	125532026	Bri3bp	1
chr11	29459049	29459050	Ccdc88a	1		chr11	60446086	60446087	Alkbh5	5		chr5	125594217	125594218	Aacs	1
chr11	29459085	29459086	Ccdc88a	1		chr11	60446452	60446453	Alkbh5	1		chr5	129866998	129866999	Cct6a	2
chr11	29463329	29463330	Prorsd1	1		chr11	60449101	60449102	Alkbh5	1		chr5	129875045	129875046	Cct6a	1
chr11	29496707	29496708	Rps27a	22		chr11	60755476	60755477	Tmem11	3		chr5	130274696	130274697	Sbds	6
chr11	29496711	29496712	Rps27a	29		chr11	61042893	61042894	Usp22	4		chr5	135093889	135093890	Dnajc30	1
chr11	29496714	29496715	Rps27a	3		chr11	61042920	61042921	Usp22	1		chr5	135227134	135227135	Baz1b	2
chr11	29656716	29656717	Rtn4	1		chr11	61042933	61042934	Usp22	13		chr5	135937770	135937771	Ywhag	3
chr11	29656960	29656961	Rtn4	4		chr11	61042935	61042936	Usp22	5		chr5	135937795	135937796	Ywhag	4
chr11	29657911	29657912	Rtn4	1		chr11	61135820	61135821	Aldh3a2	4		chr5	137780427	137780428	Mepce	1
chr11	29692537	29692538	Rtn4	1		chr11	61135917	61135918	Aldh3a2	3		chr5	138162095	138162096	Cops6	3
chr11	29692578	29692579	Rtn4	3		chr11	61135973	61135974	Aldh3a2	2		chr5	138961889	138961890	Pdgfa	1
chr11	29692579	29692580	Rtn4	5		chr11	61620622	61620623	Prpsap2	2		chr5	138961971	138961972	Pdgfa	3
chr11	29692583	29692584	Rtn4	1		chr11	61620859	61620860	Prpsap2	2		chr5	138962964	138962965	Pdgfa	1
chr11	29692689	29692690	Rtn4	13		chr11	61620866	61620867	Prpsap2	4		chr5	139255573	139255574	Get4	1
chr11	30049459	30049460	Sptbn1	4		chr11	61620869	61620870	Prpsap2	1		chr5	143491587	143491588	Rac1	24
chr11	30049671	30049672	Sptbn1	1		chr11	61666809	61666810	Ulk2	1		chr5	143492602	143492603	Rac1	6
chr11	30050063	30050064	Sptbn1	1		chr11	61667370	61667371	Ulk2	1		chr5	148441987	148441988	Ubl3	7
chr11	30050086	30050087	Sptbn1	1		chr11	61668069	61668070	Ulk2	1		chr6	4642706	4642707	Casd1	1
chr11	30050095	30050096	Sptbn1	1		chr11	62281837	62281838	Ncor1	1		chr6	11926807	11926808	Phf14	1
chr11	30060882	30060883	Sptbn1	1		chr11	62443765	62443766	Ubb	2		chr6	13088916	13088917	Tmem106b	1
chr11	30456078	30456079	Acyp2	1		chr11	62443772	62443773	Ubb	1		chr6	13870022	13870023	2610001J05Rik	6
chr11	30884714	30884715	Erlec1	1		chr11	62443792	62443793	Ubb	6		chr6	28426403	28426404	Arf5	1
chr11	30898141	30898142	Erlec1	1		chr11	62443795	62443796	Ubb	5		chr6	30211542	30211543	Ube2h	1
chr11	30901363	30901364	Erlec1	1		chr11	62443813	62443814	Ubb	1		chr6	31484666	31484667	Mkln1	1
chr11	30902637	30902638	Erlec1	1		chr11	62785583	62785584	Tvp23b	1		chr6	32769344	32769345	Chchd3	2
chr11	30902671	30902672	Erlec1	3		chr11	63050034	63050035	Pmp22	1		chr6	34373736	34373737	Akr1b10	2
chr11	31882300	31882301	Cpeb4	1		chr11	65579384	65579385	Map2k4	1		chr6	34373751	34373752	Akr1b10	3
chr11	31882339	31882340	Cpeb4	1		chr11	65580424	65580425	Map2k4	1		chr6	37783974	37783975	Atp6v0c-ps2	4
chr11	31883748	31883749	Cpeb4	2		chr11	65580474	65580475	Map2k4	1		chr6	38547516	38547517	Luc7l2	1
chr11	32696429	32696430	Fbxw11	1		chr11	67575526	67575527	Gas7	1		chr6	39779185	39779186	Mrps33	1
chr11	33102752	33102753	Npm1	4		chr11	67575537	67575538	Gas7	3		chr6	39779333	39779334	Mrps33	1
chr11	33102833	33102834	Npm1	21		chr11	68794085	68794086	Rpl26	1		chr6	40231888	40231889	Tmem178b	25
chr11	33110368	33110369	Npm1	5		chr11	68981537	68981538	Vamp2	1		chr6	47275968	47275969	Cntnap2	1
chr11	33110862	33110863	Npm1	1		chr11	69000704	69000705	Per1	3		chr6	47773295	47773296	Pdia4	1
chr11	40570399	40570400	Mat2b	1		chr11	69216406	69216407	Trappc1	1		chr6	49221150	49221151	Tra2a	2
chr11	40639521	40639522	Ccng1	1		chr11	69543788	69543789	Fxr2	2		chr6	50542549	50542550	Cycs	1
chr11	40639636	40639637	Ccng1	2		chr11	69543789	69543790	Fxr2	3		chr6	52523339	52523340	Hibadh	2
chr11	40639709	40639710	Ccng1	1		chr11	69543845	69543846	Fxr2	3		chr6	52723657	52723658	Tax1bp1	1
chr11	40640331	40640332	Ccng1	1		chr11	69555207	69555208	Cd68	1		chr6	56856117	56856118	Fkbp9	2
chr11	43311204	43311205	Pttg1	3		chr11	69555232	69555233	Cd68	6		chr6	56856239	56856240	Fkbp9	1
chr11	43311965	43311966	Pttg1	1		chr11	69555259	69555260	Cd68	3		chr6	56859639	56859640	Nt5c3	2
chr11	43334181	43334182	Slu7	1		chr11	69555264	69555265	Cd68	1		chr6	67261107	67261108	Serbp1	4
chr11	46084837	46084838	Cyfip2	2		chr11	69557983	69557984	Eif4a1	23		chr6	71261377	71261378	Krcc1	2
chr11	46331451	46331452	Med7	2		chr11	69557987	69557988	Eif4a1	5		chr6	71262052	71262053	Krcc1	3
chr11	46332169	46332170	Med7	1		chr11	69558013	69558014	Eif4a1	7		chr6	71369009	71369010	Rmnd5a	1
chr11	46371764	46371765	Havcr2	1		chr11	69558038	69558039	Eif4a1	4		chr6	71538028	71538029	Chmp3	1
chr11	48695031	48695032	Rack1	4		chr11	69558044	69558045	Eif4a1	27		chr6	71787424	71787425	Reep1	1
chr11	48695083	48695084	Rack1	2		chr11	69558045	69558046	Eif4a1	36		chr6	72295800	72295801	Usp39	1
chr11	48697470	48697471	Trim41	1		chr11	69558046	69558047	Eif4a1	21		chr6	72410048	72410049	Mat2a	1
chr11	48756096	48756097	Irgm1	1		chr11	69558047	69558048	Eif4a1	35		chr6	72417302	72417303	Particl	1
chr11	48756312	48756313	Irgm1	1		chr11	69558048	69558049	Eif4a1	21		chr6	72585769	72585770	Tgoln1	1
chr11	48756608	48756609	Irgm1	2		chr11	69558049	69558050	Eif4a1	23		chr6	76858835	76858836	Ctnna2	32
chr11	48756716	48756717	Irgm1	1		chr11	69558050	69558051	Eif4a1	25		chr6	76858938	76858939	Ctnna2	7
chr11	48756725	48756726	Irgm1	1		chr11	69558051	69558052	Eif4a1	6		chr6	85907101	85907102	Tprkb	1
chr11	48756768	48756769	Irgm1	1		chr11	69564014	69564015	Senp3	1		chr6	86363744	86363745	Pcyox1	1
chr11	48877662	48877663	Tgtp1	1		chr11	69625169	69625170	Polr2a	1		chr6	88080720	88080721	Rpn1	6
chr11	48877982	48877983	Tgtp1	3		chr11	69625170	69625171	Polr2a	1		chr6	91732164	91732165	Slc6a6	2
chr11	48882840	48882841	Tgtp1	1		chr11	69672506	69672507	Zbtb4	1		chr6	91735722	91735723	Slc6a6	2
chr11	48882856	48882857	Tgtp1	1		chr11	69741781	69741782	Plscr3	1		chr6	93659331	93659332	Magi1	1
chr11	48882876	48882877	Tgtp1	1		chr11	69807261	69807262	Gps2	1		chr6	97161252	97161253	Uba3	2
chr11	48882912	48882913	Tgtp1	1		chr11	69807289	69807290	Gps2	1		chr6	113301726	113301727	Brpf1	4
chr11	48949381	48949382	Tgtp2	2		chr11	69807630	69807631	Eif5a	1		chr6	113424912	113424913	Jagn1	1
chr11	48949851	48949852	Tgtp2	1		chr11	69885433	69885434	Gabarap	4		chr6	113705175	113705176	Sec13	5
chr11	48949913	48949914	Tgtp2	2		chr11	69885462	69885463	Gabarap	1		chr6	114294235	114294236	Slc6a1	3
chr11	48954883	48954884	Tgtp2	2		chr11	69885541	69885542	Gabarap	9		chr6	114294237	114294238	Slc6a1	2
chr11	48987591	48987592	Ifi47	6		chr11	69885543	69885544	Gabarap	28		chr6	115995813	115995814	Tmcc1	3
chr11	49153594	49153595	Mgat1	1		chr11	69885545	69885546	Gabarap	7		chr6	115998528	115998529	Tmcc1	1
chr11	49562365	49562366	Cnot6	1		chr11	69885554	69885555	Gabarap	15		chr6	115998550	115998551	Tmcc1	11
chr11	49774431	49774432	Mapk9	1		chr11	69885565	69885566	Gabarap	26		chr6	115998932	115998933	Tmcc1	1
chr11	49961998	49961999	Rnf130	1		chr11	69890424	69890425	Phf23	1		chr6	116610750	116610751	Rassf4	1
chr11	49962225	49962226	Rnf130	2		chr11	69890433	69890434	Phf23	3		chr6	117151223	117151224	Cxcl12	2
chr11	49986752	49986753	Rnf130	2		chr11	70129027	70129028	Rnasek	4		chr6	119902810	119902811	Wnk1	1
chr11	49986804	49986805	Rnf130	1		chr11	70129130	70129131	Rnasek	4		chr6	119969423	119969424	Wnk1	1
chr11	49990106	49990107	Rnf130	2		chr11	70129196	70129197	Rnasek	3		chr6	122865660	122865661	Necap1	2
chr11	49990113	49990114	Rnf130	3		chr11	70505116	70505117	Mink1	2		chr6	124680962	124680963	Lpcat3	3
chr11	49990124	49990125	Rnf130	6		chr11	70505118	70505119	Mink1	2		chr6	124979890	124979891	Pianp	4
chr11	49990127	49990128	Rnf130	10		chr11	70505119	70505120	Mink1	8		chr6	126713928	126713929	Kcna6	3
chr11	49995474	49995475	Rnf130	2		chr11	70505124	70505125	Mink1	5		chr6	129518985	129518986	Gabarapl1	2
chr11	50091253	50091254	Sqstm1	15		chr11	70535277	70535278	Slc25a11	1		chr6	133082914	133082915	Smim10l1	1
chr11	50091282	50091283	Sqstm1	12		chr11	70535488	70535489	Slc25a11	1		chr6	133083485	133083486	Smim10l1	9
chr11	50091284	50091285	Sqstm1	32		chr11	70541990	70541991	Rnf167	1		chr6	134902153	134902154	Cdkn1b	2
chr11	50091287	50091288	Sqstm1	36		chr11	70542889	70542890	Pfn1	8		chr6	136790824	136790825	Wbp11	14
chr11	50091312	50091313	Sqstm1	5		chr11	70542905	70542906	Pfn1	9		chr6	137728360	137728361	Strap	1
chr11	50091314	50091315	Sqstm1	2		chr11	70542907	70542908	Pfn1	27		chr6	146451369	146451370	Ints13	1
chr11	50185381	50185382	Canx	2		chr11	70542913	70542914	Pfn1	1		chr7	3708882	3708883	Rps9	1
chr11	50185393	50185394	Canx	1		chr11	70542921	70542922	Pfn1	2		chr7	3708907	3708908	Rps9	81
chr11	50185444	50185445	Canx	1		chr11	70542925	70542926	Pfn1	1		chr7	3709655	3709656	Rps9	37
chr11	50185499	50185500	Canx	1		chr11	70542926	70542927	Pfn1	3		chr7	3709678	3709679	Rps9	6
chr11	50185890	50185891	Canx	2		chr11	70542929	70542930	Pfn1	1		chr7	3709732	3709733	Rps9	3
chr11	50185991	50185992	Canx	5		chr11	70542930	70542931	Pfn1	4		chr7	4150924	4150925	Leng8	3
chr11	50186017	50186018	Canx	4		chr11	70542932	70542933	Pfn1	2		chr7	5082669	5082670	U2af2	1
chr11	50186021	50186022	Canx	1		chr11	70554683	70554684	Spag7	1		chr7	16171363	16171364	Zc3h4	1
chr11	50186033	50186034	Canx	1		chr11	70833543	70833544	Rabep1	2		chr7	16296551	16296552	Arhgap35	1
chr11	50186036	50186037	Canx	3		chr11	70834719	70834720	Nup88	1		chr7	19036664	19036665	Fosb	1
chr11	50186047	50186048	Canx	2		chr11	72100344	72100345	Txndc17	2		chr7	19036967	19036968	Fosb	4
chr11	50186052	50186053	Canx	13		chr11	72202867	72202868	Xaf1	1		chr7	23646295	23646296	Atp5g2	38
chr11	50186054	50186055	Canx	14		chr11	72575298	72575299	Ube2g1	1		chr7	24993446	24993447	Cic	5
chr11	50186056	50186057	Canx	10		chr11	72668813	72668814	Cyb5d2	1		chr7	27450896	27450897	Zfp60	1
chr11	50186057	50186058	Canx	3		chr11	73074618	73074619	Ctns	2		chr7	27450917	27450918	Zfp60	1
chr11	50186058	50186059	Canx	6		chr11	73210680	73210681	Aspa	10		chr7	28076466	28076467	Zfp36	45
chr11	50186090	50186091	Canx	7		chr11	73215146	73215147	Aspa	4		chr7	29806847	29806848	Zfp260	1
chr11	50186147	50186148	Canx	1		chr11	74565497	74565498	Pafah1b1	1		chr7	30006417	30006418	Clip3	11
chr11	50186177	50186178	Canx	1		chr11	74567617	74567618	Pafah1b1	2		chr7	30006594	30006595	Clip3	2
chr11	50186592	50186593	Canx	1		chr11	74567741	74567742	Pafah1b1	10		chr7	30134664	30134665	Aplp1	45
chr11	50187005	50187006	Canx	1		chr11	74567746	74567747	Pafah1b1	2		chr7	30134668	30134669	Aplp1	28
chr11	50188207	50188208	Canx	1		chr11	74568461	74568462	Pafah1b1	2		chr7	30134672	30134673	Aplp1	37
chr11	50198423	50198424	Canx	1		chr11	74570404	74570405	Pafah1b1	1		chr7	30134713	30134714	Aplp1	293
chr11	50198460	50198461	Canx	2		chr11	74590315	74590316	Pafah1b1	3		chr7	37962528	37962529	Pop4	2
chr11	50198469	50198470	Canx	1		chr11	74590335	74590336	Pafah1b1	2		chr7	43481238	43481239	Klk6	1
chr11	50198474	50198475	Canx	3		chr11	74708671	74708672	Mettl16	1		chr7	43481240	43481241	Klk6	8
chr11	50198479	50198480	Canx	5		chr11	74736289	74736290	Mnt	2		chr7	44112693	44112694	Lrrc4b	73
chr11	50201209	50201210	Canx	1		chr11	74736312	74736313	Mnt	1		chr7	44772320	44772321	Rps11	26
chr11	50202585	50202586	Canx	1		chr11	75067106	75067107	Ovca2	1		chr7	45071387	45071388	Ruvbl2	2
chr11	50280340	50280341	Rufy1	1		chr11	75517196	75517197	Pitpna	1		chr7	45107553	45107554	Ftl1	33
chr11	51491218	51491219	Hnrnpab	1		chr11	75517218	75517219	Pitpna	1		chr7	55881101	55881102	Herc2	1
chr11	51491934	51491935	Hnrnpab	1		chr11	75517406	75517407	Pitpna	1		chr7	55881124	55881125	Herc2	1
chr11	51492061	51492062	Phykpl	3		chr11	75517418	75517419	Pitpna	2		chr7	58938515	58938516	Ube3a	2
chr11	51492075	51492076	Hnrnpab	1		chr11	75595802	75595803	Crk	1		chr7	58956372	58956373	Ube3a	1
chr11	51492105	51492106	Hnrnpab	3		chr11	75596012	75596013	Crk	2		chr7	63536246	63536247	Klf13	42
chr11	51576294	51576295	0610009B22Rik	1		chr11	75596471	75596472	Crk	1		chr7	66884019	66884020	Mef2a	1
chr11	51576547	51576548	0610009B22Rik	1		chr11	75596811	75596812	Crk	1		chr7	66884137	66884138	Mef2a	2
chr11	51682491	51682492	Sar1b	2		chr11	75647773	75647774	Ywhae	2		chr7	66884250	66884251	Mef2a	2
chr11	51682542	51682543	Sar1b	1		chr11	75647798	75647799	Ywhae	1		chr7	67380567	67380568	Synm	1
chr11	51682580	51682581	Sar1b	1		chr11	75655551	75655552	Ywhae	3		chr7	67876392	67876393	Igf1r	1
chr11	51704511	51704512	Jade2	1		chr11	75655772	75655773	Ywhae	14		chr7	67876513	67876514	Igf1r	1
chr11	51876449	51876450	Ube2b	1		chr11	75656138	75656139	Ywhae	76		chr7	67882852	67882853	Igf1r	1
chr11	51876488	51876489	Ube2b	3		chr11	75656139	75656140	Ywhae	98		chr7	80997086	80997087	Cpeb1	1
chr11	51876497	51876498	Ube2b	2		chr11	75656140	75656141	Ywhae	171		chr7	81110327	81110328	Ap3b2	1
chr11	51876896	51876897	Ube2b	1		chr11	75656141	75656142	Ywhae	103		chr7	81442086	81442087	Btbd1	4
chr11	51876919	51876920	Ube2b	1		chr11	75656142	75656143	Ywhae	151		chr7	81533985	81533986	Hdgfl3	2
chr11	51876941	51876942	Ube2b	1		chr11	75656144	75656145	Ywhae	62		chr7	81533987	81533988	Hdgfl3	1
chr11	51877209	51877210	Ube2b	5		chr11	75656186	75656187	Ywhae	2		chr7	81534931	81534932	Hdgfl3	1
chr11	51877237	51877238	Ube2b	1		chr11	75656212	75656213	Ywhae	66		chr7	83548140	83548141	Mesd	9
chr11	51877425	51877426	Ube2b	1		chr11	75656213	75656214	Ywhae	62		chr7	83548155	83548156	Mesd	10
chr11	51877460	51877461	Ube2b	1		chr11	75656215	75656216	Ywhae	80		chr7	83548243	83548244	Mesd	1
chr11	51879444	51879445	Ube2b	1		chr11	75656262	75656263	Ywhae	106		chr7	83548249	83548250	Mesd	8
chr11	52013127	52013128	Ppp2ca	1		chr11	75937266	75937267	Vps53	1		chr7	98536049	98536050	Uvrag	1
chr11	52013240	52013241	Ppp2ca	1		chr11	76669321	76669322	Cpd	8		chr7	99493979	99493980	Spcs2	2
chr11	52013244	52013245	Ppp2ca	1		chr11	76670591	76670592	Cpd	4		chr7	101887461	101887462	Pgap2	1
chr11	52013310	52013311	Ppp2ca	3		chr11	76672677	76672678	Cpd	3		chr7	105020730	105020731	Fam160a2	1
chr11	52013311	52013312	Ppp2ca	2		chr11	76673069	76673070	Cpd	27		chr7	109335330	109335331	Tmem9b	2
chr11	52013312	52013313	Ppp2ca	1		chr11	76673077	76673078	Cpd	3		chr7	109335338	109335339	Tmem9b	11
chr11	52013313	52013314	Ppp2ca	1		chr11	76673105	76673106	Cpd	1		chr7	109335344	109335345	Tmem9b	3
chr11	52013322	52013323	Ppp2ca	2		chr11	76673172	76673173	Cpd	2		chr7	109655730	109655731	Ipo7	2
chr11	52127725	52127726	Skp1	1		chr11	76673180	76673181	Cpd	3		chr7	110670240	110670241	Eif4g2	3
chr11	52127743	52127744	Skp1	2		chr11	76673181	76673182	Cpd	5		chr7	110673425	110673426	Eif4g2	1
chr11	52127748	52127749	Skp1	1		chr11	76699608	76699609	Cpd	1		chr7	115704169	115704170	1110004F10Rik	2
chr11	52137029	52137030	Skp1	1		chr11	76699609	76699610	Cpd	1		chr7	117718377	117718378	Arl6ip1	1
chr11	52251975	52251976	Vdac1	1		chr11	76731313	76731314	Cpd	1		chr7	117718971	117718972	Arl6ip1	2
chr11	52280093	52280094	Vdac1	1		chr11	77428709	77428710	Taok1	1		chr7	117718985	117718986	Arl6ip1	5
chr11	53150684	53150685	Hspa4	1		chr11	77466409	77466410	Taok1	1		chr7	117719278	117719279	Arl6ip1	31
chr11	53175011	53175012	Hspa4	1		chr11	77601208	77601209	Nufip2	1		chr7	117719336	117719337	Arl6ip1	3
chr11	53311612	53311613	Aff4	2		chr11	77602658	77602659	Nufip2	1		chr7	117719339	117719340	Arl6ip1	6
chr11	53311789	53311790	Aff4	1		chr11	77608490	77608491	Nufip2	1		chr7	117776132	117776133	Smg1	1
chr11	53475112	53475113	Kif3a	1		chr11	77756544	77756545	Myo18a	1		chr7	118287877	118287878	Gde1	9
chr11	53492516	53492517	Kif3a	2		chr11	77920972	77920973	Phf12	1		chr7	118287910	118287911	Gde1	1
chr11	53492518	53492519	Kif3a	1		chr11	77920983	77920984	Dhrs13os	1		chr7	122233324	122233325	Prkcb	1
chr11	53492521	53492522	Kif3a	1		chr11	77921254	77921255	Phf12	1		chr7	122233393	122233394	Prkcb	6
chr11	53589013	53589014	Rad50	1		chr11	77921315	77921316	Phf12	1		chr7	125701038	125701039	Xpo6	5
chr11	53667917	53667918	Irf1	2		chr11	78047181	78047182	Fam222b	1		chr7	126091092	126091093	Atxn2l	2
chr11	53667920	53667921	Irf1	2		chr11	78072412	78072413	Rpl23a	1		chr7	126621455	126621456	Maz	1
chr11	54407449	54407450	Fnip1	1		chr11	78181145	78181146	2610507B11Rik	4		chr7	128041688	128041689	Tial1	2
chr11	54407489	54407490	Fnip1	1		chr11	78217444	78217445	Aldoc	3		chr7	128041748	128041749	Tial1	2
chr11	54608364	54608365	Cdc42se2	1		chr11	78233292	78233293	Pigs	2		chr7	128041807	128041808	Tial1	1
chr11	54761318	54761319	Hint1	1		chr11	78415366	78415367	Tnfaip1	1		chr7	130366254	130366255	Tacc2	1
chr11	55000570	55000571	Gm2a	2		chr11	78430792	78430793	Ift20	1		chr7	131046187	131046188	Acadsb	3
chr11	55001542	55001543	Gm2a	47		chr11	78432465	78432466	Ift20	1		chr7	131046212	131046213	Acadsb	4
chr11	55001545	55001546	Gm2a	38		chr11	78458347	78458348	Nlk	2		chr7	131046254	131046255	Acadsb	3
chr11	55001648	55001649	Gm2a	6		chr11	78459095	78459096	Nlk	1		chr7	131046305	131046306	Acadsb	2
chr11	55126921	55126922	Slc36a1	2		chr11	78459147	78459148	Nlk	1		chr7	132476683	132476684	Abraxas2	4
chr11	55285520	55285521	Sparc	30		chr11	79405887	79405888	Evi2	1		chr7	132589628	132589629	Ctbp2	1
chr11	55285521	55285522	Sparc	23		chr11	79417515	79417516	Evi2a	3		chr7	133322890	133322891	Dhx32	1
chr11	55285522	55285523	Sparc	48		chr11	79471270	79471271	Nf1	1		chr7	136795656	136795657	Ebf3	1
chr11	55285524	55285525	Sparc	43		chr11	79826222	79826223	Utp6	1		chr7	137066176	137066177	Glrx3	2
chr11	55285525	55285526	Sparc	30		chr11	79937678	79937679	Crlf3	1		chr7	138492891	138492892	Bnip3	2
chr11	55285575	55285576	Sparc	6		chr11	80134277	80134278	Rhot1	1		chr7	139685928	139685929	Echs1	1
chr11	55286675	55286676	Sparc	5		chr11	80157333	80157334	Rhot1	1		chr7	140843221	140843222	Irf7	4
chr11	55390758	55390759	G3bp1	1		chr11	80157339	80157340	Rhot1	6		chr7	143086089	143086090	Nap1l4	17
chr11	55390787	55390788	G3bp1	2		chr11	80157420	80157421	Rhot1	1		chr7	143989586	143989587	Cttn	2
chr11	55391001	55391002	G3bp1	1		chr11	80157423	80157424	Rhot1	2		chr7	143989638	143989639	Cttn	2
chr11	55391006	55391007	G3bp1	1		chr11	80274259	80274260	Zfp207	1		chr7	143989850	143989851	Cttn	2
chr11	55391020	55391021	G3bp1	1		chr11	80276773	80276774	Zfp207	3		chr8	11563177	11563178	Naxd	1
chr11	57373882	57373883	Fam114a2	2		chr11	80362314	80362315	Psmd11	1		chr8	12918235	12918236	Atp11a	3
chr11	57374040	57374041	Fam114a2	2		chr11	80362323	80362324	Psmd11	3		chr8	12918505	12918506	Atp11a	1
chr11	57421466	57421467	Mfap3	1		chr11	80362324	80362325	Psmd11	2		chr8	13306167	13306168	Dcun1d2	1
chr11	57950180	57950181	Larp1	1		chr11	80362358	80362359	Psmd11	1		chr8	13428173	13428174	Tfdp1	1
chr11	57950183	57950184	Larp1	1		chr11	80362404	80362405	Psmd11	1		chr8	22952921	22952922	Smim19	2
chr11	57950245	57950246	Larp1	1		chr11	81993967	81993968	Ccl12	1		chr8	23717116	23717117	Gins4	1
chr11	57952563	57952564	Larp1	1		chr11	82694966	82694967	Rffl	5		chr8	26257451	26257452	Bag4	1
chr11	57952778	57952779	Larp1	3		chr11	82854521	82854522	Slfn5	1		chr8	26434703	26434704	Hgsnat	1
chr11	58009270	58009271	Cnot8	1		chr11	82855429	82855430	Slfn5	1		chr8	31586920	31586921	Dusp26	2
chr11	58079957	58079958	Gm12250	1		chr11	82871424	82871425	Slfn9	1		chr8	31727482	31727483	Fut10	1
chr11	58079995	58079996	Gm12250	1		chr11	82871443	82871444	Slfn9	1		chr8	34109545	34109546	Ppp2cb	2
chr11	58098003	58098004	Igtp	1		chr11	83182824	83182825	AA465934	1		chr8	34604632	34604633	Leprotl1	3
chr11	58098173	58098174	Igtp	1		chr11	83416629	83416630	Ccl5	1		chr8	34637698	34637699	Saraf	13
chr11	58098186	58098187	Igtp	1		chr11	83416647	83416648	Ccl5	1		chr8	36146396	36146397	Mfhas1	1
chr11	58112698	58112699	Irgm2	1		chr11	83416721	83416722	Ccl5	20		chr8	36614664	36614665	Prag1	1
chr11	58113267	58113268	Irgm2	4		chr11	83416759	83416760	Ccl5	11		chr8	39618245	39618246	Tusc3	1
chr11	58823266	58823267	Rnf187	2		chr11	83416782	83416783	Ccl5	2		chr8	40058177	40058178	Msr1	3
chr11	58823282	58823283	Rnf187	1		chr11	83416789	83416790	Ccl5	3		chr8	40945730	40945731	Cnot7	1
chr11	59066620	59066621	Gjc2	1		chr11	83416867	83416868	Ccl5	4		chr8	40945764	40945765	Cnot7	1
chr11	59101421	59101422	2310033P09Rik	1		chr11	83416870	83416871	Ccl5	4		chr8	45505009	45505010	Fat1	9
chr11	59102334	59102335	Arf1	11		chr11	83416871	83416872	Ccl5	3		chr8	45505059	45505060	Fat1	4
chr11	59102346	59102347	Arf1	3		chr11	83416879	83416880	Ccl5	1		chr8	46660324	46660325	Slc25a4	4
chr11	59102353	59102354	Arf1	4		chr11	83419983	83419984	Ccl5	3		chr8	46660480	46660481	Slc25a4	4
chr11	59102381	59102382	Arf1	4		chr11	83420031	83420032	Ccl5	3		chr8	46988920	46988921	Acsl1	8
chr11	59102422	59102423	Arf1	9		chr11	83420077	83420078	Ccl5	2		chr8	46988923	46988924	Acsl1	5
chr11	59102449	59102450	Arf1	5		chr11	83420080	83420081	Ccl5	1		chr8	47639144	47639145	Stox2	1
chr11	59102452	59102453	Arf1	5		chr11	83421231	83421232	Ccl5	1		chr8	47639180	47639181	Stox2	1
chr11	59102458	59102459	Arf1	16		chr11	83538802	83538803	Ccl3	1		chr8	54973865	54973866	Spcs3	1
chr11	59102484	59102485	Arf1	34		chr11	83538932	83538933	Ccl3	1		chr8	57978954	57978955	Galnt7	6
chr11	59102487	59102488	Arf1	16		chr11	83555307	83555308	Ccl4	1		chr8	65045812	65045813	Cpe	1
chr11	59682632	59682633	Flcn	2		chr11	83555312	83555313	Ccl4	1		chr8	65045820	65045821	Cpe	3
chr11	59682817	59682818	Flcn	1		chr11	83853399	83853400	Ddx52	1		chr8	65193187	65193188	Klhl2	14
chr11	60089671	60089672	Rai1	1		chr11	83935231	83935232	Synrg	1		chr8	66922797	66922798	Marchf1	1
chr11	60089792	60089793	Rai1	1		chr11	84723554	84723555	Ggnbp2	4		chr8	67342964	67342965	Naf1	2
chr11	60748873	60748874	Dhrs7b	2		chr11	84723720	84723721	Ggnbp2	1		chr8	68145288	68145289	Psd3	2
chr11	60755386	60755387	Tmem11	2		chr11	84728707	84728708	Ggnbp2	1		chr8	70214225	70214226	Zfp866	1
chr11	60755476	60755477	Tmem11	2		chr11	84913615	84913616	Usp32	1		chr8	70961955	70961956	Uba52	59
chr11	60755481	60755482	Tmem11	1		chr11	86099626	86099627	Brip1os	1		chr8	71153132	71153133	Jund	98
chr11	61042744	61042745	Usp22	2		chr11	86100035	86100036	Brip1os	1		chr8	71210919	71210920	Rab3a	1
chr11	61042905	61042906	Usp22	2		chr11	86100154	86100155	Brip1os	1		chr8	73320996	73320997	Smim7	1
chr11	61042933	61042934	Usp22	1		chr11	86100180	86100181	Brip1os	5		chr8	78322940	78322941	Tmem184c	8
chr11	61042934	61042935	Usp22	2		chr11	86158303	86158304	Med13	4		chr8	79232027	79232028	Rbmxl1	1
chr11	61135793	61135794	Aldh3a2	1		chr11	86189401	86189402	Med13	1		chr8	80066134	80066135	Smad1	8
chr11	61135814	61135815	Aldh3a2	2		chr11	86393594	86393595	Rps6kb1	1		chr8	80066172	80066173	Smad1	5
chr11	61135854	61135855	Aldh3a2	1		chr11	86393626	86393627	Rps6kb1	2		chr8	80066248	80066249	Smad1	8
chr11	61135862	61135863	Aldh3a2	3		chr11	86475666	86475667	Vmp1	17		chr8	81491283	81491284	Gab1	1
chr11	61135867	61135868	Aldh3a2	8		chr11	86475694	86475695	Vmp1	92		chr8	84161293	84161294	Scoc	1
chr11	61135917	61135918	Aldh3a2	1		chr11	86475697	86475698	Vmp1	28		chr8	84161957	84161958	Scoc	4
chr11	61135922	61135923	Aldh3a2	1		chr11	86475698	86475699	Vmp1	70		chr8	84161964	84161965	Scoc	3
chr11	61135982	61135983	Aldh3a2	1		chr11	86475701	86475702	Vmp1	25		chr8	84162103	84162104	Scoc	4
chr11	61620622	61620623	Prpsap2	1		chr11	86585629	86585630	Cltc	26		chr8	85431456	85431457	Nfix	5
chr11	61620859	61620860	Prpsap2	1		chr11	86585637	86585638	Cltc	3		chr8	85987231	85987232	Vps35	11
chr11	61620860	61620861	Prpsap2	2		chr11	86585737	86585738	Cltc	17		chr8	85987276	85987277	Vps35	13
chr11	61666758	61666759	Ulk2	1		chr11	86585746	86585747	Cltc	3		chr8	86445438	86445439	Itfg1	1
chr11	61667273	61667274	Ulk2	1		chr11	86586131	86586132	Cltc	6		chr8	89474974	89474975	Cyld	2
chr11	62030306	62030307	Specc1	1		chr11	86586154	86586155	Cltc	2		chr8	91833817	91833818	Rbl2	1
chr11	62208589	62208590	Ncor1	1		chr11	86586158	86586159	Cltc	1		chr8	91850229	91850230	Aktip	1
chr11	62280611	62280612	Ncor1	1		chr11	86586167	86586168	Cltc	2		chr8	91850419	91850420	Rbl2	1
chr11	62283469	62283470	Ncor1	1		chr11	86586192	86586193	Cltc	6		chr8	94690152	94690153	Gnao1	4
chr11	62294661	62294662	Ncor1	1		chr11	86932628	86932629	Gdpd1	1		chr8	94693686	94693687	Gnao1	1
chr11	62295249	62295250	Ncor1	1		chr11	86932719	86932720	Gdpd1	2		chr8	94695714	94695715	Gnao1	7
chr11	62443792	62443793	Ubb	1		chr11	87973997	87973998	Vezf1	2		chr8	96552563	96552564	Sap18b	1
chr11	62443795	62443796	Ubb	2		chr11	87974002	87974003	Vezf1	2		chr8	96552623	96552624	Sap18b	3
chr11	62443799	62443800	Ubb	2		chr11	87975400	87975401	Vezf1	2		chr8	105144530	105144531	Dync1li2	14
chr11	62443838	62443839	Ubb	2		chr11	88234874	88234875	Msi2	12		chr8	105144602	105144603	Dync1li2	1
chr11	62443865	62443866	Ubb	7		chr11	88815089	88815090	Scpep1	2		chr8	106251292	106251293	Atp6v0d1	3
chr11	62443867	62443868	Ubb	3		chr11	88815090	88815091	Scpep1	1		chr8	106583385	106583386	Thap11	2
chr11	62785682	62785683	Tvp23b	1		chr11	88815092	88815093	Scpep1	1		chr8	107796136	107796137	Terf2	1
chr11	63049591	63049592	Pmp22	1		chr11	93842758	93842759	Nme2	1		chr8	110453386	110453387	Atxn1l	1
chr11	66928950	66928951	Adprm	1		chr11	93842764	93842765	Nme2	1		chr8	110453396	110453397	Atxn1l	1
chr11	66929252	66929253	Adprm	1		chr11	93842765	93842766	Nme2	7		chr8	110588727	110588728	Ap1g1	2
chr11	67575463	67575464	Gas7	1		chr11	93850086	93850087	Nme1	2		chr8	110588781	110588782	Ap1g1	1
chr11	67575524	67575525	Gas7	1		chr11	93850175	93850176	Nme1	2		chr8	111537323	111537324	Sf3b3	1
chr11	67575530	67575531	Gas7	1		chr11	93850265	93850266	Nme1	3		chr8	111537381	111537382	Sf3b3	1
chr11	67575537	67575538	Gas7	1		chr11	94105255	94105256	Tob1	2		chr8	111698289	111698290	St3gal2	1
chr11	67575541	67575542	Gas7	1		chr11	94105322	94105323	Tob1	3		chr8	111701766	111701767	Ddx19a	1
chr11	67577323	67577324	Gas7	1		chr11	94105415	94105416	Tob1	1		chr8	111701837	111701838	Ddx19a	1
chr11	68000125	68000126	Stx8	2		chr11	94182224	94182225	Luc7l3	2		chr8	111701847	111701848	Ddx19a	3
chr11	68794085	68794086	Rpl26	9		chr11	94188726	94188727	Luc7l3	7		chr8	111701848	111701849	Ddx19a	1
chr11	68981574	68981575	Vamp2	1		chr11	94190782	94190783	Luc7l3	4		chr8	111701900	111701901	Ddx19a	2
chr11	68981577	68981578	Vamp2	1		chr11	94192354	94192355	Luc7l3	1		chr8	111884208	111884209	Glg1	6
chr11	68981619	68981620	Vamp2	1		chr11	94197048	94197049	Luc7l3	3		chr8	111884213	111884214	Glg1	3
chr11	68981622	68981623	Vamp2	1		chr11	94232444	94232445	Ankrd40	2		chr8	111884247	111884248	Glg1	4
chr11	68983143	68983144	Vamp2	2		chr11	94534506	94534507	Lrrc59	1		chr8	112350050	112350051	Znrf1	1
chr11	69216342	69216343	Trappc1	1		chr11	94535816	94535817	Lrrc59	1		chr8	112679260	112679261	Gabarapl2	26
chr11	69287179	69287180	Naa38	1		chr11	94550810	94550811	Mrpl27	3		chr8	118186815	118186816	Cmip	1
chr11	69287356	69287357	Tmem88	1		chr11	94897242	94897243	Ppp1r9b	1		chr8	118187496	118187497	Cmip	2
chr11	69445210	69445211	Efnb3	1		chr11	94917298	94917299	Pdk2	1		chr8	118187556	118187557	Cmip	4
chr11	69543789	69543790	Fxr2	1		chr11	95165330	95165331	Kat7	2		chr8	120234981	120234982	Mbtps1	6
chr11	69557949	69557950	Eif4a1	2		chr11	95281408	95281409	Slc35b1	1		chr8	120684168	120684169	Usp10	2
chr11	69557983	69557984	Eif4a1	11		chr11	95281412	95281413	Slc35b1	2		chr8	121308004	121308005	Gse1	2
chr11	69558010	69558011	Eif4a1	7		chr11	95282519	95282520	Slc35b1	2		chr8	122323603	122323604	Map1lc3b	3
chr11	69558012	69558013	Eif4a1	1		chr11	95383106	95383107	Spop	4		chr8	122325659	122325660	Zcchc14	3
chr11	69558013	69558014	Eif4a1	4		chr11	95383200	95383201	Spop	1		chr8	122325662	122325663	Zcchc14	1
chr11	69558044	69558045	Eif4a1	15		chr11	95383204	95383205	Spop	2		chr8	122327328	122327329	Zcchc14	6
chr11	69558045	69558046	Eif4a1	13		chr11	95383234	95383235	Spop	1		chr8	122327363	122327364	Zcchc14	5
chr11	69558046	69558047	Eif4a1	20		chr11	95383238	95383239	Spop	2		chr8	123770242	123770243	2810013P06Rik	1
chr11	69558047	69558048	Eif4a1	21		chr11	95383696	95383697	Spop	1		chr8	125072193	125072194	Galnt2	8
chr11	69558048	69558049	Eif4a1	31		chr11	95383769	95383770	Spop	1		chr8	125637189	125637190	Egln1	2
chr11	69558049	69558050	Eif4a1	23		chr11	95384082	95384083	Spop	1		chr8	126465638	126465639	Ntpcr	1
chr11	69558050	69558051	Eif4a1	9		chr11	95939486	95939487	Ube2z	2		chr8	127151872	127151873	Coa6	1
chr11	69558051	69558052	Eif4a1	2		chr11	95939487	95939488	Ube2z	1		chr8	127151940	127151941	Coa6	4
chr11	69625095	69625096	Polr2a	1		chr11	96698737	96698738	Cbx1	1		chr8	127151958	127151959	Coa6	6
chr11	69625096	69625097	Polr2a	1		chr11	96844376	96844377	Sp2	4		chr8	127661649	127661650	Tomm20	2
chr11	69625170	69625171	Polr2a	1		chr11	96844753	96844754	Sp2	1		chr9	4418028	4418029	Gria4	2
chr11	69672506	69672507	Zbtb4	1		chr11	97053333	97053334	Kpnb1	1		chr9	4418144	4418145	Gria4	10
chr11	69807289	69807290	Gps2	2		chr11	97053497	97053498	Kpnb1	1		chr9	4418182	4418183	Gria4	2
chr11	69807771	69807772	Eif5a	2		chr11	97053498	97053499	Kpnb1	1		chr9	4418283	4418284	Gria4	1
chr11	69881383	69881384	Ctdnep1	2		chr11	97096868	97096869	Npepps	5		chr9	7818384	7818385	Birc2	1
chr11	69885405	69885406	Gabarap	2		chr11	97096916	97096917	Npepps	3		chr9	14266871	14266872	Endod1	6
chr11	69885415	69885416	Gabarap	2		chr11	97097657	97097658	Npepps	9		chr9	14266921	14266922	Endod1	2
chr11	69885433	69885434	Gabarap	2		chr11	97576027	97576028	Mllt6	3		chr9	14421543	14421544	Cwc15	1
chr11	69885541	69885542	Gabarap	18		chr11	97672667	97672668	Rpl23	1		chr9	14694204	14694205	Ankrd49	1
chr11	69885543	69885544	Gabarap	14		chr11	97729227	97729228	Lasp1	1		chr9	15228787	15228788	Cep295	2
chr11	69885544	69885545	Gabarap	15		chr11	97920649	97920650	Rpl19	1		chr9	18225190	18225191	Chordc1	1
chr11	69885545	69885546	Gabarap	16		chr11	98144184	98144185	Cdk12	1		chr9	21926422	21926423	Elavl3	21
chr11	69885554	69885555	Gabarap	17		chr11	98691154	98691155	Msl1	2		chr9	21927355	21927356	Elavl3	2
chr11	69885558	69885559	Gabarap	9		chr11	98697178	98697179	Msl1	1		chr9	25219311	25219312	Septin7	1
chr11	69885569	69885570	Gabarap	31		chr11	98724480	98724481	Casc3	1		chr9	32175778	32175779	Arhgap32	1
chr11	69885579	69885580	Gabarap	4		chr11	98794482	98794483	Wipf2	1		chr9	35123665	35123666	Srpr	1
chr11	69885603	69885604	Gabarap	36		chr11	99100143	99100144	Smarce1	1		chr9	36642875	36642876	Stt3a	4
chr11	69890434	69890435	Phf23	2		chr11	100210962	100210963	Eif1	1		chr9	40715174	40715175	Hspa8	5
chr11	70129004	70129005	Rnasek	1		chr11	100211807	100211808	Eif1	1		chr9	42875339	42875340	Arhgef12	6
chr11	70129079	70129080	Rnasek	1		chr11	100211842	100211843	Eif1	3		chr9	44547827	44547828	Ddx6	2
chr11	70129102	70129103	Rnasek	1		chr11	100212148	100212149	Eif1	2		chr9	44547907	44547908	Ddx6	2
chr11	70285276	70285277	Pelp1	1		chr11	100212197	100212198	Eif1	3		chr9	44547952	44547953	Ddx6	1
chr11	70344237	70344238	Med11	1		chr11	100212704	100212705	Eif1	1		chr9	44548158	44548159	Ddx6	2
chr11	70344287	70344288	Med11	1		chr11	100212709	100212710	Eif1	1		chr9	44548180	44548181	Ddx6	1
chr11	70505180	70505181	Mink1	3		chr11	100367240	100367241	Acly	2		chr9	44548252	44548253	Ddx6	4
chr11	70535340	70535341	Slc25a11	1		chr11	100367266	100367267	Acly	2		chr9	44548264	44548265	Ddx6	7
chr11	70535375	70535376	Slc25a11	1		chr11	100367321	100367322	Acly	2		chr9	44548286	44548287	Ddx6	4
chr11	70542795	70542796	Pfn1	2		chr11	100367325	100367326	Acly	2		chr9	44653652	44653653	Arcn1	1
chr11	70542889	70542890	Pfn1	10		chr11	100367437	100367438	Acly	2		chr9	45664746	45664747	Dscaml1	3
chr11	70542903	70542904	Pfn1	18		chr11	100367490	100367491	Acly	1		chr9	45664752	45664753	Dscaml1	7
chr11	70542905	70542906	Pfn1	66		chr11	100472043	100472044	Cnp	1		chr9	45664830	45664831	Dscaml1	6
chr11	70542907	70542908	Pfn1	84		chr11	100473884	100473885	Dnajc7	1		chr9	45773438	45773439	Bace1	1
chr11	70542925	70542926	Pfn1	20		chr11	100606077	100606078	Rab5c	2		chr9	48565879	48565880	Zbtb16	1
chr11	70542926	70542927	Pfn1	22		chr11	100671723	100671724	Stat5b	1		chr9	50516483	50516484	Timm8b	1
chr11	70542929	70542930	Pfn1	12		chr11	100777848	100777849	Stat3	1		chr9	50516543	50516544	Timm8b	1
chr11	70542930	70542931	Pfn1	16		chr11	100779388	100779389	Stat3	2		chr9	50792336	50792337	Ppp2r1b	1
chr11	70542931	70542932	Pfn1	9		chr11	100954403	100954404	Atp6v0a1	1		chr9	51980163	51980164	Rdx	2
chr11	70554929	70554930	Spag7	1		chr11	100977229	100977230	Coasy	1		chr9	51998529	51998530	Rdx	3
chr11	70620108	70620109	Kif1c	1		chr11	100982773	100982774	Mlx	2		chr9	53526234	53526235	Cul5	3
chr11	70620131	70620132	Kif1c	2		chr11	100987902	100987903	Retreg3	4		chr9	54510934	54510935	Idh3a	9
chr11	70833021	70833022	Rabep1	1		chr11	101082122	101082123	Ezh1	1		chr9	54865115	54865116	Psma4	7
chr11	70834042	70834043	Nup88	1		chr11	101169007	101169008	Coa3	1		chr9	55965892	55965893	Rcn2	1
chr11	70834719	70834720	Nup88	1		chr11	101179322	101179323	Becn1	4		chr9	55965896	55965897	Rcn2	1
chr11	70834758	70834759	Nup88	1		chr11	101179334	101179335	Becn1	1		chr9	55965903	55965904	Rcn2	4
chr11	70834760	70834761	Nup88	3		chr11	101179368	101179369	Cntd1	2		chr9	56807051	56807052	Cspg4	1
chr11	70868747	70868748	C1qbp	1		chr11	101214225	101214226	Psme3	1		chr9	56845525	56845526	Imp3	2
chr11	70868770	70868771	C1qbp	2		chr11	101472707	101472708	Nbr1	21		chr9	58559873	58559874	Nptn	4
chr11	70868869	70868870	C1qbp	1		chr11	102054505	102054506	Lsm12	2		chr9	58559883	58559884	Nptn	1
chr11	70898572	70898573	Derl2	1		chr11	102054649	102054650	Lsm12	1		chr9	58559962	58559963	Nptn	1
chr11	72100361	72100362	Txndc17	1		chr11	102084751	102084752	G6pc3	1		chr9	59586493	59586494	Pkm	1
chr11	72100383	72100384	Txndc17	2		chr11	102294059	102294060	Slc25a39	1		chr9	62789276	62789277	Pias1	3
chr11	72102610	72102611	Med31	1		chr11	102294096	102294097	Slc25a39	4		chr9	64085513	64085514	Rpl4	2
chr11	72102654	72102655	Med31	1		chr11	102367018	102367019	Gpatch8	2		chr9	64622814	64622815	Rab11a	2
chr11	72197424	72197425	Xaf1	2		chr11	102956672	102956673	Nmt1	1		chr9	66344980	66344981	Herc1	1
chr11	72202859	72202860	Xaf1	1		chr11	102956700	102956701	Nmt1	4		chr9	70450351	70450352	Sltm	1
chr11	72563819	72563820	Ube2g1	1		chr11	102956715	102956716	Nmt1	3		chr9	70510754	70510755	Mindy2	1
chr11	72574393	72574394	Ube2g1	1		chr11	102956729	102956730	Nmt1	1		chr9	70512074	70512075	Mindy2	2
chr11	72574480	72574481	Ube2g1	1		chr11	102956740	102956741	Nmt1	1		chr9	70512086	70512087	Mindy2	1
chr11	72817701	72817702	Zzef1	1		chr11	103008917	103008918	Hexim1	2		chr9	71385888	71385889	Polr2m	3
chr11	72817720	72817721	Zzef1	1		chr11	103008943	103008944	Hexim1	1		chr9	72654632	72654633	Nedd4	1
chr11	72817790	72817791	Zzef1	1		chr11	104224834	104224835	Kansl1	1		chr9	72655237	72655238	Nedd4	2
chr11	73067086	73067087	Emc6	1		chr11	104224836	104224837	Kansl1	1		chr9	72655312	72655313	Nedd4	2
chr11	73067126	73067127	Emc6	1		chr11	105949764	105949765	Dcaf7	1		chr9	72655331	72655332	Nedd4	3
chr11	73196093	73196094	Aspa	2		chr11	105949826	105949827	Dcaf7	2		chr9	72655350	72655351	Nedd4	1
chr11	74565113	74565114	Pafah1b1	1		chr11	105949857	105949858	Dcaf7	1		chr9	72656933	72656934	Nedd4	6
chr11	74565126	74565127	Pafah1b1	1		chr11	106090202	106090203	Ccdc47	1		chr9	72920610	72920611	Ccpg1	1
chr11	74565569	74565570	Pafah1b1	1		chr11	106090534	106090535	Ccdc47	1		chr9	73030298	73030299	Rsl24d1	1
chr11	74567038	74567039	Pafah1b1	1		chr11	106094396	106094397	Ccdc47	1		chr9	75576570	75576571	Scg3	1
chr11	74567726	74567727	Pafah1b1	1		chr11	106094436	106094437	Ccdc47	1		chr9	78385812	78385813	Eef1a1	56
chr11	74567741	74567742	Pafah1b1	1		chr11	106101198	106101199	Ccdc47	1		chr9	78385946	78385947	Eef1a1	240
chr11	74568428	74568429	Pafah1b1	4		chr11	106115118	106115119	Ddx42	1		chr9	78386806	78386807	Eef1a1	3
chr11	74568461	74568462	Pafah1b1	2		chr11	106115123	106115124	Ddx42	1		chr9	79676496	79676497	Tmem30a	43
chr11	74570433	74570434	Pafah1b1	1		chr11	106139817	106139818	Ddx42	4		chr9	79676912	79676913	Tmem30a	1
chr11	74736203	74736204	Mnt	1		chr11	106391968	106391969	Gm36220	4		chr9	79676952	79676953	Tmem30a	3
chr11	74736273	74736274	Mnt	1		chr11	106392006	106392007	Gm36220	1		chr9	79677454	79677455	Tmem30a	1
chr11	74794719	74794720	Tsr1	1		chr11	106393567	106393568	Tex2	1		chr9	79678321	79678322	Tmem30a	2
chr11	74797861	74797862	Srr	1		chr11	106393573	106393574	Tex2	1		chr9	83661047	83661048	Elovl4	1
chr11	75067137	75067138	Ovca2	1		chr11	106671430	106671431	Ddx5	6		chr9	86648969	86648970	Snap91	1
chr11	75400137	75400138	Prpf8	1		chr11	106671464	106671465	Ddx5	4		chr9	88336150	88336151	Syncrip	1
chr11	75400139	75400140	Prpf8	2		chr11	106671470	106671471	Ddx5	4		chr9	88345042	88345043	Syncrip	1
chr11	75400163	75400164	Prpf8	1		chr11	106672934	106672935	Ddx5	1		chr9	89996594	89996595	Morf4l1	6
chr11	75517204	75517205	Pitpna	1		chr11	106673453	106673454	Ddx5	1		chr9	95285144	95285145	Chst2	1
chr11	75594608	75594609	Crk	1		chr11	106711109	106711110	Smurf2	2		chr9	95286407	95286408	Chst2	1
chr11	75642814	75642815	Ywhae	1		chr11	106713113	106713114	Smurf2	1		chr9	96214721	96214722	Atp1b3	1
chr11	75647832	75647833	Ywhae	1		chr11	107071746	107071747	Nol11	1		chr9	96214907	96214908	Atp1b3	68
chr11	75650141	75650142	Ywhae	2		chr11	107376611	107376612	Psmd12	2		chr9	98469869	98469870	Copb2	1
chr11	75655667	75655668	Ywhae	1		chr11	107377296	107377297	Psmd12	1		chr9	98470152	98470153	Copb2	2
chr11	75655736	75655737	Ywhae	1		chr11	107386583	107386584	Psmd12	7		chr9	103060151	103060152	Rab6b	1
chr11	75655772	75655773	Ywhae	1		chr11	107388398	107388399	Psmd12	4		chr9	103924655	103924656	Uba5	1
chr11	75655811	75655812	Ywhae	1		chr11	107765721	107765722	Cacng5	3		chr9	103924726	103924727	Uba5	1
chr11	75655835	75655836	Ywhae	1		chr11	107829284	107829285	Prkca	3		chr9	108172528	108172529	Nicn1	2
chr11	75656138	75656139	Ywhae	17		chr11	109290703	109290704	Gna13	3		chr9	108172553	108172554	Nicn1	1
chr11	75656139	75656140	Ywhae	32		chr11	109463843	109463844	Arsg	3		chr9	108214348	108214349	Rhoa	5
chr11	75656140	75656141	Ywhae	31		chr11	109463902	109463903	Arsg	7		chr9	108907331	108907332	Tma7	2
chr11	75656141	75656142	Ywhae	23		chr11	109559556	109559557	Prkar1a	3		chr9	110213842	110213843	Scap	1
chr11	75656142	75656143	Ywhae	20		chr11	109559600	109559601	Prkar1a	2		chr9	115071844	115071845	Stt3b	1
chr11	75656144	75656145	Ywhae	15		chr11	109559662	109559663	Prkar1a	2		chr9	115071919	115071920	Stt3b	9
chr11	75656192	75656193	Ywhae	4		chr11	109559667	109559668	Prkar1a	3		chr9	117891144	117891145	Azi2	1
chr11	75656195	75656196	Ywhae	3		chr11	109559749	109559750	Prkar1a	7		chr9	117891199	117891200	Azi2	1
chr11	75656210	75656211	Ywhae	10		chr11	109560303	109560304	Prkar1a	4		chr9	118385528	118385529	Golga4	1
chr11	75656213	75656214	Ywhae	17		chr11	109916661	109916662	Abca8a	2		chr9	120324116	120324117	Eif1b	4
chr11	75656215	75656216	Ywhae	30		chr11	112676966	112676967	Sox9	1		chr9	120401921	120401922	Rpl14	1
chr11	75937187	75937188	Vps53	1		chr11	113553951	113553952	Fam104a	1		chr9	121585758	121585759	Nktr	2
chr11	76111832	76111833	Glod4	1		chr11	114559633	114559634	Rpl38	2		chr9	122678458	122678459	Zfp445	1
chr11	76617580	76617581	Gosr1	1		chr11	115052917	115052918	Rab37	1		chrX	9521279	9521280	Dynlt3	4
chr11	76669382	76669383	Cpd	3		chr11	115286810	115286811	Cdr2l	1		chrX	10462610	10462611	Tspan7	24
chr11	76669484	76669485	Cpd	2		chr11	115498933	115498934	Mif4gd	3		chrX	10585646	10585647	Mid1ip1	12
chr11	76670280	76670281	Cpd	4		chr11	115498956	115498957	Mif4gd	12		chrX	20586366	20586367	Usp11	2
chr11	76670447	76670448	Cpd	1		chr11	115536366	115536367	Grb2	1		chrX	20718932	20718933	Araf	1
chr11	76670493	76670494	Cpd	1		chr11	115913360	115913361	H3f3b	1		chrX	35869540	35869541	Pgrmc1	2
chr11	76670525	76670526	Cpd	1		chr11	115913392	115913393	H3f3b	10		chrX	36062271	36062272	Slc25a5	24
chr11	76670575	76670576	Cpd	2		chr11	115913393	115913394	H3f3b	5		chrX	37510193	37510194	Lamp2	26
chr11	76670591	76670592	Cpd	2		chr11	115913412	115913413	H3f3b	2		chrX	40896026	40896027	Thoc2	2
chr11	76671231	76671232	Cpd	1		chr11	115913982	115913983	H3f3b	3		chrX	52110494	52110495	Hprt	1
chr11	76672962	76672963	Cpd	1		chr11	115913989	115913990	H3f3b	7		chrX	52644548	52644549	Rtl8a	80
chr11	76672970	76672971	Cpd	1		chr11	115914104	115914105	H3f3b	13		chrX	52644550	52644551	Rtl8a	84
chr11	76673014	76673015	Cpd	1		chr11	115914106	115914107	H3f3b	7		chrX	55632071	55632072	Mmgt1	4
chr11	76673022	76673023	Cpd	1		chr11	115914108	115914109	H3f3b	22		chrX	56112293	56112294	Htatsf1	1
chr11	76673060	76673061	Cpd	3		chr11	115969606	115969607	Wbp2	5		chrX	67759794	67759795	Fmr1	1
chr11	76673068	76673069	Cpd	1		chr11	115969721	115969722	Wbp2	5		chrX	70865396	70865397	Vma21	1
chr11	76673069	76673070	Cpd	4		chr11	115969757	115969758	Wbp2	3		chrX	71957517	71957518	Cetn2	1
chr11	76673149	76673150	Cpd	1		chr11	116063616	116063617	Acox1	1		chrX	71957536	71957537	Cetn2	1
chr11	76673180	76673181	Cpd	2		chr11	116227442	116227443	Rnf157	1		chrX	71957541	71957542	Cetn2	1
chr11	76673181	76673182	Cpd	1		chr11	116227486	116227487	Rnf157	1		chrX	72823127	72823128	Idh3g	2
chr11	77346460	77346461	Ssh2	1		chr11	116227517	116227518	Rnf157	1		chrX	72986729	72986730	Hcfc1	2
chr11	77350696	77350697	Ssh2	1		chr11	116361857	116361858	Prpsap1	1		chrX	73058365	73058366	Irak1	2
chr11	77428647	77428648	Taok1	1		chr11	116740296	116740297	Mettl23	1		chrX	73072965	73072966	Mecp2	1
chr11	77428709	77428710	Taok1	1		chr11	116740995	116740996	Srsf2	1		chrX	73073563	73073564	Mecp2	4
chr11	77582451	77582452	Nufip2	1		chr11	116740999	116741000	Srsf2	4		chrX	73073633	73073634	Mecp2	2
chr11	77601484	77601485	Nufip2	1		chr11	116741001	116741002	Srsf2	2		chrX	74154118	74154119	Mpp1	1
chr11	77602658	77602659	Nufip2	1		chr11	117704914	117704915	Syngr2	2		chrX	74438083	74438084	Fundc2	1
chr11	77756551	77756552	Myo18a	1		chr11	117704916	117704917	Syngr2	5		chrX	74438085	74438086	Fundc2	3
chr11	77756656	77756657	Myo18a	2		chr11	117704918	117704919	Syngr2	2		chrX	74829918	74829919	Pls3	1
chr11	77756737	77756738	Myo18a	1		chr11	117704920	117704921	Syngr2	2		chrX	76703534	76703535	Tbl1x	2
chr11	77921276	77921277	Phf12	2		chr11	117857212	117857213	Socs3	1		chrX	76804816	76804817	Prkx	4
chr11	78072251	78072252	Rpl23a	3		chr11	117914535	117914536	Pgs1	1		chrX	80141247	80141248	Tmem47	1
chr11	78072391	78072392	Rpl23a	10		chr11	117914558	117914559	Pgs1	1		chrX	93232651	93232652	Eif2s3x	1
chr11	78072409	78072410	Rpl23a	2		chr11	118055105	118055106	Cyth1	13		chrX	94092726	94092727	Arhgef9	1
chr11	78072412	78072413	Rpl23a	2		chr11	118055213	118055214	Cyth1	2		chrX	100492064	100492065	Nono	8
chr11	78073709	78073710	Rpl23a	1		chr11	118192127	118192128	Timp2	1		chrX	102058889	102058890	Pabpc1l2b	1
chr11	78146137	78146138	Sdf2	1		chr11	118192813	118192814	Timp2	1		chrX	104841397	104841398	Atrx	1
chr11	78157463	78157464	2610507B11Rik	1		chr11	118193013	118193014	Timp2	1		chrX	104841861	104841862	Atrx	1
chr11	78233288	78233289	Pigs	1		chr11	118283755	118283756	Lgals3bp	2		chrX	105247207	105247208	Pgk1	9
chr11	78233299	78233300	Pigs	1		chr11	118283813	118283814	Lgals3bp	1		chrX	108205752	108205753	Sh3bgrl	1
chr11	78233321	78233322	Pigs	1		chr11	118283867	118283868	Lgals3bp	3		chrX	108205828	108205829	Sh3bgrl	3
chr11	78233385	78233386	Pigs	1		chr11	118283922	118283923	Lgals3bp	2		chrX	133486843	133486844	Rpl36a	18
chr11	78233399	78233400	Pigs	1		chr11	118283923	118283924	Lgals3bp	15		chrX	133661231	133661232	Armcx3	1
chr11	78415400	78415401	Tnfaip1	1		chr11	118283927	118283928	Lgals3bp	3		chrX	135172467	135172468	Bex3	3
chr11	79130822	79130823	Wsb1	1		chr11	118283929	118283930	Lgals3bp	2		chrX	135633940	135633941	Morf4l2	4
chr11	79417488	79417489	Evi2a	1		chr11	118283930	118283931	Lgals3bp	2		chrX	139376558	139376559	Prps1	1
chr11	79470053	79470054	Nf1	1		chr11	118283933	118283934	Lgals3bp	2		chrX	139376662	139376663	Prps1	1
chr11	79904254	79904255	Suz12	1		chr11	118283959	118283960	Lgals3bp	1		chrX	139376708	139376709	Prps1	2
chr11	79924411	79924412	Suz12	1		chr11	118297291	118297292	Cant1	1		chrX	139849821	139849822	Psmd10	1
chr11	80027780	80027781	Tefm	1		chr11	118971169	118971170	Cbx4	6		chrX	141022377	141022378	Nxt2	1
chr11	80069631	80069632	Adap2	1		chr11	118971218	118971219	Cbx4	4		chrX	141022507	141022508	Nxt2	2
chr11	80157435	80157436	Rhot1	1		chr11	118971228	118971229	Cbx4	1		chrX	141022513	141022514	Nxt2	1
chr11	80274259	80274260	Zfp207	1		chr11	118971363	118971364	Cbx4	3		chrX	141101240	141101241	Acsl4	1
chr11	80276771	80276772	Zfp207	3		chr11	118971364	118971365	Cbx4	4		chrX	149766352	149766353	Gnl3l	1
chr11	80362323	80362324	Psmd11	1		chr11	119034093	119034094	Tbc1d16	3		chrX	149766357	149766358	Gnl3l	1
chr11	80712598	80712599	Tmem98	1		chr11	119034114	119034115	Tbc1d16	2		chrX	149766387	149766388	Gnl3l	1
chr11	82694752	82694753	Lig3	1		chr11	119034184	119034185	Tbc1d16	1		chrX	149766391	149766392	Gnl3l	4
chr11	82694773	82694774	Lig3	1		chr11	119355864	119355865	Rnf213	1		chrX	150256928	150256929	Fam120c	3
chr11	82694881	82694882	Rffl	2		chr11	119377931	119377932	Rnf213	1		chrX	152511926	152511927	Nbdy	1
chr11	82855597	82855598	Slfn5	2		chr11	119377932	119377933	Rnf213	4		chrX	158168600	158168601	Eif1ax	1
chr11	82871451	82871452	Slfn9	1		chr11	120236668	120236669	Actg1	65		chrX	158757448	158757449	Sh3kbp1	1
chr11	82893043	82893044	Slfn8	2		chr11	120236711	120236712	Actg1	152		chrX	158905413	158905414	Pdha1	1
chr11	82893116	82893117	Slfn8	2		chr11	120236713	120236714	Actg1	90		chrX	158905492	158905493	Pdha1	5
chr11	82893210	82893211	Slfn8	2		chr11	120236714	120236715	Actg1	80		chrX	161561413	161561414	Rbbp7	3
chr11	82893215	82893216	Slfn8	1		chr11	120236718	120236719	Actg1	1		chrX	161640746	161640747	Syap1	1
chr11	82893245	82893246	Slfn8	1		chr11	120236777	120236778	Actg1	1		chrX	165169774	165169775	Gpm6b	6
chr11	82893287	82893288	Slfn8	1		chr11	120236880	120236881	Actg1	5		chrX	165171616	165171617	Gpm6b	29
chr11	83226367	83226368	Ap2b1	1		chr11	120271824	120271825	Nploc4	1		chrX	165990371	165990372	Tmsb4x	55
chr11	83395885	83395886	Taf15	1		chr11	120469042	120469043	Arhgdia	5		chrX	166129480	166129481	Prps2	3
chr11	83395888	83395889	Taf15	1		chr11	120496318	120496319	Anapc11	1
chr11	83395906	83395907	Taf15	1		chr11	120496578	120496579	Anapc11	1
chr11	83397465	83397466	Taf15	1		chr11	120519517	120519518	Mafg	1
chr11	83479506	83479507	Ccl6	2		chr11	120697981	120697982	Fasn	2
chr11	83931965	83931966	Synrg	1		chr11	120852748	120852749	Csnk1d	1
chr11	83932022	83932023	Synrg	1		chr11	121113646	121113647	Cybc1	1
chr11	83935212	83935213	Synrg	1		chr11	121145059	121145060	Narf	1
chr11	84723636	84723637	Ggnbp2	1		chr11	121218182	121218183	Wdr45b	1
chr11	84727507	84727508	Ggnbp2	5		chr11	121218324	121218325	Wdr45b	1
chr11	84802264	84802265	Znhit3	1		chr11	121218366	121218367	Wdr45b	1
chr11	85237593	85237594	Ppm1d	1		chr11	121218407	121218408	Wdr45b	6
chr11	85237623	85237624	Ppm1d	1		chr11	121218408	121218409	Wdr45b	1
chr11	86099908	86099909	Brip1os	1		chr12	3297692	3297693	Rab10	4
chr11	86100094	86100095	Brip1os	2		chr12	3298043	3298044	Rab10	8
chr11	86100182	86100183	Brip1os	1		chr12	3298054	3298055	Rab10	5
chr11	86100185	86100186	Brip1os	1		chr12	3298698	3298699	Rab10	9
chr11	86100192	86100193	Brip1os	2		chr12	3298746	3298747	Rab10	2
chr11	86158303	86158304	Med13	1		chr12	3298811	3298812	Rab10	2
chr11	86210465	86210466	Med13	1		chr12	3298856	3298857	Rab10	2
chr11	86210527	86210528	Med13	1		chr12	3299528	3299529	Rab10	4
chr11	86210538	86210539	Med13	1		chr12	3299662	3299663	Rab10	7
chr11	86389933	86389934	Rps6kb1	1		chr12	3299756	3299757	Rab10	4
chr11	86391881	86391882	Rps6kb1	1		chr12	3299865	3299866	Rab10	4
chr11	86393579	86393580	Rps6kb1	1		chr12	3299867	3299868	Rab10	2
chr11	86393626	86393627	Rps6kb1	1		chr12	3556720	3556721	Asxl2	1
chr11	86475694	86475695	Vmp1	23		chr12	3963134	3963135	Dnmt3a	1
chr11	86475696	86475697	Vmp1	25		chr12	4297673	4297674	Ncoa1	1
chr11	86475698	86475699	Vmp1	22		chr12	4685607	4685608	Itsn2	1
chr11	86475701	86475702	Vmp1	4		chr12	4689684	4689685	Itsn2	1
chr11	86475702	86475703	Vmp1	1		chr12	4700038	4700039	Itsn2	2
chr11	86475863	86475864	Vmp1	1		chr12	4929236	4929237	Ubxn2a	1
chr11	86585627	86585628	Cltc	18		chr12	4929323	4929324	Ubxn2a	2
chr11	86585629	86585630	Cltc	14		chr12	8547832	8547833	Rhob	61
chr11	86585636	86585637	Cltc	4		chr12	8547834	8547835	Rhob	112
chr11	86585656	86585657	Cltc	3		chr12	8547846	8547847	Rhob	8
chr11	86585737	86585738	Cltc	7		chr12	8547910	8547911	Rhob	5
chr11	86585746	86585747	Cltc	3		chr12	8548085	8548086	Rhob	67
chr11	86586024	86586025	Cltc	1		chr12	8548257	8548258	Rhob	53
chr11	86586096	86586097	Cltc	1		chr12	8548291	8548292	Rhob	31
chr11	86586167	86586168	Cltc	3		chr12	8548300	8548301	Rhob	6
chr11	86586192	86586193	Cltc	4		chr12	8548343	8548344	Rhob	32
chr11	86586218	86586219	Cltc	1		chr12	8548344	8548345	Rhob	16
chr11	86586257	86586258	Cltc	4		chr12	8548348	8548349	Rhob	14
chr11	86586261	86586262	Cltc	1		chr12	8548349	8548350	Rhob	3
chr11	86586271	86586272	Cltc	1		chr12	8548382	8548383	Rhob	6
chr11	86586292	86586293	Cltc	1		chr12	8548414	8548415	Rhob	3
chr11	86586331	86586332	Cltc	1		chr12	8548415	8548416	Rhob	1
chr11	86586333	86586334	Cltc	1		chr12	8548420	8548421	Rhob	3
chr11	86593223	86593224	Cltc	1		chr12	8799783	8799784	Pum2	1
chr11	86593480	86593481	Cltc	1		chr12	8800000	8800001	Pum2	5
chr11	86660785	86660786	Dhx40	1		chr12	8801219	8801220	Pum2	1
chr11	86924941	86924942	Gdpd1	1		chr12	8801240	8801241	Pum2	1
chr11	86924989	86924990	Gdpd1	1		chr12	8801289	8801290	Pum2	1
chr11	86925437	86925438	Gdpd1	1		chr12	8802267	8802268	Pum2	2
chr11	87506876	87506877	Mtmr4	1		chr12	8802280	8802281	Pum2	1
chr11	87941994	87941995	Srsf1	1		chr12	8984727	8984728	Laptm4a	1
chr11	87973146	87973147	Vezf1	1		chr12	8984891	8984892	Laptm4a	2
chr11	88230523	88230524	Msi2	7		chr12	8986042	8986043	Laptm4a	1
chr11	88230552	88230553	Msi2	1		chr12	8986743	8986744	Laptm4a	1
chr11	88232933	88232934	Msi2	1		chr12	8986784	8986785	Laptm4a	2
chr11	88233005	88233006	Msi2	1		chr12	8988486	8988487	Laptm4a	5
chr11	88233020	88233021	Msi2	1		chr12	8988528	8988529	Laptm4a	2
chr11	88234066	88234067	Msi2	1		chr12	9086030	9086031	Ttc32	2
chr11	88234827	88234828	Msi2	4		chr12	11367858	11367859	Smc6	2
chr11	88234847	88234848	Msi2	1		chr12	16587215	16587216	Lpin1	2
chr11	88234870	88234871	Msi2	3		chr12	16587293	16587294	Lpin1	3
chr11	88234987	88234988	Msi2	1		chr12	17011743	17011744	Rock2	2
chr11	88235208	88235209	Msi2	1		chr12	17036340	17036341	Rock2	1
chr11	88815208	88815209	Scpep1	5		chr12	17036835	17036836	Rock2	1
chr11	88815350	88815351	Scpep1	3		chr12	17038759	17038760	Pqlc3	1
chr11	88815406	88815407	Scpep1	2		chr12	17038885	17038886	Pqlc3	1
chr11	88832114	88832115	Scpep1	1		chr12	17334205	17334206	Pdia6	1
chr11	90535513	90535514	Cox11	1		chr12	17600899	17600900	Odc1	1
chr11	93837147	93837148	Mbtd1	1		chr12	17841599	17841600	Hpcal1	1
chr11	93842764	93842765	Nme2	6		chr12	17841601	17841602	Hpcal1	1
chr11	93842765	93842766	Nme2	5		chr12	17841628	17841629	Hpcal1	1
chr11	93842770	93842771	Nme2	1		chr12	21373296	21373297	Iah1	1
chr11	93842779	93842780	Nme2	1		chr12	21440727	21440728	Ywhaq	2
chr11	93849992	93849993	Nme1	1		chr12	21448270	21448271	Ywhaq	2
chr11	93850090	93850091	Nme1	5		chr12	25109149	25109150	Kidins220	2
chr11	93850134	93850135	Nme1	2		chr12	25109165	25109166	Kidins220	2
chr11	93904527	93904528	Spag9	1		chr12	26527176	26527177	Cmpk2	1
chr11	93977085	93977086	Spag9	2		chr12	28683811	28683812	Rps7	6
chr11	94013977	94013978	Spag9	1		chr12	28683816	28683817	Rps7	4
chr11	94014986	94014987	Spag9	2		chr12	28683817	28683818	Rps7	9
chr11	94105327	94105328	Tob1	2		chr12	31537360	31537361	Cbll1	1
chr11	94105972	94105973	Tob1	1		chr12	31976653	31976654	Hbp1	3
chr11	94105975	94105976	Tob1	2		chr12	31976738	31976739	Hbp1	1
chr11	94182195	94182196	Luc7l3	1		chr12	31980839	31980840	Hbp1	2
chr11	94182204	94182205	Luc7l3	1		chr12	31980935	31980936	Hbp1	2
chr11	94190782	94190783	Luc7l3	5		chr12	32884968	32884969	Nampt	1
chr11	94190784	94190785	Luc7l3	1		chr12	32891136	32891137	Nampt	1
chr11	94197047	94197048	Luc7l3	1		chr12	32900710	32900711	Nampt	1
chr11	94197048	94197049	Luc7l3	2		chr12	32900793	32900794	Nampt	4
chr11	94232575	94232576	Ankrd40	1		chr12	32900829	32900830	Nampt	1
chr11	94535819	94535820	Lrrc59	1		chr12	32901348	32901349	Nampt	6
chr11	94550847	94550848	Mrpl27	1		chr12	32902977	32902978	Nampt	1
chr11	94897124	94897125	Ppp1r9b	1		chr12	33025600	33025601	Sypl	2
chr11	94917206	94917207	Pdk2	1		chr12	33025775	33025776	Sypl	26
chr11	95165248	95165249	Kat7	1		chr12	33025862	33025863	Sypl	13
chr11	95165305	95165306	Kat7	2		chr12	33026403	33026404	Sypl	1
chr11	95165341	95165342	Kat7	1		chr12	33026623	33026624	Sypl	4
chr11	95165448	95165449	Kat7	1		chr12	33026748	33026749	Sypl	14
chr11	95165454	95165455	Kat7	1		chr12	33026860	33026861	Sypl	9
chr11	95281453	95281454	Slc35b1	1		chr12	33027440	33027441	Sypl	3
chr11	95383171	95383172	Spop	1		chr12	33426129	33426130	Atxn7l1	1
chr11	95383195	95383196	Spop	2		chr12	36247076	36247077	Ankmy2	1
chr11	95383197	95383198	Spop	4		chr12	38916155	38916156	Etv1	3
chr11	95383204	95383205	Spop	3		chr12	38917990	38917991	Etv1	1
chr11	95383220	95383221	Spop	1		chr12	40365886	40365887	Zfp277	1
chr11	95383238	95383239	Spop	2		chr12	40365887	40365888	Zfp277	1
chr11	95383251	95383252	Spop	4		chr12	40895289	40895290	Dock4	1
chr11	95383278	95383279	Spop	3		chr12	44252828	44252829	Dnajb9	4
chr11	95383344	95383345	Spop	1		chr12	44252926	44252927	Dnajb9	3
chr11	95383347	95383348	Spop	3		chr12	44900911	44900912	Stxbp6	4
chr11	95383732	95383733	Spop	2		chr12	44902431	44902432	Stxbp6	1
chr11	95383769	95383770	Spop	1		chr12	51790653	51790654	Hectd1	3
chr11	95383807	95383808	Spop	1		chr12	51790776	51790777	Hectd1	5
chr11	95571480	95571481	Phb	1		chr12	51790778	51790779	Hectd1	5
chr11	95963938	95963939	Atp5g1	1		chr12	51790824	51790825	Hectd1	1
chr11	95963987	95963988	Atp5g1	2		chr12	51801811	51801812	Hectd1	1
chr11	96697952	96697953	Cbx1	1		chr12	51847722	51847723	Hectd1	2
chr11	96698761	96698762	Cbx1	1		chr12	51848951	51848952	Hectd1	2
chr11	96708848	96708849	Nfe2l1	1		chr12	51848953	51848954	Hectd1	2
chr11	96844397	96844398	Sp2	1		chr12	51922914	51922915	Heatr5a	1
chr11	97097535	97097536	Npepps	1		chr12	52614154	52614155	Arhgap5	2
chr11	97097622	97097623	Npepps	1		chr12	54692291	54692292	Sptssa	3
chr11	97097657	97097658	Npepps	2		chr12	54692307	54692308	Sptssa	1
chr11	97392979	97392980	Arhgap23	1		chr12	54692429	54692430	Sptssa	2
chr11	97400330	97400331	Srcin1	1		chr12	54692461	54692462	Sptssa	1
chr11	97576028	97576029	Mllt6	3		chr12	54692530	54692531	Sptssa	3
chr11	97606077	97606078	Pip4k2b	2		chr12	54692572	54692573	Sptssa	1
chr11	97606136	97606137	Pip4k2b	2		chr12	54692591	54692592	Sptssa	1
chr11	97606167	97606168	Pip4k2b	2		chr12	54720492	54720493	Eapp	2
chr11	97606170	97606171	Pip4k2b	2		chr12	54830814	54830815	Snx6	4
chr11	97637843	97637844	Cwc25	1		chr12	54830838	54830839	Snx6	1
chr11	97668942	97668943	Rpl23	51		chr12	54905932	54905933	Cfl2	1
chr11	97669127	97669128	Rpl23	13		chr12	54907131	54907132	Cfl2	5
chr11	97669170	97669171	Rpl23	8		chr12	55252631	55252632	Fam177a2	3
chr11	97669180	97669181	Rpl23	13		chr12	55257522	55257523	Fam177a2	6
chr11	97669198	97669199	Rpl23	26		chr12	55257539	55257540	Fam177a2	2
chr11	97729227	97729228	Lasp1	5		chr12	55260711	55260712	Fam177a2	2
chr11	97921110	97921111	Rpl19	2		chr12	55261064	55261065	Fam177a	3
chr11	97921160	97921161	Rpl19	2		chr12	55261092	55261093	Fam177a	3
chr11	97979676	97979677	Fbxl20	1		chr12	55262780	55262781	Fam177a	3
chr11	98043164	98043165	Med1	1		chr12	55309151	55309152	Srp54a	2
chr11	98043266	98043267	Med1	1		chr12	55461234	55461235	Psma6	1
chr11	98046427	98046428	Med1	1		chr12	55465059	55465060	Psma6	3
chr11	98046505	98046506	Med1	2		chr12	55465111	55465112	Psma6	3
chr11	98046557	98046558	Med1	1		chr12	55536753	55536754	Nfkbia	1
chr11	98328664	98328665	Mien1	3		chr12	55817545	55817546	Ralgapa1	4
chr11	98328769	98328770	Mien1	2		chr12	57286910	57286911	Prps1l3	1
chr11	98659644	98659645	Thra	1		chr12	59090380	59090381	Trappc6b	1
chr11	98659681	98659682	Thra	1		chr12	59119538	59119539	Pnn	4
chr11	98659695	98659696	Thra	3		chr12	59119593	59119594	Pnn	1
chr11	98691112	98691113	Msl1	1		chr12	59184375	59184376	Mia2	1
chr11	98691691	98691692	Msl1	3		chr12	59205053	59205054	Mia2	1
chr11	98691758	98691759	Msl1	1		chr12	59236600	59236601	Mia2	1
chr11	98697012	98697013	Msl1	1		chr12	59236668	59236669	Mia2	2
chr11	98698461	98698462	Msl1	1		chr12	59236698	59236699	Mia2	1
chr11	98724395	98724396	Casc3	1		chr12	65039376	65039377	Togaram1	1
chr11	98794483	98794484	Wipf2	1		chr12	65103229	65103230	Prpf39	1
chr11	100210890	100210891	Eif1	1		chr12	65109506	65109507	Fkbp3	5
chr11	100210900	100210901	Eif1	1		chr12	69205518	69205519	Rps29	6
chr11	100210904	100210905	Eif1	1		chr12	69205522	69205523	Rps29	2
chr11	100210906	100210907	Eif1	3		chr12	69229781	69229782	Rpl36al	1
chr11	100212253	100212254	Eif1	6		chr12	69232565	69232566	Mgat2	1
chr11	100212709	100212710	Eif1	1		chr12	69357052	69357053	Klhdc2	2
chr11	100261596	100261597	Jup	1		chr12	69367190	69367191	Nemf	3
chr11	100367237	100367238	Acly	1		chr12	69367301	69367302	Nemf	1
chr11	100367325	100367326	Acly	1		chr12	69367325	69367326	Nemf	1
chr11	100472384	100472385	Cnp	1		chr12	69387689	69387690	Nemf	1
chr11	100473817	100473818	Dnajc7	2		chr12	69420287	69420288	Arf6	1
chr11	100585978	100585979	Dhx58	1		chr12	69420315	69420316	Arf6	1
chr11	100606098	100606099	Rab5c	6		chr12	69791326	69791327	Dmac2l	1
chr11	100671830	100671831	Stat5b	1		chr12	69851222	69851223	Map4k5	2
chr11	100777819	100777820	Stat3	1		chr12	70012901	70012902	Sav1	1
chr11	100777887	100777888	Stat3	1		chr12	70514056	70514057	Tmx1	1
chr11	100954420	100954421	Atp6v0a1	2		chr12	70514211	70514212	Tmx1	1
chr11	100954439	100954440	Atp6v0a1	1		chr12	71006777	71006778	Actr10	5
chr11	100968238	100968239	Naglu	1		chr12	71008733	71008734	Actr10	4
chr11	100968319	100968320	Naglu	3		chr12	71008735	71008736	Actr10	1
chr11	100982774	100982775	Mlx	1		chr12	71008825	71008826	Actr10	1
chr11	101168928	101168929	Coa3	1		chr12	71108073	71108074	Arid4a	1
chr11	101168981	101168982	Coa3	1		chr12	71145053	71145054	Arid4a	1
chr11	101169002	101169003	Coa3	1		chr12	72037521	72037522	Daam1	3
chr11	101179276	101179277	Cntd1	2		chr12	72146831	72146832	Jkamp	3
chr11	101179322	101179323	Becn1	2		chr12	72146864	72146865	Jkamp	1
chr11	101179325	101179326	Becn1	1		chr12	72147829	72147830	Jkamp	1
chr11	101179342	101179343	Cntd1	1		chr12	72147933	72147934	Jkamp	1
chr11	101179390	101179391	Cntd1	1		chr12	72148014	72148015	Jkamp	11
chr11	101179414	101179415	Becn1	2		chr12	72148045	72148046	Jkamp	1
chr11	101214225	101214226	Psme3	1		chr12	72148073	72148074	Jkamp	3
chr11	101472668	101472669	Nbr1	2		chr12	72148098	72148099	Jkamp	3
chr11	101558385	101558386	Arl4d	1		chr12	72258741	72258742	Rtn1	4
chr11	101862020	101862021	Dusp3	1		chr12	72841090	72841091	Ppm1a	3
chr11	102054572	102054573	Lsm12	1		chr12	72841091	72841092	Ppm1a	1
chr11	102054597	102054598	Lsm12	1		chr12	73400545	73400546	Slc38a6	1
chr11	102294090	102294091	Slc25a39	1		chr12	73993616	73993617	Hif1a	1
chr11	102327529	102327530	Grn	81		chr12	74030977	74030978	Snapc1	2
chr11	102368312	102368313	Gpatch8	1		chr12	75447358	75447359	Rhoj	1
chr11	102885111	102885112	Dcakd	1		chr12	75499587	75499588	Ppp2r5e	1
chr11	102956676	102956677	Nmt1	1		chr12	75499597	75499598	Ppp2r5e	1
chr11	102956700	102956701	Nmt1	1		chr12	75500367	75500368	Ppp2r5e	1
chr11	102956729	102956730	Nmt1	1		chr12	75500384	75500385	Ppp2r5e	1
chr11	103008917	103008918	Hexim1	1		chr12	75500396	75500397	Ppp2r5e	1
chr11	103008997	103008998	Hexim1	1		chr12	75761120	75761121	Sgpp1	1
chr11	103009161	103009162	Hexim1	1		chr12	75761261	75761262	Sgpp1	1
chr11	103256094	103256095	Plekhm1	1		chr12	75761350	75761351	Sgpp1	1
chr11	103712879	103712880	Nsf	1		chr12	76366440	76366441	Mthfd1	2
chr11	104224834	104224835	Kansl1	1		chr12	76829683	76829684	Churc1	3
chr11	105816986	105816987	Tanc2	1		chr12	76984311	76984312	Max	3
chr11	105949803	105949804	Dcaf7	1		chr12	76984316	76984317	Max	2
chr11	105949830	105949831	Dcaf7	1		chr12	78731283	78731284	Gphn	1
chr11	105949852	105949853	Dcaf7	1		chr12	78731351	78731352	Gphn	1
chr11	105950036	105950037	Dcaf7	1		chr12	78871642	78871643	Mpp5	1
chr11	106046423	106046424	Map3k3	1		chr12	78884798	78884799	Mpp5	15
chr11	106090260	106090261	Ccdc47	1		chr12	78887273	78887274	Mpp5	25
chr11	106091641	106091642	Ccdc47	2		chr12	78890098	78890099	Atp6v1d	3
chr11	106139817	106139818	Ddx42	5		chr12	78890101	78890102	Atp6v1d	1
chr11	106153648	106153649	Psmc5	1		chr12	78931747	78931748	Eif2s1	6
chr11	106393411	106393412	Tex2	1		chr12	78931840	78931841	Eif2s1	3
chr11	106671470	106671471	Ddx5	4		chr12	79128397	79128398	Pigh	1
chr11	106672536	106672537	Ddx5	23		chr12	79204626	79204627	Vti1b	1
chr11	106672934	106672935	Ddx5	1		chr12	80155070	80155071	Zfp36l1	5
chr11	106674797	106674798	Ddx5	1		chr12	80155072	80155073	Zfp36l1	1
chr11	106676359	106676360	Ddx5	1		chr12	80155073	80155074	Zfp36l1	13
chr11	106711084	106711085	Smurf2	1		chr12	80155827	80155828	Zfp36l1	1
chr11	106711109	106711110	Smurf2	1		chr12	80680929	80680930	Erh	2
chr11	106711118	106711119	Smurf2	1		chr12	80681045	80681046	Erh	2
chr11	106925925	106925926	Bptf	1		chr12	80681047	80681048	Erh	1
chr11	106926609	106926610	Bptf	1		chr12	80681216	80681217	Erh	1
chr11	107376570	107376571	Psmd12	1		chr12	80729899	80729900	Slc39a9	1
chr11	107376611	107376612	Psmd12	1		chr12	80729901	80729902	Slc39a9	1
chr11	107386583	107386584	Psmd12	3		chr12	80927237	80927238	Susd6	1
chr11	107388813	107388814	Psmd12	1		chr12	80994141	80994142	Srsf5	1
chr11	107388820	107388821	Psmd12	1		chr12	80994351	80994352	Srsf5	1
chr11	107577655	107577656	Helz	1		chr12	80996578	80996579	Srsf5	1
chr11	107765705	107765706	Cacng5	1		chr12	80996777	80996778	Srsf5	1
chr11	107765720	107765721	Cacng5	2		chr12	80996968	80996969	Srsf5	12
chr11	107830348	107830349	Prkca	1		chr12	83706349	83706350	Rbm25	1
chr11	109288689	109288690	Gna13	2		chr12	83706351	83706352	Rbm25	1
chr11	109290551	109290552	Gna13	1		chr12	83707119	83707120	Rbm25	1
chr11	109291947	109291948	Gna13	2		chr12	83710945	83710946	Rbm25	1
chr11	109292043	109292044	Gna13	1		chr12	83714881	83714882	Rbm25	1
chr11	109292071	109292072	Gna13	2		chr12	83771446	83771447	Psen1	1
chr11	109292073	109292074	Gna13	2		chr12	84064195	84064196	Acot1	32
chr11	109558468	109558469	Prkar1a	1		chr12	84196346	84196347	Mideas	2
chr11	109558493	109558494	Prkar1a	1		chr12	84196350	84196351	Mideas	2
chr11	109559660	109559661	Prkar1a	1		chr12	84196687	84196688	Mideas	1
chr11	109559662	109559663	Prkar1a	1		chr12	84196691	84196692	Mideas	1
chr11	109559749	109559750	Prkar1a	4		chr12	84354596	84354597	Ptgr2	1
chr11	109559763	109559764	Prkar1a	2		chr12	84354628	84354629	Ptgr2	2
chr11	109559765	109559766	Prkar1a	9		chr12	84362454	84362455	Ptgr2	2
chr11	109560292	109560293	Prkar1a	2		chr12	84362531	84362532	Ptgr2	1
chr11	109992306	109992307	Abca9	1		chr12	84578211	84578212	Lin52	1
chr11	112935030	112935031	2610035D17Rik	1		chr12	84803413	84803414	Npc2	1
chr11	114559421	114559422	Rpl38	1		chr12	84803455	84803456	Npc2	1
chr11	114559431	114559432	Rpl38	5		chr12	84821517	84821518	Isca2	1
chr11	114559433	114559434	Rpl38	1		chr12	84821692	84821693	Isca2	8
chr11	114559636	114559637	Rpl38	12		chr12	84821747	84821748	Isca2	1
chr11	114559761	114559762	Rpl38	27		chr12	84965245	84965246	Arel1	1
chr11	115238590	115238591	Hid1	1		chr12	84965260	84965261	Arel1	2
chr11	115414403	115414404	Sumo2	1		chr12	85076146	85076147	Ylpm1	1
chr11	115498928	115498929	Mif4gd	1		chr12	85346416	85346417	Nek9	3
chr11	115498951	115498952	Mif4gd	2		chr12	85346491	85346492	Nek9	6
chr11	115498956	115498957	Mif4gd	4		chr12	85346561	85346562	Nek9	2
chr11	115499005	115499006	Mif4gd	1		chr12	85387632	85387633	Tmed10	4
chr11	115499046	115499047	Mif4gd	2		chr12	85390182	85390183	Tmed10	2
chr11	115499091	115499092	Mif4gd	4		chr12	85390258	85390259	Tmed10	1
chr11	115499095	115499096	Mif4gd	2		chr12	85523120	85523121	Fos	1
chr11	115499098	115499099	Mif4gd	6		chr12	85523213	85523214	Fos	5
chr11	115534943	115534944	Grb2	1		chr12	85523215	85523216	Fos	2
chr11	115536455	115536456	Grb2	3		chr12	85523410	85523411	Fos	2
chr11	115913374	115913375	H3f3b	4		chr12	85523699	85523700	Fos	32
chr11	115913380	115913381	H3f3b	9		chr12	86928150	86928151	Irf2bpl	1
chr11	115913392	115913393	H3f3b	14		chr12	86928269	86928270	Irf2bpl	1
chr11	115913393	115913394	H3f3b	17		chr12	86928275	86928276	Irf2bpl	1
chr11	115913412	115913413	H3f3b	7		chr12	86928295	86928296	Irf2bpl	1
chr11	115914104	115914105	H3f3b	31		chr12	86928316	86928317	Irf2bpl	2
chr11	115914106	115914107	H3f3b	48		chr12	87010078	87010079	Cipc	2
chr11	115914108	115914109	H3f3b	36		chr12	87211169	87211170	Gstz1	2
chr11	115969557	115969558	Wbp2	1		chr12	87356621	87356622	Sptlc2	1
chr11	115969563	115969564	Wbp2	1		chr12	87490750	87490751	Slirp	1
chr11	115969720	115969721	Wbp2	1		chr12	87490785	87490786	Slirp	2
chr11	116063055	116063056	Acox1	1		chr12	87496064	87496065	Slirp	2
chr11	116063580	116063581	Acox1	1		chr12	87496575	87496576	Slirp	3
chr11	116106028	116106029	Ten1	2		chr12	87496689	87496690	Slirp	2
chr11	116136028	116136029	Srp68	1		chr12	87496884	87496885	Snw1	1
chr11	116136081	116136082	Srp68	1		chr12	87496901	87496902	Snw1	8
chr11	116227469	116227470	Rnf157	1		chr12	87496920	87496921	Snw1	15
chr11	116227481	116227482	Rnf157	1		chr12	87496922	87496923	Snw1	3
chr11	116227549	116227550	Rnf157	1		chr12	87497023	87497024	Snw1	2
chr11	116329852	116329853	Ubald2	1		chr12	87506215	87506216	Snw1	4
chr11	116329877	116329878	Ubald2	1		chr12	87506218	87506219	Snw1	3
chr11	116740883	116740884	Srsf2	4		chr12	87506242	87506243	Snw1	1
chr11	116740995	116740996	Srsf2	1		chr12	91601628	91601629	Ston2	1
chr11	116740999	116741000	Srsf2	8		chr12	91773049	91773050	Sel1l	3
chr11	116741007	116741008	Srsf2	1		chr12	91773097	91773098	Sel1l	4
chr11	116741182	116741183	Srsf2	1		chr12	91773167	91773168	Sel1l	2
[truncated: 8,525 more rows]
