# Supplementary material for: Single-cell discovery of m6A RNA modifications in the hippocampus
Source: Genome Res. 2024 Jun;34(6):822–36. doi: 10.1101/gr.278424.123 (PMC11293556; doi:10.1101/gr.278424.123)
Supplement: Supplement 25 [file Supplemental_Table_S15.xlsx]

## Sheet: Readme
m6A detection in Mettl3-konockout mice
Description: In the Mettl3-knockout mice, the collected information corresponds to that obtained from the wild-type mice. 1. Quality control of E-YTH and E-YTHmut in the context of Mettl3-knockout mice. 2. Number of cells per cell type in the context of Mettl3-knockout mice. 3. Number of genes per cell type in the context of Mettl3-knockout mice. 4. Differential expression analysis between E-YTH …

## Sheet: QC of Mettl3 KO mice 
QC of single cell sequencing in Mettl3 KO mice
Samples profling	YTH	YTHmut
Cells loading to the nano-well chip	30000	25000
Cells analyzed after filtering	14632	14172
Mean number of mapped reads per cell by animal	35874.1	38334.8
Mean number of UMI counts detected per cell by animal	13881.9	10388.3
Mean number of genes detected per cell by animal	3655.91	3255.15
Percent of sequencing saturation by animal	85.35	92.97

## Sheet: Number of cells per cell type
Numbers of cells per cell type in Mettl3 KO mice
Samples profling	YTH	YTHmut
Oligodendrocyte lineage	353	1,578
Neuronal lineage	141	450
Endothelial cells	40	60
Immune cells	10,388	6,398
Astrocytes	67	996

## Sheet: Numbers of genes per cell type
Numbers of genes per cell type in Mettl3 KO mice
Cell type	Max_Features
Oligodendrocyte lineage	5,998
Neuronal lineage	5,991
Endothelial cells	5,418
Immune cells	5,999
Astrocytes	5,906

## Sheet: Defferential expression 
Cluster_id	Gene	E-YTH_p_val	E-YTH_avg_logFC	E-YTH_pct.1	E-YTH_pct.2	E-YTH__p_val_adj	E-YTHmut_p_val	E-YTHmut_avg_logFC	E-YTHmut_pct.1	E-YTHmut_pct.2	E-YTHmut_p_val_adj	max_pval	minimump_p_val
0	4930430E12Rik	0	1.45379	0.833	0.195	0	0	1.75197	0.761	0.035	0	0	0
0	AA467197	2.38411e-226	0.712109	0.784	0.48	7.35091e-222	0	2.94216	0.821	0.052	0	2.38411e-226	0
0	AB124611	0	0.76149	0.958	0.578	0	0	1.64839	0.86	0.099	0	0	0
0	Acod1	0	1.67754	0.863	0.319	0	0	2.82291	0.797	0.062	0	0	0
0	Anpep	2.23528e-166	0.716538	0.379	0.156	6.89203e-162	0	1.59668	0.574	0.032	0	2.23528e-166	0
0	Aoah	0	0.804975	0.848	0.373	0	0	1.2111	0.712	0.08	0	0	0
0	Arg1	1.83738e-287	2.04354	0.395	0.115	5.66518e-283	0	3.54739	0.545	0.01	0	1.83738e-287	0
0	Arg2	0	0.581236	0.371	0.073	0	0	0.761462	0.377	0.008	0	0	0
0	Ass1	0	0.926904	0.932	0.522	0	0	1.89443	0.881	0.122	0	0	0
0	Bst1	3.20974e-259	0.5238	0.559	0.231	9.89658e-255	0	0.847048	0.457	0.017	0	3.20974e-259	0
0	C3	0	1.61295	0.928	0.307	0	0	2.47072	0.899	0.054	0	0	0
0	Calhm6	0	1.2393	0.912	0.494	0	0	2.25863	0.803	0.116	0	0	0
0	Capg	0	0.753995	0.782	0.41	0	0	1.67363	0.823	0.14	0	0	0
0	Cd300lf	0	0.868449	0.95	0.491	0	0	1.94599	0.904	0.114	0	0	0
0	Cd40	2.84547e-157	0.404926	0.66	0.374	8.77344e-153	0	1.19574	0.579	0.052	0	2.84547e-157	0
0	Clec12a	0	1.2258	0.856	0.306	0	0	1.56758	0.719	0.034	0	0	0
0	Clec4d	0	1.1295	0.574	0.13	0	0	1.56173	0.618	0.014	0	0	0
0	Clec4e	0	1.67397	0.671	0.214	0	0	2.31969	0.657	0.018	0	0	0
0	Clec4n	1.75107e-170	0.457987	0.29	0.089	5.39909e-166	0	0.949378	0.418	0.024	0	1.75107e-170	0
0	Clec7a	0	1.24875	0.974	0.584	0	0	3.42609	0.977	0.225	0	0	0
0	Cxcl16	0	1.31558	0.988	0.545	0	0	2.35986	0.99	0.272	0	0	0
0	Cxcr4	0	0.719741	0.956	0.682	0	0	2.32726	0.945	0.156	0	0	0
0	Cybb	0	1.41618	0.998	0.61	0	0	3.43086	0.997	0.156	0	0	0
0	Cyp4f18	0	1.49951	0.961	0.363	0	0	1.35034	0.743	0.037	0	0	0
0	Dpep2	0	0.750125	0.514	0.125	0	0	1.22151	0.603	0.017	0	0	0
0	Dram1	0	0.864819	0.759	0.325	0	0	1.54248	0.714	0.054	0	0	0
0	ENSMUSG00000120878	0	1.03258	0.816	0.325	0	0	2.07105	0.829	0.068	0	0	0
0	Ecm1	1.2283e-289	0.559609	0.477	0.154	3.78723e-285	0	0.920357	0.509	0.031	0	1.2283e-289	0
0	F10	0	1.28581	0.589	0.147	0	0	1.68973	0.639	0.011	0	0	0
0	Fgr	2.13283e-221	0.430785	0.837	0.462	6.57615e-217	0	1.53915	0.8	0.054	0	2.13283e-221	0
0	Flt1	0	0.592869	0.614	0.196	0	0	1.08375	0.553	0.026	0	0	0
0	Fn1	0	0.737441	0.692	0.284	0	0	1.99244	0.725	0.038	0	0	0
0	Fpr2	0	1.48806	0.578	0.181	0	0	2.14319	0.647	0.02	0	0	0
0	Fxyd5	3.29371e-152	0.368084	0.992	0.789	1.01555e-147	0	2.10996	0.977	0.142	0	3.29371e-152	0
0	Gda	0	0.564872	0.725	0.302	0	0	1.97481	0.808	0.037	0	0	0
0	Gm21188	0	0.689517	0.803	0.339	0	0	1.43898	0.779	0.032	0	0	0
0	Gm36161	0	1.03316	0.937	0.416	0	0	2.14795	0.912	0.042	0	0	0
0	Gm5431	0	0.578977	0.798	0.395	0	0	1.52835	0.808	0.118	0	0	0
0	Gm6377	1.88218e-257	0.573185	0.755	0.393	5.80332e-253	0	1.17848	0.644	0.046	0	1.88218e-257	0
0	Gpr141	0	0.707418	0.907	0.451	0	0	2.43557	0.909	0.039	0	0	0
0	H2-Aa	0	1.27059	0.995	0.891	0	0	4.0491	0.935	0.167	0	0	0
0	H2-Ab1	0	1.35647	0.995	0.894	0	0	4.1466	0.943	0.193	0	0	0
0	H2-Eb1	0	1.18641	0.985	0.78	0	0	3.69795	0.909	0.118	0	0	0
0	Hp	0	0.839237	0.466	0.14	0	0	1.2381	0.478	0.011	0	0	0
0	Hpse	6.38139e-285	0.509089	0.722	0.353	1.96757e-280	0	0.935482	0.569	0.039	0	6.38139e-285	0
0	Ifi211	2.84526e-248	0.500969	0.965	0.612	8.77278e-244	0	2.02523	0.922	0.15	0	2.84526e-248	0
0	Il1rn	0	1.4239	0.851	0.414	0	0	3.20302	0.842	0.06	0	0	0
0	Klra2	0	0.805917	0.895	0.373	0	0	2.08396	0.855	0.029	0	0	0
0	Lgals3	0	1.21446	0.988	0.637	0	0	3.38133	0.966	0.084	0	0	0
0	Lilrb4b	0	0.624792	0.92	0.562	0	0	1.67308	0.899	0.138	0	0	0
0	Ly6c2	0	1.33274	0.987	0.784	0	0	4.17575	0.901	0.089	0	0	0
0	Ly6i	0	2.60382	0.941	0.485	0	0	4.22282	0.909	0.064	0	0	0
0	Mcemp1	3.44805e-201	0.59031	0.578	0.289	1.06314e-196	0	1.41699	0.639	0.031	0	3.44805e-201	0
0	Mefv	5.46513e-213	0.394907	0.532	0.223	1.68506e-208	0	0.691716	0.397	0.017	0	5.46513e-213	0
0	Ms4a4c	0	0.80733	0.995	0.699	0	0	2.99551	0.964	0.158	0	0	0
0	Ms4a6c	0	1.16505	1	0.677	0	0	3.10012	1	0.3	0	0	0
0	Ms4a7	0	1.82663	0.68	0.111	0	0	2.12995	0.782	0.039	0	0	0
0	Msr1	0	1.17459	0.823	0.289	0	0	1.72302	0.792	0.084	0	0	0
0	Myof	0	0.894409	0.796	0.274	0	0	1.58799	0.805	0.043	0	0	0
0	Nfil3	2.70224e-304	0.628909	0.921	0.618	8.3318e-300	0	1.69833	0.888	0.16	0	2.70224e-304	0
0	Nos2	0	1.87474	0.434	0.093	0	0	2.14082	0.403	0.009	0	0	0
0	Oas3	7.20619e-127	0.354855	0.791	0.525	2.22189e-122	0	1.44137	0.784	0.101	0	7.20619e-127	0
0	Pirb	0	0.729074	0.889	0.478	0	0	1.21217	0.743	0.103	0	0	0
0	Plbd1	0	0.599429	0.944	0.484	0	0	1.75347	0.852	0.037	0	0	0
0	Ptgs2	0	1.73795	0.723	0.265	0	0	2.51263	0.678	0.079	0	0	0
0	Rab7b	0	0.735286	0.691	0.239	0	0	0.883981	0.535	0.043	0	0	0
0	Sirpb1a	1.81397e-201	0.31412	0.425	0.156	5.59303e-197	0	0.629487	0.442	0.013	0	1.81397e-201	0
0	Sirpb1b	0	0.736134	0.771	0.265	0	0	1.26062	0.743	0.021	0	0	0
0	Sirpb1c	0	1.19907	0.964	0.367	0	0	2.72655	0.961	0.03	0	0	0
0	Slamf7	0	1.08062	0.972	0.635	0	0	2.55343	0.938	0.076	0	0	0
0	Slamf8	0	0.67844	0.809	0.382	0	0	1.07439	0.686	0.081	0	0	0
0	Slfn1	7.56715e-133	0.336739	0.975	0.678	2.33318e-128	0	2.56461	0.938	0.117	0	7.56715e-133	0
0	Slfn4	0	1.22113	0.804	0.446	0	0	3.62084	0.79	0.041	0	0	0
0	Tgfbi	0	1.98608	0.999	0.589	0	0	3.60792	0.995	0.305	0	0	0
0	Thbs1	0	0.739654	0.799	0.396	0	0	2.95455	0.764	0.099	0	0	0
0	Trem1	4.06562e-245	0.664071	0.428	0.143	1.25355e-240	0	0.877241	0.356	0.015	0	4.06562e-245	0
0	Msrb1	0	0.787523	0.958	0.543	0	2.4545e-307	1.65084	0.886	0.181	7.56797e-303	2.4545e-307	0
0	Cd74	0	1.25312	0.998	0.9	0	5.91115e-305	3.8127	0.99	0.288	1.82259e-300	5.91115e-305	0
0	Ly6a	0	0.818075	0.996	0.82	0	5.34412e-300	2.97323	0.927	0.218	1.64775e-295	5.34412e-300	0
0	Ccl5	0	0.973267	0.94	0.75	0	1.14127e-298	2.88562	0.904	0.186	3.51887e-294	1.14127e-298	0
0	AW112010	0	0.830362	0.994	0.864	0	1.48785e-293	3.21385	0.969	0.275	4.58748e-289	1.48785e-293	0
0	Gpr35	0	0.64114	0.91	0.507	0	1.73992e-290	1.59201	0.821	0.149	5.36469e-286	1.73992e-290	0
0	Ccr1	0	0.575776	0.792	0.365	0	5.68263e-283	1.42381	0.73	0.103	1.75212e-278	5.68263e-283	0
0	Il18bp	0	1.1283	0.909	0.452	0	8.1232e-279	1.39769	0.756	0.128	2.50462e-274	8.1232e-279	0
0	Plin2	0	0.964341	0.906	0.47	0	7.52128e-278	1.50734	0.87	0.182	2.31904e-273	7.52128e-278	0
0	ENSMUSG00000120849	0	1.45485	0.916	0.234	0	1.95019e-277	0.849887	0.613	0.075	6.01303e-273	1.95019e-277	0
0	AI504432	0	1.03232	0.883	0.436	0	2.54294e-274	1.5071	0.829	0.16	7.84064e-270	2.54294e-274	0
0	Mmp14	0	1.90766	0.972	0.306	0	2.02522e-270	1.90181	0.927	0.258	6.24435e-266	2.02522e-270	0
0	Ms4a6d	0	1.07287	0.984	0.528	0	1.25652e-261	2.30886	0.974	0.338	3.87423e-257	1.25652e-261	0
0	Smpdl3b	0	0.730631	0.497	0.149	0	1.22976e-235	0.87401	0.455	0.046	3.79171e-231	1.22976e-235	0
0	Plaur	0	0.860078	0.879	0.417	0	2.00581e-235	1.75479	0.862	0.216	6.18452e-231	2.00581e-235	0
0	Axl	0	1.3373	0.973	0.469	0	2.26408e-234	1.99869	0.984	0.353	6.98084e-230	2.26408e-234	0
0	Anxa4	0	0.672605	0.882	0.537	0	2.84188e-231	1.72994	0.922	0.3	8.76238e-227	2.84188e-231	0
0	Dnase1l1	0	0.563601	0.582	0.209	0	1.02423e-228	0.769385	0.54	0.07	3.15802e-224	1.02423e-228	0
0	Cstb	0	1.65265	0.989	0.745	0	4.19276e-222	2.8404	0.979	0.54	1.29275e-217	4.19276e-222	0
0	Fcgr4	0	0.854903	0.946	0.497	0	1.31048e-219	1.65797	0.875	0.224	4.0406e-215	1.31048e-219	0
0	Il1b	0	1.28475	0.965	0.684	0	4.30431e-219	2.58674	0.953	0.307	1.32715e-214	4.30431e-219	0
0	Tnfaip2	0	1.35911	0.875	0.414	0	1.16971e-218	1.95826	0.818	0.204	3.60655e-214	1.16971e-218	0
0	Nr1h3	0	0.452188	0.314	0.035	0	6.90906e-217	0.393104	0.265	0.014	2.13027e-212	6.90906e-217	0
0	Lyz2	0	1.16558	0.997	0.715	0	6.74761e-216	3.12605	0.995	0.555	2.08049e-211	6.74761e-216	0
0	Siglec1	0	0.52826	0.521	0.164	0	6.08881e-210	0.763439	0.506	0.066	1.87736e-205	6.08881e-210	0
0	Prdx5	0	1.41106	0.999	0.844	0	8.10681e-210	2.51194	0.992	0.664	2.49957e-205	8.10681e-210	0
0	Ifi30	0	0.72525	0.996	0.732	0	5.64033e-208	2.10157	0.995	0.523	1.73908e-203	5.64033e-208	0
0	Rai14	0	0.50847	0.451	0.123	0	3.84048e-204	0.567034	0.369	0.034	1.18414e-199	3.84048e-204	0
0	Vegfa	0	1.04854	0.819	0.45	0	6.4418e-202	2.24848	0.816	0.231	1.9862e-197	6.4418e-202	0
0	Rnf149	0	0.863407	0.77	0.309	0	8.03418e-200	1.03567	0.668	0.135	2.47718e-195	8.03418e-200	0
0	Csf2rb2	0	0.613072	0.913	0.509	0	3.59731e-198	1.50782	0.896	0.293	1.10916e-193	3.59731e-198	0
0	Creb5	0	0.967369	0.882	0.405	0	5.05291e-198	1.28555	0.836	0.208	1.55796e-193	5.05291e-198	0
0	Pla2g7	0	1.77699	0.955	0.394	0	3.76772e-196	1.30551	0.909	0.226	1.1617e-191	3.76772e-196	0
0	Npc2	0	0.879334	1	0.929	0	7.11479e-194	1.72146	1	0.836	2.1937e-189	7.11479e-194	0
0	Apobec1	0	1.29323	0.96	0.566	0	1.33251e-193	1.88099	0.938	0.367	4.10852e-189	1.33251e-193	0
0	Ccrl2	0	1.79312	0.949	0.556	0	1.19618e-192	2.26482	0.964	0.422	3.68818e-188	1.19618e-192	0
0	Fth1	0	1.88807	1	0.996	0	7.71081e-192	2.24917	1	0.99	2.37747e-187	7.71081e-192	0
0	Nampt	0	0.900343	0.991	0.814	0	5.4841e-189	2.03425	0.969	0.487	1.69091e-184	5.4841e-189	0
0	Tmem106a	0	0.610919	0.827	0.455	0	7.8315e-188	1.08758	0.766	0.192	2.41469e-183	7.8315e-188	0
0	Sestd1	0	0.551159	0.592	0.23	0	3.05873e-184	0.778073	0.582	0.099	9.43098e-180	3.05873e-184	0
0	Txn1	0	0.749545	0.994	0.905	0	1.22636e-183	1.98769	0.99	0.641	3.78123e-179	1.22636e-183	0
0	B2m	0	0.582147	1	0.999	0	7.63527e-179	1.59627	1	0.928	2.35418e-174	7.63527e-179	0
0	H2-DMb1	0	0.586742	0.863	0.459	0	4.36751e-178	1.07028	0.699	0.165	1.34663e-173	4.36751e-178	0
0	Tlr2	0	1.39622	0.949	0.423	0	1.0898e-175	1.54592	0.932	0.358	3.36018e-171	1.0898e-175	0
0	Igsf6	0	1.02279	0.89	0.359	0	1.05158e-172	1.18718	0.823	0.241	3.24235e-168	1.05158e-172	0
0	Rab32	0	1.01464	0.923	0.478	0	2.06355e-168	1.4749	0.927	0.373	6.36254e-164	2.06355e-168	0
0	Pilra	0	0.880163	0.596	0.148	0	2.77491e-167	1.09764	0.675	0.161	8.55589e-163	2.77491e-167	0
0	Csf2ra	0	0.744752	0.994	0.7	0	3.13481e-167	1.53578	0.992	0.559	9.66555e-163	3.13481e-167	0
0	Ctsc	0	0.948487	1	0.815	0	8.30133e-166	1.79015	0.997	0.682	2.55955e-161	8.30133e-166	0
0	Sdcbp	0	0.905473	0.998	0.874	0	1.79614e-162	1.35629	1	0.797	5.53803e-158	1.79614e-162	0
0	Ly6e	0	0.623525	1	0.962	0	2.127e-161	1.55763	1	0.778	6.55819e-157	2.127e-161	0
0	Cyba	0	0.990419	0.997	0.808	0	6.12419e-158	1.29913	0.945	0.438	1.88827e-153	6.12419e-158	0
0	Fcer1g	0	0.960103	1	0.871	0	1.47303e-154	1.29249	1	0.702	4.54179e-150	1.47303e-154	0
0	Lst1	0	0.818702	0.878	0.406	0	2.1434e-153	1.09425	0.784	0.243	6.60874e-149	2.1434e-153	0
0	Mgst1	0	0.939927	0.734	0.268	0	1.5148e-150	1.12887	0.699	0.155	4.67059e-146	1.5148e-150	0
0	Tpi1	0	1.1403	0.93	0.592	0	6.87568e-149	1.59094	0.857	0.352	2.11998e-144	6.87568e-149	0
0	Fcgr2b	0	1.37815	0.986	0.557	0	7.33981e-144	1.57524	0.992	0.626	2.26308e-139	7.33981e-144	0
0	Lgals3bp	0	0.885848	0.992	0.866	0	6.10554e-140	1.50576	0.984	0.671	1.88252e-135	6.10554e-140	0
0	Psen2	0	0.761465	0.886	0.525	0	1.4363e-139	1.01369	0.761	0.256	4.42854e-135	1.4363e-139	0
0	Hgf	0	0.551717	0.435	0.119	0	2.20031e-139	0.42618	0.265	0.025	6.78423e-135	2.20031e-139	0
0	Anxa5	0	0.645606	0.918	0.62	0	1.09396e-135	1.12943	0.904	0.385	3.37301e-131	1.09396e-135	0
0	Mif	0	0.981404	0.889	0.563	0	1.7838e-134	1.36714	0.836	0.356	5.49999e-130	1.7838e-134	0
0	A930007I19Rik	0	0.604717	0.462	0.13	0	8.83455e-132	0.721884	0.457	0.085	2.72396e-127	8.83455e-132	0
0	Gla	0	0.737079	0.681	0.309	0	8.04192e-131	0.994151	0.66	0.183	2.47956e-126	8.04192e-131	0
0	Clcn7	0	0.932229	0.847	0.4	0	2.94521e-127	0.9441	0.714	0.228	9.08097e-123	2.94521e-127	0
0	Atp6v0c	0	0.922177	0.998	0.902	0	8.86251e-126	1.02921	1	0.939	2.73258e-121	8.86251e-126	0
0	Ctsh	0	0.998481	0.998	0.681	0	7.22101e-125	1.18119	0.987	0.596	2.22645e-120	7.22101e-125	0
0	Ncapg2	0	0.619404	0.478	0.146	0	1.33742e-119	0.602485	0.403	0.071	4.12368e-115	1.33742e-119	0
0	Sh3pxd2b	0	0.50976	0.567	0.211	0	4.70432e-119	0.610868	0.577	0.134	1.45048e-114	4.70432e-119	0
0	Gapdh	0	0.784316	0.998	0.954	0	6.70945e-119	1.19121	0.992	0.921	2.06872e-114	6.70945e-119	0
0	P2rx4	0	0.713895	0.811	0.435	0	1.17401e-118	1.05018	0.79	0.304	3.61982e-114	1.17401e-118	0
0	Apoe	0	2.20261	0.994	0.725	0	1.00663e-117	1.47221	0.987	0.618	3.10373e-113	1.00663e-117	0
0	Sema4d	0	0.628147	0.985	0.853	0	5.1131e-116	1.1701	0.982	0.701	1.57652e-111	5.1131e-116	0
0	Cebpb	0	0.954991	0.986	0.644	0	2.72571e-115	1.17659	0.951	0.484	8.40417e-111	2.72571e-115	0
0	Slamf9	0	0.847706	0.733	0.289	0	4.15659e-115	1.16706	0.719	0.254	1.2816e-110	4.15659e-115	0
0	Aldoa	0	0.921159	0.994	0.93	0	4.41975e-115	1.40596	0.974	0.863	1.36274e-110	4.41975e-115	0
0	Fcgr1	0	0.627051	0.971	0.55	0	3.33201e-110	1.19421	0.94	0.507	1.02736e-105	3.33201e-110	0
0	Pkm	0	0.800736	0.992	0.885	0	2.64594e-108	1.35858	0.971	0.682	8.15824e-104	2.64594e-108	0
0	M6pr	0	0.696597	0.985	0.859	0	5.9834e-108	0.996415	0.987	0.768	1.84486e-103	5.9834e-108	0
0	Gabarap	0	0.475307	0.999	0.963	0	7.28188e-106	0.813647	1	0.942	2.24522e-101	7.28188e-106	0
0	Pgam1	0	0.760054	0.941	0.755	0	2.32262e-105	1.44814	0.948	0.662	7.16134e-101	2.32262e-105	0
0	Naip2	0	0.883386	0.843	0.416	0	3.54555e-105	0.960602	0.756	0.29	1.0932e-100	3.54555e-105	0
0	Osm	0	0.864763	0.808	0.433	0	1.43071e-103	1.36129	0.821	0.351	4.4113e-99	1.43071e-103	0
0	Soat1	0	0.797743	0.933	0.593	0	3.47679e-103	1.05234	0.958	0.576	1.072e-98	3.47679e-103	0
0	Sod2	0	1.55062	0.891	0.544	0	1.77992e-101	1.45394	0.834	0.444	5.48802e-97	1.77992e-101	0
0	Ptafr	0	1.02889	0.912	0.525	0	1.3529e-96	1.39615	0.873	0.462	4.17139e-92	1.3529e-96	0
0	Spon1	0	0.810468	0.79	0.355	0	1.36431e-96	0.704679	0.714	0.219	4.20659e-92	1.36431e-96	0
0	N4bp1	0	0.896438	0.939	0.694	0	1.00921e-95	1.06929	0.909	0.527	3.1117e-91	1.00921e-95	0
0	Itgb2	0	0.701131	0.984	0.813	0	3.12696e-95	1.12299	0.953	0.598	9.64136e-91	3.12696e-95	0
0	Cd14	0	1.51844	0.885	0.415	0	4.41477e-94	1.25293	0.912	0.492	1.3612e-89	4.41477e-94	0
0	Slc15a3	0	0.844665	0.955	0.548	0	2.28695e-91	0.904186	0.875	0.424	7.05136e-87	2.28695e-91	0
0	Hck	0	0.764426	0.979	0.588	0	6.31326e-90	0.905745	0.935	0.502	1.94657e-85	6.31326e-90	0
0	Ctsz	0	1.01213	0.997	0.692	0	6.38217e-88	0.924039	0.99	0.63	1.96782e-83	6.38217e-88	0
0	Grina	0	1.46389	0.97	0.775	0	2.75124e-87	1.18984	0.842	0.493	8.48289e-83	2.75124e-87	0
0	Plxna1	0	0.623205	0.425	0.113	0	1.24657e-86	0.712406	0.491	0.132	3.84354e-82	1.24657e-86	0
0	Nfe2l2	0	1.03834	0.993	0.799	0	6.36807e-86	0.961287	0.982	0.752	1.96347e-81	6.36807e-86	0
0	Mpeg1	0	0.743917	0.999	0.691	0	2.69932e-77	0.921843	0.997	0.618	8.32281e-73	2.69932e-77	0
0	Tgif1	0	0.67764	0.968	0.725	0	7.9621e-77	0.902775	0.94	0.556	2.45496e-72	7.9621e-77	0
0	Mcl1	0	0.695841	0.999	0.959	0	1.93879e-76	0.851082	1	0.838	5.97787e-72	1.93879e-76	0
0	Ftl1	0	1.26602	1	0.938	0	1.76003e-75	0.926293	0.992	0.836	5.42669e-71	1.76003e-75	0
0	Adam17	0	0.915728	0.946	0.655	0	1.2806e-73	0.848652	0.922	0.646	3.94847e-69	1.2806e-73	0
0	Hk3	0	0.624151	0.794	0.426	0	1.62035e-70	0.835907	0.626	0.252	4.99601e-66	1.62035e-70	0
0	Clec5a	0	0.871523	0.697	0.263	0	3.79092e-70	0.884916	0.766	0.358	1.16886e-65	3.79092e-70	0
0	Ifngr2	0	0.62494	0.938	0.604	0	9.741e-69	0.79646	0.901	0.556	3.00344e-64	9.741e-69	0
0	Arid5b	0	0.695154	0.911	0.628	0	2.7021e-67	0.82183	0.847	0.453	8.33139e-63	2.7021e-67	0
0	Ctss	0	1.25724	1	0.959	0	1.62757e-66	0.857207	1	0.8	5.01829e-62	1.62757e-66	0
0	Psap	0	1.09469	1	0.964	0	1.37029e-65	0.896121	1	0.982	4.22501e-61	1.37029e-65	0
0	Ucp2	0	0.746486	1	0.933	0	1.34714e-64	0.913535	1	0.726	4.15364e-60	1.34714e-64	0
0	Abr	0	0.745969	0.888	0.532	0	3.38408e-63	0.650972	0.74	0.348	1.04341e-58	3.38408e-63	0
0	Ptp4a1	0	0.603052	0.962	0.818	0	4.14605e-63	0.803448	0.958	0.743	1.27835e-58	4.14605e-63	0
0	Tcirg1	0	0.658528	0.953	0.631	0	1.1407e-62	0.61713	0.797	0.401	3.51711e-58	1.1407e-62	0
0	Rab20	0	0.764582	0.768	0.318	0	7.73526e-62	0.579339	0.53	0.19	2.38501e-57	7.73526e-62	0
0	Cmklr1	0	0.887844	0.87	0.344	0	1.65073e-57	0.661075	0.844	0.452	5.0897e-53	1.65073e-57	0
0	Gm10134	0	0.789654	0.623	0.16	0	9.02211e-57	0.644774	0.569	0.238	2.78179e-52	9.02211e-57	0
0	Acsl1	0	1.05031	0.719	0.301	0	2.62315e-56	0.946282	0.61	0.284	8.08796e-52	2.62315e-56	0
0	Rasgef1b	0	0.7308	0.864	0.485	0	5.65995e-55	0.745913	0.813	0.436	1.74513e-50	5.65995e-55	0
0	C3ar1	0	1.50084	0.9	0.34	0	6.06553e-50	0.781247	0.894	0.543	1.87018e-45	6.06553e-50	0
0	Lmo4	0	0.832975	0.891	0.573	0	4.77572e-49	0.872095	0.823	0.536	1.4725e-44	4.77572e-49	0
0	Ets2	0	0.76609	0.767	0.385	0	1.19972e-48	0.577003	0.725	0.371	3.6991e-44	1.19972e-48	0
0	Pid1	0	0.616102	0.794	0.408	0	2.74203e-47	0.662167	0.787	0.426	8.45451e-43	2.74203e-47	0
0	Cyp4v3	0	0.63238	0.673	0.266	0	7.00559e-45	0.46146	0.644	0.3	2.16003e-40	7.00559e-45	0
0	Dmxl2	0	0.701722	0.536	0.152	0	1.3281e-43	0.468064	0.439	0.164	4.09492e-39	1.3281e-43	0
0	Aif1	0	1.07806	0.987	0.597	0	1.08207e-41	0.6083	0.969	0.601	3.33636e-37	1.08207e-41	0
0	Slc25a37	0	0.958907	0.716	0.34	0	4.50265e-40	0.753866	0.662	0.386	1.3883e-35	4.50265e-40	0
0	Grn	0	0.968106	1	0.774	0	2.8609e-39	0.559746	0.997	0.777	8.82101e-35	2.8609e-39	0
0	Lacc1	0	0.769527	0.825	0.406	0	3.58966e-35	0.595226	0.784	0.474	1.1068e-30	3.58966e-35	0
0	Rrbp1	0	0.81585	0.996	0.815	0	6.74734e-33	0.508689	0.94	0.718	2.08041e-28	6.74734e-33	0
0	Snx18	0	0.735815	0.943	0.652	0	5.42832e-31	0.531735	0.906	0.669	1.67371e-26	5.42832e-31	0
0	Mfsd1	0	0.612962	0.867	0.536	0	1.05915e-29	0.463658	0.779	0.514	3.26569e-25	1.05915e-29	0
0	Sgk1	0	1.34469	0.786	0.418	0	1.27312e-29	0.658542	0.782	0.557	3.92542e-25	1.27312e-29	0
0	Cd68	0	1.17372	0.973	0.592	0	4.64099e-29	0.591752	0.964	0.622	1.43096e-24	4.64099e-29	0
0	Dusp1	0	0.804408	0.962	0.789	0	2.92074e-24	0.371499	0.974	0.765	9.00551e-20	2.92074e-24	0
0	Cd302	0	0.550645	0.573	0.216	0	6.31571e-22	0.347894	0.61	0.365	1.94732e-17	6.31571e-22	0
0	Lamp2	0	0.62717	0.992	0.795	0	1.10179e-21	0.334948	0.984	0.899	3.39714e-17	1.10179e-21	0
0	Slc43a2	0	0.787137	0.807	0.412	0	7.96482e-21	0.419953	0.647	0.425	2.45579e-16	7.96482e-21	0
0	Fnip2	0	0.843394	0.591	0.249	0	1.24304e-16	0.529416	0.473	0.299	3.83267e-12	1.24304e-16	0
0	Zeb2	0	0.846466	0.978	0.664	0	1.18495e-15	0.333969	0.961	0.822	3.65354e-11	1.18495e-15	0
0	Calr	0	0.721902	0.992	0.921	0	2.54023e-13	0.395382	0.987	0.957	7.83228e-09	2.54023e-13	0
0	Acp2	0	1.24978	0.883	0.368	0	2.65575e-11	0.367426	0.774	0.626	8.18846e-07	2.65575e-11	0
0	Irak3	2.97523e-305	0.47305	0.438	0.124	9.17352e-301	2.36652e-120	0.437293	0.364	0.057	7.29668e-116	2.36652e-120	5.95046e-305
0	Slc31a1	5.00699e-305	0.598057	0.797	0.44	1.5438e-300	9.90098e-57	0.717538	0.727	0.363	3.05277e-52	9.90098e-57	1.0014e-304
0	Ccr5	3.07953e-304	0.634092	0.984	0.776	9.49512e-300	4.6815e-65	0.874528	0.971	0.621	1.44345e-60	4.6815e-65	6.15906e-304
0	Snx10	4.59885e-303	0.583937	0.945	0.676	1.41796e-298	1.39665e-141	1.32255	0.958	0.545	4.30628e-137	1.39665e-141	9.19771e-303
0	Bnip3	7.79214e-297	0.715291	0.664	0.323	2.40255e-292	4.2024e-46	0.790492	0.655	0.341	1.29573e-41	4.2024e-46	1.55843e-296
0	Gbp6	1.68134e-205	0.453087	0.829	0.525	5.18409e-201	3.53373e-296	1.415	0.829	0.139	1.08956e-291	1.68134e-205	7.06747e-296
0	Ak2	1.33039e-295	0.556034	0.791	0.472	4.102e-291	1.03192e-64	0.614154	0.652	0.279	3.18171e-60	1.03192e-64	2.66078e-295
0	Spi1	6.95801e-294	0.542694	0.975	0.63	2.14536e-289	6.90445e-42	0.516227	0.922	0.557	2.12885e-37	6.90445e-42	1.3916e-293
0	Irf7	5.96765e-241	0.50756	0.977	0.733	1.84001e-236	1.10828e-291	1.8307	0.888	0.181	3.41716e-287	5.96765e-241	2.21656e-291
0	Slc31a2	1.38209e-290	0.570802	0.657	0.32	4.26138e-286	1.11513e-55	0.566496	0.577	0.237	3.43827e-51	1.11513e-55	2.76417e-290
0	Tgm2	7.77603e-290	0.4052	0.888	0.519	2.39758e-285	3.24458e-179	1.34733	0.704	0.17	1.0004e-174	3.24458e-179	1.55521e-289
0	Ier3	1.48644e-289	0.709157	0.628	0.287	4.58314e-285	9.24573e-27	0.679439	0.743	0.478	2.85074e-22	9.24573e-27	2.97288e-289
0	Isg15	4.77291e-104	0.362902	0.921	0.711	1.47163e-99	8.74795e-289	2.26335	0.938	0.209	2.69725e-284	4.77291e-104	1.74959e-288
0	Arhgap24	1.53692e-288	0.559152	0.468	0.153	4.7388e-284	1.67121e-33	0.372259	0.358	0.137	5.15285e-29	1.67121e-33	3.07385e-288
0	Peds1	3.84581e-288	0.598837	0.817	0.522	1.18578e-283	1.38053e-63	0.773575	0.784	0.422	4.25659e-59	1.38053e-63	7.69162e-288
0	Scpep1	9.52543e-288	0.564833	0.954	0.662	2.93697e-283	3.57223e-59	0.721846	0.925	0.584	1.10143e-54	3.57223e-59	1.90509e-287
0	Gm15832	3.88107e-287	0.436504	0.463	0.15	1.19665e-282	4.99563e-158	0.603311	0.452	0.069	1.5403e-153	4.99563e-158	7.76214e-287
0	Mdfic	2.78412e-283	0.591518	0.824	0.493	8.58429e-279	6.80891e-239	1.01566	0.675	0.105	2.09939e-234	6.80891e-239	5.56825e-283
0	Fam20c	3.84691e-283	0.428598	0.321	0.063	1.18612e-278	3.23767e-55	0.438899	0.319	0.083	9.98272e-51	3.23767e-55	7.69382e-283
0	Gas2l3	1.64957e-282	0.483367	0.361	0.086	5.08613e-278	1.26455e-96	0.491651	0.288	0.044	3.899e-92	1.26455e-96	3.29915e-282
0	Tpd52	5.72173e-282	0.486192	0.965	0.688	1.76418e-277	5.13191e-57	0.737198	0.935	0.639	1.58232e-52	5.13191e-57	1.14435e-281
0	Tent5c	1.00638e-281	0.802168	0.75	0.437	3.10297e-277	9.50344e-14	0.360461	0.61	0.418	2.9302e-09	9.50344e-14	2.01276e-281
0	Milr1	2.33645e-281	0.500559	0.68	0.328	7.20397e-277	3.13506e-88	0.658515	0.639	0.213	9.66632e-84	3.13506e-88	4.6729e-281
0	Slc16a3	1.85411e-279	0.549122	0.608	0.271	5.71677e-275	1.74203e-201	0.79394	0.517	0.073	5.37121e-197	1.74203e-201	3.70822e-279
0	Ccdc86	3.73475e-279	0.552312	0.735	0.396	1.15154e-274	1.93669e-64	0.590652	0.603	0.236	5.97138e-60	1.93669e-64	7.4695e-279
0	Slc3a2	6.04842e-279	0.51713	0.977	0.866	1.86491e-274	1.1236e-37	0.520997	0.956	0.791	3.4644e-33	1.1236e-37	1.20968e-278
0	Tnfrsf1b	2.07323e-278	0.736435	0.956	0.769	6.39238e-274	2.87568e-85	1.09728	0.901	0.499	8.86658e-81	2.87568e-85	4.14645e-278
0	Rsad2	1.72999e-110	0.512456	0.792	0.577	5.33409e-106	1.77264e-277	2.90502	0.834	0.165	5.46557e-273	1.72999e-110	3.54527e-277
0	Cd84	2.64563e-277	0.614127	0.807	0.478	8.15728e-273	2.62595e-31	0.469327	0.81	0.508	8.09661e-27	2.62595e-31	5.29126e-277
0	Pltp	4.17577e-277	0.654618	0.562	0.229	1.28751e-272	2.88561e-46	0.624172	0.522	0.213	8.89721e-42	2.88561e-46	8.35153e-277
0	Pgk1	1.66134e-276	0.74298	0.93	0.752	5.12241e-272	3.71307e-102	1.33622	0.894	0.544	1.14485e-97	3.71307e-102	3.32268e-276
0	Bri3	2.72906e-276	0.560032	0.914	0.679	8.41452e-272	1.03139e-23	0.444328	0.943	0.765	3.18009e-19	1.03139e-23	5.45812e-276
0	Oasl2	1.13666e-230	0.516155	0.996	0.775	3.50466e-226	3.5398e-274	2.36252	0.974	0.282	1.09143e-269	1.13666e-230	7.07959e-274
0	Slc7a2	4.28023e-274	0.891154	0.293	0.052	1.31972e-269	1.36551e-56	0.859594	0.387	0.115	4.21026e-52	1.36551e-56	8.56047e-274
0	Akr1a1	6.58023e-273	0.507247	0.99	0.865	2.02888e-268	8.67328e-64	0.705962	0.958	0.775	2.67423e-59	8.67328e-64	1.31605e-272
0	Emp3	1.12255e-272	0.526043	0.847	0.5	3.46116e-268	2.89595e-125	0.608106	0.496	0.101	8.92908e-121	2.89595e-125	2.2451e-272
0	Hk2	2.2593e-270	0.555041	0.801	0.444	6.9661e-266	5.72376e-20	0.35692	0.852	0.556	1.76481e-15	5.72376e-20	4.5186e-270
0	Ifitm3	5.52196e-270	0.641069	1	0.81	1.70259e-265	1.36063e-259	2.72879	0.99	0.356	4.19524e-255	1.36063e-259	1.10439e-269
0	Mpp1	1.56429e-269	0.563596	0.73	0.39	4.82318e-265	4.89366e-129	1.03436	0.769	0.266	1.50886e-124	4.89366e-129	3.12859e-269
0	Klf4	1.62597e-269	0.72457	0.752	0.413	5.01334e-265	2.29759e-51	0.618635	0.777	0.416	7.08415e-47	2.29759e-51	3.25193e-269
0	Ifi204	4.81405e-269	0.54831	0.99	0.684	1.48432e-264	1.04024e-244	2.21349	0.953	0.289	3.20738e-240	1.04024e-244	9.62811e-269
0	Vamp8	1.33883e-268	0.515582	0.89	0.611	4.12802e-264	5.52735e-82	0.822206	0.917	0.501	1.70425e-77	5.52735e-82	2.67767e-268
0	Fmnl2	1.77677e-268	0.636183	0.758	0.425	5.47831e-264	1.37742e-29	0.518799	0.675	0.397	4.247e-25	1.37742e-29	3.55353e-268
0	Adgb	3.40532e-268	0.480876	0.291	0.053	1.04996e-263	3.85557e-87	0.407914	0.218	0.028	1.18879e-82	3.85557e-87	6.81065e-268
0	Atp13a2	1.62191e-267	0.489502	0.605	0.274	5.00084e-263	5.85221e-30	0.329581	0.46	0.216	1.80441e-25	5.85221e-30	3.24382e-267
0	Mitf	9.59239e-266	0.515978	0.52	0.204	2.95762e-261	4.86148e-22	0.349428	0.483	0.261	1.49894e-17	4.86148e-22	1.91848e-265
0	Fyb	2.75702e-265	0.548512	0.992	0.801	8.50073e-261	6.61386e-17	0.35543	0.951	0.66	2.03925e-12	6.61386e-17	5.51405e-265
0	Ralgds	1.15935e-261	0.534239	0.54	0.221	3.57462e-257	3.0947e-30	0.316018	0.366	0.147	9.54189e-26	3.0947e-30	2.31869e-261
0	Amdhd2	8.66031e-260	0.486074	0.544	0.237	2.67023e-255	7.52621e-87	0.54548	0.481	0.128	2.32056e-82	7.52621e-87	1.73206e-259
0	Ikbke	4.09328e-259	0.505241	0.582	0.252	1.26208e-254	1.29607e-194	0.680219	0.447	0.054	3.99616e-190	1.29607e-194	8.18656e-259
0	Prdx1	6.80976e-259	0.664984	0.974	0.843	2.09965e-254	5.34082e-56	0.892066	0.969	0.811	1.64673e-51	5.34082e-56	1.36195e-258
0	Prdx6	5.8417e-258	0.803932	0.896	0.697	1.80117e-253	2.50312e-79	0.811626	0.904	0.5	7.71786e-75	2.50312e-79	1.16834e-257
0	Adam9	7.59895e-256	0.475934	0.795	0.463	2.34298e-251	2.47759e-35	0.462967	0.784	0.474	7.63916e-31	2.47759e-35	1.51979e-255
0	Rtp4	4.75892e-255	0.539685	0.972	0.745	1.46732e-250	1.11574e-203	1.68315	0.945	0.332	3.44016e-199	1.11574e-203	9.51785e-255
0	Vim	6.60821e-202	0.491579	0.978	0.792	2.03751e-197	1.701e-254	2.28765	0.977	0.281	5.24469e-250	6.60821e-202	3.402e-254
0	Cers6	1.75378e-229	0.518093	0.894	0.588	5.40744e-225	1.21054e-253	1.64728	0.888	0.217	3.73246e-249	1.75378e-229	2.42108e-253
0	Sgms2	1.60699e-252	0.387702	0.307	0.065	4.95482e-248	1.17052e-147	0.408695	0.26	0.022	3.60905e-143	1.17052e-147	3.21397e-252
0	S1pr2	3.59862e-252	0.440829	0.562	0.238	1.10956e-247	1.45584e-81	0.52844	0.509	0.143	4.48878e-77	1.45584e-81	7.19725e-252
0	Itga5	7.3489e-252	0.524254	0.709	0.369	2.26589e-247	6.57451e-94	0.79847	0.59	0.177	2.02712e-89	6.57451e-94	1.46978e-251
0	Arl11	1.66075e-250	0.410457	0.448	0.156	5.12059e-246	6.7066e-51	0.345452	0.343	0.1	2.06785e-46	6.7066e-51	3.3215e-250
0	Gngt2	4.17263e-249	0.497144	0.726	0.397	1.28655e-244	6.55203e-32	0.423539	0.603	0.317	2.02019e-27	6.55203e-32	8.34525e-249
0	Slc2a1	5.19427e-249	0.534511	0.773	0.482	1.60155e-244	6.34214e-63	0.627681	0.748	0.363	1.95547e-58	6.34214e-63	1.03885e-248
0	Marchf1	2.05858e-248	0.56933	0.787	0.457	6.34722e-244	9.71792e-19	0.320193	0.769	0.519	2.99633e-14	9.71792e-19	4.11716e-248
0	H2-DMa	1.00255e-245	0.500302	0.943	0.601	3.09117e-241	6.14076e-111	0.938113	0.769	0.286	1.89338e-106	6.14076e-111	2.00511e-245
0	Ncf2	1.01031e-245	0.419466	0.913	0.524	3.11509e-241	1.37061e-31	0.425696	0.852	0.511	4.226e-27	1.37061e-31	2.02062e-245
0	Dab2	1.40249e-245	0.460076	0.573	0.252	4.32429e-241	2.02542e-71	0.556824	0.688	0.295	6.24498e-67	2.02542e-71	2.80498e-245
0	Arpc1b	6.84333e-245	0.387572	1	0.952	2.11e-240	2.22386e-141	1.17867	0.995	0.73	6.85681e-137	2.22386e-141	1.36867e-244
0	Dse	1.16646e-243	0.47243	0.628	0.306	3.59654e-239	3.4958e-64	0.67403	0.647	0.272	1.07786e-59	3.4958e-64	2.33292e-243
0	Tifa	1.57647e-241	0.45372	0.809	0.456	4.86074e-237	1.07845e-23	0.337323	0.722	0.426	3.3252e-19	1.07845e-23	3.15295e-241
0	H2-K1	1.62708e-239	0.395245	1	0.986	5.01678e-235	7.8348e-173	1.78452	1	0.802	2.4157e-168	7.8348e-173	3.25416e-239
0	Abcg1	5.38707e-239	0.571941	0.908	0.663	1.66099e-234	2.1089e-65	0.832425	0.829	0.444	6.50237e-61	2.1089e-65	1.07741e-238
0	Bach2os	1.87805e-238	0.388766	0.323	0.081	5.7906e-234	6.84698e-53	0.336656	0.273	0.065	2.11113e-48	6.84698e-53	3.7561e-238
0	Irf2bp2	3.72128e-238	0.492988	0.985	0.824	1.14738e-233	1.72131e-52	0.622748	0.99	0.879	5.30732e-48	1.72131e-52	7.44257e-238
0	Trps1	3.92616e-238	0.563602	0.795	0.477	1.21055e-233	3.8876e-104	0.916467	0.766	0.261	1.19866e-99	3.8876e-104	7.85233e-238
0	Mapkapk3	1.9873e-235	0.49868	0.802	0.494	6.12745e-231	1.18805e-177	0.909659	0.673	0.143	3.66311e-173	1.18805e-177	3.97461e-235
0	Pygl	5.22738e-235	0.433296	0.511	0.205	1.61176e-230	3.78143e-222	0.75925	0.504	0.061	1.16593e-217	3.78143e-222	1.04548e-234
0	Sdc3	4.96341e-234	0.466957	0.962	0.662	1.53037e-229	2.01385e-58	0.50989	0.917	0.536	6.2093e-54	2.01385e-58	9.92682e-234
0	Tyrobp	1.69541e-233	0.519	1	0.818	5.22747e-229	4.5484e-29	0.530463	1	0.689	1.40241e-24	4.5484e-29	3.39083e-233
0	Plekho2	1.8601e-233	0.489785	0.907	0.624	5.73525e-229	2.42661e-38	0.498764	0.847	0.516	7.48196e-34	2.42661e-38	3.7202e-233
0	Ifi207	1.30547e-212	0.444628	0.945	0.579	4.02517e-208	9.60578e-233	1.576	0.927	0.227	2.96175e-228	1.30547e-212	1.92116e-232
0	Nlrc4	9.91753e-233	0.418698	0.456	0.167	3.05787e-228	4.65223e-217	0.580907	0.395	0.036	1.43442e-212	4.65223e-217	1.98351e-232
0	Gusb	6.5895e-232	0.483679	0.782	0.471	2.03174e-227	1.1734e-18	0.319374	0.805	0.546	3.61795e-14	1.1734e-18	1.3179e-231
0	Ptpn6	6.92667e-232	0.477891	0.977	0.735	2.1357e-227	1.44774e-63	0.795925	0.943	0.579	4.46382e-59	1.44774e-63	1.38533e-231
0	Cndp2	2.21693e-231	0.529138	0.836	0.572	6.83546e-227	1.17217e-22	0.390692	0.795	0.555	3.61416e-18	1.17217e-22	4.43386e-231
0	Fgl2	1.02221e-199	0.469079	0.992	0.802	3.15177e-195	5.29948e-231	2.10744	0.951	0.289	1.63399e-226	1.02221e-199	1.0599e-230
0	Slc16a10	1.32206e-230	0.475957	0.512	0.211	4.07632e-226	2.22833e-24	0.329246	0.403	0.189	6.87062e-20	2.22833e-24	2.64413e-230
0	Rnf19b	2.41378e-230	0.541083	0.938	0.739	7.4424e-226	4.84473e-38	0.526706	0.891	0.586	1.49378e-33	4.84473e-38	4.82755e-230
0	Jag1	7.21674e-230	0.360669	0.272	0.053	2.22514e-225	1.35908e-109	0.627598	0.39	0.071	4.19045e-105	1.35908e-109	1.44335e-229
0	Arhgef10l	1.5891e-229	0.371453	0.511	0.203	4.89968e-225	3.11324e-40	0.352217	0.384	0.135	9.59905e-36	3.11324e-40	3.17821e-229
0	Themis2	1.44363e-227	0.484232	0.95	0.608	4.45116e-223	1.92316e-104	1.06059	0.881	0.411	5.92968e-100	1.92316e-104	2.88727e-227
0	Pgd	4.65737e-227	0.440055	0.858	0.563	1.43601e-222	1.63532e-66	0.689378	0.818	0.438	5.04219e-62	1.63532e-66	9.31475e-227
0	Olr1	6.44442e-136	0.535954	0.236	0.072	1.98701e-131	3.29309e-226	0.813741	0.299	0.018	1.01536e-221	6.44442e-136	6.58618e-226
0	Dynlt2b	2.79208e-225	0.39491	0.594	0.285	8.60881e-221	2.76647e-110	0.727141	0.608	0.176	8.52986e-106	2.76647e-110	5.58415e-225
0	Scarf1	7.98106e-207	0.323673	0.318	0.088	2.4608e-202	1.10659e-224	0.387629	0.242	0.01	3.41194e-220	7.98106e-207	2.21317e-224
0	Pnp	2.80274e-224	0.420683	0.99	0.756	8.64169e-220	2.07674e-124	1.3131	0.982	0.694	6.40321e-120	2.07674e-124	5.60548e-224
0	Tmem219	2.59003e-223	0.448492	0.835	0.542	7.98583e-219	5.22081e-84	0.772382	0.816	0.372	1.60973e-79	5.22081e-84	5.18006e-223
0	Clec4a1	1.44005e-221	0.50174	0.53	0.22	4.4401e-217	2.59199e-171	1.10514	0.626	0.126	7.99189e-167	2.59199e-171	2.88009e-221
0	Rbm47	2.1629e-221	0.492819	0.735	0.424	6.66888e-217	5.49374e-58	0.676752	0.761	0.383	1.69388e-53	5.49374e-58	4.32581e-221
0	Luzp1	3.05598e-221	0.44813	0.574	0.274	9.4225e-217	2.68301e-25	0.33768	0.447	0.212	8.27251e-21	2.68301e-25	6.11196e-221
0	Nadk	3.80328e-221	0.496517	0.804	0.533	1.17267e-216	1.74063e-39	0.554814	0.696	0.403	5.36689e-35	1.74063e-39	7.60656e-221
0	Ldha	4.23774e-220	0.566857	0.946	0.775	1.30662e-215	2.7185e-103	1.18373	0.896	0.525	8.38196e-99	2.7185e-103	8.47548e-220
0	Plekhf2	1.08788e-219	0.449057	0.85	0.55	3.35427e-215	2.4328e-97	1.00702	0.842	0.418	7.50105e-93	2.4328e-97	2.17576e-219
0	Cd38	1.33406e-219	0.718487	0.54	0.259	4.11331e-215	3.16443e-65	0.523918	0.501	0.149	9.75689e-61	3.16443e-65	2.66812e-219
0	Cnih4	4.01292e-217	0.456271	0.787	0.51	1.2373e-212	1.40338e-52	0.629037	0.795	0.459	4.32705e-48	1.40338e-52	8.02584e-217
0	Tnfaip8l3	3.96516e-211	0.321315	0.236	0.041	1.22258e-206	5.60865e-216	0.564718	0.322	0.023	1.72932e-211	3.96516e-211	1.12173e-215
0	Myo1f	5.45352e-214	0.46982	0.924	0.65	1.68148e-209	8.68046e-54	0.598937	0.86	0.469	2.67645e-49	8.68046e-54	1.0907e-213
0	Phf11d	2.07825e-181	0.459368	0.761	0.457	6.40786e-177	2.6007e-213	1.39871	0.761	0.167	8.01875e-209	2.07825e-181	5.20141e-213
0	Rap2b	4.73232e-212	0.395509	0.761	0.459	1.45912e-207	2.77675e-37	0.469473	0.678	0.361	8.56157e-33	2.77675e-37	9.46465e-212
0	Cd274	3.99632e-208	0.643832	0.915	0.742	1.23219e-203	9.15997e-194	1.90779	0.852	0.256	2.82429e-189	9.15997e-194	7.99265e-208
0	Prkcd	6.6747e-208	0.443781	0.968	0.727	2.05801e-203	3.18213e-55	0.722986	0.964	0.662	9.81147e-51	3.18213e-55	1.33494e-207
0	Alas1	1.74577e-207	0.431654	0.554	0.269	5.38274e-203	1.36483e-40	0.465015	0.442	0.182	4.20817e-36	1.36483e-40	3.49155e-207
0	Gpx1	1.96849e-205	0.434625	0.981	0.758	6.06944e-201	1.63662e-78	0.973531	0.912	0.578	5.04618e-74	1.63662e-78	3.93698e-205
0	Csf2rb	6.94131e-205	0.390564	0.97	0.622	2.14021e-200	1.97523e-183	1.70311	0.969	0.448	6.09021e-179	1.97523e-183	1.38826e-204
0	Rest	1.99204e-203	0.607154	0.709	0.443	6.14207e-199	1.08541e-79	0.915076	0.701	0.294	3.34664e-75	1.08541e-79	3.98409e-203
0	Cysltr1	6.83605e-203	0.416885	0.583	0.283	2.10776e-198	6.04557e-37	0.53067	0.647	0.341	1.86403e-32	6.04557e-37	1.36721e-202
0	Sema4a	7.13708e-115	0.33197	0.878	0.647	2.20057e-110	6.46753e-202	1.00063	0.787	0.173	1.99413e-197	7.13708e-115	1.29351e-201
0	Gpnmb	1.39762e-201	1.98011	0.278	0.074	4.30929e-197	5.81199e-200	1.92069	0.26	0.015	1.79201e-195	5.81199e-200	2.79524e-201
0	Prdm1	1.52088e-199	0.589659	0.621	0.335	4.68932e-195	2.46576e-65	0.743634	0.488	0.164	7.60267e-61	2.46576e-65	3.04175e-199
0	Lipa	1.99947e-199	0.626234	0.739	0.473	6.16498e-195	2.19187e-28	0.665423	0.745	0.528	6.75819e-24	2.19187e-28	3.99895e-199
0	Capza2	5.02606e-199	0.388271	0.993	0.889	1.54969e-194	3.68175e-42	0.534719	0.995	0.837	1.13519e-37	3.68175e-42	1.00521e-198
0	Cd93	2.01537e-198	0.62994	0.398	0.148	6.21398e-194	1.64961e-140	0.648206	0.332	0.039	5.08625e-136	1.64961e-140	4.03074e-198
0	Clec4a3	1.18414e-197	0.440038	0.571	0.268	3.65105e-193	1.40976e-62	0.850799	0.665	0.298	4.3467e-58	1.40976e-62	2.36827e-197
0	Adipor1	3.28006e-197	0.431653	0.885	0.672	1.01134e-192	1.06698e-14	0.318767	0.86	0.672	3.28981e-10	1.06698e-14	6.56012e-197
0	Ddhd1	2.67777e-196	0.625885	0.64	0.375	8.25637e-192	3.17726e-45	0.68672	0.657	0.329	9.79646e-41	3.17726e-45	5.35554e-196
0	Eno1	5.64884e-196	0.475025	0.876	0.651	1.74171e-191	5.60857e-76	0.891283	0.847	0.45	1.72929e-71	5.60857e-76	1.12977e-195
0	Bcl2a1a	4.82245e-195	0.425121	0.547	0.256	1.48691e-190	9.98054e-177	1.04299	0.657	0.138	3.0773e-172	9.98054e-177	9.6449e-195
0	Atp1a3	1.52305e-194	0.309262	0.637	0.313	4.69602e-190	7.18993e-64	0.473823	0.626	0.238	2.21687e-59	7.18993e-64	3.0461e-194
0	Osbpl3	1.99726e-194	0.496623	0.562	0.279	6.15815e-190	1.06588e-76	0.59614	0.444	0.119	3.28642e-72	1.06588e-76	3.99452e-194
0	Gna13	4.07082e-194	0.475512	0.984	0.913	1.25516e-189	1.50189e-26	0.452883	0.969	0.85	4.63077e-22	1.50189e-26	8.14165e-194
0	1600014C10Rik	1.19347e-183	0.370326	0.949	0.678	3.67982e-179	1.83129e-191	1.40601	0.891	0.303	5.64641e-187	1.19347e-183	3.66258e-191
0	Atp6v1b2	2.00664e-191	0.419686	0.939	0.734	6.18709e-187	6.78094e-66	0.765943	0.94	0.657	2.09077e-61	6.78094e-66	4.01329e-191
0	Ifi44	8.93801e-73	0.310097	0.481	0.296	2.75586e-68	2.25667e-191	1.31862	0.501	0.071	6.95799e-187	8.93801e-73	4.51334e-191
0	Cdkn1a	1.09849e-190	0.450346	0.927	0.662	3.38696e-186	3.25704e-123	1.30452	0.914	0.411	1.00424e-118	3.25704e-123	2.19697e-190
0	Cd52	3.20304e-105	0.311171	1	0.94	9.87594e-101	6.0645e-189	2.10532	0.997	0.595	1.86987e-184	3.20304e-105	1.2129e-188
0	Tmed10	7.75593e-189	0.391851	0.977	0.851	2.39138e-184	4.3069e-19	0.314774	0.966	0.881	1.32795e-14	4.3069e-19	1.55119e-188
0	Rab7	3.97082e-186	0.365152	0.99	0.912	1.22432e-181	4.84544e-45	0.516896	0.992	0.924	1.49399e-40	4.84544e-45	7.94165e-186
0	Gbp3	1.78324e-124	0.33817	0.883	0.648	5.49826e-120	1.89325e-184	1.47838	0.873	0.278	5.83745e-180	1.78324e-124	3.78649e-184
0	Gpr65	3.73361e-183	0.57952	0.828	0.598	1.15118e-178	1.28572e-124	1.14203	0.756	0.247	3.96426e-120	1.28572e-124	7.46722e-183
0	Gm4951	1.8279e-182	0.490606	0.734	0.429	5.63597e-178	1.65984e-87	0.87743	0.629	0.209	5.11777e-83	1.65984e-87	3.65581e-182
0	Furin	4.1607e-182	0.413761	0.801	0.537	1.28287e-177	2.22665e-64	0.78115	0.769	0.394	6.86541e-60	2.22665e-64	8.32139e-182
0	Adamtsl4	2.5527e-181	0.323022	0.402	0.151	7.87073e-177	9.50949e-72	0.438299	0.325	0.07	2.93206e-67	9.50949e-72	5.1054e-181
0	Agtrap	4.65695e-181	0.449947	0.633	0.367	1.43588e-176	1.34345e-61	0.537498	0.522	0.184	4.14225e-57	1.34345e-61	9.31389e-181
0	Il10rb	5.945e-181	0.431431	0.826	0.581	1.83302e-176	1.18109e-34	0.478779	0.792	0.483	3.64165e-30	1.18109e-34	1.189e-180
0	Ggh	9.9925e-181	0.383922	0.558	0.295	3.08099e-176	7.80722e-27	0.419026	0.54	0.302	2.4072e-22	7.80722e-27	1.9985e-180
0	Nrp2	1.9084e-180	0.465036	0.38	0.148	5.88418e-176	1.37262e-11	0.315042	0.473	0.309	4.23219e-07	1.37262e-11	3.81681e-180
0	Rassf4	6.92075e-179	0.388362	0.815	0.51	2.13387e-174	7.19749e-33	0.505479	0.751	0.442	2.2192e-28	7.19749e-33	1.38415e-178
0	Iigp1	2.49024e-110	0.383409	0.884	0.67	7.67815e-106	7.8902e-179	1.61054	0.777	0.188	2.43279e-174	2.49024e-110	1.57804e-178
0	H3f3b	1.15769e-178	0.380392	1	0.994	3.5695e-174	3.23187e-66	0.762326	1	0.954	9.96484e-62	3.23187e-66	2.31538e-178
0	Saa3	5.51079e-103	1.21585	0.174	0.051	1.69914e-98	2.0852e-178	1.32885	0.153	0.004	6.42928e-174	5.51079e-103	4.17039e-178
0	Dapk1	1.58111e-177	0.39353	0.566	0.292	4.87504e-173	8.10195e-62	0.474043	0.53	0.179	2.49807e-57	8.10195e-62	3.16222e-177
0	Parp10	1.43404e-176	0.481578	0.707	0.453	4.42158e-172	1.15451e-155	0.678338	0.442	0.067	3.55971e-151	1.15451e-155	2.86808e-176
0	Atp2b1	4.18138e-176	0.46598	0.937	0.782	1.28925e-171	5.63683e-20	0.482271	0.901	0.795	1.738e-15	5.63683e-20	8.36277e-176
0	C1rl	2.03725e-175	0.341549	0.333	0.114	6.28146e-171	1.49145e-64	0.408582	0.288	0.063	4.59858e-60	1.49145e-64	4.0745e-175
0	Slc6a6	5.96343e-174	0.414958	0.94	0.762	1.83871e-169	2.01282e-29	0.453339	0.943	0.763	6.20613e-25	2.01282e-29	1.19269e-173
0	Tapbp	1.17073e-173	0.371342	0.999	0.966	3.60972e-169	2.63127e-164	1.56635	0.995	0.793	8.11299e-160	2.63127e-164	2.34146e-173
0	Rhog	4.55807e-172	0.354349	0.997	0.922	1.40539e-167	1.17643e-53	0.628651	0.99	0.803	3.6273e-49	1.17643e-53	9.11614e-172
0	Gng12	6.03369e-171	0.416519	0.808	0.525	1.86037e-166	7.70207e-15	0.333307	0.808	0.613	2.37478e-10	7.70207e-15	1.20674e-170
0	Il13ra1	8.15263e-171	0.338364	0.662	0.364	2.5137e-166	2.64958e-42	0.481838	0.655	0.317	8.16946e-38	2.64958e-42	1.63053e-170
0	Slc30a1	8.37965e-171	0.467799	0.612	0.34	2.5837e-166	1.52122e-44	0.61353	0.496	0.211	4.69036e-40	1.52122e-44	1.67593e-170
0	Rasa4	3.97117e-169	0.376369	0.762	0.47	1.22443e-164	1.39024e-85	0.675182	0.647	0.221	4.28654e-81	1.39024e-85	7.94234e-169
0	Pstpip2	7.37122e-169	0.384933	0.444	0.193	2.27277e-164	2.15138e-47	0.405244	0.312	0.088	6.63334e-43	2.15138e-47	1.47424e-168
0	Cxcl9	8.95756e-160	0.828045	0.704	0.465	2.76188e-155	1.8603e-168	2.06058	0.369	0.042	5.73588e-164	8.95756e-160	3.72061e-168
0	Haus8	2.75785e-168	0.409084	0.511	0.256	8.50327e-164	5.32131e-60	0.43894	0.332	0.088	1.64072e-55	5.32131e-60	5.51569e-168
0	Batf2	3.09387e-145	0.331773	0.452	0.216	9.53934e-141	1.1147e-167	0.516852	0.374	0.044	3.43694e-163	3.09387e-145	2.22939e-167
0	Alox5ap	3.53262e-167	0.341398	0.962	0.61	1.08921e-162	1.47085e-77	0.98425	0.912	0.544	4.53508e-73	1.47085e-77	7.06525e-167
0	Gab2	8.0248e-167	0.429039	0.771	0.493	2.47429e-162	1.51508e-20	0.400147	0.735	0.48	4.67146e-16	1.51508e-20	1.60496e-166
0	Gsap	1.42005e-166	0.442059	0.77	0.519	4.37845e-162	8.16116e-88	0.786182	0.761	0.303	2.51633e-83	8.16116e-88	2.84011e-166
0	P4ha1	3.54847e-166	0.392368	0.739	0.473	1.0941e-161	2.24741e-17	0.370288	0.784	0.596	6.92945e-13	2.24741e-17	7.09694e-166
0	Gk	4.45194e-165	0.452279	0.473	0.228	1.37267e-160	3.91972e-26	0.367833	0.345	0.145	1.20857e-21	3.91972e-26	8.90388e-165
0	Arl5c	1.88431e-164	0.353498	0.637	0.346	5.8099e-160	8.74787e-30	0.40917	0.457	0.207	2.69723e-25	8.74787e-30	3.76863e-164
0	Ifrd1	5.63951e-163	0.480734	0.924	0.755	1.73883e-158	4.22157e-27	0.508504	0.925	0.706	1.30164e-22	4.22157e-27	1.1279e-162
0	Man2a1	4.69233e-162	0.421678	0.81	0.561	1.44678e-157	1.31409e-81	0.799032	0.779	0.341	4.05172e-77	1.31409e-81	9.38465e-162
0	Hif1a	7.19134e-162	0.45307	0.933	0.778	2.21731e-157	1.55592e-102	1.17902	0.914	0.542	4.79737e-98	1.55592e-102	1.43827e-161
0	Svbp	7.37663e-162	0.379665	0.696	0.43	2.27444e-157	3.0132e-48	0.417939	0.512	0.201	9.2906e-44	3.0132e-48	1.47533e-161
0	Sh3bp2	3.49617e-160	0.341857	0.62	0.349	1.07798e-155	3.5918e-55	0.434392	0.509	0.186	1.10746e-50	3.5918e-55	6.99235e-160
0	Rapgef2	4.0808e-160	0.48855	0.692	0.439	1.25823e-155	1.38506e-31	0.598083	0.634	0.362	4.27056e-27	1.38506e-31	8.1616e-160
0	Sppl2a	1.29172e-157	0.364765	0.976	0.84	3.98275e-153	5.77211e-82	0.937778	0.982	0.764	1.77972e-77	5.77211e-82	2.58343e-157
0	Pip5k1c	2.65657e-157	0.357831	0.885	0.64	8.19101e-153	4.16909e-36	0.522227	0.792	0.491	1.28546e-31	4.16909e-36	5.31315e-157
0	Gsto1	1.92313e-156	0.374077	0.54	0.294	5.92959e-152	5.28523e-61	0.63932	0.618	0.266	1.6296e-56	5.28523e-61	3.84626e-156
0	Trib1	3.04537e-155	0.404278	0.836	0.554	9.38978e-151	2.53592e-52	0.732202	0.818	0.468	7.81899e-48	2.53592e-52	6.09073e-155
0	Tifab	9.63331e-155	0.341503	0.774	0.457	2.97024e-150	3.44622e-28	0.502616	0.722	0.449	1.06257e-23	3.44622e-28	1.92666e-154
0	Crlf2	1.78078e-151	0.338574	0.694	0.427	5.49069e-147	7.46681e-43	0.338918	0.384	0.135	2.30224e-38	7.46681e-43	3.56157e-151
0	Bst2	1.00319e-150	0.435544	0.939	0.757	3.09314e-146	2.47166e-140	1.16931	0.873	0.331	7.62088e-136	2.47166e-140	2.00638e-150
0	Psmb10	1.02101e-150	0.367906	0.931	0.743	3.14808e-146	2.72284e-130	0.962733	0.823	0.297	8.39534e-126	2.72284e-130	2.04202e-150
0	Tuba1c	1.31588e-150	0.382288	0.805	0.566	4.05724e-146	2.54893e-39	0.492313	0.722	0.397	7.85912e-35	2.54893e-39	2.63175e-150
0	Smim3	1.40048e-150	0.377154	0.747	0.47	4.31809e-146	2.78558e-41	0.536562	0.727	0.369	8.58879e-37	2.78558e-41	2.80095e-150
0	Cpt1a	1.08094e-149	0.351975	0.755	0.498	3.33285e-145	2.31337e-35	0.446036	0.761	0.449	7.13283e-31	2.31337e-35	2.16187e-149
0	Arrdc4	1.09898e-149	0.371636	0.664	0.402	3.38847e-145	8.67556e-119	0.803748	0.613	0.163	2.67493e-114	8.67556e-119	2.19795e-149
0	Gsdmd	1.66931e-149	0.346502	0.876	0.621	5.14699e-145	3.69686e-86	0.724235	0.758	0.308	1.13985e-81	3.69686e-86	3.33862e-149
0	Lat2	2.65843e-149	0.42308	0.778	0.517	8.19674e-145	2.96802e-34	0.539607	0.758	0.423	9.1513e-30	2.96802e-34	5.31686e-149
0	ENSMUSG00000120076	2.9724e-149	0.345021	0.274	0.087	9.16481e-145	1.90139e-68	0.42313	0.234	0.04	5.86255e-64	1.90139e-68	5.9448e-149
0	Gpi1	1.21899e-147	0.41004	0.883	0.701	3.75851e-143	2.40971e-58	0.708406	0.844	0.504	7.42986e-54	2.40971e-58	2.43798e-147
0	Abracl	1.54183e-147	0.35455	0.833	0.591	4.75394e-143	9.26394e-136	1.07229	0.857	0.339	2.85635e-131	9.26394e-136	3.08367e-147
0	Srd5a3	7.85033e-147	0.356096	0.678	0.436	2.42049e-142	6.67388e-40	0.482778	0.686	0.37	2.05776e-35	6.67388e-40	1.57007e-146
0	Ero1a	5.12522e-146	0.457005	0.641	0.398	1.58026e-141	9.20828e-46	0.603647	0.551	0.244	2.83919e-41	9.20828e-46	1.02504e-145
0	Cmtm7	1.70027e-143	0.349999	0.873	0.625	5.24245e-139	3.70037e-28	0.384237	0.725	0.423	1.14094e-23	3.70037e-28	3.40054e-143
0	Nlrp1b	5.62377e-143	0.348318	0.623	0.358	1.73398e-138	1.20411e-28	0.302133	0.447	0.198	3.71263e-24	1.20411e-28	1.12475e-142
0	Tent5a	5.77555e-143	0.41718	0.852	0.598	1.78077e-138	2.08137e-35	0.500331	0.847	0.507	6.41748e-31	2.08137e-35	1.15511e-142
0	Bnip2	1.9505e-140	0.339938	0.908	0.719	6.01398e-136	4.67085e-27	0.406818	0.875	0.614	1.44016e-22	4.67085e-27	3.901e-140
0	Smn1	2.04824e-140	0.329838	0.521	0.286	6.31533e-136	9.5957e-33	0.383482	0.465	0.212	2.95864e-28	9.5957e-33	4.09647e-140
0	Skap2	2.61458e-139	0.346578	0.94	0.689	8.06155e-135	9.08421e-29	0.416598	0.891	0.596	2.80093e-24	9.08421e-29	5.22917e-139
0	Litaf	4.57113e-139	0.368527	0.973	0.829	1.40942e-134	4.17414e-44	0.630892	0.951	0.697	1.28701e-39	4.17414e-44	9.14226e-139
0	Plau	1.95686e-138	0.474414	0.296	0.109	6.03358e-134	0.000551265	0.355992	0.255	0.187	1	0.000551265	3.91371e-138
0	Ccdc71l	5.20879e-138	0.339407	0.544	0.308	1.60603e-133	4.86755e-36	0.457373	0.535	0.253	1.50081e-31	4.86755e-36	1.04176e-137
0	Slc38a6	2.47177e-137	0.38877	0.369	0.164	7.6212e-133	2.8632e-14	0.301177	0.377	0.213	8.82812e-10	2.8632e-14	4.94353e-137
0	Znfx1	2.83919e-135	0.383005	0.883	0.653	8.75407e-131	1.46729e-98	1.07038	0.844	0.417	4.52408e-94	1.46729e-98	5.67838e-135
0	Slc2a6	1.66871e-134	0.349515	0.412	0.199	5.14514e-130	5.17342e-72	0.401999	0.283	0.057	1.59512e-67	5.17342e-72	3.33742e-134
0	Dnase1l3	5.76838e-134	0.308063	0.417	0.194	1.77857e-129	1.98917e-57	0.455406	0.197	0.034	6.1332e-53	1.98917e-57	1.15368e-133
0	Rbm7	7.64961e-131	0.365168	0.792	0.584	2.35861e-126	1.07498e-24	0.417359	0.686	0.43	3.31448e-20	1.07498e-24	1.52992e-130
0	Tmem14c	1.49044e-130	0.341708	0.85	0.649	4.59546e-126	2.32579e-41	0.562285	0.818	0.52	7.1711e-37	2.32579e-41	2.98087e-130
0	Slc39a1	1.39788e-127	0.322341	0.806	0.582	4.31009e-123	8.71022e-20	0.355477	0.836	0.626	2.68562e-15	8.71022e-20	2.79576e-127
0	Hcls1	9.33297e-127	0.348644	0.915	0.706	2.87763e-122	4.37337e-45	0.549813	0.753	0.411	1.34844e-40	4.37337e-45	1.86659e-126
0	Sem1	2.2367e-126	0.305346	0.943	0.79	6.89643e-122	7.33459e-104	0.913193	0.956	0.593	2.26147e-99	7.33459e-104	4.47341e-126
0	Inhba	5.21763e-126	0.810536	0.145	0.025	1.60875e-121	6.46989e-78	1.16432	0.195	0.026	1.99486e-73	6.46989e-78	1.04353e-125
0	Vdac2	2.41563e-125	0.316465	0.936	0.797	7.44813e-121	1.20894e-24	0.414159	0.945	0.767	3.72753e-20	1.20894e-24	4.83127e-125
0	Mdm2	1.80514e-124	0.42374	0.78	0.576	5.5658e-120	1.20466e-17	0.393796	0.655	0.451	3.71433e-13	1.20466e-17	3.61029e-124
0	Rexo2	1.35467e-123	0.314021	0.726	0.487	4.17686e-119	2.47937e-33	0.48519	0.769	0.469	7.64464e-29	2.47937e-33	2.70935e-123
0	Cept1	1.73816e-123	0.324759	0.767	0.534	5.35927e-119	5.68146e-30	0.455088	0.73	0.439	1.75176e-25	5.68146e-30	3.47632e-123
0	Tiparp	2.33831e-123	0.378966	0.723	0.491	7.20971e-119	3.25574e-29	0.490234	0.683	0.414	1.00384e-24	3.25574e-29	4.67662e-123
0	Pde7b	2.13266e-122	0.332683	0.439	0.217	6.57563e-118	1.41277e-104	0.614055	0.361	0.063	4.35599e-100	1.41277e-104	4.26532e-122
0	Mir22hg	1.93326e-121	0.302907	0.622	0.381	5.96082e-117	1.71474e-42	0.4149	0.457	0.182	5.28707e-38	1.71474e-42	3.86652e-121
0	Fbxl5	6.47131e-120	0.593014	0.68	0.488	1.9953e-115	1.30606e-22	0.473708	0.595	0.36	4.02696e-18	1.30606e-22	1.29426e-119
0	Nfkbie	2.20464e-119	0.481942	0.784	0.583	6.79756e-115	1.00282e-107	1.37124	0.714	0.272	3.092e-103	1.00282e-107	4.40928e-119
0	Elk3	1.43485e-118	0.306637	0.791	0.552	4.42407e-114	8.19665e-16	0.332332	0.704	0.487	2.52727e-11	8.19665e-16	2.8697e-118
0	Smpdl3a	6.02556e-118	0.312543	0.752	0.5	1.85786e-113	3.87544e-115	0.944377	0.719	0.228	1.19491e-110	3.87544e-115	1.20511e-117
0	Sav1	2.2799e-116	0.312989	0.712	0.487	7.02962e-112	3.35204e-63	0.666723	0.738	0.351	1.03353e-58	3.35204e-63	4.5598e-116
0	Tep1	1.48088e-115	0.307097	0.619	0.387	4.56601e-111	1.14479e-47	0.512516	0.569	0.25	3.52973e-43	1.14479e-47	2.96177e-115
0	Prelid1	7.72217e-115	0.305139	0.911	0.743	2.38098e-110	1.2729e-64	0.520934	0.553	0.203	3.92475e-60	1.2729e-64	1.54443e-114
0	Myo9b	9.83963e-114	0.300978	0.778	0.564	3.03385e-109	2.72389e-32	0.42246	0.644	0.35	8.39856e-28	2.72389e-32	1.96793e-113
0	Irak2	2.23949e-110	0.320394	0.848	0.646	6.90502e-106	3.95857e-34	0.561066	0.823	0.547	1.22055e-29	3.95857e-34	4.47898e-110
0	Bax	2.93558e-108	0.316238	0.77	0.578	9.05127e-104	6.42098e-22	0.323842	0.686	0.422	1.97978e-17	6.42098e-22	5.87116e-108
0	Hspa5	2.02623e-107	0.459576	0.992	0.965	6.24747e-103	7.1724e-13	0.56183	0.984	0.956	2.21147e-08	7.1724e-13	4.05246e-107
0	Ptpn1	3.43106e-107	0.302419	0.961	0.818	1.0579e-102	5.44399e-27	0.490236	0.912	0.667	1.67855e-22	5.44399e-27	6.86211e-107
0	Arl4c	5.16373e-107	0.357572	0.927	0.751	1.59213e-102	1.31333e-22	0.433178	0.883	0.664	4.04939e-18	1.31333e-22	1.03275e-106
0	F830016B08Rik	2.3349e-106	0.465398	0.383	0.197	7.19921e-102	1.55529e-15	0.326164	0.2	0.083	4.79542e-11	1.55529e-15	4.66981e-106
0	Cxcl2	1.84585e-103	0.521206	0.16	0.042	5.69129e-99	2.28015e-37	0.562307	0.208	0.052	7.03038e-33	2.28015e-37	3.69169e-103
0	Ly9	1.17993e-100	0.304868	0.605	0.379	3.63806e-96	1.43261e-26	0.403719	0.509	0.256	4.41715e-22	1.43261e-26	2.35985e-100
0	Rgs2	1.30032e-100	0.384487	0.939	0.787	4.00929e-96	2.27426e-19	0.380208	0.888	0.658	7.01223e-15	2.27426e-19	2.60065e-100
0	Vasp	1.87336e-100	0.335318	0.977	0.881	5.77612e-96	5.54046e-81	0.985813	0.956	0.676	1.70829e-76	5.54046e-81	3.74671e-100
0	Gsr	2.66715e-100	0.303117	0.539	0.34	8.22361e-96	2.67704e-76	0.747616	0.626	0.239	8.25411e-72	2.67704e-76	5.33429e-100
0	Cited2	2.58706e-99	0.533802	0.796	0.608	7.97669e-95	4.60135e-26	0.501261	0.813	0.551	1.41874e-21	4.60135e-26	5.17412e-99
0	Nceh1	3.55728e-98	0.347248	0.485	0.296	1.09682e-93	2.81073e-51	0.494314	0.564	0.228	8.66632e-47	2.81073e-51	7.11456e-98
0	Sdf2l1	8.02052e-96	0.326115	0.507	0.31	2.47297e-91	2.17224e-22	0.45904	0.525	0.298	6.69767e-18	2.17224e-22	1.6041e-95
0	Atp6v1a	7.85745e-91	0.316	0.838	0.667	2.42269e-86	1.60933e-12	0.323987	0.847	0.684	4.96204e-08	1.60933e-12	1.57149e-90
0	Ndel1	4.6822e-90	0.301909	0.784	0.598	1.44366e-85	6.94672e-18	0.403069	0.67	0.461	2.14188e-13	6.94672e-18	9.3644e-90
0	Zfas1	4.10497e-85	0.384474	0.896	0.789	1.26568e-80	2.09986e-68	0.959778	0.906	0.583	6.4745e-64	2.09986e-68	8.20993e-85
0	Esd	1.88815e-83	0.313734	0.801	0.622	5.82174e-79	1.64461e-64	0.81815	0.743	0.383	5.07083e-60	1.64461e-64	3.77631e-83
0	Ell2	1.91964e-82	0.335824	0.619	0.429	5.91883e-78	4.24648e-15	0.380388	0.486	0.308	1.30932e-10	4.24648e-15	3.83928e-82
0	Vmp1	4.09603e-73	0.309567	0.979	0.916	1.26293e-68	2.9488e-32	0.552902	0.953	0.799	9.09204e-28	2.9488e-32	8.19206e-73
0	Fabp5	2.64502e-31	0.751039	0.34	0.245	8.1554e-27	2.6413e-07	0.695507	0.418	0.294	0.00814391	2.6413e-07	5.29004e-31
1	Abca9	0	2.08533	0.956	0.103	0	0	1.65406	0.916	0.25	0	0	0
1	Abcc3	7.46901e-38	0.448609	0.607	0.267	2.30292e-33	0	0.818384	0.592	0.174	0	7.46901e-38	0
1	Abhd12	2.0808e-164	1.80173	0.997	0.629	6.41573e-160	0	1.00167	0.971	0.665	0	2.0808e-164	0
1	Abhd15	2.45253e-55	0.591057	0.553	0.202	7.5619e-51	0	0.736474	0.542	0.19	0	2.45253e-55	0
1	Abi3	2.53461e-79	0.873289	0.925	0.535	7.81497e-75	0	0.933879	0.74	0.267	0	2.53461e-79	0
1	Adap2	1.33377e-55	0.798877	0.963	0.656	4.11243e-51	0	1.32785	0.912	0.359	0	1.33377e-55	0
1	Adgre1	6.89712e-45	0.626276	0.875	0.488	2.12659e-40	0	1.09788	0.912	0.352	0	6.89712e-45	0
1	Adgrg1	0	2.17367	0.956	0.066	0	0	0.894692	0.879	0.468	0	0	0
1	Adora3	2.25784e-280	0.975091	0.664	0.074	6.96158e-276	0	0.679515	0.55	0.188	0	2.25784e-280	0
1	Adrb1	5.19046e-233	0.655615	0.386	0.027	1.60038e-228	0	0.80475	0.486	0.147	0	5.19046e-233	0
1	Adrb2	1.10017e-228	1.47478	0.695	0.107	3.39215e-224	0	1.45308	0.762	0.216	0	1.10017e-228	0
1	Agmo	0	1.21933	0.614	0.038	0	0	0.879143	0.534	0.185	0	0	0
1	Ang	2.38535e-107	0.794349	0.654	0.178	7.35475e-103	0	0.858782	0.668	0.231	0	2.38535e-107	0
1	Anxa3	2.13745e-191	1.53675	0.959	0.308	6.59039e-187	0	1.25583	0.925	0.338	0	2.13745e-191	0
1	Apbb1ip	1.64352e-124	1.35702	1	0.785	5.06747e-120	0	1.5584	0.99	0.517	0	1.64352e-124	0
1	Arhgap5	1.90963e-216	2.37306	0.993	0.362	5.88795e-212	0	0.787495	0.976	0.767	0	1.90963e-216	0
1	Asah1	7.12942e-19	0.393051	0.929	0.767	2.19821e-14	0	0.68461	0.945	0.664	0	7.12942e-19	0
1	Asph	2.1287e-198	1.40322	0.885	0.225	6.56343e-194	0	0.777123	0.819	0.445	0	2.1287e-198	0
1	Atf3	9.55805e-64	1.43527	0.919	0.74	2.94703e-59	0	1.52321	0.869	0.443	0	9.55805e-64	0
1	Atf4	2.39475e-76	0.955549	0.973	0.809	7.38374e-72	0	0.795483	0.91	0.727	0	2.39475e-76	0
1	Bin2	2.48616e-68	0.929878	0.919	0.64	7.66557e-64	0	0.843618	0.765	0.342	0	2.48616e-68	0
1	Blnk	2.28997e-303	1.52577	0.881	0.135	7.06065e-299	0	0.978748	0.726	0.244	0	2.28997e-303	0
1	Bmp2k	2.91207e-75	0.919683	0.983	0.72	8.9788e-71	0	1.04935	0.952	0.585	0	2.91207e-75	0
1	Btg2	2.1958e-112	1.37991	0.986	0.947	6.77032e-108	0	1.68685	0.976	0.694	0	2.1958e-112	0
1	C1qa	6.00249e-154	1.91774	1	0.456	1.85075e-149	0	1.0262	0.94	0.344	0	6.00249e-154	0
1	C1qb	5.47532e-129	1.78773	1	0.657	1.68821e-124	0	1.38088	0.999	0.53	0	5.47532e-129	0
1	C1qc	2.75514e-156	2.12858	1	0.603	8.49491e-152	0	1.43442	1	0.514	0	2.75514e-156	0
1	C3ar1	8.15105e-19	0.331815	0.875	0.551	2.51321e-14	0	1.01832	0.875	0.367	0	8.15105e-19	0
1	C5ar2	3.72586e-109	0.740024	0.59	0.142	1.14879e-104	0	0.827314	0.589	0.187	0	3.72586e-109	0
1	Calm2	2.77397e-77	0.898302	0.993	0.853	8.55298e-73	0	0.685426	0.974	0.813	0	2.77397e-77	0
1	Camk1	6.77911e-173	1.27708	0.864	0.254	2.0902e-168	0	0.74591	0.725	0.368	0	6.77911e-173	0
1	Ccnl1	6.02231e-46	0.704968	0.99	0.928	1.85686e-41	0	1.09839	0.967	0.724	0	6.02231e-46	0
1	Cd164	3.36138e-74	0.99405	0.959	0.748	1.03641e-69	0	1.19306	0.986	0.783	0	3.36138e-74	0
1	Cd180	4.0624e-67	1.01621	0.976	0.649	1.25256e-62	0	0.784872	0.9	0.388	0	4.0624e-67	0
1	Cd300c2	1.69523e-30	0.568236	0.837	0.549	5.22691e-26	0	0.847118	0.745	0.297	0	1.69523e-30	0
1	Cd33	1.0158e-173	1.70802	0.983	0.399	3.13203e-169	0	1.51436	0.984	0.379	0	1.0158e-173	0
1	Cd37	5.61905e-80	0.901088	0.929	0.514	1.73252e-75	0	0.951867	0.861	0.369	0	5.61905e-80	0
1	Cd68	2.78066e-31	0.454416	0.99	0.735	8.57361e-27	0	1.13426	0.968	0.438	0	2.78066e-31	0
1	Cd83	1.24994e-111	1.79503	0.976	0.707	3.85394e-107	0	1.48131	0.941	0.507	0	1.24994e-111	0
1	Cd84	5.01753e-17	0.415385	0.844	0.601	1.54706e-12	0	0.786777	0.788	0.36	0	5.01753e-17	0
1	Cebpa	3.98839e-70	1.1805	0.925	0.51	1.22974e-65	0	1.41045	0.865	0.369	0	3.98839e-70	0
1	Cfh	0	2.32179	0.983	0.143	0	0	1.61803	0.965	0.314	0	0	0
1	Clk1	9.16403e-45	0.694863	0.969	0.869	2.82555e-40	0	0.817116	0.963	0.82	0	9.16403e-45	0
1	Clta	4.72081e-57	0.693127	0.983	0.928	1.45557e-52	0	0.788998	0.955	0.728	0	4.72081e-57	0
1	Cltc	4.50467e-99	0.992501	1	0.916	1.38892e-94	0	0.605135	0.993	0.928	0	4.50467e-99	0
1	Cmtm6	4.51729e-119	1.2319	0.99	0.713	1.39281e-114	0	1.25115	0.953	0.514	0	4.51729e-119	0
1	Col27a1	0	1.68496	0.861	0.066	0	0	0.675787	0.738	0.333	0	0	0
1	Comt	8.49212e-137	1.3692	0.956	0.464	2.61838e-132	0	0.798464	0.935	0.685	0	8.49212e-137	0
1	Creg1	3.56212e-82	0.958705	0.942	0.614	1.09831e-77	0	0.864117	0.881	0.547	0	3.56212e-82	0
1	Crybb1	0	1.9522	0.854	0.049	0	0	1.18237	0.659	0.165	0	0	0
1	Csf1r	1.38796e-185	2.28801	1	0.741	4.2795e-181	0	1.96099	0.999	0.526	0	1.38796e-185	0
1	Csf3r	1.20575e-72	0.913451	0.956	0.582	3.71769e-68	0	1.14088	0.906	0.351	0	1.20575e-72	0
1	Csmd3	0	2.21369	0.797	0.076	0	0	1.12739	0.705	0.348	0	0	0
1	Csnk1e	5.64469e-75	0.940528	0.908	0.57	1.74043e-70	0	0.858182	0.888	0.588	0	5.64469e-75	0
1	Cst3	1.10425e-178	3.34038	1	0.955	3.40474e-174	0	1.83403	1	0.964	0	1.10425e-178	0
1	Ctsa	5.57021e-62	0.826559	0.983	0.789	1.71746e-57	0	0.810958	0.918	0.586	0	5.57021e-62	0
1	Ctsb	5.11405e-42	0.483473	1	0.951	1.57681e-37	0	0.65815	1	0.959	0	5.11405e-42	0
1	Ctsd	1.0521e-164	2.16389	0.997	0.664	3.24393e-160	0	1.23231	0.961	0.52	0	1.0521e-164	0
1	Ctsl	3.56096e-171	1.97006	0.997	0.499	1.09795e-166	0	1.11389	0.984	0.623	0	3.56096e-171	0
1	Ctss	1.24374e-26	0.549705	1	0.974	3.83481e-22	0	1.01533	1	0.694	0	1.24374e-26	0
1	Cttnbp2nl	5.41047e-92	1.1223	0.983	0.694	1.66821e-87	0	1.2927	0.975	0.594	0	5.41047e-92	0
1	Cx3cr1	5.28264e-214	3.52733	1	0.474	1.6288e-209	0	2.43918	1	0.455	0	5.28264e-214	0
1	Cyfip1	3.46849e-115	1.2486	0.986	0.771	1.06944e-110	0	1.18954	0.989	0.719	0	3.46849e-115	0
1	Cyth4	1.4665e-67	0.841876	0.986	0.819	4.52166e-63	0	1.27208	0.975	0.458	0	1.4665e-67	0
1	Daglb	4.9741e-127	1.03663	0.878	0.316	1.53366e-122	0	0.754414	0.754	0.387	0	4.9741e-127	0
1	Ddx3x	3.39984e-61	1.04642	0.983	0.886	1.04827e-56	0	0.968017	0.961	0.873	0	3.39984e-61	0
1	Ddx5	1.42004e-78	0.671777	1	0.999	4.37842e-74	0	0.778445	0.999	0.994	0	1.42004e-78	0
1	Dennd4a	1.57833e-42	0.845707	0.963	0.74	4.86648e-38	0	0.837827	0.915	0.623	0	1.57833e-42	0
1	Dhrs3	2.56009e-46	0.604202	0.8	0.422	7.89354e-42	0	0.674231	0.708	0.314	0	2.56009e-46	0
1	Dock8	1.05212e-35	0.618556	0.939	0.728	3.24399e-31	0	0.817752	0.892	0.451	0	1.05212e-35	0
1	Dusp6	3.65995e-82	1.37058	0.953	0.561	1.12847e-77	0	1.46304	0.966	0.56	0	3.65995e-82	0
1	E230029C05Rik	2.11996e-61	1.19797	0.847	0.473	6.53646e-57	0	1.12014	0.749	0.337	0	2.11996e-61	0
1	Ecscr	0	0.831512	0.573	0.024	0	0	0.638186	0.422	0.102	0	0	0
1	Efhd2	6.6865e-16	0.349411	0.993	0.916	2.06165e-11	0	0.886916	0.88	0.465	0	6.6865e-16	0
1	Egr1	9.57658e-226	4.0635	0.976	0.357	2.95275e-221	0	1.84099	0.95	0.674	0	9.57658e-226	0
1	Egr2	7.15432e-144	1.67201	0.908	0.3	2.20589e-139	0	1.07418	0.818	0.371	0	7.15432e-144	0
1	Eif4a1	1.70141e-17	0.380227	0.986	0.94	5.24596e-13	0	0.705503	0.988	0.922	0	1.70141e-17	0
1	Elmo1	1.0409e-97	1.31628	0.969	0.647	3.20942e-93	0	1.08369	0.943	0.611	0	1.0409e-97	0
1	Entpd1	4.12358e-65	0.913565	0.969	0.688	1.27142e-60	0	1.33668	0.936	0.414	0	4.12358e-65	0
1	Epb41l2	3.42519e-150	1.70916	0.993	0.763	1.05609e-145	0	1.393	0.983	0.675	0	3.42519e-150	0
1	F11r	5.63963e-83	1.05392	0.973	0.62	1.73887e-78	0	1.21733	0.902	0.36	0	5.63963e-83	0
1	Fam102b	2.3121e-174	1.68288	0.953	0.362	7.12891e-170	0	1.39627	0.892	0.444	0	2.3121e-174	0
1	Fam91a1	1.6685e-120	1.25195	0.908	0.454	5.1445e-116	0	0.930018	0.9	0.547	0	1.6685e-120	0
1	Fcgr3	1.72036e-79	1.04459	0.993	0.7	5.3044e-75	0	1.36352	0.993	0.424	0	1.72036e-79	0
1	Fcrls	0	3.05775	0.973	0.078	0	0	2.08954	0.955	0.284	0	0	0
1	Fermt3	1.89351e-23	0.476503	0.929	0.742	5.83827e-19	0	0.795119	0.776	0.368	0	1.89351e-23	0
1	Fgd2	8.26847e-124	1.07295	0.888	0.314	2.54942e-119	0	0.877356	0.721	0.251	0	8.26847e-124	0
1	Fli1	3.80529e-46	0.726357	0.922	0.639	1.17328e-41	0	1.02422	0.853	0.396	0	3.80529e-46	0
1	Fos	1.02188e-53	0.938467	0.986	0.894	3.15077e-49	0	0.949717	0.961	0.778	0	1.02188e-53	0
1	Frmd4a	2.51174e-98	1.15177	0.939	0.521	7.74444e-94	0	0.83322	0.862	0.472	0	2.51174e-98	0
1	Frmd4b	2.33806e-54	0.785822	0.847	0.491	7.20893e-50	0	0.85488	0.809	0.427	0	2.33806e-54	0
1	Fscn1	3.77268e-297	1.01876	0.963	0.163	1.16323e-292	0	1.16995	0.966	0.502	0	3.77268e-297	0
1	G530011O06Rik	2.2122e-129	1.1147	0.685	0.175	6.82088e-125	0	1.07666	0.709	0.271	0	2.2122e-129	0
1	Gcnt1	7.10162e-87	0.756547	0.746	0.264	2.18964e-82	0	0.758135	0.612	0.219	0	7.10162e-87	0
1	Gem	9.89011e-115	0.928016	0.62	0.14	3.04942e-110	0	1.01607	0.548	0.192	0	9.89011e-115	0
1	Git2	1.28901e-62	0.780333	0.946	0.64	3.97441e-58	0	0.847981	0.866	0.521	0	1.28901e-62	0
1	Gm10790	0	1.0655	0.675	0.029	0	0	1.08566	0.676	0.162	0	0	0
1	Gm2629	2.7842e-231	1.88346	0.959	0.252	8.58451e-227	0	1.5112	0.876	0.264	0	2.7842e-231	0
1	Gmip	1.19477e-15	0.371222	0.861	0.697	3.68384e-11	0	0.712083	0.755	0.382	0	1.19477e-15	0
1	Gns	7.93857e-37	0.550611	0.99	0.8	2.4477e-32	0	0.861451	0.966	0.649	0	7.93857e-37	0
1	Golm1	1.28683e-249	2.00827	0.976	0.268	3.96768e-245	0	1.42178	0.888	0.339	0	1.28683e-249	0
1	Gpr34	0	2.74304	0.976	0.069	0	0	2.24366	0.984	0.281	0	0	0
1	Grn	1.18319e-35	0.562613	1	0.859	3.64814e-31	0	0.584083	0.995	0.662	0	1.18319e-35	0
1	Gtf2h2	1.80884e-97	0.841596	0.79	0.289	5.57718e-93	0	0.746683	0.662	0.308	0	1.80884e-97	0
1	Havcr2	4.39552e-18	0.310948	0.807	0.546	1.35527e-13	0	0.928401	0.758	0.291	0	4.39552e-18	0
1	Herpud1	2.27256e-100	1.36833	0.942	0.494	7.00699e-96	0	0.910758	0.905	0.641	0	2.27256e-100	0
1	Hexb	4.47645e-181	3.32631	1	0.792	1.38022e-176	0	2.08764	1	0.68	0	4.47645e-181	0
1	Hhex	8.36429e-40	0.497601	0.661	0.297	2.57896e-35	0	0.928221	0.621	0.213	0	8.36429e-40	0
1	Hk2	2.51598e-33	0.563984	0.881	0.576	7.75751e-29	0	0.838193	0.861	0.393	0	2.51598e-33	0
1	Hpgd	0	2.09182	0.885	0.042	0	0	1.57084	0.869	0.234	0	0	0
1	Hpgds	0	2.53299	0.993	0.194	0	0	1.91218	0.99	0.348	0	0	0
1	Icam1	2.98449e-88	1.6901	0.959	0.67	9.20207e-84	0	1.67673	0.907	0.445	0	2.98449e-88	0
1	Ier2	2.09114e-136	1.78185	0.959	0.612	6.44761e-132	0	0.856153	0.688	0.299	0	2.09114e-136	0
1	Ier3	1.4776e-27	0.661491	0.695	0.414	4.55589e-23	0	0.867472	0.721	0.35	0	1.4776e-27	0
1	Ier5	1.95824e-126	1.51248	0.993	0.879	6.03783e-122	0	1.74481	0.98	0.621	0	1.95824e-126	0
1	Ighm	1.62131e-113	1.01809	0.888	0.339	4.99899e-109	0	1.10445	0.852	0.295	0	1.62131e-113	0
1	Ikzf1	3.729e-43	0.616587	0.969	0.774	1.14976e-38	0	0.973191	0.959	0.468	0	3.729e-43	0
1	Il1a	1.59745e-253	3.12041	0.942	0.226	4.92541e-249	0	1.41851	0.87	0.384	0	1.59745e-253	0
1	Il6ra	1.50745e-96	1.12391	0.99	0.667	4.64793e-92	0	1.59232	0.98	0.411	0	1.50745e-96	0
1	Inpp5d	8.90698e-82	0.985963	0.99	0.776	2.74629e-77	0	1.25473	0.953	0.437	0	8.90698e-82	0
1	Ints6l	1.31977e-176	1.35095	0.892	0.259	4.06925e-172	0	1.1728	0.893	0.435	0	1.31977e-176	0
1	Itga6	3.52525e-206	1.52013	0.919	0.228	1.08694e-201	0	0.895583	0.858	0.393	0	3.52525e-206	0
1	Itgam	1.48404e-123	1.45936	0.997	0.692	4.57573e-119	0	1.41338	0.989	0.418	0	1.48404e-123	0
1	Itgb5	1.2725e-174	1.77547	0.99	0.471	3.9235e-170	0	1.13332	0.893	0.396	0	1.2725e-174	0
1	Itm2b	2.49575e-98	0.900696	1	0.994	7.69513e-94	0	0.47308	0.999	0.994	0	2.49575e-98	0
1	Ivns1abp	3.18908e-131	1.4651	0.997	0.791	9.83289e-127	0	1.64008	0.996	0.69	0	3.18908e-131	0
1	Jun	4.1786e-144	2.47281	0.997	0.825	1.28839e-139	0	1.61819	0.983	0.785	0	4.1786e-144	0
1	Junb	3.78413e-128	1.45	0.993	0.963	1.16676e-123	0	1.50458	0.977	0.768	0	3.78413e-128	0
1	Jund	9.45388e-124	1.60383	0.993	0.966	2.91491e-119	0	1.30128	0.99	0.956	0	9.45388e-124	0
1	Kcnk6	1.00418e-144	1.19527	0.881	0.283	3.0962e-140	0	0.989967	0.805	0.293	0	1.00418e-144	0
1	Kctd12	1.22398e-186	3.34347	1	0.684	3.77391e-182	0	2.23503	1	0.599	0	1.22398e-186	0
1	Kdm6b	1.55244e-64	0.964041	0.953	0.712	4.78664e-60	0	1.03597	0.851	0.498	0	1.55244e-64	0
1	Kif21b	5.9518e-51	0.591901	0.803	0.415	1.83512e-46	0	0.743529	0.75	0.391	0	5.9518e-51	0
1	Lair1	2.24054e-66	0.893053	0.997	0.648	6.90826e-62	0	1.36337	0.984	0.419	0	2.24054e-66	0
1	Laptm5	1.35134e-121	0.972476	1	0.95	4.1666e-117	0	1.33904	0.998	0.541	0	1.35134e-121	0
1	Lgmn	2.70796e-127	1.44327	1	0.741	8.34945e-123	0	1.21666	0.998	0.611	0	2.70796e-127	0
1	Lmo2	3.96107e-98	1.04901	0.905	0.45	1.22132e-93	0	0.893198	0.822	0.352	0	3.96107e-98	0
1	Lpcat2	5.60693e-123	1.32503	0.997	0.659	1.72878e-118	0	1.28257	0.981	0.485	0	5.60693e-123	0
1	Lrba	2.03926e-96	0.933635	0.702	0.223	6.28765e-92	0	0.855876	0.629	0.272	0	2.03926e-96	0
1	Lrrc3	0	1.5436	0.864	0.052	0	0	1.118	0.821	0.272	0	0	0
1	Ltc4s	0	1.83844	0.875	0.06	0	0	1.23049	0.825	0.254	0	0	0
1	Ly86	2.17422e-132	1.55717	1	0.827	6.70376e-128	0	1.04294	0.999	0.568	0	2.17422e-132	0
1	Lyn	6.09126e-35	0.514548	0.997	0.801	1.87812e-30	0	0.928383	0.97	0.481	0	6.09126e-35	0
1	Maf	6.94625e-116	1.49369	0.98	0.554	2.14174e-111	0	1.65599	0.995	0.5	0	6.94625e-116	0
1	Mafb	2.17404e-49	1.0788	0.966	0.646	6.70322e-45	0	1.73075	0.956	0.422	0	2.17404e-49	0
1	Man1a	2.60687e-58	0.833883	0.82	0.434	8.03776e-54	0	0.920148	0.779	0.359	0	2.60687e-58	0
1	Man1c1	4.30793e-157	1.10911	0.892	0.277	1.32826e-152	0	1.1638	0.869	0.353	0	4.30793e-157	0
1	Man2b1	1.12276e-84	1.08412	0.963	0.713	3.46182e-80	0	0.967245	0.929	0.473	0	1.12276e-84	0
1	Marcks	1.92017e-158	1.87763	1	0.769	5.92045e-154	0	0.963137	0.999	0.798	0	1.92017e-158	0
1	Mef2a	2.07884e-67	0.9584	0.986	0.857	6.40969e-63	0	1.33907	0.985	0.718	0	2.07884e-67	0
1	Mef2c	5.82205e-224	2.14592	1	0.319	1.79511e-219	0	1.71958	0.986	0.402	0	5.82205e-224	0
1	Mertk	9.61679e-182	1.73144	0.983	0.354	2.96515e-177	0	1.25875	0.978	0.546	0	9.61679e-182	0
1	Mgat4a	1.11634e-39	0.670031	0.844	0.568	3.44202e-35	0	0.770692	0.714	0.362	0	1.11634e-39	0
1	Mknk1	2.23228e-40	0.636345	0.817	0.525	6.88278e-36	0	0.819459	0.805	0.416	0	2.23228e-40	0
1	Mlph	0	0.77325	0.495	0.018	0	0	0.929194	0.583	0.131	0	0	0
1	Mlxipl	0	1.19814	0.739	0.037	0	0	0.905211	0.658	0.185	0	0	0
1	Mtdh	8.93134e-100	1.05234	0.99	0.793	2.7538e-95	0	0.744883	0.969	0.827	0	8.93134e-100	0
1	Mylip	1.24601e-78	1.13595	0.939	0.612	3.84181e-74	0	1.31078	0.887	0.413	0	1.24601e-78	0
1	Nav3	0	2.30476	0.895	0.081	0	0	1.09899	0.802	0.39	0	0	0
1	Ncf1	4.00784e-48	0.729816	0.98	0.777	1.23574e-43	0	1.00169	0.904	0.411	0	4.00784e-48	0
1	Ncf2	5.09895e-16	0.343621	0.908	0.671	1.57216e-11	0	0.794447	0.799	0.361	0	5.09895e-16	0
1	Nckap1l	2.14393e-105	1.1118	0.973	0.678	6.61038e-101	0	1.08949	0.909	0.401	0	2.14393e-105	0
1	Nfam1	8.04263e-27	0.427196	0.871	0.555	2.47978e-22	0	0.834661	0.762	0.311	0	8.04263e-27	0
1	Nfkbia	1.30319e-66	1.62877	0.925	0.777	4.01811e-62	0	1.49438	0.914	0.639	0	1.30319e-66	0
1	Nfkbid	3.0332e-58	1.25687	0.908	0.679	9.35228e-54	0	1.11786	0.811	0.42	0	3.0332e-58	0
1	Nfkbiz	5.29249e-113	1.99902	0.969	0.68	1.63183e-108	0	1.48465	0.925	0.537	0	5.29249e-113	0
1	Nlrp3	2.50903e-68	1.35071	0.939	0.593	7.73609e-64	0	1.1953	0.902	0.41	0	2.50903e-68	0
1	Nrip1	1.69016e-46	0.747699	0.858	0.532	5.21128e-42	0	0.91233	0.826	0.485	0	1.69016e-46	0
1	Nrros	3.83423e-23	0.493542	0.969	0.758	1.18221e-18	0	0.822238	0.872	0.453	0	3.83423e-23	0
1	Nuak1	0	1.31418	0.803	0.106	0	0	1.01344	0.754	0.293	0	0	0
1	Numb	8.09487e-120	1.34217	0.858	0.351	2.49589e-115	0	1.1983	0.838	0.405	0	8.09487e-120	0
1	Ogfrl1	1.1008e-34	0.589048	0.939	0.701	3.3941e-30	0	0.895886	0.926	0.583	0	1.1008e-34	0
1	Olfml3	5.65163e-266	2.9956	0.997	0.272	1.74257e-261	0	1.84383	0.99	0.363	0	5.65163e-266	0
1	Ophn1	1.80443e-204	1.46941	0.868	0.204	5.56359e-200	0	0.903549	0.801	0.383	0	1.80443e-204	0
1	Osbpl11	1.76384e-99	1.00684	0.82	0.332	5.43844e-95	0	0.856737	0.714	0.348	0	1.76384e-99	0
1	Otulinl	1.82562e-51	0.683055	0.939	0.668	5.62895e-47	0	1.03768	0.847	0.366	0	1.82562e-51	0
1	P2ry12	4.72263e-263	3.90454	1	0.314	1.45613e-258	0	2.85194	1	0.415	0	4.72263e-263	0
1	P2ry13	9.9774e-240	2.47505	0.997	0.326	3.07633e-235	0	2.09993	0.993	0.353	0	9.9774e-240	0
1	Pag1	1.41673e-128	1.26263	0.929	0.429	4.36822e-124	0	1.02137	0.861	0.447	0	1.41673e-128	0
1	Pald1	8.75498e-180	0.926629	0.763	0.158	2.69942e-175	0	0.709506	0.583	0.21	0	8.75498e-180	0
1	Parvg	6.92194e-35	0.58798	0.851	0.567	2.13424e-30	0	0.917187	0.762	0.323	0	6.92194e-35	0
1	Pde3b	6.54073e-166	1.8157	0.983	0.493	2.0167e-161	0	1.58496	0.974	0.445	0	6.54073e-166	0
1	Pdgfb	7.84025e-188	1.81597	0.814	0.189	2.41739e-183	0	1.12028	0.667	0.236	0	7.84025e-188	0
1	Picalm	9.1328e-28	0.467849	1	0.952	2.81592e-23	0	0.970483	0.994	0.851	0	9.1328e-28	0
1	Pik3cg	1.87524e-62	0.830889	0.881	0.555	5.78194e-58	0	1.12129	0.861	0.327	0	1.87524e-62	0
1	Pld4	3.9078e-46	0.67848	0.973	0.714	1.20489e-41	0	0.812977	0.919	0.401	0	3.9078e-46	0
1	Plek	1.32872e-95	1.19974	0.997	0.86	4.09685e-91	0	1.23562	0.981	0.521	0	1.32872e-95	0
1	Plxdc2	8.8797e-206	2.52705	0.997	0.448	2.73788e-201	0	1.42557	0.989	0.696	0	8.8797e-206	0
1	Pmepa1	3.79232e-109	1.39265	0.959	0.515	1.16928e-104	0	1.20206	0.912	0.543	0	3.79232e-109	0
1	Pmp22	0	1.65965	0.881	0.075	0	0	0.812486	0.836	0.47	0	0	0
1	Pou2f2	2.59171e-115	1.44745	0.963	0.493	7.99103e-111	0	1.1912	0.893	0.388	0	2.59171e-115	0
1	Ppp1r15a	1.16804e-77	1.36221	0.908	0.662	3.60143e-73	0	1.13587	0.824	0.435	0	1.16804e-77	0
1	Ppp1r18	5.56367e-13	0.320499	0.919	0.79	1.71545e-08	0	0.715733	0.819	0.492	0	5.56367e-13	0
1	Pros1	1.15842e-255	1.42848	0.888	0.167	3.57176e-251	0	0.768494	0.81	0.406	0	1.15842e-255	0
1	Ptgs1	0	2.39621	0.983	0.135	0	0	1.71057	0.978	0.315	0	0	0
1	Rab3il1	3.41415e-216	1.27105	0.908	0.213	1.05268e-211	0	0.889854	0.75	0.275	0	3.41415e-216	0
1	Rapgef5	0	1.74346	0.864	0.069	0	0	1.10447	0.79	0.301	0	0	0
1	Rasgrp3	0	2.18639	0.98	0.138	0	0	1.42631	0.934	0.399	0	0	0
1	Rcbtb2	1.03446e-59	0.77604	0.783	0.396	3.18954e-55	0	0.960403	0.775	0.354	0	1.03446e-59	0
1	Rcsd1	6.92235e-29	0.455404	0.688	0.387	2.13437e-24	0	0.845086	0.747	0.293	0	6.92235e-29	0
1	Rgs10	2.47578e-171	1.99896	0.997	0.624	7.63357e-167	0	1.68219	0.994	0.451	0	2.47578e-171	0
1	Rgs2	3.57789e-19	0.491385	0.976	0.843	1.10317e-14	0	1.26975	0.938	0.506	0	3.57789e-19	0
1	Rhob	1.08314e-185	3.33715	1	0.636	3.33966e-181	0	1.93608	1	0.894	0	1.08314e-185	0
1	Rhoh	1.16482e-80	0.916303	0.895	0.448	3.59149e-76	0	0.832659	0.775	0.323	0	1.16482e-80	0
1	Rin2	2.82132e-99	1.09854	0.898	0.414	8.69898e-95	0	0.935988	0.852	0.482	0	2.82132e-99	0
1	Rnase4	6.66628e-184	1.93944	0.969	0.384	2.05541e-179	0	1.59459	0.941	0.345	0	6.66628e-184	0
1	Rock2	7.71306e-93	1.1351	0.959	0.629	2.37817e-88	0	0.805609	0.912	0.684	0	7.71306e-93	0
1	Rps6ka1	1.00265e-99	1.06205	0.925	0.53	3.09148e-95	0	0.8164	0.705	0.297	0	1.00265e-99	0
1	Rtn4rl1	0	1.16533	0.763	0.07	0	0	0.771319	0.546	0.141	0	0	0
1	Runx1	7.81167e-20	0.576033	0.881	0.698	2.40857e-15	0	0.863036	0.814	0.397	0	7.81167e-20	0
1	Sall1	0	2.19948	0.963	0.07	0	0	1.54064	0.967	0.505	0	0	0
1	Sall3	0	1.5077	0.715	0.041	0	0	0.977931	0.682	0.291	0	0	0
1	Sat1	1.16619e-30	0.597317	0.997	0.898	3.59572e-26	0	0.749204	0.987	0.802	0	1.16619e-30	0
1	Scamp2	4.15931e-109	1.12894	0.993	0.79	1.28244e-104	0	1.10452	0.971	0.628	0	4.15931e-109	0
1	Scoc	3.79912e-245	2.31686	0.983	0.287	1.17138e-240	0	1.44396	0.983	0.667	0	3.79912e-245	0
1	Selenop	3.4928e-177	2.91373	0.997	0.656	1.07694e-172	0	1.54132	0.999	0.767	0	3.4928e-177	0
1	Selplg	1.09054e-127	1.50851	0.99	0.842	3.36246e-123	0	1.43846	0.911	0.425	0	1.09054e-127	0
1	Serinc3	3.919e-164	1.52945	1	0.989	1.20835e-159	0	1.50317	1	0.935	0	3.919e-164	0
1	Sh2b3	6.99521e-25	0.470427	0.753	0.52	2.15683e-20	0	0.744889	0.691	0.31	0	6.99521e-25	0
1	Sh3pxd2a	2.74234e-126	0.696922	0.58	0.12	8.45546e-122	0	0.742225	0.579	0.209	0	2.74234e-126	0
1	Siglech	0	3.28167	1	0.095	0	0	2.30463	0.999	0.339	0	0	0
1	Sipa1	9.32763e-52	0.741689	0.898	0.62	2.87599e-47	0	0.866515	0.78	0.353	0	9.32763e-52	0
1	Sirpa	1.51218e-139	1.50361	0.993	0.677	4.6625e-135	0	1.43387	0.99	0.612	0	1.51218e-139	0
1	Skil	8.21826e-27	0.52422	0.986	0.905	2.53394e-22	0	1.17574	0.96	0.592	0	8.21826e-27	0
1	Slc16a6	4.17497e-148	1.67463	0.939	0.413	1.28727e-143	0	1.34785	0.903	0.377	0	4.17497e-148	0
1	Slc29a3	1.29684e-23	0.416354	0.963	0.71	3.99856e-19	0	0.741331	0.792	0.419	0	1.29684e-23	0
1	Slc2a5	0	1.69361	0.827	0.032	0	0	1.7522	0.882	0.186	0	0	0
1	Slc40a1	0	0.775368	0.512	0.022	0	0	0.64708	0.464	0.116	0	0	0
1	Slc7a8	5.35703e-74	0.906535	0.929	0.501	1.65173e-69	0	1.29071	0.925	0.373	0	5.35703e-74	0
1	Slco2b1	0	2.49036	0.983	0.081	0	0	1.6879	0.975	0.306	0	0	0
1	Smap2	7.72111e-147	1.5821	0.997	0.749	2.38065e-142	0	1.4131	0.988	0.666	0	7.72111e-147	0
1	Snn	2.08271e-230	1.06376	0.786	0.127	6.42161e-226	0	0.829215	0.761	0.378	0	2.08271e-230	0
1	Snx5	4.07814e-50	0.687731	0.986	0.841	1.25741e-45	0	1.12572	0.981	0.656	0	4.07814e-50	0
1	Sparc	3.48908e-297	4.02952	1	0.242	1.07579e-292	0	1.36326	0.998	0.71	0	3.48908e-297	0
1	Srgap2	1.1947e-160	1.80916	0.986	0.523	3.68362e-156	0	1.40213	0.969	0.543	0	1.1947e-160	0
1	Srsf5	2.04894e-58	0.722103	0.997	0.954	6.31749e-54	0	0.867399	0.991	0.928	0	2.04894e-58	0
1	Ssh2	6.04283e-87	1.12192	0.983	0.782	1.86319e-82	0	1.13993	0.978	0.662	0	6.04283e-87	0
1	St3gal6	1.32039e-268	1.76265	0.922	0.182	4.07116e-264	0	1.3488	0.918	0.371	0	1.32039e-268	0
1	Stab1	1.63295e-52	0.641423	0.766	0.376	5.03488e-48	0	0.756664	0.829	0.259	0	1.63295e-52	0
1	Tacc1	3.62895e-59	0.765583	0.959	0.72	1.11892e-54	0	0.742346	0.9	0.652	0	3.62895e-59	0
1	Tagap	6.61036e-39	0.793999	0.742	0.438	2.03817e-34	0	0.968238	0.658	0.284	0	6.61036e-39	0
1	Tanc2	0	2.71697	0.993	0.17	0	0	1.38039	0.954	0.581	0	0	0
1	Tcn2	7.51527e-84	0.91152	0.885	0.48	2.31718e-79	0	0.912884	0.892	0.471	0	7.51527e-84	0
1	Tfe3	1.78809e-49	0.664783	0.817	0.473	5.51323e-45	0	0.742704	0.721	0.374	0	1.78809e-49	0
1	Tgfbr1	1.37409e-119	1.56166	1	0.667	4.23673e-115	0	1.7806	0.97	0.511	0	1.37409e-119	0
1	Tgfbr2	2.04916e-99	1.14091	0.983	0.688	6.31817e-95	0	1.16801	0.98	0.501	0	2.04916e-99	0
1	Tlr7	5.0463e-76	0.867527	0.82	0.384	1.55593e-71	0	0.935733	0.783	0.316	0	5.0463e-76	0
1	Tm6sf1	2.38036e-13	0.315385	0.739	0.53	7.33935e-09	0	0.761695	0.651	0.264	0	2.38036e-13	0
1	Tmem119	0	2.50506	0.976	0.166	0	0	1.23321	0.765	0.23	0	0	0
1	Tnfrsf11a	2.23461e-42	0.589832	0.664	0.315	6.88998e-38	0	0.783848	0.713	0.285	0	2.23461e-42	0
1	Tpst2	5.69635e-23	0.437077	0.908	0.732	1.75636e-18	0	0.722317	0.882	0.591	0	5.69635e-23	0
1	Trem2	1.22548e-213	2.40236	0.997	0.384	3.77851e-209	0	1.62309	0.991	0.371	0	1.22548e-213	0
1	Txnip	5.50038e-31	0.690184	0.949	0.807	1.69593e-26	0	1.11595	0.927	0.551	0	5.50038e-31	0
1	Tyrobp	1.35426e-15	0.354198	1	0.886	4.17559e-11	0	1.11353	0.998	0.524	0	1.35426e-15	0
1	Ubash3b	2.00863e-55	0.805955	0.881	0.54	6.1932e-51	0	0.856406	0.752	0.381	0	2.00863e-55	0
1	Ubc	4.3776e-142	1.44004	1	0.997	1.34975e-137	0	1.22903	0.997	0.985	0	4.3776e-142	0
1	Ulk2	2.44962e-134	1.17518	0.858	0.294	7.55292e-130	0	0.790799	0.823	0.53	0	2.44962e-134	0
1	Unc93b1	8.40695e-49	0.649674	1	0.822	2.59212e-44	0	1.172	0.974	0.463	0	8.40695e-49	0
1	Upk1b	0	0.537544	0.298	0.006	0	0	0.744431	0.379	0.06	0	0	0
1	Vsir	6.86056e-177	2.01151	0.997	0.618	2.11532e-172	0	1.90923	0.995	0.446	0	6.86056e-177	0
1	Wasf2	1.38896e-78	0.877814	0.983	0.837	4.28258e-74	0	1.04967	0.953	0.639	0	1.38896e-78	0
1	Whrn	0	1.2292	0.773	0.052	0	0	0.815625	0.539	0.176	0	0	0
1	Wnk1	5.75718e-75	0.859673	0.99	0.877	1.77511e-70	0	0.664602	0.971	0.816	0	5.75718e-75	0
1	Wsb1	4.40157e-97	1.20932	0.953	0.672	1.35714e-92	0	1.11888	0.941	0.619	0	4.40157e-97	0
1	Zfhx3	1.07241e-212	2.24761	0.983	0.365	3.30657e-208	0	1.61805	0.968	0.454	0	1.07241e-212	0
1	Zfp36	5.53643e-109	1.46262	0.993	0.934	1.70705e-104	0	1.7474	0.997	0.75	0	5.53643e-109	0
1	Zfp36l1	6.32398e-58	1.19185	1	0.876	1.94987e-53	0	1.25348	0.991	0.784	0	6.32398e-58	0
1	Atp8a2	0	1.14744	0.671	0.059	0	1.45797e-283	0.669113	0.488	0.169	4.49536e-279	1.45797e-283	0
1	Tal1	0	0.771126	0.512	0.036	0	1.01126e-274	0.646662	0.443	0.136	3.11801e-270	1.01126e-274	0
1	P3h2	0	0.847033	0.522	0.025	0	2.07109e-267	0.620277	0.42	0.123	6.38579e-263	2.07109e-267	0
1	Gas6	0	1.2313	0.797	0.071	0	4.34293e-229	0.621055	0.673	0.351	1.33905e-224	4.34293e-229	0
1	Cd34	0	1.32804	0.698	0.056	0	7.05913e-224	0.64513	0.535	0.216	2.17654e-219	7.05913e-224	0
1	Tln2	0	1.0702	0.698	0.063	0	2.72682e-223	0.613449	0.597	0.294	8.4076e-219	2.72682e-223	0
1	Liph	0	0.567191	0.39	0.016	0	1.33041e-210	0.485759	0.335	0.095	4.10205e-206	1.33041e-210	0
1	Lag3	0	1.68916	0.915	0.103	0	7.77369e-194	0.485417	0.431	0.165	2.39686e-189	7.77369e-194	0
1	Ppp1r9a	0	1.37073	0.756	0.083	0	5.63805e-187	0.622284	0.703	0.437	1.73838e-182	5.63805e-187	0
1	Ctsf	0	1.07318	0.702	0.059	0	4.96532e-120	0.414198	0.572	0.356	1.53096e-115	4.96532e-120	0
1	Eef2k	7.2721e-245	0.93241	0.681	0.092	2.24221e-240	4.14383e-306	0.699328	0.643	0.295	1.27767e-301	7.2721e-245	8.28766e-306
1	Zfp710	5.88619e-77	0.963844	0.898	0.501	1.81489e-72	4.39202e-306	0.756098	0.667	0.32	1.35419e-301	5.88619e-77	8.78404e-306
1	Sft2d1	6.34782e-82	0.901233	0.861	0.497	1.95722e-77	1.28353e-305	0.682698	0.751	0.42	3.9575e-301	6.34782e-82	2.56706e-305
1	Sft2d2	1.58543e-39	0.538222	0.759	0.442	4.88836e-35	2.89311e-304	0.687757	0.741	0.403	8.92032e-300	1.58543e-39	5.78622e-304
1	Edem1	1.18272e-25	0.515728	0.922	0.77	3.64668e-21	2.19127e-302	0.776097	0.822	0.478	6.75634e-298	1.18272e-25	4.38254e-302
1	Bin1	4.93379e-177	1.80903	0.99	0.438	1.52124e-172	2.73898e-302	0.698455	0.818	0.464	8.4451e-298	4.93379e-177	5.47796e-302
1	Eif5	1.37374e-30	0.510928	0.966	0.913	4.23565e-26	1.90693e-300	0.709653	0.954	0.847	5.87963e-296	1.37374e-30	3.81386e-300
1	Rhobtb1	8.32383e-292	0.657588	0.475	0.033	2.56649e-287	1.88042e-233	0.494668	0.347	0.089	5.79789e-229	1.88042e-233	1.66477e-291
1	Socs3	2.62425e-33	0.816754	0.949	0.766	8.09134e-29	1.00276e-290	0.899535	0.887	0.59	3.0918e-286	2.62425e-33	2.00551e-290
1	Fmnl3	1.52492e-67	0.682034	0.783	0.358	4.70179e-63	1.63681e-286	0.656125	0.588	0.259	5.04677e-282	1.52492e-67	3.27361e-286
1	Tob2	1.04437e-39	0.900499	0.932	0.77	3.22011e-35	1.86433e-286	0.916673	0.898	0.725	5.7483e-282	1.04437e-39	3.72867e-286
1	Ehd4	5.95083e-28	0.490998	0.908	0.642	1.83482e-23	4.92653e-285	0.631258	0.826	0.433	1.519e-280	5.95083e-28	9.85306e-285
1	Gm5086	2.47133e-117	0.695751	0.508	0.097	7.61986e-113	1.01779e-284	0.702384	0.439	0.127	3.13815e-280	2.47133e-117	2.03558e-284
1	Jmjd1c	1.08433e-78	1.22927	0.939	0.61	3.34331e-74	1.18592e-284	0.783222	0.88	0.625	3.65654e-280	1.08433e-78	2.37184e-284
1	Slc37a2	7.84107e-45	0.574129	0.654	0.318	2.41764e-40	3.48773e-284	0.607538	0.499	0.175	1.07537e-279	7.84107e-45	6.97546e-284
1	Tspan14	4.78766e-66	0.803697	0.929	0.64	1.47618e-61	6.71213e-283	0.642894	0.915	0.649	2.06955e-278	4.78766e-66	1.34243e-282
1	Ppfia4	3.81288e-98	1.02154	0.875	0.396	1.17563e-93	3.59588e-281	0.595457	0.686	0.29	1.10872e-276	3.81288e-98	7.19175e-281
1	Lcp2	2.77624e-22	0.401471	0.898	0.667	8.55997e-18	1.1042e-280	0.597298	0.776	0.374	3.40459e-276	2.77624e-22	2.20841e-280
1	Sting1	4.66413e-18	0.419107	0.885	0.713	1.43809e-13	3.70664e-280	0.668241	0.772	0.381	1.14287e-275	4.66413e-18	7.41328e-280
1	Dtx4	1.38867e-107	0.897977	0.766	0.247	4.28168e-103	4.59735e-280	0.672113	0.696	0.356	1.4175e-275	1.38867e-107	9.1947e-280
1	Nek7	3.4294e-49	0.702117	0.936	0.71	1.05739e-44	2.01434e-279	0.663114	0.894	0.637	6.2108e-275	3.4294e-49	4.02867e-279
1	Sult1a1	1.55844e-263	0.554283	0.42	0.028	4.80514e-259	6.33214e-279	0.596425	0.494	0.167	1.95239e-274	1.55844e-263	1.26643e-278
1	Tnfaip3	7.1356e-08	0.320749	0.861	0.765	0.00220012	3.98154e-278	0.860052	0.812	0.45	1.22763e-273	7.1356e-08	7.96308e-278
1	Ywhah	1.21204e-69	0.839281	0.986	0.886	3.73707e-65	1.25409e-275	0.650805	0.966	0.789	3.86674e-271	1.21204e-69	2.50818e-275
1	Tnf	1.5623e-95	1.8216	0.793	0.32	4.81705e-91	1.48382e-275	0.788544	0.701	0.323	4.57508e-271	1.5623e-95	2.96765e-275
1	Evi2a	1.11763e-56	0.853074	0.922	0.652	3.44597e-52	3.67392e-275	0.703928	0.847	0.487	1.13278e-270	1.11763e-56	7.34784e-275
1	Arl4c	3.12289e-11	0.336708	0.939	0.817	9.62882e-07	3.999e-275	0.810224	0.866	0.558	1.23301e-270	3.12289e-11	7.998e-275
1	Ptprj	2.53004e-52	0.834141	0.932	0.633	7.80088e-48	7.87203e-275	0.695994	0.871	0.551	2.42718e-270	2.53004e-52	1.57441e-274
1	Tpp1	1.70056e-61	0.786151	0.908	0.633	5.24335e-57	8.32533e-275	0.631834	0.912	0.681	2.56695e-270	1.70056e-61	1.66507e-274
1	Pip4k2a	1.08971e-61	0.828244	0.969	0.742	3.35992e-57	1.85634e-274	0.518465	0.943	0.702	5.72364e-270	1.08971e-61	3.71267e-274
1	Gna15	7.57181e-69	0.701804	0.658	0.254	2.33462e-64	2.22841e-273	0.632154	0.522	0.201	6.87086e-269	7.57181e-69	4.45682e-273
1	Zfand5	7.21408e-48	0.936798	0.973	0.82	2.22432e-43	1.36376e-272	0.832121	0.929	0.795	4.20487e-268	7.21408e-48	2.72752e-272
1	Plxna4	1.94103e-272	0.750468	0.454	0.032	5.98479e-268	1.17164e-87	0.330757	0.337	0.169	3.61253e-83	1.17164e-87	3.88207e-272
1	C5ar1	6.96116e-20	0.689685	0.692	0.454	2.14633e-15	2.46047e-268	0.719472	0.68	0.311	7.58636e-264	6.96116e-20	4.92093e-268
1	Clip1	9.44089e-75	0.970138	0.864	0.484	2.91091e-70	1.70056e-267	0.765827	0.777	0.483	5.24333e-263	9.44089e-75	3.40112e-267
1	Rp2	1.53617e-17	0.376827	0.844	0.646	4.73647e-13	6.342e-265	0.720315	0.764	0.445	1.95543e-260	1.53617e-17	1.2684e-264
1	Btk	3.8225e-32	0.511075	0.678	0.393	1.17859e-27	1.02137e-262	0.599154	0.603	0.267	3.1492e-258	3.8225e-32	2.04274e-262
1	Hps3	1.00719e-22	0.419502	0.685	0.42	3.10546e-18	1.54025e-262	0.639498	0.681	0.349	4.74904e-258	1.00719e-22	3.08049e-262
1	Dusp7	8.68737e-130	0.97556	0.715	0.189	2.67858e-125	8.95123e-262	0.744733	0.684	0.375	2.75993e-257	8.68737e-130	1.79025e-261
1	Commd8	3.2016e-36	0.577832	0.759	0.478	9.87148e-32	4.28564e-261	0.671337	0.708	0.417	1.32139e-256	3.2016e-36	8.57128e-261
1	Heatr5a	1.01872e-77	0.862704	0.814	0.362	3.14102e-73	4.60617e-260	0.693993	0.733	0.411	1.42022e-255	1.01872e-77	9.21233e-260
1	Tgfb1	2.38328e-30	0.575001	0.746	0.459	7.34838e-26	5.35174e-260	0.693247	0.514	0.201	1.6501e-255	2.38328e-30	1.07035e-259
1	Zeb2os	1.49303e-29	0.445533	0.685	0.391	4.60345e-25	7.6784e-260	0.634847	0.59	0.269	2.36748e-255	1.49303e-29	1.53568e-259
1	Sncaip	3.96817e-259	0.537861	0.319	0.015	1.22351e-254	7.30139e-114	0.345071	0.285	0.108	2.25124e-109	7.30139e-114	7.93635e-259
1	Soga1	1.3842e-238	0.977138	0.705	0.104	4.2679e-234	1.12727e-256	0.643223	0.577	0.263	3.47572e-252	1.3842e-238	2.25454e-256
1	Basp1	8.38389e-123	1.42287	0.997	0.563	2.58501e-118	6.63873e-255	0.474726	0.989	0.626	2.04692e-250	8.38389e-123	1.32775e-254
1	Alox5	1.18038e-209	0.407517	0.342	0.023	3.63948e-205	1.15457e-254	0.537028	0.413	0.12	3.55989e-250	1.18038e-209	2.30914e-254
1	Tnfaip8l2	1.84952e-19	0.395187	0.647	0.438	5.70263e-15	9.0926e-254	0.588147	0.575	0.251	2.80352e-249	1.84952e-19	1.81852e-253
1	Col15a1	2.35542e-86	0.554096	0.464	0.106	7.26248e-82	9.3812e-253	0.587814	0.378	0.103	2.8925e-248	2.35542e-86	1.87624e-252
1	1700017B05Rik	1.21937e-60	0.793336	0.746	0.361	3.75967e-56	3.97043e-252	0.652954	0.602	0.287	1.2242e-247	1.21937e-60	7.94087e-252
1	Zfp652	8.30741e-41	0.722248	0.79	0.518	2.56142e-36	7.84586e-251	0.687138	0.756	0.48	2.41912e-246	8.30741e-41	1.56917e-250
1	Xlr	1.63723e-250	0.571547	0.454	0.036	5.04807e-246	2.35892e-218	0.500465	0.406	0.141	7.27326e-214	2.35892e-218	3.27446e-250
1	A630001G21Rik	3.41679e-15	0.314165	0.61	0.392	1.0535e-10	4.69277e-249	0.594088	0.553	0.238	1.44692e-244	3.41679e-15	9.38554e-249
1	Ppp1r10	1.48256e-82	1.03857	0.749	0.313	4.57117e-78	4.73937e-247	0.844521	0.665	0.389	1.46129e-242	1.48256e-82	9.47873e-247
1	Mtus1	4.44568e-64	0.826564	0.885	0.472	1.37074e-59	9.25074e-247	0.636934	0.811	0.485	2.85228e-242	4.44568e-64	1.85015e-246
1	Fosb	2.69555e-58	1.6629	0.864	0.555	8.31119e-54	1.28958e-244	0.967198	0.866	0.607	3.97616e-240	2.69555e-58	2.57916e-244
1	Slc36a1	1.17213e-31	0.505392	0.685	0.387	3.61402e-27	2.31392e-242	0.589635	0.635	0.319	7.1345e-238	1.17213e-31	4.62783e-242
1	Gpr84	9.68362e-160	1.2796	0.62	0.118	2.98575e-155	6.52361e-241	0.833159	0.515	0.199	2.01143e-236	9.68362e-160	1.30472e-240
1	Il17ra	9.94408e-25	0.430072	0.742	0.458	3.06606e-20	8.72846e-241	0.615174	0.647	0.323	2.69125e-236	9.94408e-25	1.74569e-240
1	Snta1	1.42489e-237	0.862921	0.586	0.068	4.39337e-233	7.43797e-129	0.420675	0.483	0.253	2.29335e-124	7.43797e-129	2.84978e-237
1	Ralb	1.48612e-13	0.302166	0.776	0.58	4.58217e-09	7.23913e-237	0.589385	0.719	0.413	2.23204e-232	1.48612e-13	1.44783e-236
1	Dnase2a	1.5604e-26	0.450642	0.654	0.399	4.81118e-22	2.04986e-236	0.618556	0.628	0.321	6.32034e-232	1.5604e-26	4.09973e-236
1	Ifitm10	1.77543e-156	0.697263	0.502	0.07	5.47417e-152	1.1369e-235	0.668556	0.441	0.154	3.50541e-231	1.77543e-156	2.2738e-235
1	Slc46a1	1.05358e-234	0.515528	0.407	0.031	3.24851e-230	8.08944e-108	0.362985	0.33	0.151	2.49422e-103	8.08944e-108	2.10716e-234
1	I830077J02Rik	2.52202e-37	0.482969	0.607	0.284	7.77615e-33	1.97866e-234	0.532402	0.476	0.183	6.10079e-230	2.52202e-37	3.95731e-234
1	Plcl2	3.57157e-31	0.57026	0.722	0.428	1.10122e-26	1.08387e-233	0.638269	0.56	0.26	3.3419e-229	3.57157e-31	2.16774e-233
1	Slc9a9	1.18701e-126	1.14316	0.82	0.249	3.65992e-122	9.18976e-233	0.717132	0.675	0.375	2.83348e-228	1.18701e-126	1.83795e-232
1	Pfkfb3	2.83935e-24	0.781615	0.78	0.606	8.75458e-20	1.2428e-230	0.790757	0.737	0.411	3.83191e-226	2.83935e-24	2.48559e-230
1	Arap3	2.4642e-173	0.669408	0.498	0.065	7.59787e-169	1.06864e-229	0.461701	0.338	0.085	3.29493e-225	2.4642e-173	2.13728e-229
1	Tbxas1	3.63956e-33	0.555625	0.719	0.394	1.12219e-28	2.12735e-228	0.616836	0.549	0.245	6.55925e-224	3.63956e-33	4.2547e-228
1	Hexa	2.04069e-93	1.03091	0.956	0.586	6.29205e-89	3.20141e-228	0.585	0.601	0.298	9.87092e-224	2.04069e-93	6.40283e-228
1	Cfap74	9.47247e-228	0.517978	0.39	0.028	2.92065e-223	1.0555e-163	0.449781	0.315	0.102	3.25442e-159	1.0555e-163	1.89449e-227
1	Slc25a45	2.65323e-33	0.511404	0.675	0.379	8.18071e-29	3.41559e-227	0.593037	0.599	0.298	1.05313e-222	2.65323e-33	6.83119e-227
1	0610040J01Rik	1.50308e-190	0.858931	0.641	0.104	4.63443e-186	2.23933e-226	0.589762	0.563	0.261	6.90453e-222	1.50308e-190	4.47866e-226
1	Tnfrsf13b	7.04011e-43	0.488016	0.59	0.254	2.17068e-38	2.2693e-226	0.549071	0.476	0.19	6.99692e-222	7.04011e-43	4.53859e-226
1	Mrc2	1.29508e-190	0.516327	0.336	0.025	3.99313e-186	5.73787e-225	0.494231	0.33	0.081	1.76916e-220	1.29508e-190	1.14757e-224
1	Smad7	1.58504e-75	1.16006	0.888	0.529	4.88717e-71	1.62837e-223	0.818757	0.753	0.485	5.02074e-219	1.58504e-75	3.25673e-223
1	Gm38843	2.97696e-99	0.445728	0.39	0.066	9.17887e-95	6.18176e-222	0.525456	0.383	0.121	1.90602e-217	2.97696e-99	1.23635e-221
1	Dapp1	2.90598e-07	0.309173	0.624	0.493	0.00896002	8.03504e-222	0.594506	0.535	0.234	2.47744e-217	2.90598e-07	1.60701e-221
1	Pla2g15	2.52297e-117	0.974627	0.831	0.293	7.77907e-113	1.89944e-221	0.579042	0.583	0.279	5.85653e-217	2.52297e-117	3.79887e-221
1	Plekho1	1.38857e-16	0.363429	0.8	0.598	4.28138e-12	3.75962e-221	0.565376	0.564	0.27	1.1592e-216	1.38857e-16	7.51923e-221
1	Tmem64	4.56054e-76	0.519281	0.603	0.181	1.40615e-71	1.5969e-220	0.541918	0.62	0.317	4.92372e-216	4.56054e-76	3.1938e-220
1	Ccl3	1.48637e-76	2.50968	0.756	0.373	4.58291e-72	2.09757e-220	1.20363	0.705	0.405	6.46744e-216	1.48637e-76	4.19514e-220
1	Gpr183	3.1812e-25	0.379217	0.725	0.407	9.80859e-21	4.1881e-220	0.596504	0.583	0.26	1.29132e-215	3.1812e-25	8.3762e-220
1	Slc7a7	4.3166e-41	0.505209	0.6	0.277	1.33094e-36	5.05632e-220	0.558711	0.512	0.222	1.55902e-215	4.3166e-41	1.01126e-219
1	Cd2ap	3.97598e-15	0.330737	0.875	0.695	1.22591e-10	1.0912e-218	0.606456	0.835	0.564	3.3645e-214	3.97598e-15	2.18241e-218
1	Dip2b	1.36001e-64	0.784043	0.844	0.444	4.19333e-60	1.62303e-218	0.600147	0.75	0.47	5.00428e-214	1.36001e-64	3.24606e-218
1	P2ry6	4.13304e-31	0.437648	0.736	0.422	1.27434e-26	2.79173e-215	0.556481	0.549	0.254	8.60774e-211	4.13304e-31	5.58346e-215
1	Ppcdc	2.17676e-48	0.526158	0.576	0.235	6.71161e-44	3.03647e-215	0.557821	0.488	0.209	9.36233e-211	2.17676e-48	6.07293e-215
1	Mafg	2.39781e-37	0.618493	0.82	0.534	7.39316e-33	3.96551e-214	0.613977	0.711	0.447	1.22269e-209	2.39781e-37	7.93102e-214
1	Dleu2	1.98614e-21	0.772171	0.766	0.591	6.12387e-17	1.79834e-213	0.856485	0.713	0.433	5.54483e-209	1.98614e-21	3.59669e-213
1	Prpsap2	2.62689e-74	0.71076	0.685	0.258	8.09948e-70	2.55711e-213	0.605671	0.687	0.423	7.88433e-209	2.62689e-74	5.11422e-213
1	Spata13	1.6623e-12	0.314376	0.837	0.661	5.12536e-08	3.37603e-213	0.576998	0.761	0.431	1.04093e-208	1.6623e-12	6.75206e-213
1	Rreb1	3.00005e-29	0.567514	0.753	0.468	9.25005e-25	3.65226e-212	0.631779	0.643	0.346	1.1261e-207	3.00005e-29	7.30451e-212
1	Myo1b	1.33528e-211	0.434572	0.332	0.022	4.11708e-207	2.3201e-130	0.315487	0.234	0.067	7.15356e-126	2.3201e-130	2.67057e-211
1	Bank1	6.31778e-102	0.462992	0.298	0.037	1.94796e-97	1.56071e-210	0.507726	0.334	0.088	4.81213e-206	6.31778e-102	3.12142e-210
1	Rnf130	4.60466e-22	0.43966	0.932	0.779	1.41976e-17	2.24965e-210	0.536338	0.924	0.733	6.93636e-206	4.60466e-22	4.49931e-210
1	Usp2	1.68145e-103	1.0913	0.81	0.319	5.18442e-99	3.68072e-210	0.631686	0.774	0.515	1.13488e-205	1.68145e-103	7.36145e-210
1	Senp2	2.54966e-37	0.648051	0.82	0.539	7.86136e-33	1.3085e-209	0.618238	0.699	0.433	4.0345e-205	2.54966e-37	2.617e-209
1	Rap1gds1	9.98591e-58	0.835477	0.922	0.654	3.07895e-53	2.3517e-209	0.605172	0.866	0.643	7.251e-205	9.98591e-58	4.7034e-209
1	Cebpg	9.74538e-14	0.353366	0.814	0.635	3.00479e-09	1.19673e-208	0.608177	0.773	0.531	3.68986e-204	9.74538e-14	2.39345e-208
1	Npl	3.97619e-202	0.559701	0.451	0.045	1.22598e-197	1.22689e-208	0.522196	0.497	0.213	3.78286e-204	3.97619e-202	2.45377e-208
1	Sipa1l2	1.14579e-108	0.966334	0.756	0.255	3.53281e-104	1.78713e-207	0.568329	0.661	0.37	5.51026e-203	1.14579e-108	3.57426e-207
1	Cass4	3.30428e-42	0.581544	0.444	0.153	1.01881e-37	2.04436e-207	0.607061	0.38	0.122	6.30338e-203	3.30428e-42	4.08872e-207
1	Sun2	6.64983e-33	0.557469	0.912	0.721	2.05034e-28	2.64784e-207	0.560332	0.866	0.662	8.16408e-203	6.64983e-33	5.29567e-207
1	4933406I18Rik	6.27971e-121	1.08079	0.546	0.111	1.93622e-116	5.99859e-207	0.848452	0.428	0.162	1.84954e-202	6.27971e-121	1.19972e-206
1	Abcd2	7.3052e-131	0.811817	0.563	0.109	2.25241e-126	3.19376e-206	0.569155	0.544	0.248	9.84732e-202	7.3052e-131	6.38752e-206
1	Ntpcr	5.99346e-83	0.894876	0.831	0.373	1.84796e-78	6.62555e-206	0.520567	0.619	0.306	2.04286e-201	5.99346e-83	1.32511e-205
1	Fchsd2	1.31171e-75	0.938086	0.803	0.342	4.04439e-71	1.23452e-205	0.631566	0.795	0.512	3.80641e-201	1.31171e-75	2.46905e-205
1	Hnrnpa2b1	8.06042e-35	0.449531	1	0.994	2.48527e-30	1.56544e-205	0.416209	0.998	0.991	4.82671e-201	8.06042e-35	3.13087e-205
1	Ccni	5.83037e-58	0.793459	0.956	0.847	1.79768e-53	5.05764e-205	0.534967	0.932	0.793	1.55942e-200	5.83037e-58	1.01153e-204
1	Cryl1	5.24489e-86	0.641155	0.529	0.14	1.61716e-81	9.09225e-205	0.511761	0.479	0.206	2.80341e-200	5.24489e-86	1.81845e-204
1	Hfe	6.67125e-46	0.442384	0.569	0.226	2.05695e-41	2.8823e-203	0.499948	0.486	0.209	8.887e-199	6.67125e-46	5.7646e-203
1	Fez2	1.86284e-85	0.771728	0.719	0.268	5.74369e-81	5.795e-203	0.54872	0.589	0.315	1.78677e-198	1.86284e-85	1.159e-202
1	Syngr1	6.85073e-198	0.913291	0.746	0.13	2.11228e-193	1.48737e-202	0.517885	0.602	0.304	4.58602e-198	6.85073e-198	2.97475e-202
1	Naalad2	6.92407e-177	0.397492	0.251	0.014	2.1349e-172	7.05074e-202	0.506609	0.316	0.085	2.17395e-197	6.92407e-177	1.41015e-201
1	Nfya	4.38828e-20	0.480031	0.678	0.461	1.35304e-15	5.46154e-201	0.63658	0.658	0.391	1.68396e-196	4.38828e-20	1.09231e-200
1	Gm40841	1.30248e-121	0.357047	0.241	0.02	4.01595e-117	3.51383e-200	0.496748	0.302	0.075	1.08342e-195	1.30248e-121	7.02766e-200
1	Neurl1a	4.99377e-198	0.465951	0.332	0.024	1.53973e-193	8.34171e-109	0.304028	0.271	0.107	2.572e-104	8.34171e-109	9.98755e-198
1	Tbc1d9	1.59824e-12	0.304753	0.817	0.614	4.92787e-08	6.70189e-197	0.550013	0.709	0.43	2.06639e-192	1.59824e-12	1.34038e-196
1	Zswim6	3.37055e-33	0.669582	0.831	0.562	1.03924e-28	9.50971e-196	0.638575	0.748	0.499	2.93213e-191	3.37055e-33	1.90194e-195
1	Plcb2	8.86309e-24	0.400028	0.522	0.275	2.73276e-19	1.00804e-195	0.503026	0.465	0.198	3.1081e-191	8.86309e-24	2.01609e-195
1	Ski	3.3704e-26	0.472207	0.963	0.789	1.03919e-21	1.29594e-195	0.567856	0.893	0.742	3.99578e-191	3.3704e-26	2.59188e-195
1	Il6st	2.79124e-77	0.851217	0.834	0.395	8.60623e-73	6.7658e-195	0.582738	0.744	0.494	2.0861e-190	2.79124e-77	1.35316e-194
1	Wdr26	1.18978e-14	0.336083	0.942	0.879	3.66845e-10	1.04871e-194	0.548063	0.907	0.755	3.23347e-190	1.18978e-14	2.09741e-194
1	Irf2bpl	8.95432e-73	1.25298	0.895	0.593	2.76089e-68	1.60529e-193	0.751961	0.894	0.714	4.9496e-189	8.95432e-73	3.21059e-193
1	Tubgcp5	2.66037e-46	0.579525	0.566	0.235	8.20271e-42	5.27319e-193	0.604027	0.565	0.296	1.62588e-188	2.66037e-46	1.05464e-192
1	Zmiz1	1.24384e-52	0.714035	0.953	0.728	3.83513e-48	2.91731e-192	0.492699	0.919	0.731	8.99493e-188	1.24384e-52	5.83462e-192
1	Casp4	9.25304e-10	0.43382	0.783	0.666	2.85299e-05	6.31691e-191	0.75814	0.653	0.365	1.94769e-186	9.25304e-10	1.26338e-190
1	Marcksl1	4.23152e-31	0.6508	0.878	0.626	1.3047e-26	1.74137e-190	0.831642	0.858	0.717	5.36915e-186	4.23152e-31	3.48273e-190
1	Tbc1d16	2.62883e-190	0.823803	0.59	0.087	8.10547e-186	2.80702e-148	0.446118	0.512	0.273	8.65489e-144	2.80702e-148	5.25766e-190
1	Egr3	3.02585e-187	1.94841	0.566	0.08	9.32959e-183	1.52705e-110	0.935298	0.357	0.167	4.70835e-106	1.52705e-110	6.05169e-187
1	Dgkd	8.70563e-48	0.610213	0.725	0.375	2.68421e-43	5.89016e-187	0.55101	0.593	0.336	1.81611e-182	8.70563e-48	1.17803e-186
1	Stard9	2.77469e-45	0.63508	0.705	0.344	8.5552e-41	8.88371e-186	0.570398	0.607	0.337	2.73911e-181	2.77469e-45	1.77674e-185
1	Srsf2	2.04302e-25	0.505632	0.976	0.93	6.29924e-21	1.28521e-185	0.546808	0.975	0.917	3.96269e-181	2.04302e-25	2.57042e-185
1	Timp2	2.94154e-184	1.58823	0.946	0.295	9.06966e-180	3.8618e-160	0.440622	0.937	0.702	1.19071e-155	3.8618e-160	5.88309e-184
1	Ctc1	1.26079e-134	0.670843	0.566	0.11	3.88741e-130	1.98444e-183	0.467489	0.422	0.176	6.11863e-179	1.26079e-134	3.96888e-183
1	Cebpz	1.42726e-46	0.6718	0.827	0.478	4.40068e-42	2.54949e-182	0.582217	0.728	0.488	7.86085e-178	1.42726e-46	5.09898e-182
1	H1f2	5.22271e-47	0.95555	0.566	0.235	1.61032e-42	2.31014e-181	1.07526	0.524	0.276	7.12287e-177	5.22271e-47	4.62029e-181
1	Slc46a3	6.79402e-118	0.557665	0.468	0.081	2.0948e-113	6.44582e-181	0.449422	0.388	0.145	1.98744e-176	6.79402e-118	1.28916e-180
1	Chd9	4.52209e-80	1.04486	0.888	0.46	1.3943e-75	7.78909e-181	0.596891	0.787	0.56	2.40161e-176	4.52209e-80	1.55782e-180
1	Itpripl1	6.99933e-51	0.397172	0.414	0.125	2.1581e-46	1.88141e-180	0.447155	0.367	0.133	5.80095e-176	6.99933e-51	3.76282e-180
1	Retreg1	1.59829e-20	0.462711	0.875	0.669	4.928e-16	3.18496e-179	0.513803	0.825	0.576	9.82017e-175	1.59829e-20	6.36991e-179
1	Arhgef6	8.06873e-26	0.384075	0.681	0.395	2.48783e-21	1.00951e-176	0.513229	0.564	0.299	3.11263e-172	8.06873e-26	2.01903e-176
1	Cep68	1.05103e-176	0.74062	0.569	0.086	3.24063e-172	2.97702e-168	0.475408	0.496	0.238	9.17906e-164	2.97702e-168	2.10205e-176
1	Hnrnph1	1.69965e-51	0.817837	0.919	0.715	5.24054e-47	1.19176e-176	0.555742	0.906	0.759	3.67457e-172	1.69965e-51	2.38353e-176
1	Hmox1	1.61625e-09	0.464664	0.597	0.443	4.98338e-05	1.26892e-176	0.848437	0.578	0.317	3.91247e-172	1.61625e-09	2.53785e-176
1	Itga9	1.54486e-118	0.616098	0.536	0.104	4.76327e-114	1.43943e-175	0.427928	0.477	0.202	4.4382e-171	1.54486e-118	2.87886e-175
1	2610203C22Rik	2.85354e-175	0.373387	0.251	0.014	8.79833e-171	1.73013e-154	0.393614	0.293	0.093	5.33451e-150	1.73013e-154	5.70709e-175
1	Camk1d	1.72265e-22	0.483641	0.82	0.585	5.31144e-18	5.96756e-175	0.568738	0.654	0.368	1.83998e-170	1.72265e-22	1.19351e-174
1	ENSMUSG00000120400	1.64065e-174	0.396629	0.298	0.022	5.05861e-170	3.06653e-104	0.304708	0.25	0.093	9.45505e-100	3.06653e-104	3.2813e-174
1	Zfp217	9.79334e-12	0.313605	0.695	0.524	3.01958e-07	4.16949e-174	0.576764	0.652	0.388	1.28558e-169	9.79334e-12	8.33898e-174
1	Ccl4	8.05938e-53	2.0092	0.793	0.533	2.48495e-48	1.17428e-173	0.992646	0.719	0.459	3.62065e-169	8.05938e-53	2.34856e-173
1	Itgb3	1.51974e-72	0.350026	0.407	0.086	4.68581e-68	1.58032e-173	0.416288	0.352	0.121	4.87261e-169	1.51974e-72	3.16065e-173
1	Trim47	1.10716e-102	0.561234	0.414	0.074	3.41371e-98	1.16825e-172	0.480114	0.359	0.129	3.60206e-168	1.10716e-102	2.3365e-172
1	Man1a2	7.79947e-65	0.895535	0.895	0.569	2.40481e-60	3.74195e-172	0.581663	0.806	0.607	1.15375e-167	7.79947e-65	7.48389e-172
1	Gpr155	1.49553e-171	0.909477	0.732	0.149	4.61118e-167	1.88449e-115	0.408208	0.633	0.408	5.81043e-111	1.88449e-115	2.99107e-171
1	ENSMUSG00000120942	4.54524e-153	0.303377	0.102	0.001	1.40143e-148	1.2125e-170	0.592493	0.168	0.017	3.73849e-166	4.54524e-153	2.42499e-170
1	Pon3	1.24123e-156	0.692738	0.549	0.089	3.82708e-152	6.68766e-170	0.443579	0.383	0.153	2.06201e-165	1.24123e-156	1.33753e-169
1	Susd3	7.43306e-52	0.437713	0.478	0.159	2.29184e-47	7.37831e-170	0.409781	0.317	0.103	2.27495e-165	7.43306e-52	1.47566e-169
1	Pld1	1.25915e-106	0.8128	0.631	0.169	3.88235e-102	2.4024e-169	0.538326	0.575	0.322	7.40732e-165	1.25915e-106	4.8048e-169
1	Etv5	8.73198e-151	0.996709	0.773	0.195	2.69233e-146	3.48111e-169	0.371151	0.818	0.496	1.07333e-164	8.73198e-151	6.96221e-169
1	Trim8	1.16094e-72	0.906489	0.939	0.616	3.57952e-68	7.13677e-168	0.534177	0.877	0.72	2.20048e-163	1.16094e-72	1.42735e-167
1	Abca1	1.25857e-17	0.371805	0.844	0.562	3.88056e-13	2.07421e-167	0.543724	0.766	0.523	6.39541e-163	1.25857e-17	4.14842e-167
1	Mob3c	5.01208e-46	0.536308	0.603	0.269	1.54537e-41	2.65304e-167	0.490189	0.463	0.217	8.18012e-163	5.01208e-46	5.30608e-167
1	Flcn	1.00523e-31	0.483588	0.715	0.426	3.09941e-27	2.67234e-165	0.524073	0.756	0.529	8.23962e-161	1.00523e-31	5.34468e-165
1	Map3k8	4.93842e-14	0.35287	0.586	0.392	1.52266e-09	9.03276e-165	0.547806	0.533	0.272	2.78507e-160	4.93842e-14	1.80655e-164
1	Leprot	1.23746e-32	0.535626	0.847	0.642	3.81546e-28	9.24098e-165	0.48584	0.817	0.594	2.84927e-160	1.23746e-32	1.8482e-164
1	Prkab1	1.45817e-41	0.506309	0.488	0.195	4.49599e-37	3.15618e-162	0.449463	0.416	0.181	9.73145e-158	1.45817e-41	6.31236e-162
1	Afap1l1	3.71968e-160	0.486347	0.353	0.034	1.14689e-155	2.99061e-103	0.336936	0.366	0.177	9.22094e-99	2.99061e-103	7.43935e-160
1	Il1rl2	2.83556e-50	0.306221	0.258	0.053	8.7429e-46	4.99697e-160	0.39489	0.286	0.086	1.54072e-155	2.83556e-50	9.99394e-160
1	Srsf9	1.47147e-13	0.31927	0.847	0.683	4.53698e-09	6.88557e-160	0.484707	0.767	0.533	2.12303e-155	1.47147e-13	1.37711e-159
1	Arsb	1.31644e-159	1.26714	0.905	0.261	4.05898e-155	8.79515e-158	0.552635	0.789	0.554	2.71181e-153	8.79515e-158	2.63288e-159
1	Mctp1	1.2284e-42	0.572327	0.468	0.17	3.78752e-38	3.56004e-159	0.558108	0.405	0.171	1.09767e-154	1.2284e-42	7.12008e-159
1	Bco2	1.33985e-73	0.513738	0.464	0.119	4.13115e-69	4.94603e-159	0.416372	0.361	0.141	1.52501e-154	1.33985e-73	9.89205e-159
1	Adam15	4.30148e-101	0.965897	0.878	0.394	1.32628e-96	5.04247e-159	0.502275	0.655	0.415	1.55475e-154	4.30148e-101	1.00849e-158
1	Ccdc93	3.24065e-59	0.475518	0.529	0.174	9.9919e-55	1.16201e-158	0.463546	0.463	0.227	3.58281e-154	3.24065e-59	2.32401e-158
1	Brd2	6.39155e-07	0.369622	0.939	0.905	0.0197071	3.49996e-158	0.610606	0.9	0.761	1.07914e-153	6.39155e-07	6.99993e-158
1	mt-Nd3	1.80925e-114	1.44566	1	0.929	5.57846e-110	6.51371e-157	0.382233	0.995	0.984	2.00837e-152	1.80925e-114	1.30274e-156
1	Oxct1	1.07747e-117	1.12215	0.929	0.404	3.32217e-113	3.25421e-156	0.502242	0.822	0.63	1.00337e-151	1.07747e-117	6.50842e-156
1	Macf1	5.48689e-82	0.939376	0.997	0.841	1.69177e-77	1.25592e-155	0.373606	0.969	0.891	3.87239e-151	5.48689e-82	2.51185e-155
1	Lrp1	4.65813e-77	0.922187	0.953	0.54	1.43624e-72	5.08769e-154	0.414293	0.843	0.573	1.56869e-149	4.65813e-77	1.01754e-153
1	Slc29a1	1.32957e-64	0.489075	0.502	0.15	4.09945e-60	5.67383e-154	0.425709	0.495	0.25	1.74941e-149	1.32957e-64	1.13477e-153
1	A830008E24Rik	2.65224e-144	0.594105	0.288	0.025	8.17765e-140	3.0218e-153	0.457891	0.304	0.103	9.3171e-149	2.65224e-144	6.04359e-153
1	Vav2	1.61941e-66	0.540723	0.563	0.182	4.99313e-62	5.83794e-153	0.445964	0.433	0.205	1.80001e-148	1.61941e-66	1.16759e-152
1	Cdh23	6.1263e-65	0.428585	0.363	0.083	1.88892e-60	4.60548e-152	0.38917	0.279	0.087	1.42001e-147	6.1263e-65	9.21097e-152
1	Usp8	1.6453e-24	0.500562	0.878	0.688	5.07297e-20	1.19967e-151	0.497904	0.806	0.616	3.69894e-147	1.6453e-24	2.39934e-151
1	Nrp1	3.62224e-33	0.483015	0.705	0.361	1.11684e-28	2.08581e-150	0.506603	0.63	0.358	6.43118e-146	3.62224e-33	4.17162e-150
1	BC035044	9.53909e-82	0.476813	0.424	0.089	2.94119e-77	8.72133e-150	0.39863	0.342	0.13	2.68905e-145	9.53909e-82	1.74427e-149
1	Rab39	4.80461e-37	0.366604	0.376	0.13	1.4814e-32	2.17698e-148	0.444196	0.353	0.143	6.71229e-144	4.80461e-37	4.35397e-148
1	Nckap5l	2.18652e-148	0.801299	0.61	0.116	6.7417e-144	2.42912e-80	0.333414	0.365	0.206	7.4897e-76	2.42912e-80	4.37304e-148
1	Nav2	8.14563e-148	1.20562	0.624	0.125	2.51154e-143	2.10443e-92	0.486948	0.55	0.361	6.48858e-88	2.10443e-92	1.62913e-147
1	Zfp90	2.66847e-72	0.566522	0.546	0.163	8.2277e-68	9.54493e-148	0.468531	0.469	0.239	2.94299e-143	2.66847e-72	1.90899e-147
1	Pwwp2a	2.19823e-60	0.710805	0.61	0.237	6.77779e-56	1.36765e-147	0.51776	0.525	0.295	4.21687e-143	2.19823e-60	2.73529e-147
1	Aagab	5.5536e-28	0.422888	0.617	0.345	1.71234e-23	2.4805e-147	0.436689	0.491	0.264	7.64812e-143	5.5536e-28	4.961e-147
1	Cds1	1.23983e-64	0.627076	0.624	0.228	3.82276e-60	2.4667e-146	0.44327	0.457	0.227	7.60558e-142	1.23983e-64	4.9334e-146
1	St3gal5	1.71279e-85	0.804298	0.753	0.268	5.28105e-81	2.97365e-146	0.454266	0.577	0.329	9.16867e-142	1.71279e-85	5.94731e-146
1	Akirin2	1.47034e-44	0.596193	0.769	0.47	4.53351e-40	1.55351e-144	0.495508	0.723	0.527	4.78994e-140	1.47034e-44	3.10702e-144
1	8030442B05Rik	8.13742e-142	0.379798	0.231	0.016	2.50901e-137	2.14645e-144	0.364886	0.198	0.04	6.61815e-140	8.13742e-142	4.2929e-144
1	Fgd3	1.66324e-19	0.41647	0.563	0.338	5.12828e-15	2.81267e-144	0.466333	0.448	0.224	8.6723e-140	1.66324e-19	5.62534e-144
1	Inpp4b	1.12367e-81	0.715474	0.668	0.204	3.46462e-77	1.46627e-143	0.340282	0.591	0.325	4.52096e-139	1.12367e-81	2.93255e-143
1	Nmt1	5.8632e-17	0.374585	0.905	0.759	1.8078e-12	1.78948e-142	0.467966	0.771	0.554	5.51749e-138	5.8632e-17	3.57895e-142
1	Slc8a1	1.52577e-25	0.679219	0.814	0.56	4.70441e-21	1.83619e-141	0.600587	0.741	0.51	5.66151e-137	1.52577e-25	3.67237e-141
1	Tmem135	2.90249e-78	0.758171	0.736	0.294	8.94925e-74	4.93488e-141	0.478042	0.622	0.399	1.52157e-136	2.90249e-78	9.86975e-141
1	Dock4	3.15264e-48	0.858588	0.844	0.488	9.72053e-44	9.63852e-141	0.512088	0.681	0.439	2.97184e-136	3.15264e-48	1.9277e-140
1	Kdm2b	2.04921e-55	0.681095	0.685	0.302	6.31834e-51	8.65016e-140	0.509736	0.549	0.323	2.6671e-135	2.04921e-55	1.73003e-139
1	Rasal3	1.58514e-49	0.511267	0.678	0.293	4.88746e-45	7.3674e-138	0.365196	0.41	0.187	2.27159e-133	1.58514e-49	1.47348e-137
1	Plxnb2	3.88841e-81	0.940611	0.919	0.546	1.19891e-76	3.39981e-137	0.413914	0.526	0.296	1.04826e-132	3.88841e-81	6.79962e-137
1	P2rx7	2.18337e-59	0.668586	0.773	0.363	6.73198e-55	4.51912e-137	0.306074	0.737	0.483	1.39338e-132	2.18337e-59	9.03824e-137
1	Tmem176b	8.86216e-48	0.66989	0.885	0.478	2.73247e-43	1.86224e-136	0.424956	0.883	0.639	5.74184e-132	8.86216e-48	3.72448e-136
1	Lpcat3	2.09539e-58	0.722888	0.729	0.345	6.4607e-54	4.62045e-136	0.478482	0.596	0.369	1.42462e-131	2.09539e-58	9.24091e-136
1	Ildr2	1.49903e-108	0.355338	0.241	0.023	4.62195e-104	1.33029e-135	0.421842	0.38	0.163	4.10168e-131	1.49903e-108	2.66058e-135
1	Sqor	6.05829e-33	0.407064	0.468	0.201	1.86795e-28	9.69198e-135	0.408916	0.429	0.212	2.98833e-130	6.05829e-33	1.9384e-134
1	Nr4a1	2.72871e-08	0.620213	0.827	0.804	0.000841342	1.07767e-134	0.833516	0.78	0.601	3.3228e-130	2.72871e-08	2.15535e-134
1	Rad51b	3.09725e-42	0.458796	0.305	0.082	9.54975e-38	1.63302e-134	0.556402	0.347	0.145	5.03509e-130	3.09725e-42	3.26604e-134
1	Rela	1.04196e-23	0.473823	0.732	0.519	3.21269e-19	1.24026e-133	0.427293	0.493	0.273	3.82408e-129	1.04196e-23	2.48051e-133
1	Med12l	1.39851e-41	0.483708	0.515	0.207	4.31204e-37	3.04094e-133	0.453559	0.49	0.266	9.37613e-129	1.39851e-41	6.08188e-133
1	Ddit3	1.4797e-37	0.711457	0.634	0.325	4.56237e-33	4.61709e-133	0.584664	0.492	0.273	1.42359e-128	1.4797e-37	9.23417e-133
1	Tcim	6.55692e-133	0.559774	0.142	0.005	2.02169e-128	5.94417e-28	0.314961	0.105	0.047	1.83277e-23	5.94417e-28	1.31138e-132
1	Herc2	1.78042e-71	0.853035	0.851	0.463	5.48956e-67	1.1251e-132	0.475066	0.741	0.548	3.46904e-128	1.78042e-71	2.25021e-132
1	Tsc22d2	1.09182e-64	1.17553	0.773	0.384	3.36641e-60	2.48592e-131	0.690002	0.624	0.427	7.66485e-127	1.09182e-64	4.97185e-131
1	Rnf144b	4.78145e-131	0.51568	0.383	0.05	1.47427e-126	2.21393e-108	0.355293	0.387	0.194	6.82622e-104	2.21393e-108	9.5629e-131
1	Diaph2	8.77844e-12	0.366623	0.837	0.644	2.70666e-07	7.94266e-131	0.510656	0.722	0.498	2.44896e-126	8.77844e-12	1.58853e-130
1	Rab11fip5	5.67068e-60	0.609776	0.536	0.183	1.74844e-55	1.18934e-130	0.453885	0.501	0.28	3.6671e-126	5.67068e-60	2.37868e-130
1	Foxn3	3.1802e-35	0.670893	0.895	0.632	9.8055e-31	2.22924e-130	0.402422	0.868	0.682	6.87343e-126	3.1802e-35	4.45849e-130
1	Hnrnpu	3.59818e-35	0.522593	0.993	0.958	1.10943e-30	1.78606e-128	0.389982	0.984	0.953	5.50695e-124	3.59818e-35	3.57212e-128
1	Batf	6.20105e-18	0.369459	0.363	0.181	1.91197e-13	8.19437e-127	0.426896	0.28	0.1	2.52657e-122	6.20105e-18	1.63887e-126
1	Cd9	2.37806e-110	1.3463	0.969	0.513	7.33227e-106	1.47755e-126	0.398456	0.955	0.732	4.55574e-122	2.37806e-110	2.95511e-126
1	Tmem273	2.06749e-41	0.318804	0.305	0.083	6.37469e-37	1.66953e-126	0.323527	0.249	0.08	5.14767e-122	2.06749e-41	3.33907e-126
1	Itpkc	3.9741e-64	0.604284	0.39	0.098	1.22533e-59	7.8566e-126	0.433641	0.301	0.117	2.42242e-121	3.9741e-64	1.57132e-125
1	Ldlrad4	9.97327e-91	1.03253	0.807	0.308	3.07506e-86	1.62975e-125	0.540396	0.601	0.381	5.02499e-121	9.97327e-91	3.25949e-125
1	Maml3	4.92078e-67	0.754511	0.583	0.194	1.51723e-62	5.51298e-125	0.488737	0.507	0.28	1.69982e-120	4.92078e-67	1.1026e-124
1	Slc39a8	2.96915e-112	0.36342	0.288	0.032	9.15478e-108	5.72048e-123	0.337653	0.266	0.094	1.76379e-118	2.96915e-112	1.1441e-122
1	Clcf1	1.21552e-43	0.6654	0.468	0.165	3.74781e-39	3.02135e-122	0.454468	0.326	0.135	9.31572e-118	1.21552e-43	6.04269e-122
1	Zfp385a	2.30651e-19	0.37302	0.776	0.529	7.11165e-15	3.26483e-121	0.423141	0.592	0.373	1.00665e-116	2.30651e-19	6.52966e-121
1	Cebpd	7.11938e-79	1.03566	0.664	0.23	2.19512e-74	2.48931e-120	0.52103	0.605	0.378	7.67528e-116	7.11938e-79	4.97862e-120
1	Zfp808	4.0206e-88	0.391034	0.315	0.049	1.23967e-83	6.13116e-120	0.404241	0.295	0.116	1.89042e-115	4.0206e-88	1.22623e-119
1	Lactb2	2.10177e-28	0.330893	0.434	0.186	6.48038e-24	6.30051e-120	0.379455	0.408	0.206	1.94264e-115	2.10177e-28	1.2601e-119
1	Etf1	2.90896e-10	0.358519	0.871	0.792	8.96921e-06	2.64025e-119	0.50487	0.758	0.591	8.14068e-115	2.90896e-10	5.2805e-119
1	Hmga2-ps1	1.0133e-34	0.412276	0.41	0.151	3.12429e-30	7.50264e-119	0.367846	0.267	0.096	2.31329e-114	1.0133e-34	1.50053e-118
1	Stambpl1	1.34398e-38	0.392485	0.481	0.186	4.1439e-34	1.01926e-118	0.413481	0.483	0.273	3.1427e-114	1.34398e-38	2.03853e-118
1	Arhgap4	2.66608e-21	0.379668	0.525	0.284	8.22031e-17	3.10173e-118	0.396556	0.384	0.188	9.56357e-114	2.66608e-21	6.20347e-118
1	Large1	2.34573e-117	0.813345	0.468	0.082	7.23258e-113	9.11271e-79	0.423592	0.381	0.219	2.80972e-74	9.11271e-79	4.69145e-117
1	Tbpl1	1.12723e-33	0.633397	0.614	0.337	3.4756e-29	7.84982e-117	0.52154	0.5	0.306	2.42033e-112	1.12723e-33	1.56996e-116
1	Gab2	2.62835e-12	0.372202	0.797	0.597	8.104e-08	7.97584e-117	0.489431	0.622	0.412	2.45919e-112	2.62835e-12	1.59517e-116
1	Abhd17c	2.82143e-64	0.57507	0.569	0.193	8.6993e-60	1.08521e-116	0.400769	0.566	0.356	3.34604e-112	2.82143e-64	2.17043e-116
1	Ccng2	1.24911e-12	0.323217	0.597	0.41	3.85138e-08	4.88309e-116	0.453424	0.524	0.321	1.5056e-111	1.24911e-12	9.76617e-116
1	Specc1	7.27067e-116	0.928839	0.803	0.25	2.24177e-111	1.46244e-100	0.393464	0.644	0.442	4.50915e-96	1.46244e-100	1.45413e-115
1	Tfpi	2.09178e-92	0.358411	0.332	0.052	6.44958e-88	2.95431e-114	0.331885	0.295	0.12	9.10902e-110	2.09178e-92	5.90862e-114
1	Plxdc1	1.07726e-32	0.324897	0.356	0.124	3.32152e-28	1.0938e-112	0.326679	0.273	0.105	3.37251e-108	1.07726e-32	2.1876e-112
1	Myo7a	3.32849e-42	0.334292	0.39	0.125	1.02627e-37	2.55535e-112	0.351825	0.38	0.19	7.8789e-108	3.32849e-42	5.11069e-112
1	Sfpq	9.07946e-35	0.598148	0.969	0.874	2.79947e-30	2.96588e-112	0.375843	0.944	0.865	9.1447e-108	9.07946e-35	5.93176e-112
1	Slmap	2.9976e-43	0.607894	0.708	0.375	9.24249e-39	1.17738e-111	0.447134	0.584	0.391	3.63021e-107	2.9976e-43	2.35475e-111
1	Gxylt1	4.88068e-20	0.392622	0.58	0.347	1.50486e-15	1.19223e-111	0.426398	0.5	0.301	3.67601e-107	4.88068e-20	2.38447e-111
1	Cotl1	2.59577e-18	0.390372	0.939	0.813	8.00354e-14	3.30782e-111	0.438306	0.707	0.487	1.0199e-106	2.59577e-18	6.61564e-111
1	Pla2g4a	9.25507e-20	0.430777	0.586	0.34	2.85362e-15	6.24001e-110	0.426847	0.475	0.265	1.92398e-105	9.25507e-20	1.248e-109
1	Pacc1	1.64221e-49	0.368967	0.383	0.11	5.06341e-45	7.36003e-110	0.343744	0.311	0.137	2.26932e-105	1.64221e-49	1.47201e-109
1	Hltf	1.49094e-18	0.421461	0.664	0.437	4.59701e-14	3.92725e-109	0.433951	0.603	0.399	1.21089e-104	1.49094e-18	7.85449e-109
1	Arhgap22	1.73759e-45	0.506098	0.431	0.146	5.35751e-41	4.49837e-109	0.377329	0.283	0.115	1.38698e-104	1.73759e-45	8.99674e-109
1	Lpin2	1.49756e-28	0.503357	0.8	0.539	4.61744e-24	6.44826e-109	0.444728	0.564	0.363	1.98819e-104	1.49756e-28	1.28965e-108
1	Mlec	4.80325e-58	0.778705	0.878	0.565	1.48099e-53	2.27931e-108	0.401521	0.753	0.572	7.0278e-104	4.80325e-58	4.55862e-108
1	Plk3	5.37567e-35	0.658608	0.773	0.458	1.65748e-30	3.47074e-108	0.433078	0.486	0.282	1.07013e-103	5.37567e-35	6.94148e-108
1	Tmem176a	4.33939e-35	0.389377	0.692	0.334	1.33796e-30	1.20474e-107	0.344845	0.661	0.422	3.71456e-103	4.33939e-35	2.40947e-107
1	Rogdi	2.34854e-42	0.344324	0.61	0.258	7.24125e-38	4.27253e-107	0.338132	0.476	0.276	1.31735e-102	2.34854e-42	8.54505e-107
1	Zfp715	1.86786e-47	0.475266	0.437	0.145	5.75916e-43	5.55118e-106	0.415072	0.41	0.225	1.7116e-101	1.86786e-47	1.11024e-105
1	Wdfy2	1.74405e-27	0.453131	0.624	0.344	5.37743e-23	7.79189e-106	0.410763	0.575	0.375	2.40247e-101	1.74405e-27	1.55838e-105
1	Kpnb1	3.33033e-29	0.47796	0.875	0.658	1.02684e-24	8.48304e-106	0.407001	0.813	0.659	2.61558e-101	3.33033e-29	1.69661e-105
1	Arid1a	1.11884e-14	0.318496	0.966	0.872	3.44972e-10	1.60864e-105	0.348042	0.923	0.815	4.95993e-101	1.11884e-14	3.21728e-105
1	Srsf6	2.88179e-24	0.477259	0.871	0.723	8.88543e-20	1.91122e-105	0.401801	0.864	0.729	5.89286e-101	2.88179e-24	3.82243e-105
1	Sgpl1	8.5213e-13	0.315179	0.949	0.777	2.62737e-08	2.55812e-105	0.367743	0.871	0.695	7.88745e-101	8.5213e-13	5.11624e-105
1	Snx17	8.81376e-25	0.401815	0.719	0.471	2.71755e-20	5.01334e-105	0.397213	0.669	0.493	1.54576e-100	8.81376e-25	1.00267e-104
1	Clint1	9.92108e-15	0.305781	0.875	0.759	3.05897e-10	8.52262e-105	0.403474	0.798	0.622	2.62778e-100	9.92108e-15	1.70452e-104
1	Mgat1	2.47606e-40	0.62856	0.817	0.528	7.63443e-36	1.75567e-104	0.401103	0.543	0.349	5.41325e-100	2.47606e-40	3.51133e-104
1	Mcfd2	8.89384e-24	0.352986	0.685	0.412	2.74224e-19	2.32266e-104	0.382576	0.598	0.408	7.16146e-100	8.89384e-24	4.64532e-104
1	Hsp90b1	9.30071e-29	0.466485	0.997	0.955	2.86769e-24	3.50937e-104	0.313122	0.987	0.942	1.08204e-99	9.30071e-29	7.01874e-104
1	Gspt1	2.03921e-27	0.453508	0.763	0.49	6.28749e-23	9.94564e-104	0.404693	0.688	0.504	3.06654e-99	2.03921e-27	1.98913e-103
1	Erf	3.97189e-79	0.845545	0.725	0.295	1.22465e-74	1.11732e-102	0.346916	0.338	0.162	3.44504e-98	3.97189e-79	2.23464e-102
1	Mpi	4.13728e-55	0.477346	0.431	0.13	1.27565e-50	2.79625e-101	0.378301	0.417	0.23	8.62169e-97	4.13728e-55	5.59251e-101
1	Snx29	4.42307e-90	0.662142	0.464	0.102	1.36376e-85	5.30656e-100	0.400042	0.313	0.141	1.63617e-95	4.42307e-90	1.06131e-99
1	Tbc1d22a	2.08484e-20	0.372844	0.614	0.376	6.42818e-16	5.35022e-100	0.379143	0.461	0.275	1.64963e-95	2.08484e-20	1.07004e-99
1	Itpr2	2.9211e-53	0.716439	0.749	0.377	9.00663e-49	2.21958e-99	0.379347	0.693	0.482	6.84364e-95	2.9211e-53	4.43917e-99
1	Iffo1	1.30334e-71	0.726935	0.634	0.226	4.01859e-67	1.19364e-98	0.415436	0.573	0.389	3.68036e-94	1.30334e-71	2.38729e-98
1	Acer3	1.78842e-11	0.312462	0.803	0.605	5.51424e-07	1.47479e-98	0.399055	0.652	0.428	4.54723e-94	1.78842e-11	2.94958e-98
1	Sbf2	1.98781e-98	0.806743	0.678	0.199	6.12903e-94	1.29839e-75	0.358619	0.623	0.456	4.00332e-71	1.29839e-75	3.97563e-98
1	Lrp5	2.29683e-49	0.486722	0.508	0.182	7.08182e-45	2.49213e-97	0.348724	0.435	0.249	7.68399e-93	2.29683e-49	4.98427e-97
1	Hps4	2.2063e-82	0.667226	0.61	0.19	6.80267e-78	3.67746e-97	0.311783	0.308	0.143	1.13387e-92	2.2063e-82	7.35492e-97
1	Pnpla7	1.52701e-17	0.38923	0.597	0.376	4.70822e-13	6.02257e-96	0.373098	0.533	0.332	1.85694e-91	1.52701e-17	1.20451e-95
1	Smad3	1.00106e-29	0.375992	0.563	0.269	3.08657e-25	6.54504e-95	0.352826	0.46	0.271	2.01803e-90	1.00106e-29	1.30901e-94
1	Slc12a6	9.65872e-15	0.316698	0.634	0.438	2.97807e-10	7.20284e-94	0.377414	0.579	0.406	2.22085e-89	9.65872e-15	1.44057e-93
1	Taf7	4.12939e-11	0.330141	0.542	0.388	1.27322e-06	9.90263e-94	0.403934	0.488	0.311	3.05328e-89	4.12939e-11	1.98053e-93
1	Rnf2	2.05397e-30	0.428309	0.61	0.322	6.33301e-26	1.79686e-93	0.378725	0.531	0.354	5.54025e-89	2.05397e-30	3.59371e-93
1	Ptms	1.77739e-43	0.706998	1	0.864	5.48022e-39	1.83876e-93	0.431047	0.739	0.569	5.66944e-89	1.77739e-43	3.67751e-93
1	Fkbp15	1.84829e-23	0.451825	0.746	0.506	5.69883e-19	4.09011e-93	0.387917	0.59	0.409	1.2611e-88	1.84829e-23	8.18022e-93
1	Ptp4a3	2.21435e-66	0.503285	0.6	0.199	6.82751e-62	6.20762e-93	0.316761	0.373	0.198	1.914e-88	2.21435e-66	1.24152e-92
1	Cerk	3.2572e-28	0.45853	0.705	0.43	1.00429e-23	3.249e-91	0.359809	0.556	0.374	1.00176e-86	3.2572e-28	6.49799e-91
1	Asap1	1.14156e-30	0.541686	0.759	0.467	3.51978e-26	1.77513e-89	0.391706	0.678	0.498	5.47327e-85	1.14156e-30	3.55027e-89
1	Snx13	2.80018e-28	0.484657	0.668	0.399	8.63379e-24	5.57016e-89	0.404362	0.608	0.438	1.71745e-84	2.80018e-28	1.11403e-88
1	Abl1	1.12139e-35	0.544207	0.688	0.399	3.45758e-31	1.39218e-88	0.357761	0.586	0.407	4.29252e-84	1.12139e-35	2.78437e-88
1	Acap2	7.38265e-33	0.533812	0.854	0.645	2.27629e-28	5.5059e-88	0.339566	0.848	0.695	1.69763e-83	7.38265e-33	1.10118e-87
1	Kcnk13	7.38251e-88	0.552362	0.471	0.106	2.27625e-83	1.59468e-87	0.327734	0.424	0.245	4.91688e-83	1.59468e-87	1.4765e-87
1	Pcf11	6.77035e-19	0.478652	0.746	0.57	2.0875e-14	5.45868e-87	0.438298	0.681	0.551	1.68308e-82	6.77035e-19	1.09174e-86
1	Akr1b10	4.57701e-54	0.580243	0.59	0.229	1.41123e-49	4.39993e-86	0.3354	0.434	0.259	1.35663e-81	4.57701e-54	8.79987e-86
1	Vamp3	3.70036e-19	0.413976	0.847	0.675	1.14093e-14	3.5618e-85	0.346142	0.806	0.646	1.09821e-80	3.70036e-19	7.12361e-85
1	ENSMUSG00000120992	5.34961e-05	0.831394	0.525	0.461	1	7.60145e-85	0.749718	0.482	0.304	2.34376e-80	5.34961e-05	1.52029e-84
1	Wdr44	2.27856e-29	0.504264	0.546	0.275	7.02547e-25	1.11991e-84	0.373988	0.425	0.256	3.45303e-80	2.27856e-29	2.23983e-84
1	Eya4	1.83793e-84	0.464878	0.356	0.064	5.66689e-80	4.69432e-72	0.331365	0.367	0.213	1.4474e-67	4.69432e-72	3.67586e-84
1	Zscan26	4.11117e-23	0.443258	0.583	0.347	1.2676e-18	2.09297e-82	0.356506	0.605	0.442	6.45324e-78	4.11117e-23	4.18593e-82
1	Gm26542	3.92407e-75	0.535161	0.237	0.033	1.20991e-70	1.66554e-81	0.36613	0.183	0.062	5.13535e-77	3.92407e-75	3.33107e-81
1	Zbtb2	5.01471e-12	0.374386	0.386	0.229	1.54619e-07	2.53355e-81	0.423804	0.359	0.199	7.81169e-77	5.01471e-12	5.06709e-81
1	Ppp1r21	1.49599e-21	0.369546	0.695	0.452	4.6126e-17	3.36714e-80	0.359644	0.69	0.523	1.03819e-75	1.49599e-21	6.73429e-80
1	Midn	9.48104e-20	0.567158	0.797	0.627	2.92329e-15	2.07692e-79	0.395585	0.729	0.567	6.40375e-75	9.48104e-20	4.15383e-79
1	Tcf7l2	2.09945e-15	0.327856	0.539	0.319	6.47322e-11	2.25188e-79	0.332236	0.571	0.381	6.94322e-75	2.09945e-15	4.50376e-79
1	Prkcb	4.81502e-61	0.846905	0.888	0.495	1.48462e-56	2.72172e-79	0.312994	0.837	0.632	8.39189e-75	4.81502e-61	5.44344e-79
1	Mtr	1.48203e-33	0.353471	0.454	0.185	4.56954e-29	3.88323e-79	0.300348	0.331	0.176	1.19732e-74	1.48203e-33	7.76645e-79
1	Adam10	5.36379e-18	0.36493	0.892	0.732	1.65382e-13	6.27092e-79	0.363388	0.791	0.646	1.93351e-74	5.36379e-18	1.25418e-78
1	Sfmbt1	3.20312e-63	0.685941	0.644	0.243	9.87617e-59	2.49415e-78	0.343393	0.527	0.353	7.69022e-74	3.20312e-63	4.98831e-78
1	Tra2b	2.86333e-18	0.426279	0.932	0.82	8.8285e-14	1.29005e-77	0.369038	0.866	0.773	3.97762e-73	2.86333e-18	2.5801e-77
1	Nucb1	2.00265e-29	0.504159	0.871	0.675	6.17478e-25	1.30017e-77	0.315015	0.785	0.631	4.00881e-73	2.00265e-29	2.60034e-77
1	Ykt6	4.99294e-17	0.303372	0.58	0.365	1.53947e-12	3.26828e-77	0.32459	0.465	0.307	1.00771e-72	4.99294e-17	6.53656e-77
1	St6gal1	1.142e-76	0.528226	0.488	0.12	3.52113e-72	2.62678e-65	0.304522	0.618	0.443	8.09916e-61	2.62678e-65	2.284e-76
1	Hs6st1	3.72566e-33	0.449915	0.566	0.272	1.14873e-28	2.35336e-76	0.331048	0.549	0.387	7.2561e-72	3.72566e-33	4.70671e-76
1	Fbrsl1	7.96541e-36	0.55862	0.878	0.583	2.45598e-31	1.21032e-75	0.325996	0.754	0.583	3.73178e-71	7.96541e-36	2.42064e-75
1	Sec14l1	1.10987e-32	0.551662	0.759	0.497	3.42207e-28	2.11929e-75	0.326595	0.617	0.451	6.53442e-71	1.10987e-32	4.23859e-75
1	Fam117b	1.84876e-15	0.339933	0.736	0.515	5.70028e-11	1.75046e-74	0.361578	0.67	0.521	5.39719e-70	1.84876e-15	3.50092e-74
1	Rptor	5.2008e-51	0.480275	0.532	0.19	1.60356e-46	7.52726e-74	0.339728	0.344	0.192	2.32088e-69	5.2008e-51	1.50545e-73
1	Mapre1	2.14133e-25	0.463501	0.915	0.827	6.60235e-21	5.56459e-73	0.331271	0.844	0.745	1.71573e-68	2.14133e-25	1.11292e-72
1	Kcnj2	5.33143e-35	0.320981	0.227	0.056	1.64384e-30	1.04201e-72	0.3018	0.224	0.098	3.21283e-68	5.33143e-35	2.08402e-72
1	Snx24	1.96805e-38	0.492905	0.424	0.152	6.06809e-34	1.79358e-72	0.371957	0.36	0.208	5.53015e-68	1.96805e-38	3.58716e-72
1	Sgk1	1.1599e-12	0.498481	0.756	0.558	3.57631e-08	4.44116e-72	0.526355	0.673	0.503	1.36934e-67	1.1599e-12	8.88231e-72
1	Dnajb1	1.27786e-19	0.938188	0.647	0.499	3.94004e-15	6.30033e-72	0.559726	0.611	0.483	1.94258e-67	1.27786e-19	1.26007e-71
1	Maml2	4.07351e-57	0.742375	0.729	0.322	1.25599e-52	8.17655e-72	0.361565	0.673	0.502	2.52107e-67	4.07351e-57	1.63531e-71
1	Tbc1d5	2.09395e-27	0.547601	0.675	0.399	6.45629e-23	6.98074e-71	0.417127	0.537	0.38	2.15237e-66	2.09395e-27	1.39615e-70
1	Kbtbd2	1.95503e-27	0.418458	0.658	0.378	6.02795e-23	3.64203e-70	0.325569	0.563	0.412	1.12295e-65	1.95503e-27	7.28405e-70
1	Pkig	1.2449e-15	0.315351	0.647	0.457	3.8384e-11	3.6537e-70	0.31056	0.542	0.385	1.12654e-65	1.2449e-15	7.30739e-70
1	Gnl3	2.0296e-27	0.509925	0.542	0.281	6.25788e-23	5.25395e-70	0.388977	0.562	0.406	1.61995e-65	2.0296e-27	1.05079e-69
1	Dpy19l4	6.05802e-68	0.692225	0.671	0.253	1.86787e-63	6.27271e-62	0.337304	0.559	0.417	1.93406e-57	6.27271e-62	1.2116e-67
1	Sowahc	1.4904e-08	0.358698	0.692	0.565	0.000459534	8.83095e-67	0.409822	0.59	0.426	2.72285e-62	1.4904e-08	1.76619e-66
1	Nop58	1.38549e-23	0.403146	0.651	0.367	4.2719e-19	3.43866e-66	0.384907	0.589	0.434	1.06024e-61	1.38549e-23	6.87732e-66
1	Klf2	9.77032e-12	1.01377	0.586	0.402	3.01248e-07	6.31784e-66	0.600691	0.473	0.308	1.94798e-61	9.77032e-12	1.26357e-65
1	Ppm1h	1.20598e-09	0.347062	0.675	0.534	3.7184e-05	4.93296e-65	0.329816	0.549	0.384	1.52098e-60	1.20598e-09	9.86592e-65
1	Naa35	2.13256e-26	0.374011	0.586	0.316	6.57533e-22	1.19543e-64	0.309423	0.497	0.349	3.68587e-60	2.13256e-26	2.39086e-64
1	Wdfy3	2.33321e-64	0.761523	0.78	0.374	7.19398e-60	6.82791e-59	0.300802	0.71	0.574	2.10525e-54	6.82791e-59	4.66642e-64
1	Abcb1b	2.75748e-20	0.358794	0.41	0.198	8.50213e-16	9.37192e-64	0.315299	0.356	0.212	2.88965e-59	2.75748e-20	1.87438e-63
1	Fnip1	9.18984e-14	0.4308	0.783	0.603	2.8335e-09	1.29263e-63	0.363552	0.699	0.569	3.98558e-59	9.18984e-14	2.58527e-63
1	Phf14	8.37254e-25	0.522745	0.783	0.539	2.5815e-20	2.10761e-61	0.327041	0.691	0.562	6.49838e-57	8.37254e-25	4.21521e-61
1	Mfap3	1.63235e-14	0.345936	0.603	0.423	5.03303e-10	6.80247e-60	0.317752	0.561	0.421	2.09741e-55	1.63235e-14	1.36049e-59
1	Rnf180	1.76577e-59	0.640866	0.58	0.211	5.4444e-55	7.7988e-59	0.315486	0.446	0.298	2.4046e-54	7.7988e-59	3.53154e-59
1	Chd4	2.35183e-21	0.576216	0.959	0.891	7.25141e-17	1.83564e-58	0.380101	0.871	0.811	5.65982e-54	2.35183e-21	3.67127e-58
1	Bbs9	1.19273e-57	0.458301	0.319	0.071	3.67755e-53	2.22748e-47	0.308644	0.229	0.123	6.86799e-43	2.22748e-47	2.38546e-57
1	Rcan1	4.30297e-49	1.20953	0.441	0.15	1.32673e-44	2.36065e-39	0.336215	0.257	0.155	7.27858e-35	2.36065e-39	8.60594e-49
1	Dnm2	1.72646e-10	0.308593	0.79	0.655	5.32318e-06	1.67181e-47	0.322676	0.53	0.411	5.15471e-43	1.72646e-10	3.34363e-47
1	Kansl1	6.30772e-10	0.316501	0.82	0.678	1.94486e-05	4.53874e-41	0.325749	0.724	0.649	1.39943e-36	6.30772e-10	9.07749e-41
1	Cask	2.02828e-35	0.634475	0.586	0.287	6.25379e-31	6.31495e-40	0.311197	0.57	0.456	1.94709e-35	2.02828e-35	1.26299e-39
1	Hdac9	1.83926e-26	0.552963	0.444	0.215	5.67098e-22	4.60323e-39	0.32109	0.404	0.297	1.41932e-34	1.83926e-26	9.20647e-39
1	Otud1	8.91721e-17	0.600969	0.417	0.225	2.74944e-12	8.35053e-34	0.547923	0.35	0.252	2.57472e-29	8.91721e-17	1.67011e-33
1	Kazn	2.82926e-07	1.01642	0.166	0.086	0.00872346	1.44584e-24	0.64619	0.191	0.306	4.45795e-20	2.82926e-07	2.89168e-24
2	Cd177	0	0.844117	0.4	0.047	0	0	0.646846	0.29	0.001	0	0	0
2	Chil3	2.79513e-306	2.19016	0.632	0.238	8.61821e-302	0	3.44909	0.697	0.021	0	2.79513e-306	0
2	Gda	1.7685e-236	1.3145	0.789	0.413	5.45282e-232	0	2.41712	0.845	0.055	0	1.7685e-236	0
2	Gm36161	7.24392e-246	0.787184	0.953	0.564	2.23352e-241	0	2.01489	0.89	0.063	0	7.24392e-246	0
2	Gpr141	0	1.20537	0.964	0.574	0	0	3.09203	0.981	0.059	0	0	0
2	Ifitm6	0	1.49705	0.797	0.23	0	0	2.69895	0.787	0.025	0	0	0
2	Klra2	0	1.24644	0.955	0.514	0	0	2.45021	0.865	0.049	0	0	0
2	Krt80	0	0.881472	0.625	0.196	0	0	1.35785	0.606	0.021	0	0	0
2	Ms4a8a	0	1.19264	0.732	0.232	0	0	1.31997	0.587	0.019	0	0	0
2	Sell	0	1.33431	0.962	0.56	0	0	3.42288	0.916	0.052	0	0	0
2	Sirpb1c	2.02168e-255	0.904532	0.963	0.54	6.23345e-251	0	2.62102	0.968	0.052	0	2.02168e-255	0
2	Wfdc17	0	1.59517	0.913	0.39	0	6.18489e-287	2.62502	0.903	0.084	1.90699e-282	6.18489e-287	0
2	Ccr2	0	1.65448	0.986	0.691	0	6.42351e-276	3.92252	0.948	0.1	1.98056e-271	6.42351e-276	0
2	Emilin2	0	1.56881	0.909	0.42	0	1.17789e-264	2.40959	0.923	0.098	3.6318e-260	1.17789e-264	0
2	S100a4	0	1.04153	0.747	0.261	0	2.59644e-228	1.77066	0.735	0.065	8.00561e-224	2.59644e-228	0
2	Xdh	0	0.941513	0.9	0.535	0	1.38253e-214	1.92969	0.897	0.113	4.26274e-210	1.38253e-214	0
2	Plac8	0	1.7581	1	0.854	0	1.25291e-201	4.80777	0.981	0.172	3.8631e-197	1.25291e-201	0
2	Msrb1	0	1.06445	0.981	0.66	0	1.09385e-170	2.26322	0.968	0.197	3.37266e-166	1.09385e-170	0
2	Ifi211	0	1.03691	0.99	0.71	0	1.02392e-159	2.46789	0.903	0.169	3.15705e-155	1.02392e-159	0
2	S100a6	0	1.17474	0.979	0.681	0	4.62583e-156	2.72822	0.994	0.221	1.42628e-151	4.62583e-156	0
2	Tgm2	0	1.79512	0.958	0.613	0	5.88172e-146	3.34307	0.871	0.18	1.81351e-141	5.88172e-146	0
2	Ifi209	0	1.00658	0.996	0.859	0	2.79235e-133	2.76793	0.968	0.255	8.60964e-129	2.79235e-133	0
2	Ms4a6c	0	0.995549	0.999	0.77	0	2.01455e-125	3.20459	0.974	0.317	6.21147e-121	2.01455e-125	0
2	Ifitm3	0	1.0937	0.999	0.865	0	1.88754e-119	3.21701	0.994	0.372	5.81986e-115	1.88754e-119	0
2	Ifi204	0	1.21324	0.998	0.771	0	3.49507e-110	2.68885	0.935	0.306	1.07763e-105	3.49507e-110	0
2	Gbp2	0	1.86897	0.999	0.861	0	1.34528e-107	3.97619	0.897	0.296	4.14791e-103	1.34528e-107	0
2	Slfn5	0	1.22897	0.995	0.807	0	1.61945e-105	2.8941	0.942	0.324	4.99324e-101	1.61945e-105	0
2	Ifi207	0	1.10073	0.988	0.678	0	1.334e-104	1.92707	0.923	0.244	4.11311e-100	1.334e-104	0
2	Samhd1	0	1.32702	1	0.951	0	2.41949e-99	3.33242	1	0.577	7.46001e-95	2.41949e-99	0
2	Ccl9	0	1.9311	0.833	0.244	0	6.53404e-94	2.25828	0.91	0.294	2.01464e-89	6.53404e-94	0
2	1600014C10Rik	0	0.958022	0.979	0.751	0	2.31776e-93	1.88426	0.91	0.316	7.14635e-89	2.31776e-93	0
2	Lyz2	0	1.4785	0.994	0.797	0	1.14387e-90	3.26533	1	0.566	3.5269e-86	1.14387e-90	0
2	Srgn	0	1.04901	1	0.959	0	4.85532e-82	2.44435	0.987	0.677	1.49704e-77	4.85532e-82	0
2	Alox5ap	0	1.14919	0.993	0.707	0	3.33274e-80	1.91651	0.987	0.552	1.02758e-75	3.33274e-80	0
2	Pnp	0	1.1656	0.996	0.823	0	1.16767e-77	1.98519	0.994	0.701	3.60026e-73	1.16767e-77	0
2	Cebpb	0	0.977502	0.995	0.742	0	2.54115e-68	1.53571	0.961	0.496	7.83512e-64	2.54115e-68	0
2	Fcgr1	0	1.06555	0.984	0.67	0	5.05182e-54	1.49554	0.91	0.518	1.55763e-49	5.05182e-54	0
2	Ncf2	0	0.953597	0.963	0.628	0	4.44335e-43	1.03781	0.916	0.518	1.37002e-38	4.44335e-43	0
2	Vcan	0	1.5862	0.502	0.067	0	4.29702e-39	0.663457	0.606	0.178	1.3249e-34	4.29702e-39	0
2	Ccl6	0	1.91626	0.829	0.349	0	4.3106e-39	1.7769	0.806	0.391	1.32909e-34	4.3106e-39	0
2	Nhsl2	0	0.736874	0.453	0.087	0	2.76681e-36	0.748531	0.426	0.112	8.53091e-32	2.76681e-36	0
2	Ifi47	1.81632e-307	0.922722	0.991	0.861	5.60024e-303	9.60337e-148	2.74687	0.929	0.198	2.96101e-143	9.60337e-148	3.63263e-307
2	Cyrib	1.98429e-307	0.76738	0.999	0.938	6.11815e-303	5.00569e-64	1.42718	0.987	0.775	1.5434e-59	5.00569e-64	3.96857e-307
2	Fgr	2.99755e-222	0.799858	0.905	0.559	9.24234e-218	4.34267e-305	2.02155	0.884	0.071	1.33898e-300	2.99755e-222	8.68534e-305
2	Thbs1	1.44964e-302	1.88666	0.86	0.502	4.46967e-298	9.60184e-229	4.64674	0.897	0.113	2.96054e-224	9.60184e-229	2.89928e-302
2	F5	3.13366e-161	0.464484	0.238	0.048	9.662e-157	6.14776e-302	0.850271	0.329	0.007	1.89554e-297	3.13366e-161	1.22955e-301
2	Ifitm2	2.66238e-301	1.05985	0.964	0.651	8.20891e-297	4.24887e-185	2.44881	0.955	0.162	1.31005e-180	4.24887e-185	5.32476e-301
2	Mmp8	1.93649e-142	0.445413	0.182	0.031	5.97078e-138	5.76482e-301	2.26459	0.277	0.004	1.77747e-296	1.93649e-142	1.15296e-300
2	Slfn4	1.0464e-188	1.14999	0.854	0.541	3.22638e-184	7.57343e-300	3.34611	0.813	0.059	2.33512e-295	1.0464e-188	1.51469e-299
2	Mpeg1	9.56641e-300	0.818296	0.999	0.78	2.94961e-295	1.7936e-53	1.23873	0.994	0.627	5.53021e-49	1.7936e-53	1.91328e-299
2	Ccr1	7.17009e-299	1.22309	0.877	0.474	2.21075e-294	3.89605e-164	1.9682	0.826	0.116	1.20127e-159	3.89605e-164	1.43402e-298
2	Pitpna	9.54583e-299	0.849992	0.994	0.907	2.94326e-294	1.73064e-74	1.6655	0.987	0.742	5.33609e-70	1.73064e-74	1.90917e-298
2	Slfn1	8.75423e-296	0.949809	0.995	0.761	2.69919e-291	1.45999e-187	2.71752	0.929	0.137	4.50159e-183	1.45999e-187	1.75085e-295
2	Oasl2	3.42873e-293	0.871347	0.995	0.839	1.05718e-288	7.84869e-103	2.4985	0.91	0.3	2.41999e-98	7.84869e-103	6.85747e-293
2	Fn1	1.38339e-244	1.24302	0.793	0.385	4.2654e-240	2.04772e-292	2.67673	0.768	0.054	6.31375e-288	1.38339e-244	4.09545e-292
2	AB124611	3.02077e-288	0.888188	0.98	0.684	9.31395e-284	1.23185e-235	2.13442	0.942	0.116	3.79815e-231	1.23185e-235	6.04155e-288
2	Lyn	1.12049e-286	0.871656	0.987	0.776	3.4548e-282	1.62488e-31	0.88914	0.961	0.659	5.00998e-27	1.62488e-31	2.24097e-286
2	Nfam1	1.51107e-286	0.901866	0.875	0.51	4.65907e-282	2.02856e-26	0.802031	0.826	0.474	6.25466e-22	2.02856e-26	3.02213e-286
2	Ms4a4c	1.41487e-285	0.934087	0.998	0.784	4.36246e-281	3.2863e-182	3.30063	0.968	0.177	1.01326e-177	3.2863e-182	2.82973e-285
2	Fcgr4	6.5038e-284	1.00551	0.969	0.623	2.00532e-279	5.18323e-124	2.28621	0.935	0.239	1.59815e-119	5.18323e-124	1.30076e-283
2	Tifab	3.53722e-280	0.957241	0.888	0.53	1.09063e-275	1.24195e-29	0.918904	0.819	0.454	3.82931e-25	1.24195e-29	7.07444e-280
2	Plbd1	2.11006e-97	0.384328	0.946	0.617	6.50594e-93	2.68838e-277	1.59135	0.794	0.057	8.28908e-273	2.11006e-97	5.37676e-277
2	Sirpb1b	5.64242e-126	0.494401	0.722	0.42	1.73973e-121	2.2881e-273	1.28145	0.658	0.04	7.05489e-269	5.64242e-126	4.57619e-273
2	Gbp3	5.08923e-268	0.927319	0.944	0.706	1.56916e-263	4.02241e-96	2.16305	0.877	0.292	1.24023e-91	4.02241e-96	1.01785e-267
2	Mefv	1.47535e-180	0.655475	0.627	0.296	4.54894e-176	8.10109e-267	1.22229	0.516	0.024	2.49781e-262	1.47535e-180	1.62022e-266
2	Ms4a6d	2.18665e-264	0.931431	0.979	0.661	6.7421e-260	1.27014e-110	2.56363	0.961	0.354	3.91623e-106	1.27014e-110	4.3733e-264
2	A330040F15Rik	1.18662e-263	1.26599	0.858	0.512	3.65871e-259	6.96605e-125	2.33692	0.8	0.15	2.14784e-120	6.96605e-125	2.37324e-263
2	Fam111a	5.12344e-263	0.968533	0.889	0.591	1.57971e-258	1.23233e-62	1.53287	0.929	0.44	3.79963e-58	1.23233e-62	1.02469e-262
2	Ifit2	7.71049e-258	1.23492	0.955	0.729	2.37738e-253	1.98569e-85	2.41179	0.884	0.302	6.12246e-81	1.98569e-85	1.5421e-257
2	Gm21188	1.64658e-206	0.686189	0.836	0.467	5.0769e-202	3.02135e-255	1.42451	0.703	0.051	9.31572e-251	1.64658e-206	6.0427e-255
2	Lgals3	9.39255e-202	0.596455	0.994	0.737	2.896e-197	8.08763e-255	2.37597	0.968	0.105	2.49366e-250	9.39255e-202	1.61753e-254
2	Actb	7.93324e-253	0.587798	1	1	2.44605e-248	2.99464e-54	1.03838	1	1	9.23336e-50	2.99464e-54	1.58665e-252
2	Cd300lf	1.19295e-249	0.862052	0.956	0.623	3.67821e-245	4.64189e-172	1.94595	0.89	0.133	1.43124e-167	4.64189e-172	2.38589e-249
2	Actr3	6.79237e-248	0.591309	1	0.99	2.09429e-243	1.19794e-84	1.72939	1	0.908	3.69362e-80	1.19794e-84	1.35847e-247
2	Trem1	6.38537e-46	0.334015	0.395	0.231	1.9688e-41	7.6542e-248	1.77031	0.471	0.022	2.36002e-243	6.38537e-46	1.53084e-247
2	Sppl2a	9.45058e-248	0.791868	0.989	0.877	2.9139e-243	7.34948e-54	1.48428	0.968	0.77	2.26606e-49	7.34948e-54	1.89012e-247
2	Daxx	1.25915e-247	0.870424	0.949	0.728	3.88235e-243	3.67377e-75	1.58717	0.845	0.301	1.13273e-70	3.67377e-75	2.51831e-247
2	Bach1	2.67162e-243	0.976113	0.927	0.671	8.2374e-239	2.94494e-13	0.61616	0.813	0.593	9.08012e-09	2.94494e-13	5.34324e-243
2	Tspo	2.37279e-240	0.763953	0.957	0.748	7.31601e-236	1.44031e-73	0.884661	0.587	0.124	4.44089e-69	1.44031e-73	4.74557e-240
2	Il18	1.78738e-236	0.738739	0.67	0.302	5.51104e-232	1.4614e-09	0.47782	0.574	0.387	4.50592e-05	1.4614e-09	3.57476e-236
2	Bst1	4.4329e-120	0.595473	0.595	0.32	1.3668e-115	4.74875e-234	1.06083	0.503	0.027	1.46418e-229	4.4329e-120	9.4975e-234
2	Ly6c2	1.06104e-134	0.695765	0.992	0.842	3.27152e-130	3.6987e-233	3.4713	0.935	0.108	1.14042e-228	1.06104e-134	7.39741e-233
2	Lgals9	1.59584e-232	0.785148	0.981	0.833	4.92044e-228	6.58858e-38	1.04842	0.929	0.575	2.03146e-33	6.58858e-38	3.19167e-232
2	Npc2	3.30394e-232	0.683948	1	0.95	1.0187e-227	4.28904e-72	1.65364	0.987	0.84	1.32244e-67	4.28904e-72	6.60788e-232
2	ENSMUSG00000120878	1.93499e-195	0.810793	0.841	0.463	5.96615e-191	8.86687e-232	2.20145	0.858	0.086	2.73392e-227	1.93499e-195	1.77337e-231
2	Tpd52	1.10813e-230	0.826359	0.964	0.769	3.41671e-226	1.37018e-40	1.27545	0.935	0.646	4.22468e-36	1.37018e-40	2.21627e-230
2	Slfn2	2.38536e-229	0.738424	0.987	0.83	7.35477e-225	5.22439e-79	1.6721	0.955	0.381	1.61084e-74	5.22439e-79	4.77071e-229
2	Hp	5.2081e-69	0.383949	0.451	0.237	1.60581e-64	2.54418e-229	1.4554	0.465	0.022	7.84448e-225	5.2081e-69	5.08837e-229
2	Parp14	1.82107e-228	0.800135	0.979	0.839	5.6149e-224	3.06203e-65	1.65526	0.903	0.404	9.44116e-61	3.06203e-65	3.64214e-228
2	Rasgrp4	7.35392e-222	0.672097	0.592	0.24	2.26743e-217	4.23996e-104	1.14013	0.632	0.102	1.30731e-99	4.23996e-104	1.47078e-221
2	Ctsc	1.31177e-219	0.863046	0.998	0.869	4.04459e-215	5.4286e-61	1.92511	0.968	0.69	1.6738e-56	5.4286e-61	2.62354e-219
2	Themis2	1.92636e-216	0.755667	0.969	0.704	5.93954e-212	5.51339e-68	1.52362	0.935	0.422	1.69994e-63	5.51339e-68	3.85272e-216
2	Gpx1	3.38823e-215	0.760307	0.986	0.821	1.04469e-210	6.94124e-55	1.36063	0.948	0.585	2.14019e-50	6.94124e-55	6.77645e-215
2	Smpdl3a	4.55556e-215	0.863984	0.862	0.554	1.40462e-210	1.65845e-88	1.61259	0.832	0.238	5.11349e-84	1.65845e-88	9.11113e-215
2	Tyrobp	6.74406e-215	0.612811	1	0.87	2.0794e-210	7.36826e-38	0.955171	1	0.696	2.27186e-33	7.36826e-38	1.34881e-214
2	Trim25	2.99094e-213	0.850577	0.962	0.805	9.22197e-209	6.01293e-87	1.97834	0.942	0.378	1.85397e-82	6.01293e-87	5.98188e-213
2	Gm9733	1.17671e-209	0.37997	0.237	0.035	3.62816e-205	6.09747e-213	0.540731	0.239	0.005	1.88003e-208	1.17671e-209	1.21949e-212
2	Zyx	1.04234e-212	1.00661	0.948	0.779	3.21384e-208	6.82289e-68	1.72048	0.942	0.482	2.1037e-63	6.82289e-68	2.08468e-212
2	Plekhf2	2.5862e-208	0.820986	0.88	0.632	7.97404e-204	1.1652e-55	1.43019	0.877	0.428	3.59267e-51	1.1652e-55	5.1724e-208
2	Capza2	4.45388e-208	0.587705	0.994	0.919	1.37326e-203	6.93932e-26	0.712304	0.981	0.841	2.1396e-21	6.93932e-26	8.90775e-208
2	Mx1	5.71422e-208	1.07976	0.847	0.539	1.76187e-203	2.61973e-102	1.80099	0.761	0.16	8.07743e-98	2.61973e-102	1.14284e-207
2	Gm2a	3.8447e-206	0.659905	0.991	0.809	1.18544e-201	2.69749e-29	0.819533	0.968	0.832	8.31717e-25	2.69749e-29	7.68941e-206
2	Ms4a6b	4.93454e-203	0.688828	0.991	0.816	1.52147e-198	2.58272e-97	2.06667	0.961	0.35	7.96331e-93	2.58272e-97	9.86908e-203
2	Arhgef37	7.01429e-202	0.490698	0.369	0.097	2.16272e-197	4.05057e-119	0.732247	0.374	0.03	1.24891e-114	4.05057e-119	1.40286e-201
2	Mndal	1.78091e-201	0.7579	0.993	0.849	5.49108e-197	1.78947e-170	2.64775	0.942	0.157	5.51746e-166	1.78947e-170	3.56182e-201
2	Mcl1	1.64012e-198	0.582281	1	0.971	5.05699e-194	1.19237e-42	1.06538	1	0.842	3.67642e-38	1.19237e-42	3.28024e-198
2	Hpse	9.59457e-170	0.645955	0.773	0.451	2.95829e-165	2.84679e-198	1.15403	0.619	0.051	8.77751e-194	9.59457e-170	5.69358e-198
2	Chmp4b	7.81228e-198	0.575426	0.994	0.948	2.40876e-193	1.57966e-29	0.85636	0.955	0.764	4.87056e-25	1.57966e-29	1.56246e-197
2	Adssl1	8.58661e-197	0.709721	0.667	0.338	2.64751e-192	7.67031e-68	0.954351	0.594	0.132	2.36499e-63	7.67031e-68	1.71732e-196
2	Sp100	1.90024e-196	0.64853	0.998	0.919	5.859e-192	3.40012e-94	2.43279	0.968	0.414	1.04836e-89	3.40012e-94	3.80048e-196
2	Crip1	2.79301e-196	0.658828	0.895	0.588	8.61169e-192	1.73462e-101	1.13556	0.594	0.089	5.34835e-97	1.73462e-101	5.58602e-196
2	Rap2c	8.80621e-196	0.758987	0.923	0.741	2.71522e-191	2.90973e-42	1.1635	0.916	0.54	8.97158e-38	2.90973e-42	1.76124e-195
2	Tor1aip1	2.51686e-195	0.6422	0.986	0.914	7.76024e-191	1.81756e-34	0.938821	0.955	0.842	5.60408e-30	1.81756e-34	5.03372e-195
2	H3f3a	2.97897e-193	0.504656	0.999	0.988	9.18504e-189	1.13775e-63	1.13156	1	0.96	3.50803e-59	1.13775e-63	5.95793e-193
2	Stat2	4.33553e-192	0.706457	0.974	0.833	1.33677e-187	1.21768e-56	1.58067	0.877	0.451	3.75448e-52	1.21768e-56	8.67107e-192
2	Ifi203	1.51875e-191	0.812937	0.981	0.821	4.68275e-187	7.44422e-160	2.52791	0.91	0.154	2.29528e-155	7.44422e-160	3.03749e-191
2	Prdx5	1.12357e-190	0.684857	0.998	0.889	3.46432e-186	3.01465e-82	2.35713	0.987	0.672	9.29507e-78	3.01465e-82	2.24715e-190
2	Snx10	3.56548e-188	0.691292	0.966	0.751	1.09934e-183	7.66512e-75	1.71306	0.981	0.554	2.36339e-70	7.66512e-75	7.13096e-188
2	Lamp2	4.73152e-188	0.627441	0.995	0.852	1.45887e-183	6.45896e-21	0.573734	0.987	0.901	1.99149e-16	6.45896e-21	9.46303e-188
2	Cdkn1a	1.12422e-187	0.80341	0.957	0.734	3.46632e-183	1.69994e-70	1.71146	0.942	0.423	5.24141e-66	1.69994e-70	2.24845e-187
2	Arpc2	5.08535e-187	0.445903	1	0.99	1.56797e-182	7.38328e-64	1.19039	1	0.911	2.27649e-59	7.38328e-64	1.01707e-186
2	Fgl2	8.54016e-187	0.724207	0.994	0.857	2.63319e-182	4.01155e-100	2.63131	0.923	0.305	1.23688e-95	4.01155e-100	1.70803e-186
2	Fxyd5	8.45274e-154	0.555296	0.993	0.847	2.60623e-149	9.0268e-186	2.39056	0.968	0.162	2.78323e-181	8.45274e-154	1.80536e-185
2	Oas2	1.10906e-184	0.643328	0.766	0.449	3.41957e-180	6.55913e-78	1.07985	0.652	0.139	2.02238e-73	6.55913e-78	2.21813e-184
2	Plaur	1.30624e-183	0.825778	0.882	0.551	4.02753e-179	3.30591e-76	1.88329	0.774	0.233	1.01931e-71	3.30591e-76	2.61248e-183
2	Actg1	2.68784e-182	0.620054	1	1	8.28742e-178	1.06507e-39	1.04218	1	0.99	3.28392e-35	1.06507e-39	5.37568e-182
2	Hk3	5.04395e-182	0.763363	0.847	0.524	1.5552e-177	6.49596e-51	1.20696	0.703	0.259	2.0029e-46	6.49596e-51	1.00879e-181
2	Ifi205	1.76582e-124	0.489292	0.831	0.52	5.44454e-120	1.09565e-181	1.6721	0.69	0.07	3.37821e-177	1.76582e-124	2.19129e-181
2	Trafd1	1.41966e-181	0.61705	0.965	0.815	4.37725e-177	2.69252e-52	1.28062	0.916	0.509	8.30184e-48	2.69252e-52	2.83933e-181
2	Gm5431	5.82371e-180	0.644761	0.841	0.505	1.79562e-175	3.54128e-123	1.49826	0.761	0.135	1.09188e-118	3.54128e-123	1.16474e-179
2	Ly6e	9.33305e-180	0.509366	1	0.973	2.87766e-175	4.06917e-68	1.6924	0.994	0.783	1.25465e-63	4.06917e-68	1.86661e-179
2	Kdm7a	1.62348e-179	0.771569	0.925	0.751	5.00567e-175	8.72085e-40	1.16144	0.897	0.588	2.6889e-35	8.72085e-40	3.24695e-179
2	Sp140	3.09921e-179	0.608239	0.974	0.804	9.55578e-175	4.47867e-91	1.74507	0.935	0.33	1.38091e-86	4.47867e-91	6.19841e-179
2	Zbp1	5.19523e-179	0.609916	0.987	0.833	1.60184e-174	3.94612e-121	1.8352	0.884	0.199	1.21671e-116	3.94612e-121	1.03905e-178
2	Csf2ra	6.01766e-179	0.658178	0.995	0.785	1.85542e-174	1.65756e-76	1.62346	0.994	0.569	5.11075e-72	1.65756e-76	1.20353e-178
2	Tnfrsf1a	2.79436e-178	0.621724	0.87	0.607	8.61585e-174	6.96762e-27	0.675251	0.761	0.411	2.14833e-22	6.96762e-27	5.58872e-178
2	Niban2	4.13499e-177	0.752689	0.643	0.333	1.27494e-172	1.22007e-53	0.700326	0.465	0.097	3.76184e-49	1.22007e-53	8.26999e-177
2	Plcg2	4.76545e-177	0.637793	0.882	0.616	1.46933e-172	2.49251e-26	0.680697	0.819	0.443	7.68516e-22	2.49251e-26	9.5309e-177
2	Msn	1.73396e-176	0.517086	0.995	0.945	5.34632e-172	2.36554e-62	1.29323	0.994	0.735	7.29368e-58	2.36554e-62	3.46792e-176
2	Lnpep	4.07014e-175	0.609045	0.978	0.922	1.25495e-170	2.50839e-53	1.17816	0.974	0.736	7.73413e-49	2.50839e-53	8.14028e-175
2	Cybb	2.43726e-149	0.629554	0.999	0.722	7.51481e-145	4.18441e-175	2.83238	0.987	0.176	1.29018e-170	2.43726e-149	8.36882e-175
2	Vim	9.01602e-175	0.953013	0.984	0.844	2.77991e-170	1.3868e-103	2.54229	0.968	0.298	4.27591e-99	1.3868e-103	1.8032e-174
2	Rnf213	2.71708e-174	0.59211	0.993	0.901	8.37759e-170	5.86451e-77	2.06625	0.942	0.449	1.8082e-72	5.86451e-77	5.43417e-174
2	Oas3	5.29738e-172	0.650577	0.876	0.588	1.63334e-167	4.02586e-164	1.61681	0.819	0.117	1.24129e-159	4.02586e-164	1.05948e-171
2	AI839979	9.99572e-129	0.311088	0.258	0.07	3.08198e-124	8.60443e-172	0.480593	0.265	0.009	2.653e-167	9.99572e-129	1.72089e-171
2	Cers6	1.15967e-171	0.765112	0.92	0.672	3.57561e-167	1.62401e-107	1.93145	0.884	0.234	5.00732e-103	1.62401e-107	2.31934e-171
2	Tiam1	2.01052e-171	0.602582	0.532	0.226	6.19905e-167	6.31079e-21	0.548512	0.458	0.178	1.94581e-16	6.31079e-21	4.02105e-171
2	Trim30b	1.20392e-170	0.55984	0.535	0.228	3.71204e-166	8.1787e-85	0.99031	0.535	0.09	2.52174e-80	8.1787e-85	2.40783e-170
2	F13a1	1.95892e-170	0.875472	0.522	0.206	6.03992e-166	1.4624e-85	1.28219	0.477	0.065	4.50902e-81	1.4624e-85	3.91783e-170
2	Parp12	2.04636e-170	0.618145	0.901	0.662	6.30954e-166	1.94877e-46	1.11506	0.787	0.355	6.00866e-42	1.94877e-46	4.09272e-170
2	Trim30c	4.27914e-170	0.55877	0.438	0.157	1.31939e-165	2.27921e-63	0.837806	0.426	0.072	7.02749e-59	2.27921e-63	8.55828e-170
2	Rtp4	2.5864e-168	0.617977	0.976	0.81	7.97465e-164	5.92226e-81	1.75748	0.91	0.347	1.82601e-76	5.92226e-81	5.1728e-168
2	H2-T23	4.30031e-168	0.499651	0.999	0.952	1.32591e-163	5.61544e-70	1.71531	0.961	0.507	1.73141e-65	5.61544e-70	8.60062e-168
2	Rassf4	9.19265e-168	0.735449	0.85	0.593	2.83437e-163	6.86168e-32	0.906542	0.813	0.448	2.11566e-27	6.86168e-32	1.83853e-167
2	Rbms1	2.89303e-167	0.692521	0.971	0.869	8.92007e-163	5.63852e-81	1.69996	0.994	0.525	1.73852e-76	5.63852e-81	5.78606e-167
2	Clec4a3	8.50093e-167	0.79039	0.654	0.342	2.62109e-162	5.60011e-21	0.912476	0.606	0.308	1.72668e-16	5.60011e-21	1.70019e-166
2	Serpinb10	3.21897e-166	0.308098	0.117	0.007	9.92505e-162	6.19834e-156	0.381573	0.129	0.001	1.91113e-151	6.19834e-156	6.43794e-166
2	H3f3b	4.98582e-166	0.591696	1	0.996	1.53728e-161	3.97557e-43	1.14145	1	0.955	1.22579e-38	3.97557e-43	9.97164e-166
2	Mgst1	1.08169e-164	0.587119	0.768	0.397	3.33516e-160	1.68872e-96	1.33868	0.832	0.166	5.20683e-92	1.68872e-96	2.16337e-164
2	Csf2rb	1.96305e-164	0.744393	0.984	0.72	6.05267e-160	7.2704e-77	1.90209	0.948	0.461	2.24168e-72	7.2704e-77	3.9261e-164
2	S100a11	1.97747e-164	0.691863	0.979	0.822	6.09714e-160	2.12266e-164	2.69326	0.948	0.168	6.54479e-160	2.12266e-164	3.95494e-164
2	Snx2	2.17721e-164	0.654697	0.909	0.724	6.713e-160	9.29236e-22	0.784316	0.871	0.609	2.86511e-17	9.29236e-22	4.35443e-164
2	Irgm1	4.47176e-164	0.608519	0.988	0.88	1.37878e-159	4.63909e-62	1.66231	0.935	0.484	1.43037e-57	4.63909e-62	8.94352e-164
2	Ifit3	5.49682e-164	0.872872	0.934	0.713	1.69484e-159	3.56354e-70	1.92343	0.865	0.316	1.09875e-65	3.56354e-70	1.09936e-163
2	Macroh2a1	4.42911e-162	0.539221	0.986	0.925	1.36563e-157	1.17681e-44	1.13136	0.955	0.724	3.62845e-40	1.17681e-44	8.85822e-162
2	Sdcbp	5.51837e-162	0.543502	0.998	0.91	1.70148e-157	1.29643e-52	1.1691	0.974	0.802	3.9973e-48	1.29643e-52	1.10367e-161
2	Mmp19	7.567e-162	0.818237	0.41	0.148	2.33313e-157	6.33478e-71	0.832171	0.303	0.033	1.9532e-66	6.33478e-71	1.5134e-161
2	Ifi213	3.35149e-161	0.737008	0.952	0.798	1.03337e-156	4.31547e-111	2.20048	0.839	0.192	1.33059e-106	4.31547e-111	6.70299e-161
2	Gyg	6.68603e-161	0.641241	0.846	0.607	2.0615e-156	8.37515e-46	1.35327	0.806	0.432	2.58231e-41	8.37515e-46	1.33721e-160
2	Picalm	8.88921e-161	0.558333	0.995	0.947	2.74081e-156	1.84591e-19	0.558229	1	0.903	5.69151e-15	1.84591e-19	1.77784e-160
2	Clec4a1	1.45528e-159	0.717034	0.614	0.296	4.48705e-155	1.77274e-69	1.2109	0.619	0.139	5.46588e-65	1.77274e-69	2.91055e-159
2	Dck	1.78842e-159	0.606159	0.806	0.525	5.51425e-155	1.9133e-84	1.3334	0.774	0.205	5.89926e-80	1.9133e-84	3.57685e-159
2	Gbp9	1.97321e-159	0.673325	0.845	0.606	6.084e-155	1.20874e-60	1.27709	0.697	0.215	3.7269e-56	1.20874e-60	3.94642e-159
2	Dtx3l	7.18697e-159	0.572285	0.983	0.882	2.21596e-154	1.24631e-69	1.70478	0.955	0.489	3.84275e-65	1.24631e-69	1.43739e-158
2	Pim1	9.51737e-159	0.601707	0.998	0.936	2.93449e-154	6.71381e-87	2.3541	0.987	0.506	2.07007e-82	6.71381e-87	1.90347e-158
2	Itga4	3.20861e-158	0.637664	0.956	0.759	9.89311e-154	1.0279e-158	2.0341	0.884	0.141	3.16933e-154	3.20861e-158	2.0558e-158
2	Rara	1.51463e-158	0.569329	0.6	0.3	4.67005e-154	2.66222e-38	0.326224	0.219	0.031	8.20841e-34	2.66222e-38	3.02925e-158
2	Oasl1	9.55106e-157	0.886458	0.859	0.601	2.94488e-152	1.74492e-106	1.85014	0.755	0.146	5.3801e-102	1.74492e-106	1.91021e-156
2	Slfn9	5.54895e-154	0.689138	0.687	0.39	1.71091e-149	2.08645e-76	1.33716	0.626	0.139	6.43314e-72	2.08645e-76	1.10979e-153
2	Cd52	5.82856e-153	0.454487	1	0.957	1.79712e-148	2.89663e-86	2.32567	1	0.604	8.93119e-82	2.89663e-86	1.16571e-152
2	Gpr35	1.49494e-152	0.62208	0.922	0.622	4.60934e-148	5.64874e-125	1.73122	0.832	0.166	1.74168e-120	5.64874e-125	2.98987e-152
2	Rsad2	2.517e-152	1.21357	0.857	0.628	7.76067e-148	1.22268e-116	2.81636	0.839	0.181	3.76988e-112	1.22268e-116	5.034e-152
2	Ifih1	6.9989e-152	0.694347	0.915	0.71	2.15797e-147	3.58721e-72	1.56268	0.858	0.298	1.10604e-67	3.58721e-72	1.39978e-151
2	Nfil3	9.73424e-129	0.597652	0.916	0.707	3.00136e-124	1.7464e-151	2.04597	0.91	0.178	5.38467e-147	9.73424e-129	3.49279e-151
2	Sirpb1a	6.28422e-95	0.375505	0.455	0.229	1.93761e-90	5.63967e-151	0.647811	0.387	0.025	1.73888e-146	6.28422e-95	1.12793e-150
2	Ptpro	1.67825e-150	0.609421	0.692	0.402	5.17456e-146	5.90263e-19	0.658149	0.645	0.365	1.81996e-14	5.90263e-19	3.35651e-150
2	Cfp	2.95964e-150	0.581123	0.532	0.239	9.12547e-146	5.30218e-79	0.905188	0.471	0.071	1.63482e-74	5.30218e-79	5.91929e-150
2	Emp3	3.49478e-150	0.651801	0.874	0.596	1.07754e-145	4.44507e-57	0.761997	0.51	0.111	1.37055e-52	4.44507e-57	6.98955e-150
2	Gbp7	8.28524e-150	0.711579	0.964	0.837	2.55459e-145	1.00531e-63	1.8127	0.955	0.546	3.09966e-59	1.00531e-63	1.65705e-149
2	Naaa	5.77059e-148	0.629523	0.851	0.561	1.77925e-143	8.54061e-18	0.761367	0.684	0.401	2.63333e-13	8.54061e-18	1.15412e-147
2	Acer3	6.38795e-148	0.618527	0.842	0.571	1.9696e-143	1.38467e-10	0.460537	0.742	0.508	4.26934e-06	1.38467e-10	1.27759e-147
2	Gm35853	1.39829e-147	0.363972	0.282	0.074	4.31134e-143	5.61087e-44	0.400099	0.206	0.024	1.73e-39	5.61087e-44	2.79658e-147
2	Il1rn	3.29874e-82	0.433354	0.817	0.547	1.0171e-77	5.00725e-147	1.65012	0.677	0.081	1.54389e-142	3.29874e-82	1.00145e-146
2	Irf2	6.65965e-147	0.559547	0.986	0.902	2.05337e-142	1.57353e-56	1.31624	0.987	0.722	4.85166e-52	1.57353e-56	1.33193e-146
2	Anxa2	2.78121e-146	0.686967	0.877	0.647	8.5753e-142	8.24483e-122	1.83134	0.787	0.148	2.54213e-117	8.24483e-122	5.56242e-146
2	9930111J21Rik2	5.91428e-145	0.573546	0.962	0.812	1.82355e-140	3.52655e-31	0.961222	0.877	0.557	1.08734e-26	3.52655e-31	1.18286e-144
2	Plod3	4.17205e-141	0.599507	0.638	0.374	1.28637e-136	6.26188e-12	0.519457	0.542	0.339	1.93073e-07	6.26188e-12	8.3441e-141
2	Atp6v1b2	8.37135e-140	0.53935	0.955	0.791	2.58114e-135	5.29676e-27	0.803727	0.89	0.665	1.63315e-22	5.29676e-27	1.67427e-139
2	Trim30a	8.17855e-138	0.513002	0.992	0.931	2.52169e-133	3.03341e-65	1.69538	0.974	0.641	9.35291e-61	3.03341e-65	1.63571e-137
2	Flna	8.79004e-138	0.645231	0.879	0.692	2.71023e-133	3.71552e-54	1.33027	0.826	0.36	1.14561e-49	3.71552e-54	1.75801e-137
2	Cmtm7	9.64698e-138	0.586005	0.9	0.692	2.97445e-133	1.65608e-28	0.763474	0.794	0.43	5.1062e-24	1.65608e-28	1.9294e-137
2	Rnpep	3.32187e-137	0.54847	0.78	0.527	1.02423e-132	3.63183e-14	0.554153	0.561	0.314	1.1198e-09	3.63183e-14	6.64375e-137
2	Cmpk2	7.24802e-137	0.890076	0.626	0.345	2.23478e-132	1.39259e-67	1.64226	0.639	0.157	4.29376e-63	1.39259e-67	1.4496e-136
2	Tor3a	2.64515e-136	0.601617	0.846	0.609	8.15579e-132	4.80033e-33	0.818048	0.761	0.341	1.48008e-28	4.80033e-33	5.2903e-136
2	Arpc1b	3.32439e-135	0.406016	0.999	0.966	1.02501e-130	1.00069e-55	1.137	0.994	0.736	3.08543e-51	1.00069e-55	6.64878e-135
2	Rhog	4.48351e-135	0.442441	0.997	0.944	1.3824e-130	2.92011e-46	1.00993	0.994	0.807	9.00356e-42	2.92011e-46	8.96702e-135
2	Irf5	7.54046e-135	0.534294	0.896	0.653	2.32495e-130	1.95439e-13	0.489644	0.735	0.471	6.02597e-09	1.95439e-13	1.50809e-134
2	Gm5150	4.5487e-125	0.329294	0.26	0.072	1.4025e-120	1.3597e-134	0.407206	0.219	0.008	4.19236e-130	4.5487e-125	2.7194e-134
2	Lilrb4b	1.22176e-74	0.424142	0.874	0.673	3.76706e-70	6.23005e-133	1.63085	0.865	0.157	1.92091e-128	1.22176e-74	1.24601e-132
2	Lst1	9.94414e-133	0.519701	0.849	0.548	3.06608e-128	5.35409e-63	1.15587	0.781	0.256	1.65083e-58	5.35409e-63	1.98883e-132
2	Trex1	1.31279e-132	0.52668	0.905	0.678	4.04771e-128	1.52306e-32	0.86064	0.652	0.276	4.69605e-28	1.52306e-32	2.62557e-132
2	Aldh2	1.81517e-132	0.532969	0.653	0.378	5.5967e-128	1.54318e-08	0.479174	0.626	0.451	0.000475809	1.54318e-08	3.63033e-132
2	Mcub	3.3724e-120	0.448857	0.445	0.203	1.03981e-115	1.98108e-132	0.703645	0.394	0.03	6.10825e-128	3.3724e-120	3.96215e-132
2	Pkm	3.14221e-132	0.504431	0.996	0.915	9.68837e-128	5.45247e-59	1.45351	0.968	0.689	1.68116e-54	5.45247e-59	6.28441e-132
2	Ccl2	3.80904e-132	0.920636	0.659	0.367	1.17444e-127	7.73385e-08	0.497633	0.49	0.296	0.00238458	7.73385e-08	7.61808e-132
2	Isg15	6.43899e-132	0.677984	0.947	0.768	1.98533e-127	3.00018e-109	2.26875	0.89	0.228	9.25046e-105	3.00018e-109	1.2878e-131
2	Fam241a	1.87648e-131	0.595081	0.722	0.461	5.78574e-127	2.82589e-66	1.08509	0.619	0.152	8.71307e-62	2.82589e-66	3.75295e-131
2	Hacd4	6.23038e-131	0.506022	0.519	0.243	1.92101e-126	7.45761e-09	0.540036	0.419	0.246	0.00022994	7.45761e-09	1.24608e-130
2	Phf11b	4.71619e-130	0.591724	0.955	0.805	1.45414e-125	1.73584e-88	1.89907	0.897	0.291	5.35212e-84	1.73584e-88	9.43238e-130
2	Sdc3	5.19826e-129	0.546537	0.956	0.75	1.60278e-124	1.45121e-14	0.30847	0.832	0.547	4.47453e-10	1.45121e-14	1.03965e-128
2	Gpat3	9.14955e-128	0.411044	0.216	0.05	2.82108e-123	3.56925e-117	0.477682	0.206	0.008	1.10051e-112	3.56925e-117	1.82991e-127
2	Irf7	4.68014e-126	0.603032	0.971	0.805	1.44303e-121	1.64332e-116	1.89187	0.871	0.198	5.06685e-112	1.64332e-116	9.36029e-126
2	Rab5c	2.83741e-125	0.469646	0.983	0.901	8.74858e-121	1.52013e-30	0.872293	0.923	0.736	4.68701e-26	1.52013e-30	5.67482e-125
2	Cd47	7.39116e-125	0.436751	0.998	0.976	2.27892e-120	7.3556e-70	1.62194	0.981	0.842	2.26795e-65	7.3556e-70	1.47823e-124
2	Pirb	4.91737e-111	0.503259	0.872	0.6	1.51617e-106	9.8949e-125	1.29964	0.723	0.119	3.05089e-120	4.91737e-111	1.97898e-124
2	Tmpo	1.92985e-124	0.661195	0.835	0.668	5.95031e-120	9.40063e-36	1.20038	0.865	0.561	2.8985e-31	9.40063e-36	3.8597e-124
2	Pid1	2.87609e-124	0.658995	0.783	0.522	8.86783e-120	1.8035e-19	0.806941	0.716	0.436	5.56074e-15	1.8035e-19	5.75217e-124
2	Igsf6	3.1518e-124	0.510576	0.836	0.522	9.71795e-120	2.21726e-82	1.3993	0.832	0.255	6.83648e-78	2.21726e-82	6.3036e-124
2	Slc16a3	2.1126e-67	0.408041	0.584	0.372	6.51378e-63	5.80538e-124	1.17111	0.606	0.083	1.78997e-119	2.1126e-67	1.16108e-123
2	Il10ra	1.5402e-123	0.519866	0.97	0.8	4.7489e-119	1.20881e-10	0.449894	0.884	0.605	3.72713e-06	1.20881e-10	3.0804e-123
2	Calhm6	6.41625e-83	0.454858	0.867	0.623	1.97832e-78	2.47744e-123	1.92736	0.755	0.133	7.63871e-119	6.41625e-83	4.95489e-123
2	Marchf5	3.43472e-122	0.592938	0.864	0.684	1.05903e-117	2.1331e-41	1.01142	0.813	0.417	6.57698e-37	2.1331e-41	6.86943e-122
2	Ifi206	3.06291e-121	0.5907	0.91	0.722	9.44386e-117	5.87855e-100	1.86001	0.832	0.196	1.81253e-95	5.87855e-100	6.12581e-121
2	Nr4a1	1.2565e-120	0.742927	0.912	0.786	3.87417e-116	5.82219e-18	0.730458	0.942	0.663	1.79516e-13	5.82219e-18	2.513e-120
2	Pgd	1.43862e-120	0.531509	0.857	0.648	4.43569e-116	9.52926e-31	0.948789	0.787	0.448	2.93816e-26	9.52926e-31	2.87724e-120
2	Ptpn1	1.63067e-120	0.590225	0.968	0.858	5.02784e-116	2.71331e-16	0.709153	0.877	0.674	8.36596e-12	2.71331e-16	3.26134e-120
2	Cxcl10	1.71829e-120	1.66374	0.786	0.615	5.298e-116	8.62544e-53	3.11619	0.665	0.212	2.65948e-48	8.62544e-53	3.43657e-120
2	Tmem50b	8.11537e-120	0.552031	0.816	0.604	2.50221e-115	2.53048e-31	0.921755	0.806	0.47	7.80224e-27	2.53048e-31	1.62307e-119
2	Fndc3a	8.78194e-120	0.653005	0.853	0.687	2.70773e-115	2.30619e-21	0.875381	0.768	0.492	7.11069e-17	2.30619e-21	1.75639e-119
2	Nampt	1.76533e-119	0.539808	0.986	0.866	5.44304e-115	5.35404e-68	1.97189	0.916	0.5	1.65081e-63	5.35404e-68	3.53066e-119
2	Mxd1	1.76757e-119	0.8016	0.889	0.738	5.44996e-115	3.78683e-91	2.84264	0.852	0.274	1.16759e-86	3.78683e-91	3.53515e-119
2	B430306N03Rik	1.81115e-118	0.436952	0.479	0.23	5.58432e-114	6.63132e-34	0.57629	0.406	0.108	2.04463e-29	6.63132e-34	3.6223e-118
2	Arpc5	3.4966e-118	0.377622	0.999	0.977	1.07811e-113	2.14271e-60	1.23191	1	0.868	6.60662e-56	2.14271e-60	6.9932e-118
2	Stx7	9.60527e-118	0.490579	0.963	0.811	2.96159e-113	1.26775e-20	0.574762	0.955	0.772	3.90884e-16	1.26775e-20	1.92105e-117
2	Slfn8	9.95977e-118	0.535679	0.917	0.754	3.0709e-113	9.0951e-47	1.13896	0.832	0.372	2.80429e-42	9.0951e-47	1.99195e-117
2	Tgfbi	6.79426e-77	0.417038	0.99	0.709	2.09487e-72	1.20819e-117	2.71445	0.994	0.321	3.72522e-113	6.79426e-77	2.41639e-117
2	Atp1a3	3.4179e-117	0.613965	0.669	0.402	1.05384e-112	5.69347e-15	0.408542	0.516	0.249	1.75547e-10	5.69347e-15	6.8358e-117
2	Tarm1	5.81333e-68	0.37807	0.301	0.134	1.79242e-63	3.77738e-117	0.555135	0.265	0.014	1.16468e-112	5.81333e-68	7.55475e-117
2	Oas1a	5.18655e-117	0.529659	0.762	0.53	1.59917e-112	1.19712e-28	0.474871	0.387	0.112	3.69107e-24	1.19712e-28	1.03731e-116
2	Diaph1	1.32054e-116	0.593737	0.924	0.805	4.07161e-112	2.85435e-63	1.49695	0.845	0.363	8.80082e-59	2.85435e-63	2.64107e-116
2	Ahnak	3.78261e-116	0.619861	0.892	0.656	1.16629e-111	5.91072e-89	1.57128	0.89	0.234	1.82245e-84	5.91072e-89	7.56522e-116
2	Cd44	2.04532e-102	0.755418	0.862	0.67	6.30633e-98	6.44773e-116	1.74608	0.781	0.15	1.98803e-111	2.04532e-102	1.28955e-115
2	Mlkl	3.84164e-107	0.440275	0.502	0.26	1.18449e-102	1.1596e-115	0.785185	0.452	0.046	3.57539e-111	3.84164e-107	2.31919e-115
2	Sting1	5.77027e-114	0.527821	0.882	0.69	1.77915e-109	1.73174e-14	0.569083	0.806	0.522	5.33948e-10	1.73174e-14	1.15405e-113
2	Itga5	6.06895e-114	0.58157	0.726	0.465	1.87124e-109	2.56036e-39	0.924764	0.581	0.188	7.89436e-35	2.56036e-39	1.21379e-113
2	C130050O18Rik	2.83594e-113	0.305883	0.271	0.085	8.74405e-109	2.73148e-18	0.355483	0.161	0.033	8.42196e-14	2.73148e-18	5.67188e-113
2	Pik3cd	3.51209e-113	0.468636	0.904	0.752	1.08288e-108	2.05622e-23	0.730885	0.794	0.488	6.33994e-19	2.05622e-23	7.02419e-113
2	Tmem131	3.80057e-113	0.440008	0.823	0.594	1.17183e-108	5.51854e-22	0.750722	0.703	0.405	1.70153e-17	5.51854e-22	7.60115e-113
2	Nt5c3	4.15563e-113	0.614721	0.837	0.649	1.28131e-108	1.1522e-70	1.75695	0.865	0.341	3.55258e-66	1.1522e-70	8.31127e-113
2	Myd88	1.81806e-112	0.535613	0.788	0.583	5.60562e-108	4.4213e-17	0.558098	0.677	0.394	1.36322e-12	4.4213e-17	3.63612e-112
2	Dok3	4.73881e-111	0.44325	0.552	0.301	1.46112e-106	2.07401e-20	0.429547	0.316	0.099	6.39479e-16	2.07401e-20	9.47762e-111
2	Ifi27l2a	7.97628e-111	0.547313	0.945	0.814	2.45933e-106	2.511e-62	1.50056	0.852	0.303	7.74217e-58	2.511e-62	1.59526e-110
2	Il13ra1	3.39172e-110	0.486793	0.696	0.444	1.04577e-105	6.55678e-22	0.680154	0.632	0.326	2.02165e-17	6.55678e-22	6.78345e-110
2	Jarid2	4.23816e-110	0.571107	0.757	0.542	1.30675e-105	1.06123e-33	0.914219	0.684	0.306	3.27209e-29	1.06123e-33	8.47631e-110
2	Irf1	8.28171e-110	0.587839	0.981	0.919	2.5535e-105	1.22462e-20	0.960533	0.871	0.629	3.77586e-16	1.22462e-20	1.65634e-109
2	Irf2bp2	2.42883e-109	0.461096	0.981	0.871	7.4888e-105	2.20118e-29	0.778528	0.961	0.882	6.78691e-25	2.20118e-29	4.85765e-109
2	Ankle2	3.24687e-109	0.51963	0.784	0.581	1.00111e-104	6.31722e-16	0.598098	0.735	0.535	1.94779e-11	6.31722e-16	6.49374e-109
2	Stom	1.73713e-108	0.48281	0.477	0.244	5.35609e-104	3.73909e-49	0.859973	0.561	0.154	1.15287e-44	3.73909e-49	3.47426e-108
2	Usp18	3.74856e-108	0.609323	0.825	0.625	1.15579e-103	6.32829e-76	1.44909	0.755	0.199	1.9512e-71	6.32829e-76	7.49712e-108
2	Dpy19l1	3.9241e-108	0.536401	0.791	0.581	1.20992e-103	5.09103e-06	0.417371	0.697	0.597	0.156972	5.09103e-06	7.8482e-108
2	Ist1	1.54224e-107	0.483424	0.91	0.783	4.7552e-103	5.13409e-34	0.924482	0.865	0.557	1.58299e-29	5.13409e-34	3.08449e-107
2	Adgre5	6.09539e-105	0.496785	0.718	0.451	1.87939e-100	1.92981e-107	0.842741	0.465	0.051	5.95017e-103	6.09539e-105	3.85961e-107
2	Gnai2	4.77597e-107	0.336192	0.999	0.985	1.47258e-102	1.51155e-10	0.435797	0.968	0.883	4.66057e-06	1.51155e-10	9.55194e-107
2	Napsa	1.33607e-73	0.31267	0.578	0.353	4.11951e-69	6.68118e-107	0.413442	0.31	0.022	2.06001e-102	1.33607e-73	1.33624e-106
2	Fosl2	6.73027e-107	0.5557	0.925	0.775	2.07514e-102	8.91327e-73	1.84824	0.955	0.464	2.74823e-68	8.91327e-73	1.34605e-106
2	H2-DMa	2.0435e-106	0.523715	0.935	0.702	6.30072e-102	2.38194e-39	1.01756	0.71	0.299	7.34425e-35	2.38194e-39	4.087e-106
2	Abcg1	1.02099e-105	0.571238	0.899	0.736	3.148e-101	1.12469e-24	0.836437	0.781	0.454	3.46777e-20	1.12469e-24	2.04197e-105
2	Lrrc25	1.23776e-104	0.437747	0.618	0.378	3.81639e-100	1.43722e-16	0.350654	0.368	0.142	4.4314e-12	1.43722e-16	2.47553e-104
2	Anxa1	9.44177e-45	0.311276	0.335	0.186	2.91118e-40	2.96362e-104	1.107	0.387	0.036	9.13773e-100	9.44177e-45	5.92724e-104
2	Neurl3	3.20755e-104	0.493178	0.966	0.82	9.88984e-100	6.9013e-53	1.2991	0.942	0.477	2.12788e-48	6.9013e-53	6.4151e-104
2	Eif2ak2	3.65074e-104	0.52852	0.877	0.716	1.12563e-99	1.94334e-37	1.07143	0.819	0.411	5.9919e-33	1.94334e-37	7.30148e-104
2	Slc15a3	7.78222e-104	0.482913	0.93	0.67	2.39949e-99	9.53514e-39	0.977667	0.852	0.435	2.93997e-34	9.53514e-39	1.55644e-103
2	Stat1	1.68811e-102	0.455372	0.994	0.94	5.20496e-98	1.63723e-80	2.1684	0.935	0.427	5.04806e-76	1.63723e-80	3.37623e-102
2	Stx11	6.41347e-91	0.460295	0.633	0.399	1.97747e-86	3.97008e-102	0.87083	0.529	0.07	1.22409e-97	6.41347e-91	7.94016e-102
2	Plin2	6.99056e-102	0.572279	0.849	0.607	2.1554e-97	2.14004e-77	1.40777	0.748	0.2	6.59838e-73	2.14004e-77	1.39811e-101
2	Gm46224	9.59831e-102	0.388771	0.475	0.242	2.95945e-97	6.37133e-23	0.538305	0.394	0.132	1.96447e-18	6.37133e-23	1.91966e-101
2	Rps9	1.30784e-101	0.325739	0.999	0.998	4.03246e-97	2.79856e-55	1.02995	1	0.979	8.62879e-51	2.79856e-55	2.61568e-101
2	Sgk3	2.83467e-101	0.468376	0.762	0.537	8.74014e-97	2.45569e-28	0.794346	0.774	0.421	7.57163e-24	2.45569e-28	5.66934e-101
2	Prkx	3.9946e-101	0.64833	0.689	0.494	1.23166e-96	6.46089e-24	0.852651	0.684	0.374	1.99209e-19	6.46089e-24	7.98921e-101
2	Trib1	7.76365e-101	0.547107	0.854	0.632	2.39377e-96	2.17276e-34	1.04314	0.877	0.476	6.69927e-30	2.17276e-34	1.55273e-100
2	E2f2	1.66943e-100	0.437541	0.473	0.243	5.14737e-96	1.92835e-80	0.711973	0.394	0.05	5.94568e-76	1.92835e-80	3.33887e-100
2	Itgb7	2.05982e-100	0.458589	0.77	0.513	6.35105e-96	1.54583e-80	0.831568	0.477	0.07	4.76626e-76	1.54583e-80	4.11964e-100
2	Znfx1	2.15033e-100	0.516	0.887	0.719	6.63011e-96	1.56577e-33	1.0689	0.774	0.429	4.82774e-29	1.56577e-33	4.30066e-100
2	Tm6sf1	3.62424e-100	0.508691	0.738	0.501	1.11746e-95	3.9666e-08	0.311512	0.606	0.405	0.00122302	3.9666e-08	7.24848e-100
2	Sp110	4.91347e-100	0.422553	0.984	0.899	1.51497e-95	1.01075e-73	1.67253	0.981	0.511	3.11644e-69	1.01075e-73	9.82695e-100
2	Isg20	3.74569e-59	0.399884	0.813	0.637	1.15491e-54	2.86234e-99	1.56179	0.735	0.151	8.82547e-95	3.74569e-59	5.72469e-99
2	Msr1	3.71557e-99	0.524128	0.749	0.456	1.14562e-94	1.74172e-80	1.17769	0.581	0.104	5.37024e-76	1.74172e-80	7.43114e-99
2	Gbp5	5.73785e-99	0.640327	0.85	0.653	1.76915e-94	3.40416e-50	1.52168	0.748	0.29	1.0496e-45	3.40416e-50	1.14757e-98
2	Vdr	4.59455e-63	0.353931	0.456	0.26	1.41664e-58	1.05461e-98	0.610554	0.297	0.022	3.25168e-94	4.59455e-63	2.10922e-98
2	Irgm2	1.37088e-98	0.479497	0.92	0.768	4.22684e-94	3.17614e-39	1.22158	0.819	0.442	9.79301e-35	3.17614e-39	2.74177e-98
2	Gbp4	2.55534e-68	0.509878	0.861	0.726	7.87887e-64	3.55597e-98	1.74519	0.735	0.155	1.09641e-93	2.55534e-68	7.11193e-98
2	Arl4c	4.13256e-98	0.571376	0.934	0.801	1.27419e-93	6.7608e-24	0.82635	0.91	0.669	2.08456e-19	6.7608e-24	8.26513e-98
2	Ucp2	1.76341e-96	0.424219	0.999	0.952	5.43712e-92	6.80836e-25	0.785299	1	0.732	2.09922e-20	6.80836e-25	3.52682e-96
2	Gm12185	3.82868e-96	0.446102	0.952	0.794	1.1805e-91	1.37691e-32	0.914172	0.884	0.504	4.24542e-28	1.37691e-32	7.65736e-96
2	Ifi208	1.26735e-72	0.409511	0.739	0.523	3.90762e-68	5.47282e-96	1.20379	0.652	0.111	1.68743e-91	1.26735e-72	1.09456e-95
2	Scpep1	3.38997e-95	0.424145	0.953	0.747	1.04523e-90	5.08728e-26	0.743906	0.884	0.593	1.56856e-21	5.08728e-26	6.77994e-95
2	Actr2	8.24921e-95	0.358737	0.994	0.961	2.54348e-90	1.88497e-45	0.975462	0.987	0.833	5.81193e-41	1.88497e-45	1.64984e-94
2	Fem1c	1.04995e-94	0.536941	0.794	0.614	3.23732e-90	1.83798e-21	0.845971	0.677	0.395	5.66704e-17	1.83798e-21	2.0999e-94
2	Apobec1	9.04708e-94	0.445981	0.936	0.684	2.78948e-89	1.79789e-46	1.21385	0.826	0.383	5.54343e-42	1.79789e-46	1.80942e-93
2	Nrros	2.48554e-93	0.470046	0.917	0.737	7.66366e-89	9.05057e-08	0.329775	0.813	0.606	0.00279056	9.05057e-08	4.97108e-93
2	Phf11d	2.71789e-93	0.533104	0.77	0.544	8.38008e-89	1.93551e-62	1.26958	0.665	0.182	5.96777e-58	1.93551e-62	5.43579e-93
2	S100a10	2.84064e-93	0.467051	0.756	0.512	8.75856e-89	2.63698e-86	1.391	0.781	0.187	8.13061e-82	2.63698e-86	5.68129e-93
2	Osbpl9	3.08416e-93	0.455741	0.814	0.638	9.5094e-89	5.18236e-18	0.635762	0.768	0.519	1.59788e-13	5.18236e-18	6.16833e-93
2	Rgs2	1.05924e-92	0.636415	0.941	0.831	3.26595e-88	4.43725e-17	0.732611	0.929	0.663	1.36814e-12	4.43725e-17	2.11848e-92
2	Tent5a	2.20343e-92	0.510573	0.879	0.667	6.79382e-88	1.43542e-16	0.592938	0.826	0.516	4.42583e-12	1.43542e-16	4.40685e-92
2	Slk	2.42991e-92	0.518437	0.88	0.761	7.49213e-88	4.80689e-22	0.820636	0.826	0.566	1.48211e-17	4.80689e-22	4.85981e-92
2	Mx2	4.8651e-92	0.492594	0.579	0.342	1.50006e-87	8.48461e-32	0.689974	0.477	0.15	2.61606e-27	8.48461e-32	9.73021e-92
2	Igtp	6.85858e-92	0.441683	0.939	0.808	2.11471e-87	2.29426e-63	1.44628	0.826	0.306	7.0739e-59	2.29426e-63	1.37172e-91
2	Hck	1.12456e-91	0.449872	0.955	0.705	3.46736e-87	1.63272e-24	0.8263	0.852	0.514	5.03418e-20	1.63272e-24	2.24912e-91
2	Ncf4	2.20056e-91	0.436353	0.657	0.436	6.78499e-87	1.27629e-46	0.728354	0.516	0.138	3.93519e-42	1.27629e-46	4.40112e-91
2	Notch2	2.94951e-91	0.478197	0.807	0.638	9.09421e-87	1.15528e-16	0.602344	0.761	0.52	3.56207e-12	1.15528e-16	5.89901e-91
2	Myof	6.28877e-74	0.428938	0.681	0.445	1.93902e-69	3.43825e-91	0.983899	0.49	0.066	1.06012e-86	6.28877e-74	6.8765e-91
2	Tapbp	5.12474e-91	0.341456	0.999	0.975	1.58011e-86	2.47183e-63	1.57317	0.987	0.798	7.6214e-59	2.47183e-63	1.02495e-90
2	Prkcd	8.53189e-90	0.551811	0.961	0.798	2.63064e-85	8.94203e-27	1.09193	0.916	0.67	2.7571e-22	8.94203e-27	1.70638e-89
2	Capg	9.98796e-90	0.445865	0.788	0.517	3.07959e-85	8.95465e-53	0.96085	0.594	0.161	2.76099e-48	8.95465e-53	1.99759e-89
2	Tcirg1	1.0775e-89	0.413359	0.92	0.73	3.32225e-85	1.11404e-23	0.73058	0.723	0.411	3.43492e-19	1.11404e-23	2.155e-89
2	Ifit1	1.43206e-89	0.709614	0.821	0.641	4.41548e-85	3.21097e-89	2.15291	0.839	0.226	9.90039e-85	3.21097e-89	2.86412e-89
2	Nod2	1.80765e-89	0.402255	0.49	0.266	5.57354e-85	3.83087e-70	0.667162	0.387	0.055	1.18117e-65	3.83087e-70	3.61531e-89
2	Casp8	2.42914e-89	0.414128	0.907	0.759	7.48976e-85	9.4147e-32	0.917528	0.858	0.52	2.90284e-27	9.4147e-32	4.85828e-89
2	Stx3	2.80214e-89	0.387916	0.465	0.246	8.63984e-85	2.05179e-38	0.55608	0.323	0.064	6.32628e-34	2.05179e-38	5.60428e-89
2	Macir	1.62637e-88	0.409014	0.62	0.403	5.01458e-84	4.44773e-06	0.327507	0.568	0.41	0.137137	4.44773e-06	3.25274e-88
2	Furin	1.90625e-88	0.402356	0.814	0.611	5.87755e-84	5.60984e-40	0.870987	0.819	0.402	1.72968e-35	5.60984e-40	3.81251e-88
2	Atp1a1	7.1056e-88	0.489946	0.867	0.737	2.19087e-83	6.51854e-05	0.310282	0.426	0.311	1	6.51854e-05	1.42112e-87
2	Olfr56	8.89867e-88	0.391656	0.422	0.213	2.74373e-83	2.28673e-80	0.770829	0.419	0.057	7.05067e-76	2.28673e-80	1.77973e-87
2	Sh3bgrl	3.03692e-87	0.430709	0.848	0.669	9.36373e-83	2.33487e-43	1.02572	0.806	0.353	7.19911e-39	2.33487e-43	6.07384e-87
2	Slc31a1	1.34536e-84	0.455364	0.764	0.549	4.14814e-80	8.18784e-19	0.794713	0.645	0.373	2.52456e-14	8.18784e-19	2.69071e-84
2	Trim30d	2.60167e-84	0.406388	0.95	0.807	8.02171e-80	9.2095e-50	1.22025	0.916	0.487	2.83957e-45	9.2095e-50	5.20333e-84
2	Skap2	2.254e-83	0.403421	0.942	0.762	6.94975e-79	1.01981e-16	0.611598	0.858	0.604	3.14437e-12	1.01981e-16	4.50799e-83
2	Esd	3.12141e-83	0.434004	0.831	0.669	9.62423e-79	3.98619e-40	1.09778	0.761	0.392	1.22906e-35	3.98619e-40	6.24281e-83
2	Sem1	8.28877e-83	0.383278	0.945	0.834	2.55568e-78	7.27216e-46	1.11587	0.916	0.602	2.24223e-41	7.27216e-46	1.65775e-82
2	Tifa	8.4678e-83	0.471261	0.772	0.564	2.61088e-78	2.79423e-09	0.504377	0.613	0.435	8.61546e-05	2.79423e-09	1.69356e-82
2	Tgtp2	1.30503e-82	0.469774	0.847	0.657	4.0238e-78	6.28951e-69	1.10837	0.69	0.169	1.93924e-64	6.28951e-69	2.61006e-82
2	Taok3	3.73672e-82	0.459367	0.888	0.766	1.15214e-77	4.61746e-20	0.757828	0.845	0.614	1.4237e-15	4.61746e-20	7.47343e-82
2	Il1b	6.31664e-54	0.418815	0.93	0.771	1.94761e-49	4.43301e-82	2.70959	0.903	0.324	1.36683e-77	6.31664e-54	8.86602e-82
2	Vcpip1	4.62494e-82	0.451413	0.842	0.699	1.42601e-77	6.22205e-18	0.683413	0.781	0.564	1.91844e-13	6.22205e-18	9.24988e-82
2	Hsd17b11	7.24239e-81	0.415648	0.819	0.631	2.23305e-76	4.95776e-06	0.315039	0.845	0.701	0.152863	4.95776e-06	1.44848e-80
2	Slc8b1	9.84775e-81	0.445892	0.606	0.4	3.03636e-76	2.49268e-08	0.419572	0.361	0.202	0.000768568	2.49268e-08	1.96955e-80
2	Rnase6	1.09085e-80	0.35073	0.565	0.335	3.36341e-76	1.08085e-11	0.363856	0.342	0.152	3.33257e-07	1.08085e-11	2.18169e-80
2	Il15	1.73735e-80	0.444563	0.382	0.186	5.35676e-76	8.74172e-10	0.471125	0.316	0.15	2.69534e-05	8.74172e-10	3.4747e-80
2	Rab1a	2.10405e-79	0.370628	0.955	0.864	6.48741e-75	1.34103e-10	0.365776	0.968	0.88	4.13479e-06	1.34103e-10	4.2081e-79
2	Dleu2	5.06706e-79	0.523131	0.768	0.566	1.56233e-74	2.45331e-07	0.379208	0.69	0.535	0.00756429	2.45331e-07	1.01341e-78
2	Camk2d	6.29095e-79	0.477427	0.748	0.558	1.93969e-74	1.63824e-13	0.491431	0.755	0.5	5.05118e-09	1.63824e-13	1.25819e-78
2	Lpar6	8.74857e-79	0.517806	0.731	0.516	2.69745e-74	1.32662e-09	0.45093	0.69	0.472	4.09037e-05	1.32662e-09	1.74971e-78
2	Tmem67	9.20218e-79	0.338308	0.395	0.2	2.83731e-74	2.82987e-37	0.558282	0.374	0.087	8.72535e-33	2.82987e-37	1.84044e-78
2	Dhx58	1.8076e-78	0.391617	0.768	0.557	5.57336e-74	2.4123e-63	0.920967	0.671	0.174	7.43785e-59	2.4123e-63	3.61519e-78
2	Stard3	4.42367e-78	0.385054	0.704	0.506	1.36395e-73	2.98069e-07	0.38798	0.606	0.433	0.00919035	2.98069e-07	8.84735e-78
2	Tnfaip2	1.07865e-56	0.367357	0.79	0.562	3.3258e-52	6.06445e-78	1.73146	0.787	0.219	1.86985e-73	1.07865e-56	1.21289e-77
2	Klf13	1.01218e-77	0.404806	0.899	0.783	3.12085e-73	4.09178e-22	0.75012	0.794	0.514	1.26162e-17	4.09178e-22	2.02436e-77
2	Mthfr	1.97849e-77	0.442471	0.608	0.405	6.10027e-73	1.54525e-24	0.574604	0.445	0.158	4.76446e-20	1.54525e-24	3.95697e-77
2	Cd2ap	2.45537e-77	0.473129	0.839	0.676	7.57064e-73	7.00855e-06	0.385775	0.813	0.662	0.216095	7.00855e-06	4.91074e-77
2	Slc25a22	3.64969e-77	0.419099	0.621	0.42	1.12531e-72	1.44132e-30	0.652433	0.568	0.212	4.44401e-26	1.44132e-30	7.29938e-77
2	Pygl	1.16096e-56	0.333902	0.487	0.298	3.57959e-52	2.13656e-76	1.01563	0.465	0.073	6.58766e-72	1.16096e-56	4.27312e-76
2	Treml2	2.53006e-76	0.401463	0.677	0.463	7.80094e-72	9.05603e-31	0.77271	0.574	0.215	2.79225e-26	9.05603e-31	5.06013e-76
2	Ilrun	4.41207e-76	0.393778	0.856	0.727	1.36037e-71	4.7828e-17	0.591381	0.716	0.451	1.47468e-12	4.7828e-17	8.82415e-76
2	Ap1s2	6.51644e-76	0.470629	0.683	0.487	2.00921e-71	3.41995e-16	0.714254	0.665	0.421	1.05447e-11	3.41995e-16	1.30329e-75
2	Tmem184b	9.34695e-76	0.42531	0.825	0.681	2.88195e-71	4.09716e-13	0.594945	0.729	0.527	1.26328e-08	4.09716e-13	1.86939e-75
2	Xbp1	1.29186e-75	0.425701	0.87	0.72	3.9832e-71	6.78485e-11	0.548327	0.794	0.654	2.09197e-06	6.78485e-11	2.58372e-75
2	Milr1	2.15759e-75	0.370872	0.659	0.433	6.65249e-71	5.79718e-41	0.768501	0.645	0.224	1.78744e-36	5.79718e-41	4.31518e-75
2	Syk	2.24339e-75	0.427624	0.848	0.672	6.91703e-71	6.75947e-32	0.8546	0.806	0.436	2.08415e-27	6.75947e-32	4.48677e-75
2	Fcer1g	7.33252e-75	0.39988	1	0.908	2.26084e-70	2.4582e-48	1.02547	1	0.709	7.57938e-44	2.4582e-48	1.4665e-74
2	Tmem106a	2.29732e-74	0.360111	0.794	0.568	7.08331e-70	3.12508e-49	0.892753	0.652	0.208	9.63555e-45	3.12508e-49	4.59463e-74
2	Dna2	5.42125e-74	0.363067	0.509	0.306	1.67153e-69	7.39845e-41	0.586381	0.394	0.09	2.28116e-36	7.39845e-41	1.08425e-73
2	St3gal1	9.24325e-62	0.405522	0.654	0.465	2.84997e-57	1.02126e-73	1.01431	0.594	0.123	3.14884e-69	9.24325e-62	2.04251e-73
2	Ndufb1	2.01441e-73	0.341177	0.939	0.833	6.21104e-69	7.94552e-53	1.16173	0.948	0.602	2.44984e-48	7.94552e-53	4.02883e-73
2	Tut7	9.8419e-73	0.417217	0.871	0.777	3.03455e-68	5.23473e-15	0.581993	0.858	0.644	1.61402e-10	5.23473e-15	1.96838e-72
2	Pstpip2	4.54966e-72	0.336933	0.468	0.262	1.4028e-67	5.41419e-21	0.357015	0.316	0.093	1.66936e-16	5.41419e-21	9.09932e-72
2	Ldlr	5.55171e-72	0.389125	0.543	0.329	1.71176e-67	2.66812e-19	0.485864	0.497	0.203	8.22662e-15	2.66812e-19	1.11034e-71
2	Ncf1	2.8222e-71	0.380025	0.958	0.752	8.70168e-67	6.11827e-08	0.338548	0.877	0.591	0.00188645	6.11827e-08	5.64439e-71
2	Apaf1	7.95013e-71	0.398771	0.762	0.577	2.45126e-66	4.19743e-49	1.09002	0.729	0.269	1.29419e-44	4.19743e-49	1.59003e-70
2	Ciita	7.66972e-35	0.317481	0.681	0.53	2.3648e-30	9.35413e-71	0.908627	0.394	0.055	2.88416e-66	7.66972e-35	1.87083e-70
2	Samd9l	1.60659e-67	0.358648	0.877	0.71	4.95361e-63	9.84766e-71	1.45644	0.794	0.242	3.03633e-66	1.60659e-67	1.96953e-70
2	Synj1	1.78529e-70	0.35859	0.872	0.717	5.50458e-66	1.17906e-14	0.621251	0.781	0.594	3.63539e-10	1.17906e-14	3.57057e-70
2	Cmpk1	4.05539e-70	0.382213	0.793	0.651	1.2504e-65	4.42001e-20	0.67893	0.69	0.43	1.36282e-15	4.42001e-20	8.11077e-70
2	Mpp1	4.39851e-70	0.453714	0.682	0.497	1.35619e-65	2.50878e-54	1.14901	0.748	0.278	7.73533e-50	2.50878e-54	8.79702e-70
2	Morc3	5.7999e-70	0.403603	0.867	0.735	1.78828e-65	7.71843e-19	0.57327	0.858	0.561	2.37982e-14	7.71843e-19	1.15998e-69
2	Slco3a1	1.17673e-69	0.46289	0.76	0.561	3.6282e-65	4.00767e-69	1.14285	0.652	0.148	1.23569e-64	4.00767e-69	2.35345e-69
2	Ddx58	9.26756e-69	0.409593	0.856	0.71	2.85747e-64	6.13814e-55	1.28792	0.826	0.35	1.89257e-50	6.13814e-55	1.85351e-68
2	Pde7b	1.00913e-68	0.549861	0.477	0.275	3.11145e-64	5.4001e-48	0.803517	0.374	0.07	1.66501e-43	5.4001e-48	2.01826e-68
2	ENSMUSG00000121141	1.03414e-68	0.35929	0.974	0.92	3.18856e-64	4.70113e-22	0.663354	0.961	0.849	1.4495e-17	4.70113e-22	2.06828e-68
2	Spi1	1.06058e-68	0.372659	0.968	0.731	3.27009e-64	4.83096e-34	0.843828	0.935	0.566	1.48953e-29	4.83096e-34	2.12116e-68
2	Hif1a	1.09081e-68	0.424725	0.934	0.822	3.3633e-64	4.70777e-53	1.53439	0.91	0.551	1.45155e-48	4.70777e-53	2.18162e-68
2	BC028528	2.5465e-68	0.345857	0.554	0.351	7.85162e-64	2.31561e-18	0.503978	0.406	0.164	7.13972e-14	2.31561e-18	5.093e-68
2	Tmod3	5.16462e-68	0.377358	0.904	0.817	1.59241e-63	4.3047e-52	1.21467	0.935	0.566	1.32727e-47	4.3047e-52	1.03292e-67
2	AA467197	1.49039e-09	0.458743	0.637	0.593	4.5953e-05	6.19296e-68	2.10185	0.458	0.077	1.90948e-63	1.49039e-09	1.23859e-67
2	Hpcal1	8.75147e-68	0.366163	0.837	0.68	2.69834e-63	3.5773e-29	0.822465	0.677	0.324	1.10299e-24	3.5773e-29	1.75029e-67
2	Tpst1	1.04467e-67	0.372828	0.565	0.378	3.22102e-63	2.94044e-13	0.448606	0.381	0.172	9.06625e-09	2.94044e-13	2.08933e-67
2	Casp4	1.76615e-67	0.446832	0.813	0.645	5.44557e-63	6.1304e-16	0.583165	0.768	0.468	1.89019e-11	6.1304e-16	3.5323e-67
2	Morrbid	2.26763e-66	0.451323	0.522	0.331	6.99177e-62	2.27459e-60	0.832574	0.452	0.084	7.01324e-56	2.27459e-60	4.53525e-66
2	Taldo1	9.34092e-66	0.303451	0.908	0.763	2.88009e-61	1.77823e-15	0.660897	0.794	0.546	5.4828e-11	1.77823e-15	1.86818e-65
2	Arhgdib	4.6805e-65	0.310139	0.991	0.902	1.44314e-60	2.07666e-53	1.38106	0.981	0.606	6.40298e-49	2.07666e-53	9.361e-65
2	G3bp2	1.60571e-64	0.394995	0.908	0.835	4.95088e-60	1.96409e-11	0.513036	0.819	0.711	6.05589e-07	1.96409e-11	3.21142e-64
2	Ube2l6	2.12547e-59	0.334733	0.882	0.696	6.55347e-55	3.0665e-64	1.37559	0.787	0.265	9.45494e-60	2.12547e-59	6.133e-64
2	Arhgap15	1.42999e-61	0.383423	0.788	0.594	4.40907e-57	3.21533e-64	1.05146	0.639	0.155	9.91383e-60	1.42999e-61	6.43066e-64
2	Tlr13	3.78808e-64	0.373984	0.659	0.468	1.16798e-59	9.21142e-07	0.371129	0.503	0.337	0.0284016	9.21142e-07	7.57616e-64
2	Cysltr1	6.64357e-64	0.358874	0.573	0.372	2.04841e-59	3.05895e-09	0.455949	0.548	0.35	9.43167e-05	3.05895e-09	1.32871e-63
2	Kat2b	8.03515e-64	0.387653	0.692	0.523	2.47748e-59	8.62476e-17	0.594566	0.71	0.443	2.65927e-12	8.62476e-17	1.60703e-63
2	H2-T24	2.92145e-63	0.326803	0.525	0.335	9.0077e-59	5.88486e-40	0.718062	0.458	0.125	1.81448e-35	5.88486e-40	5.8429e-63
2	Ifngr2	4.51436e-63	0.363495	0.897	0.708	1.39191e-58	6.32705e-28	0.869784	0.865	0.565	1.95082e-23	6.32705e-28	9.02873e-63
2	Sf3b1	6.64398e-63	0.312552	0.984	0.958	2.04854e-58	5.53604e-23	0.671155	0.955	0.838	1.70693e-18	5.53604e-23	1.3288e-62
2	Coro1a	1.50611e-61	0.323705	0.992	0.934	4.64379e-57	4.32238e-24	0.790224	0.955	0.635	1.33272e-19	4.32238e-24	3.01222e-61
2	Pml	5.40277e-61	0.327261	0.783	0.607	1.66584e-56	5.6785e-32	0.745035	0.581	0.218	1.75085e-27	5.6785e-32	1.08055e-60
2	Sec61g	7.82942e-61	0.329742	0.96	0.897	2.41404e-56	3.17808e-43	1.08562	0.961	0.778	9.79897e-39	3.17808e-43	1.56588e-60
2	Litaf	8.172e-61	0.35859	0.967	0.872	2.51967e-56	5.71706e-27	0.791414	0.948	0.703	1.76274e-22	5.71706e-27	1.6344e-60
2	Itpr1	1.15952e-60	0.351307	0.646	0.455	3.57514e-56	1.14112e-29	0.695634	0.51	0.179	3.51842e-25	1.14112e-29	2.31904e-60
2	Xaf1	1.16884e-60	0.322089	0.953	0.822	3.60387e-56	9.50087e-59	1.25957	0.871	0.352	2.9294e-54	9.50087e-59	2.33767e-60
2	Hopx	1.39908e-60	0.473829	0.686	0.484	4.31379e-56	2.73732e-31	0.81734	0.606	0.211	8.43997e-27	2.73732e-31	2.79816e-60
2	Ep300	1.68838e-60	0.383691	0.918	0.867	5.20578e-56	6.41225e-15	0.566047	0.935	0.798	1.97709e-10	6.41225e-15	3.37676e-60
2	Max	1.88834e-60	0.367889	0.847	0.732	5.82232e-56	1.83148e-16	0.6147	0.8	0.554	5.64699e-12	1.83148e-16	3.77668e-60
2	Dr1	1.93756e-60	0.420812	0.722	0.577	5.97409e-56	1.93499e-23	0.787845	0.606	0.309	5.96614e-19	1.93499e-23	3.87513e-60
2	Csrnp1	2.19292e-60	0.375668	0.932	0.82	6.76142e-56	3.54644e-24	0.748831	0.923	0.603	1.09348e-19	3.54644e-24	4.38584e-60
2	Pik3ap1	3.21603e-60	0.347907	0.92	0.744	9.916e-56	1.09761e-14	0.601349	0.774	0.509	3.38426e-10	1.09761e-14	6.43207e-60
2	Fes	2.23563e-59	0.314642	0.702	0.514	6.89311e-55	2.42599e-08	0.441863	0.452	0.274	0.000748005	2.42599e-08	4.47125e-59
2	Soat1	9.12609e-59	0.326453	0.877	0.701	2.81385e-54	6.57486e-30	0.811296	0.89	0.587	2.02723e-25	6.57486e-30	1.82522e-58
2	Rnf34	5.14123e-58	0.36288	0.709	0.555	1.5852e-53	4.74317e-20	0.650392	0.671	0.395	1.46246e-15	4.74317e-20	1.02825e-57
2	Mbd2	5.98571e-58	0.313802	0.888	0.777	1.84557e-53	2.76716e-46	0.987995	0.884	0.495	8.53197e-42	2.76716e-46	1.19714e-57
2	Iigp1	6.5571e-58	0.601333	0.844	0.739	2.02175e-53	8.93823e-47	1.81782	0.639	0.204	2.75592e-42	8.93823e-47	1.31142e-57
2	Ogfr	6.86274e-58	0.323681	0.691	0.535	2.11599e-53	2.1759e-24	0.515767	0.477	0.177	6.70895e-20	2.1759e-24	1.37255e-57
2	Pxk	9.1436e-58	0.34392	0.628	0.464	2.81925e-53	2.54373e-05	0.322816	0.516	0.388	0.78431	2.54373e-05	1.82872e-57
2	Hmox2	1.93746e-57	0.346777	0.693	0.537	5.97377e-53	2.58433e-05	0.365032	0.587	0.47	0.796828	2.58433e-05	3.87492e-57
2	Myo1f	2.28552e-57	0.339392	0.895	0.734	7.04694e-53	5.19828e-19	0.598817	0.781	0.48	1.60279e-14	5.19828e-19	4.57104e-57
2	Wars	2.55718e-57	0.379814	0.53	0.365	7.88456e-53	4.37904e-06	0.323878	0.2	0.097	0.135019	4.37904e-06	5.11436e-57
2	Gbp8	4.81148e-40	0.331767	0.816	0.684	1.48352e-35	4.12845e-57	1.07842	0.671	0.194	1.27293e-52	4.81148e-40	8.25691e-57
2	Bbx	1.8297e-56	0.483159	0.695	0.55	5.64151e-52	3.80007e-17	0.768945	0.665	0.412	1.17167e-12	3.80007e-17	3.6594e-56
2	Klf4	2.03966e-56	0.481839	0.707	0.519	6.28889e-52	2.96646e-18	0.539895	0.723	0.426	9.14649e-14	2.96646e-18	4.07933e-56
2	Ddi2	3.63245e-56	0.396001	0.743	0.601	1.11999e-51	3.06286e-07	0.459768	0.594	0.457	0.00944372	3.06286e-07	7.2649e-56
2	Tle3	5.22206e-56	0.4055	0.637	0.462	1.61012e-51	3.97877e-07	0.55135	0.574	0.444	0.0122677	3.97877e-07	1.04441e-55
2	Bak1	5.47841e-56	0.326217	0.8	0.639	1.68916e-51	1.5365e-20	0.611661	0.503	0.225	4.73749e-16	1.5365e-20	1.09568e-55
2	Setdb2	2.24636e-55	0.377872	0.498	0.326	6.9262e-51	1.56246e-33	0.611757	0.439	0.125	4.81752e-29	1.56246e-33	4.49272e-55
2	Fmnl1	5.17312e-55	0.346907	0.841	0.705	1.59503e-50	8.35834e-15	0.502635	0.819	0.538	2.57713e-10	8.35834e-15	1.03462e-54
2	Usp12	3.53802e-54	0.351977	0.712	0.56	1.09088e-49	5.14352e-06	0.318021	0.497	0.355	0.15859	5.14352e-06	7.07603e-54
2	Hnrnph2	5.39949e-54	0.343348	0.838	0.733	1.66483e-49	5.53648e-24	0.729566	0.871	0.626	1.70706e-19	5.53648e-24	1.0799e-53
2	Nlrp1b	6.76998e-54	0.383517	0.617	0.436	2.08739e-49	1.2765e-10	0.370609	0.406	0.205	3.93585e-06	1.2765e-10	1.354e-53
2	Man2a1	1.53158e-53	0.386947	0.795	0.636	4.72231e-49	1.28517e-37	1.02767	0.748	0.352	3.96256e-33	1.28517e-37	3.06315e-53
2	Usp25	2.30839e-53	0.325641	0.918	0.832	7.11746e-49	1.10028e-39	1	0.897	0.543	3.39248e-35	1.10028e-39	4.61678e-53
2	Pfkp	3.46701e-50	0.354087	0.733	0.558	1.06898e-45	3.32425e-53	0.857311	0.568	0.138	1.02497e-48	3.46701e-50	6.64851e-53
2	Atp11b	7.65776e-53	0.344669	0.865	0.759	2.36112e-48	6.9661e-27	0.962735	0.768	0.495	2.14786e-22	6.9661e-27	1.53155e-52
2	Hk2	1.67233e-52	0.355136	0.743	0.557	5.15628e-48	2.81024e-06	0.338628	0.742	0.565	0.0866481	2.81024e-06	3.34465e-52
2	Arhgef10l	4.62383e-52	0.311945	0.471	0.299	1.42566e-47	6.89076e-17	0.388502	0.374	0.141	2.12463e-12	6.89076e-17	9.24766e-52
2	Ptpn6	5.35869e-52	0.304593	0.965	0.807	1.65225e-47	2.08193e-20	0.679293	0.884	0.589	6.41921e-16	2.08193e-20	1.07174e-51
2	Hcls1	2.78644e-51	0.315441	0.915	0.767	8.59143e-47	4.03379e-20	0.650826	0.723	0.42	1.24374e-15	4.03379e-20	5.57288e-51
2	Mir22hg	2.85964e-51	0.31837	0.62	0.452	8.81712e-47	1.12437e-26	0.607269	0.497	0.188	3.46677e-22	1.12437e-26	5.71928e-51
2	Adam9	1.0511e-50	0.338521	0.73	0.57	3.24086e-46	1.09731e-11	0.53039	0.677	0.484	3.38334e-07	1.09731e-11	2.1022e-50
2	BC005537	3.575e-50	0.367608	0.968	0.942	1.10228e-45	6.83472e-07	0.31568	0.923	0.897	0.0210735	6.83472e-07	7.15001e-50
2	Ecm1	1.60151e-36	0.34354	0.403	0.26	4.93794e-32	5.64459e-50	0.771519	0.303	0.046	1.7404e-45	1.60151e-36	1.12892e-49
2	Pgk1	6.69516e-50	0.367588	0.914	0.806	2.06432e-45	3.45973e-39	1.10519	0.89	0.553	1.06674e-34	3.45973e-39	1.33903e-49
2	Coro1b	1.40292e-49	0.310324	0.912	0.796	4.32564e-45	1.96622e-27	0.718222	0.794	0.464	6.06244e-23	1.96622e-27	2.80585e-49
2	Casp1	2.50514e-49	0.348937	0.683	0.529	7.72411e-45	1.74224e-25	0.735633	0.658	0.324	5.37184e-21	1.74224e-25	5.01029e-49
2	Flt1	2.84492e-49	0.351689	0.513	0.334	8.77173e-45	4.24817e-47	0.489741	0.29	0.043	1.30984e-42	4.24817e-47	5.68983e-49
2	Rab5if	1.00305e-48	0.319176	0.751	0.623	3.0927e-44	1.68505e-16	0.517621	0.658	0.393	5.19553e-12	1.68505e-16	2.0061e-48
2	Mycbp2	5.03972e-48	0.37419	0.928	0.879	1.5539e-43	1.61401e-07	0.392262	0.89	0.813	0.00497646	1.61401e-07	1.00794e-47
2	Havcr2	1.00081e-47	0.406524	0.692	0.529	3.08579e-43	3.7465e-05	0.437636	0.626	0.463	1	3.7465e-05	2.00161e-47
2	Zup1	2.42219e-47	0.354566	0.747	0.616	7.46834e-43	1.31002e-17	0.757172	0.697	0.425	4.03918e-13	1.31002e-17	4.84438e-47
2	Herc6	2.68249e-42	0.311293	0.671	0.52	8.27092e-38	4.83025e-47	1.09568	0.652	0.22	1.48931e-42	2.68249e-42	9.66049e-47
2	Cxcl9	1.80934e-29	0.622961	0.665	0.541	5.57875e-25	7.66981e-47	2.86921	0.31	0.051	2.36483e-42	1.80934e-29	1.53396e-46
2	Selenot	2.13477e-46	0.300463	0.908	0.827	6.58213e-42	5.72301e-13	0.517021	0.91	0.776	1.76457e-08	5.72301e-13	4.26954e-46
2	Serp1	5.17528e-46	0.351312	0.904	0.823	1.59569e-41	3.19244e-15	0.604813	0.91	0.728	9.84325e-11	3.19244e-15	1.03506e-45
2	Akt3	1.68692e-45	0.343671	0.721	0.573	5.20129e-41	5.30364e-41	0.877088	0.716	0.278	1.63527e-36	5.30364e-41	3.37385e-45
2	Map2k1	1.93523e-45	0.32697	0.88	0.787	5.96689e-41	4.74098e-22	0.67463	0.903	0.727	1.46179e-17	4.74098e-22	3.87046e-45
2	Pycard	4.8571e-44	0.345485	0.732	0.59	1.49759e-39	9.75517e-07	0.411927	0.632	0.461	0.0300781	9.75517e-07	9.7142e-44
2	Dennd1a	1.44548e-43	0.353903	0.681	0.536	4.45684e-39	1.49634e-09	0.526823	0.523	0.327	4.61366e-05	1.49634e-09	2.89095e-43
2	Rbbp8	1.47276e-43	0.317547	0.578	0.418	4.54096e-39	9.37966e-22	0.604245	0.477	0.19	2.89203e-17	9.37966e-22	2.94552e-43
2	Camkk2	5.78558e-43	0.340981	0.46	0.313	1.78387e-38	1.80986e-11	0.450652	0.542	0.318	5.58035e-07	1.80986e-11	1.15712e-42
2	Nod1	8.56527e-43	0.312162	0.563	0.415	2.64093e-38	1.8962e-21	0.5781	0.465	0.19	5.84656e-17	1.8962e-21	1.71305e-42
2	Zfp800	2.87001e-41	0.323142	0.727	0.592	8.84912e-37	1.24255e-23	0.840628	0.671	0.366	3.83116e-19	1.24255e-23	5.74003e-41
2	Pgam1	9.0173e-41	0.334811	0.905	0.816	2.7803e-36	2.719e-28	1.0961	0.865	0.67	8.38349e-24	2.719e-28	1.80346e-40
2	Tiparp	1.86335e-40	0.424381	0.686	0.565	5.74527e-36	4.13282e-12	0.622877	0.639	0.421	1.27427e-07	4.13282e-12	3.7267e-40
2	Gsr	2.65619e-19	0.418668	0.478	0.408	8.18984e-15	2.82587e-40	1.3165	0.639	0.248	8.713e-36	2.65619e-19	5.65174e-40
2	Cdk2ap2	1.19626e-39	0.319455	0.811	0.702	3.68844e-35	8.82041e-27	0.841186	0.645	0.326	2.7196e-22	8.82041e-27	2.39253e-39
2	H2-DMb1	1.32783e-39	0.3511	0.751	0.595	4.0941e-35	1.0043e-23	0.754943	0.465	0.182	3.09656e-19	1.0043e-23	2.65566e-39
2	Zfp36l2	2.59345e-39	0.38339	0.935	0.922	7.99638e-35	2.59503e-09	0.5967	0.948	0.863	8.00127e-05	2.59503e-09	5.1869e-39
2	Skil	3.17799e-39	0.314823	0.956	0.899	9.79871e-35	1.86289e-11	0.455992	0.961	0.726	5.74385e-07	1.86289e-11	6.35599e-39
2	Upp1	1.91783e-38	0.370542	0.265	0.143	5.91324e-34	2.16898e-32	0.407364	0.135	0.014	6.68762e-28	2.16898e-32	3.83566e-38
2	Socs1	2.04786e-38	0.574738	0.616	0.496	6.31416e-34	3.24141e-31	0.787424	0.394	0.11	9.99423e-27	3.24141e-31	4.09571e-38
2	Cpt1a	3.66581e-38	0.307145	0.705	0.581	1.13028e-33	8.6916e-10	0.442282	0.645	0.458	2.67988e-05	8.6916e-10	7.33162e-38
2	Cited2	5.31294e-37	0.38258	0.781	0.665	1.63814e-32	4.75763e-13	0.546048	0.8	0.558	1.46692e-08	4.75763e-13	1.06259e-36
2	Slpi	6.61021e-36	0.342968	0.202	0.097	2.03813e-31	7.97248e-14	0.723987	0.206	0.061	2.45816e-09	7.97248e-14	1.32204e-35
2	Vegfa	1.54346e-26	0.383893	0.702	0.577	4.75895e-22	2.26872e-35	2.01293	0.606	0.249	6.99515e-31	1.54346e-26	4.53745e-35
2	Tnfsf10	1.6407e-34	0.303219	0.412	0.274	5.05877e-30	1.12106e-30	0.61498	0.4	0.11	3.45657e-26	1.12106e-30	3.2814e-34
2	Ifit3b	2.74038e-33	0.428196	0.523	0.392	8.44942e-29	1.30723e-27	1.00343	0.535	0.205	4.03057e-23	1.30723e-27	5.48077e-33
2	Dusp1	4.08871e-32	0.33827	0.927	0.845	1.26067e-27	2.58692e-09	0.467226	0.929	0.771	7.97625e-05	2.58692e-09	8.17743e-32
2	Osm	2.81084e-31	0.432859	0.711	0.558	8.66665e-27	5.00644e-22	1.14007	0.69	0.364	1.54364e-17	5.00644e-22	5.62167e-31
2	Fbxl5	2.87094e-30	0.326091	0.656	0.548	8.85197e-26	1.68755e-24	0.892926	0.671	0.365	5.20322e-20	1.68755e-24	5.74188e-30
2	Ctss	4.49412e-30	0.310323	1	0.971	1.38567e-25	4.41989e-09	0.437711	0.987	0.805	0.000136278	4.41989e-09	8.98824e-30
2	Hspa1a	1.43958e-24	0.72245	0.293	0.192	4.43865e-20	0.00317803	0.67496	0.284	0.209	1	0.00317803	2.87916e-24
2	Hspa1b	2.63795e-15	0.709672	0.248	0.174	8.1336e-11	9.11351e-07	0.838343	0.297	0.159	0.0280997	9.11351e-07	5.27591e-15
2	Cxcl11	9.19891e-09	0.500081	0.263	0.211	0.00028363	9.9746e-11	0.717492	0.129	0.034	3.07547e-06	9.19891e-09	1.99492e-10
2	Serpine1	2.73447e-07	0.48452	0.148	0.109	0.00843119	0.582567	0.351254	0.135	0.123	1	0.582567	5.46894e-07
3	Aif1	6.34624e-67	0.875933	0.997	0.744	1.95674e-62	0	1.25796	0.987	0.565	0	6.34624e-67	0
3	Bst2	1.89205e-24	0.396349	0.984	0.824	5.83375e-20	0	1.01927	0.828	0.287	0	1.89205e-24	0
3	C1qb	8.77468e-168	2.14236	1	0.656	2.7055e-163	0	1.26503	1	0.665	0	8.77468e-168	0
3	C1qc	1.4153e-193	2.64249	1	0.602	4.3638e-189	0	1.26281	1	0.654	0	1.4153e-193	0
3	Ccl12	2.25342e-178	2.85261	0.949	0.351	6.94796e-174	0	2.9088	0.955	0.402	0	2.25342e-178	0
3	Ccl2	9.14074e-103	1.78093	0.891	0.396	2.81836e-98	0	1.70449	0.756	0.236	0	9.14074e-103	0
3	Cd180	5.4956e-163	2.09992	1	0.648	1.69446e-158	0	1.51605	0.97	0.525	0	5.4956e-163	0
3	Cd72	2.66609e-65	0.807909	0.704	0.274	8.22034e-61	0	1.06712	0.535	0.07	0	2.66609e-65	0
3	Cox6a2	1.09441e-189	0.46442	0.399	0.037	3.3744e-185	0	0.519121	0.298	0.021	0	1.09441e-189	0
3	Cst7	8.75089e-134	1.71852	0.765	0.221	2.69816e-129	0	1.42436	0.576	0.118	0	8.75089e-134	0
3	Ctsb	4.33598e-131	1.64308	1	0.951	1.33691e-126	0	1.30543	1	0.971	0	4.33598e-131	0
3	Ctss	1.62501e-87	0.920374	1	0.974	5.01038e-83	0	1.45166	1	0.782	0	1.62501e-87	0
3	Ctsz	7.65959e-105	1.22337	1	0.807	2.36168e-100	0	1.37328	0.986	0.597	0	7.65959e-105	0
3	Fcgr1	5.64011e-24	0.427908	0.99	0.708	1.73901e-19	0	1.1808	0.963	0.464	0	5.64011e-24	0
3	Fcgr4	1.17533e-20	0.397402	0.958	0.665	3.6239e-16	0	1.36705	0.791	0.176	0	1.17533e-20	0
3	Gm4951	5.28233e-17	0.35512	0.836	0.54	1.6287e-12	0	1.15661	0.721	0.158	0	5.28233e-17	0
3	Grn	9.14664e-153	1.67569	1	0.859	2.82018e-148	0	1.59433	1	0.757	0	9.14664e-153	0
3	Hcar2	0	1.72251	0.791	0.109	0	0	1.5171	0.684	0.092	0	0	0
3	Lgals3bp	1.62092e-121	1.39597	0.997	0.913	4.99778e-117	0	2.21163	0.997	0.64	0	1.62092e-121	0
3	Lgals9	1.40087e-75	0.876456	0.987	0.85	4.3193e-71	0	1.37449	0.982	0.526	0	1.40087e-75	0
3	Lgmn	2.49916e-176	2.0321	1	0.741	7.70565e-172	0	1.21354	0.999	0.722	0	2.49916e-176	0
3	Ly86	6.41479e-179	2.32008	1	0.827	1.97787e-174	0	1.62878	1	0.692	0	6.41479e-179	0
3	Mpeg1	2.10573e-58	0.799834	1	0.807	6.49261e-54	0	1.34699	0.994	0.583	0	2.10573e-58	0
3	Pld4	4.31775e-92	1.05135	0.997	0.713	1.33129e-87	0	1.14625	0.988	0.54	0	4.31775e-92	0
3	Spint1	3.7039e-93	0.960322	0.923	0.407	1.14202e-88	0	0.91409	0.698	0.198	0	3.7039e-93	0
3	Npnt	0	1.35747	0.797	0.035	0	7.92978e-278	0.865801	0.632	0.171	2.44499e-273	7.92978e-278	0
3	Cd34	0	1.35708	0.83	0.051	0	1.31195e-238	0.832641	0.766	0.276	4.04512e-234	1.31195e-238	0
3	Adora3	0	1.18819	0.839	0.068	0	1.00394e-207	0.634287	0.735	0.267	3.09545e-203	1.00394e-207	0
3	Siglecf	0	0.734331	0.518	0.025	0	6.49958e-204	0.411802	0.382	0.075	2.00401e-199	6.49958e-204	0
3	Lag3	0	1.72708	0.923	0.102	0	4.101e-168	0.532447	0.615	0.216	1.26446e-163	4.101e-168	0
3	Lrrc3	0	1.40199	0.862	0.051	0	1.00733e-161	0.62982	0.888	0.421	3.10589e-157	1.00733e-161	0
3	Tmem119	0	2.21057	0.939	0.166	0	5.23797e-149	0.58158	0.836	0.374	1.61502e-144	5.23797e-149	0
3	Pros1	0	1.52793	0.926	0.164	0	1.06655e-141	0.593736	0.901	0.51	3.28849e-137	1.06655e-141	0
3	Ptgs1	0	2.18963	0.965	0.135	0	1.36401e-120	0.627206	0.955	0.509	4.20565e-116	1.36401e-120	0
3	Ildr2	0	0.603015	0.402	0.018	0	1.54533e-115	0.395025	0.536	0.204	4.76472e-111	1.54533e-115	0
3	Mlxipl	0	0.909121	0.723	0.037	0	2.43608e-84	0.349154	0.666	0.32	7.51115e-80	2.43608e-84	0
3	Slco2b1	0	2.00493	0.949	0.08	0	2.59487e-83	0.417848	0.938	0.503	8.00075e-79	2.59487e-83	0
3	Sall3	0	1.34821	0.791	0.038	0	5.43563e-82	0.393608	0.739	0.396	1.67597e-77	5.43563e-82	0
3	Bhlhe41	0	1.2644	0.836	0.084	0	3.70761e-80	0.490032	0.752	0.463	1.14317e-75	3.70761e-80	0
3	Ltc4s	0	1.06223	0.711	0.064	0	2.04618e-75	0.333944	0.804	0.421	6.30897e-71	2.04618e-75	0
3	Sall1	0	1.95521	0.932	0.07	0	1.34995e-70	0.366719	0.956	0.639	4.1623e-66	1.34995e-70	0
3	Siglech	0	2.38534	0.981	0.094	0	6.79265e-64	0.347078	0.991	0.53	2.09438e-59	6.79265e-64	0
3	Psap	3.01318e-50	0.589403	1	0.978	9.29055e-46	4.20565e-303	0.907422	1	0.981	1.29673e-298	3.01318e-50	8.4113e-303
3	Treml2	4.8201e-30	0.409509	0.82	0.485	1.48618e-25	2.36322e-299	0.738886	0.644	0.162	7.2865e-295	4.8201e-30	4.72643e-299
3	Sparc	7.98281e-299	3.54857	1	0.241	2.46134e-294	2.27076e-129	0.712726	0.998	0.793	7.00143e-125	2.27076e-129	1.59656e-298
3	C1qa	7.02016e-198	2.50886	1	0.455	2.16452e-193	7.90193e-295	1.13043	0.984	0.509	2.4364e-290	7.02016e-198	1.58039e-294
3	Gm4841	4.78669e-31	0.54697	0.463	0.189	1.47588e-26	2.38183e-291	0.649965	0.331	0.036	7.34389e-287	4.78669e-31	4.76365e-291
3	Ppfia4	2.5347e-168	1.49063	0.965	0.393	7.81525e-164	2.87202e-290	0.980072	0.87	0.378	8.8553e-286	2.5347e-168	5.74404e-290
3	Ctsc	1.20945e-18	0.474921	1	0.884	3.72908e-14	5.91243e-290	1.19963	0.996	0.653	1.82298e-285	1.20945e-18	1.18249e-289
3	Pik3ap1	8.96748e-45	0.69545	0.965	0.764	2.76494e-40	8.69559e-289	1.11742	0.925	0.457	2.68111e-284	8.96748e-45	1.73912e-288
3	Syngr1	1.51211e-280	1.12676	0.836	0.127	4.66229e-276	6.19636e-68	0.317102	0.693	0.377	1.91052e-63	6.19636e-68	3.02422e-280
3	Olfml3	3.61953e-279	3.01246	0.997	0.271	1.11601e-274	1.62976e-194	0.938361	0.988	0.543	5.02505e-190	1.62976e-194	7.23906e-279
3	Ccl4	2.98792e-117	2.59199	0.92	0.528	9.21265e-113	2.95869e-277	1.64351	0.919	0.506	9.12253e-273	2.98792e-117	5.91738e-277
3	Tor3a	3.1516e-20	0.385448	0.884	0.637	9.71733e-16	3.88951e-276	1.00819	0.782	0.288	1.19925e-271	3.1516e-20	7.77903e-276
3	Cd81	7.14825e-276	3.24551	1	0.28	2.20402e-271	8.00135e-80	0.377805	0.999	0.899	2.46706e-75	8.00135e-80	1.42965e-275
3	AU020206	8.65091e-32	0.541626	0.997	0.87	2.66734e-27	9.10586e-259	1.05557	0.967	0.548	2.80761e-254	8.65091e-32	1.82117e-258
3	Fcer1g	3.77071e-10	0.350598	0.997	0.919	1.16262e-05	4.3237e-258	1.05847	0.999	0.675	1.33313e-253	3.77071e-10	8.64741e-258
3	Pycard	4.28679e-83	0.961121	0.926	0.601	1.32175e-78	2.2514e-256	0.906795	0.876	0.408	6.94175e-252	4.28679e-83	4.50281e-256
3	Lacc1	4.34987e-53	0.742614	0.929	0.561	1.34119e-48	4.0988e-249	0.908405	0.911	0.428	1.26378e-244	4.34987e-53	8.19759e-249
3	Blnk	2.91658e-247	1.09709	0.823	0.135	8.99268e-243	2.93495e-105	0.396187	0.774	0.376	9.04933e-101	2.93495e-105	5.83315e-247
3	Itm2b	4.93687e-140	1.24831	1	0.994	1.52218e-135	8.61244e-238	0.663056	1	0.995	2.65547e-233	4.93687e-140	1.72249e-237
3	Cd36	3.72009e-237	1.25819	0.627	0.082	1.14702e-232	4.76984e-234	0.511947	0.3	0.038	1.47068e-229	4.76984e-234	7.44018e-237
3	Fcgr2b	6.74173e-36	0.591248	0.994	0.718	2.07868e-31	5.94686e-237	0.982094	0.984	0.593	1.83359e-232	6.74173e-36	1.18937e-236
3	Ccl3	4.72458e-132	2.74861	0.878	0.368	1.45673e-127	1.44031e-235	1.38329	0.901	0.464	4.44091e-231	4.72458e-132	2.88062e-235
3	Itgam	2.15544e-129	1.55898	0.997	0.692	6.64586e-125	2.80392e-235	1.08576	0.992	0.582	8.64531e-231	2.15544e-129	5.60783e-235
3	Tnf	2.12305e-127	2.67722	0.833	0.318	6.54601e-123	3.03825e-233	1.63217	0.856	0.41	9.36784e-229	2.12305e-127	6.0765e-233
3	Il1a	8.90786e-232	2.94163	0.91	0.226	2.74656e-227	1.03713e-230	1.38277	0.934	0.515	3.19779e-226	1.03713e-230	1.78157e-231
3	Lat2	3.57985e-38	0.602975	0.907	0.611	1.10378e-33	1.3072e-229	0.882122	0.845	0.38	4.03048e-225	3.57985e-38	2.61439e-229
3	Ctsl	5.23113e-181	2.05843	0.987	0.498	1.61291e-176	2.64979e-226	0.938031	0.989	0.726	8.17011e-222	5.23113e-181	5.29959e-226
3	Naaa	6.72618e-33	0.49189	0.904	0.595	2.07388e-28	2.46902e-225	0.945745	0.797	0.352	7.61273e-221	6.72618e-33	4.93804e-225
3	Man2b1	1.81283e-115	1.25513	0.977	0.712	5.5895e-111	2.49254e-222	0.887439	0.974	0.598	7.68524e-218	1.81283e-115	4.98508e-222
3	Timp2	2.5953e-221	2.08209	0.961	0.293	8.0021e-217	1.6693e-62	0.450991	0.961	0.767	5.14697e-58	1.6693e-62	5.19061e-221
3	C4b	1.58561e-218	2.04988	0.907	0.224	4.88891e-214	2.76859e-164	0.876587	0.737	0.345	8.53638e-160	2.76859e-164	3.17122e-218
3	Pon3	6.41969e-218	0.64351	0.63	0.086	1.97938e-213	6.6197e-106	0.315154	0.523	0.2	2.04105e-101	6.6197e-106	1.28394e-217
3	Ccl7	1.14956e-70	1.28275	0.466	0.126	3.54444e-66	4.23447e-214	1.01689	0.355	0.064	1.30561e-209	1.14956e-70	8.46894e-214
3	Lpcat2	8.09209e-152	1.51126	0.997	0.658	2.49503e-147	8.46454e-214	0.884596	0.993	0.626	2.60987e-209	8.09209e-152	1.69291e-213
3	Tyrobp	1.98448e-34	0.520068	1	0.886	6.11873e-30	3.66417e-209	0.927087	0.999	0.66	1.12977e-204	1.98448e-34	7.32834e-209
3	Egr3	3.29375e-207	2.03864	0.576	0.079	1.01556e-202	1.05565e-81	0.616759	0.468	0.206	3.25488e-77	1.05565e-81	6.5875e-207
3	Trem2	2.67356e-206	2.11435	0.994	0.383	8.24338e-202	4.87245e-174	0.828001	0.995	0.548	1.50232e-169	4.87245e-174	5.34712e-206
3	Nectin4	4.03223e-86	0.552493	0.656	0.197	1.24326e-81	6.65549e-206	0.496842	0.537	0.149	2.05209e-201	4.03223e-86	1.3311e-205
3	Lair1	7.61826e-87	1.01655	0.994	0.648	2.34894e-82	1.27993e-204	0.849543	0.994	0.58	3.94641e-200	7.61826e-87	2.55986e-204
3	Irf8	5.86854e-29	0.332954	0.997	0.856	1.80945e-24	4.16139e-204	0.847448	0.96	0.544	1.28308e-199	5.86854e-29	8.32278e-204
3	Cxcl13	5.15073e-142	1.66603	0.225	0.015	1.58812e-137	8.06219e-203	2.1139	0.193	0.015	2.48582e-198	5.15073e-142	1.61244e-202
3	Ophn1	1.83758e-202	1.34365	0.862	0.203	5.66582e-198	5.21989e-88	0.425372	0.853	0.496	1.60945e-83	5.21989e-88	3.67517e-202
3	Rab3il1	1.90517e-202	1.12632	0.891	0.212	5.87421e-198	8.99119e-114	0.454546	0.807	0.403	2.77225e-109	8.99119e-114	3.81034e-202
3	Lap3	9.29428e-201	1.6288	0.955	0.315	2.8657e-196	2.76306e-166	0.750722	0.836	0.459	8.51933e-162	2.76306e-166	1.85886e-200
3	Ly9	1.36086e-13	0.375667	0.669	0.462	4.19595e-09	1.92892e-198	0.677032	0.633	0.216	5.94744e-194	1.36086e-13	3.85784e-198
3	Kcnk6	1.73068e-197	1.38371	0.942	0.28	5.33619e-193	1.32367e-182	0.661543	0.899	0.427	4.08127e-178	1.32367e-182	3.46135e-197
3	Lyn	3.3537e-57	0.665763	0.994	0.801	1.03405e-52	5.07688e-194	0.794208	0.985	0.619	1.56535e-189	3.3537e-57	1.01538e-193
3	Gpr84	8.82481e-137	0.882288	0.595	0.118	2.72095e-132	1.18547e-191	0.83518	0.706	0.264	3.65517e-187	8.82481e-137	2.37094e-191
3	Tent5c	1.52077e-56	0.841458	0.923	0.55	4.689e-52	1.71397e-190	0.976931	0.792	0.376	5.28468e-186	1.52077e-56	3.42794e-190
3	Gns	4.03305e-83	0.927827	0.994	0.799	1.24351e-78	1.81508e-190	0.754493	0.985	0.738	5.59642e-186	4.03305e-83	3.63015e-190
3	Sdc3	8.37895e-32	0.546016	0.958	0.775	2.58348e-27	2.86588e-188	0.627291	0.918	0.501	8.83637e-184	8.37895e-32	5.73176e-188
3	Mef2c	3.80971e-188	1.67675	0.971	0.319	1.17465e-183	6.68685e-67	0.331609	0.978	0.571	2.06176e-62	6.68685e-67	7.61942e-188
3	Serp1	1.66169e-26	0.481146	0.952	0.831	5.12348e-22	1.10335e-186	0.841684	0.946	0.701	3.40196e-182	1.66169e-26	2.2067e-186
3	Cx3cr1	3.86278e-185	2.43163	0.994	0.473	1.19101e-180	3.54961e-56	0.447419	0.996	0.612	1.09445e-51	3.54961e-56	7.72556e-185
3	Tmsb4x	1.8776e-26	0.312484	1	0.999	5.78921e-22	1.38567e-184	0.769258	1	0.988	4.27244e-180	1.8776e-26	2.77134e-184
3	Hexb	2.46085e-184	3.1374	1	0.792	7.58755e-180	1.67746e-136	0.884684	1	0.772	5.1721e-132	1.67746e-136	4.92171e-184
3	Pabpc1	3.58929e-29	0.402245	0.997	0.991	1.10668e-24	1.15784e-183	0.736595	0.997	0.894	3.56996e-179	3.58929e-29	2.31568e-183
3	Atp6v0a2	2.34802e-81	0.928031	0.952	0.648	7.23964e-77	5.59826e-183	0.900967	0.88	0.566	1.72611e-178	2.34802e-81	1.11965e-182
3	Lcp2	1.35219e-52	0.654882	0.955	0.665	4.16921e-48	9.82211e-182	0.705402	0.895	0.473	3.02845e-177	1.35219e-52	1.96442e-181
3	Ntpcr	1.13678e-129	1.20938	0.897	0.371	3.50503e-125	2.99915e-181	0.717847	0.796	0.371	9.24728e-177	1.13678e-129	5.9983e-181
3	Ctsd	7.82679e-173	2.51252	0.994	0.663	2.41323e-168	1.91607e-179	0.894455	0.976	0.645	5.90781e-175	7.82679e-173	3.83213e-179
3	Il10ra	4.00669e-30	0.512953	0.984	0.82	1.23538e-25	8.87765e-179	0.787691	0.962	0.561	2.73725e-174	4.00669e-30	1.77553e-178
3	Capza2	1.82001e-18	0.30787	0.997	0.928	5.61165e-14	1.84416e-178	0.667586	0.995	0.822	5.68611e-174	1.82001e-18	3.68833e-178
3	Hk2	1.83331e-49	0.614586	0.949	0.574	5.65264e-45	7.51605e-178	0.701398	0.94	0.516	2.31742e-173	1.83331e-49	1.50321e-177
3	Tgfbr2	9.46912e-125	1.21453	0.984	0.687	2.91961e-120	4.98548e-177	0.756732	0.987	0.637	1.53717e-172	9.46912e-125	9.97096e-177
3	Sat1	3.83972e-53	0.864253	0.984	0.898	1.1839e-48	3.45329e-176	0.88954	0.995	0.854	1.06475e-171	3.83972e-53	6.90659e-176
3	Ncf1	5.5845e-58	0.792169	0.984	0.776	1.72187e-53	1.10615e-174	0.764042	0.961	0.545	3.41059e-170	5.5845e-58	2.2123e-174
3	Laptm5	1.59184e-121	0.974647	1	0.95	4.90811e-117	1.06361e-173	0.79546	1	0.672	3.27942e-169	1.59184e-121	2.12721e-173
3	Bin1	3.00464e-173	1.76198	0.974	0.437	9.2642e-169	1.54693e-53	0.301109	0.858	0.56	4.76966e-49	1.54693e-53	6.00928e-173
3	Pdgfb	3.22721e-173	1.42036	0.801	0.188	9.95044e-169	9.04072e-93	0.462364	0.71	0.354	2.78752e-88	9.04072e-93	6.45441e-173
3	ENSMUSG00000120992	9.71271e-28	0.531625	0.752	0.454	2.99472e-23	4.79138e-172	0.748941	0.766	0.316	1.47733e-167	9.71271e-28	9.58276e-172
3	Fcgr3	1.89606e-86	1.11518	0.984	0.7	5.84612e-82	5.6125e-172	0.835978	0.991	0.587	1.7305e-167	1.89606e-86	1.1225e-171
3	Anxa3	9.45229e-172	1.40902	0.929	0.308	2.91442e-167	8.80409e-147	0.605378	0.951	0.503	2.71457e-142	8.80409e-147	1.89046e-171
3	Abhd12	5.316e-171	1.79643	0.994	0.629	1.63908e-166	1.0699e-130	0.590084	0.981	0.751	3.29883e-126	1.0699e-130	1.0632e-170
3	Mertk	5.238e-168	1.627	0.965	0.353	1.61503e-163	4.71437e-65	0.341539	0.969	0.671	1.45358e-60	4.71437e-65	1.0476e-167
3	Cd63	8.38392e-168	1.80449	0.952	0.325	2.58501e-163	7.75033e-134	0.843453	0.931	0.724	2.38966e-129	7.75033e-134	1.67678e-167
3	Itga6	1.63059e-167	1.24892	0.865	0.228	5.0276e-163	1.20003e-117	0.604672	0.894	0.522	3.70006e-113	1.20003e-117	3.26118e-167
3	Plek	2.68915e-64	0.873329	0.994	0.86	8.29144e-60	2.28249e-167	0.799767	0.995	0.652	7.03759e-163	2.68915e-64	4.56497e-167
3	Cfl1	6.90036e-47	0.457116	1	1	2.12759e-42	2.83711e-167	0.514078	1	0.998	8.74767e-163	6.90036e-47	5.67423e-167
3	Hebp1	8.9078e-165	0.606663	0.605	0.102	2.74654e-160	1.44993e-144	0.361047	0.484	0.151	4.47058e-140	1.44993e-144	1.78156e-164
3	Gusb	3.49807e-55	0.710944	0.907	0.584	1.07856e-50	5.45482e-164	0.695377	0.878	0.512	1.68188e-159	3.49807e-55	1.09096e-163
3	Slc11a1	1.23606e-46	0.623209	0.907	0.521	3.81115e-42	6.11634e-161	0.630767	0.821	0.385	1.88585e-156	1.23606e-46	1.22327e-160
3	Csf1r	8.15777e-160	1.73552	1	0.741	2.51528e-155	8.82707e-71	0.627757	0.999	0.662	2.72165e-66	8.82707e-71	1.63155e-159
3	Spata13	4.71405e-22	0.38168	0.9	0.659	1.45348e-17	1.91558e-158	0.695437	0.895	0.507	5.90632e-154	4.71405e-22	3.83117e-158
3	Pfkfb3	1.93356e-52	0.759376	0.92	0.602	5.96174e-48	1.39647e-157	0.758121	0.874	0.486	4.30572e-153	1.93356e-52	2.79293e-157
3	Sting1	3.71596e-54	0.679519	0.965	0.711	1.14574e-49	9.83204e-154	0.658358	0.895	0.476	3.03151e-149	3.71596e-54	1.96641e-153
3	Cd9	3.22178e-153	1.70992	0.981	0.512	9.93373e-149	7.15003e-63	0.455703	0.973	0.794	2.20457e-58	7.15003e-63	6.44357e-153
3	Fgd2	5.04703e-146	1.27098	0.897	0.313	1.55615e-141	4.09876e-153	0.562417	0.816	0.373	1.26377e-148	5.04703e-146	8.19752e-153
3	Cgas	2.88055e-17	0.361926	0.608	0.36	8.8816e-13	1.54601e-151	0.641694	0.625	0.243	4.76682e-147	2.88055e-17	3.09202e-151
3	Rgs10	6.52826e-150	1.5675	0.987	0.624	2.01286e-145	8.29174e-97	0.544542	0.988	0.608	2.55659e-92	8.29174e-97	1.30565e-149
3	Dtx4	1.3974e-149	0.920857	0.859	0.244	4.30861e-145	7.02937e-76	0.370085	0.779	0.442	2.16737e-71	7.02937e-76	2.7948e-149
3	Tnfsf13b	1.02167e-45	0.450829	0.592	0.227	3.15013e-41	3.13055e-149	0.410035	0.396	0.106	9.65244e-145	1.02167e-45	6.26111e-149
3	E230029C05Rik	8.18872e-85	1.33773	0.9	0.47	2.52483e-80	6.86648e-149	0.701909	0.865	0.44	2.11714e-144	8.18872e-85	1.3733e-148
3	Itgb5	2.53283e-148	1.48327	0.961	0.471	7.80946e-144	6.40486e-100	0.469383	0.919	0.536	1.97481e-95	6.40486e-100	5.06565e-148
3	Csf1	2.14964e-147	1.71561	0.788	0.208	6.62799e-143	6.77726e-50	0.643396	0.681	0.427	2.08963e-45	6.77726e-50	4.29928e-147
3	Efhd2	7.83483e-48	0.608239	1	0.916	2.41571e-43	8.63755e-147	0.638452	0.948	0.575	2.66322e-142	7.83483e-48	1.72751e-146
3	Cd33	4.50079e-146	1.45786	0.955	0.399	1.38773e-141	8.35505e-123	0.616671	0.978	0.554	2.57611e-118	8.35505e-123	9.00159e-146
3	Tlr7	3.97042e-97	0.847424	0.904	0.381	1.2242e-92	1.3501e-145	0.558104	0.878	0.437	4.16276e-141	3.97042e-97	2.7002e-145
3	Rhoh	8.40382e-87	0.894339	0.916	0.447	2.59115e-82	3.5399e-145	0.566316	0.873	0.439	1.09146e-140	8.40382e-87	7.0798e-145
3	Bin2	7.68941e-83	0.944548	0.961	0.638	2.37087e-78	1.04702e-144	0.611609	0.869	0.45	3.22829e-140	7.68941e-83	2.09405e-144
3	Ssr4	6.50183e-37	0.476921	0.904	0.654	2.00471e-32	1.53725e-144	0.593824	0.87	0.522	4.7398e-140	6.50183e-37	3.0745e-144
3	G530011O06Rik	8.6922e-119	0.784887	0.691	0.175	2.68007e-114	4.73989e-144	0.596753	0.811	0.382	1.46145e-139	8.6922e-119	9.47977e-144
3	Lpl	1.61529e-124	0.500277	0.286	0.029	4.98043e-120	8.27425e-144	0.724982	0.237	0.041	2.5512e-139	1.61529e-124	1.65485e-143
3	Rab27a	4.79979e-51	0.49222	0.797	0.362	1.47992e-46	1.84107e-143	0.439019	0.642	0.248	5.67656e-139	4.79979e-51	3.68213e-143
3	Marcks	3.0495e-143	1.65467	1	0.769	9.40253e-139	6.26091e-65	0.46139	0.999	0.856	1.93043e-60	6.26091e-65	6.099e-143
3	Daglb	9.82891e-143	1.04762	0.904	0.314	3.03055e-138	1.04801e-113	0.469196	0.866	0.477	3.23132e-109	1.04801e-113	1.96578e-142
3	Sowahc	3.71011e-19	0.463747	0.807	0.561	1.14394e-14	1.26833e-142	0.725202	0.813	0.443	3.91065e-138	3.71011e-19	2.53666e-142
3	Csf3r	1.12794e-54	0.781385	0.945	0.581	3.47776e-50	1.64253e-142	0.623198	0.935	0.506	5.06441e-138	1.12794e-54	3.28506e-142
3	Cd83	9.79382e-68	1.21714	0.949	0.707	3.01973e-63	9.90219e-141	0.775118	0.974	0.627	3.05314e-136	9.79382e-68	1.98044e-140
3	Acer3	4.2787e-17	0.307198	0.875	0.603	1.31925e-12	2.46105e-139	0.66846	0.846	0.466	7.58815e-135	4.2787e-17	4.9221e-139
3	Sass6	8.61025e-30	0.310734	0.576	0.265	2.6548e-25	2.57116e-139	0.556906	0.534	0.197	7.92765e-135	8.61025e-30	5.14232e-139
3	Dnajc13	1.13589e-43	0.61734	0.9	0.646	3.50229e-39	2.61279e-138	0.631493	0.883	0.566	8.05602e-134	1.13589e-43	5.22558e-138
3	Nlrp3	5.07733e-29	0.871118	0.884	0.594	1.56549e-24	3.1002e-138	0.849401	0.935	0.547	9.55885e-134	5.07733e-29	6.2004e-138
3	Cd37	5.41833e-103	0.989706	0.974	0.512	1.67063e-98	4.48304e-138	0.574337	0.922	0.502	1.38225e-133	5.41833e-103	8.96607e-138
3	Comt	5.01653e-138	1.31653	0.952	0.464	1.54675e-133	6.94883e-56	0.33234	0.949	0.755	2.14253e-51	6.94883e-56	1.00331e-137
3	F11r	1.86687e-70	0.862522	0.981	0.619	5.75611e-66	8.84087e-138	0.610906	0.941	0.511	2.72591e-133	1.86687e-70	1.76817e-137
3	Asah1	1.31159e-32	0.527701	0.977	0.765	4.04404e-28	2.89746e-133	0.566593	0.979	0.74	8.93372e-129	1.31159e-32	5.79491e-133
3	Cd300c2	5.18126e-40	0.492134	0.91	0.546	1.59754e-35	1.41451e-132	0.50108	0.845	0.412	4.36136e-128	5.18126e-40	2.82902e-132
3	P2ry6	6.48746e-62	0.595717	0.875	0.417	2.00028e-57	2.23994e-132	0.429074	0.731	0.314	6.90641e-128	6.48746e-62	4.47988e-132
3	Unc93b1	3.8278e-53	0.663666	1	0.822	1.18022e-48	9.74161e-131	0.616128	0.991	0.608	3.00363e-126	3.8278e-53	1.94832e-130
3	Tcn2	1.18619e-96	0.921105	0.92	0.479	3.65738e-92	2.90732e-130	0.579717	0.937	0.586	8.96413e-126	1.18619e-96	5.81463e-130
3	Sipa1l2	6.55273e-130	0.903211	0.814	0.252	2.0204e-125	2.23927e-64	0.328449	0.751	0.441	6.90434e-60	2.23927e-64	1.31055e-129
3	Plcg2	2.2571e-20	0.349198	0.926	0.647	6.95931e-16	8.2369e-130	0.489406	0.81	0.399	2.53968e-125	2.2571e-20	1.64738e-129
3	Mpi	5.34595e-129	0.541761	0.605	0.124	1.64832e-124	2.39256e-81	0.321585	0.569	0.263	7.37696e-77	2.39256e-81	1.06919e-128
3	Smim3	3.70952e-20	0.381846	0.817	0.572	1.14376e-15	6.49404e-125	0.574526	0.708	0.339	2.00231e-120	3.70952e-20	1.29881e-124
3	Pla2g4a	4.35569e-46	0.512576	0.727	0.335	1.34299e-41	8.38251e-125	0.50041	0.672	0.298	2.58458e-120	4.35569e-46	1.6765e-124
3	Rrbp1	1.50599e-33	0.530482	0.987	0.883	4.64343e-29	2.65578e-122	0.563363	0.963	0.694	8.18857e-118	1.50599e-33	5.31157e-122
3	Tnfrsf11a	1.09481e-49	0.504674	0.727	0.313	3.37562e-45	5.18593e-122	0.492861	0.804	0.395	1.59898e-117	1.09481e-49	1.03719e-121
3	Trpm2	6.87324e-54	0.519439	0.704	0.294	2.11923e-49	8.83374e-122	0.386892	0.55	0.207	2.72371e-117	6.87324e-54	1.76675e-121
3	Lhfpl2	1.31958e-121	1.35236	0.83	0.292	4.06865e-117	1.47088e-85	0.653184	0.648	0.356	4.53517e-81	1.47088e-85	2.63916e-121
3	Kctd12	6.31896e-121	2.01182	0.977	0.684	1.94832e-116	5.02889e-57	0.380728	0.987	0.716	1.55056e-52	5.02889e-57	1.26379e-120
3	Slc7a7	4.5007e-83	0.64406	0.759	0.272	1.3877e-78	9.57994e-121	0.375892	0.675	0.283	2.95378e-116	4.5007e-83	1.91599e-120
3	Ehd4	1.57037e-34	0.481112	0.929	0.641	4.84192e-30	1.84166e-120	0.531897	0.907	0.535	5.67839e-116	1.57037e-34	3.68332e-120
3	Adam15	2.86083e-120	0.969483	0.91	0.392	8.82081e-116	2.56768e-59	0.305754	0.768	0.468	7.91693e-55	2.56768e-59	5.72167e-120
3	Hsp90b1	3.28535e-66	0.768832	0.997	0.955	1.01297e-61	3.41416e-120	0.569135	0.995	0.954	1.05269e-115	3.28535e-66	6.82832e-120
3	Calr	1.2794e-43	0.640856	1	0.947	3.94477e-39	4.60974e-120	0.635561	0.997	0.952	1.42132e-115	1.2794e-43	9.21948e-120
3	Sdf2l1	4.18571e-38	0.427916	0.756	0.377	1.29058e-33	6.68621e-120	0.462324	0.617	0.265	2.06156e-115	4.18571e-38	1.33724e-119
3	Plcb2	3.04571e-82	0.65053	0.746	0.268	9.39085e-78	1.47818e-118	0.378305	0.623	0.253	4.55766e-114	3.04571e-82	2.95635e-118
3	Fbxw4	4.08799e-80	0.659736	0.785	0.304	1.26045e-75	3.24653e-118	0.392267	0.65	0.277	1.001e-113	4.08799e-80	6.49307e-118
3	Cd68	1.57854e-27	0.458289	0.987	0.735	4.8671e-23	3.51145e-118	0.625123	0.978	0.589	1.08268e-113	1.57854e-27	7.02289e-118
3	Atp8a1	1.88164e-117	1.41797	0.971	0.617	5.80165e-113	2.94381e-59	0.44038	0.934	0.744	9.07664e-55	2.94381e-59	3.76327e-117
3	Fermt3	2.79062e-31	0.49821	0.926	0.742	8.60432e-27	2.79992e-117	0.475153	0.88	0.471	8.633e-113	2.79062e-31	5.59984e-117
3	Rpl10a	1.03162e-33	0.438441	0.981	0.802	3.1808e-29	2.21647e-116	0.513838	0.919	0.647	6.83405e-112	1.03162e-33	4.43294e-116
3	Pla2g15	7.09599e-97	0.769359	0.817	0.293	2.18791e-92	6.19293e-116	0.441357	0.735	0.345	1.90947e-111	7.09599e-97	1.23859e-115
3	Lmo2	5.10723e-113	1.10019	0.923	0.449	1.57471e-108	9.69477e-116	0.489864	0.881	0.479	2.98919e-111	5.10723e-113	1.93895e-115
3	C5ar1	2.50681e-31	0.56643	0.807	0.451	7.72925e-27	1.22573e-115	0.516966	0.8	0.401	3.77928e-111	2.50681e-31	2.45145e-115
3	Hexa	4.85284e-115	1.1114	0.965	0.585	1.49628e-110	3.48435e-72	0.31059	0.704	0.371	1.07433e-67	3.48435e-72	9.70568e-115
3	Pomp	3.89069e-16	0.32448	0.968	0.86	1.19962e-11	1.45054e-114	0.539996	0.901	0.651	4.47243e-110	3.89069e-16	2.90107e-114
3	Cd84	3.66676e-25	0.471871	0.92	0.598	1.13057e-20	9.06705e-114	0.557217	0.864	0.473	2.79564e-109	3.66676e-25	1.81341e-113
3	Ikzf1	1.49601e-27	0.467419	0.955	0.774	4.61266e-23	1.23821e-113	0.57357	0.971	0.608	3.81777e-109	1.49601e-27	2.47642e-113
3	Frmd4a	2.21751e-76	0.891658	0.932	0.521	6.83723e-72	2.19437e-113	0.522931	0.929	0.575	6.76589e-109	2.21751e-76	4.38873e-113
3	Abi3	7.42197e-58	0.704555	0.894	0.536	2.28841e-53	2.49044e-113	0.448851	0.792	0.396	7.67878e-109	7.42197e-58	4.98089e-113
3	Ctsa	1.79483e-76	0.924149	0.984	0.789	5.53401e-72	1.37451e-112	0.567664	0.956	0.676	4.23803e-108	1.79483e-76	2.74903e-112
3	Adgre1	8.14917e-55	0.659224	0.904	0.487	2.51263e-50	6.79611e-112	0.486254	0.951	0.508	2.09545e-107	8.14917e-55	1.35922e-111
3	Ighm	2.59914e-100	0.957929	0.855	0.339	8.01392e-96	2.22338e-111	0.520783	0.851	0.455	6.85535e-107	2.59914e-100	4.44676e-111
3	Plk3	1.15256e-47	0.783844	0.823	0.456	3.55369e-43	7.24639e-111	0.459567	0.678	0.314	2.23428e-106	1.15256e-47	1.44928e-110
3	Naglu	1.75045e-110	0.700239	0.756	0.23	5.39716e-106	2.18394e-92	0.335101	0.572	0.251	6.73375e-88	2.18394e-92	3.5009e-110
3	Heatr5a	1.34904e-92	0.839573	0.855	0.36	4.15949e-88	5.41758e-110	0.445922	0.866	0.485	1.6704e-105	1.34904e-92	1.08352e-109
3	Epb41l2	1.8719e-109	1.10655	0.99	0.762	5.77162e-105	8.81838e-70	0.351093	0.991	0.762	2.71897e-65	8.81838e-70	3.7438e-109
3	Btk	8.52092e-30	0.34225	0.733	0.391	2.62726e-25	6.7489e-109	0.391933	0.734	0.346	2.08089e-104	8.52092e-30	1.34978e-108
3	Slc7a8	8.35755e-72	0.813432	0.916	0.5	2.57688e-67	1.12808e-108	0.468797	0.94	0.529	3.47821e-104	8.35755e-72	2.25616e-108
3	Man2b2	3.39243e-108	0.800231	0.83	0.299	1.04599e-103	3.6325e-105	0.396709	0.674	0.316	1.12001e-100	3.6325e-105	6.78487e-108
3	Mafb	8.32115e-42	0.687838	0.981	0.645	2.56566e-37	3.95603e-108	0.461908	0.963	0.574	1.21976e-103	8.32115e-42	7.91206e-108
3	Cndp2	1.26215e-21	0.323482	0.923	0.669	3.89159e-17	1.03281e-107	0.50862	0.854	0.525	3.18448e-103	1.26215e-21	2.06563e-107
3	Pdia3	4.26692e-47	0.574854	0.99	0.919	1.31562e-42	3.67021e-106	0.500157	0.982	0.906	1.13163e-101	4.26692e-47	7.34041e-106
3	Hps3	6.80966e-40	0.477267	0.794	0.416	2.09962e-35	5.88064e-106	0.428633	0.813	0.426	1.81318e-101	6.80966e-40	1.17613e-105
3	Map3k8	1.64362e-17	0.30239	0.656	0.39	5.06777e-13	6.51673e-106	0.442954	0.691	0.325	2.0093e-101	1.64362e-17	1.30335e-105
3	Tlr3	2.15441e-66	0.554183	0.662	0.234	6.6427e-62	4.68661e-105	0.392987	0.594	0.251	1.44502e-100	2.15441e-66	9.37323e-105
3	Nlrp1b	2.57507e-17	0.377744	0.72	0.455	7.93972e-13	9.9068e-105	0.372572	0.466	0.173	3.05456e-100	2.57507e-17	1.98136e-104
3	Tmem268	1.1778e-35	0.44957	0.746	0.385	3.63153e-31	2.85431e-104	0.395854	0.595	0.259	8.8007e-100	1.1778e-35	5.70863e-104
3	Nckap1l	4.66934e-72	0.733802	0.952	0.679	1.4397e-67	3.35576e-104	0.457916	0.937	0.543	1.03468e-99	4.66934e-72	6.71152e-104
3	Itpripl2	2.11443e-22	0.304331	0.791	0.482	6.51943e-18	6.7544e-104	0.442681	0.718	0.356	2.08258e-99	2.11443e-22	1.35088e-103
3	Nfkbid	8.69018e-35	0.91582	0.865	0.68	2.67944e-30	2.41375e-103	0.566316	0.884	0.522	7.44231e-99	8.69018e-35	4.8275e-103
3	Nfxl1	2.44844e-64	0.470525	0.611	0.2	7.54926e-60	2.94522e-103	0.38262	0.623	0.276	9.08101e-99	2.44844e-64	5.89045e-103
3	Ch25h	1.14125e-52	0.73205	0.299	0.069	3.51882e-48	3.84208e-103	0.371894	0.124	0.014	1.18463e-98	1.14125e-52	7.68416e-103
3	Cotl1	1.23036e-48	0.644879	0.968	0.812	3.79358e-44	7.0561e-103	0.512934	0.858	0.53	2.17561e-98	1.23036e-48	1.41122e-102
3	Serinc3	1.23825e-102	0.932936	1	0.989	3.81789e-98	1.03413e-53	0.416441	0.998	0.954	3.18852e-49	1.03413e-53	2.47649e-102
3	Hspa5	8.11871e-28	0.510245	0.997	0.975	2.50324e-23	1.29776e-102	0.649636	0.992	0.952	4.00139e-98	8.11871e-28	2.59552e-102
3	Bmp2k	5.0929e-67	0.847052	0.977	0.719	1.57029e-62	1.29781e-102	0.5346	0.957	0.689	4.00154e-98	5.0929e-67	2.59562e-102
3	Scamp2	1.39409e-100	1.02233	0.99	0.79	4.29841e-96	7.47738e-95	0.470468	0.976	0.726	2.3055e-90	7.47738e-95	2.78819e-100
3	Rtcb	8.76383e-27	0.435142	0.859	0.605	2.70215e-22	1.26603e-99	0.497066	0.796	0.48	3.90356e-95	8.76383e-27	2.53206e-99
3	Akr1b3	1.42797e-95	0.925087	0.881	0.428	4.40285e-91	2.7976e-99	0.473292	0.72	0.389	8.62583e-95	1.42797e-95	5.59519e-99
3	Snx5	1.7886e-33	0.498706	0.974	0.841	5.51478e-29	1.0448e-98	0.512436	0.985	0.749	3.22143e-94	1.7886e-33	2.0896e-98
3	Lamp2	3.18247e-29	0.474306	0.99	0.869	9.8125e-25	2.76509e-98	0.470139	0.986	0.89	8.52559e-94	3.18247e-29	5.53017e-98
3	St6galnac4	4.93888e-49	0.349391	0.672	0.265	1.52281e-44	4.77373e-98	0.3111	0.54	0.222	1.47188e-93	4.93888e-49	9.54745e-98
3	Pou2f2	1.88626e-87	1.01379	0.952	0.493	5.8159e-83	6.55644e-98	0.491659	0.911	0.531	2.02155e-93	1.88626e-87	1.31129e-97
3	Camk1d	1.86689e-27	0.481661	0.865	0.583	5.75619e-23	1.49021e-97	0.466385	0.786	0.433	4.59475e-93	1.86689e-27	2.98041e-97
3	Nrp1	2.64298e-64	0.63216	0.823	0.357	8.14909e-60	1.76262e-97	0.406158	0.79	0.415	5.4347e-93	2.64298e-64	3.52525e-97
3	Arhgap25	1.4341e-14	0.316533	0.743	0.506	4.42176e-10	8.31898e-97	0.391984	0.632	0.291	2.56499e-92	1.4341e-14	1.6638e-96
3	Cds1	3.46751e-72	0.545276	0.666	0.226	1.06914e-67	1.93141e-95	0.349278	0.609	0.272	5.95512e-91	3.46751e-72	3.86282e-95
3	Slc25a5	7.14355e-26	0.379985	0.997	0.934	2.20257e-21	6.74741e-95	0.458923	0.983	0.891	2.08043e-90	7.14355e-26	1.34948e-94
3	Parvg	9.762e-38	0.533111	0.881	0.566	3.00992e-33	1.40297e-94	0.433742	0.824	0.441	4.32577e-90	9.762e-38	2.80594e-94
3	Icam1	2.61681e-43	0.846556	0.926	0.671	8.06842e-39	3.24188e-94	0.479401	0.943	0.572	9.99569e-90	2.61681e-43	6.48376e-94
3	Cyfip1	3.47651e-94	1.00857	0.987	0.771	1.07191e-89	7.56727e-58	0.334202	0.986	0.797	2.33322e-53	7.56727e-58	6.95303e-94
3	Apbb1ip	2.53136e-72	0.852921	0.99	0.785	7.80494e-68	4.37647e-94	0.51521	0.988	0.654	1.3494e-89	2.53136e-72	8.75294e-94
3	Edem1	7.93699e-29	0.480541	0.939	0.769	2.44721e-24	8.04256e-94	0.44372	0.901	0.566	2.47976e-89	7.93699e-29	1.60851e-93
3	Mylip	1.35659e-51	0.788036	0.92	0.612	4.18277e-47	1.07131e-93	0.444512	0.917	0.545	3.30316e-89	1.35659e-51	2.14261e-93
3	Erp29	8.15982e-35	0.483981	0.945	0.718	2.51592e-30	4.51087e-93	0.434537	0.807	0.486	1.39084e-88	8.15982e-35	9.02174e-93
3	Dram2	3.53883e-29	0.425416	0.865	0.56	1.09113e-24	1.16838e-92	0.451045	0.833	0.516	3.60247e-88	3.53883e-29	2.33676e-92
3	Hspe1	5.83182e-32	0.47516	0.92	0.705	1.79812e-27	2.10856e-92	0.500082	0.911	0.717	6.50131e-88	5.83182e-32	4.21711e-92
3	Cyth4	1.38484e-42	0.575237	0.977	0.819	4.26989e-38	2.33104e-92	0.479651	0.979	0.606	7.18729e-88	1.38484e-42	4.66207e-92
3	Evi2a	2.92585e-44	0.654442	0.929	0.652	9.02128e-40	3.88576e-92	0.449445	0.922	0.58	1.1981e-87	2.92585e-44	7.77151e-92
3	Tbxas1	6.21055e-52	0.707483	0.804	0.391	1.9149e-47	4.11016e-92	0.356689	0.671	0.315	1.26729e-87	6.21055e-52	8.22033e-92
3	Ppm1h	2.75631e-45	0.675777	0.859	0.528	8.49854e-41	8.68036e-92	0.452909	0.741	0.405	2.67642e-87	2.75631e-45	1.73607e-91
3	Prkcb	1.14358e-91	1.06399	0.926	0.493	3.52599e-87	1.13087e-68	0.414278	0.931	0.678	3.48681e-64	1.13087e-68	2.28716e-91
3	Ccnd1	4.81197e-84	0.783379	0.881	0.348	1.48367e-79	1.60215e-91	0.462718	0.852	0.49	4.9399e-87	4.81197e-84	3.20429e-91
3	Rps6ka1	1.39251e-67	0.741218	0.907	0.53	4.29352e-63	5.29907e-91	0.369532	0.785	0.404	1.63386e-86	1.39251e-67	1.05981e-90
3	Sirpa	2.65184e-89	1.08922	0.984	0.677	8.1764e-85	3.47534e-71	0.396127	0.986	0.721	1.07155e-66	3.47534e-71	5.30367e-89
3	Gcnt1	6.09042e-81	0.636438	0.759	0.263	1.87786e-76	3.85927e-88	0.359346	0.672	0.324	1.18993e-83	6.09042e-81	7.71853e-88
3	ENSMUSG00000121092	2.05177e-72	0.400178	0.624	0.187	6.32621e-68	6.78104e-88	0.3326	0.635	0.297	2.0908e-83	2.05177e-72	1.35621e-87
3	Runx1	1.31693e-15	0.368318	0.904	0.697	4.0605e-11	3.23225e-87	0.432334	0.885	0.507	9.966e-83	1.31693e-15	6.4645e-87
3	AI506816	2.02672e-59	0.421187	0.621	0.211	6.24898e-55	4.23123e-87	0.338626	0.509	0.221	1.30461e-82	2.02672e-59	8.46246e-87
3	Klf2	9.00653e-18	0.999452	0.624	0.401	2.77698e-13	3.09671e-85	0.62783	0.639	0.333	9.54808e-81	9.00653e-18	6.19342e-85
3	Acsl4	3.36735e-33	0.467063	0.807	0.48	1.03826e-28	3.71073e-85	0.416173	0.726	0.398	1.14413e-80	3.36735e-33	7.42145e-85
3	Eif4a1	1.37471e-18	0.330314	0.99	0.94	4.23863e-14	1.03017e-84	0.407654	0.997	0.94	3.17632e-80	1.37471e-18	2.06034e-84
3	Clta	3.10507e-84	0.742119	0.99	0.927	9.57386e-80	5.32619e-84	0.420807	0.973	0.791	1.64222e-79	5.32619e-84	6.21014e-84
3	Icosl	2.6074e-35	0.435592	0.788	0.427	8.0394e-31	3.6275e-84	0.427674	0.66	0.334	1.11847e-79	2.6074e-35	7.25501e-84
3	Slc16a6	5.43654e-84	1.00425	0.875	0.414	1.67625e-79	7.88795e-74	0.374448	0.889	0.53	2.43209e-69	7.88795e-74	1.08731e-83
3	Tgs1	2.64921e-38	0.527945	0.862	0.531	8.1683e-34	7.31538e-84	0.493057	0.832	0.525	2.25555e-79	2.64921e-38	1.46308e-83
3	Inpp5d	1.86808e-45	0.642535	0.968	0.776	5.75986e-41	1.06068e-82	0.403088	0.965	0.583	3.2704e-78	1.86808e-45	2.12137e-82
3	Srsf9	9.93169e-27	0.388722	0.916	0.681	3.06224e-22	1.31049e-82	0.412111	0.883	0.584	4.04063e-78	9.93169e-27	2.62098e-82
3	Smap2	1.43454e-82	0.894978	0.971	0.749	4.42312e-78	9.32423e-52	0.302345	0.979	0.759	2.87494e-47	9.32423e-52	2.86908e-82
3	Ppp1r15a	4.77745e-28	0.932887	0.846	0.663	1.47303e-23	4.01791e-82	0.592086	0.845	0.544	1.23884e-77	4.77745e-28	8.03581e-82
3	Ppt1	7.02063e-29	0.373264	0.949	0.698	2.16467e-24	1.47691e-81	0.398334	0.904	0.646	4.55375e-77	7.02063e-29	2.95382e-81
3	Socs3	8.49902e-22	0.607467	0.916	0.767	2.6205e-17	6.06202e-81	0.559052	0.927	0.67	1.8691e-76	8.49902e-22	1.2124e-80
3	Slc29a3	3.55125e-29	0.469071	0.958	0.71	1.09496e-24	7.14704e-81	0.434917	0.846	0.519	2.20365e-76	3.55125e-29	1.42941e-80
3	Ptprj	2.35563e-53	0.795342	0.936	0.632	7.26311e-49	4.46668e-80	0.422391	0.932	0.634	1.37721e-75	2.35563e-53	8.93337e-80
3	Camk2d	9.3352e-35	0.516416	0.894	0.576	2.87832e-30	6.95786e-79	0.431119	0.775	0.467	2.14532e-74	9.3352e-35	1.39157e-78
3	Nucb1	4.08429e-54	0.665533	0.92	0.673	1.25931e-49	7.23885e-79	0.409708	0.909	0.658	2.23196e-74	4.08429e-54	1.44777e-78
3	Hltf	4.30562e-35	0.485197	0.775	0.434	1.32755e-30	5.70034e-78	0.420214	0.75	0.437	1.75759e-73	4.30562e-35	1.14007e-77
3	Tmed3	2.29137e-36	0.403568	0.765	0.408	7.06498e-32	8.464e-77	0.323986	0.692	0.368	2.6097e-72	2.29137e-36	1.6928e-76
3	Cttnbp2nl	1.91415e-53	0.695287	0.984	0.694	5.90189e-49	2.00483e-76	0.390515	0.973	0.704	6.18149e-72	1.91415e-53	4.00966e-76
3	Nek7	6.99829e-59	0.685202	0.965	0.708	2.15778e-54	2.39039e-76	0.409454	0.937	0.705	7.37028e-72	6.99829e-59	4.78077e-76
3	Evl	1.80704e-34	0.436032	0.936	0.655	5.57165e-30	4.0723e-76	0.372713	0.815	0.498	1.25561e-71	1.80704e-34	8.14459e-76
3	Cebpzos	2.85331e-61	0.45572	0.643	0.233	8.7976e-57	4.88521e-76	0.306806	0.592	0.288	1.50626e-71	2.85331e-61	9.77043e-76
3	Slc36a1	1.70064e-52	0.515595	0.814	0.383	5.24357e-48	9.81186e-76	0.33757	0.733	0.397	3.02529e-71	1.70064e-52	1.96237e-75
3	Ncstn	1.11154e-22	0.382813	0.894	0.652	3.4272e-18	4.7404e-74	0.38579	0.877	0.61	1.46161e-69	1.11154e-22	9.4808e-74
3	Ccni	2.50722e-51	0.66403	0.968	0.846	7.73051e-47	4.10629e-72	0.411153	0.967	0.828	1.26609e-67	2.50722e-51	8.21258e-72
3	Cmtm6	2.02479e-69	0.768405	0.961	0.713	6.24302e-65	1.6122e-71	0.371374	0.96	0.64	4.97089e-67	2.02479e-69	3.2244e-71
3	Rcan1	1.08265e-70	1.0232	0.508	0.148	3.33812e-66	4.36734e-38	0.327408	0.336	0.173	1.34658e-33	4.36734e-38	2.16529e-70
3	Nmt1	1.74627e-22	0.376304	0.939	0.757	5.38426e-18	1.80363e-70	0.370837	0.874	0.602	5.56115e-66	1.74627e-22	3.60727e-70
3	Usp21	1.00335e-57	0.483831	0.688	0.266	3.09363e-53	2.12601e-70	0.342816	0.673	0.365	6.55513e-66	1.00335e-57	4.25202e-70
3	Hmox1	4.5945e-15	0.301165	0.695	0.44	1.41662e-10	3.61884e-70	0.315774	0.696	0.376	1.1158e-65	4.5945e-15	7.23767e-70
3	Dnase2a	1.78848e-31	0.38343	0.73	0.396	5.51441e-27	2.41565e-69	0.304921	0.733	0.395	7.44818e-65	1.78848e-31	4.83131e-69
3	Nfkbiz	1.75006e-33	1.14848	0.852	0.682	5.39596e-29	5.68654e-69	0.466951	0.921	0.649	1.75333e-64	1.75006e-33	1.13731e-68
3	Adap2	1.30327e-18	0.387735	0.929	0.656	4.01838e-14	3.97095e-68	0.301491	0.909	0.518	1.22436e-63	1.30327e-18	7.9419e-68
3	Tspan14	1.43495e-52	0.65228	0.952	0.639	4.42439e-48	4.27937e-66	0.368483	0.95	0.721	1.31946e-61	1.43495e-52	8.55874e-66
3	Leprot	5.47217e-47	0.615804	0.897	0.64	1.68724e-42	8.14407e-63	0.361557	0.908	0.646	2.51106e-58	5.47217e-47	1.62881e-62
3	Ssh2	2.08301e-32	0.563965	0.955	0.782	6.42256e-28	1.11546e-62	0.367692	0.97	0.754	3.4393e-58	2.08301e-32	2.23092e-62
3	Herpud1	8.84851e-62	1.06045	0.881	0.496	2.72826e-57	1.77088e-56	0.5215	0.913	0.716	5.46016e-52	1.77088e-56	1.7697e-61
3	Cd2ap	1.34727e-19	0.341127	0.939	0.693	4.15403e-15	6.9875e-58	0.347474	0.9	0.633	2.15446e-53	1.34727e-19	1.3975e-57
3	Ywhah	3.95584e-46	0.641306	0.987	0.886	1.2197e-41	1.07822e-57	0.357926	0.98	0.838	3.32448e-53	3.95584e-46	2.15645e-57
3	Lamp1	8.27754e-31	0.506549	0.997	0.898	2.55221e-26	7.25806e-57	0.347312	0.992	0.916	2.23788e-52	8.27754e-31	1.45161e-56
3	Eif5b	1.01542e-19	0.367926	0.894	0.711	3.13085e-15	3.58669e-56	0.36051	0.88	0.663	1.10588e-51	1.01542e-19	7.17337e-56
3	Lrmda	1.42737e-18	0.435726	0.608	0.337	4.401e-14	1.2801e-55	0.301893	0.425	0.196	3.94694e-51	1.42737e-18	2.56021e-55
3	Rab1a	3.47819e-20	0.345324	0.968	0.874	1.07243e-15	1.53924e-55	0.327806	0.966	0.87	4.74593e-51	3.47819e-20	3.07847e-55
3	Adam10	5.01884e-41	0.568596	0.949	0.73	1.54746e-36	2.04409e-55	0.343095	0.891	0.674	6.30254e-51	5.01884e-41	4.08818e-55
3	Tmem86a	4.22117e-37	0.51629	0.907	0.538	1.30151e-32	2.57456e-55	0.322725	0.696	0.411	7.93813e-51	4.22117e-37	5.14911e-55
3	Nfkbia	1.59282e-14	0.658888	0.881	0.778	4.91115e-10	1.1959e-54	0.456096	0.926	0.716	3.6873e-50	1.59282e-14	2.39179e-54
3	Fbrsl1	8.3358e-41	0.5512	0.91	0.581	2.57018e-36	5.3337e-54	0.317843	0.876	0.615	1.64454e-49	8.3358e-41	1.06674e-53
3	Zfp36	1.05718e-18	0.534756	0.968	0.935	3.2596e-14	2.0983e-51	0.41496	0.993	0.821	6.46968e-47	1.05718e-18	4.1966e-51
3	Usp8	2.21372e-32	0.515935	0.9	0.687	6.82556e-28	4.84955e-51	0.312077	0.892	0.659	1.49526e-46	2.21372e-32	9.6991e-51
3	Vdac2	3.3939e-18	0.314303	0.971	0.848	1.04644e-13	1.60343e-49	0.332037	0.911	0.755	4.94384e-45	3.3939e-18	3.20685e-49
3	Nr4a1	0.0238818	0.333483	0.772	0.805	1	4.90709e-49	0.487799	0.836	0.645	1.513e-44	0.0238818	9.81418e-49
3	P4ha1	1.71178e-27	0.469213	0.852	0.57	5.27792e-23	1.3829e-47	0.317219	0.827	0.573	4.26391e-43	1.71178e-27	2.76581e-47
3	Ptms	2.44448e-41	0.650594	0.99	0.864	7.53706e-37	8.91362e-47	0.301367	0.858	0.602	2.74834e-42	2.44448e-41	1.78272e-46
3	Manf	1.13867e-15	0.353483	0.894	0.696	3.51087e-11	4.98828e-37	0.308522	0.791	0.553	1.53803e-32	1.13867e-15	9.97655e-37
4	Abcb1a	1.55563e-290	1.19204	0.573	0.144	4.79648e-286	0	1.39308	0.516	0.027	0	1.55563e-290	0
4	Acap1	0	1.16868	0.72	0.15	0	0	1.57999	0.645	0.023	0	0	0
4	BE692007	1.08084e-200	1.03494	0.463	0.134	3.33256e-196	0	1.2483	0.437	0.022	0	1.08084e-200	0
4	Bcl11b	0	2.31837	0.83	0.043	0	0	2.57679	0.836	0.036	0	0	0
4	Cd2	0	2.17073	0.878	0.111	0	0	2.41583	0.78	0.019	0	0	0
4	Cd226	0	1.5996	0.675	0.085	0	0	1.92816	0.591	0.022	0	0	0
4	Cd247	0	1.51989	0.704	0.084	0	0	1.58397	0.588	0.018	0	0	0
4	Cd27	0	1.33726	0.622	0.068	0	0	1.31783	0.453	0.01	0	0	0
4	Cd28	0	2.29231	0.807	0.073	0	0	2.49953	0.789	0.016	0	0	0
4	Cd3d	0	2.05991	0.856	0.041	0	0	1.99994	0.774	0.008	0	0	0
4	Cd3e	0	3.02022	0.965	0.056	0	0	3.4358	0.978	0.014	0	0	0
4	Cd3g	0	2.4995	0.919	0.041	0	0	2.60829	0.899	0.011	0	0	0
4	Cd4	0	2.30383	0.416	0.049	0	0	2.5708	0.478	0.019	0	0	0
4	Cd40lg	0	0.783767	0.253	0.01	0	0	1.21336	0.321	0.004	0	0	0
4	Cd5	0	1.52926	0.554	0.034	0	0	1.13743	0.368	0.009	0	0	0
4	Cd6	0	1.13527	0.444	0.023	0	0	1.22294	0.425	0.006	0	0	0
4	Cd69	1.10929e-136	1.16889	0.724	0.417	3.42027e-132	0	2.27269	0.726	0.089	0	1.10929e-136	0
4	Cd8a	0	2.18304	0.406	0.035	0	0	2.48802	0.393	0.007	0	0	0
4	Cd8b1	0	1.9179	0.35	0.025	0	0	1.86432	0.368	0.005	0	0	0
4	Cd96	0	0.731025	0.387	0.048	0	0	0.900874	0.362	0.009	0	0	0
4	Ctla2a	1.97904e-289	1.02048	0.545	0.112	6.10198e-285	0	1.82437	0.563	0.024	0	1.97904e-289	0
4	Ctsw	0	1.32138	0.653	0.125	0	0	1.80687	0.635	0.02	0	0	0
4	Cxcr3	0	1.50487	0.656	0.083	0	0	1.4949	0.591	0.014	0	0	0
4	Cxcr6	0	2.41682	0.593	0.033	0	0	2.55053	0.569	0.011	0	0	0
4	Cysltr2	3.40423e-227	0.926642	0.468	0.112	1.04963e-222	0	0.964467	0.355	0.013	0	3.40423e-227	0
4	Cytip	4.02945e-161	0.819979	0.961	0.681	1.2424e-156	0	2.33989	0.881	0.104	0	4.02945e-161	0
4	Dennd2d	0	1.16468	0.584	0.136	0	0	1.29882	0.478	0.031	0	0	0
4	ENSMUSG00000121093	0	1.71459	0.896	0.336	0	0	2.46545	0.84	0.048	0	0	0
4	Fam169b	0	0.931718	0.399	0.033	0	0	1.13061	0.396	0.009	0	0	0
4	Fasl	0	1.09907	0.58	0.102	0	0	1.67954	0.563	0.016	0	0	0
4	Gata3	0	1.17037	0.523	0.071	0	0	1.53102	0.516	0.014	0	0	0
4	Gimap3	0	2.81942	0.995	0.195	0	0	3.95079	0.987	0.037	0	0	0
4	Gimap4	0	2.46469	0.976	0.202	0	0	3.55974	0.972	0.03	0	0	0
4	Gimap5	0	0.923206	0.569	0.091	0	0	0.91512	0.387	0.016	0	0	0
4	Gimap6	0	2.1964	0.961	0.188	0	0	2.72709	0.915	0.126	0	0	0
4	Gimap7	0	1.53886	0.728	0.108	0	0	2.04171	0.704	0.016	0	0	0
4	Gimap8	0	1.65423	0.882	0.145	0	0	2.19041	0.862	0.025	0	0	0
4	Gimap9	0	1.62223	0.82	0.137	0	0	2.0318	0.723	0.045	0	0	0
4	Gm2682	0	2.05138	0.771	0.121	0	0	2.49809	0.686	0.025	0	0	0
4	Gm8369	0	1.84605	0.744	0.143	0	0	2.13731	0.723	0.027	0	0	0
4	Gpr174	0	1.04754	0.527	0.065	0	0	1.21627	0.425	0.011	0	0	0
4	Gpr68	7.21446e-298	0.887738	0.456	0.081	2.22443e-293	0	1.13823	0.462	0.021	0	7.21446e-298	0
4	Grap2	0	1.71564	0.78	0.204	0	0	2.21221	0.758	0.033	0	0	0
4	Gstp3	0	0.72988	0.354	0.029	0	0	0.6838	0.28	0.007	0	0	0
4	Gzmb	1.61991e-247	1.52857	0.619	0.179	4.99467e-243	0	3.0167	0.45	0.022	0	1.61991e-247	0
4	Gzmk	0	0.987662	0.283	0.018	0	0	1.3057	0.318	0.006	0	0	0
4	Icos	0	3.19095	0.806	0.089	0	0	3.08365	0.72	0.04	0	0	0
4	Ifi203	1.93555e-97	0.753901	0.964	0.832	5.96789e-93	0	2.93796	0.934	0.14	0	1.93555e-97	0
4	Ifi214	3.43477e-215	1.13341	0.507	0.146	1.05904e-210	0	1.59148	0.528	0.033	0	3.43477e-215	0
4	Ikzf3	0	1.33179	0.637	0.095	0	0	1.24451	0.428	0.018	0	0	0
4	Il18r1	0	1.47134	0.583	0.098	0	0	1.63623	0.475	0.014	0	0	0
4	Il27ra	0	0.919111	0.495	0.046	0	0	0.969469	0.396	0.009	0	0	0
4	Il2rb	0	1.65417	0.973	0.187	0	0	2.91523	0.959	0.03	0	0	0
4	Il7r	0	2.36078	0.667	0.186	0	0	3.48124	0.767	0.108	0	0	0
4	Itgal	7.15438e-227	1.11966	0.931	0.682	2.20591e-222	0	2.3794	0.877	0.104	0	7.15438e-227	0
4	Itk	0	2.17249	0.9	0.108	0	0	2.65926	0.881	0.025	0	0	0
4	Izumo1r	0	0.795244	0.278	0.013	0	0	1.01339	0.217	0.002	0	0	0
4	Klrc1	8.50172e-272	1.41348	0.433	0.075	2.62133e-267	0	1.47449	0.318	0.01	0	8.50172e-272	0
4	Lat	0	1.87638	0.773	0.055	0	0	1.78033	0.673	0.013	0	0	0
4	Lax1	0	1.36267	0.735	0.12	0	0	1.46944	0.522	0.019	0	0	0
4	Lck	0	2.40168	0.922	0.144	0	0	2.7065	0.931	0.028	0	0	0
4	Mndal	2.92608e-99	0.759062	0.984	0.858	9.02197e-95	0	2.90875	0.943	0.144	0	2.92608e-99	0
4	Ms4a4b	0	2.82477	0.983	0.342	0	0	4.22409	0.978	0.052	0	0	0
4	Nkg7	0	1.86043	0.757	0.162	0	0	2.75584	0.698	0.024	0	0	0
4	P2ry10	0	1.62117	0.914	0.301	0	0	2.58359	0.893	0.049	0	0	0
4	Pglyrp2	0	0.787893	0.448	0.044	0	0	0.958138	0.377	0.01	0	0	0
4	Ptpn22	0	2.2326	0.969	0.327	0	0	2.98662	0.934	0.065	0	0	0
4	Ptpn7	2.42264e-131	0.837845	0.571	0.27	7.46973e-127	0	1.24461	0.497	0.034	0	2.42264e-131	0
4	Ptprcap	0	1.82109	0.902	0.158	0	0	2.10436	0.758	0.029	0	0	0
4	Rnf125	0	1.65547	0.762	0.089	0	0	1.9444	0.726	0.031	0	0	0
4	Septin1	0	1.73071	0.886	0.179	0	0	1.89767	0.761	0.056	0	0	0
4	Sh2d1a	0	0.823881	0.433	0.061	0	0	1.03477	0.39	0.008	0	0	0
4	Sh2d2a	0	1.46546	0.803	0.139	0	0	1.83684	0.682	0.02	0	0	0
4	Sidt1	0	1.32044	0.573	0.065	0	0	1.18886	0.431	0.015	0	0	0
4	Skap1	0	2.11178	0.921	0.162	0	0	2.51029	0.811	0.041	0	0	0
4	Spn	0	1.3961	0.78	0.194	0	0	1.55977	0.585	0.033	0	0	0
4	Stat4	0	1.22571	0.801	0.243	0	0	1.74174	0.657	0.046	0	0	0
4	Tbc1d10c	0	0.88745	0.534	0.104	0	0	0.888336	0.387	0.017	0	0	0
4	Tbx21	1.41493e-240	0.888314	0.551	0.137	4.36266e-236	0	1.27146	0.487	0.02	0	1.41493e-240	0
4	Tcf7	0	2.09118	0.756	0.093	0	0	2.30046	0.664	0.026	0	0	0
4	Themis	0	1.60303	0.557	0.034	0	0	1.85411	0.569	0.014	0	0	0
4	Thy1	0	2.67735	0.914	0.122	0	0	3.15214	0.893	0.077	0	0	0
4	Tnfrsf18	0	1.17536	0.586	0.117	0	0	1.55218	0.503	0.017	0	0	0
4	Trac	0	3.37526	0.904	0.076	0	0	3.75249	0.95	0.02	0	0	0
4	Trbc1	0	1.71769	0.621	0.135	0	0	2.03224	0.56	0.021	0	0	0
4	Trbc2	0	3.38776	0.974	0.121	0	0	3.61108	0.928	0.023	0	0	0
4	Trgc2	5.06459e-288	1.25222	0.197	0.008	1.56156e-283	0	1.6863	0.223	0.003	0	5.06459e-288	0
4	Ubash3a	0	1.04885	0.491	0.04	0	0	1.17218	0.453	0.011	0	0	0
4	Zap70	0	1.30081	0.664	0.067	0	0	0.828988	0.327	0.01	0	0	0
4	Gimap1	0	1.38275	0.745	0.113	0	1.4967e-288	1.54313	0.645	0.075	4.61479e-284	1.4967e-288	0
4	Ccnd2	0	1.63313	0.974	0.476	0	5.06999e-287	2.98031	0.956	0.217	1.56323e-282	5.06999e-287	0
4	Nlrc3	0	0.884596	0.483	0.073	0	4.37703e-261	0.8999	0.377	0.023	1.34957e-256	4.37703e-261	0
4	Hcst	0	1.4903	0.818	0.248	0	1.12434e-260	1.8849	0.767	0.135	3.46667e-256	1.12434e-260	0
4	Lef1	0	0.945754	0.435	0.058	0	2.34849e-252	0.998498	0.371	0.023	7.2411e-248	2.34849e-252	0
4	Gramd3	0	2.15578	0.868	0.404	0	2.14242e-240	2.51625	0.833	0.184	6.60572e-236	2.14242e-240	0
[truncated: 20,116 more rows]

## Sheet: m6A sites per cell type
m6A sites per cell per cell type
Cell type	Number cells	Total variants	Average of variants
OLG	353	21264	60.238
IMC	10388	380143	36.5944
NEUR	141	5385	38.1915
ASC	67	1564	23.3433
EC	40	757	18.925
Sum	10989	409113

## Sheet: m6A sites per cluster
m6A sites information in each clusters
Cluster	Cell type	Number of cells	Total variants	Average of variants
0	IMC	4331	202576	46.7735
1	IMC	295	8642	29.2949
2	IMC	1606	51108	31.8232
3	IMC	311	18316	58.8939
4	IMC	996	18125	18.1978
5	OLG	302	19063	63.1225
6	ASC	67	1564	23.3433
7	IMC	868	34978	40.2972
8	IMC	811	11114	13.7041
9	OLG	51	2201	43.1569
10	NEUR	129	4912	38.0775
11	IMC	447	14816	33.1454
12	IMC	82	2464	30.0488
13	IMC	225	5739	25.5067
14	IMC	66	3216	48.7273
15	IMC	142	2565	18.0634
16	IMC	103	4660	45.2427
17	EC	40	757	18.925
18	IMC	89	1473	16.5506
22	IMC	16	351	21.9375
23	NEUR	12	473	39.4167
	Total cell number	10989	409113
